# Supplementary material for: Integrative analysis of cancer dependency data and comprehensive phosphoproteomics data revealed the EPHA2-PARD3 axis as a cancer vulnerability in KRAS-mutant colorectal cancer
Source: Royal Society of Chemistry journal article supplement (doi:10.1039/d3mo00042g), 2023-05-16
Supplement: d3mo00042g2.pdf [file d3mo00042g2.pdf]

**Correlation between our phosphoproteomic data and Frejno, M., Meng, C., Ruprecht, B. et al., 2020 data (n=23, 1,827 phosphosites)**

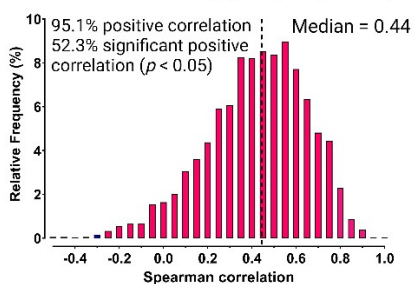

1

2 **Supplemental Figure 1. Comparison between our phosphoproteomics data and data from a**  
3 **previously reported large-scale phosphoproteomics study of CRC cell lines, related to**  
4 **Figure 1.**

5 Spearman's correlation between our phosphoproteomics data and data from Frejno, M., Meng,  
6 C., Ruprecht B, et al. (2020). The 1,827 phosphosites across 23 CRC cell lines shared in both  
7 datasets were used in this study.

8

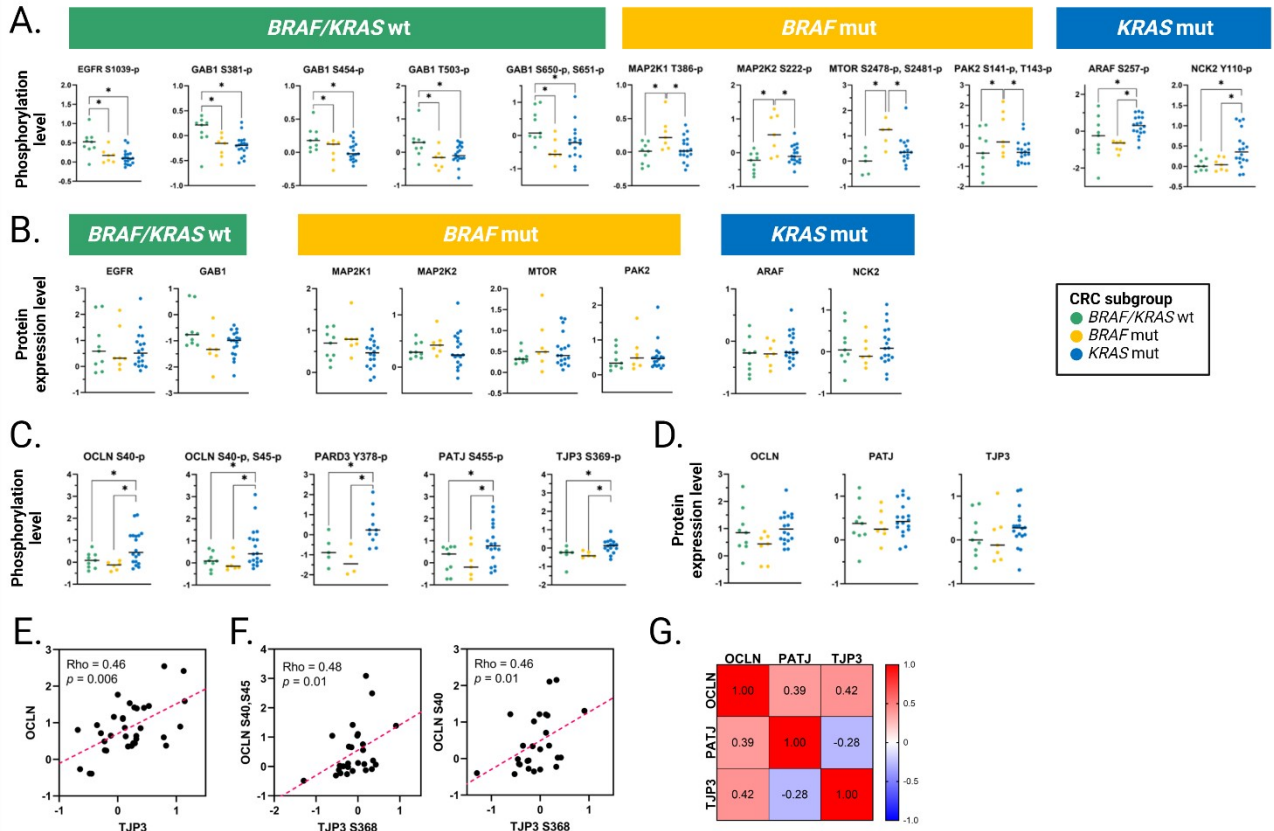

10

11 **Supplemental Figure 2. Boxplots and correlation matrix of proteins and phosphorylation**  
 12 **sites in the enriched pathway that showed differential expression between the CRC**  
 13 **subgroups, related to Figure 2.**

14 A. Beeswarm plots of the 11 phosphosites of the ErbB signalling pathway showing differential  
 15 regulation among CRC subgroups. The horizontal line represents the median.

16 B. Beeswarm plots of the 8 proteins of the ErbB signalling pathway among CRC subgroups. The  
 17 horizontal line represents the median.

18 C. Beeswarm plots of the 5 phosphorylation sites of tight junction signalling showing differential  
 19 regulation among CRC subgroups. The horizontal line represents the median.

- 20 D. Beeswarm plots of the 3 protein components of tight junction signalling among CRC  
21 subgroups. The horizontal line represents the median.
- 22 E. Correlation plot of the protein expression levels of TJP3 and OCLM.
- 23 F. Correlation plot of the phosphorylation levels of TJP3 S368 and OCLM S40 and S45.
- 24 G. Correlation matrix of the proteome expression levels of the key components of tight junctions  
25 in KRAS-mut cell lines (Spearman's test).

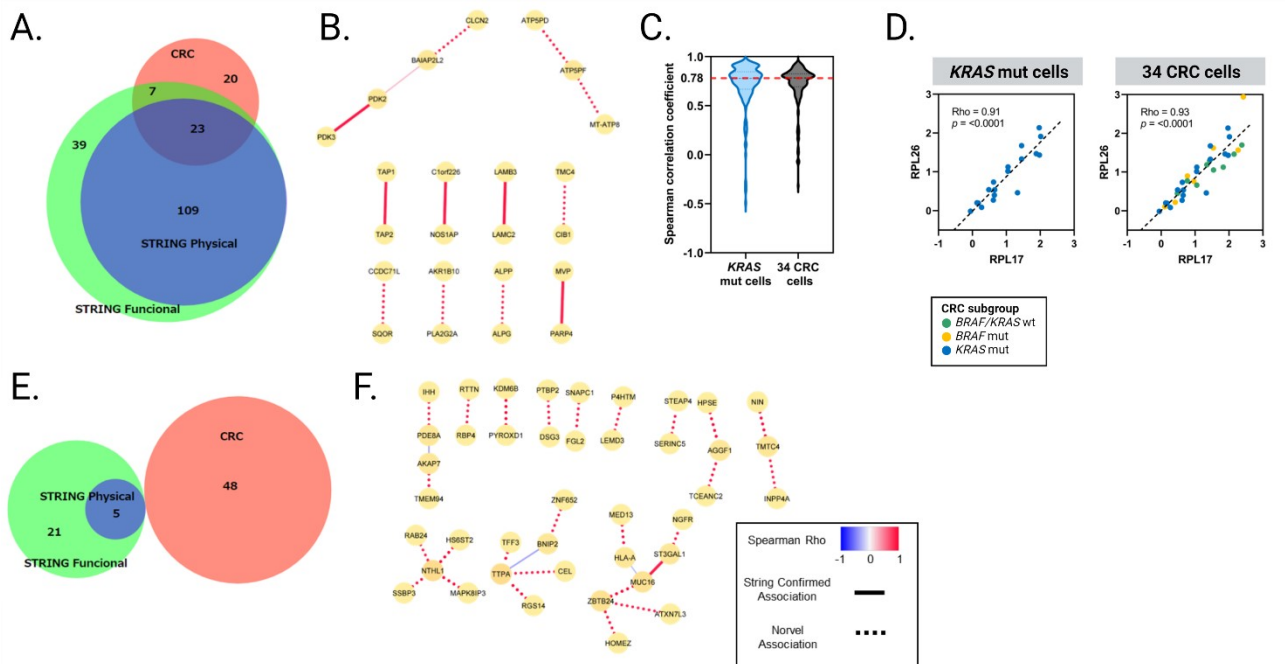

26

27 **Supplemental Figure 3. Protein coregulation analysis for the identification of**  
 28 **protein-protein associations in KRAS-mutant cells, related to Figure 3.**

29 A. Venn diagram of the commonly occurring protein pairs (the bottom 10% of protein-protein  
 30 interactions of the correlation difference) among STRING physical dataset, STING functional  
 31 dataset and our CRC dataset.

32 B. Protein-protein association network of the commonly occurring protein pairs (bottom 10%),  
 33 related to Fig. 3B.

34 C. Violin plot of the Spearman's correlation coefficient of functional protein-protein associations  
 35 based on the STRING database between KRAS-mutant cells and 34 CRC cell types.

36 D. Correlation plot of the protein expression levels of RPL17 and RPL26 in KRAS-mutant cells  
 37 and 34 other CRC cell lines.

38 E. Venn diagram of the KRAS-specific protein pairs (the top 10% of protein-protein interactions

39 of the correlation difference) among the STRING physical dataset, STING functional dataset and  
40 our CRC dataset.

41 F. Protein–protein association network of KRAS-specific protein pairs (top 10%) of the  
42 correlation difference, related to Fig. 3D.

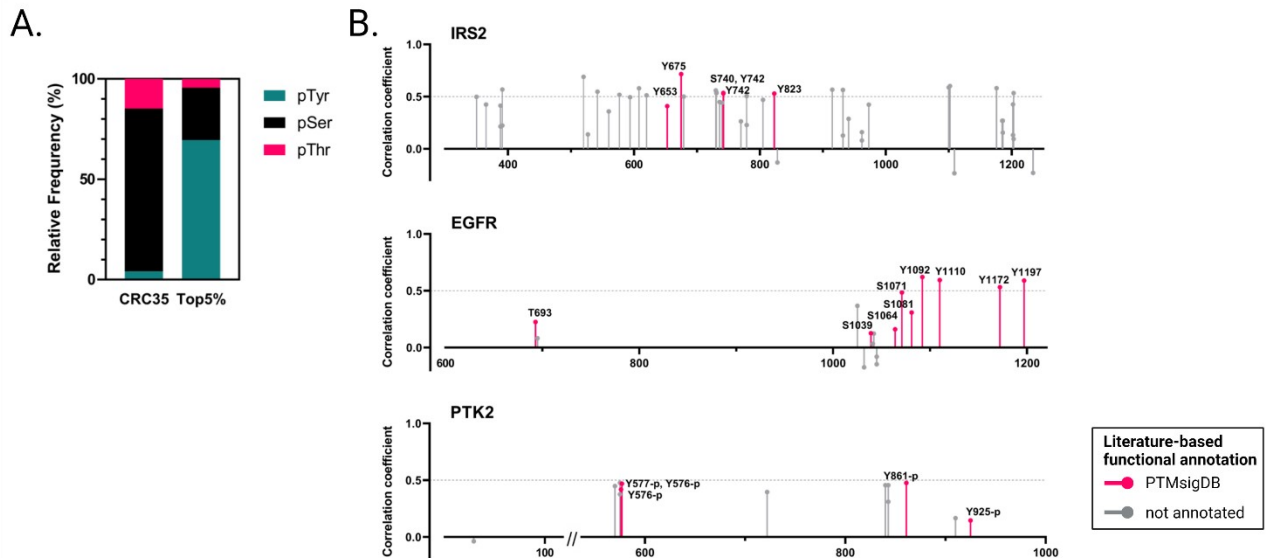

43

44 **Supplemental Figure 4. Features of phosphorylation sites showing a high correlation**  
 45 **between phosphorylation levels and gene dependency scores, related to Figure 4.**

46 A. Distribution comparing the relative frequency of phosphoserine (pSer, black),  
 47 phosphothreonine (pThr, red), and phosphotyrosine (pTyr, green) in the top 5% highly correlated  
 48 phosphosites with gene dependency scores with that in all quantified phosphosites in CRC35.

49 B. Spearman's correlation coefficient of phosphorylation sites identified in IRS2 (top), EGFR  
 50 (middle) and PTK2 (down) with unknown (grey) and known activation in PTMsigDB (deep  
 51 pink).

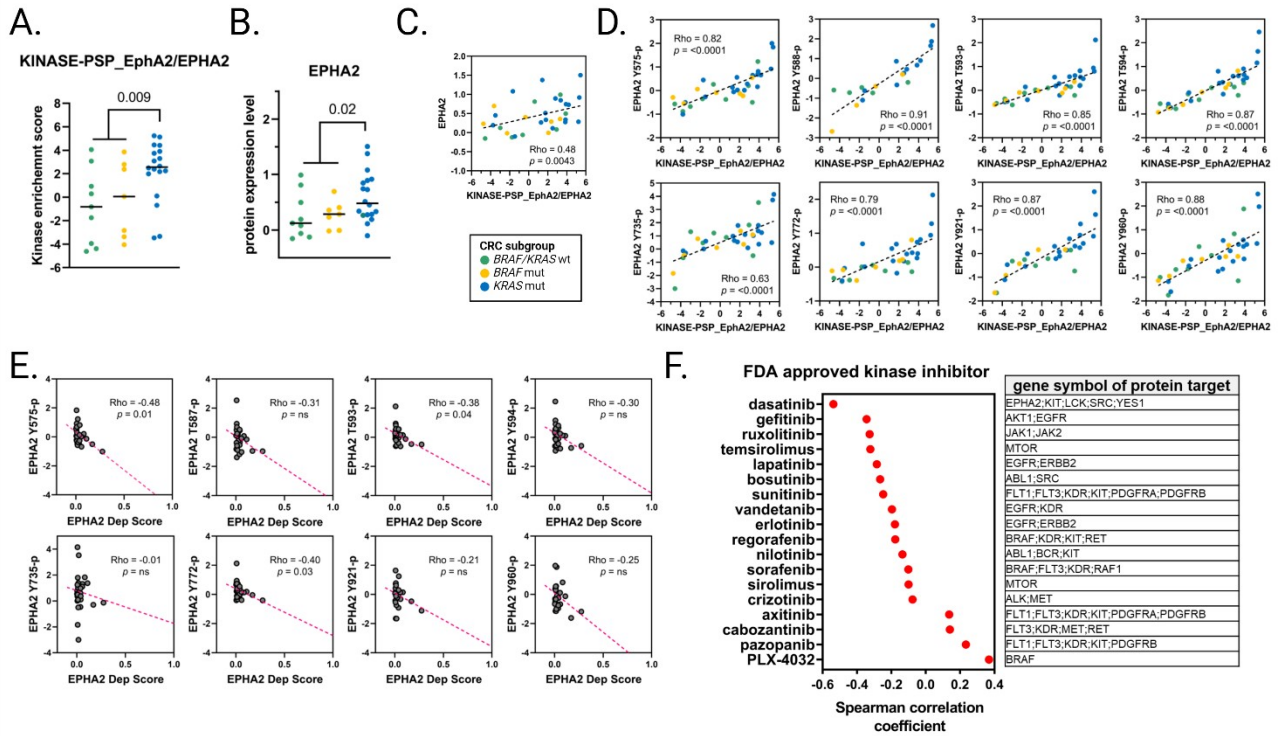

52

53 **Supplemental Figure 5. Potential therapeutic opportunity for KRAS-mutant cells, related**  
54 **to Figure 5.**

55 A. Beeswarm plots of EPHA2 kinase enrichment scores showing differential enrichment between  
56 the CRC subgroups ( $p$  value = 0.009, Welch's t test between KRAS mut vs. (BRAF mut and  
57 BRAF/KRAS wt)).

58 B. Beeswarm plots of EPHA2 protein expression levels showing differential expression between  
59 the CRC subgroups ( $p$  value = 0.02, Welch's t test between KRAS mut vs. BRAF mut and  
60 BRAF/KRAS wt).

61 C. Correlation plots between EPHA2 kinase enrichment scores and protein expression levels of  
62 EPHA2.

63 D. Correlation plots between EPHA2 kinase enrichment scores and phosphorylation levels of  
64 substrates on EPHA2.

65 E. Correlation plots between EPHA2 dependency scores and phosphorylation levels of substrates  
66 on EPHA2.

67 F. List of Spearman's correlation coefficients between phosphorylation levels of PARD3 Y378  
68 and CTD2 AUCs of FDA-approved kinase inhibitors. Gene symbols of the protein targets for  
69 each inhibitor are shown in the right table.

70



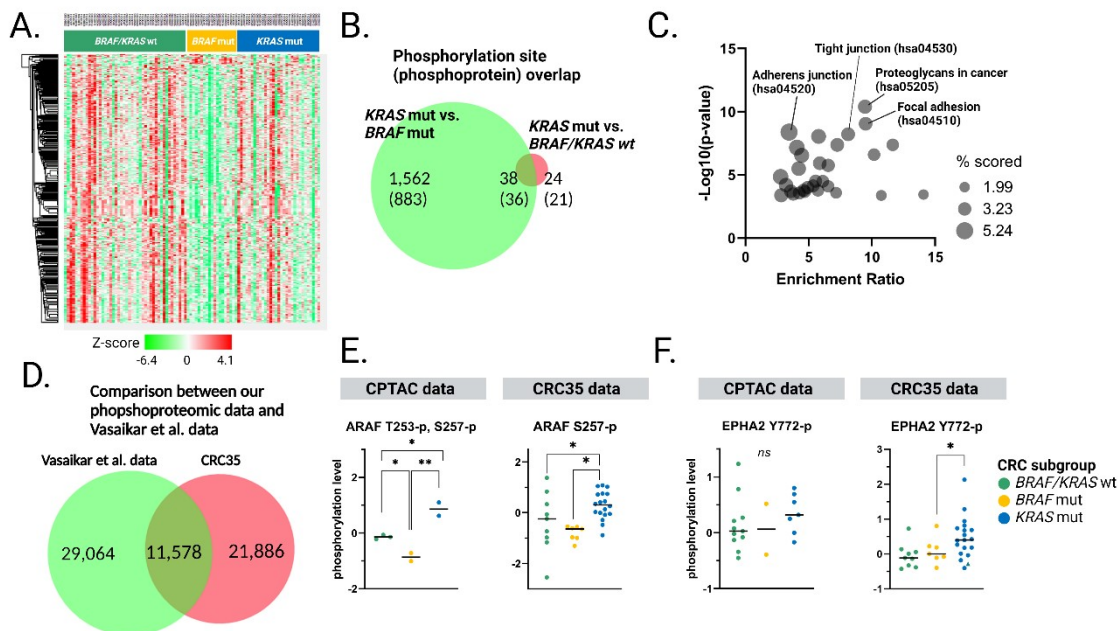

71

72 **Supplemental Figure 6. Comparison of the phosphoproteomic data of CRC35 with data**  
 73 **from the CPTAC Colon Cancer Study**

74 A. Hierarchical clustering of 4,103 significantly regulated phosphorylation sites according to the  
 75 KRAS and BRAF mutational status (p value < 0.05, FDR < 0.1, one-way ANOVA followed by  
 76 Tukey’s post hoc test).

77 B. Venn diagram of significantly upregulated phosphorylation sites (phosphoproteins) in the  
 78 KRAS mut vs. BRAF mut or KRAS mut vs. BRAF/KRAS wt subgroups.

79 C. Bubble plot of the KEGG pathway enrichment of differentially expressed genes (DEGs) in the  
 80 KRAS mut group. The bubble size corresponds to the % scored in the pathway. The % score  
 81 indicates the ratio of the number of DEGs mapped to a certain pathway to the total number of  
 82 genes mapped to the pathway.

83 D. Venn diagram demonstrating the overlap between in-house CRC35 phosphoproteomic data  
84 and CPTAC phosphoproteomic data (Vasaikar, et al. 2019).

85 E. and F. Beeswarm plots of the phosphorylation levels of ARAF-T253, S257 (E), and EPHA2-  
86 Y772 (F) showing differential regulation among the various KRAS and BRAF mutational status  
87 subgroups in the CPTAC data (left) and CRC35 data (right). The horizontal line represents the  
88 median.

89
