# Supplementary material for: Integrative analysis of cancer dependency data and comprehensive phosphoproteomics data revealed the EPHA2-PARD3 axis as a cancer vulnerability in KRAS-mutant colorectal cancer
Source: Royal Society of Chemistry journal article supplement (doi:10.1039/d3mo00042g), 2023-05-16
Supplement: d3mo00042g4.xlsx [file d3mo00042g4.xlsx]

## Sheet: Table S2A 
Table S2A: Phosphoproteomics data of CRC35, related to Figures 2, 3, and 4
																																	BRAF/ KRAS wt	BRAF/ KRAS wt	BRAF/ KRAS wt	BRAF/ KRAS wt	BRAF/ KRAS wt	BRAF/ KRAS wt	BRAF/ KRAS wt	BRAF/ KRAS wt	BRAF/ KRAS wt	BRAF mut	BRAF mut	BRAF mut	BRAF mut	BRAF mut	BRAF mut	BRAF mut	KRAS mut
Unique identifier	Amino acid	Charge	Multiplicity	Phospho (STY) Probabilities	Localization prob	PEP	Score	Delta score	Score for localization	Mass error [ppm]	Intensity	Position	Localization prob E1	Localization prob E2	Localization prob E3	Localization prob E4	Localization prob E5	Localization prob E6	Localization prob E7	Localization prob E8	Localization prob E9	Proteins	Positions within proteins	Leading proteins	Protein	Protein names	Gene names	Sequence window	Fasta headers	Number of Phospho (STY)	Protein group IDs	Number of valid value out of total 105 replicate samples	C2BBe1	CaR-1	CCK-81	CW-2	HT55	NCI-H508	NCI-H716	SNU-C1	SW48	COLO205	HT115	HT29	LS411N	MDST8	RKO	SW1417	GP5d
UID11	S	4	___1	QTLQDSFLLDLKS(0.998)PPS(0.002)FPVEISDR	0.998053	7.38e-18	120.57	102.33	120.57	-0.50289	11307000	105	NaN	NaN	NaN	NaN	0	0.943476	NaN	NaN	0.998053	A0AV02-5;A0AV02-3;A0AV02;A0AV02-2;A0AV02-4	105;312;511;540;264	A0AV02-5	A0AV02-5	Solute carrier family 12 member 8	SLC12A8	ATKQTLQDSFLLDLKSPPSFPVEISDRLPAA	sp|A0AV02-5|S12A8_HUMAN Isoform 5 of Solute carrier family 12 member 8 OS=Homo sapiens OX=9606 GN=SLC12A8;sp|A0AV02-3|S12A8_HUMAN Isoform 3 of Solute carrier family 12 member 8 OS=Homo sapiens OX=9606 GN=SLC12A8;sp|A0AV02|S12A8_HUMAN Solute carrier family	1	5	0	NaN	NaN	NaN	NaN	NaN	NaN	NaN	NaN	NaN	NaN	NaN	NaN	NaN	NaN	NaN	NaN	NaN
UID141	S	3	___1	ERS(0.145)PS(0.608)S(0.247)PVPVVK	0.607528	9.28e-05	97.417	35.159	97.417	0.20888	61360000	762	0	0.333333	NaN	NaN	0	0.607528	0	0	NaN	A2RUB6-3;A2RUB6	762;796	A2RUB6-3	A2RUB6-3	Coiled-coil domain-containing protein 66	CCDC66	EEPLNIHSFSKERSPSSPVPVVKNRTQQTQN	sp|A2RUB6-3|CCD66_HUMAN Isoform 3 of Coiled-coil domain-containing protein 66 OS=Homo sapiens OX=9606 GN=CCDC66;sp|A2RUB6|CCD66_HUMAN Coiled-coil domain-containing protein 66 OS=Homo sapiens OX=9606 GN=CCDC66 PE=1 SV=4	1	32	0	NaN	NaN	NaN	NaN	NaN	NaN	NaN	NaN	NaN	NaN	NaN	NaN	NaN	NaN	NaN	NaN	NaN
UID176	S	3	___1	VLTPELS(1)EEEVSTR	0.999957	9.23e-05	87.24	65.367	80.585	0.26298	60902000	491	NaN	0.999957	NaN	0.999939	0.982519	NaN	NaN	0.999802	NaN	A4FU49-6;A4FU49;A4FU49-3	491;375;380	A4FU49-6	A4FU49-6	SH3 domain-containing protein 21	SH3D21	GDEAPTLEKVLTPELSEEEVSTRDDIQFHHF	sp|A4FU49-6|SH321_HUMAN Isoform 5 of SH3 domain-containing protein 21 OS=Homo sapiens OX=9606 GN=SH3D21;sp|A4FU49|SH321_HUMAN SH3 domain-containing protein 21 OS=Homo sapiens OX=9606 GN=SH3D21 PE=2 SV=2;sp|A4FU49-3|SH321_HUMAN Isoform 2 of SH3 domain-conta	1;2	41	0	NaN	NaN	NaN	NaN	NaN	NaN	NaN	NaN	NaN	NaN	NaN	NaN	NaN	NaN	NaN	NaN	NaN
UID181	S	3	___1	ADLGPGS(1)PPWAVK	1	4.16e-05	102.65	82.268	63.037	-0.0023453	37449000	253	1	0	0	NaN	NaN	1	NaN	1	NaN	A5PL33-3;A5PL33-2;A5PL33	253;252;253	A5PL33-3	A5PL33-3	Protein KRBA1	KRBA1	SLGTSRLTRADLGPGSPPWAVKTEAVSGDCP	sp|A5PL33-3|KRBA1_HUMAN Isoform 3 of Protein KRBA1 OS=Homo sapiens OX=9606 GN=KRBA1;sp|A5PL33-2|KRBA1_HUMAN Isoform 2 of Protein KRBA1 OS=Homo sapiens OX=9606 GN=KRBA1;sp|A5PL33|KRBA1_HUMAN Protein KRBA1 OS=Homo sapiens OX=9606 GN=KRBA1 PE=1 SV=3	1	44	0	NaN	NaN	NaN	NaN	NaN	NaN	NaN	NaN	NaN	NaN	NaN	NaN	NaN	NaN	NaN	NaN	NaN
UID194	S	2	___1	IS(0.058)S(0.921)T(0.017)S(0.003)S(0.001)LVK	0.921465	0.000529238	118.28	73.831	118.28	0.24637	63311000	80	NaN	NaN	NaN	0	NaN	0.921465	NaN	0.463457	NaN	A6H8Y1-6;A6H8Y1;A6H8Y1-7;A6H8Y1-2;A6H8Y1-4;A6H8Y1-3	80;100;100;100;100;100	A6H8Y1-6	A6H8Y1-6	Transcription factor TFIIIB component B'' homolog	BDP1	SRSSSTVSQRRKRISSTSSLVKSSVSVPSES	sp|A6H8Y1-6|BDP1_HUMAN Isoform 6 of Transcription factor TFIIIB component B'' homolog OS=Homo sapiens OX=9606 GN=BDP1;sp|A6H8Y1|BDP1_HUMAN Transcription factor TFIIIB component B'' homolog OS=Homo sapiens OX=9606 GN=BDP1 PE=1 SV=3;sp|A6H8Y1-7|BDP1_HUMAN Is	1	46	0	NaN	NaN	NaN	NaN	NaN	NaN	NaN	NaN	NaN	NaN	NaN	NaN	NaN	NaN	NaN	NaN	NaN
UID198	S	3	___1	ACDGVVHTPAEPT(0.11)GDS(0.89)R	0.890098	3.08e-05	102.15	85.267	102.15	-0.033299	54728000	294	NaN	NaN	NaN	0	0.890098	NaN	NaN	NaN	NaN	A6NCS6	294	A6NCS6	A6NCS6	Uncharacterized protein C2orf72	C2orf72	ACDGVVHTPAEPTGDSR______________	sp|A6NCS6|CB072_HUMAN Uncharacterized protein C2orf72 OS=Homo sapiens OX=9606 GN=C2orf72 PE=1 SV=2	1	47	0	NaN	NaN	NaN	NaN	NaN	NaN	NaN	NaN	NaN	NaN	NaN	NaN	NaN	NaN	NaN	NaN	NaN
UID236	S	2	___1	AALHT(0.002)T(0.001)PDS(0.997)PAAQLER	0.996818	1.83e-51	116	92.441	116	0.30546	139850000	10	NaN	NaN	0	NaN	NaN	0.996818	0	0.669877	NaN	A6NFI3	10	A6NFI3	A6NFI3	Zinc finger protein 316	ZNF316	______MAALHTTPDSPAAQLERAEDGSECD	sp|A6NFI3|ZN316_HUMAN Zinc finger protein 316 OS=Homo sapiens OX=9606 GN=ZNF316 PE=1 SV=1	1	52	0	NaN	NaN	NaN	NaN	NaN	NaN	NaN	NaN	NaN	NaN	NaN	NaN	NaN	NaN	NaN	NaN	NaN
UID239	S	3	___1	S(0.841)PT(0.159)TELSSK	0.840706	7.24e-05	99.174	66.074	86.463	0.24463	176960000	383	NaN	0	NaN	NaN	0	0.824677	NaN	0.840706	0.788525	A6NGB9	383	A6NGB9	A6NGB9	WAS/WASL-interacting protein family member 3	WIPF3	AGGGKLNPPPAPPARSPTTELSSKSQQATAW	sp|A6NGB9|WIPF3_HUMAN WAS/WASL-interacting protein family member 3 OS=Homo sapiens OX=9606 GN=WIPF3 PE=1 SV=4	1	53	0	NaN	NaN	NaN	NaN	NaN	NaN	NaN	NaN	NaN	NaN	NaN	NaN	NaN	NaN	NaN	NaN	NaN
UID283	S	3	___1	S(0.712)T(0.144)S(0.144)GEGFQFGK	0.712134	2.52e-05	108.32	94.554	108.32	-0.02901	50757000	1953	0	NaN	NaN	NaN	0.712134	NaN	NaN	NaN	NaN	A6NKT7;O14715;Q99666;P0DJD1;P0DJD0;P49792;Q7Z3J3	978;977;977;970;962;1953;978	A6NKT7;O14715;P0DJD1;P49792;Q7Z3J3	P49792	RanBP2-like and GRIP domain-containing protein 3;RANBP2-like and GRIP domain-containing protein 8;RANBP2-like and GRIP domain-containing protein 5/6;RANBP2-like and GRIP domain-containing protein 2;RANBP2-like and GRIP domain-containing protein 1;E3 SUMO-protein ligase RanBP2;RanBP2-like and GRIP domain-containing protein 4	RGPD3;RGPD8;RGPD5;RGPD2;RGPD1;RANBP2;RGPD4	FGQTSSTFTFADLAKSTSGEGFQFGKKDPNF;FGQTSSTFTFADVAKSTSGEGFQFGKKDLNF;FGQTSSTFTFADVAKSTSGEGFQFGKKDPNF	sp|A6NKT7|RGPD3_HUMAN RanBP2-like and GRIP domain-containing protein 3 OS=Homo sapiens OX=9606 GN=RGPD3 PE=3 SV=2;sp|O14715|RGPD8_HUMAN RANBP2-like and GRIP domain-containing protein 8 OS=Homo sapiens OX=9606 GN=RGPD8 PE=1 SV=2;sp|Q99666|RGPD5_HUMAN RANBP2	1	63;262;1131;1939;3941	0	NaN	NaN	NaN	NaN	NaN	NaN	NaN	NaN	NaN	NaN	NaN	NaN	NaN	NaN	NaN	NaN	NaN
UID298	S	4	___1	DGEKS(0.659)GT(0.339)VS(0.002)SQK	0.659309	0.00262395	69.345	19.844	49.482	-2.6372	88103000	712	0.49986	0.499577	NaN	NaN	0.659309	0	0	0	0	A6QL64;Q5JPF3-3;Q8N2N9-3;Q8N2N9-2;Q8N2N9;Q5JPF3	712;179;422;422;422;746	A6QL64;Q5JPF3	A6QL64	Ankyrin repeat domain-containing protein 36A;Ankyrin repeat domain-containing protein 36C;Ankyrin repeat domain-containing protein 36B	ANKRD36;ANKRD36C;ANKRD36B	DSVSNIATEIKDGEKSGTVSSQKQPALKATT	sp|A6QL64|AN36A_HUMAN Ankyrin repeat domain-containing protein 36A OS=Homo sapiens OX=9606 GN=ANKRD36 PE=2 SV=4;sp|Q5JPF3-3|AN36C_HUMAN Isoform 3 of Ankyrin repeat domain-containing protein 36C OS=Homo sapiens OX=9606 GN=ANKRD36C;sp|Q8N2N9-3|AN36B_HUMAN Is	1	67;3360	0	NaN	NaN	NaN	NaN	NaN	NaN	NaN	NaN	NaN	NaN	NaN	NaN	NaN	NaN	NaN	NaN	NaN
UID439	S	3	___1	RPPVVVNLS(0.01)T(0.089)S(0.901)PR	0.900829	0.00140237	72.417	48.227	72.417	-0.059277	245460000	499	NaN	0	0	0.531609	0.900829	NaN	0.769395	0	0.735919	C9J069	499	C9J069	C9J069	Uncharacterized protein C9orf172	C9orf172	SPEGRRPPVVVNLSTSPRRYAALSLSETSLT	sp|C9J069|AJM1_HUMAN Apical junction component 1 homolog OS=Homo sapiens OX=9606 GN=AJM1 PE=3 SV=1	1	95	0	NaN	NaN	NaN	NaN	NaN	NaN	NaN	NaN	NaN	NaN	NaN	NaN	NaN	NaN	NaN	NaN	NaN
UID480	S	3	___1	YRAS(1)ALGSDGVR	0.999998	0.00013157	95.197	69.08	95.197	-0.025592	204610000	6	0.994635	NaN	NaN	NaN	0.999998	0.995497	0.999968	0.999925	0.994425	O00159-3	6	O00159-3	O00159-3	Unconventional myosin-Ic	MYO1C	__________MRYRASALGSDGVRVTMESAL	sp|O00159-3|MYO1C_HUMAN Isoform 3 of Unconventional myosin-Ic OS=Homo sapiens OX=9606 GN=MYO1C	1	158	0	NaN	NaN	NaN	NaN	NaN	NaN	NaN	NaN	NaN	NaN	NaN	NaN	NaN	NaN	NaN	NaN	NaN
UID536	S	4	___1	SGEVAEGEARS(0.998)PS(0.002)HK	0.998082	3.29e-11	131.98	112.97	131.98	0.18511	110280000	291	NaN	0	NaN	NaN	0.998082	0	NaN	0	NaN	O00257	291	O00257	O00257	E3 SUMO-protein ligase CBX4	CBX4	AVKIKSGEVAEGEARSPSHKKRAADERHPPA	sp|O00257|CBX4_HUMAN E3 SUMO-protein ligase CBX4 OS=Homo sapiens OX=9606 GN=CBX4 PE=1 SV=3	1	172	0	NaN	NaN	NaN	NaN	NaN	NaN	NaN	NaN	NaN	NaN	NaN	NaN	NaN	NaN	NaN	NaN	NaN
UID617	S	3	___1	DASTLQS(1)QK	0.999999	0.000122619	108.9	71.347	108.9	0.060136	20208000	80	NaN	NaN	NaN	NaN	NaN	0.999999	NaN	0.999871	0.999967	O00479	80	O00479	O00479	High mobility group nucleosome-binding domain-containing protein 4	HMGN4	DGNNPAKNRDASTLQSQKAEGTGDAK_____	sp|O00479|HMGN4_HUMAN High mobility group nucleosome-binding domain-containing protein 4 OS=Homo sapiens OX=9606 GN=HMGN4 PE=1 SV=3	1	201	0	NaN	NaN	NaN	NaN	NaN	NaN	NaN	NaN	NaN	NaN	NaN	NaN	NaN	NaN	NaN	NaN	NaN
UID625	S	3	___1	S(0.449)PS(0.555)QS(0.577)S(0.419)LPAVVVETFPATVNGTVEGGSGAGR	0.577421	3.09e-14	90.036	78.512	84.98	-0.63414	73706000	304	NaN	NaN	NaN	NaN	NaN	0.529689	0.43982	NaN	0.577421	O00499-9;O00499-10	304;319	O00499-9	O00499-9	Myc box-dependent-interacting protein 1	BIN1	GGATPGATLPKSPSQSSLPAVVVETFPATVN	sp|O00499-9|BIN1_HUMAN Isoform BIN1-10-13 of Myc box-dependent-interacting protein 1 OS=Homo sapiens OX=9606 GN=BIN1;sp|O00499-10|BIN1_HUMAN Isoform BIN1-13 of Myc box-dependent-interacting protein 1 OS=Homo sapiens OX=9606 GN=BIN1	1;2	206	0	NaN	NaN	NaN	NaN	NaN	NaN	NaN	NaN	NaN	NaN	NaN	NaN	NaN	NaN	NaN	NaN	NaN
UID644	S	3	___1	SSPSGNTQS(0.712)S(0.287)PK	0.71242	2.57e-10	136.7	102.45	77.776	-0.67176	466890000	18	0.626944	0.687302	NaN	0.684985	NaN	0.71242	NaN	NaN	NaN	O00512	18	O00512	O00512	B-cell CLL/lymphoma 9 protein	BCL9	SSNPKVRSSPSGNTQSSPKSKQEVMVRPPTV	sp|O00512|BCL9_HUMAN B-cell CLL/lymphoma 9 protein OS=Homo sapiens OX=9606 GN=BCL9 PE=1 SV=4	1;2	209	0	NaN	NaN	NaN	NaN	NaN	NaN	NaN	NaN	NaN	NaN	NaN	NaN	NaN	NaN	NaN	NaN	NaN
UID675	S	3	___1	VLAS(0.005)EKT(0.076)S(0.896)LS(0.023)EK	0.896029	0.000870987	78.902	56.099	72.797	0.27629	176040000	213	NaN	NaN	NaN	0.714636	NaN	0.87694	0.896029	0.883476	NaN	O00515	213	O00515	O00515	Ladinin-1	LAD1	DKTSISEKVLASEKTSLSEKIAVSEKRNSSE	sp|O00515|LAD1_HUMAN Ladinin-1 OS=Homo sapiens OX=9606 GN=LAD1 PE=1 SV=2	1	210	0	NaN	NaN	NaN	NaN	NaN	NaN	NaN	NaN	NaN	NaN	NaN	NaN	NaN	NaN	NaN	NaN	NaN
UID691	S	4	___1	SAASNTGTPDGPEAPPGPDAS(0.967)PDAS(0.033)FGK	0.967421	9.37e-12	91.078	74.277	91.078	-0.51195	136550000	300	NaN	0	NaN	NaN	0.919452	0.896012	NaN	0.967421	NaN	O00562-2;O00562	300;300	O00562-2	O00562-2	Membrane-associated phosphatidylinositol transfer protein 1	PITPNM1	TGTPDGPEAPPGPDASPDASFGKQWSSSSRS	sp|O00562-2|PITM1_HUMAN Isoform 2 of Membrane-associated phosphatidylinositol transfer protein 1 OS=Homo sapiens OX=9606 GN=PITPNM1;sp|O00562|PITM1_HUMAN Membrane-associated phosphatidylinositol transfer protein 1 OS=Homo sapiens OX=9606 GN=PITPNM1 PE=1 SV	1	215	0	NaN	NaN	NaN	NaN	NaN	NaN	NaN	NaN	NaN	NaN	NaN	NaN	NaN	NaN	NaN	NaN	NaN
UID713	S	3	___1	DKDAYS(0.283)S(0.717)FGSR	0.716544	0.00399832	66.387	53.547	66.387	-0.2326	311420000	71	0	NaN	0	0.692892	0.716544	0	NaN	NaN	NaN	O00571;O00571-2;O15523-2;O15523;O15523-3	71;55;68;71;71	O00571	O00571	ATP-dependent RNA helicase DDX3X;ATP-dependent RNA helicase DDX3Y	DDX3X;DDX3Y	DSSGWSSSKDKDAYSSFGSRSDSRGKSSFFS	sp|O00571|DDX3X_HUMAN ATP-dependent RNA helicase DDX3X OS=Homo sapiens OX=9606 GN=DDX3X PE=1 SV=3;sp|O00571-2|DDX3X_HUMAN Isoform 2 of ATP-dependent RNA helicase DDX3X OS=Homo sapiens OX=9606 GN=DDX3X;sp|O15523-2|DDX3Y_HUMAN Isoform 2 of ATP-dependent RNA	1	218	0	NaN	NaN	NaN	NaN	NaN	NaN	NaN	NaN	NaN	NaN	NaN	NaN	NaN	NaN	NaN	NaN	NaN
UID723	S	3	___1	SSFFSDRGS(0.342)GS(0.658)R	0.65781	2.13e-16	160.98	119.89	160.98	-0.035332	400390000	92	NaN	NaN	NaN	NaN	NaN	0.65781	NaN	NaN	NaN	O00571;O00571-2	92;76	O00571	O00571	ATP-dependent RNA helicase DDX3X	DDX3X	DSRGKSSFFSDRGSGSRGRFDDRGRSDYDGI	sp|O00571|DDX3X_HUMAN ATP-dependent RNA helicase DDX3X OS=Homo sapiens OX=9606 GN=DDX3X PE=1 SV=3;sp|O00571-2|DDX3X_HUMAN Isoform 2 of ATP-dependent RNA helicase DDX3X OS=Homo sapiens OX=9606 GN=DDX3X	1	218	0	NaN	NaN	NaN	NaN	NaN	NaN	NaN	NaN	NaN	NaN	NaN	NaN	NaN	NaN	NaN	NaN	NaN
UID757	S	3	___1	RAS(1)PEPDAAAAPR	1	3.99e-06	116.6	103.49	104.88	0.21003	173590000	157	NaN	0	0	NaN	1	NaN	NaN	1	NaN	O14492;O14492-2	157;200	O14492	O14492	SH2B adapter protein 2	SH2B2	LCVVDGVRDMWHRRASPEPDAAAAPRTAEPR	sp|O14492|SH2B2_HUMAN SH2B adapter protein 2 OS=Homo sapiens OX=9606 GN=SH2B2 PE=1 SV=2;sp|O14492-2|SH2B2_HUMAN Isoform 2 of SH2B adapter protein 2 OS=Homo sapiens OX=9606 GN=SH2B2	1	227	0	NaN	NaN	NaN	NaN	NaN	NaN	NaN	NaN	NaN	NaN	NaN	NaN	NaN	NaN	NaN	NaN	NaN
UID777	S	3	___1	S(0.546)NS(0.454)VGIQDAFNDGSDSTFQK	0.545984	1.3e-10	128.97	109.58	128.97	-0.49296	252590000	1182	0	0.499984	0.542513	NaN	NaN	0.545984	NaN	NaN	0	O14497;O14497-2;O14497-3	1182;1182;799	O14497	O14497	AT-rich interactive domain-containing protein 1A	ARID1A	STPHSQIPPLPGMSRSNSVGIQDAFNDGSDS	sp|O14497|ARI1A_HUMAN AT-rich interactive domain-containing protein 1A OS=Homo sapiens OX=9606 GN=ARID1A PE=1 SV=3;sp|O14497-2|ARI1A_HUMAN Isoform 2 of AT-rich interactive domain-containing protein 1A OS=Homo sapiens OX=9606 GN=ARID1A;sp|O14497-3|ARI1A_HUM	1	230	0	NaN	NaN	NaN	NaN	NaN	NaN	NaN	NaN	NaN	NaN	NaN	NaN	NaN	NaN	NaN	NaN	NaN
UID821	S	3	___1	RAS(1)APLPGLSAPGR	0.999999	0.00103918	73.76	53.097	73.76	0.40982	19721000	16	NaN	NaN	NaN	NaN	0.999999	NaN	NaN	NaN	NaN	O14558	16	O14558	O14558	Heat shock protein beta-6	HSPB6	MEIPVPVQPSWLRRASAPLPGLSAPGRLFDQ	sp|O14558|HSPB6_HUMAN Heat shock protein beta-6 OS=Homo sapiens OX=9606 GN=HSPB6 PE=1 SV=2	1	238	0	NaN	NaN	NaN	NaN	NaN	NaN	NaN	NaN	NaN	NaN	NaN	NaN	NaN	NaN	NaN	NaN	NaN
UID929	S	2	___1	RAS(0.286)S(0.714)VLAQR	0.714024	0.00102474	101.57	83.509	101.57	-0.34123	57429000	33	NaN	NaN	0	NaN	0.714024	NaN	NaN	NaN	NaN	O14681-3;O14681	33;47	O14681-3	O14681-3	Etoposide-induced protein 2.4 homolog	EI24	RIQQKREEQRRRRASSVLAQRRAQSIERKQE	sp|O14681-3|EI24_HUMAN Isoform 2 of Etoposide-induced protein 2.4 homolog OS=Homo sapiens OX=9606 GN=EI24;sp|O14681|EI24_HUMAN Etoposide-induced protein 2.4 homolog OS=Homo sapiens OX=9606 GN=EI24 PE=1 SV=4	1	257	0	NaN	NaN	NaN	NaN	NaN	NaN	NaN	NaN	NaN	NaN	NaN	NaN	NaN	NaN	NaN	NaN	NaN
UID935	S	4	___1	ASFGATGGPPAHLLT(1)PS(1)PLSGPGGSSLLEK	0.99968	6.25e-56	170.44	142.23	112.73	-0.0063634	313000000	3199	NaN	0.99968	0.865104	0.864232	0.998584	0.999626	0.998942	0.994987	0.884009	O14686;O14686-3	3199;3202	O14686	O14686	Histone-lysine N-methyltransferase 2D	KMT2D	SFGATGGPPAHLLTPSPLSGPGGSSLLEKFE	sp|O14686|KMT2D_HUMAN Histone-lysine N-methyltransferase 2D OS=Homo sapiens OX=9606 GN=KMT2D PE=1 SV=2;sp|O14686-3|KMT2D_HUMAN Isoform 3 of Histone-lysine N-methyltransferase 2D OS=Homo sapiens OX=9606 GN=KMT2D	1;2	260	0	NaN	NaN	NaN	NaN	NaN	NaN	NaN	NaN	NaN	NaN	NaN	NaN	NaN	NaN	NaN	NaN	NaN
UID989	S	3	___1	LVEPGS(1)PAEK	1	5.7e-06	138.24	108.49	138.24	0.05	96492000	46	NaN	NaN	NaN	1	1	NaN	NaN	0	0	O14745	46	O14745	O14745	Na(+)/H(+) exchange regulatory cofactor NHE-RF1	SLC9A3R1	EKGKLGQYIRLVEPGSPAEKAGLLAGDRLVE	sp|O14745|NHRF1_HUMAN Na(+)/H(+) exchange regulatory cofactor NHE-RF1 OS=Homo sapiens OX=9606 GN=SLC9A3R1 PE=1 SV=4	1	267	0	NaN	NaN	NaN	NaN	NaN	NaN	NaN	NaN	NaN	NaN	NaN	NaN	NaN	NaN	NaN	NaN	NaN
UID1007	S	2	___1	GTGNAS(1)PDAR	0.99999	4.88e-06	129.04	79.481	107.17	0.53248	197690000	1251	0.999927	0.99999	0.999939	0	0.999832	0.999778	0.999952	0.999807	0.999844	O14795;O14795-2	1251;1251	O14795	O14795	Protein unc-13 homolog B	UNC13B	QMADILGQVRGTGNASPDARASAAQDADSVL	sp|O14795|UN13B_HUMAN Protein unc-13 homolog B OS=Homo sapiens OX=9606 GN=UNC13B PE=1 SV=2;sp|O14795-2|UN13B_HUMAN Isoform 2 of Protein unc-13 homolog B OS=Homo sapiens OX=9606 GN=UNC13B	1	273	0	NaN	NaN	NaN	NaN	NaN	NaN	NaN	NaN	NaN	NaN	NaN	NaN	NaN	NaN	NaN	NaN	NaN
UID1044	S	3	___1	S(1)AGGRPGSGPQLGTGR	0.999997	6.82e-05	101.89	80.942	101.89	-0.035472	322560000	225	NaN	0.999596	NaN	NaN	0.999997	0.999989	0	0.999986	NaN	O14908;O14908-2	225;128	O14908	O14908	PDZ domain-containing protein GIPC1	GIPC1	KLTEPRKAFDMISQRSAGGRPGSGPQLGTGR	sp|O14908|GIPC1_HUMAN PDZ domain-containing protein GIPC1 OS=Homo sapiens OX=9606 GN=GIPC1 PE=1 SV=2;sp|O14908-2|GIPC1_HUMAN Isoform 2 of PDZ domain-containing protein GIPC1 OS=Homo sapiens OX=9606 GN=GIPC1	1	285	0	NaN	NaN	NaN	NaN	NaN	NaN	NaN	NaN	NaN	NaN	NaN	NaN	NaN	NaN	NaN	NaN	NaN
UID1167	S	3	___1	AMTMPPVS(1)PVGAEGPVVLR	0.999891	2.74e-05	81.949	63.811	81.949	-0.75938	76939000	2359	NaN	NaN	NaN	NaN	NaN	0.999891	NaN	NaN	NaN	O15020	2359	O15020	O15020	Spectrin beta chain, non-erythrocytic 2	SPTBN2	STTRGMTRAMTMPPVSPVGAEGPVVLRSKDG	sp|O15020|SPTN2_HUMAN Spectrin beta chain, non-erythrocytic 2 OS=Homo sapiens OX=9606 GN=SPTBN2 PE=1 SV=3	1	309	0	NaN	NaN	NaN	NaN	NaN	NaN	NaN	NaN	NaN	NaN	NaN	NaN	NaN	NaN	NaN	NaN	NaN
UID1168	S	4	___1	LEHSSFPEGPGPGS(1)GDEANGPR	1	2.62e-16	131.94	112.04	131.94	0.032604	134150000	2171	NaN	0.999938	0.997001	0.999981	NaN	1	NaN	NaN	NaN	O15020;O15020-2	2171;2171	O15020	O15020	Spectrin beta chain, non-erythrocytic 2	SPTBN2	QRLEHSSFPEGPGPGSGDEANGPRGERQTRT	sp|O15020|SPTN2_HUMAN Spectrin beta chain, non-erythrocytic 2 OS=Homo sapiens OX=9606 GN=SPTBN2 PE=1 SV=3;sp|O15020-2|SPTN2_HUMAN Isoform 2 of Spectrin beta chain, non-erythrocytic 2 OS=Homo sapiens OX=9606 GN=SPTBN2	1	309	0	NaN	NaN	NaN	NaN	NaN	NaN	NaN	NaN	NaN	NaN	NaN	NaN	NaN	NaN	NaN	NaN	NaN
UID1202	S	5	___1	GS(0.006)VS(0.026)QPS(0.906)T(0.047)PS(0.012)PPKPT(0.001)GIFQT(0.001)S(0.001)ANS(0.001)SFEPVK	0.906039	4.2e-25	117.77	104.62	85.203	0.10085	3169600000	592	0.557095	0.513106	0.677999	0.515947	0	0.906039	0.544911	0.481074	0.582087	O15027;O15027-5;O15027-2;O15027-4;O15027-3	592;592;592;592;592	O15027	O15027	Protein transport protein Sec16A	SEC16A	ETTVSQNYRGSVSQPSTPSPPKPTGIFQTSA	sp|O15027|SC16A_HUMAN Protein transport protein Sec16A OS=Homo sapiens OX=9606 GN=SEC16A PE=1 SV=4;sp|O15027-5|SC16A_HUMAN Isoform 5 of Protein transport protein Sec16A OS=Homo sapiens OX=9606 GN=SEC16A;sp|O15027-2|SC16A_HUMAN Isoform 2 of Protein transpor	1;2;3	311	0	NaN	NaN	NaN	NaN	NaN	NaN	NaN	NaN	NaN	NaN	NaN	NaN	NaN	NaN	NaN	NaN	NaN
UID1226	S	4	___1	SPDPGIVPQEAPVGNS(0.002)LS(0.01)ELS(0.988)EENFDGK	0.988234	1.03e-11	90.323	80.527	90.323	0.090628	106850000	2042	NaN	NaN	0.988234	0	NaN	0.987065	NaN	0.536819	NaN	O15027;O15027-5;O15027-2;O15027-4;O15027-3	2042;2042;2042;2042;2042	O15027	O15027	Protein transport protein Sec16A	SEC16A	IVPQEAPVGNSLSELSEENFDGKFANLTPSR	sp|O15027|SC16A_HUMAN Protein transport protein Sec16A OS=Homo sapiens OX=9606 GN=SEC16A PE=1 SV=4;sp|O15027-5|SC16A_HUMAN Isoform 5 of Protein transport protein Sec16A OS=Homo sapiens OX=9606 GN=SEC16A;sp|O15027-2|SC16A_HUMAN Isoform 2 of Protein transpor	1	311	0	NaN	NaN	NaN	NaN	NaN	NaN	NaN	NaN	NaN	NaN	NaN	NaN	NaN	NaN	NaN	NaN	NaN
UID1257	S	4	___1	RS(0.546)S(0.161)S(0.263)DT(0.03)AAYPAGTTAVGTPGNGTPCSQDTSFSSSR	0.54578	2.39e-32	110.75	99.122	110.75	0.48127	29274000	220	NaN	NaN	NaN	NaN	NaN	0.54578	NaN	NaN	NaN	O15047	220	O15047	O15047	Histone-lysine N-methyltransferase SETD1A	SETD1A	QGSGAATETAESRRRSSSDTAAYPAGTTAVG	sp|O15047|SET1A_HUMAN Histone-lysine N-methyltransferase SETD1A OS=Homo sapiens OX=9606 GN=SETD1A PE=1 SV=3	1	318	0	NaN	NaN	NaN	NaN	NaN	NaN	NaN	NaN	NaN	NaN	NaN	NaN	NaN	NaN	NaN	NaN	NaN
UID1369	S	4	___1	AGAVALQALKGS(1)QDSSENDLVR	0.999854	1.19e-87	207.47	184.49	207.47	-0.45421	110370000	748	0	0	NaN	NaN	NaN	0.999854	NaN	NaN	0	O15195-2;O15195	748;762	O15195-2	O15195-2	Villin-like protein	VILL	GNGRAGAVALQALKGSQDSSENDLVRSPKSA	sp|O15195-2|VILL_HUMAN Isoform 2 of Villin-like protein OS=Homo sapiens OX=9606 GN=VILL;sp|O15195|VILL_HUMAN Villin-like protein OS=Homo sapiens OX=9606 GN=VILL PE=2 SV=3	1	346	0	NaN	NaN	NaN	NaN	NaN	NaN	NaN	NaN	NaN	NaN	NaN	NaN	NaN	NaN	NaN	NaN	NaN
UID1387	S	4	___1	RES(0.999)CGS(0.892)S(0.109)VLTDFEGK	0.892452	1.3e-30	161.22	143.64	161.22	0.07717	667680000	469	0.886558	0.889943	0.847236	0.687118	0.593089	0.883509	0.855301	0.892452	0.856749	O15231-3;O15231;O15231-6;O15231-7;O15231-8;O15231-2;O15231-9;O15231-4;O15231-5	469;468;500;439;471;231;106;409;247	O15231-3;O15231-4;O15231-5	O15231-3	Zinc finger protein 185	ZNF185	SPSGSEQLVRRESCGSSVLTDFEGKDVATKV	sp|O15231-3|ZN185_HUMAN Isoform 3 of Zinc finger protein 185 OS=Homo sapiens OX=9606 GN=ZNF185;sp|O15231|ZN185_HUMAN Zinc finger protein 185 OS=Homo sapiens OX=9606 GN=ZNF185 PE=1 SV=3;sp|O15231-6|ZN185_HUMAN Isoform 6 of Zinc finger protein 185 OS=Homo sa	1;2	352;353;354	0	NaN	NaN	NaN	NaN	NaN	NaN	NaN	NaN	NaN	NaN	NaN	NaN	NaN	NaN	NaN	NaN	NaN
UID1390	S	4	___1	GGQGDPAVPAQQPADPS(0.183)T(0.817)PERQS(0.643)S(0.296)PS(0.058)GS(0.003)EQLVR	0.64266	5.15e-50	140.38	121.33	140.38	0.10545	369270000	453	0.496505	0	NaN	0.499784	0.450035	0.515463	0	0.64266	0.498644	O15231-3;O15231;O15231-6;O15231-7;O15231-8;O15231-2;O15231-9;O15231-4;O15231-5	453;452;484;423;455;215;90;393;231	O15231-3;O15231-4;O15231-5	O15231-3	Zinc finger protein 185	ZNF185	VPAQQPADPSTPERQSSPSGSEQLVRRESCG	sp|O15231-3|ZN185_HUMAN Isoform 3 of Zinc finger protein 185 OS=Homo sapiens OX=9606 GN=ZNF185;sp|O15231|ZN185_HUMAN Zinc finger protein 185 OS=Homo sapiens OX=9606 GN=ZNF185 PE=1 SV=3;sp|O15231-6|ZN185_HUMAN Isoform 6 of Zinc finger protein 185 OS=Homo sa	1;2	352;353;354	0	NaN	NaN	NaN	NaN	NaN	NaN	NaN	NaN	NaN	NaN	NaN	NaN	NaN	NaN	NaN	NaN	NaN
UID1397	S	4	___1	RS(0.144)S(0.838)T(0.018)SGDT(1)EEEEEEEVVPFSSDEQKR	0.837694	1.29e-246	292.73	271.85	292.73	-0.11749	3225200000	153	0.40661	0.474892	0.639011	0.458489	0.773961	0.837694	0.474734	0.56788	0.482723	O15231-3;O15231;O15231-6;O15231-7;O15231-8;O15231-2;O15231-4;O15231-5	153;153;153;153;153;13;153;18	O15231-3;O15231-4;O15231-5	O15231-3	Zinc finger protein 185	ZNF185	TEDYKKLAPYNIRRSSTSGDTEEEEEEEVVP	sp|O15231-3|ZN185_HUMAN Isoform 3 of Zinc finger protein 185 OS=Homo sapiens OX=9606 GN=ZNF185;sp|O15231|ZN185_HUMAN Zinc finger protein 185 OS=Homo sapiens OX=9606 GN=ZNF185 PE=1 SV=3;sp|O15231-6|ZN185_HUMAN Isoform 6 of Zinc finger protein 185 OS=Homo sa	1;2;3	352;353;354	0	NaN	NaN	NaN	NaN	NaN	NaN	NaN	NaN	NaN	NaN	NaN	NaN	NaN	NaN	NaN	NaN	NaN
UID1402	S	3	___1	S(0.175)S(0.825)AQLSDGNVGSGATGSRPEGLAAVDIGSER	0.825071	7.49e-48	153.77	134.44	153.77	-0.33443	118130000	343	NaN	0.799434	0.499583	0	NaN	0.825071	0	NaN	NaN	O15231-3;O15231;O15231-6;O15231-7;O15231-8;O15231-4;O15231-5	343;342;342;313;313;283;121	O15231-3;O15231-4;O15231-5	O15231-3	Zinc finger protein 185	ZNF185	GEEAFRAPNTDAARSSAQLSDGNVGSGATGS	sp|O15231-3|ZN185_HUMAN Isoform 3 of Zinc finger protein 185 OS=Homo sapiens OX=9606 GN=ZNF185;sp|O15231|ZN185_HUMAN Zinc finger protein 185 OS=Homo sapiens OX=9606 GN=ZNF185 PE=1 SV=3;sp|O15231-6|ZN185_HUMAN Isoform 6 of Zinc finger protein 185 OS=Homo sa	1	352;353;354	0	NaN	NaN	NaN	NaN	NaN	NaN	NaN	NaN	NaN	NaN	NaN	NaN	NaN	NaN	NaN	NaN	NaN
UID1493	S	5	___1	LALSPEDKPIRLS(0.422)PS(0.578)K	0.578411	2.16e-05	114.04	97.939	93.684	0.21886	337980000	1138	NaN	0	0.500002	0.5	0.532298	0.578411	NaN	0.501074	NaN	O15417;O15417-2;O15417-3	1138;1138;74	O15417	O15417	Trinucleotide repeat-containing gene 18 protein	TNRC18	RLALSPEDKPIRLSPSKITEPLREGPEEEPL	sp|O15417|TNC18_HUMAN Trinucleotide repeat-containing gene 18 protein OS=Homo sapiens OX=9606 GN=TNRC18 PE=1 SV=3;sp|O15417-2|TNC18_HUMAN Isoform 2 of Trinucleotide repeat-containing gene 18 protein OS=Homo sapiens OX=9606 GN=TNRC18;sp|O15417-3|TNC18_HUMAN	1;2	379	0	NaN	NaN	NaN	NaN	NaN	NaN	NaN	NaN	NaN	NaN	NaN	NaN	NaN	NaN	NaN	NaN	NaN
UID1552	S	3	___1	GLDS(0.001)S(0.002)S(0.007)T(0.023)APS(0.966)ALGER	0.966436	0.0129209	53.3	36.089	53.3	1.0851	15242000	815	NaN	NaN	NaN	NaN	NaN	0.966436	NaN	NaN	NaN	O15534;O15534-4	815;799	O15534	O15534	Period circadian protein homolog 1	PER1	DLGRLRGLDSSSTAPSALGERGCHHGPAPPS	sp|O15534|PER1_HUMAN Period circadian protein homolog 1 OS=Homo sapiens OX=9606 GN=PER1 PE=1 SV=2;sp|O15534-4|PER1_HUMAN Isoform 2 of Period circadian protein homolog 1 OS=Homo sapiens OX=9606 GN=PER1	1	395	0	NaN	NaN	NaN	NaN	NaN	NaN	NaN	NaN	NaN	NaN	NaN	NaN	NaN	NaN	NaN	NaN	NaN
UID1638	S	3	___1	S(0.001)QCRNS(0.378)PS(0.621)NLSSSSDTGSVGGTYR	0.620795	4.13e-76	198.21	182.32	198.21	-0.72982	36847000	1151	NaN	NaN	NaN	NaN	0.620795	NaN	NaN	NaN	NaN	O43166-3;O43166-2;O43166	1151;1151;1151	O43166-3	O43166-3	Signal-induced proliferation-associated 1-like protein 1	SIPA1L1	VSSMALARSQCRNSPSNLSSSSDTGSVGGTY	sp|O43166-3|SI1L1_HUMAN Isoform 3 of Signal-induced proliferation-associated 1-like protein 1 OS=Homo sapiens OX=9606 GN=SIPA1L1;sp|O43166-2|SI1L1_HUMAN Isoform 2 of Signal-induced proliferation-associated 1-like protein 1 OS=Homo sapiens OX=9606 GN=SIPA1L	1	409	0	NaN	NaN	NaN	NaN	NaN	NaN	NaN	NaN	NaN	NaN	NaN	NaN	NaN	NaN	NaN	NaN	NaN
UID1647	S	3	___1	S(0.179)NS(0.803)DIT(0.018)ISELDVDSFDECISPTYK	0.802693	1.48e-18	127.15	115.07	127.15	-0.25311	59346000	176	NaN	NaN	0	NaN	0.802693	0	0.531083	0	NaN	O43166-3;O43166-2;O43166	176;176;176	O43166-3	O43166-3	Signal-induced proliferation-associated 1-like protein 1	SIPA1L1	SSPRKALRRIRQRSNSDITISELDVDSFDEC	sp|O43166-3|SI1L1_HUMAN Isoform 3 of Signal-induced proliferation-associated 1-like protein 1 OS=Homo sapiens OX=9606 GN=SIPA1L1;sp|O43166-2|SI1L1_HUMAN Isoform 2 of Signal-induced proliferation-associated 1-like protein 1 OS=Homo sapiens OX=9606 GN=SIPA1L	1	409	0	NaN	NaN	NaN	NaN	NaN	NaN	NaN	NaN	NaN	NaN	NaN	NaN	NaN	NaN	NaN	NaN	NaN
UID1653	S	3	___1	SSPVSQGS(0.001)S(0.024)VS(0.756)LNS(0.206)NDS(0.012)AMLK	0.756473	1.07e-05	77.391	61.269	77.391	0.3055	63378000	123	0	NaN	NaN	NaN	NaN	0.756473	NaN	NaN	0	O43166-3;O43166-2;O43166	123;123;123	O43166-3	O43166-3	Signal-induced proliferation-associated 1-like protein 1	SIPA1L1	SLSSKSSPVSQGSSVSLNSNDSAMLKSIQNT	sp|O43166-3|SI1L1_HUMAN Isoform 3 of Signal-induced proliferation-associated 1-like protein 1 OS=Homo sapiens OX=9606 GN=SIPA1L1;sp|O43166-2|SI1L1_HUMAN Isoform 2 of Signal-induced proliferation-associated 1-like protein 1 OS=Homo sapiens OX=9606 GN=SIPA1L	1	409	0	NaN	NaN	NaN	NaN	NaN	NaN	NaN	NaN	NaN	NaN	NaN	NaN	NaN	NaN	NaN	NaN	NaN
UID1700	S	3	___1	YDEELEGERPHS(1)FR	1	1.39e-05	107.98	93.936	105.9	-0.42141	346980000	348	1	NaN	0	1	1	1	NaN	1	0	O43290	348	O43290	O43290	U4/U6.U5 tri-snRNP-associated protein 1	SART1	ILSKYDEELEGERPHSFRLEQGGTADGLRER	sp|O43290|SNUT1_HUMAN U4/U6.U5 tri-snRNP-associated protein 1 OS=Homo sapiens OX=9606 GN=SART1 PE=1 SV=1	1	422	0	NaN	NaN	NaN	NaN	NaN	NaN	NaN	NaN	NaN	NaN	NaN	NaN	NaN	NaN	NaN	NaN	NaN
UID1725	S	4	___1	AWLLHSGPEGPGTLDTDDRS(0.908)EQEGS(0.074)T(0.018)LS(0.001)VISATSSAGR	0.907523	5.91e-135	203.96	190.71	203.96	-0.067975	47855000	267	NaN	NaN	NaN	0.855806	NaN	0.907523	NaN	NaN	NaN	O43299;O43299-3;O43299-2	267;111;267	O43299	O43299	AP-5 complex subunit zeta-1	AP5Z1	HSGPEGPGTLDTDDRSEQEGSTLSVISATSS	sp|O43299|AP5Z1_HUMAN AP-5 complex subunit zeta-1 OS=Homo sapiens OX=9606 GN=AP5Z1 PE=1 SV=2;sp|O43299-3|AP5Z1_HUMAN Isoform 3 of AP-5 complex subunit zeta-1 OS=Homo sapiens OX=9606 GN=AP5Z1;sp|O43299-2|AP5Z1_HUMAN Isoform 2 of AP-5 complex subunit zeta-1	1	427	0	NaN	NaN	NaN	NaN	NaN	NaN	NaN	NaN	NaN	NaN	NaN	NaN	NaN	NaN	NaN	NaN	NaN
UID1728	S	3	___1	DSEGFNS(1)PK	0.999995	0.00114063	85.963	61.172	85.963	0.50607	166450000	170	NaN	NaN	NaN	NaN	NaN	0.999995	0	NaN	0.999938	O43303-2;O43303	170;170	O43303-2	O43303-2	Centriolar coiled-coil protein of 110 kDa	CCP110	KTDGIDLARDSEGFNSPKQCDSSNISHVENE	sp|O43303-2|CP110_HUMAN Isoform 2 of Centriolar coiled-coil protein of 110 kDa OS=Homo sapiens OX=9606 GN=CCP110;sp|O43303|CP110_HUMAN Centriolar coiled-coil protein of 110 kDa OS=Homo sapiens OX=9606 GN=CCP110 PE=1 SV=3	1	429	0	NaN	NaN	NaN	NaN	NaN	NaN	NaN	NaN	NaN	NaN	NaN	NaN	NaN	NaN	NaN	NaN	NaN
UID1735	S	3	___1	RKDS(1)ILPER	1	0.00515529	69.714	29.137	50.222	-0.07653	500690000	328	1	0	1	1	1	NaN	1	0	0	O43310;O43310-2	328;328	O43310	O43310	CBP80/20-dependent translation initiation factor	CTIF	PQQSGGPEVETKRKDSILPERIGERPKITLL	sp|O43310|CTIF_HUMAN CBP80/20-dependent translation initiation factor OS=Homo sapiens OX=9606 GN=CTIF PE=1 SV=1;sp|O43310-2|CTIF_HUMAN Isoform 2 of CBP80/20-dependent translation initiation factor OS=Homo sapiens OX=9606 GN=CTIF	1	432	0	NaN	NaN	NaN	NaN	NaN	NaN	NaN	NaN	NaN	NaN	NaN	NaN	NaN	NaN	NaN	NaN	NaN
UID1782	S	4	___1	DQSPPEDS(0.014)GES(0.187)EADLECS(0.187)FAAIHS(0.612)PAPPPDPAPR	0.612113	0.000137523	55.101	48.303	48.388	0.65811	16400000	1008	0.462937	NaN	NaN	NaN	NaN	0.612113	NaN	NaN	0	O43379;O43379-4	1008;1008	O43379	O43379	WD repeat-containing protein 62	WDR62	GESEADLECSFAAIHSPAPPPDPAPRFATSL	sp|O43379|WDR62_HUMAN WD repeat-containing protein 62 OS=Homo sapiens OX=9606 GN=WDR62 PE=1 SV=4;sp|O43379-4|WDR62_HUMAN Isoform 4 of WD repeat-containing protein 62 OS=Homo sapiens OX=9606 GN=WDR62	1	439	0	NaN	NaN	NaN	NaN	NaN	NaN	NaN	NaN	NaN	NaN	NaN	NaN	NaN	NaN	NaN	NaN	NaN
UID1832	S	3	___1	LVLS(1)GEKK	1	0.00682179	98.048	31.778	46.844	0.083393	1166700000	240	1	1	0	NaN	NaN	1	1	NaN	1	O43432;O43432-3;O43432-2	240;246;251	O43432	O43432	Eukaryotic translation initiation factor 4 gamma 3	EIF4G3	DPVLKSPSPVLRLVLSGEKKEQEGQTSETTA	sp|O43432|IF4G3_HUMAN Eukaryotic translation initiation factor 4 gamma 3 OS=Homo sapiens OX=9606 GN=EIF4G3 PE=1 SV=2;sp|O43432-3|IF4G3_HUMAN Isoform 3 of Eukaryotic translation initiation factor 4 gamma 3 OS=Homo sapiens OX=9606 GN=EIF4G3;sp|O43432-2|IF4G3	1	446	0	NaN	NaN	NaN	NaN	NaN	NaN	NaN	NaN	NaN	NaN	NaN	NaN	NaN	NaN	NaN	NaN	NaN
UID1835	S	2	___1	S(0.093)PS(0.907)PVLR	0.907336	0.00710797	105.94	49.277	105.94	0.018138	4301700000	232	0	NaN	0.82336	NaN	0.907336	0	NaN	0	0.710144	O43432;O43432-3;O43432-2	232;238;243	O43432	O43432	Eukaryotic translation initiation factor 4 gamma 3	EIF4G3	KQEEKPKPDPVLKSPSPVLRLVLSGEKKEQE	sp|O43432|IF4G3_HUMAN Eukaryotic translation initiation factor 4 gamma 3 OS=Homo sapiens OX=9606 GN=EIF4G3 PE=1 SV=2;sp|O43432-3|IF4G3_HUMAN Isoform 3 of Eukaryotic translation initiation factor 4 gamma 3 OS=Homo sapiens OX=9606 GN=EIF4G3;sp|O43432-2|IF4G3	1	446	0	NaN	NaN	NaN	NaN	NaN	NaN	NaN	NaN	NaN	NaN	NaN	NaN	NaN	NaN	NaN	NaN	NaN
UID1893	S	3	___1	AALQTAPES(0.999)ADDS(0.001)PSQLSK	0.998535	2.69e-09	122.01	92.873	122.01	0.18162	139900000	280	NaN	0	0	0.997767	0.998535	0	NaN	NaN	NaN	O43524;O43524-2	280;60	O43524	O43524	Forkhead box protein O3	FOXO3	GRAAKKKAALQTAPESADDSPSQLSKWPGSP	sp|O43524|FOXO3_HUMAN Forkhead box protein O3 OS=Homo sapiens OX=9606 GN=FOXO3 PE=1 SV=1;sp|O43524-2|FOXO3_HUMAN Isoform 2 of Forkhead box protein O3 OS=Homo sapiens OX=9606 GN=FOXO3	1;2	463	0	NaN	NaN	NaN	NaN	NaN	NaN	NaN	NaN	NaN	NaN	NaN	NaN	NaN	NaN	NaN	NaN	NaN
UID1898	S	3	___1	AGSAMAIGGGGGS(0.909)GT(0.09)LGSGLLLEDSAR	0.909368	7.54e-11	88.688	68.433	88.688	-0.28325	74887000	85	NaN	NaN	NaN	NaN	0	0.909368	0.571173	NaN	NaN	O43524	85	O43524	O43524	Forkhead box protein O3	FOXO3	GGRAGSAMAIGGGGGSGTLGSGLLLEDSARV	sp|O43524|FOXO3_HUMAN Forkhead box protein O3 OS=Homo sapiens OX=9606 GN=FOXO3 PE=1 SV=1	1	463	0	NaN	NaN	NaN	NaN	NaN	NaN	NaN	NaN	NaN	NaN	NaN	NaN	NaN	NaN	NaN	NaN	NaN
UID1944	S	3	___1	MPS(0.961)ES(0.039)AAQSLAVALPLQTK	0.960535	3.63e-43	161.51	140.5	153.14	0.24566	198230000	110	NaN	NaN	0.846757	0	0.736802	0.893715	0.778906	0.791851	0.960535	O43660-2;O43660	110;119	O43660-2	O43660-2	Pleiotropic regulator 1	PLRG1	AGVALTADTKIQRMPSESAAQSLAVALPLQT	sp|O43660-2|PLRG1_HUMAN Isoform 2 of Pleiotropic regulator 1 OS=Homo sapiens OX=9606 GN=PLRG1;sp|O43660|PLRG1_HUMAN Pleiotropic regulator 1 OS=Homo sapiens OX=9606 GN=PLRG1 PE=1 SV=1	1	479	0	NaN	NaN	NaN	NaN	NaN	NaN	NaN	NaN	NaN	NaN	NaN	NaN	NaN	NaN	NaN	NaN	NaN
UID2041	S	3	___1	S(0.037)T(0.037)CS(0.926)CPDLQPNGQDLGENSR	0.925802	3.5e-08	92.518	81.461	91.416	-0.18457	124280000	61	NaN	NaN	NaN	0.906325	NaN	0.925802	0.91991	0.906528	0.916441	O43847;O43847-2	61;61	O43847	O43847	Nardilysin	NRD1	PILAMPGRNKAKSTCSCPDLQPNGQDLGENS	sp|O43847|NRDC_HUMAN Nardilysin OS=Homo sapiens OX=9606 GN=NRDC PE=1 SV=3;sp|O43847-2|NRDC_HUMAN Isoform 2 of Nardilysin OS=Homo sapiens OX=9606 GN=NRDC	1	506	0	NaN	NaN	NaN	NaN	NaN	NaN	NaN	NaN	NaN	NaN	NaN	NaN	NaN	NaN	NaN	NaN	NaN
UID2055	S	3	___1	S(0.463)WS(0.537)AGPVTAPLAASTASFSAVK	0.536812	1.38e-11	112.48	95.257	112.48	0.11925	19496000	302	0.521009	NaN	NaN	NaN	NaN	0.536812	NaN	NaN	NaN	O43900-2;O43900	302;383	O43900-2	O43900-2	Prickle-like protein 3	PRICKLE3	LGSEPTAPGPSRRSWSAGPVTAPLAASTASF	sp|O43900-2|PRIC3_HUMAN Isoform 2 of Prickle planar cell polarity protein 3 OS=Homo sapiens OX=9606 GN=PRICKLE3;sp|O43900|PRIC3_HUMAN Prickle planar cell polarity protein 3 OS=Homo sapiens OX=9606 GN=PRICKLE3 PE=1 SV=2	1	510	0	NaN	NaN	NaN	NaN	NaN	NaN	NaN	NaN	NaN	NaN	NaN	NaN	NaN	NaN	NaN	NaN	NaN
UID2083	S	4	___1	IS(0.002)T(0.017)S(0.974)NGS(0.007)PGFEYHQPGDKFEASK	0.974003	1.36e-119	228.46	205.31	228.46	-0.087149	126330000	635	NaN	NaN	NaN	NaN	0.974003	NaN	NaN	NaN	NaN	O60229-5;O60229-6;O60229-4;O60229	635;565;597;2294	O60229-5	O60229-5	Kalirin	KALRN	GSSYNPPLPPLKISTSNGSPGFEYHQPGDKF	sp|O60229-5|KALRN_HUMAN Isoform 5 of Kalirin OS=Homo sapiens OX=9606 GN=KALRN;sp|O60229-6|KALRN_HUMAN Isoform 6 of Kalirin OS=Homo sapiens OX=9606 GN=KALRN;sp|O60229-4|KALRN_HUMAN Isoform 4 of Kalirin OS=Homo sapiens OX=9606 GN=KALRN;sp|O60229|KALRN_HUMAN	1	516	0	NaN	NaN	NaN	NaN	NaN	NaN	NaN	NaN	NaN	NaN	NaN	NaN	NaN	NaN	NaN	NaN	NaN
UID2105	S	3	___1	EGAGS(1)PAAPGTLPLEK	0.999953	0.000349696	81.723	49.661	81.723	-1.3746	101330000	37	0	0.999659	NaN	NaN	NaN	0.999953	0	NaN	NaN	O60248-2;O60248	37;37	O60248-2	O60248-2	Protein SOX-15	SOX15	AASSSSGPQEREGAGSPAAPGTLPLEKVKRP	sp|O60248-2|SOX15_HUMAN Isoform 2 of Protein SOX-15 OS=Homo sapiens OX=9606 GN=SOX15;sp|O60248|SOX15_HUMAN Protein SOX-15 OS=Homo sapiens OX=9606 GN=SOX15 PE=1 SV=1	1	520	0	NaN	NaN	NaN	NaN	NaN	NaN	NaN	NaN	NaN	NaN	NaN	NaN	NaN	NaN	NaN	NaN	NaN
UID2134	S	3	___1	GGET(1)PGS(1)EQWK	1	4.25e-05	110.66	49.308	81.703	-0.23709	25494000	229	NaN	NaN	NaN	1	NaN	0.618463	1	0	0	O60271;O60271-3;O60271-4;O60271-2;O60271-9;O60271-5	229;229;229;229;86;229	O60271;O60271-4	O60271	C-Jun-amino-terminal kinase-interacting protein 4	SPAG9	GLLTPDAQKGGETPGSEQWKFQELSQPRSHT	sp|O60271|JIP4_HUMAN C-Jun-amino-terminal kinase-interacting protein 4 OS=Homo sapiens OX=9606 GN=SPAG9 PE=1 SV=4;sp|O60271-3|JIP4_HUMAN Isoform 3 of C-Jun-amino-terminal kinase-interacting protein 4 OS=Homo sapiens OX=9606 GN=SPAG9;sp|O60271-4|JIP4_HUMAN	1;2	525;526	0	NaN	NaN	NaN	NaN	NaN	NaN	NaN	NaN	NaN	NaN	NaN	NaN	NaN	NaN	NaN	NaN	NaN
UID2156	S	3	___1	AAS(0.004)IENVLQDS(0.997)S(0.999)PEHCGR	0.997263	6.46e-33	167.73	148.43	50.539	0.27942	231090000	501	NaN	NaN	NaN	NaN	NaN	0.5	0.997263	0	NaN	O60291-4;O60291;O60291-3;O60291-2	501;523;501;523	O60291-4	O60291-4	E3 ubiquitin-protein ligase MGRN1	MGRN1	QQGTRAASIENVLQDSSPEHCGRGPPADIYL	sp|O60291-4|MGRN1_HUMAN Isoform 4 of E3 ubiquitin-protein ligase MGRN1 OS=Homo sapiens OX=9606 GN=MGRN1;sp|O60291|MGRN1_HUMAN E3 ubiquitin-protein ligase MGRN1 OS=Homo sapiens OX=9606 GN=MGRN1 PE=1 SV=2;sp|O60291-3|MGRN1_HUMAN Isoform 3 of E3 ubiquitin-pro	1;2	532	0	NaN	NaN	NaN	NaN	NaN	NaN	NaN	NaN	NaN	NaN	NaN	NaN	NaN	NaN	NaN	NaN	NaN
UID2225	S	3	___1	NFS(1)AASALNFPFAR	0.999726	8.62e-05	87.411	67.175	87.411	0.36901	9452000	66	0	NaN	NaN	NaN	0.999726	NaN	NaN	NaN	NaN	O60307	66	O60307	O60307	Microtubule-associated serine/threonine-protein kinase 3	MAST3	VPTAGSSPLDSPRNFSAASALNFPFARRADG	sp|O60307|MAST3_HUMAN Microtubule-associated serine/threonine-protein kinase 3 OS=Homo sapiens OX=9606 GN=MAST3 PE=1 SV=2	1	539	0	NaN	NaN	NaN	NaN	NaN	NaN	NaN	NaN	NaN	NaN	NaN	NaN	NaN	NaN	NaN	NaN	NaN
UID2264	S	3	___1	EDGGTLGVFS(1)PK	0.999971	0.00191588	68.751	47.849	68.751	-0.61877	50430000	481	0	NaN	0.999966	NaN	NaN	0.999971	NaN	0	0	O60333-2;O60333;O60333-4;O60333-3;Q12756;Q12756-3;Q12756-2	481;527;527;481;487;496;496	O60333-2;O60333-3;Q12756	O60333-2	Kinesin-like protein KIF1B;Kinesin-like protein KIF1A	KIF1B;KIF1A	MGVAIREDGGTLGVFSPKKTPHLVNLNEDPL;MGVAMREDGGTLGVFSPKKTPHLVNLNEDPL	sp|O60333-2|KIF1B_HUMAN Isoform 2 of Kinesin-like protein KIF1B OS=Homo sapiens OX=9606 GN=KIF1B;sp|O60333|KIF1B_HUMAN Kinesin-like protein KIF1B OS=Homo sapiens OX=9606 GN=KIF1B PE=1 SV=5;sp|O60333-4|KIF1B_HUMAN Isoform 4 of Kinesin-like protein KIF1B OS=	1	542;543;2596	0	NaN	NaN	NaN	NaN	NaN	NaN	NaN	NaN	NaN	NaN	NaN	NaN	NaN	NaN	NaN	NaN	NaN
UID2292	S	3	___1	QS(0.708)S(0.2)S(0.092)EQCSDGEGR	0.707821	0.000130412	90.444	74.873	87.088	0.54881	32403000	672	0	0.497432	NaN	0.474379	0.707821	0.566396	0.485277	0.425299	0	O60343-2	672	O60343-2	O60343-2	TBC1 domain family member 4	TBC1D4	QDGRAQGVRSPLLRQSSSEQCSDGEGRKRTS	sp|O60343-2|TBCD4_HUMAN Isoform 2 of TBC1 domain family member 4 OS=Homo sapiens OX=9606 GN=TBC1D4	1	546	0	NaN	NaN	NaN	NaN	NaN	NaN	NaN	NaN	NaN	NaN	NaN	NaN	NaN	NaN	NaN	NaN	NaN
UID2344	S	3	___1	VQKES(0.999)QAT(0.001)LEER	0.999162	0.000283358	87.668	67.287	87.668	0.25887	162490000	6	0	NaN	NaN	NaN	0.999162	0	0	0	0	O60502;O60502-3;O60502-4;O60502-2	6;6;6;6	O60502	O60502	Protein O-GlcNAcase	MGEA5	__________MVQKESQATLEERESELSSNP	sp|O60502|OGA_HUMAN Protein O-GlcNAcase OS=Homo sapiens OX=9606 GN=OGA PE=1 SV=2;sp|O60502-3|OGA_HUMAN Isoform 3 of Protein O-GlcNAcase OS=Homo sapiens OX=9606 GN=OGA;sp|O60502-4|OGA_HUMAN Isoform 4 of Protein O-GlcNAcase OS=Homo sapiens OX=9606 GN=OGA;sp|	1	559	0	NaN	NaN	NaN	NaN	NaN	NaN	NaN	NaN	NaN	NaN	NaN	NaN	NaN	NaN	NaN	NaN	NaN
UID2369	S	3	___1	LAS(1)KEESSNSSDSK	0.999945	2.84e-05	102.39	80.272	102.39	0.055561	246360000	756	NaN	NaN	NaN	0.972308	0.999945	0	NaN	NaN	0	O60524-4;O60524-5;O60524-3;O60524	756;773;777;798	O60524-4	O60524-4	Nuclear export mediator factor NEMF	NEMF	DLSHLQPQRSIQKLASKEESSNSSDSKSQSR	sp|O60524-4|NEMF_HUMAN Isoform 4 of Nuclear export mediator factor NEMF OS=Homo sapiens OX=9606 GN=NEMF;sp|O60524-5|NEMF_HUMAN Isoform 5 of Nuclear export mediator factor NEMF OS=Homo sapiens OX=9606 GN=NEMF;sp|O60524-3|NEMF_HUMAN Isoform 3 of Nuclear expo	1	565	0	NaN	NaN	NaN	NaN	NaN	NaN	NaN	NaN	NaN	NaN	NaN	NaN	NaN	NaN	NaN	NaN	NaN
UID2393	S	4	___1	QTIMETLEQGPAQAS(0.796)PS(0.11)Y(0.094)VPLFK	0.795961	1.34e-12	112.54	85.488	112.54	-0.29287	25976000	723	0	0.346227	NaN	0.346264	0.771301	0.795961	0.333333	0.341966	0.682998	O60645	723	O60645	O60645	Exocyst complex component 3	EXOC3	KQTIMETLEQGPAQASPSYVPLFKDIVVPSL	sp|O60645|EXOC3_HUMAN Exocyst complex component 3 OS=Homo sapiens OX=9606 GN=EXOC3 PE=1 SV=3	1	576	0	NaN	NaN	NaN	NaN	NaN	NaN	NaN	NaN	NaN	NaN	NaN	NaN	NaN	NaN	NaN	NaN	NaN
UID2427	S	3	___1	HYEDGY(0.015)PGGS(0.983)DNYGS(0.002)LSR	0.982875	4.65e-08	126.93	118.45	79.69	-0.27449	424110000	225	NaN	0	0	0	0	0.982875	0	0.790862	0	O60716-5;O60716-3;O60716-21;O60716-19;O60716-13;O60716-11;O60716-2;O60716;O60716-18;O60716-17;O60716-10;O60716-9;O60716-8;O60716-7;O60716-24;O60716-23;O60716-16;O60716-15;O60716-6;O60716-4;O60716-22;O60716-20;O60716-14;O60716-12	225;225;124;124;171;171;225;225;124;124;171;171;225;225;124;124;171;171;225;225;124;124;171;171	O60716-5;O60716-8	O60716-5	Catenin delta-1	CTNND1	PDGYSRHYEDGYPGGSDNYGSLSRVTRIEER	sp|O60716-5|CTND1_HUMAN Isoform 1A of Catenin delta-1 OS=Homo sapiens OX=9606 GN=CTNND1;sp|O60716-3|CTND1_HUMAN Isoform 1AC of Catenin delta-1 OS=Homo sapiens OX=9606 GN=CTNND1;sp|O60716-21|CTND1_HUMAN Isoform 3A of Catenin delta-1 OS=Homo sapiens OX=9606	1;2	585;586	0	NaN	NaN	NaN	NaN	NaN	NaN	NaN	NaN	NaN	NaN	NaN	NaN	NaN	NaN	NaN	NaN	NaN
UID2502	S	3	___1	KWDGS(0.04)EEDEDNS(0.96)K	0.960231	4.98e-05	101.6	77.404	101.6	-0.10041	8850000000	171	0	0.793325	0	0	0.960231	0	0	0	0	O60841	171	O60841	O60841	Eukaryotic translation initiation factor 5B	EIF5B	KSNKKWDGSEEDEDNSKKIKERSRINSSGES	sp|O60841|IF2P_HUMAN Eukaryotic translation initiation factor 5B OS=Homo sapiens OX=9606 GN=EIF5B PE=1 SV=4	1	597	0	NaN	NaN	NaN	NaN	NaN	NaN	NaN	NaN	NaN	NaN	NaN	NaN	NaN	NaN	NaN	NaN	NaN
UID2504	S	4	___1	LLQAQGVEVPS(0.157)KDS(0.843)LPK	0.842521	1.45e-15	139.11	118.17	115.46	0.093132	169120000	438	0	NaN	0.727474	NaN	0.718321	0.842521	NaN	0.626929	NaN	O60841	438	O60841	O60841	Eukaryotic translation initiation factor 5B	EIF5B	LKLLQAQGVEVPSKDSLPKKRPIYEDKKRKK	sp|O60841|IF2P_HUMAN Eukaryotic translation initiation factor 5B OS=Homo sapiens OX=9606 GN=EIF5B PE=1 SV=4	1	597	0	NaN	NaN	NaN	NaN	NaN	NaN	NaN	NaN	NaN	NaN	NaN	NaN	NaN	NaN	NaN	NaN	NaN
UID2648	S	3	___1	IS(0.981)LNS(0.019)LCYGDMDK	0.981107	8.4e-06	111.58	88.129	68.123	-0.18498	155930000	197	0	0.980157	0.94593	NaN	0.981107	0	NaN	NaN	0.963985	O75131	197	O75131	O75131	Copine-3	CPNE3	VVKNNLNPVWRPFKISLNSLCYGDMDKTIKV	sp|O75131|CPNE3_HUMAN Copine-3 OS=Homo sapiens OX=9606 GN=CPNE3 PE=1 SV=1	1	629	0	NaN	NaN	NaN	NaN	NaN	NaN	NaN	NaN	NaN	NaN	NaN	NaN	NaN	NaN	NaN	NaN	NaN
UID2680	S	4	___1	AVRPEVNT(0.002)VAS(0.999)S(1)DEVCDGDREK	0.99966	1.81e-85	208.96	184.69	91.583	0.19793	476020000	459	0.990451	NaN	NaN	0.999595	0.587796	0.999132	NaN	NaN	0.99966	O75151	459	O75151	O75151	Lysine-specific demethylase PHF2	PHF2	NASKAVRPEVNTVASSDEVCDGDREKEEPPS	sp|O75151|PHF2_HUMAN Lysine-specific demethylase PHF2 OS=Homo sapiens OX=9606 GN=PHF2 PE=1 SV=4	1;2	637	0	NaN	NaN	NaN	NaN	NaN	NaN	NaN	NaN	NaN	NaN	NaN	NaN	NaN	NaN	NaN	NaN	NaN
UID2728	S	4	___1	VCLEIPQEVS(0.37)QS(0.63)ELFPK	0.629921	0.000265006	80.156	58.558	80.156	-0.25006	36603000	412	NaN	0	0.5	NaN	0.629921	NaN	0	NaN	0.5	O75164	412	O75164	O75164	Lysine-specific demethylase 4A	KDM4A	KRHRVCLEIPQEVSQSELFPKEDLSSEQYEM	sp|O75164|KDM4A_HUMAN Lysine-specific demethylase 4A OS=Homo sapiens OX=9606 GN=KDM4A PE=1 SV=2	1	643	0	NaN	NaN	NaN	NaN	NaN	NaN	NaN	NaN	NaN	NaN	NaN	NaN	NaN	NaN	NaN	NaN	NaN
UID2730	S	3	___1	AS(0.002)AS(0.299)PS(0.67)T(0.028)S(0.001)STSSRPK	0.669919	6.21e-17	145.43	124.96	124.84	-0.14248	538340000	239	0	NaN	0	NaN	0.669919	0.45242	0	NaN	0	O75167;O75167-4;O75167-5;O75167-2	239;250;159;170	O75167	O75167	Phosphatase and actin regulator 2	PHACTR2	SHSKKTTGSKASASPSTSSTSSRPKASKETV	sp|O75167|PHAR2_HUMAN Phosphatase and actin regulator 2 OS=Homo sapiens OX=9606 GN=PHACTR2 PE=1 SV=2;sp|O75167-4|PHAR2_HUMAN Isoform 4 of Phosphatase and actin regulator 2 OS=Homo sapiens OX=9606 GN=PHACTR2;sp|O75167-5|PHAR2_HUMAN Isoform 5 of Phosphatase	1	644	0	NaN	NaN	NaN	NaN	NaN	NaN	NaN	NaN	NaN	NaN	NaN	NaN	NaN	NaN	NaN	NaN	NaN
UID2751	S	3	___1	S(0.998)DNHS(0.002)PAVVTTTVSSK	0.998405	7.18e-08	126.51	119.31	126.51	0.054408	217940000	1384	NaN	NaN	0	0.783941	NaN	0.969034	0.945791	NaN	0.998405	O75179-6;O75179-2;O75179;O75179-4;O75179-7	1384;1634;1635;1042;1522	O75179-6	O75179-6	Ankyrin repeat domain-containing protein 17	ANKRD17	SSCSDESSNSNSSRKSDNHSPAVVTTTVSSK	sp|O75179-6|ANR17_HUMAN Isoform 6 of Ankyrin repeat domain-containing protein 17 OS=Homo sapiens OX=9606 GN=ANKRD17;sp|O75179-2|ANR17_HUMAN Isoform 2 of Ankyrin repeat domain-containing protein 17 OS=Homo sapiens OX=9606 GN=ANKRD17;sp|O75179|ANR17_HUMAN An	1	648	0	NaN	NaN	NaN	NaN	NaN	NaN	NaN	NaN	NaN	NaN	NaN	NaN	NaN	NaN	NaN	NaN	NaN
UID2818	S	3	___1	S(0.806)S(0.161)T(0.033)ETCYSAIPK	0.805797	1.87e-37	212.1	177.92	138.35	0.020552	106650000	2527	0.494959	NaN	0.667378	NaN	0.805797	0.464948	NaN	NaN	NaN	O75369-8;O75369-2;O75369-9;O75369;O75369-6;O75369-3;O75369-7	2527;2472;2485;2496;2431;2455;2316	O75369-8	O75369-8	Filamin-B	FLNB	SANETSSILVESVTRSSTETCYSAIPKASSD	sp|O75369-8|FLNB_HUMAN Isoform 8 of Filamin-B OS=Homo sapiens OX=9606 GN=FLNB;sp|O75369-2|FLNB_HUMAN Isoform 2 of Filamin-B OS=Homo sapiens OX=9606 GN=FLNB;sp|O75369-9|FLNB_HUMAN Isoform 9 of Filamin-B OS=Homo sapiens OX=9606 GN=FLNB;sp|O75369|FLNB_HUMAN F	1	667	0	NaN	NaN	NaN	NaN	NaN	NaN	NaN	NaN	NaN	NaN	NaN	NaN	NaN	NaN	NaN	NaN	NaN
UID2836	S	4	___1	MLS(0.02)S(0.539)T(0.435)PPT(0.006)PIACAPSAVNQAAPHQQNR	0.539058	2.9e-26	129.01	111.93	115.5	-0.045631	33287000	2395	0.45623	NaN	0.375418	NaN	NaN	0.539058	NaN	0.495426	0.31476	O75376;O75376-2	2395;2292	O75376	O75376	Nuclear receptor corepressor 1	NCOR1	STQFPYNPLTMRMLSSTPPTPIACAPSAVNQ	sp|O75376|NCOR1_HUMAN Nuclear receptor corepressor 1 OS=Homo sapiens OX=9606 GN=NCOR1 PE=1 SV=2;sp|O75376-2|NCOR1_HUMAN Isoform 2 of Nuclear receptor corepressor 1 OS=Homo sapiens OX=9606 GN=NCOR1	1	668	0	NaN	NaN	NaN	NaN	NaN	NaN	NaN	NaN	NaN	NaN	NaN	NaN	NaN	NaN	NaN	NaN	NaN
UID2843	S	3	___1	QLS(0.683)PT(0.317)PGYPSQYQLYAMENTR	0.683135	3.23e-10	101.66	85.434	101.66	0.66321	95533000	1592	0	NaN	NaN	NaN	NaN	0.683135	NaN	NaN	NaN	O75376;O75376-2	1592;1608	O75376	O75376	Nuclear receptor corepressor 1	NCOR1	ALDPAAAAYLFQRQLSPTPGYPSQYQLYAME	sp|O75376|NCOR1_HUMAN Nuclear receptor corepressor 1 OS=Homo sapiens OX=9606 GN=NCOR1 PE=1 SV=2;sp|O75376-2|NCOR1_HUMAN Isoform 2 of Nuclear receptor corepressor 1 OS=Homo sapiens OX=9606 GN=NCOR1	1	668	0	NaN	NaN	NaN	NaN	NaN	NaN	NaN	NaN	NaN	NaN	NaN	NaN	NaN	NaN	NaN	NaN	NaN
UID2948	S	2	___1	LLS(0.239)S(0.761)NEDDANILSSPTDR	0.761366	2.3e-189	287	235.13	287	0.16092	106430000	850	NaN	NaN	NaN	0.598351	0.529534	0.761366	NaN	NaN	NaN	O75448-2;O75448	850;863	O75448-2	O75448-2	Mediator of RNA polymerase II transcription subunit 24	MED24	PLDDVQPSKLMRLLSSNEDDANILSSPTDRS	sp|O75448-2|MED24_HUMAN Isoform 2 of Mediator of RNA polymerase II transcription subunit 24 OS=Homo sapiens OX=9606 GN=MED24;sp|O75448|MED24_HUMAN Mediator of RNA polymerase II transcription subunit 24 OS=Homo sapiens OX=9606 GN=MED24 PE=1 SV=1	1;2	687	0	NaN	NaN	NaN	NaN	NaN	NaN	NaN	NaN	NaN	NaN	NaN	NaN	NaN	NaN	NaN	NaN	NaN
UID2963	S	4	___1	KPS(0.5)S(0.5)EERETEISLK	0.499972	1.66e-05	106.7	58.08	106.7	-0.034452	43365000	513	NaN	NaN	NaN	NaN	NaN	0.499972	NaN	NaN	0.499294	O75475	513	O75475	O75475	PC4 and SFRS1-interacting protein	PSIP1	EDSKDNHEASTKKKPSSEERETEISLKDSTL	sp|O75475|PSIP1_HUMAN PC4 and SFRS1-interacting protein OS=Homo sapiens OX=9606 GN=PSIP1 PE=1 SV=1	1	690	0	NaN	NaN	NaN	NaN	NaN	NaN	NaN	NaN	NaN	NaN	NaN	NaN	NaN	NaN	NaN	NaN	NaN
UID2964	S	4	___1	KPS(0.5)S(0.5)EERETEISLK	0.499972	1.66e-05	106.7	58.08	106.7	-0.034452	43365000	514	NaN	NaN	NaN	NaN	NaN	0.499972	NaN	NaN	0.499294	O75475	514	O75475	O75475	PC4 and SFRS1-interacting protein	PSIP1	DSKDNHEASTKKKPSSEERETEISLKDSTLD	sp|O75475|PSIP1_HUMAN PC4 and SFRS1-interacting protein OS=Homo sapiens OX=9606 GN=PSIP1 PE=1 SV=1	1	690	0	NaN	NaN	NaN	NaN	NaN	NaN	NaN	NaN	NaN	NaN	NaN	NaN	NaN	NaN	NaN	NaN	NaN
UID2979	S	4	___1	S(0.96)RS(0.076)HS(0.964)DNDRFK	0.963708	0.000613223	108.35	90.762	43.791	-0.17754	48703000	160	NaN	NaN	0	NaN	0.595567	NaN	0.963708	0	NaN	O75494;O75494-2	160;159	O75494	O75494	Serine/arginine-rich splicing factor 10	SRSF10	RNSRPTGRPRRSRSHSDNDRFKHRNRSFSRS	sp|O75494|SRS10_HUMAN Serine/arginine-rich splicing factor 10 OS=Homo sapiens OX=9606 GN=SRSF10 PE=1 SV=1;sp|O75494-2|SRS10_HUMAN Isoform 2 of Serine/arginine-rich splicing factor 10 OS=Homo sapiens OX=9606 GN=SRSF10	1;2	693	0	NaN	NaN	NaN	NaN	NaN	NaN	NaN	NaN	NaN	NaN	NaN	NaN	NaN	NaN	NaN	NaN	NaN
UID3028	S	3	___1	AYS(1)FCGTIEYMAPDIVR	0.99996	9.46e-08	124.2	107.13	124.2	-0.22467	207780000	212	0.992978	0.997106	0	NaN	0.99996	0.999349	0.995342	0.998978	0.99978	O75582-2;O75582-3;O75582	212;133;212	O75582-2	O75582-2	Ribosomal protein S6 kinase alpha-5	RPS6KA5	GLSKEFVADETERAYSFCGTIEYMAPDIVRG	sp|O75582-2|KS6A5_HUMAN Isoform 2 of Ribosomal protein S6 kinase alpha-5 OS=Homo sapiens OX=9606 GN=RPS6KA5;sp|O75582-3|KS6A5_HUMAN Isoform 3 of Ribosomal protein S6 kinase alpha-5 OS=Homo sapiens OX=9606 GN=RPS6KA5;sp|O75582|KS6A5_HUMAN Ribosomal protein	1	709	0	NaN	NaN	NaN	NaN	NaN	NaN	NaN	NaN	NaN	NaN	NaN	NaN	NaN	NaN	NaN	NaN	NaN
UID3045	S	4	___1	IPGS(1)PAVTAASSNTDMTYGGLASPK	0.999543	9.3e-06	76.31	59.748	60.993	0.3207	111170000	2334	0.999213	0	NaN	NaN	NaN	0.999543	NaN	0.998652	0.99325	O75592-2;O75592	2334;2334	O75592-2	O75592-2	E3 ubiquitin-protein ligase MYCBP2	MYCBP2	SLQQDQAKKPQRIPGSPAVTAASSNTDMTYG	sp|O75592-2|MYCB2_HUMAN Isoform 2 of E3 ubiquitin-protein ligase MYCBP2 OS=Homo sapiens OX=9606 GN=MYCBP2;sp|O75592|MYCB2_HUMAN E3 ubiquitin-protein ligase MYCBP2 OS=Homo sapiens OX=9606 GN=MYCBP2 PE=1 SV=4	1	710	0	NaN	NaN	NaN	NaN	NaN	NaN	NaN	NaN	NaN	NaN	NaN	NaN	NaN	NaN	NaN	NaN	NaN
UID3072	S	3	___1	HSLSIPPVS(0.128)S(0.872)PPEQK	0.872332	1.57e-09	106.87	91.6	83.894	-0.34204	55264000	749	0.499977	NaN	0.798112	0.840043	0.499968	0.844869	0.872332	0.848361	NaN	O75665-3;O75665	749;789	O75665-3	O75665-3	Oral-facial-digital syndrome 1 protein	OFD1	SPTESRHSLSIPPVSSPPEQKVGLYRRQTEL	sp|O75665-3|OFD1_HUMAN Isoform 3 of Oral-facial-digital syndrome 1 protein OS=Homo sapiens OX=9606 GN=OFD1;sp|O75665|OFD1_HUMAN Oral-facial-digital syndrome 1 protein OS=Homo sapiens OX=9606 GN=OFD1 PE=1 SV=1	1	715	0	NaN	NaN	NaN	NaN	NaN	NaN	NaN	NaN	NaN	NaN	NaN	NaN	NaN	NaN	NaN	NaN	NaN
UID3093	S	3	___1	S(0.973)S(0.078)PPLRT(0.939)PDVLES(0.007)S(0.002)GPAVR	0.973415	1.26e-17	146.91	113.93	115.81	0.037328	3483500000	675	NaN	0	0.718931	0.973415	0.898345	0.49943	0.735843	NaN	0.756039	O75676-2;O75676	675;681	O75676-2	O75676-2	Ribosomal protein S6 kinase alpha-4	RPS6KA4	EGLRGSSWLQDGSARSSPPLRTPDVLESSGP	sp|O75676-2|KS6A4_HUMAN Isoform 2 of Ribosomal protein S6 kinase alpha-4 OS=Homo sapiens OX=9606 GN=RPS6KA4;sp|O75676|KS6A4_HUMAN Ribosomal protein S6 kinase alpha-4 OS=Homo sapiens OX=9606 GN=RPS6KA4 PE=1 SV=1	1;2	717	0	NaN	NaN	NaN	NaN	NaN	NaN	NaN	NaN	NaN	NaN	NaN	NaN	NaN	NaN	NaN	NaN	NaN
UID3113	S	3	___1	SHILEDDENS(1)VDISMLK	0.999989	1.06e-07	123.55	111.25	123.55	-0.0086113	367240000	260	NaN	NaN	NaN	NaN	0.999989	0.985489	0.99994	0.766566	0	O75717-2;O75717	260;383	O75717-2	O75717-2	WD repeat and HMG-box DNA-binding protein 1	WDHD1	GRPRQRSHILEDDENSVDISMLKTGSSLLKE	sp|O75717-2|WDHD1_HUMAN Isoform 2 of WD repeat and HMG-box DNA-binding protein 1 OS=Homo sapiens OX=9606 GN=WDHD1;sp|O75717|WDHD1_HUMAN WD repeat and HMG-box DNA-binding protein 1 OS=Homo sapiens OX=9606 GN=WDHD1 PE=1 SV=1	1;2	723	0	NaN	NaN	NaN	NaN	NaN	NaN	NaN	NaN	NaN	NaN	NaN	NaN	NaN	NaN	NaN	NaN	NaN
UID3131	S	4	___1	RRES(1)MHVEQR	1	0.0139102	61.423	41.327	61.423	-0.25912	6918700	456	NaN	NaN	NaN	NaN	1	NaN	NaN	NaN	NaN	O75808	456	O75808	O75808	Calpain-15	CAPN15	LVAQRRGAAPLRRRESMHVEQRRQTDEGEAK	sp|O75808|CAN15_HUMAN Calpain-15 OS=Homo sapiens OX=9606 GN=CAPN15 PE=1 SV=1	1	729	0	NaN	NaN	NaN	NaN	NaN	NaN	NaN	NaN	NaN	NaN	NaN	NaN	NaN	NaN	NaN	NaN	NaN
UID3132	S	3	___1	VPPFS(1)PFSSTLQNNPVPR	0.999828	0.00011913	83.063	65.146	78.708	0.79701	74610000	233	0.999389	0.997999	NaN	0.989003	NaN	0.999828	0.998341	0.999221	NaN	O75808;O75808-2	233;233	O75808	O75808	Calpain-15	CAPN15	QGPAAEPEPPRVPPFSPFSSTLQNNPVPRSR	sp|O75808|CAN15_HUMAN Calpain-15 OS=Homo sapiens OX=9606 GN=CAPN15 PE=1 SV=1;sp|O75808-2|CAN15_HUMAN Isoform 2 of Calpain-15 OS=Homo sapiens OX=9606 GN=CAPN15	1	729	0	NaN	NaN	NaN	NaN	NaN	NaN	NaN	NaN	NaN	NaN	NaN	NaN	NaN	NaN	NaN	NaN	NaN
UID3142	S	3	___1	S(0.631)GS(0.369)QPACLDHMQDR	0.631471	0.000178788	83.614	68.348	80.238	1.0288	187160000	315	NaN	0	NaN	NaN	0.564805	0.631471	NaN	0.555225	0	O75815;O75815-3	315;224	O75815	O75815	Breast cancer anti-estrogen resistance protein 3	BCAR3	EQNLPRGNLLRNKEKSGSQPACLDHMQDRRA	sp|O75815|BCAR3_HUMAN Breast cancer anti-estrogen resistance protein 3 OS=Homo sapiens OX=9606 GN=BCAR3 PE=1 SV=1;sp|O75815-3|BCAR3_HUMAN Isoform 3 of Breast cancer anti-estrogen resistance protein 3 OS=Homo sapiens OX=9606 GN=BCAR3	1	730	0	NaN	NaN	NaN	NaN	NaN	NaN	NaN	NaN	NaN	NaN	NaN	NaN	NaN	NaN	NaN	NaN	NaN
UID3153	S	3	___1	AAAAAAAGDS(1)DS(1)WDADAFSVEDPVRK	0.999983	3.53e-81	139.61	123.47	85.866	-0.17263	455300000	13	NaN	NaN	0.999964	0.999964	0.99996	0.860187	0.999983	0.999891	0	O75822-2;O75822-3;O75822	13;13;13	O75822-2	O75822-2	Eukaryotic translation initiation factor 3 subunit J	EIF3J	___MAAAAAAAGDSDSWDADAFSVEDPVRKV	sp|O75822-2|EIF3J_HUMAN Isoform 2 of Eukaryotic translation initiation factor 3 subunit J OS=Homo sapiens OX=9606 GN=EIF3J;sp|O75822-3|EIF3J_HUMAN Isoform 3 of Eukaryotic translation initiation factor 3 subunit J OS=Homo sapiens OX=9606 GN=EIF3J;sp|O75822|	1;2	733	0	NaN	NaN	NaN	NaN	NaN	NaN	NaN	NaN	NaN	NaN	NaN	NaN	NaN	NaN	NaN	NaN	NaN
UID3169	S	3	___1	T(0.044)GS(0.949)RPS(0.006)S(0.002)HGGGGPAAAEEEVR	0.948888	6.51e-46	176.97	144.05	134.4	1.257	592170000	14	0.490831	0.650302	0.54973	0.948888	0.504191	0.770531	0.552246	0.25	0.471392	O75907	14	O75907	O75907	Diacylglycerol O-acyltransferase 1	DGAT1	__MGDRGSSRRRRTGSRPSSHGGGGPAAAEE	sp|O75907|DGAT1_HUMAN Diacylglycerol O-acyltransferase 1 OS=Homo sapiens OX=9606 GN=DGAT1 PE=1 SV=2	1;2	741	0	NaN	NaN	NaN	NaN	NaN	NaN	NaN	NaN	NaN	NaN	NaN	NaN	NaN	NaN	NaN	NaN	NaN
UID3188	S	3	___1	EYLS(1)ENEPWVDK	1	0.000109452	93.909	73.528	93.909	0.26653	64566000	75	NaN	NaN	NaN	NaN	NaN	0.999906	1	NaN	0	O75943-2;O75943	75;86	O75943-2	O75943-2	Cell cycle checkpoint protein RAD17	RAD17	SLEQIYGLENSKEYLSENEPWVDKYKPETQH	sp|O75943-2|RAD17_HUMAN Isoform 2 of Cell cycle checkpoint protein RAD17 OS=Homo sapiens OX=9606 GN=RAD17;sp|O75943|RAD17_HUMAN Cell cycle checkpoint protein RAD17 OS=Homo sapiens OX=9606 GN=RAD17 PE=1 SV=2	1	750	0	NaN	NaN	NaN	NaN	NaN	NaN	NaN	NaN	NaN	NaN	NaN	NaN	NaN	NaN	NaN	NaN	NaN
UID3236	S	3	___1	YFPSSCLDLNSPT(0.054)S(0.699)PT(0.193)PT(0.054)R	0.699417	7.54e-44	175.93	160.11	136.92	-0.10338	201380000	529	0.622271	0.608882	0.570275	NaN	0.506637	0.631738	0.699417	NaN	NaN	O76039-2;O76039	529;529	O76039-2	O76039-2	Cyclin-dependent kinase-like 5	CDKL5	SRYFPSSCLDLNSPTSPTPTRHSDTRTLLSP	sp|O76039-2|CDKL5_HUMAN Isoform 2 of Cyclin-dependent kinase-like 5 OS=Homo sapiens OX=9606 GN=CDKL5;sp|O76039|CDKL5_HUMAN Cyclin-dependent kinase-like 5 OS=Homo sapiens OX=9606 GN=CDKL5 PE=1 SV=1	1	761	0	NaN	NaN	NaN	NaN	NaN	NaN	NaN	NaN	NaN	NaN	NaN	NaN	NaN	NaN	NaN	NaN	NaN
UID3267	S	4	___1	S(0.957)RENS(0.035)VCS(0.008)DTSESSAAEFDDRR	0.956905	5.7e-11	108.1	89.264	80.711	-0.22535	78181000	338	0	0	NaN	NaN	0.754423	0.956905	NaN	NaN	0.752252	O94763-2;O94763-3;O94763;O94763-4	338;388;414;396	O94763-2	O94763-2	Unconventional prefoldin RPB5 interactor 1	URI1	VNGEYVPRKSILKSRSRENSVCSDTSESSAA	sp|O94763-2|RMP_HUMAN Isoform 2 of Unconventional prefoldin RPB5 interactor 1 OS=Homo sapiens OX=9606 GN=URI1;sp|O94763-3|RMP_HUMAN Isoform 3 of Unconventional prefoldin RPB5 interactor 1 OS=Homo sapiens OX=9606 GN=URI1;sp|O94763|RMP_HUMAN Unconventional p	1	772	0	NaN	NaN	NaN	NaN	NaN	NaN	NaN	NaN	NaN	NaN	NaN	NaN	NaN	NaN	NaN	NaN	NaN
UID3314	S	2	___1	AIS(0.643)S(0.338)PT(0.02)VSR	0.642724	0.00135543	97.597	61.689	97.597	-0.076898	232080000	159	0	NaN	NaN	0.532636	0.642724	0.457789	NaN	NaN	NaN	O94811	159	O94811	O94811	Tubulin polymerization-promoting protein	TPPP	IEGKAPIISGVTKAISSPTVSRLTDTTKFTG	sp|O94811|TPPP_HUMAN Tubulin polymerization-promoting protein OS=Homo sapiens OX=9606 GN=TPPP PE=1 SV=1	1	779	0	NaN	NaN	NaN	NaN	NaN	NaN	NaN	NaN	NaN	NaN	NaN	NaN	NaN	NaN	NaN	NaN	NaN
UID3332	S	2	___1	S(0.888)LS(0.112)ELCLAVPAPGIR	0.888491	2.91e-38	183.96	153.79	183.96	-0.63795	185570000	901	NaN	NaN	NaN	NaN	0.5603	0.564977	NaN	0.541657	0.888491	O94827-5;O94827-3;O94827;O94827-7;O94827-2;O94827-6	901;938;957;970;978;980	O94827-5	O94827-5	Pleckstrin homology domain-containing family G member 5	PLEKHG5	LAGAGTHGTPSAPSRSLSELCLAVPAPGIRT	sp|O94827-5|PKHG5_HUMAN Isoform 5 of Pleckstrin homology domain-containing family G member 5 OS=Homo sapiens OX=9606 GN=PLEKHG5;sp|O94827-3|PKHG5_HUMAN Isoform 3 of Pleckstrin homology domain-containing family G member 5 OS=Homo sapiens OX=9606 GN=PLEKHG5;	1	784	0	NaN	NaN	NaN	NaN	NaN	NaN	NaN	NaN	NaN	NaN	NaN	NaN	NaN	NaN	NaN	NaN	NaN
UID3341	S	3	___1	DAPTQPGS(1)PEHQALGPAASGAQGR	0.999839	2.72e-34	138.16	123.07	133.36	-0.65396	28870000	567	NaN	0.989046	NaN	NaN	NaN	0.999731	NaN	NaN	0.999839	O94850	567	O94850	O94850	Dendrin	DDN	PAPEVNLRDAPTQPGSPEHQALGPAASGAQG	sp|O94850|DEND_HUMAN Dendrin OS=Homo sapiens OX=9606 GN=DDN PE=1 SV=3	1	787	0	NaN	NaN	NaN	NaN	NaN	NaN	NaN	NaN	NaN	NaN	NaN	NaN	NaN	NaN	NaN	NaN	NaN
UID3357	S	5	___1	T(0.003)EES(0.003)EPLPS(0.535)CPGS(0.458)PPLPDDLLPLDCK	0.535146	0.0143056	41.763	23.044	41.763	0.024018	13033000	104	NaN	0	NaN	NaN	0.535146	0	NaN	NaN	NaN	O94864;O94864-2	104;102	O94864	O94864	STAGA complex 65 subunit gamma	SUPT7L	QQTEGVKTEESEPLPSCPGSPPLPDDLLPLD	sp|O94864|ST65G_HUMAN STAGA complex 65 subunit gamma OS=Homo sapiens OX=9606 GN=SUPT7L PE=1 SV=1;sp|O94864-2|ST65G_HUMAN Isoform 2 of STAGA complex 65 subunit gamma OS=Homo sapiens OX=9606 GN=SUPT7L	1	791	0	NaN	NaN	NaN	NaN	NaN	NaN	NaN	NaN	NaN	NaN	NaN	NaN	NaN	NaN	NaN	NaN	NaN
UID3463	S	4	___1	IYHPSCYEDYQNTS(0.002)S(0.002)FDCT(0.162)PS(0.82)PS(0.014)K	0.820212	7.78e-10	92.29	77.244	92.29	-0.3373	258990000	1493	NaN	NaN	NaN	NaN	0.80198	0.820212	NaN	NaN	NaN	O94913	1493	O94913	O94913	Pre-mRNA cleavage complex 2 protein Pcf11	PCF11	CYEDYQNTSSFDCTPSPSKTPVENPLNIMLN	sp|O94913|PCF11_HUMAN Pre-mRNA cleavage complex 2 protein Pcf11 OS=Homo sapiens OX=9606 GN=PCF11 PE=1 SV=3	1	808	0	NaN	NaN	NaN	NaN	NaN	NaN	NaN	NaN	NaN	NaN	NaN	NaN	NaN	NaN	NaN	NaN	NaN
UID3471	S	2	___1	S(0.004)KS(0.996)PS(1)PLK	0.999939	0.00438857	79.659	45.406	76.843	-0.0073466	10193000000	372	0.995645	0.993521	0.999371	0.997303	0.946942	0.992544	0.999939	0.991423	0.999742	O94913	372	O94913	O94913	Pre-mRNA cleavage complex 2 protein Pcf11	PCF11	LDQLDSKSKSKSKSPSPLKNKLSHTKDLKNQ	sp|O94913|PCF11_HUMAN Pre-mRNA cleavage complex 2 protein Pcf11 OS=Homo sapiens OX=9606 GN=PCF11 PE=1 SV=3	1;2	808	0	NaN	NaN	NaN	NaN	NaN	NaN	NaN	NaN	NaN	NaN	NaN	NaN	NaN	NaN	NaN	NaN	NaN
UID3499	S	3	___1	EIS(0.55)S(0.45)PARPCSFEEAMK	0.549781	5.23e-05	104.89	65.751	104.89	0.31867	53764000	560	0.499413	0.499894	NaN	NaN	0.497927	0.549781	NaN	0.499887	0.499731	O94916;O94916-4;O94916-5;O94916-2	560;577;578;484	O94916	O94916	Nuclear factor of activated T-cells 5	NFAT5	PAAAGALNVNVKKEISSPARPCSFEEAMKAM	sp|O94916|NFAT5_HUMAN Nuclear factor of activated T-cells 5 OS=Homo sapiens OX=9606 GN=NFAT5 PE=1 SV=1;sp|O94916-4|NFAT5_HUMAN Isoform D of Nuclear factor of activated T-cells 5 OS=Homo sapiens OX=9606 GN=NFAT5;sp|O94916-5|NFAT5_HUMAN Isoform E of Nuclear	1	810	0	NaN	NaN	NaN	NaN	NaN	NaN	NaN	NaN	NaN	NaN	NaN	NaN	NaN	NaN	NaN	NaN	NaN
UID3581	S	3	___1	LRRES(0.755)S(0.244)VDS(0.001)R	0.754642	0.00439751	66.989	38.085	66.989	-0.58718	28184000	302	NaN	0	0	NaN	0.754642	NaN	NaN	NaN	0	O95049-5;O95049;O95049-4;O95049-3	302;338;347;357	O95049-5	O95049-5	Tight junction protein ZO-3	TJP3	SQTDSPVESPRLRRESSVDSRTISEPDEQRS	sp|O95049-5|ZO3_HUMAN Isoform 6 of Tight junction protein ZO-3 OS=Homo sapiens OX=9606 GN=TJP3;sp|O95049|ZO3_HUMAN Tight junction protein ZO-3 OS=Homo sapiens OX=9606 GN=TJP3 PE=1 SV=3;sp|O95049-4|ZO3_HUMAN Isoform 4 of Tight junction protein ZO-3 OS=Homo	1	826	0	NaN	NaN	NaN	NaN	NaN	NaN	NaN	NaN	NaN	NaN	NaN	NaN	NaN	NaN	NaN	NaN	NaN
UID3594	S	2	___1	DLAS(1)PLIGR	1	0.00832798	71.524	46.398	71.524	-0.23024	26052000	392	NaN	NaN	NaN	NaN	NaN	1	NaN	NaN	0	O95067	392	O95067	O95067	G2/mitotic-specific cyclin-B2	CCNB2	SMIPQLNSKAVKDLASPLIGRS_________	sp|O95067|CCNB2_HUMAN G2/mitotic-specific cyclin-B2 OS=Homo sapiens OX=9606 GN=CCNB2 PE=1 SV=1	1	827	0	NaN	NaN	NaN	NaN	NaN	NaN	NaN	NaN	NaN	NaN	NaN	NaN	NaN	NaN	NaN	NaN	NaN
UID3604	S	4	___1	GS(0.232)GLLGS(0.767)QPQPVIPASVIPEELISQAQVVLQGK	0.767338	3.75e-07	68.917	60.521	68.917	-0.84211	13062000	174	NaN	0	NaN	NaN	NaN	0.767338	NaN	NaN	NaN	O95071-2;O95071	174;174	O95071-2	O95071-2	E3 ubiquitin-protein ligase UBR5	UBR5	RVIRTGRDRGSGLLGSQPQPVIPASVIPEEL	sp|O95071-2|UBR5_HUMAN Isoform 2 of E3 ubiquitin-protein ligase UBR5 OS=Homo sapiens OX=9606 GN=UBR5;sp|O95071|UBR5_HUMAN E3 ubiquitin-protein ligase UBR5 OS=Homo sapiens OX=9606 GN=UBR5 PE=1 SV=2	1	828	0	NaN	NaN	NaN	NaN	NaN	NaN	NaN	NaN	NaN	NaN	NaN	NaN	NaN	NaN	NaN	NaN	NaN
UID3612	S	3	___1	T(0.145)AS(0.854)PEDS(0.002)DMPDHDLEPPR	0.853543	3.28e-08	126.02	109.53	126.02	0.036294	63675000	1308	NaN	NaN	NaN	NaN	0.815098	NaN	NaN	0.853543	NaN	O95071-2;O95071	1308;1308	O95071-2	O95071-2	E3 ubiquitin-protein ligase UBR5	UBR5	YRPPRIREDRNRKTASPEDSDMPDHDLEPPR	sp|O95071-2|UBR5_HUMAN Isoform 2 of E3 ubiquitin-protein ligase UBR5 OS=Homo sapiens OX=9606 GN=UBR5;sp|O95071|UBR5_HUMAN E3 ubiquitin-protein ligase UBR5 OS=Homo sapiens OX=9606 GN=UBR5 PE=1 SV=2	1	828	0	NaN	NaN	NaN	NaN	NaN	NaN	NaN	NaN	NaN	NaN	NaN	NaN	NaN	NaN	NaN	NaN	NaN
UID3728	S	3	___1	S(0.116)T(0.116)S(0.653)T(0.116)LYSQFQTAESENR	0.653266	4.59e-62	210.47	193.53	210.47	0.094276	55093000	1749	NaN	NaN	0	NaN	NaN	0.653266	NaN	0	NaN	O95248;O95248-5;O95248-4	1749;1774;1775	O95248	O95248	Myotubularin-related protein 5	SBF1	GSTTSGSRQAARRSTSTLYSQFQTAESENRS	sp|O95248|MTMR5_HUMAN Myotubularin-related protein 5 OS=Homo sapiens OX=9606 GN=SBF1 PE=1 SV=4;sp|O95248-5|MTMR5_HUMAN Isoform 5 of Myotubularin-related protein 5 OS=Homo sapiens OX=9606 GN=SBF1;sp|O95248-4|MTMR5_HUMAN Isoform 4 of Myotubularin-related pro	1	851	0	NaN	NaN	NaN	NaN	NaN	NaN	NaN	NaN	NaN	NaN	NaN	NaN	NaN	NaN	NaN	NaN	NaN
UID3769	S	3	___1	QALYLMFDT(0.069)S(0.552)QES(0.379)PVK	0.551897	0.000292207	83.729	65.812	83.729	-0.16289	15579000	2554	0	NaN	NaN	0	0.551897	0.545559	NaN	NaN	0	O95359-3;O95359;O95359-5;O95359-6;O95359-1;O95359-2	2554;2554;700;632;632;254	O95359-3	O95359-3	Transforming acidic coiled-coil-containing protein 2	TACC2	DDAPKKQALYLMFDTSQESPVKSSPVRMSES	sp|O95359-3|TACC2_HUMAN Isoform 3 of Transforming acidic coiled-coil-containing protein 2 OS=Homo sapiens OX=9606 GN=TACC2;sp|O95359|TACC2_HUMAN Transforming acidic coiled-coil-containing protein 2 OS=Homo sapiens OX=9606 GN=TACC2 PE=1 SV=3;sp|O95359-5|TAC	1	862	0	NaN	NaN	NaN	NaN	NaN	NaN	NaN	NaN	NaN	NaN	NaN	NaN	NaN	NaN	NaN	NaN	NaN
UID3836	S	4	___1	QLHVLVPQS(0.998)PPT(0.002)DLPGLTR	0.998168	2.53e-05	82.593	62.755	82.593	0.30722	223860000	535	NaN	NaN	0.970016	0.998168	0.961467	0.99484	NaN	0	NaN	O95402	535	O95402	O95402	Mediator of RNA polymerase II transcription subunit 26	MED26	STRQGARQLHVLVPQSPPTDLPGLTREVTQD	sp|O95402|MED26_HUMAN Mediator of RNA polymerase II transcription subunit 26 OS=Homo sapiens OX=9606 GN=MED26 PE=1 SV=2	1	871	0	NaN	NaN	NaN	NaN	NaN	NaN	NaN	NaN	NaN	NaN	NaN	NaN	NaN	NaN	NaN	NaN	NaN
UID3908	S	3	___1	DVEDFITTSFDS(0.002)QET(0.073)LS(0.192)S(0.732)PPPGLEGK	0.732393	5.27e-28	135.86	124.87	122.47	0.095035	26967000	2327	0.329136	NaN	0.369729	0.162188	0.515983	0.732393	0.444929	0.366827	NaN	O95613;O95613-2	2327;2209	O95613	O95613	Pericentrin	PCNT	EDFITTSFDSQETLSSPPPGLEGKADRSEKS	sp|O95613|PCNT_HUMAN Pericentrin OS=Homo sapiens OX=9606 GN=PCNT PE=1 SV=4;sp|O95613-2|PCNT_HUMAN Isoform 2 of Pericentrin OS=Homo sapiens OX=9606 GN=PCNT	1	892	0	NaN	NaN	NaN	NaN	NaN	NaN	NaN	NaN	NaN	NaN	NaN	NaN	NaN	NaN	NaN	NaN	NaN
UID3914	S	3	___1	LS(0.371)PGS(0.629)GGPEAQTAGPVTPASISGR	0.628809	1.07e-09	91.67	81.672	91.67	0.27757	81334000	2355	NaN	0	NaN	NaN	0.628809	NaN	NaN	NaN	NaN	O95613;O95613-2	2355;2237	O95613	O95613	Pericentrin	PCNT	EKSDGSGFGARLSPGSGGPEAQTAGPVTPAS	sp|O95613|PCNT_HUMAN Pericentrin OS=Homo sapiens OX=9606 GN=PCNT PE=1 SV=4;sp|O95613-2|PCNT_HUMAN Isoform 2 of Pericentrin OS=Homo sapiens OX=9606 GN=PCNT	1	892	0	NaN	NaN	NaN	NaN	NaN	NaN	NaN	NaN	NaN	NaN	NaN	NaN	NaN	NaN	NaN	NaN	NaN
UID3939	S	4	___1	GPTTGEGALDLS(0.005)DVHS(0.995)PPKS(1)PEGK	1	3.18e-108	217.07	197.25	217.07	2.3756	3162300000	160	1	1	0.999984	1	0.999997	1	0.999981	0.999987	0.979796	O95684;O95684-2	160;160	O95684	O95684	FGFR1 oncogene partner	FGFR1OP	GEGALDLSDVHSPPKSPEGKTSAQTTPSKIP	sp|O95684|FR1OP_HUMAN FGFR1 oncogene partner OS=Homo sapiens OX=9606 GN=FGFR1OP PE=1 SV=1;sp|O95684-2|FR1OP_HUMAN Isoform 2 of FGFR1 oncogene partner OS=Homo sapiens OX=9606 GN=FGFR1OP	1;2;3	899	0	NaN	NaN	NaN	NaN	NaN	NaN	NaN	NaN	NaN	NaN	NaN	NaN	NaN	NaN	NaN	NaN	NaN
UID4055	S	3	___1	S(0.084)S(0.105)S(0.672)S(0.139)FT(0.001)PFIDPR	0.671913	0.0014196	72.321	58.887	72.321	0.47435	35696000	888	0	NaN	NaN	0.36794	0.671913	NaN	0.655925	0	0	O95819-4;O95819;O95819-5;O95819-2;O95819-3;O95819-6	772;854;849;827;935;888	O95819-4;O95819-2;O95819-6	O95819-6	Mitogen-activated protein kinase kinase kinase kinase 4	MAP4K4	ETQSASSTLQKHKSSSSFTPFIDPRLLQISP;QTQSASSTLQKHKSSSSFTPFIDPRLLQISP	sp|O95819-4|M4K4_HUMAN Isoform 4 of Mitogen-activated protein kinase kinase kinase kinase 4 OS=Homo sapiens OX=9606 GN=MAP4K4;sp|O95819|M4K4_HUMAN Mitogen-activated protein kinase kinase kinase kinase 4 OS=Homo sapiens OX=9606 GN=MAP4K4 PE=1 SV=2;sp|O95819	1;2	919;920;921	0	NaN	NaN	NaN	NaN	NaN	NaN	NaN	NaN	NaN	NaN	NaN	NaN	NaN	NaN	NaN	NaN	NaN
UID4064	S	3	___1	S(0.554)S(0.222)S(0.222)KS(0.001)EGSPSQR	0.554405	0.00291243	67.648	56.369	67.648	0.046629	6043700	678	0	NaN	0	NaN	0	0.554405	0.326043	NaN	NaN	O95819-4;O95819;O95819-5;O95819-2;O95819-3;O95819-6	623;708;700;678;786;678	O95819-4;O95819-2;O95819-6	O95819-6	Mitogen-activated protein kinase kinase kinase kinase 4	MAP4K4	HPGSQSGSGERFRVRSSSKSEGSPSQRLENA	sp|O95819-4|M4K4_HUMAN Isoform 4 of Mitogen-activated protein kinase kinase kinase kinase 4 OS=Homo sapiens OX=9606 GN=MAP4K4;sp|O95819|M4K4_HUMAN Mitogen-activated protein kinase kinase kinase kinase 4 OS=Homo sapiens OX=9606 GN=MAP4K4 PE=1 SV=2;sp|O95819	1	919;920;921	0	NaN	NaN	NaN	NaN	NaN	NaN	NaN	NaN	NaN	NaN	NaN	NaN	NaN	NaN	NaN	NaN	NaN
UID4068	S	2	___1	T(0.032)T(0.044)S(0.94)RS(0.949)PVLS(0.036)R	0.939602	0.00142212	78.814	52.875	59.116	0.11151	2514200000	598	0.701624	0.732042	0.684956	0.761222	0.816568	0.776583	0.939602	0.418695	0.7743	O95819-4;O95819;O95819-5;O95819-2;O95819-3;O95819-6	544;629;621;598;706;598	O95819-4;O95819-2;O95819-6	O95819-6	Mitogen-activated protein kinase kinase kinase kinase 4	MAP4K4	ALQRPAEPQVPVRTTSRSPVLSRRDSPLQGS;YEPADRAREVPVRTTSRSPVLSRRDSPLQGS	sp|O95819-4|M4K4_HUMAN Isoform 4 of Mitogen-activated protein kinase kinase kinase kinase 4 OS=Homo sapiens OX=9606 GN=MAP4K4;sp|O95819|M4K4_HUMAN Mitogen-activated protein kinase kinase kinase kinase 4 OS=Homo sapiens OX=9606 GN=MAP4K4 PE=1 SV=2;sp|O95819	1;2	919;920;921	0	NaN	NaN	NaN	NaN	NaN	NaN	NaN	NaN	NaN	NaN	NaN	NaN	NaN	NaN	NaN	NaN	NaN
UID4150	S	3	___1	ADFDNTVAIHPT(0.018)S(0.589)S(0.393)EELVTLR	0.588676	6.37e-28	157.31	135.91	157.31	0.42061	78686000	432	NaN	NaN	0	NaN	0.588676	NaN	NaN	0	NaN	P00390-5;P00390-4;P00390-2;P00390-3;P00390	432;461;471;485;514	P00390-5	P00390-5	Glutathione reductase, mitochondrial	GSR	ATKADFDNTVAIHPTSSEELVTLR_______	sp|P00390-5|GSHR_HUMAN Isoform 4 of Glutathione reductase, mitochondrial OS=Homo sapiens OX=9606 GN=GSR;sp|P00390-4|GSHR_HUMAN Isoform 3 of Glutathione reductase, mitochondrial OS=Homo sapiens OX=9606 GN=GSR;sp|P00390-2|GSHR_HUMAN Isoform Cytoplasmic of Gl	1	956	0	NaN	NaN	NaN	NaN	NaN	NaN	NaN	NaN	NaN	NaN	NaN	NaN	NaN	NaN	NaN	NaN	NaN
UID4152	S	4	___1	GDGPVQGIINFEQKES(1)NGPVK	1	5.24e-72	198.55	173.34	198.55	-0.31673	56560000	26	NaN	NaN	NaN	NaN	0	1	NaN	NaN	NaN	P00441	26	P00441	P00441	Superoxide dismutase [Cu-Zn]	SOD1	GDGPVQGIINFEQKESNGPVKVWGSIKGLTE	sp|P00441|SODC_HUMAN Superoxide dismutase [Cu-Zn] OS=Homo sapiens OX=9606 GN=SOD1 PE=1 SV=2	1	957	0	NaN	NaN	NaN	NaN	NaN	NaN	NaN	NaN	NaN	NaN	NaN	NaN	NaN	NaN	NaN	NaN	NaN
UID4158	S	4	___1	DIMES(0.5)S(0.5)PGS(0.09)S(0.908)PPNLT(0.002)PKPLR	0.907764	0.000172153	72.99	57.354	59.912	-0.29808	146900000	828	NaN	0	0.806487	0.907764	0.62402	0.821351	NaN	0.817614	NaN	P00519-2;P00519	828;809	P00519-2	P00519-2	Tyrosine-protein kinase ABL1	ABL1	ADEVFKDIMESSPGSSPPNLTPKPLRRQVTV	sp|P00519-2|ABL1_HUMAN Isoform IB of Tyrosine-protein kinase ABL1 OS=Homo sapiens OX=9606 GN=ABL1;sp|P00519|ABL1_HUMAN Tyrosine-protein kinase ABL1 OS=Homo sapiens OX=9606 GN=ABL1 PE=1 SV=4	1;2;3	960	0	NaN	NaN	NaN	NaN	NaN	NaN	NaN	NaN	NaN	NaN	NaN	NaN	NaN	NaN	NaN	NaN	NaN
UID4167	S	4	___1	S(0.034)CS(0.09)AS(0.876)CVPHGAK	0.876225	0.00327475	65.219	49.953	56.648	0.19316	155170000	739	0.349377	0.333333	0	0	0.876225	0	0.388673	0.333333	0	P00519-2;P00519	739;720	P00519-2	P00519-2	Tyrosine-protein kinase ABL1	ABL1	GGGSSSKRFLRSCSASCVPHGAKDTEWRSVT	sp|P00519-2|ABL1_HUMAN Isoform IB of Tyrosine-protein kinase ABL1 OS=Homo sapiens OX=9606 GN=ABL1;sp|P00519|ABL1_HUMAN Tyrosine-protein kinase ABL1 OS=Homo sapiens OX=9606 GN=ABL1 PE=1 SV=4	1	960	0	NaN	NaN	NaN	NaN	NaN	NaN	NaN	NaN	NaN	NaN	NaN	NaN	NaN	NaN	NaN	NaN	NaN
UID4176	S	4	___1	YS(0.779)S(0.213)DPT(0.007)GALTEDSIDDTFLPVPEYINQSVPK	0.779262	2.73e-38	138.85	126.53	138.85	0.34804	53675000	1070	0	0	NaN	NaN	0.498318	0.779262	NaN	NaN	0.479789	P00533	1070	P00533	P00533	Epidermal growth factor receptor	EGFR	LQSCPIKEDSFLQRYSSDPTGALTEDSIDDT	sp|P00533|EGFR_HUMAN Epidermal growth factor receptor OS=Homo sapiens OX=9606 GN=EGFR PE=1 SV=2	1	961	0	NaN	NaN	NaN	NaN	NaN	NaN	NaN	NaN	NaN	NaN	NaN	NaN	NaN	NaN	NaN	NaN	NaN
UID4216	S	3	___1	ASASGSGAQVGGPIS(0.138)S(0.816)GS(0.034)S(0.008)AS(0.003)S(0.001)VTVTR	0.816022	1.02e-132	206.49	172.39	138.8	-0.15612	136590000	613	0	NaN	0.295692	0	0.816022	0.426261	0.469535	0.485689	0.350796	P02545;P02545-3;P02545-5;P02545-4	613;583;514;501	P02545	P02545	Prelamin-A/C;Lamin-A/C	LMNA	ASASGSGAQVGGPISSGSSASSVTVTRSYRS	sp|P02545|LMNA_HUMAN Prelamin-A/C OS=Homo sapiens OX=9606 GN=LMNA PE=1 SV=1;sp|P02545-3|LMNA_HUMAN Isoform ADelta10 of Prelamin-A/C OS=Homo sapiens OX=9606 GN=LMNA;sp|P02545-5|LMNA_HUMAN Isoform 5 of Prelamin-A/C OS=Homo sapiens OX=9606 GN=LMNA;sp|P02545-4	1	973	0	NaN	NaN	NaN	NaN	NaN	NaN	NaN	NaN	NaN	NaN	NaN	NaN	NaN	NaN	NaN	NaN	NaN
UID4227	S	3	___1	IRIDS(0.331)LS(0.669)AQLSQLQK	0.669237	1.76e-35	180.08	114.27	180.08	0.029603	41644000	303	0	0	NaN	0	NaN	0.669237	NaN	NaN	NaN	P02545;P02545-3;P02545-2;P02545-6;P02545-5;P02545-4	303;303;303;303;204;191	P02545	P02545	Prelamin-A/C;Lamin-A/C	LMNA	AHEELQQSRIRIDSLSAQLSQLQKQLAAKEA	sp|P02545|LMNA_HUMAN Prelamin-A/C OS=Homo sapiens OX=9606 GN=LMNA PE=1 SV=1;sp|P02545-3|LMNA_HUMAN Isoform ADelta10 of Prelamin-A/C OS=Homo sapiens OX=9606 GN=LMNA;sp|P02545-2|LMNA_HUMAN Isoform C of Prelamin-A/C OS=Homo sapiens OX=9606 GN=LMNA;sp|P02545-6	1	973	0	NaN	NaN	NaN	NaN	NaN	NaN	NaN	NaN	NaN	NaN	NaN	NaN	NaN	NaN	NaN	NaN	NaN
UID4242	S	3	___1	SGAQAS(0.051)S(0.913)T(0.036)PLSPTR	0.912609	1.74e-12	137.81	117.04	86.213	-2.8113	128740000	18	0.912609	NaN	NaN	0.37494	0.715642	0.499903	NaN	0	0	P02545;P02545-3;P02545-2;P02545-6	18;18;18;18	P02545	P02545	Prelamin-A/C;Lamin-A/C	LMNA	TPSQRRATRSGAQASSTPLSPTRITRLQEKE	sp|P02545|LMNA_HUMAN Prelamin-A/C OS=Homo sapiens OX=9606 GN=LMNA PE=1 SV=1;sp|P02545-3|LMNA_HUMAN Isoform ADelta10 of Prelamin-A/C OS=Homo sapiens OX=9606 GN=LMNA;sp|P02545-2|LMNA_HUMAN Isoform C of Prelamin-A/C OS=Homo sapiens OX=9606 GN=LMNA;sp|P02545-6	1	973	0	NaN	NaN	NaN	NaN	NaN	NaN	NaN	NaN	NaN	NaN	NaN	NaN	NaN	NaN	NaN	NaN	NaN
UID4270	S	3	___1	NPIT(0.111)S(0.889)PVVTQK	0.889209	0.000366242	86.413	53.15	86.413	-0.14295	146430000	356	NaN	NaN	NaN	NaN	0.889209	0.816312	NaN	0	0	P04035-2;P04035;P04035-3	356;356;376	P04035-2	P04035-2	3-hydroxy-3-methylglutaryl-coenzyme A reductase	HMGCR	QTETESTLSLKNPITSPVVTQKKVPDNCCRR	sp|P04035-2|HMDH_HUMAN Isoform 2 of 3-hydroxy-3-methylglutaryl-coenzyme A reductase OS=Homo sapiens OX=9606 GN=HMGCR;sp|P04035|HMDH_HUMAN 3-hydroxy-3-methylglutaryl-coenzyme A reductase OS=Homo sapiens OX=9606 GN=HMGCR PE=1 SV=1;sp|P04035-3|HMDH_HUMAN Isof	1	982	0	NaN	NaN	NaN	NaN	NaN	NaN	NaN	NaN	NaN	NaN	NaN	NaN	NaN	NaN	NaN	NaN	NaN
UID4311	S	3	___1	FVVIQNEDLGPAS(0.001)PLDS(0.609)T(0.39)FYR	0.608846	4.58e-16	134.26	110.22	134.26	-0.18175	32073000	316	NaN	NaN	0.608846	0.56396	NaN	0.561836	0.498367	NaN	0	P04626-3;P04626-2;P04626-5;P04626-4;P04626	316;392;972;987;1002	P04626-3	P04626-3	Receptor tyrosine-protein kinase erbB-2	ERBB2	VVIQNEDLGPASPLDSTFYRSLLEDDDMGDL	sp|P04626-3|ERBB2_HUMAN Isoform 3 of Receptor tyrosine-protein kinase erbB-2 OS=Homo sapiens OX=9606 GN=ERBB2;sp|P04626-2|ERBB2_HUMAN Isoform 2 of Receptor tyrosine-protein kinase erbB-2 OS=Homo sapiens OX=9606 GN=ERBB2;sp|P04626-5|ERBB2_HUMAN Isoform 5 of	1	994	0	NaN	NaN	NaN	NaN	NaN	NaN	NaN	NaN	NaN	NaN	NaN	NaN	NaN	NaN	NaN	NaN	NaN
UID4445	S	4	___1	ILVSIGES(0.004)FGT(0.418)S(0.578)EK	0.5783	0.000354081	77.562	61.337	77.562	-0.40414	4818400	842	NaN	NaN	0	NaN	NaN	0.5783	0	NaN	0.565793	P06400	842	P06400	P06400	Retinoblastoma-associated protein	RB1	PRSRILVSIGESFGTSEKFQKINQMVCNSDR	sp|P06400|RB_HUMAN Retinoblastoma-associated protein OS=Homo sapiens OX=9606 GN=RB1 PE=1 SV=2	1	1028	0	NaN	NaN	NaN	NaN	NaN	NaN	NaN	NaN	NaN	NaN	NaN	NaN	NaN	NaN	NaN	NaN	NaN
UID4458	S	3	___1	AAVPS(0.996)GAS(0.004)TGIYEALELR	0.995858	1.63e-05	100.53	80.438	100.53	0.33932	159660000	37	0.97758	0.988673	0.732254	0.635698	NaN	0.995858	0.99178	0.976761	0.978918	P06733;P13929-3;P13929-2;P13929;P09104-2;P09104	37;37;37;37;37;37	P06733;P09104-2	P06733	Alpha-enolase;Beta-enolase;Gamma-enolase	ENO1;ENO3;ENO2	VDLFTSKGLFRAAVPSGASTGIYEALELRDN;VDLYTAKGLFRAAVPSGASTGIYEALELRDG	sp|P06733|ENOA_HUMAN Alpha-enolase OS=Homo sapiens OX=9606 GN=ENO1 PE=1 SV=2;sp|P13929-3|ENOB_HUMAN Isoform 3 of Beta-enolase OS=Homo sapiens OX=9606 GN=ENO3;sp|P13929-2|ENOB_HUMAN Isoform 2 of Beta-enolase OS=Homo sapiens OX=9606 GN=ENO3;sp|P13929|ENOB_HU	1	1034;1094	0	NaN	NaN	NaN	NaN	NaN	NaN	NaN	NaN	NaN	NaN	NaN	NaN	NaN	NaN	NaN	NaN	NaN
UID4485	S	3	___1	MS(0.983)VQPT(0.017)VSLGGFEITPPVVLR	0.983072	1.06e-08	95.319	83.879	95.319	-0.76145	17891000	82	0	0	0	0	0.983072	0	0	NaN	0	P06748;P06748-3;P06748-2	82;82;82	P06748	P06748	Nucleophosmin	NPM1	YEGSPIKVTLATLKMSVQPTVSLGGFEITPP	sp|P06748|NPM_HUMAN Nucleophosmin OS=Homo sapiens OX=9606 GN=NPM1 PE=1 SV=2;sp|P06748-3|NPM_HUMAN Isoform 3 of Nucleophosmin OS=Homo sapiens OX=9606 GN=NPM1;sp|P06748-2|NPM_HUMAN Isoform 2 of Nucleophosmin OS=Homo sapiens OX=9606 GN=NPM1	1	1036	0	NaN	NaN	NaN	NaN	NaN	NaN	NaN	NaN	NaN	NaN	NaN	NaN	NaN	NaN	NaN	NaN	NaN
UID4492	S	3	___1	AMGIMNS(1)FVNDIFER	1	4.33e-05	99.021	85.595	75.239	0.31761	53738000	65	1	NaN	0	1	1	1	1	NaN	NaN	Q16778;P33778;P23527;P06899;P58876;Q99879;Q99877;Q93079;Q5QNW6;P62807;P57053;O60814;Q5QNW6-2;Q99880;Q8N257	65;65;65;65;65;65;65;65;65;65;65;65;65;65;65	Q16778;P58876;Q8N257	P58876	Histone H2B type 2-E;Histone H2B type 1-B;Histone H2B type 1-O;Histone H2B type 1-J;Histone H2B type 1-D;Histone H2B type 1-M;Histone H2B type 1-N;Histone H2B type 1-H;Histone H2B type 2-F;Histone H2B type 1-C/E/F/G/I;Histone H2B type F-S;Histone H2B type 1-K;Histone H2B type 1-L;Histone H2B type 3-B	HIST2H2BE;HIST1H2BB;HIST1H2BO;HIST1H2BJ;HIST1H2BD;HIST1H2BM;HIST1H2BN;HIST1H2BH;HIST2H2BF;HIST1H2BC;H2BFS;HIST1H2BK;HIST1H2BL;HIST3H2BB	HPDTGISSKAMGIMNSFVNDIFERIAGEASR;HPDTGISSKAMGIMNSFVNDIFERIASEASR	sp|Q16778|H2B2E_HUMAN Histone H2B type 2-E OS=Homo sapiens OX=9606 GN=HIST2H2BE PE=1 SV=3;sp|P33778|H2B1B_HUMAN Histone H2B type 1-B OS=Homo sapiens OX=9606 GN=HIST1H2BB PE=1 SV=2;sp|P23527|H2B1O_HUMAN Histone H2B type 1-O OS=Homo sapiens OX=9606 GN=HIST1H	1	1041;2178;4319	0	NaN	NaN	NaN	NaN	NaN	NaN	NaN	NaN	NaN	NaN	NaN	NaN	NaN	NaN	NaN	NaN	NaN
UID4531	S	3	___1	DNYS(1)PGWK	0.999951	0.00494854	72.531	45.202	72.531	0.35422	79101000	1350	0	0.985614	0.999951	NaN	NaN	0.999884	NaN	0.994296	NaN	P07814	1350	P07814	P07814	Bifunctional glutamate/proline--tRNA ligase;Glutamate--tRNA ligase;Proline--tRNA ligase	EPRS	LSVNIRVRADLRDNYSPGWKFNHWELKGVPI	sp|P07814|SYEP_HUMAN Bifunctional glutamate/proline--tRNA ligase OS=Homo sapiens OX=9606 GN=EPRS1 PE=1 SV=5	1	1054	0	NaN	NaN	NaN	NaN	NaN	NaN	NaN	NaN	NaN	NaN	NaN	NaN	NaN	NaN	NaN	NaN	NaN
UID4539	S	3	___1	LNLNNT(0.001)VLS(0.999)K	0.999426	0.000344069	94.551	53.827	94.551	0.30414	66644000	434	NaN	0.98669	NaN	NaN	0.999426	NaN	NaN	NaN	NaN	P07814	434	P07814	P07814	Bifunctional glutamate/proline--tRNA ligase;Glutamate--tRNA ligase;Proline--tRNA ligase	EPRS	YIWEYSRLNLNNTVLSKRKLTWFVNEGLVDG	sp|P07814|SYEP_HUMAN Bifunctional glutamate/proline--tRNA ligase OS=Homo sapiens OX=9606 GN=EPRS1 PE=1 SV=5	1	1054	0	NaN	NaN	NaN	NaN	NaN	NaN	NaN	NaN	NaN	NaN	NaN	NaN	NaN	NaN	NaN	NaN	NaN
UID4552	S	2	___1	YES(0.997)LT(0.003)DPSK	0.996951	5.05e-06	114.74	96.64	78.513	-2.8941	184820000	58	0.996951	0.660593	NaN	0	0.61416	NaN	NaN	0.477582	0.737	P07900;P07900-2;Q58FF6;P08238;Q58FF7;Q58FF8	63;185;34;58;58;58	P07900;P08238;Q58FF8	P08238	Heat shock protein HSP 90-alpha;Putative heat shock protein HSP 90-beta 4;Heat shock protein HSP 90-beta;Putative heat shock protein HSP 90-beta-3;Putative heat shock protein HSP 90-beta 2	HSP90AA1;HSP90AB4P;HSP90AB1;HSP90AB3P;HSP90AB2P	LISNASDALDKIRYESLTDPSKLDSGKELKI;LISNSSDALDKIRYESLTDPSKLDSGKELHI	sp|P07900|HS90A_HUMAN Heat shock protein HSP 90-alpha OS=Homo sapiens OX=9606 GN=HSP90AA1 PE=1 SV=5;sp|P07900-2|HS90A_HUMAN Isoform 2 of Heat shock protein HSP 90-alpha OS=Homo sapiens OX=9606 GN=HSP90AA1;sp|Q58FF6|H90B4_HUMAN Putative heat shock protein H	1	1055;1074;3328	0	NaN	NaN	NaN	NaN	NaN	NaN	NaN	NaN	NaN	NaN	NaN	NaN	NaN	NaN	NaN	NaN	NaN
UID4573	S	3	___1	SAAEMY(0.028)GS(0.456)S(0.516)FDLDYDFQR	0.516026	0.00198577	58.366	40.449	58.366	0.4632	9901400	108	NaN	0	NaN	NaN	NaN	0.516026	NaN	NaN	NaN	P07910-2;P07910-4	108;108	P07910-2	P07910-2	Heterogeneous nuclear ribonucleoproteins C1/C2	HNRNPC	GKAGVKRSAAEMYGSSFDLDYDFQRDYYDRM	sp|P07910-2|HNRPC_HUMAN Isoform C1 of Heterogeneous nuclear ribonucleoproteins C1/C2 OS=Homo sapiens OX=9606 GN=HNRNPC;sp|P07910-4|HNRPC_HUMAN Isoform 4 of Heterogeneous nuclear ribonucleoproteins C1/C2 OS=Homo sapiens OX=9606 GN=HNRNPC	1	1057	0	NaN	NaN	NaN	NaN	NaN	NaN	NaN	NaN	NaN	NaN	NaN	NaN	NaN	NaN	NaN	NaN	NaN
UID4602	S	4	___1	IEDVGS(1)DEEDDS(1)GKDKK	1	5.97e-125	270.79	244.2	91.128	-0.28863	45972000000	261	1	1	1	1	1	1	1	1	1	P08238;Q58FF8	261;183	P08238;Q58FF8	P08238	Heat shock protein HSP 90-beta;Putative heat shock protein HSP 90-beta 2	HSP90AB1;HSP90AB2P	EKPKIEDVGSDEEDDSGKDKKKKTKKIKEKY	sp|P08238|HS90B_HUMAN Heat shock protein HSP 90-beta OS=Homo sapiens OX=9606 GN=HSP90AB1 PE=1 SV=4;sp|Q58FF8|H90B2_HUMAN Putative heat shock protein HSP 90-beta 2 OS=Homo sapiens OX=9606 GN=HSP90AB2P PE=1 SV=2	1;2	1074;3328	0	NaN	NaN	NaN	NaN	NaN	NaN	NaN	NaN	NaN	NaN	NaN	NaN	NaN	NaN	NaN	NaN	NaN
UID4621	S	3	___1	ATFPEDQFPNS(0.003)S(0.017)QNGS(0.98)CR	0.98006	1.69e-05	99.957	77.97	87.099	-0.40232	97326000	1020	NaN	NaN	NaN	0.895923	NaN	0.98006	NaN	NaN	0.955094	P08581;P08581-2	1020;1038	P08581	P08581	Hepatocyte growth factor receptor	MET	ATFPEDQFPNSSQNGSCRQVQYPLTDMSPIL	sp|P08581|MET_HUMAN Hepatocyte growth factor receptor OS=Homo sapiens OX=9606 GN=MET PE=1 SV=4;sp|P08581-2|MET_HUMAN Isoform 2 of Hepatocyte growth factor receptor OS=Homo sapiens OX=9606 GN=MET	1	1080	0	NaN	NaN	NaN	NaN	NaN	NaN	NaN	NaN	NaN	NaN	NaN	NaN	NaN	NaN	NaN	NaN	NaN
UID4649	S	3	___1	TLPS(0.001)T(0.013)S(0.041)S(0.028)S(0.107)GS(0.81)KR	0.810031	0.00693665	59.673	31.04	59.673	0.18582	82190000	270	NaN	0	0	NaN	0.810031	0.445195	0	NaN	NaN	P08651-2;P08651;P08651-5;P08651-3;P08651-6;P08651-4	270;279;279;270;279;246	P08651-2	P08651-2	Nuclear factor 1 C-type	NFIC	STGLRRTLPSTSSSGSKRHKSGSMEEDVDTS	sp|P08651-2|NFIC_HUMAN Isoform 1 of Nuclear factor 1 C-type OS=Homo sapiens OX=9606 GN=NFIC;sp|P08651|NFIC_HUMAN Nuclear factor 1 C-type OS=Homo sapiens OX=9606 GN=NFIC PE=1 SV=2;sp|P08651-5|NFIC_HUMAN Isoform 5 of Nuclear factor 1 C-type OS=Homo sapiens O	1	1084	0	NaN	NaN	NaN	NaN	NaN	NaN	NaN	NaN	NaN	NaN	NaN	NaN	NaN	NaN	NaN	NaN	NaN
UID4679	S	4	___1	FVS(0.693)S(0.195)S(0.057)S(0.022)S(0.023)GAY(0.003)GGGY(0.003)GGVLT(0.003)ASDGLLAGNEK	0.693069	8.58e-07	67.064	52.295	67.064	-0.68521	25021000	54	0	0	NaN	NaN	0.693069	0	NaN	0.658695	0	P08727	54	P08727	P08727	Keratin, type I cytoskeletal 19	KRT19	GSGGRGVSVSSARFVSSSSSGAYGGGYGGVL	sp|P08727|K1C19_HUMAN Keratin, type I cytoskeletal 19 OS=Homo sapiens OX=9606 GN=KRT19 PE=1 SV=4	1	1087	0	NaN	NaN	NaN	NaN	NaN	NaN	NaN	NaN	NaN	NaN	NaN	NaN	NaN	NaN	NaN	NaN	NaN
UID4685	S	3	___1	ET(0.101)S(0.899)GNLEQLLLAVVK	0.898956	1.35e-30	163.35	149.45	163.35	1.3521	28191000	230	NaN	NaN	NaN	0.5	NaN	0.898956	NaN	NaN	NaN	P08758	230	P08758	P08758	Annexin A5	ANXA5	TISGFQIEETIDRETSGNLEQLLLAVVKSIR	sp|P08758|ANXA5_HUMAN Annexin A5 OS=Homo sapiens OX=9606 GN=ANXA5 PE=1 SV=2	1	1088	0	NaN	NaN	NaN	NaN	NaN	NaN	NaN	NaN	NaN	NaN	NaN	NaN	NaN	NaN	NaN	NaN	NaN
UID4707	S	3	___1	LVIIES(1)DLER	1	2.98e-07	104.24	86.084	104.24	0.56131	67821000	174	1	NaN	NaN	NaN	1	NaN	0	1	NaN	P09493-9;P09493-3;P09493-4;P09493-10;P09493;P09493-2;P09493-8;P09493-7;P09493-5;P09493-6	174;174;174;174;174;118;174;174;138;174	P09493-9	P09493-9	Tropomyosin alpha-1 chain	TPM1	DRKYEEVARKLVIIESDLERAEERAELSEGK	sp|P09493-9|TPM1_HUMAN Isoform 9 of Tropomyosin alpha-1 chain OS=Homo sapiens OX=9606 GN=TPM1;sp|P09493-3|TPM1_HUMAN Isoform 3 of Tropomyosin alpha-1 chain OS=Homo sapiens OX=9606 GN=TPM1;sp|P09493-4|TPM1_HUMAN Isoform 4 of Tropomyosin alpha-1 chain OS=Hom	1	1102	0	NaN	NaN	NaN	NaN	NaN	NaN	NaN	NaN	NaN	NaN	NaN	NaN	NaN	NaN	NaN	NaN	NaN
UID4716	S	3	___1	S(0.003)ET(0.022)S(0.145)GS(0.831)FEDALLAIVK	0.830598	9.82e-05	94.882	78.454	94.882	0.10895	6396600	231	0	0.829106	NaN	NaN	0.830598	0.290463	NaN	NaN	NaN	P09525;P09525-2	231;149	P09525	P09525	Annexin A4	ANXA4	SQKDIEQSIKSETSGSFEDALLAIVKCMRNK	sp|P09525|ANXA4_HUMAN Annexin A4 OS=Homo sapiens OX=9606 GN=ANXA4 PE=1 SV=4;sp|P09525-2|ANXA4_HUMAN Isoform 2 of Annexin A4 OS=Homo sapiens OX=9606 GN=ANXA4	1	1104	0	NaN	NaN	NaN	NaN	NaN	NaN	NaN	NaN	NaN	NaN	NaN	NaN	NaN	NaN	NaN	NaN	NaN
UID4775	S	4	___1	SSQTSQNQGLGRPTLEGDEET(0.017)S(0.982)EVEYTVNK	0.982171	7.77e-104	203.38	173.25	195.09	0.52026	137760000	144	0.982171	0	NaN	NaN	0.84795	0	NaN	NaN	NaN	P0CAP2-3;P0CAP2;Q9BZD3	144;144;144	P0CAP2-3	P0CAP2-3	DNA-directed RNA polymerase II subunit GRINL1A;Putative GRINL1B complex locus protein 2	POLR2M;GCOM2	NQGLGRPTLEGDEETSEVEYTVNKGPASSNR	sp|P0CAP2-3|GRL1A_HUMAN Isoform 3 of DNA-directed RNA polymerase II subunit GRINL1A OS=Homo sapiens OX=9606 GN=POLR2M;sp|P0CAP2|GRL1A_HUMAN DNA-directed RNA polymerase II subunit GRINL1A OS=Homo sapiens OX=9606 GN=POLR2M PE=1 SV=1;sp|Q9BZD3|GCOM2_HUMAN Put	1	1128	0	NaN	NaN	NaN	NaN	NaN	NaN	NaN	NaN	NaN	NaN	NaN	NaN	NaN	NaN	NaN	NaN	NaN
UID4796	S	3	___1	QES(1)GGDGEVEEYLSFR	1	0.000192498	87.208	65.054	87.208	-0.055712	23552000	35	NaN	0	NaN	0	NaN	1	NaN	NaN	NaN	P0DP91;Q03468	35;35	P0DP91;Q03468	Q03468	DNA excision repair protein ERCC-6	ERCC6	SQPVSNNEEMAIKQESGGDGEVEEYLSFRSV	sp|P0DP91|ERPG3_HUMAN Chimeric ERCC6-PGBD3 protein OS=Homo sapiens OX=9606 GN=ERCC6 PE=1 SV=1;sp|Q03468|ERCC6_HUMAN DNA excision repair protein ERCC-6 OS=Homo sapiens OX=9606 GN=ERCC6 PE=1 SV=1	1	1136;2476	0	NaN	NaN	NaN	NaN	NaN	NaN	NaN	NaN	NaN	NaN	NaN	NaN	NaN	NaN	NaN	NaN	NaN
UID4853	S	4	___1	MIKPFFHS(0.999)LS(0.001)EK	0.99913	1.27e-08	127.83	104.2	127.83	0.14029	56855000	44	NaN	NaN	NaN	NaN	0.993406	0.946288	NaN	0.99913	NaN	P10599	44	P10599	P10599	Thioredoxin	TXN	ATWCGPCKMIKPFFHSLSEKYSNVIFLEVDV	sp|P10599|THIO_HUMAN Thioredoxin OS=Homo sapiens OX=9606 GN=TXN PE=1 SV=3	1	1158	0	NaN	NaN	NaN	NaN	NaN	NaN	NaN	NaN	NaN	NaN	NaN	NaN	NaN	NaN	NaN	NaN	NaN
UID4854	S	4	___1	MIKPFFHS(0.004)LS(0.996)EK	0.995965	0.000448312	84.842	56.873	84.842	0.47296	17957000	46	NaN	NaN	NaN	NaN	0.995965	NaN	NaN	NaN	NaN	P10599	46	P10599	P10599	Thioredoxin	TXN	WCGPCKMIKPFFHSLSEKYSNVIFLEVDVDD	sp|P10599|THIO_HUMAN Thioredoxin OS=Homo sapiens OX=9606 GN=TXN PE=1 SV=3	1	1158	0	NaN	NaN	NaN	NaN	NaN	NaN	NaN	NaN	NaN	NaN	NaN	NaN	NaN	NaN	NaN	NaN	NaN
UID4867	S	3	___1	RNIQQY(0.273)NS(0.726)FVS(0.001)LSV	0.725958	8.29e-06	109.22	90.6	109.22	0.78023	9554200	375	NaN	0	NaN	0	0.725958	NaN	NaN	NaN	NaN	P10644	375	P10644	P10644	cAMP-dependent protein kinase type I-alpha regulatory subunit;cAMP-dependent protein kinase type I-alpha regulatory subunit, N-terminally processed	PRKAR1A	GPCSDILKRNIQQYNSFVSLSV_________	sp|P10644|KAP0_HUMAN cAMP-dependent protein kinase type I-alpha regulatory subunit OS=Homo sapiens OX=9606 GN=PRKAR1A PE=1 SV=1	1	1161	0	NaN	NaN	NaN	NaN	NaN	NaN	NaN	NaN	NaN	NaN	NaN	NaN	NaN	NaN	NaN	NaN	NaN
UID4980	S	4	___1	AEPAS(1)PDS(0.998)PKGS(0.002)SETETEPPVALAPGPAPTR	0.999993	9.8e-39	139.96	121.64	139.96	-0.016807	1693100000	19	0.978684	0.996257	0.70541	NaN	0.9762	0.999993	0.999188	0.9996	0.999859	P11474-2;P11474	19;19	P11474-2	P11474-2	Steroid hormone receptor ERR1	ESRRA	QVVGIEPLYIKAEPASPDSPKGSSETETEPP	sp|P11474-2|ERR1_HUMAN Isoform 2 of Steroid hormone receptor ERR1 OS=Homo sapiens OX=9606 GN=ESRRA;sp|P11474|ERR1_HUMAN Steroid hormone receptor ERR1 OS=Homo sapiens OX=9606 GN=ESRRA PE=1 SV=3	1;2;3	1188	0	NaN	NaN	NaN	NaN	NaN	NaN	NaN	NaN	NaN	NaN	NaN	NaN	NaN	NaN	NaN	NaN	NaN
UID5016	S	3	___1	DEEVS(0.135)S(0.865)ADISSSSEVISQHLVSYR	0.86496	9.33e-16	108.75	95.563	108.75	0.38429	83413000	523	NaN	NaN	NaN	NaN	0.82264	NaN	0	NaN	0.86496	P12270;P12270-2	523;523	P12270	P12270	Nucleoprotein TPR	TPR	EEARGNHVIRDEEVSSADISSSSEVISQHLV	sp|P12270|TPR_HUMAN Nucleoprotein TPR OS=Homo sapiens OX=9606 GN=TPR PE=1 SV=3;sp|P12270-2|TPR_HUMAN Isoform 2 of Nucleoprotein TPR OS=Homo sapiens OX=9606 GN=TPR	1	1201	0	NaN	NaN	NaN	NaN	NaN	NaN	NaN	NaN	NaN	NaN	NaN	NaN	NaN	NaN	NaN	NaN	NaN
UID5127	S	4	___1	VADAKGDS(1)ES(1)EEDEDLEVPVPSR	1	2.01e-106	221.73	207.4	202.14	-0.31255	172240000000	78	1	1	1	1	1	1	1	1	1	P13861-2;P13861	78;78	P13861-2	P13861-2	cAMP-dependent protein kinase type II-alpha regulatory subunit	PRKAR2A	PPEPGPDRVADAKGDSESEEDEDLEVPVPSR	sp|P13861-2|KAP2_HUMAN Isoform 2 of cAMP-dependent protein kinase type II-alpha regulatory subunit OS=Homo sapiens OX=9606 GN=PRKAR2A;sp|P13861|KAP2_HUMAN cAMP-dependent protein kinase type II-alpha regulatory subunit OS=Homo sapiens OX=9606 GN=PRKAR2A PE=	1;2	1237	0	NaN	NaN	NaN	NaN	NaN	NaN	NaN	NaN	NaN	NaN	NaN	NaN	NaN	NaN	NaN	NaN	NaN
UID5155	S	3	___1	GLFDEY(0.005)GS(0.995)K	0.994741	0.00825135	60.518	41.904	60.49	0.080364	21085000	403	NaN	NaN	NaN	NaN	0.994741	0.947778	NaN	NaN	0.975887	P14625;Q58FF3	403;60	P14625	P14625	Endoplasmin;Putative endoplasmin-like protein	HSP90B1;HSP90B2P	FVPTSAPRGLFDEYGSKKSDYIKLYVRRVFI	sp|P14625|ENPL_HUMAN Endoplasmin OS=Homo sapiens OX=9606 GN=HSP90B1 PE=1 SV=1;sp|Q58FF3|ENPLL_HUMAN Putative endoplasmin-like protein OS=Homo sapiens OX=9606 GN=HSP90B2P PE=5 SV=1	1	1248	0	NaN	NaN	NaN	NaN	NaN	NaN	NaN	NaN	NaN	NaN	NaN	NaN	NaN	NaN	NaN	NaN	NaN
UID5161	S	3	___1	IDT(0.403)PS(0.597)LEEPSDLEELEQFAK	0.597452	7.96e-10	124.86	107.37	124.86	0.24735	14762000	278	NaN	0	NaN	NaN	0.597452	0	0	NaN	NaN	P14859-4;P14859-5;P14859-3;P14859;P14859-2;P14859-6	278;238;276;278;290;301	P14859-4	P14859-4	POU domain, class 2, transcription factor 1	POU2F1	TLPQSQSTPKRIDTPSLEEPSDLEELEQFAK	sp|P14859-4|PO2F1_HUMAN Isoform 4 of POU domain, class 2, transcription factor 1 OS=Homo sapiens OX=9606 GN=POU2F1;sp|P14859-5|PO2F1_HUMAN Isoform 5 of POU domain, class 2, transcription factor 1 OS=Homo sapiens OX=9606 GN=POU2F1;sp|P14859-3|PO2F1_HUMAN Is	1	1250	0	NaN	NaN	NaN	NaN	NaN	NaN	NaN	NaN	NaN	NaN	NaN	NaN	NaN	NaN	NaN	NaN	NaN
UID5165	S	3	___1	TIAATPIQTLPQS(0.002)QS(0.66)T(0.338)PK	0.659639	1.44e-11	135.04	95.901	135.04	-0.094865	228150000	269	NaN	NaN	NaN	NaN	NaN	0.659639	0	NaN	0	P14859-4;P14859-5;P14859-3;P14859;P14859-2;P14859-6	269;229;267;269;281;292	P14859-4	P14859-4	POU domain, class 2, transcription factor 1	POU2F1	RTIAATPIQTLPQSQSTPKRIDTPSLEEPSD	sp|P14859-4|PO2F1_HUMAN Isoform 4 of POU domain, class 2, transcription factor 1 OS=Homo sapiens OX=9606 GN=POU2F1;sp|P14859-5|PO2F1_HUMAN Isoform 5 of POU domain, class 2, transcription factor 1 OS=Homo sapiens OX=9606 GN=POU2F1;sp|P14859-3|PO2F1_HUMAN Is	1	1250	0	NaN	NaN	NaN	NaN	NaN	NaN	NaN	NaN	NaN	NaN	NaN	NaN	NaN	NaN	NaN	NaN	NaN
UID5213	S	2	___1	ENS(0.247)S(0.247)S(0.506)QDPQTEGTR	0.506259	1.14e-30	181.97	148.78	181.97	-0.28821	19401000	355	NaN	NaN	NaN	NaN	0.506259	NaN	NaN	NaN	NaN	P15151-3;P15151-2;P15151	355;363;408	P15151-3	P15151-3	Poliovirus receptor	PVR	NGHVSYSAVSRENSSSQDPQTEGTR______	sp|P15151-3|PVR_HUMAN Isoform Gamma of Poliovirus receptor OS=Homo sapiens OX=9606 GN=PVR;sp|P15151-2|PVR_HUMAN Isoform Beta of Poliovirus receptor OS=Homo sapiens OX=9606 GN=PVR;sp|P15151|PVR_HUMAN Poliovirus receptor OS=Homo sapiens OX=9606 GN=PVR PE=1 S	1	1258	0	NaN	NaN	NaN	NaN	NaN	NaN	NaN	NaN	NaN	NaN	NaN	NaN	NaN	NaN	NaN	NaN	NaN
UID5220	S	2	___1	ELS(1)EQIQR	1	0.00648468	82.417	45.992	71.066	-0.0045022	51401000	366	NaN	NaN	NaN	NaN	1	NaN	NaN	NaN	1	P15311	366	P15311	P15311	Ezrin	EZR	LQDYEEKTKKAERELSEQIQRALQLEEERKR	sp|P15311|EZRI_HUMAN Ezrin OS=Homo sapiens OX=9606 GN=EZR PE=1 SV=4	1	1262	0	NaN	NaN	NaN	NaN	NaN	NaN	NaN	NaN	NaN	NaN	NaN	NaN	NaN	NaN	NaN	NaN	NaN
UID5234	S	3	___1	KS(0.167)S(0.622)S(0.167)S(0.045)SGDPSSDPLGSPTLLAL	0.621657	6.41e-59	189.62	168.39	180.7	-0.22371	120490000	252	0.466666	0.387992	0.450892	0.432502	0	0.621657	0.449554	0.461416	0.411268	P15407;P15407-2	252;150	P15407	P15407	Fos-related antigen 1	FOSL1	YPSTPEPCASAHRKSSSSSGDPSSDPLGSPT	sp|P15407|FOSL1_HUMAN Fos-related antigen 1 OS=Homo sapiens OX=9606 GN=FOSL1 PE=1 SV=1;sp|P15407-2|FOSL1_HUMAN Isoform 2 of Fos-related antigen 1 OS=Homo sapiens OX=9606 GN=FOSL1	1	1265	0	NaN	NaN	NaN	NaN	NaN	NaN	NaN	NaN	NaN	NaN	NaN	NaN	NaN	NaN	NaN	NaN	NaN
UID5269	S	3	___1	MLS(0.006)PANS(0.994)LDIAMEK	0.993726	0.000241147	84.035	69.345	68.129	-0.38761	100940000	1753	NaN	0.98867	NaN	NaN	0.989863	NaN	0.993726	NaN	NaN	P15822	1753	P15822	P15822	Zinc finger protein 40	HIVEP1	QESSASSKRMLSPANSLDIAMEKHQKRAKDE	sp|P15822|ZEP1_HUMAN Zinc finger protein 40 OS=Homo sapiens OX=9606 GN=HIVEP1 PE=1 SV=3	1	1273	0	NaN	NaN	NaN	NaN	NaN	NaN	NaN	NaN	NaN	NaN	NaN	NaN	NaN	NaN	NaN	NaN	NaN
UID5284	S	3	___1	WRS(1)EGADPAK	1	0.00056578	92.611	60.113	58.274	-0.1426	149450000	148	NaN	0	1	1	NaN	1	1	0	1	P15822	148	P15822	P15822	Zinc finger protein 40	HIVEP1	KPLFLQQPSELRRWRSEGADPAKFSDLDEQC	sp|P15822|ZEP1_HUMAN Zinc finger protein 40 OS=Homo sapiens OX=9606 GN=HIVEP1 PE=1 SV=3	1	1273	0	NaN	NaN	NaN	NaN	NaN	NaN	NaN	NaN	NaN	NaN	NaN	NaN	NaN	NaN	NaN	NaN	NaN
UID5300	S	3	___1	GGGGYTCQS(0.009)GS(0.991)GWDEFTK	0.99111	1.54e-05	101.48	90.207	101.48	0.48658	57104000	178	0	0	0	0.97992	0	0.99111	0	0	0	P15924;P15924-2;P15924-3	178;178;178	P15924	P15924	Desmoplakin	DSP	RASSKGGGGYTCQSGSGWDEFTKHVTSECLG	sp|P15924|DESP_HUMAN Desmoplakin OS=Homo sapiens OX=9606 GN=DSP PE=1 SV=3;sp|P15924-2|DESP_HUMAN Isoform DPII of Desmoplakin OS=Homo sapiens OX=9606 GN=DSP;sp|P15924-3|DESP_HUMAN Isoform DSPIa of Desmoplakin OS=Homo sapiens OX=9606 GN=DSP	1	1276	0	NaN	NaN	NaN	NaN	NaN	NaN	NaN	NaN	NaN	NaN	NaN	NaN	NaN	NaN	NaN	NaN	NaN
UID5310	S	3	___1	KRS(1)EDDLR	1	0.00617317	74.46	52.911	43.604	0.03406	621580000	1629	0	NaN	0	NaN	1	0	NaN	NaN	1	P15924	1629	P15924	P15924	Desmoplakin	DSP	NLTQQLEQASIVKKRSEDDLRQQRDVLDGHL	sp|P15924|DESP_HUMAN Desmoplakin OS=Homo sapiens OX=9606 GN=DSP PE=1 SV=3	1	1276	0	NaN	NaN	NaN	NaN	NaN	NaN	NaN	NaN	NaN	NaN	NaN	NaN	NaN	NaN	NaN	NaN	NaN
UID5448	S	3	___1	TFLAILS(0.002)ES(0.998)PFSEK	0.997601	4.35e-05	93.754	67.636	93.754	0.47786	3548400	287	NaN	NaN	NaN	NaN	NaN	0.828715	0.773354	NaN	0.997601	P17040-4;P17040-2;P17040-3;P17040	287;275;341;341	P17040-4	P17040-4	Zinc finger and SCAN domain-containing protein 20	ZSCAN20	WGYEETKTFLAILSESPFSEKLRTCHQNRQV	sp|P17040-4|ZSC20_HUMAN Isoform 4 of Zinc finger and SCAN domain-containing protein 20 OS=Homo sapiens OX=9606 GN=ZSCAN20;sp|P17040-2|ZSC20_HUMAN Isoform 2 of Zinc finger and SCAN domain-containing protein 20 OS=Homo sapiens OX=9606 GN=ZSCAN20;sp|P17040-3|	1	1306	0	NaN	NaN	NaN	NaN	NaN	NaN	NaN	NaN	NaN	NaN	NaN	NaN	NaN	NaN	NaN	NaN	NaN
UID5473	S	3	___1	S(1)RDAT(1)PPVS(1)PINMEDQER	1	6.54e-06	114.64	104.05	67.31	0.19306	5323600000	259	1	1	1	1	1	1	1	1	1	P17275	259	P17275	P17275	Transcription factor jun-B	JUNB	QTVPEARSRDATPPVSPINMEDQERIKVERK	sp|P17275|JUNB_HUMAN Transcription factor jun-B OS=Homo sapiens OX=9606 GN=JUNB PE=1 SV=1	1;2;3	1316	0	NaN	NaN	NaN	NaN	NaN	NaN	NaN	NaN	NaN	NaN	NaN	NaN	NaN	NaN	NaN	NaN	NaN
UID5477	S	4	___1	KLAAGHELQPLAIVDQRPS(0.5)S(0.5)R	0.5	5.62e-06	82.904	63.007	82.904	0.5451	38501000	365	NaN	NaN	NaN	NaN	NaN	0.5	NaN	NaN	NaN	P17302	365	P17302	P17302	Gap junction alpha-1 protein	GJA1	GHELQPLAIVDQRPSSRASSRASSRPRPDDL	sp|P17302|CXA1_HUMAN Gap junction alpha-1 protein OS=Homo sapiens OX=9606 GN=GJA1 PE=1 SV=2	1	1317	0	NaN	NaN	NaN	NaN	NaN	NaN	NaN	NaN	NaN	NaN	NaN	NaN	NaN	NaN	NaN	NaN	NaN
UID5573	S	2	___1	VVQEY(0.002)IDAFS(0.556)DY(0.442)ANFK	0.555962	0.000935928	63.408	45.972	63.408	-0.30502	2977800	787	NaN	0.536284	NaN	NaN	0	0.555962	NaN	0	NaN	P18433-6;P18433	787;796	P18433-6	P18433-6	Receptor-type tyrosine-protein phosphatase alpha	PTPRA	YEFCYKVVQEYIDAFSDYANFK_________	sp|P18433-6|PTPRA_HUMAN Isoform 2 of Receptor-type tyrosine-protein phosphatase alpha OS=Homo sapiens OX=9606 GN=PTPRA;sp|P18433|PTPRA_HUMAN Receptor-type tyrosine-protein phosphatase alpha OS=Homo sapiens OX=9606 GN=PTPRA PE=1 SV=3	1	1344	0	NaN	NaN	NaN	NaN	NaN	NaN	NaN	NaN	NaN	NaN	NaN	NaN	NaN	NaN	NaN	NaN	NaN
UID5754	S	3	___1	FRS(1)LIPSYIR	0.999998	0.00307501	71.879	45.092	71.879	-0.45726	27421000	77	0.999998	NaN	NaN	NaN	0.999954	NaN	NaN	0.999964	NaN	P20340-2;P20340;P20340-4;Q9NRW1;Q9NRW1-2	77;77;44;77;64	P20340-2	P20340-2	Ras-related protein Rab-6A;Ras-related protein Rab-6B	RAB6A;RAB6B	IRLQLWDTAGQERFRSLIPSYIRDSAAAVVV	sp|P20340-2|RAB6A_HUMAN Isoform 2 of Ras-related protein Rab-6A OS=Homo sapiens OX=9606 GN=RAB6A;sp|P20340|RAB6A_HUMAN Ras-related protein Rab-6A OS=Homo sapiens OX=9606 GN=RAB6A PE=1 SV=3;sp|P20340-4|RAB6A_HUMAN Isoform 4 of Ras-related protein Rab-6A OS=	1	1385	0	NaN	NaN	NaN	NaN	NaN	NaN	NaN	NaN	NaN	NaN	NaN	NaN	NaN	NaN	NaN	NaN	NaN
UID5795	S	4	___1	LAAAISEVVSQTPAS(0.779)T(0.179)T(0.042)QAGAPPR	0.778623	1.77e-18	125.83	111.14	125.83	-0.013731	13435000	597	NaN	NaN	NaN	NaN	0	0.778623	NaN	NaN	0.454061	P20810-9;P20810-10;P20810-7;P20810-6;P20810-4;P20810-8;P20810;P20810-5;P20810-2;P20810-3	591;610;613;632;508;527;549;597;536;431	P20810-9;P20810-5	P20810-5	Calpastatin	CAST	KLAAAISEVVSQTPASTTQAGAPPRDTSQSD	sp|P20810-9|ICAL_HUMAN Isoform 9 of Calpastatin OS=Homo sapiens OX=9606 GN=CAST;sp|P20810-10|ICAL_HUMAN Isoform 10 of Calpastatin OS=Homo sapiens OX=9606 GN=CAST;sp|P20810-7|ICAL_HUMAN Isoform 7 of Calpastatin OS=Homo sapiens OX=9606 GN=CAST;sp|P20810-6|IC	1	1393;1394	0	NaN	NaN	NaN	NaN	NaN	NaN	NaN	NaN	NaN	NaN	NaN	NaN	NaN	NaN	NaN	NaN	NaN
UID5802	S	3	___1	S(1)IKEVDEAK	1	3.15e-06	167.98	82.14	167.98	0.059674	50546000	359	NaN	NaN	NaN	NaN	1	NaN	NaN	NaN	NaN	P20810-9;P20810-10;P20810-7;P20810-6;P20810-4;P20810-8;P20810;P20810-5;P20810-2;P20810-3	353;372;375;394;270;289;311;359;298;193	P20810-9;P20810-5	P20810-5	Calpastatin	CAST	ASLGTRQAEPELDLRSIKEVDEAKAKEEKLE	sp|P20810-9|ICAL_HUMAN Isoform 9 of Calpastatin OS=Homo sapiens OX=9606 GN=CAST;sp|P20810-10|ICAL_HUMAN Isoform 10 of Calpastatin OS=Homo sapiens OX=9606 GN=CAST;sp|P20810-7|ICAL_HUMAN Isoform 7 of Calpastatin OS=Homo sapiens OX=9606 GN=CAST;sp|P20810-6|IC	1	1393;1394	0	NaN	NaN	NaN	NaN	NaN	NaN	NaN	NaN	NaN	NaN	NaN	NaN	NaN	NaN	NaN	NaN	NaN
UID5804	S	2	___1	S(1)QPGQKPAAS(1)PRPR	1	7.1e-13	85.166	70.747	44.294	0.41138	1886200000	2	1	1	1	1	1	1	1	1	1	P20810-9;P20810-10;P20810-7;P20810-6;P20810-5	2;2;2;2;2	P20810-9;P20810-5	P20810-5	Calpastatin	CAST	______________MSQPGQKPAASPRPRRA	sp|P20810-9|ICAL_HUMAN Isoform 9 of Calpastatin OS=Homo sapiens OX=9606 GN=CAST;sp|P20810-10|ICAL_HUMAN Isoform 10 of Calpastatin OS=Homo sapiens OX=9606 GN=CAST;sp|P20810-7|ICAL_HUMAN Isoform 7 of Calpastatin OS=Homo sapiens OX=9606 GN=CAST;sp|P20810-6|IC	1;2	1393;1394	0	NaN	NaN	NaN	NaN	NaN	NaN	NaN	NaN	NaN	NaN	NaN	NaN	NaN	NaN	NaN	NaN	NaN
UID5818	S	3	___1	GMGS(1)LDAMEK	1	0.000483424	86.911	64.918	86.911	-0.393	50496000	391	NaN	NaN	NaN	NaN	NaN	1	NaN	NaN	NaN	P20839-2;P20839-4;P20839;P20839-3;P20839-7;P20839-5;P20839-6	391;411;416;465;468;491;501	P20839-2	P20839-2	Inosine-5'-monophosphate dehydrogenase 1	IMPDH1	FFSDGVRLKKYRGMGSLDAMEKSSSSQKRYF	sp|P20839-2|IMDH1_HUMAN Isoform 2 of Inosine-5'-monophosphate dehydrogenase 1 OS=Homo sapiens OX=9606 GN=IMPDH1;sp|P20839-4|IMDH1_HUMAN Isoform 4 of Inosine-5'-monophosphate dehydrogenase 1 OS=Homo sapiens OX=9606 GN=IMPDH1;sp|P20839|IMDH1_HUMAN Inosine-5'	1	1396	0	NaN	NaN	NaN	NaN	NaN	NaN	NaN	NaN	NaN	NaN	NaN	NaN	NaN	NaN	NaN	NaN	NaN
UID5860	S	3	___1	SPFSVAVS(0.71)PS(0.29)LDLSK	0.709874	1.06e-11	136.39	117.56	136.39	0.08404	319770000	966	NaN	NaN	NaN	0.686096	0.709874	NaN	NaN	NaN	NaN	P21333-2;P21333	966;966	P21333-2	P21333-2	Filamin-A	FLNA	YGGDPIPKSPFSVAVSPSLDLSKIKVSGLGE	sp|P21333-2|FLNA_HUMAN Isoform 2 of Filamin-A OS=Homo sapiens OX=9606 GN=FLNA;sp|P21333|FLNA_HUMAN Filamin-A OS=Homo sapiens OX=9606 GN=FLNA PE=1 SV=4	1	1403	0	NaN	NaN	NaN	NaN	NaN	NaN	NaN	NaN	NaN	NaN	NaN	NaN	NaN	NaN	NaN	NaN	NaN
UID5864	S	3	___1	VGS(1)AADIPINISETDLSLLTATVVPPSGR	0.999991	6.38e-14	97.609	88.79	97.609	0.42096	112260000	1959	0	0	NaN	0	0.999991	NaN	NaN	NaN	NaN	P21333-2;P21333	1959;1967	P21333-2	P21333-2	Filamin-A	FLNA	VTGDDSMRMSHLKVGSAADIPINISETDLSL	sp|P21333-2|FLNA_HUMAN Isoform 2 of Filamin-A OS=Homo sapiens OX=9606 GN=FLNA;sp|P21333|FLNA_HUMAN Filamin-A OS=Homo sapiens OX=9606 GN=FLNA PE=1 SV=4	1	1403	0	NaN	NaN	NaN	NaN	NaN	NaN	NaN	NaN	NaN	NaN	NaN	NaN	NaN	NaN	NaN	NaN	NaN
UID5872	S	4	___1	KGS(0.998)MIS(0.991)VMS(0.523)S(0.482)EGNADT(0.005)PVSK	0.998485	8.23e-34	165.48	147.53	66.501	0.11936	369470000	876	0	0	0.985264	NaN	0.977131	0.926713	0.998485	NaN	0.998249	P21359-2;P21359-6;P21359;P21359-4	876;876;876;876	P21359-2	P21359-2	Neurofibromin;Neurofibromin truncated	NF1	ATYSPPMGPVSERKGSMISVMSSEGNADTPV	sp|P21359-2|NF1_HUMAN Isoform 1 of Neurofibromin OS=Homo sapiens OX=9606 GN=NF1;sp|P21359-6|NF1_HUMAN Isoform 6 of Neurofibromin OS=Homo sapiens OX=9606 GN=NF1;sp|P21359|NF1_HUMAN Neurofibromin OS=Homo sapiens OX=9606 GN=NF1 PE=1 SV=2;sp|P21359-4|NF1_HUMAN	1;2;3	1404	0	NaN	NaN	NaN	NaN	NaN	NaN	NaN	NaN	NaN	NaN	NaN	NaN	NaN	NaN	NaN	NaN	NaN
UID5907	S	3	___1	DGGGPGGDY(0.075)AAMGACPAS(0.909)EQGY(0.015)EEMR	0.909163	1.26e-15	101.42	96.325	101.42	-0.12396	26527000	642	NaN	NaN	0	NaN	0.909163	NaN	NaN	NaN	NaN	P21860-5;P21860-4;P21860	642;1226;1285	P21860-5	P21860-5	Receptor tyrosine-protein kinase erbB-3	ERBB3	GGPGGDYAAMGACPASEQGYEEMRAFQGPGH	sp|P21860-5|ERBB3_HUMAN Isoform 5 of Receptor tyrosine-protein kinase erbB-3 OS=Homo sapiens OX=9606 GN=ERBB3;sp|P21860-4|ERBB3_HUMAN Isoform 4 of Receptor tyrosine-protein kinase erbB-3 OS=Homo sapiens OX=9606 GN=ERBB3;sp|P21860|ERBB3_HUMAN Receptor tyros	1	1414	0	NaN	NaN	NaN	NaN	NaN	NaN	NaN	NaN	NaN	NaN	NaN	NaN	NaN	NaN	NaN	NaN	NaN
UID5957	S	4	___1	IARLS(0.999)S(0.999)GEGPT(0.002)LANVSELELPADPK	0.998764	5.89e-22	138.16	116.3	138.16	0.14146	145880000	444	NaN	NaN	NaN	NaN	0.560599	0	0.97737	0.998764	0.998638	P22607-4;P22607;P22607-2;P22607-3	444;444;446;332	P22607-4	P22607-4	Fibroblast growth factor receptor 3	FGFR3	ASMSSNTPLVRIARLSSGEGPTLANVSELEL	sp|P22607-4|FGFR3_HUMAN Isoform 4 of Fibroblast growth factor receptor 3 OS=Homo sapiens OX=9606 GN=FGFR3;sp|P22607|FGFR3_HUMAN Fibroblast growth factor receptor 3 OS=Homo sapiens OX=9606 GN=FGFR3 PE=1 SV=1;sp|P22607-2|FGFR3_HUMAN Isoform 2 of Fibroblast g	1;2	1430	0	NaN	NaN	NaN	NaN	NaN	NaN	NaN	NaN	NaN	NaN	NaN	NaN	NaN	NaN	NaN	NaN	NaN
UID6017	S	2	___1	LS(0.912)IRCGGY(0.001)T(0.088)LK	0.911642	0.010146	63.408	33.1	63.408	3.8368	35547000	658	NaN	NaN	NaN	NaN	NaN	0.911642	NaN	NaN	NaN	P23497;P23497-3;P23497-4	658;658;658	P23497	P23497	Nuclear autoantigen Sp-100	SP100	FEIEGDRGASKNWKLSIRCGGYTLKVLMENK	sp|P23497|SP100_HUMAN Nuclear autoantigen Sp-100 OS=Homo sapiens OX=9606 GN=SP100 PE=1 SV=3;sp|P23497-3|SP100_HUMAN Isoform Sp100-B of Nuclear autoantigen Sp-100 OS=Homo sapiens OX=9606 GN=SP100;sp|P23497-4|SP100_HUMAN Isoform Sp100-C of Nuclear autoantige	1	1453	0	NaN	NaN	NaN	NaN	NaN	NaN	NaN	NaN	NaN	NaN	NaN	NaN	NaN	NaN	NaN	NaN	NaN
UID6051	S	3	___1	DRDDRS(1)FGR	1	0.00106556	91.784	55.481	91.784	0.33784	57155000	183	NaN	NaN	1	1	1	0	0	NaN	0	P23588;P23588-2	183;144	P23588	P23588	Eukaryotic translation initiation factor 4B	EIF4B	VDVADQAQDKDRDDRSFGRDRNRDSDKTDTD	sp|P23588|IF4B_HUMAN Eukaryotic translation initiation factor 4B OS=Homo sapiens OX=9606 GN=EIF4B PE=1 SV=2;sp|P23588-2|IF4B_HUMAN Isoform 2 of Eukaryotic translation initiation factor 4B OS=Homo sapiens OX=9606 GN=EIF4B	1	1458	0	NaN	NaN	NaN	NaN	NaN	NaN	NaN	NaN	NaN	NaN	NaN	NaN	NaN	NaN	NaN	NaN	NaN
UID6082	S	3	___1	TQDGVALEIQPLNS(1)QEGIDNEEK	1	2.94e-12	108.5	90.401	108.5	1.1984	16816000	316	NaN	NaN	NaN	NaN	1	NaN	NaN	NaN	NaN	P23634-7;P23634-6;P23634-8;P23634;P23634-5;P23634-4;P23634-3;P23634-2	316;328;316;328;316;328;316;328	P23634-7	P23634-7	Plasma membrane calcium-transporting ATPase 4	ATP2B4	AKTQDGVALEIQPLNSQEGIDNEEKDKKAVK	sp|P23634-7|AT2B4_HUMAN Isoform ZB of Plasma membrane calcium-transporting ATPase 4 OS=Homo sapiens OX=9606 GN=ATP2B4;sp|P23634-6|AT2B4_HUMAN Isoform XB of Plasma membrane calcium-transporting ATPase 4 OS=Homo sapiens OX=9606 GN=ATP2B4;sp|P23634-8|AT2B4_HU	1	1459	0	NaN	NaN	NaN	NaN	NaN	NaN	NaN	NaN	NaN	NaN	NaN	NaN	NaN	NaN	NaN	NaN	NaN
UID6091	S	4	___1	AEET(0.016)CAPS(0.973)VS(0.011)YFKCVQK	0.973478	0.0042769	57.366	41.593	57.366	-1.5165	145460000	41	NaN	NaN	NaN	NaN	NaN	0.973478	NaN	NaN	NaN	P24385	41	P24385	P24385	G1/S-specific cyclin-D1	CCND1	RVLRAMLKAEETCAPSVSYFKCVQKEVLPSM	sp|P24385|CCND1_HUMAN G1/S-specific cyclin-D1 OS=Homo sapiens OX=9606 GN=CCND1 PE=1 SV=1	1	1465	0	NaN	NaN	NaN	NaN	NaN	NaN	NaN	NaN	NaN	NaN	NaN	NaN	NaN	NaN	NaN	NaN	NaN
UID6146	S	3	___1	FQPHFGQQECVS(1)PYR	1	1.08e-30	164.94	156.12	164.94	-0.0037497	354950000	999	0	0	NaN	0	0.999999	1	NaN	0.999951	NaN	P25054-2;P25054-3;P25054	999;1082;1100	P25054-2	P25054-2	Adenomatous polyposis coli protein	APC	KHLKFQPHFGQQECVSPYRSRGANGSETNRV	sp|P25054-2|APC_HUMAN Isoform 2 of Adenomatous polyposis coli protein OS=Homo sapiens OX=9606 GN=APC;sp|P25054-3|APC_HUMAN Isoform 1B of Adenomatous polyposis coli protein OS=Homo sapiens OX=9606 GN=APC;sp|P25054|APC_HUMAN Adenomatous polyposis coli protei	1	1476	0	NaN	NaN	NaN	NaN	NaN	NaN	NaN	NaN	NaN	NaN	NaN	NaN	NaN	NaN	NaN	NaN	NaN
UID6203	S	2	___1	VLS(1)IGDGIAR	1	0.00152655	87.001	56.129	76.326	0.029001	149460000	76	1	1	1	1	NaN	0	1	1	0	P25705;P25705-2;P25705-3	76;26;76	P25705	P25705	ATP synthase subunit alpha, mitochondrial	ATP5A1	GADTSVDLEETGRVLSIGDGIARVHGLRNVQ	sp|P25705|ATPA_HUMAN ATP synthase subunit alpha, mitochondrial OS=Homo sapiens OX=9606 GN=ATP5F1A PE=1 SV=1;sp|P25705-2|ATPA_HUMAN Isoform 2 of ATP synthase subunit alpha, mitochondrial OS=Homo sapiens OX=9606 GN=ATP5F1A;sp|P25705-3|ATPA_HUMAN Isoform 3 of	1	1486	0	NaN	NaN	NaN	NaN	NaN	NaN	NaN	NaN	NaN	NaN	NaN	NaN	NaN	NaN	NaN	NaN	NaN
UID6316	S	3	___1	RES(1)FLYR	1	0.00521935	98.044	73.206	98.044	0.32098	72428000	126	NaN	NaN	NaN	1	0.999997	1	NaN	NaN	NaN	P27815-2;P27815-6;P27815-7;P27815;Q08493;Q08499-6;Q08499-7;Q08499-12;Q08499-2;Q08499-10;Q08499-9;Q08499-11;Q08499;Q07343-3;Q07343;Q08493-2;Q08493-3	119;84;123;145;119;126;126;126;54;60;68;129;190;118;133;13;87	P27815-2;Q08493;Q08499-6	Q08499-6	cAMP-specific 3',5'-cyclic phosphodiesterase 4A;cAMP-specific 3',5'-cyclic phosphodiesterase 4C;cAMP-specific 3',5'-cyclic phosphodiesterase 4D;cAMP-specific 3',5'-cyclic phosphodiesterase 4B	PDE4A;PDE4C;PDE4D;PDE4B	GLILQANFVHSQRRESFLYRSDSDYDLSPKS;GLVLHAGAATSQRRESFLYRSDSDYDMSPKT;GRIMQAPVPHSQRRESFLYRSDSDYELSPKA	sp|P27815-2|PDE4A_HUMAN Isoform 2 of cAMP-specific 3',5'-cyclic phosphodiesterase 4A OS=Homo sapiens OX=9606 GN=PDE4A;sp|P27815-6|PDE4A_HUMAN Isoform 6 of cAMP-specific 3',5'-cyclic phosphodiesterase 4A OS=Homo sapiens OX=9606 GN=PDE4A;sp|P27815-7|PDE4A_HU	1	1521;2561;2564	0	NaN	NaN	NaN	NaN	NaN	NaN	NaN	NaN	NaN	NaN	NaN	NaN	NaN	NaN	NaN	NaN	NaN
UID6331	S	3	___1	DMS(1)PLS(0.994)ET(0.006)EMALGK	0.993769	3.7e-21	157.68	139.27	117.37	-0.3315	3762800000	510	0.990992	0.993144	0.990034	0.98791	0.990337	0.993564	0.987862	0.993769	0.990393	P27816-6;P27816;P27816-2	510;510;510	P27816-6	P27816-6	Microtubule-associated protein 4	MAP4	STVKEVGLLKDMSPLSETEMALGKDVTPPPE	sp|P27816-6|MAP4_HUMAN Isoform 6 of Microtubule-associated protein 4 OS=Homo sapiens OX=9606 GN=MAP4;sp|P27816|MAP4_HUMAN Microtubule-associated protein 4 OS=Homo sapiens OX=9606 GN=MAP4 PE=1 SV=3;sp|P27816-2|MAP4_HUMAN Isoform 2 of Microtubule-associated	1;2;3	1522	0	NaN	NaN	NaN	NaN	NaN	NaN	NaN	NaN	NaN	NaN	NaN	NaN	NaN	NaN	NaN	NaN	NaN
UID6347	S	3	___1	T(0.002)T(0.002)T(0.015)LS(0.96)GT(0.021)APAAGVVPSR	0.959543	1.58e-05	109.03	89.702	109.03	0.15132	197370000	876	0	0.826862	0.848147	NaN	0.841594	0.959543	0	0.879675	0	P27816-6;P27816;P27816-2;P27816-4;P27816-5	876;876;703;611;603	P27816-6;P27816-4;P27816-5	P27816-6	Microtubule-associated protein 4	MAP4	PKSTSTSSMKKTTTLSGTAPAAGVVPSRVKA	sp|P27816-6|MAP4_HUMAN Isoform 6 of Microtubule-associated protein 4 OS=Homo sapiens OX=9606 GN=MAP4;sp|P27816|MAP4_HUMAN Microtubule-associated protein 4 OS=Homo sapiens OX=9606 GN=MAP4 PE=1 SV=3;sp|P27816-2|MAP4_HUMAN Isoform 2 of Microtubule-associated	1	1522;1523;1524	0	NaN	NaN	NaN	NaN	NaN	NaN	NaN	NaN	NaN	NaN	NaN	NaN	NaN	NaN	NaN	NaN	NaN
UID6352	S	3	___1	GT(0.018)LS(0.982)GWILSK	0.981926	0.000421363	91.961	42.594	91.961	0.0094757	5153600	116	NaN	0.981926	0.860901	NaN	NaN	0.499979	NaN	NaN	NaN	P27824-2;P27824	116;81	P27824-2	P27824-2	Calnexin	CANX	TGEVYFADSFDRGTLSGWILSKAKKDDTDDE	sp|P27824-2|CALX_HUMAN Isoform 2 of Calnexin OS=Homo sapiens OX=9606 GN=CANX;sp|P27824|CALX_HUMAN Calnexin OS=Homo sapiens OX=9606 GN=CANX PE=1 SV=2	1	1525	0	NaN	NaN	NaN	NaN	NaN	NaN	NaN	NaN	NaN	NaN	NaN	NaN	NaN	NaN	NaN	NaN	NaN
UID6363	S	4	___1	VEGGS(0.937)PT(0.063)LGLLGGSPSAQPGTGNVEAGIPSGR	0.936535	5.42e-22	105.75	95.364	105.75	-0.4822	188820000	447	0.936535	0	NaN	0	0.748522	0.773336	NaN	NaN	0.772844	P27987-2;P27987	447;447	P27987-2	P27987-2	Inositol-trisphosphate 3-kinase B	ITPKB	VGGGRWQLSDRVEGGSPTLGLLGGSPSAQPG	sp|P27987-2|IP3KB_HUMAN Isoform 2 of Inositol-trisphosphate 3-kinase B OS=Homo sapiens OX=9606 GN=ITPKB;sp|P27987|IP3KB_HUMAN Inositol-trisphosphate 3-kinase B OS=Homo sapiens OX=9606 GN=ITPKB PE=1 SV=5	1	1527	0	NaN	NaN	NaN	NaN	NaN	NaN	NaN	NaN	NaN	NaN	NaN	NaN	NaN	NaN	NaN	NaN	NaN
UID6449	S	4	___1	GPSYEDLYTQNVVINMDDQEDLHRAS(1)LEGK	1	6.41e-104	204.51	186.86	204.51	-0.41907	161370000	268	NaN	0	1	1	0.999999	NaN	NaN	NaN	NaN	P29083	268	P29083	P29083	General transcription factor IIE subunit 1	GTF2E1	NVVINMDDQEDLHRASLEGKSAKERPIWLRE	sp|P29083|T2EA_HUMAN General transcription factor IIE subunit 1 OS=Homo sapiens OX=9606 GN=GTF2E1 PE=1 SV=2	1	1545	0	NaN	NaN	NaN	NaN	NaN	NaN	NaN	NaN	NaN	NaN	NaN	NaN	NaN	NaN	NaN	NaN	NaN
UID6451	S	4	___1	SVT(0.003)VDS(0.997)MDEEKIEEYLK	0.996792	4.06e-05	102.33	79.188	102.33	-0.50474	43721000	227	NaN	NaN	NaN	NaN	0.996792	0.834339	NaN	NaN	0.930257	P29084	227	P29084	P29084	Transcription initiation factor IIE subunit beta	GTF2E2	VDEEFQKLWRSVTVDSMDEEKIEEYLKRQGI	sp|P29084|T2EB_HUMAN Transcription initiation factor IIE subunit beta OS=Homo sapiens OX=9606 GN=GTF2E2 PE=1 SV=1	1	1546	0	NaN	NaN	NaN	NaN	NaN	NaN	NaN	NaN	NaN	NaN	NaN	NaN	NaN	NaN	NaN	NaN	NaN
UID6453	S	3	___1	S(0.399)S(0.601)PVDLVTATDQK	0.600582	2.99e-19	151.07	120.5	151.07	0.36959	395480000	38	0	0	0.5	NaN	NaN	0.600582	0	NaN	NaN	P29218-2;P29218;P29218-3	38;38;97	P29218-2	P29218-2	Inositol monophosphatase 1	IMPA1	VCEAIKNEMNVMLKSSPVDLVTATDQKVEKM	sp|P29218-2|IMPA1_HUMAN Isoform 2 of Inositol monophosphatase 1 OS=Homo sapiens OX=9606 GN=IMPA1;sp|P29218|IMPA1_HUMAN Inositol monophosphatase 1 OS=Homo sapiens OX=9606 GN=IMPA1 PE=1 SV=1;sp|P29218-3|IMPA1_HUMAN Isoform 3 of Inositol monophosphatase 1 OS=	1	1547	0	NaN	NaN	NaN	NaN	NaN	NaN	NaN	NaN	NaN	NaN	NaN	NaN	NaN	NaN	NaN	NaN	NaN
UID6528	S	2	___1	QPS(1)PSPS(0.999)PT(0.001)ER	0.999424	3.62e-18	184.8	134.16	184.8	0.11098	1712600000	40	0.923471	0.998578	0.973464	0.987049	0.973795	0.986931	0.908267	0.997272	0.999424	P29590;P29590-5;P29590-9;P29590-10;P29590-13;P29590-14;P29590-2;P29590-3;P29590-8;P29590-4	40;40;40;40;40;40;40;40;40;40	P29590;P29590-13;P29590-14;P29590-2;P29590-3;P29590-4	P29590-3	Protein PML	PML	PPETPSEGRQPSPSPSPTERAPASEEEFQFL	sp|P29590|PML_HUMAN Protein PML OS=Homo sapiens OX=9606 GN=PML PE=1 SV=3;sp|P29590-5|PML_HUMAN Isoform PML-4 of Protein PML OS=Homo sapiens OX=9606 GN=PML;sp|P29590-9|PML_HUMAN Isoform PML-3 of Protein PML OS=Homo sapiens OX=9606 GN=PML;sp|P29590-10|PML_HU	1;2;3	1559;1560;1561;1562;1563;1564	0	NaN	NaN	NaN	NaN	NaN	NaN	NaN	NaN	NaN	NaN	NaN	NaN	NaN	NaN	NaN	NaN	NaN
UID6661	S	3	___1	FQS(1)LNADINK	1	0.000502844	89.231	43.974	89.231	-0.03219	10505000	72	NaN	NaN	NaN	NaN	1	NaN	NaN	NaN	NaN	P30740	72	P30740	P30740	Leukocyte elastase inhibitor	SERPINB1	TFHFNTVEEVHSRFQSLNADINKRGASYILK	sp|P30740|ILEU_HUMAN Leukocyte elastase inhibitor OS=Homo sapiens OX=9606 GN=SERPINB1 PE=1 SV=1	1	1601	0	NaN	NaN	NaN	NaN	NaN	NaN	NaN	NaN	NaN	NaN	NaN	NaN	NaN	NaN	NaN	NaN	NaN
UID6672	S	3	___1	APQTLPS(1)PEADALAGSK	0.99961	6.02e-05	94.837	68.689	94.837	-0.5025	146620000	159	NaN	0.979483	0	NaN	NaN	0.99961	NaN	NaN	0	P31274	159	P31274	P31274	Homeobox protein Hox-C9	HOXC9	GSPGELRDRAPQTLPSPEADALAGSKHKEEK	sp|P31274|HXC9_HUMAN Homeobox protein Hox-C9 OS=Homo sapiens OX=9606 GN=HOXC9 PE=1 SV=3	1	1611	0	NaN	NaN	NaN	NaN	NaN	NaN	NaN	NaN	NaN	NaN	NaN	NaN	NaN	NaN	NaN	NaN	NaN
UID6688	S	3	___1	LAS(0.989)PS(0.011)EVVQQVAEK	0.989469	1.22e-53	220.34	187.39	187.78	-0.29162	199170000	71	0.95093	0.965627	0.966485	0.83199	0.799448	0.735378	0.989469	0.966813	0.596876	P31629	71	P31629	P31629	Transcription factor HIVEP2	HIVEP2	GNTASAQLFGSGKLASPSEVVQQVAEKQYPP	sp|P31629|ZEP2_HUMAN Transcription factor HIVEP2 OS=Homo sapiens OX=9606 GN=HIVEP2 PE=1 SV=2	1	1617	0	NaN	NaN	NaN	NaN	NaN	NaN	NaN	NaN	NaN	NaN	NaN	NaN	NaN	NaN	NaN	NaN	NaN
UID6702	S	3	___1	EGGAGGGFGS(1)PMDIFDMFFGGGGR	1	1.04e-05	76.899	64.771	76.899	0.23475	79601000	83	NaN	0	1	NaN	1	0	NaN	NaN	1	P31689;P31689-2	83;83	P31689	P31689	DnaJ homolog subfamily A member 1	DNAJA1	GEQAIKEGGAGGGFGSPMDIFDMFFGGGGRM	sp|P31689|DNJA1_HUMAN DnaJ homolog subfamily A member 1 OS=Homo sapiens OX=9606 GN=DNAJA1 PE=1 SV=2;sp|P31689-2|DNJA1_HUMAN Isoform 2 of DnaJ homolog subfamily A member 1 OS=Homo sapiens OX=9606 GN=DNAJA1	1	1619	0	NaN	NaN	NaN	NaN	NaN	NaN	NaN	NaN	NaN	NaN	NaN	NaN	NaN	NaN	NaN	NaN	NaN
UID6707	S	3	___1	RPHFPQFS(0.121)YS(0.857)AS(0.022)GTA	0.856883	0.000113531	92.264	77.845	92.264	0.38775	63852000	413	NaN	NaN	0	0	0	0.856883	NaN	NaN	0	P31749-2;P31749	413;475	P31749-2	P31749-2	RAC-alpha serine/threonine-protein kinase	AKT1	CVDSERRPHFPQFSYSASGTA__________	sp|P31749-2|AKT1_HUMAN Isoform 2 of RAC-alpha serine/threonine-protein kinase OS=Homo sapiens OX=9606 GN=AKT1;sp|P31749|AKT1_HUMAN RAC-alpha serine/threonine-protein kinase OS=Homo sapiens OX=9606 GN=AKT1 PE=1 SV=2	1	1620	0	NaN	NaN	NaN	NaN	NaN	NaN	NaN	NaN	NaN	NaN	NaN	NaN	NaN	NaN	NaN	NaN	NaN
UID6712	S	3	___1	S(0.018)DGS(0.982)FIGYK	0.982019	0.00341502	70.942	53.21	70.942	0.19851	123260000	34	0.982019	NaN	NaN	0.802085	0.812471	0.91995	NaN	0.780369	NaN	P31751;P31751-2	34;34	P31751	P31751	RAC-beta serine/threonine-protein kinase	AKT2	IKTWRPRYFLLKSDGSFIGYKERPEAPDQTL	sp|P31751|AKT2_HUMAN RAC-beta serine/threonine-protein kinase OS=Homo sapiens OX=9606 GN=AKT2 PE=1 SV=2;sp|P31751-2|AKT2_HUMAN Isoform 2 of RAC-beta serine/threonine-protein kinase OS=Homo sapiens OX=9606 GN=AKT2	1	1621	0	NaN	NaN	NaN	NaN	NaN	NaN	NaN	NaN	NaN	NaN	NaN	NaN	NaN	NaN	NaN	NaN	NaN
UID6715	S	3	___1	T(0.014)VAS(0.986)PGVTVEEAVEQIDIGGVTLLR	0.985942	3.41e-109	220.13	199.16	220.13	-0.05038	57890000	112	NaN	NaN	NaN	NaN	NaN	0.833051	NaN	0.985942	0.799202	P31939;P31939-2	112;111	P31939	P31939	Bifunctional purine biosynthesis protein PURH;Phosphoribosylaminoimidazolecarboxamide formyltransferase;IMP cyclohydrolase	ATIC	RVVACNLYPFVKTVASPGVTVEEAVEQIDIG	sp|P31939|PUR9_HUMAN Bifunctional purine biosynthesis protein PURH OS=Homo sapiens OX=9606 GN=ATIC PE=1 SV=3;sp|P31939-2|PUR9_HUMAN Isoform 2 of Bifunctional purine biosynthesis protein PURH OS=Homo sapiens OX=9606 GN=ATIC	1	1624	0	NaN	NaN	NaN	NaN	NaN	NaN	NaN	NaN	NaN	NaN	NaN	NaN	NaN	NaN	NaN	NaN	NaN
UID6724	S	3	___1	GLPWSCS(1)ADEVQR	0.999666	5.23e-05	100.23	89.283	100.23	0.61769	83241000	23	0.987402	0.996174	NaN	NaN	0.999666	0	0	0	NaN	P31943	23	P31943	P31943	Heterogeneous nuclear ribonucleoprotein H;Heterogeneous nuclear ribonucleoprotein H, N-terminally processed	HNRNPH1	GEGFVVKVRGLPWSCSADEVQRFFSDCKIQN	sp|P31943|HNRH1_HUMAN Heterogeneous nuclear ribonucleoprotein H OS=Homo sapiens OX=9606 GN=HNRNPH1 PE=1 SV=4	1	1626	0	NaN	NaN	NaN	NaN	NaN	NaN	NaN	NaN	NaN	NaN	NaN	NaN	NaN	NaN	NaN	NaN	NaN
UID6771	S	3	___1	PCSEETPAIS(0.5)PS(0.5)KR	0.499937	2.27e-27	147.35	124.47	142.39	-0.14008	39271000	13	0	NaN	0	0	0	0.499937	0	0.497731	0	P33316-2	13	P33316-2	P33316-2	Deoxyuridine 5'-triphosphate nucleotidohydrolase, mitochondrial	DUT	___MPCSEETPAISPSKRARPAEVGGMQLRF	sp|P33316-2|DUT_HUMAN Isoform 2 of Deoxyuridine 5'-triphosphate nucleotidohydrolase, mitochondrial OS=Homo sapiens OX=9606 GN=DUT	1	1643	0	NaN	NaN	NaN	NaN	NaN	NaN	NaN	NaN	NaN	NaN	NaN	NaN	NaN	NaN	NaN	NaN	NaN
UID6834	S	3	___1	AAIIS(1)AEGDSK	0.999999	0.000576597	82.202	62.958	82.202	-0.10837	80795000	213	NaN	0.999998	0	0.999984	NaN	0.999996	0.999998	0.999999	0.999999	P35232	213	P35232	P35232	Prohibitin	PHB	FVVEKAEQQKKAAIISAEGDSKAAELIANSL	sp|P35232|PHB_HUMAN Prohibitin OS=Homo sapiens OX=9606 GN=PHB PE=1 SV=1	1	1659	0	NaN	NaN	NaN	NaN	NaN	NaN	NaN	NaN	NaN	NaN	NaN	NaN	NaN	NaN	NaN	NaN	NaN
UID6869	S	3	___1	S(0.913)GS(0.086)NT(0.001)GLDYIK	0.912785	9.21e-07	123.68	66.185	123.68	0.069613	90852000	378	NaN	NaN	NaN	NaN	NaN	0.912785	NaN	NaN	NaN	P35367	378	P35367	P35367	Histamine H1 receptor	HRH1	SDTTTETAPGKGKLRSGSNTGLDYIKFTWKR	sp|P35367|HRH1_HUMAN Histamine H1 receptor OS=Homo sapiens OX=9606 GN=HRH1 PE=1 SV=1	1	1673	0	NaN	NaN	NaN	NaN	NaN	NaN	NaN	NaN	NaN	NaN	NaN	NaN	NaN	NaN	NaN	NaN	NaN
UID6894	S	3	___1	HS(0.535)S(0.46)ET(0.005)FSSTPSATR	0.534976	2.96e-05	102.47	75.918	45.876	-0.79359	204140000	1100	NaN	0.380401	0.454374	0	NaN	0.534976	NaN	0	0	P35568	1100	P35568	P35568	Insulin receptor substrate 1	IRS1	AKVIRADPQGCRRRHSSETFSSTPSATRVGN	sp|P35568|IRS1_HUMAN Insulin receptor substrate 1 OS=Homo sapiens OX=9606 GN=IRS1 PE=1 SV=1	1	1679	0	NaN	NaN	NaN	NaN	NaN	NaN	NaN	NaN	NaN	NaN	NaN	NaN	NaN	NaN	NaN	NaN	NaN
UID6922	S	3	___1	QKLS(0.999)LS(0.001)TK	0.99896	0.00456028	78.692	45.283	78.692	0.030862	92627000	1326	NaN	NaN	NaN	NaN	0.99896	NaN	NaN	NaN	NaN	P35579	1326	P35579	P35579	Myosin-9	MYH9	QDTQELLQEENRQKLSLSTKLKQVEDEKNSF	sp|P35579|MYH9_HUMAN Myosin-9 OS=Homo sapiens OX=9606 GN=MYH9 PE=1 SV=4	1	1681	0	NaN	NaN	NaN	NaN	NaN	NaN	NaN	NaN	NaN	NaN	NaN	NaN	NaN	NaN	NaN	NaN	NaN
UID6972	S	2	___1	S(0.001)S(0.001)VLPS(0.377)PS(0.62)GR	0.620431	0.00695602	68.536	58.164	45.661	-0.16214	388080000	637	NaN	0.499991	NaN	NaN	0.620431	0	NaN	NaN	0	P35658-2;P35658;P35658-5	637;648;637	P35658-2	P35658-2	Nuclear pore complex protein Nup214	NUP214	PPSSVPLKSSVLPSPSGRSAQGSSSPVPSMV	sp|P35658-2|NU214_HUMAN Isoform 2 of Nuclear pore complex protein Nup214 OS=Homo sapiens OX=9606 GN=NUP214;sp|P35658|NU214_HUMAN Nuclear pore complex protein Nup214 OS=Homo sapiens OX=9606 GN=NUP214 PE=1 SV=2;sp|P35658-5|NU214_HUMAN Isoform 5 of Nuclear po	1	1689	0	NaN	NaN	NaN	NaN	NaN	NaN	NaN	NaN	NaN	NaN	NaN	NaN	NaN	NaN	NaN	NaN	NaN
UID6980	S	2	___1	SSVLPS(0.808)PS(0.192)AGR	0.807607	0.00192331	75.739	59.602	66.393	-0.12585	49788000	635	NaN	0.497918	NaN	NaN	NaN	0.807607	NaN	0.64804	0.507949	P35658-4;P35658-3	635;646	P35658-4	P35658-4	Nuclear pore complex protein Nup214	NUP214	SAPPSSVPLKSSVLPSPSAGRSAQGSSSPVP	sp|P35658-4|NU214_HUMAN Isoform 4 of Nuclear pore complex protein Nup214 OS=Homo sapiens OX=9606 GN=NUP214;sp|P35658-3|NU214_HUMAN Isoform 3 of Nuclear pore complex protein Nup214 OS=Homo sapiens OX=9606 GN=NUP214	1	1690	0	NaN	NaN	NaN	NaN	NaN	NaN	NaN	NaN	NaN	NaN	NaN	NaN	NaN	NaN	NaN	NaN	NaN
UID7030	S	3	___1	NIPGIT(0.001)LLNVS(0.999)K	0.999475	0.00177995	69.729	37.886	62.525	0.30002	21400000	233	0.999475	0.998372	NaN	NaN	0.999154	NaN	NaN	0	NaN	P36578	233	P36578	P36578	60S ribosomal protein L4	RPL4	IKAFRNIPGITLLNVSKLNILKLAPGGHVGR	sp|P36578|RL4_HUMAN 60S ribosomal protein L4 OS=Homo sapiens OX=9606 GN=RPL4 PE=1 SV=5	1	1704	0	NaN	NaN	NaN	NaN	NaN	NaN	NaN	NaN	NaN	NaN	NaN	NaN	NaN	NaN	NaN	NaN	NaN
UID7036	S	3	___1	LNQQPS(1)QGLGPR	1	0.0144075	53.946	36.715	53.946	0.90509	194550000	68	0	NaN	0	NaN	NaN	1	0	0	0	P36915	68	P36915	P36915	Guanine nucleotide-binding protein-like 1	GNL1	GESVTHHIRRLNQQPSQGLGPRGYDPNRYRL	sp|P36915|GNL1_HUMAN Guanine nucleotide-binding protein-like 1 OS=Homo sapiens OX=9606 GN=GNL1 PE=1 SV=2	1	1710	0	NaN	NaN	NaN	NaN	NaN	NaN	NaN	NaN	NaN	NaN	NaN	NaN	NaN	NaN	NaN	NaN	NaN
UID7067	S	3	___1	S(0.003)S(0.041)S(0.955)PVKR	0.955218	0.0150201	66.504	41.367	66.504	0.11559	115770000	4	NaN	0	0	0.691313	0.955218	0.404065	NaN	NaN	0.86435	P37837	4	P37837	P37837	Transaldolase	TALDO1	____________MSSSPVKRQRMESALDQLK	sp|P37837|TALDO_HUMAN Transaldolase OS=Homo sapiens OX=9606 GN=TALDO1 PE=1 SV=2	1	1721	0	NaN	NaN	NaN	NaN	NaN	NaN	NaN	NaN	NaN	NaN	NaN	NaN	NaN	NaN	NaN	NaN	NaN
UID7077	S	3	___1	S(0.831)DLYS(0.084)S(0.084)GRDR	0.831449	0.00535206	65.395	11.712	65.395	-1.8369	11250000	332	0.331295	0.332943	0	NaN	0.732429	NaN	0	0	0.831449	P38159;P38159-2	332;319	P38159	P38159	RNA-binding motif protein, X chromosome;RNA-binding motif protein, X chromosome, N-terminally processed	RBMX	RDGYGGSRDSYSSSRSDLYSSGRDRVGRQER	sp|P38159|RBMX_HUMAN RNA-binding motif protein, X chromosome OS=Homo sapiens OX=9606 GN=RBMX PE=1 SV=3;sp|P38159-2|RBMX_HUMAN Isoform 2 of RNA-binding motif protein, X chromosome OS=Homo sapiens OX=9606 GN=RBMX	1	1723	0	NaN	NaN	NaN	NaN	NaN	NaN	NaN	NaN	NaN	NaN	NaN	NaN	NaN	NaN	NaN	NaN	NaN
UID7130	S	4	___1	EGS(0.9)GS(0.034)S(0.031)GT(0.034)GEQKEDQKEEK	0.900099	0.00183324	58.457	47.04	58.457	0.95487	36690000	662	NaN	NaN	NaN	NaN	0.900099	NaN	NaN	NaN	NaN	P38646	662	P38646	P38646	Stress-70 protein, mitochondrial	HSPA9	LFEMAYKKMASEREGSGSSGTGEQKEDQKEE	sp|P38646|GRP75_HUMAN Stress-70 protein, mitochondrial OS=Homo sapiens OX=9606 GN=HSPA9 PE=1 SV=2	1	1727	0	NaN	NaN	NaN	NaN	NaN	NaN	NaN	NaN	NaN	NaN	NaN	NaN	NaN	NaN	NaN	NaN	NaN
UID7203	S	4	___1	S(0.518)CLQCRPPS(0.471)PPES(0.005)S(0.005)VPQQQVK	0.518212	0.00378827	55.881	41.72	55.881	-0.28587	18315000	746	NaN	NaN	NaN	NaN	0.518212	NaN	NaN	NaN	NaN	P41002	746	P41002	P41002	Cyclin-F	CCNF	DSDSHTQPCHHQARKSCLQCRPPSPPESSVP	sp|P41002|CCNF_HUMAN Cyclin-F OS=Homo sapiens OX=9606 GN=CCNF PE=1 SV=2	1	1754	0	NaN	NaN	NaN	NaN	NaN	NaN	NaN	NaN	NaN	NaN	NaN	NaN	NaN	NaN	NaN	NaN	NaN
UID7205	S	4	___1	PGMYPDPHS(1)PFAVS(1)PIPGR	0.999899	2.6e-07	106.12	77.943	74.763	-0.25413	1033800000	245	0.967216	0.995275	0	0.978777	0	0.982921	0.968499	0.946741	0.999899	P41162	245	P41162	P41162	ETS translocation variant 3	ETV3	MLPLFARPGMYPDPHSPFAVSPIPGRGGVLN	sp|P41162|ETV3_HUMAN ETS translocation variant 3 OS=Homo sapiens OX=9606 GN=ETV3 PE=1 SV=2	1;2	1755	0	NaN	NaN	NaN	NaN	NaN	NaN	NaN	NaN	NaN	NaN	NaN	NaN	NaN	NaN	NaN	NaN	NaN
UID7210	S	3	___1	NACILQAS(0.005)GS(0.995)PPAK	0.994788	3.05e-05	97.579	80.254	97.579	-0.34473	22879000	361	NaN	NaN	0.986078	NaN	NaN	0.994788	NaN	0.98818	NaN	P41182-2;P41182	361;361	P41182-2	P41182-2	B-cell lymphoma 6 protein	BCL6	ESCSSKNACILQASGSPPAKSPTDPKACNWK	sp|P41182-2|BCL6_HUMAN Isoform 2 of B-cell lymphoma 6 protein OS=Homo sapiens OX=9606 GN=BCL6;sp|P41182|BCL6_HUMAN B-cell lymphoma 6 protein OS=Homo sapiens OX=9606 GN=BCL6 PE=1 SV=1	1	1756	0	NaN	NaN	NaN	NaN	NaN	NaN	NaN	NaN	NaN	NaN	NaN	NaN	NaN	NaN	NaN	NaN	NaN
UID7258	S	3	___1	APLKPYPVS(0.5)PS(0.5)DK	0.5	1.52e-08	128.26	108.35	128.26	-0.092848	1450700000	1049	NaN	NaN	NaN	NaN	0.5	0	NaN	NaN	NaN	P41252	1049	P41252	P41252	Isoleucine--tRNA ligase, cytoplasmic	IARS	FTTIKAPLKPYPVSPSDKVLIQEKTQLKGSE	sp|P41252|SYIC_HUMAN Isoleucine--tRNA ligase, cytoplasmic OS=Homo sapiens OX=9606 GN=IARS1 PE=1 SV=2	1	1768	0	NaN	NaN	NaN	NaN	NaN	NaN	NaN	NaN	NaN	NaN	NaN	NaN	NaN	NaN	NaN	NaN	NaN
UID7311	S	4	___1	WVDPNS(1)PVLLEDPVLCALAK	1	1.49e-18	147.39	128.84	79.762	-0.84407	127260000	113	NaN	NaN	NaN	0	1	NaN	0	1	NaN	P42330;P42330-2	232;113	P42330;P42330-2	P42330-2	Aldo-keto reductase family 1 member C3	AKR1C3	SALGSQRDKRWVDPNSPVLLEDPVLCALAKK	sp|P42330|AK1C3_HUMAN Aldo-keto reductase family 1 member C3 OS=Homo sapiens OX=9606 GN=AKR1C3 PE=1 SV=4;sp|P42330-2|AK1C3_HUMAN Isoform 2 of Aldo-keto reductase family 1 member C3 OS=Homo sapiens OX=9606 GN=AKR1C3	1	1781;1782	0	NaN	NaN	NaN	NaN	NaN	NaN	NaN	NaN	NaN	NaN	NaN	NaN	NaN	NaN	NaN	NaN	NaN
UID7388	S	4	___1	QVDLESNPQNRS(0.099)PES(0.901)RPSVVYPSTK	0.900701	1.25e-109	222.66	200.65	222.66	0.11649	396100000	1320	NaN	0	0	NaN	0	0.900701	NaN	0	0	P42694	1320	P42694	P42694	Probable helicase with zinc finger domain	HELZ	KQVDLESNPQNRSPESRPSVVYPSTKFPRKD	sp|P42694|HELZ_HUMAN Probable helicase with zinc finger domain OS=Homo sapiens OX=9606 GN=HELZ PE=1 SV=2	1	1793	0	NaN	NaN	NaN	NaN	NaN	NaN	NaN	NaN	NaN	NaN	NaN	NaN	NaN	NaN	NaN	NaN	NaN
UID7443	S	3	___1	EQEEKS(1)GEDGEK	1	8.19e-13	130.9	102.49	81.428	-0.36139	167900000	631	0.999971	1	NaN	NaN	NaN	1	NaN	NaN	NaN	P43243;P43243-2	631;343	P43243	P43243	Matrin-3	MATR3	QKTESSTEGKEQEEKSGEDGEKDTKDDQTEQ	sp|P43243|MATR3_HUMAN Matrin-3 OS=Homo sapiens OX=9606 GN=MATR3 PE=1 SV=2;sp|P43243-2|MATR3_HUMAN Isoform 2 of Matrin-3 OS=Homo sapiens OX=9606 GN=MATR3	1	1805	0	NaN	NaN	NaN	NaN	NaN	NaN	NaN	NaN	NaN	NaN	NaN	NaN	NaN	NaN	NaN	NaN	NaN
UID7470	S	4	___1	LSLFS(0.002)FKQS(0.998)PPGTPVSSCQMR	0.997725	5.77e-09	97.542	82.772	96.793	0.028205	56413000	118	NaN	NaN	NaN	NaN	0.997725	0	NaN	0.986816	NaN	P43354-2;P43354	118;181	P43354-2	P43354-2	Nuclear receptor subfamily 4 group A member 2	NR4A2	RKTPVSRLSLFSFKQSPPGTPVSSCQMRFDG	sp|P43354-2|NR4A2_HUMAN Isoform 2 of Nuclear receptor subfamily 4 group A member 2 OS=Homo sapiens OX=9606 GN=NR4A2;sp|P43354|NR4A2_HUMAN Nuclear receptor subfamily 4 group A member 2 OS=Homo sapiens OX=9606 GN=NR4A2 PE=1 SV=1	1	1810	0	NaN	NaN	NaN	NaN	NaN	NaN	NaN	NaN	NaN	NaN	NaN	NaN	NaN	NaN	NaN	NaN	NaN
UID7576	S	3	___1	S(0.001)S(0.004)FS(0.97)S(0.026)DPDESEGIPLKR	0.969528	1.7e-05	109.03	90.43	109.03	-0.38067	139100000	130	0.87077	NaN	0	0.969528	NaN	0.769181	NaN	0	NaN	P46013-2	130	P46013-2	P46013-2	Antigen KI-67	MKI67	IREQEPARRVSRSSFSSDPDESEGIPLKRRR	sp|P46013-2|KI67_HUMAN Isoform Short of Proliferation marker protein Ki-67 OS=Homo sapiens OX=9606 GN=MKI67	1;2	1825	0	NaN	NaN	NaN	NaN	NaN	NaN	NaN	NaN	NaN	NaN	NaN	NaN	NaN	NaN	NaN	NaN	NaN
UID7634	S	3	___1	KVQDGLS(1)DIAEK	1	7.19e-05	94.461	64.48	78.661	0.36197	12513000	924	NaN	NaN	NaN	NaN	NaN	1	NaN	1	NaN	P46100-4;P46100;P46100-5;P46100-3;P46100-6;P46100-2	924;962;807;845;894;758	P46100-4	P46100-4	Transcriptional regulator ATRX	ATRX	KHLKTKTCKKVQDGLSDIAEKFLKKDQSDET	sp|P46100-4|ATRX_HUMAN Isoform 3 of Transcriptional regulator ATRX OS=Homo sapiens OX=9606 GN=ATRX;sp|P46100|ATRX_HUMAN Transcriptional regulator ATRX OS=Homo sapiens OX=9606 GN=ATRX PE=1 SV=5;sp|P46100-5|ATRX_HUMAN Isoform 5 of Transcriptional regulator A	1	1832	0	NaN	NaN	NaN	NaN	NaN	NaN	NaN	NaN	NaN	NaN	NaN	NaN	NaN	NaN	NaN	NaN	NaN
UID7691	S	3	___1	S(1)AVPPGADKK	1	0.00532077	63.727	32.899	49.448	-0.22054	141950000	130	NaN	NaN	NaN	NaN	1	0	1	NaN	1	P46783	130	P46783	P46783	40S ribosomal protein S10	RPS10	ARLTRGEADRDTYRRSAVPPGADKKAEAGAG	sp|P46783|RS10_HUMAN 40S ribosomal protein S10 OS=Homo sapiens OX=9606 GN=RPS10 PE=1 SV=1	1	1849	0	NaN	NaN	NaN	NaN	NaN	NaN	NaN	NaN	NaN	NaN	NaN	NaN	NaN	NaN	NaN	NaN	NaN
UID7695	S	4	___1	ASVSPMDEPVPDS(0.698)ES(0.301)PIEK	0.698162	0.000868087	62.611	42.536	62.611	0.02985	86390000	1387	0	0	NaN	0	0	0.698162	0	NaN	NaN	P46821	1387	P46821	P46821	Microtubule-associated protein 1B;MAP1B heavy chain;MAP1 light chain LC1	MAP1B	NERASVSPMDEPVPDSESPIEKVLSPLRSPP	sp|P46821|MAP1B_HUMAN Microtubule-associated protein 1B OS=Homo sapiens OX=9606 GN=MAP1B PE=1 SV=2	1	1850	0	NaN	NaN	NaN	NaN	NaN	NaN	NaN	NaN	NaN	NaN	NaN	NaN	NaN	NaN	NaN	NaN	NaN
UID7759	S	2	___1	DES(0.95)T(0.034)DS(0.015)GLS(0.001)MSSYSVPR	0.950028	2.1e-63	189.84	168.24	90.348	0.21617	57887000	359	0	NaN	0	NaN	NaN	0.85171	0.499772	0.950028	0.797231	P46937-6;P46937-7;P46937;P46937-9;P46937-5;P46937-3;P46937-2;P46937-8;P46937-4	359;363;397;401;343;347;381;385;219	P46937-6	P46937-6	Transcriptional coactivator YAP1	YAP1	SDPFLNSGTYHSRDESTDSGLSMSSYSVPRT	sp|P46937-6|YAP1_HUMAN Isoform 6 of Transcriptional coactivator YAP1 OS=Homo sapiens OX=9606 GN=YAP1;sp|P46937-7|YAP1_HUMAN Isoform 7 of Transcriptional coactivator YAP1 OS=Homo sapiens OX=9606 GN=YAP1;sp|P46937|YAP1_HUMAN Transcriptional coactivator YAP1	1	1852	0	NaN	NaN	NaN	NaN	NaN	NaN	NaN	NaN	NaN	NaN	NaN	NaN	NaN	NaN	NaN	NaN	NaN
UID7762	S	2	___1	IS(0.985)QS(0.015)APVK	0.984997	0.0063762	67.726	32.312	57.174	-0.0054419	178750000	236	NaN	NaN	NaN	NaN	0	0.984997	0.840174	0.680755	0.976154	P46937-6;P46937-7;P46937;P46937-9;P46937-5;P46937-3;P46937-2;P46937-8;P46937-4	236;236;274;274;236;236;274;274;96	P46937-6	P46937-6	Transcriptional coactivator YAP1	YAP1	QQNMMNSASAMNQRISQSAPVKQPPPLAPQS	sp|P46937-6|YAP1_HUMAN Isoform 6 of Transcriptional coactivator YAP1 OS=Homo sapiens OX=9606 GN=YAP1;sp|P46937-7|YAP1_HUMAN Isoform 7 of Transcriptional coactivator YAP1 OS=Homo sapiens OX=9606 GN=YAP1;sp|P46937|YAP1_HUMAN Transcriptional coactivator YAP1	1	1852	0	NaN	NaN	NaN	NaN	NaN	NaN	NaN	NaN	NaN	NaN	NaN	NaN	NaN	NaN	NaN	NaN	NaN
UID7811	S	3	___1	DSYLSGSLSS(0.002)GS(0.006)LS(0.893)GS(0.097)ES(0.002)PS(0.001)LDPGR	0.892569	2.26e-26	142.99	123.41	119.41	0.21599	98874000	470	0.339444	0.432028	0.622239	0.29248	NaN	0.892569	NaN	NaN	NaN	P47974	470	P47974	P47974	Zinc finger protein 36, C3H1 type-like 2	ZFP36L2	DRDSYLSGSLSSGSLSGSESPSLDPGRRLPI	sp|P47974|TISD_HUMAN mRNA decay activator protein ZFP36L2 OS=Homo sapiens OX=9606 GN=ZFP36L2 PE=1 SV=3	1	1864	0	NaN	NaN	NaN	NaN	NaN	NaN	NaN	NaN	NaN	NaN	NaN	NaN	NaN	NaN	NaN	NaN	NaN
UID7862	S	3	___1	AGS(0.038)S(0.133)GS(0.606)S(0.172)S(0.05)GGGGGGPGGR	0.606485	0.00386456	55.546	50.053	55.546	-0.30473	4478000	1410	NaN	NaN	NaN	0	0.606485	NaN	NaN	0	NaN	P48634;P48634-2;P48634-3	1410;1397;1409	P48634	P48634	Protein PRRC2A	PRRC2A	QNRRPGPGGKAGSSGSSSGGGGGGPGGRTGP	sp|P48634|PRC2A_HUMAN Protein PRRC2A OS=Homo sapiens OX=9606 GN=PRRC2A PE=1 SV=3;sp|P48634-2|PRC2A_HUMAN Isoform 2 of Protein PRRC2A OS=Homo sapiens OX=9606 GN=PRRC2A;sp|P48634-3|PRC2A_HUMAN Isoform 3 of Protein PRRC2A OS=Homo sapiens OX=9606 GN=PRRC2A	1	1883	0	NaN	NaN	NaN	NaN	NaN	NaN	NaN	NaN	NaN	NaN	NaN	NaN	NaN	NaN	NaN	NaN	NaN
UID7898	S	3	___1	S(0.999)PDLS(0.001)NQNSDQANEEWETASESSDFTSER	0.998716	9.4e-76	184.81	175.82	184.81	0.27792	71715000	1306	0.963053	NaN	NaN	NaN	NaN	0.998716	NaN	NaN	NaN	P48634;P48634-2;P48634-3	1306;1293;1305	P48634	P48634	Protein PRRC2A	PRRC2A	TTVTVAPAPRRAAAKSPDLSNQNSDQANEEW	sp|P48634|PRC2A_HUMAN Protein PRRC2A OS=Homo sapiens OX=9606 GN=PRRC2A PE=1 SV=3;sp|P48634-2|PRC2A_HUMAN Isoform 2 of Protein PRRC2A OS=Homo sapiens OX=9606 GN=PRRC2A;sp|P48634-3|PRC2A_HUMAN Isoform 3 of Protein PRRC2A OS=Homo sapiens OX=9606 GN=PRRC2A	1	1883	0	NaN	NaN	NaN	NaN	NaN	NaN	NaN	NaN	NaN	NaN	NaN	NaN	NaN	NaN	NaN	NaN	NaN
UID7909	S	3	___1	FS(1)ELTAEK	0.999633	0.00324658	78.655	53.801	78.655	-0.0057411	210290000	346	NaN	NaN	0.982526	NaN	NaN	0.997932	0.999633	NaN	0.995032	P48643;P48643-2	346;253	P48643	P48643	T-complex protein 1 subunit epsilon	CCT5	ELIAIATGGRIVPRFSELTAEKLGFAGLVQE	sp|P48643|TCPE_HUMAN T-complex protein 1 subunit epsilon OS=Homo sapiens OX=9606 GN=CCT5 PE=1 SV=1;sp|P48643-2|TCPE_HUMAN Isoform 2 of T-complex protein 1 subunit epsilon OS=Homo sapiens OX=9606 GN=CCT5	1	1885	0	NaN	NaN	NaN	NaN	NaN	NaN	NaN	NaN	NaN	NaN	NaN	NaN	NaN	NaN	NaN	NaN	NaN
UID7912	S	3	___1	GT(0.051)KGS(0.949)EDS(1)PPK	0.949259	0.00188443	73.156	49.115	65.172	0.2114	217830000	439	0.949259	NaN	NaN	0.922855	0.616657	0.876203	0	0.578845	0	P48651;P48651-2;P48651-3	439;293;236	P48651	P48651	Phosphatidylserine synthase 1	PTDSS1	YSPEISWHHRKGTKGSEDSPPKHAGNNESHS	sp|P48651|PTSS1_HUMAN Phosphatidylserine synthase 1 OS=Homo sapiens OX=9606 GN=PTDSS1 PE=1 SV=1;sp|P48651-2|PTSS1_HUMAN Isoform 2 of Phosphatidylserine synthase 1 OS=Homo sapiens OX=9606 GN=PTDSS1;sp|P48651-3|PTSS1_HUMAN Isoform 3 of Phosphatidylserine syn	1;2	1886	0	NaN	NaN	NaN	NaN	NaN	NaN	NaN	NaN	NaN	NaN	NaN	NaN	NaN	NaN	NaN	NaN	NaN
UID7987	S	4	___1	IMGFHRPGS(1)GAEEESQTK	1	2.41e-65	194.18	134.67	117.38	-1.3771	407660000	55	NaN	NaN	NaN	0.949994	0.999998	0.999988	NaN	1	NaN	P49069	55	P49069	P49069	Calcium signal-modulating cyclophilin ligand	CAMLG	SEQRINRIMGFHRPGSGAEEESQTKSKQQDS	sp|P49069|CAMLG_HUMAN Calcium signal-modulating cyclophilin ligand OS=Homo sapiens OX=9606 GN=CAMLG PE=1 SV=1	1	1897	0	NaN	NaN	NaN	NaN	NaN	NaN	NaN	NaN	NaN	NaN	NaN	NaN	NaN	NaN	NaN	NaN	NaN
UID7989	S	3	___1	EKPSNCAAS(0.715)T(0.285)EK	0.714693	0.00722224	61.962	46.423	61.962	0.49479	25104000	207	NaN	NaN	NaN	NaN	0.714693	NaN	NaN	NaN	NaN	P49116;P49116-2	207;226	P49116	P49116	Nuclear receptor subfamily 2 group C member 2	NR2C2	KPFDVQREKPSNCAASTEKIYIRKDLRSPLI	sp|P49116|NR2C2_HUMAN Nuclear receptor subfamily 2 group C member 2 OS=Homo sapiens OX=9606 GN=NR2C2 PE=1 SV=1;sp|P49116-2|NR2C2_HUMAN Isoform 2 of Nuclear receptor subfamily 2 group C member 2 OS=Homo sapiens OX=9606 GN=NR2C2	1	1898	0	NaN	NaN	NaN	NaN	NaN	NaN	NaN	NaN	NaN	NaN	NaN	NaN	NaN	NaN	NaN	NaN	NaN
UID8010	S	3	___1	EAEGS(0.029)S(0.971)AEYKK	0.971152	0.000197351	94.09	68.653	94.09	0.051906	210830000	568	0.872557	0	NaN	NaN	0.971152	0.499335	NaN	0	NaN	P49321-4;P49321;P49321-3;P49321-2	568;632;634;293	P49321-4	P49321-4	Nuclear autoantigenic sperm protein	NASP	RMAVLNEQVKEAEGSSAEYKKEIEELKELLP	sp|P49321-4|NASP_HUMAN Isoform 4 of Nuclear autoantigenic sperm protein OS=Homo sapiens OX=9606 GN=NASP;sp|P49321|NASP_HUMAN Nuclear autoantigenic sperm protein OS=Homo sapiens OX=9606 GN=NASP PE=1 SV=2;sp|P49321-3|NASP_HUMAN Isoform 3 of Nuclear autoantig	1	1904	0	NaN	NaN	NaN	NaN	NaN	NaN	NaN	NaN	NaN	NaN	NaN	NaN	NaN	NaN	NaN	NaN	NaN
UID8014	S	4	___1	KPT(0.002)DGAS(0.099)S(0.882)S(0.017)NCVTDISHLVR	0.881925	1.72e-25	156.89	135.89	156.89	-0.17243	467750000	641	0.699573	0.775269	0.881925	0.737024	NaN	0.79765	0.703442	0	0.805097	P49321-4;P49321;P49321-3;P49321-2	641;705;707;366	P49321-4	P49321-4	Nuclear autoantigenic sperm protein	NASP	SVSMIASRKPTDGASSSNCVTDISHLVRKKR	sp|P49321-4|NASP_HUMAN Isoform 4 of Nuclear autoantigenic sperm protein OS=Homo sapiens OX=9606 GN=NASP;sp|P49321|NASP_HUMAN Nuclear autoantigenic sperm protein OS=Homo sapiens OX=9606 GN=NASP PE=1 SV=2;sp|P49321-3|NASP_HUMAN Isoform 3 of Nuclear autoantig	1	1904	0	NaN	NaN	NaN	NaN	NaN	NaN	NaN	NaN	NaN	NaN	NaN	NaN	NaN	NaN	NaN	NaN	NaN
UID8064	S	4	___1	KET(0.223)PS(0.777)APAK	0.777366	0.000326742	103.34	71.012	103.34	0.18608	141020000	1543	NaN	NaN	0	0.731991	0.777366	0.553979	NaN	NaN	NaN	P49454	1543	P49454	P49454	Centromere protein F	CENPF	CSSLQEENLTRKETPSAPAKGVEELESLCEV	sp|P49454|CENPF_HUMAN Centromere protein F OS=Homo sapiens OX=9606 GN=CENPF PE=1 SV=3	1	1913	0	NaN	NaN	NaN	NaN	NaN	NaN	NaN	NaN	NaN	NaN	NaN	NaN	NaN	NaN	NaN	NaN	NaN
UID8088	S	3	___1	ALQEGEGDLS(0.581)IS(0.419)ADRLSEK	0.580595	1.62e-09	126.46	96.567	126.46	0.090147	39681000	388	NaN	NaN	NaN	NaN	0	0.580595	NaN	0	NaN	P49589-3;P49589-2;P49589	388;305;305	P49589-3	P49589-3	Cysteine--tRNA ligase, cytoplasmic	CARS	AVGDQKALQEGEGDLSISADRLSEKRSPNDF	sp|P49589-3|SYCC_HUMAN Isoform 3 of Cysteine--tRNA ligase, cytoplasmic OS=Homo sapiens OX=9606 GN=CARS1;sp|P49589-2|SYCC_HUMAN Isoform 2 of Cysteine--tRNA ligase, cytoplasmic OS=Homo sapiens OX=9606 GN=CARS1;sp|P49589|SYCC_HUMAN Cysteine--tRNA ligase, cyto	1	1916	0	NaN	NaN	NaN	NaN	NaN	NaN	NaN	NaN	NaN	NaN	NaN	NaN	NaN	NaN	NaN	NaN	NaN
UID8093	S	3	___1	MS(0.592)S(0.408)GAPQK	0.59244	0.0156849	54.608	15.46	45.137	-0.11407	118520000	2	0	NaN	NaN	NaN	0.5	0.59244	NaN	0	0	P49593	2	P49593	P49593	Protein phosphatase 1F	PPM1F	______________MSSGAPQKSSPMASGAE	sp|P49593|PPM1F_HUMAN Protein phosphatase 1F OS=Homo sapiens OX=9606 GN=PPM1F PE=1 SV=3	1	1919	0	NaN	NaN	NaN	NaN	NaN	NaN	NaN	NaN	NaN	NaN	NaN	NaN	NaN	NaN	NaN	NaN	NaN
UID8094	S	3	___1	MS(0.5)S(0.5)GAPQK	0.5	0.0156849	54.608	15.46	54.608	0.021507	98612000	3	0	NaN	NaN	NaN	0.5	NaN	NaN	0	0	P49593	3	P49593	P49593	Protein phosphatase 1F	PPM1F	_____________MSSGAPQKSSPMASGAEE	sp|P49593|PPM1F_HUMAN Protein phosphatase 1F OS=Homo sapiens OX=9606 GN=PPM1F PE=1 SV=3	1	1919	0	NaN	NaN	NaN	NaN	NaN	NaN	NaN	NaN	NaN	NaN	NaN	NaN	NaN	NaN	NaN	NaN	NaN
UID8100	S	2	___1	GAPANVS(0.816)S(0.124)S(0.054)DLT(0.005)GR	0.815875	1.37e-09	104.2	75.898	76.009	0.68287	230110000	389	NaN	0.815875	0.814578	0.69217	0	0.738035	0.784637	0.744544	0.728437	P49674	389	P49674	P49674	Casein kinase I isoform epsilon	CSNK1E	RKVSMRLHRGAPANVSSSDLTGRQEVSRIPA	sp|P49674|KC1E_HUMAN Casein kinase I isoform epsilon OS=Homo sapiens OX=9606 GN=CSNK1E PE=1 SV=1	1	1922	0	NaN	NaN	NaN	NaN	NaN	NaN	NaN	NaN	NaN	NaN	NaN	NaN	NaN	NaN	NaN	NaN	NaN
UID8140	S	3	___1	S(1)VEDDEEGHLICQSGDVLSAR	1	1.37e-158	257.01	222.73	257.01	-0.19405	1508300000	140	0.992861	0	0.997504	1	1	1	0.863062	1	0	P49759;P49759-3	140;182	P49759	P49759	Dual specificity protein kinase CLK1	CLK1	HRRSHGKSHRRKRTRSVEDDEEGHLICQSGD	sp|P49759|CLK1_HUMAN Dual specificity protein kinase CLK1 OS=Homo sapiens OX=9606 GN=CLK1 PE=1 SV=2;sp|P49759-3|CLK1_HUMAN Isoform 3 of Dual specificity protein kinase CLK1 OS=Homo sapiens OX=9606 GN=CLK1	1;2	1933	0	NaN	NaN	NaN	NaN	NaN	NaN	NaN	NaN	NaN	NaN	NaN	NaN	NaN	NaN	NaN	NaN	NaN
UID8214	S	4	___1	GDDYFNYNVQQTS(0.003)T(0.003)NPPLPEPGYFT(0.079)KPPIAAHAS(0.914)R	0.914243	5.49e-16	89.904	79.756	89.904	-0.46706	26577000	991	NaN	NaN	NaN	NaN	0.914243	NaN	NaN	NaN	0	P49792	991	P49792	P49792	E3 SUMO-protein ligase RanBP2	RANBP2	PEPGYFTKPPIAAHASRSAESKTIEFGKTNF	sp|P49792|RBP2_HUMAN E3 SUMO-protein ligase RanBP2 OS=Homo sapiens OX=9606 GN=RANBP2 PE=1 SV=2	1	1939	0	NaN	NaN	NaN	NaN	NaN	NaN	NaN	NaN	NaN	NaN	NaN	NaN	NaN	NaN	NaN	NaN	NaN
UID8231	S	2	___1	S(0.01)ALS(0.443)PS(0.809)KS(0.739)PAK	0.808888	0.00285059	69.602	48.044	50.607	-0.31785	2735900000	2278	NaN	0	NaN	NaN	0.808888	0	0.615177	NaN	0	P49792;Q7Z3J3	2278;1303	P49792;Q7Z3J3	P49792	E3 SUMO-protein ligase RanBP2;RanBP2-like and GRIP domain-containing protein 4	RANBP2;RGPD4	STTGFNFSFKSALSPSKSPAKLNQSGTSVGT;STTGSNFSFKSALSPSKSPAKLNQSGTSVGT	sp|P49792|RBP2_HUMAN E3 SUMO-protein ligase RanBP2 OS=Homo sapiens OX=9606 GN=RANBP2 PE=1 SV=2;sp|Q7Z3J3|RGPD4_HUMAN RanBP2-like and GRIP domain-containing protein 4 OS=Homo sapiens OX=9606 GN=RGPD4 PE=2 SV=3	1;2	1939;3941	0	NaN	NaN	NaN	NaN	NaN	NaN	NaN	NaN	NaN	NaN	NaN	NaN	NaN	NaN	NaN	NaN	NaN
UID8252	S	3	___1	S(0.728)S(0.272)MIETGQGAEGGLSLR	0.728083	9.59e-07	118.71	103.51	58.971	-0.030916	145700000	635	0.728083	0.5	NaN	NaN	0.499992	0.5	NaN	0.499995	NaN	P49796-4;P49796-6;P49796;P49796-1	635;812;916;237	P49796-4	P49796-4	Regulator of G-protein signaling 3	RGS3	DTSDDNYGERSEAKRSSMIETGQGAEGGLSL	sp|P49796-4|RGS3_HUMAN Isoform 4 of Regulator of G-protein signaling 3 OS=Homo sapiens OX=9606 GN=RGS3;sp|P49796-6|RGS3_HUMAN Isoform 6 of Regulator of G-protein signaling 3 OS=Homo sapiens OX=9606 GN=RGS3;sp|P49796|RGS3_HUMAN Regulator of G-protein signal	1	1941	0	NaN	NaN	NaN	NaN	NaN	NaN	NaN	NaN	NaN	NaN	NaN	NaN	NaN	NaN	NaN	NaN	NaN
UID8253	S	3	___1	RS(0.189)S(0.811)MIETGQGAEGGLSLR	0.811362	9.59e-07	118.71	103.51	79.236	1.1229	111150000	636	NaN	0.811362	NaN	NaN	0.499992	0.5	NaN	0.499995	NaN	P49796-4;P49796-6;P49796;P49796-1	636;813;917;238	P49796-4	P49796-4	Regulator of G-protein signaling 3	RGS3	TSDDNYGERSEAKRSSMIETGQGAEGGLSLR	sp|P49796-4|RGS3_HUMAN Isoform 4 of Regulator of G-protein signaling 3 OS=Homo sapiens OX=9606 GN=RGS3;sp|P49796-6|RGS3_HUMAN Isoform 6 of Regulator of G-protein signaling 3 OS=Homo sapiens OX=9606 GN=RGS3;sp|P49796|RGS3_HUMAN Regulator of G-protein signal	1	1941	0	NaN	NaN	NaN	NaN	NaN	NaN	NaN	NaN	NaN	NaN	NaN	NaN	NaN	NaN	NaN	NaN	NaN
UID8268	S	4	___1	S(0.718)S(0.144)S(0.115)S(0.024)PELQTLQDILGDPGDKADVGR	0.718086	7.75e-147	239.87	213.91	170	-0.0761	194190000	1362	0.329993	0.341118	0.343486	0.347988	0.718086	0.342776	0.505787	0.489832	0.345722	P49815-4;P49815;P49815-6;P49815-5;P49815-3;P49815-2;P49815-7	1362;1385;1282;1318;1341;1342;1270	P49815-4	P49815-4	Tuberin	TSC2	PSVDLSFQPSQPLSKSSSSPELQTLQDILGD	sp|P49815-4|TSC2_HUMAN Isoform 4 of Tuberin OS=Homo sapiens OX=9606 GN=TSC2;sp|P49815|TSC2_HUMAN Tuberin OS=Homo sapiens OX=9606 GN=TSC2 PE=1 SV=2;sp|P49815-6|TSC2_HUMAN Isoform 6 of Tuberin OS=Homo sapiens OX=9606 GN=TSC2;sp|P49815-5|TSC2_HUMAN Isoform 5	1;2	1943	0	NaN	NaN	NaN	NaN	NaN	NaN	NaN	NaN	NaN	NaN	NaN	NaN	NaN	NaN	NaN	NaN	NaN
UID8313	S	3	___1	IMSQSQVS(1)K	0.999978	0.000714454	87.001	63.252	84.718	-0.3587	70974000	653	0.998985	0.999915	NaN	NaN	0.999802	0.999906	0.999453	NaN	0.999978	P49959-2;P49959;P49959-3	653;681;684	P49959-2	P49959-2	Double-strand break repair protein MRE11A	MRE11A	WSSTSSSKIMSQSQVSKGVDFESSEDDDDDP	sp|P49959-2|MRE11_HUMAN Isoform 2 of Double-strand break repair protein MRE11 OS=Homo sapiens OX=9606 GN=MRE11;sp|P49959|MRE11_HUMAN Double-strand break repair protein MRE11 OS=Homo sapiens OX=9606 GN=MRE11 PE=1 SV=3;sp|P49959-3|MRE11_HUMAN Isoform 3 of Do	1	1953	0	NaN	NaN	NaN	NaN	NaN	NaN	NaN	NaN	NaN	NaN	NaN	NaN	NaN	NaN	NaN	NaN	NaN
UID8371	S	2	___1	VPAQS(0.003)ES(0.997)VR	0.996827	0.010462	67.214	46.38	67.214	-0.075081	135800000	305	NaN	NaN	NaN	NaN	0.983453	NaN	0.996827	0.749647	NaN	P50552	305	P50552	P50552	Vasodilator-stimulated phosphoprotein	VASP	ANQEEPEARVPAQSESVRRPWEKNSTTLPRM	sp|P50552|VASP_HUMAN Vasodilator-stimulated phosphoprotein OS=Homo sapiens OX=9606 GN=VASP PE=1 SV=3	1	1967	0	NaN	NaN	NaN	NaN	NaN	NaN	NaN	NaN	NaN	NaN	NaN	NaN	NaN	NaN	NaN	NaN	NaN
UID8418	S	3	___1	NADDLEVS(0.093)S(0.907)DIIEAVAISSNSFITTGK	0.906908	2.21e-25	124.99	116.02	114.2	-1.1591	78491000	1052	NaN	NaN	0.833281	NaN	0.906908	NaN	NaN	0.498805	0.750706	P50851-2;P50851	1052;1052	P50851-2	P50851-2	Lipopolysaccharide-responsive and beige-like anchor protein	LRBA	TLTNETRNADDLEVSSDIIEAVAISSNSFIT	sp|P50851-2|LRBA_HUMAN Isoform 2 of Lipopolysaccharide-responsive and beige-like anchor protein OS=Homo sapiens OX=9606 GN=LRBA;sp|P50851|LRBA_HUMAN Lipopolysaccharide-responsive and beige-like anchor protein OS=Homo sapiens OX=9606 GN=LRBA PE=1 SV=4	1	1976	0	NaN	NaN	NaN	NaN	NaN	NaN	NaN	NaN	NaN	NaN	NaN	NaN	NaN	NaN	NaN	NaN	NaN
UID8433	S	2	___1	GS(0.94)T(0.06)DNLMDDIER	0.939919	0.000485603	83.877	65.262	83.877	1.495	47953000	380	NaN	NaN	NaN	NaN	0	0.939919	NaN	NaN	NaN	P50990;P50990-2;P50990-3	380;361;307	P50990	P50990	T-complex protein 1 subunit theta	CCT8	HEKEDGAISTIVLRGSTDNLMDDIERAVDDG	sp|P50990|TCPQ_HUMAN T-complex protein 1 subunit theta OS=Homo sapiens OX=9606 GN=CCT8 PE=1 SV=4;sp|P50990-2|TCPQ_HUMAN Isoform 2 of T-complex protein 1 subunit theta OS=Homo sapiens OX=9606 GN=CCT8;sp|P50990-3|TCPQ_HUMAN Isoform 3 of T-complex protein 1 s	1	1979	0	NaN	NaN	NaN	NaN	NaN	NaN	NaN	NaN	NaN	NaN	NaN	NaN	NaN	NaN	NaN	NaN	NaN
UID8445	S	2	___1	TSPLNS(0.02)S(0.102)GS(0.506)S(0.371)QGR	0.506309	0.0125706	62.162	33.957	58.487	-0.0364	5291900	552	NaN	NaN	NaN	NaN	NaN	0.506309	0.482363	NaN	0	P51003	552	P51003	P51003	Poly(A) polymerase alpha	PAPOLA	SPTSATKTSPLNSSGSSQGRNSPAPAVTAAS	sp|P51003|PAPOA_HUMAN Poly(A) polymerase alpha OS=Homo sapiens OX=9606 GN=PAPOLA PE=1 SV=4	1	1982	0	NaN	NaN	NaN	NaN	NaN	NaN	NaN	NaN	NaN	NaN	NaN	NaN	NaN	NaN	NaN	NaN	NaN
UID8540	S	2	___1	S(1)PITIITTK	0.999992	0.000118498	155	115.98	146.71	0.023128	191980000	794	0.999992	NaN	0.998804	NaN	0.99745	0.999978	0.999621	NaN	0.999923	P51610;P51610-2;P51610-4	794;725;794	P51610;P51610-4	P51610	Host cell factor 1;HCF N-terminal chain 1;HCF N-terminal chain 2;HCF N-terminal chain 3;HCF N-terminal chain 4;HCF N-terminal chain 5;HCF N-terminal chain 6;HCF C-terminal chain 1;HCF C-terminal chain 2;HCF C-terminal chain 3;HCF C-terminal chain 4;HCF C-terminal chain 5;HCF C-terminal chain 6	HCFC1	TQAGATGVTSSPGIKSPITIITTKVMTSGTG	sp|P51610|HCFC1_HUMAN Host cell factor 1 OS=Homo sapiens OX=9606 GN=HCFC1 PE=1 SV=2;sp|P51610-2|HCFC1_HUMAN Isoform 2 of Host cell factor 1 OS=Homo sapiens OX=9606 GN=HCFC1;sp|P51610-4|HCFC1_HUMAN Isoform 4 of Host cell factor 1 OS=Homo sapiens OX=9606 GN=	1	2003;2004	0	NaN	NaN	NaN	NaN	NaN	NaN	NaN	NaN	NaN	NaN	NaN	NaN	NaN	NaN	NaN	NaN	NaN
UID8574	S	3	___1	S(0.008)HT(0.01)LLS(0.977)PS(0.005)PK	0.976729	0.00167537	73.435	13.18	62.338	-0.31517	208660000	407	NaN	NaN	0.716407	0.744027	0.760114	0.898118	NaN	0.857715	0.976729	P51787;P51787-2	407;280	P51787	P51787	Potassium voltage-gated channel subfamily KQT member 1	KCNQ1	WKIYIRKAPRSHTLLSPSPKPKKSVVVKKKK	sp|P51787|KCNQ1_HUMAN Potassium voltage-gated channel subfamily KQT member 1 OS=Homo sapiens OX=9606 GN=KCNQ1 PE=1 SV=3;sp|P51787-2|KCNQ1_HUMAN Isoform 2 of Potassium voltage-gated channel subfamily KQT member 1 OS=Homo sapiens OX=9606 GN=KCNQ1	1	2014	0	NaN	NaN	NaN	NaN	NaN	NaN	NaN	NaN	NaN	NaN	NaN	NaN	NaN	NaN	NaN	NaN	NaN
UID8619	S	4	___1	EDS(1)VKPGAHLTVK	1	1.89e-23	163.45	113.46	153.86	0.19847	190970000	116	1	NaN	NaN	NaN	1	0	0.980862	NaN	NaN	P51991;P51991-2	116;94	P51991	P51991	Heterogeneous nuclear ribonucleoprotein A3	HNRNPA3	DGRVVEPKRAVSREDSVKPGAHLTVKKIFVG	sp|P51991|ROA3_HUMAN Heterogeneous nuclear ribonucleoprotein A3 OS=Homo sapiens OX=9606 GN=HNRNPA3 PE=1 SV=2;sp|P51991-2|ROA3_HUMAN Isoform 2 of Heterogeneous nuclear ribonucleoprotein A3 OS=Homo sapiens OX=9606 GN=HNRNPA3	1	2030	0	NaN	NaN	NaN	NaN	NaN	NaN	NaN	NaN	NaN	NaN	NaN	NaN	NaN	NaN	NaN	NaN	NaN
UID8622	S	2	___1	S(0.95)S(0.04)GS(0.009)PYGGGYGSGGGSGGYGSR	0.95043	2.44e-36	136.96	119.26	100.28	4.3539	170990000	355	0.697968	0.69864	0.454242	0	0.860848	0	NaN	0.95043	0.489564	P51991;P51991-2	355;333	P51991	P51991	Heterogeneous nuclear ribonucleoprotein A3	HNRNPA3	QSNYGPMKGGSFGGRSSGSPYGGGYGSGGGS	sp|P51991|ROA3_HUMAN Heterogeneous nuclear ribonucleoprotein A3 OS=Homo sapiens OX=9606 GN=HNRNPA3 PE=1 SV=2;sp|P51991-2|ROA3_HUMAN Isoform 2 of Heterogeneous nuclear ribonucleoprotein A3 OS=Homo sapiens OX=9606 GN=HNRNPA3	1;2	2030	0	NaN	NaN	NaN	NaN	NaN	NaN	NaN	NaN	NaN	NaN	NaN	NaN	NaN	NaN	NaN	NaN	NaN
UID8635	S	2	___1	QGGGGGGGS(1)VPGIER	1	0.000850988	74.505	47.407	65.477	-0.013062	111120000	358	1	NaN	1	NaN	1	1	1	NaN	NaN	P52272-2;P52272	358;397	P52272-2	P52272-2	Heterogeneous nuclear ribonucleoprotein M	HNRNPM	RGEIIAKQGGGGGGGSVPGIERMGPGIDRLG	sp|P52272-2|HNRPM_HUMAN Isoform 2 of Heterogeneous nuclear ribonucleoprotein M OS=Homo sapiens OX=9606 GN=HNRNPM;sp|P52272|HNRPM_HUMAN Heterogeneous nuclear ribonucleoprotein M OS=Homo sapiens OX=9606 GN=HNRNPM PE=1 SV=3	1	2032	0	NaN	NaN	NaN	NaN	NaN	NaN	NaN	NaN	NaN	NaN	NaN	NaN	NaN	NaN	NaN	NaN	NaN
UID8722	S	2	___1	S(0.978)LT(0.022)QSYLR	0.977683	0.00210661	118.23	66.966	118.23	-0.21455	460820000	1712	0	NaN	0	NaN	NaN	0.977683	NaN	NaN	0	P52948-2;P52948-5;P52948;P52948-6	1712;1786;1803;1700	P52948-2	P52948-2	Nuclear pore complex protein Nup98-Nup96;Nuclear pore complex protein Nup98;Nuclear pore complex protein Nup96	NUP98	GRLPMPEDYAMDELRSLTQSYLRELAVGSL_	sp|P52948-2|NUP98_HUMAN Isoform 2 of Nuclear pore complex protein Nup98-Nup96 OS=Homo sapiens OX=9606 GN=NUP98;sp|P52948-5|NUP98_HUMAN Isoform 5 of Nuclear pore complex protein Nup98-Nup96 OS=Homo sapiens OX=9606 GN=NUP98;sp|P52948|NUP98_HUMAN Nuclear pore	1	2058	0	NaN	NaN	NaN	NaN	NaN	NaN	NaN	NaN	NaN	NaN	NaN	NaN	NaN	NaN	NaN	NaN	NaN
UID8731	S	3	___1	S(0.573)GS(0.427)LENVPNVGVNK	0.573094	2.77e-05	98.408	70.24	98.408	0.26513	86100000	235	NaN	0	0.573094	NaN	NaN	0.5	NaN	0.5	NaN	P53004	235	P53004	P53004	Biliverdin reductase A	BLVRA	GPGLKRNRYLSFHFKSGSLENVPNVGVNKNI	sp|P53004|BIEA_HUMAN Biliverdin reductase A OS=Homo sapiens OX=9606 GN=BLVRA PE=1 SV=2	1	2059	0	NaN	NaN	NaN	NaN	NaN	NaN	NaN	NaN	NaN	NaN	NaN	NaN	NaN	NaN	NaN	NaN	NaN
UID8732	S	3	___1	S(0.44)GS(0.56)LENVPNVGVNK	0.559957	1.88e-05	103.13	74.963	103.13	0.18803	128610000	237	NaN	0	NaN	0.542925	NaN	0.5	NaN	0.5	0.559957	P53004	237	P53004	P53004	Biliverdin reductase A	BLVRA	GLKRNRYLSFHFKSGSLENVPNVGVNKNIFL	sp|P53004|BIEA_HUMAN Biliverdin reductase A OS=Homo sapiens OX=9606 GN=BLVRA PE=1 SV=2	1	2059	0	NaN	NaN	NaN	NaN	NaN	NaN	NaN	NaN	NaN	NaN	NaN	NaN	NaN	NaN	NaN	NaN	NaN
UID8784	S	3	___1	GVLNS(1)PVK	1	0.00324658	78.655	59.043	43.308	4.4112	66299000	110	1	1	1	NaN	NaN	1	NaN	NaN	1	P53992-2;P53992	110;862	P53992-2	P53992-2	Protein transport protein Sec24C	SEC24C	LINYMAKFAYRGVLNSPVKAVRDTLITQCAQ	sp|P53992-2|SC24C_HUMAN Isoform 2 of Protein transport protein Sec24C OS=Homo sapiens OX=9606 GN=SEC24C;sp|P53992|SC24C_HUMAN Protein transport protein Sec24C OS=Homo sapiens OX=9606 GN=SEC24C PE=1 SV=3	1	2081	0	NaN	NaN	NaN	NaN	NaN	NaN	NaN	NaN	NaN	NaN	NaN	NaN	NaN	NaN	NaN	NaN	NaN
UID8867	S	3	___1	FLEENS(0.411)S(0.572)DPT(0.017)YTSSLGGK	0.57161	1.07e-23	151.45	124.41	88.755	-0.19411	553160000	770	NaN	0.57161	0.49777	0	0.499994	0.536631	0	0	0	P54760	770	P54760	P54760	Ephrin type-B receptor 4	EPHB4	KVSDFGLSRFLEENSSDPTYTSSLGGKIPIR	sp|P54760|EPHB4_HUMAN Ephrin type-B receptor 4 OS=Homo sapiens OX=9606 GN=EPHB4 PE=1 SV=2	1	2101	0	NaN	NaN	NaN	NaN	NaN	NaN	NaN	NaN	NaN	NaN	NaN	NaN	NaN	NaN	NaN	NaN	NaN
UID8902	S	3	___1	ESIES(1)EIRR	0.99988	0.00959762	59.418	36.885	59.418	-0.092006	106680000	705	NaN	0.999872	0	NaN	0.99988	0	0	0	0.99911	P55072	705	P55072	P55072	Transitional endoplasmic reticulum ATPase	VCP	ICQRACKLAIRESIESEIRRERERQTNPSAM	sp|P55072|TERA_HUMAN Transitional endoplasmic reticulum ATPase OS=Homo sapiens OX=9606 GN=VCP PE=1 SV=4	1	2114	0	NaN	NaN	NaN	NaN	NaN	NaN	NaN	NaN	NaN	NaN	NaN	NaN	NaN	NaN	NaN	NaN	NaN
UID8907	S	3	___1	DFS(0.997)APT(0.003)LEDHFNK	0.997199	4.89e-08	122.93	97.996	122.93	0.0314	16893000	361	NaN	NaN	NaN	NaN	0.997199	NaN	NaN	NaN	NaN	P55081	361	P55081	P55081	Microfibrillar-associated protein 1	MFAP1	AFFMDEDEEVYKRDFSAPTLEDHFNKTILPK	sp|P55081|MFAP1_HUMAN Microfibrillar-associated protein 1 OS=Homo sapiens OX=9606 GN=MFAP1 PE=1 SV=2	1	2115	0	NaN	NaN	NaN	NaN	NaN	NaN	NaN	NaN	NaN	NaN	NaN	NaN	NaN	NaN	NaN	NaN	NaN
UID8920	S	3	___1	S(0.004)S(0.005)S(0.022)YS(0.129)S(0.81)S(0.027)S(0.002)TTVK	0.810198	2.65e-06	115.8	79.111	67.234	0.032499	103410000	388	0.810198	0.760829	NaN	0	0	0.586906	0	NaN	0.605347	P55085	388	P55085	P55085	Proteinase-activated receptor 2;Proteinase-activated receptor 2, alternate cleaved 1;Proteinase-activated receptor 2, alternate cleaved 2	F2RL1	SLTSKKHSRKSSSYSSSSTTVKTSY______	sp|P55085|PAR2_HUMAN Proteinase-activated receptor 2 OS=Homo sapiens OX=9606 GN=F2RL1 PE=1 SV=1	1	2117	0	NaN	NaN	NaN	NaN	NaN	NaN	NaN	NaN	NaN	NaN	NaN	NaN	NaN	NaN	NaN	NaN	NaN
UID8984	S	3	___1	GAGWLS(1)EDEDSPLDALDLVWAK	0.999997	3.76e-16	130.71	115.29	130.71	-0.52281	34913000	1075	0.995703	NaN	NaN	NaN	NaN	0.999997	NaN	NaN	0	P55201-3;P55201;P55201-2;P55201-4	1075;1076;1082;981	P55201-3	P55201-3	Peregrin	BRPF1	HSMVRKSLGRGAGWLSEDEDSPLDALDLVWA	sp|P55201-3|BRPF1_HUMAN Isoform 3 of Peregrin OS=Homo sapiens OX=9606 GN=BRPF1;sp|P55201|BRPF1_HUMAN Peregrin OS=Homo sapiens OX=9606 GN=BRPF1 PE=1 SV=2;sp|P55201-2|BRPF1_HUMAN Isoform 2 of Peregrin OS=Homo sapiens OX=9606 GN=BRPF1;sp|P55201-4|BRPF1_HUMAN	1	2123	0	NaN	NaN	NaN	NaN	NaN	NaN	NaN	NaN	NaN	NaN	NaN	NaN	NaN	NaN	NaN	NaN	NaN
UID8989	S	2	___1	QSPSPSEVSQS(1)PGR	1	1.14e-80	228.11	179.51	228.11	1.2221	244450000	84	NaN	0.939847	1	NaN	0.948784	0.81772	0	0.768758	0.924407	P55201-3;P55201;P55201-2;P55201-4	84;84;84;84	P55201-3	P55201-3	Peregrin	BRPF1	RPANKQSPSPSEVSQSPGREVMSYAQAQRMV	sp|P55201-3|BRPF1_HUMAN Isoform 3 of Peregrin OS=Homo sapiens OX=9606 GN=BRPF1;sp|P55201|BRPF1_HUMAN Peregrin OS=Homo sapiens OX=9606 GN=BRPF1 PE=1 SV=2;sp|P55201-2|BRPF1_HUMAN Isoform 2 of Peregrin OS=Homo sapiens OX=9606 GN=BRPF1;sp|P55201-4|BRPF1_HUMAN	1;2	2123	0	NaN	NaN	NaN	NaN	NaN	NaN	NaN	NaN	NaN	NaN	NaN	NaN	NaN	NaN	NaN	NaN	NaN
UID9007	S	4	___1	TAESQTPTPS(0.001)AT(0.001)S(0.001)FFS(0.537)GKS(0.446)PVT(0.007)T(0.007)LLECMHK	0.537149	1.02e-24	114.58	92.808	114.58	-0.065773	46727000	611	0.467234	0	0.487448	NaN	0.537149	0.167718	0	NaN	0.185679	P55265;P55265-4;P55265-5;P55265-3;P55265-2	611;654;316;611;611	P55265	P55265	Double-stranded RNA-specific adenosine deaminase	ADAR	TAESQTPTPSATSFFSGKSPVTTLLECMHKL	sp|P55265|DSRAD_HUMAN Double-stranded RNA-specific adenosine deaminase OS=Homo sapiens OX=9606 GN=ADAR PE=1 SV=4;sp|P55265-4|DSRAD_HUMAN Isoform 4 of Double-stranded RNA-specific adenosine deaminase OS=Homo sapiens OX=9606 GN=ADAR;sp|P55265-5|DSRAD_HUMAN I	1	2127	0	NaN	NaN	NaN	NaN	NaN	NaN	NaN	NaN	NaN	NaN	NaN	NaN	NaN	NaN	NaN	NaN	NaN
UID9032	S	4	___1	EGRPS(1)GEAFVELESEEEVK	1	1.27e-69	195.24	155.31	195.24	-0.18263	124170000	54	NaN	NaN	NaN	NaN	1	NaN	NaN	1	NaN	P55795	54	P55795	P55795	Heterogeneous nuclear ribonucleoprotein H2	HNRNPH2	GTSGIRFIYTREGRPSGEAFVELESEEEVKL	sp|P55795|HNRH2_HUMAN Heterogeneous nuclear ribonucleoprotein H2 OS=Homo sapiens OX=9606 GN=HNRNPH2 PE=1 SV=1	1	2137	0	NaN	NaN	NaN	NaN	NaN	NaN	NaN	NaN	NaN	NaN	NaN	NaN	NaN	NaN	NaN	NaN	NaN
UID9038	S	3	___1	S(1)EEKPKEGVK	1	0.00505182	49.5	23.376	49.5	-0.12499	31021000	2	NaN	NaN	NaN	NaN	1	NaN	NaN	NaN	NaN	P55854-2;P55854	2;2	P55854-2	P55854-2	Small ubiquitin-related modifier 3	SUMO3	______________MSEEKPKEGVKTENDHI	sp|P55854-2|SUMO3_HUMAN Isoform 2 of Small ubiquitin-related modifier 3 OS=Homo sapiens OX=9606 GN=SUMO3;sp|P55854|SUMO3_HUMAN Small ubiquitin-related modifier 3 OS=Homo sapiens OX=9606 GN=SUMO3 PE=1 SV=2	1	2139	0	NaN	NaN	NaN	NaN	NaN	NaN	NaN	NaN	NaN	NaN	NaN	NaN	NaN	NaN	NaN	NaN	NaN
UID9095	S	3	___1	S(1)RLS(1)AIEIDIPVVSHTT	1	0	341.19	326.73	141.7	0.29906	167440000	228	0	0	NaN	NaN	0.991893	0.939519	0	1	0	P56749	228	P56749	P56749	Claudin-12	CLDN12	HPPSMHTYSQPYSARSRLSAIEIDIPVVSHT	sp|P56749|CLD12_HUMAN Claudin-12 OS=Homo sapiens OX=9606 GN=CLDN12 PE=1 SV=1	1;2	2154	0	NaN	NaN	NaN	NaN	NaN	NaN	NaN	NaN	NaN	NaN	NaN	NaN	NaN	NaN	NaN	NaN	NaN
UID9195	S	4	___1	PGPTPSGTNVGS(0.352)S(0.833)GRS(0.707)PS(0.107)K	0.832954	1.71e-43	172.42	125.75	90.694	0.17376	295540000	14	0	0.832954	NaN	0.384341	0.662509	0.812558	0	NaN	0	P60468	14	P60468	P60468	Protein transport protein Sec61 subunit beta	SEC61B	__MPGPTPSGTNVGSSGRSPSKAVAARAAGS	sp|P60468|SC61B_HUMAN Protein transport protein Sec61 subunit beta OS=Homo sapiens OX=9606 GN=SEC61B PE=1 SV=2	1;2	2183	0	NaN	NaN	NaN	NaN	NaN	NaN	NaN	NaN	NaN	NaN	NaN	NaN	NaN	NaN	NaN	NaN	NaN
UID9226	S	3	___1	EPNSENVDIS(0.772)S(0.161)GGGVT(0.067)GWK	0.771576	9.46e-175	261.6	225.31	55.881	-0.09328	501780000	187	0.493236	0	0	NaN	0.499352	0.629469	0.771576	0	NaN	P61026	187	P61026	P61026	Ras-related protein Rab-10	RAB10	RKTPVKEPNSENVDISSGGGVTGWKSKCC__	sp|P61026|RAB10_HUMAN Ras-related protein Rab-10 OS=Homo sapiens OX=9606 GN=RAB10 PE=1 SV=1	1	2199	0	NaN	NaN	NaN	NaN	NaN	NaN	NaN	NaN	NaN	NaN	NaN	NaN	NaN	NaN	NaN	NaN	NaN
UID9231	S	2	___1	ATAPY(0.019)NY(0.321)S(0.636)Y(0.023)IFK	0.636305	4.09e-05	86.275	67.66	86.275	0.54573	15257000	9	0.553693	0	NaN	NaN	NaN	0.636305	NaN	NaN	NaN	P61106	9	P61106	P61106	Ras-related protein Rab-14	RAB14	_______MATAPYNYSYIFKYIIIGDMGVGK	sp|P61106|RAB14_HUMAN Ras-related protein Rab-14 OS=Homo sapiens OX=9606 GN=RAB14 PE=1 SV=4	1	2203	0	NaN	NaN	NaN	NaN	NaN	NaN	NaN	NaN	NaN	NaN	NaN	NaN	NaN	NaN	NaN	NaN	NaN
UID9235	S	3	___1	NIS(0.996)FT(0.004)VWDVGGQDK	0.995763	6.55e-06	110.74	86.392	73.432	0.18593	21759000	62	NaN	NaN	NaN	0	0.995763	0.889706	NaN	NaN	NaN	P61204;P84077	62;62	P61204	P61204	ADP-ribosylation factor 3;ADP-ribosylation factor 1	ARF3;ARF1	PTIGFNVETVEYKNISFTVWDVGGQDKIRPL	sp|P61204|ARF3_HUMAN ADP-ribosylation factor 3 OS=Homo sapiens OX=9606 GN=ARF3 PE=1 SV=2;sp|P84077|ARF1_HUMAN ADP-ribosylation factor 1 OS=Homo sapiens OX=9606 GN=ARF1 PE=1 SV=2	1	2207	0	NaN	NaN	NaN	NaN	NaN	NaN	NaN	NaN	NaN	NaN	NaN	NaN	NaN	NaN	NaN	NaN	NaN
UID9243	S	3	___1	LMELHGEGS(0.006)S(0.132)S(0.862)GK	0.861934	2.35e-12	136.1	96.18	136.1	-0.68974	351640000	238	0	0	0	0.835287	0.861934	0	0	0	0	P61247	238	P61247	P61247	40S ribosomal protein S3a	RPS3A	FELGKLMELHGEGSSSGKATGDETGAKVERA	sp|P61247|RS3A_HUMAN 40S ribosomal protein S3a OS=Homo sapiens OX=9606 GN=RPS3A PE=1 SV=2	1	2211	0	NaN	NaN	NaN	NaN	NaN	NaN	NaN	NaN	NaN	NaN	NaN	NaN	NaN	NaN	NaN	NaN	NaN
UID9295	S	3	___1	VNRLS(1)VLGAITSVQQR	1	0.000438118	83.064	62.675	76.889	-0.051691	90342000	37	NaN	0.99999	0.999998	NaN	NaN	1	0	NaN	0.999987	P62495-2;P62495	37;70	P62495-2	P62495-2	Eukaryotic peptide chain release factor subunit 1	ETF1	EFGTASNIKSRVNRLSVLGAITSVQQRLKLY	sp|P62495-2|ERF1_HUMAN Isoform 2 of Eukaryotic peptide chain release factor subunit 1 OS=Homo sapiens OX=9606 GN=ETF1;sp|P62495|ERF1_HUMAN Eukaryotic peptide chain release factor subunit 1 OS=Homo sapiens OX=9606 GN=ETF1 PE=1 SV=3	1	2257	0	NaN	NaN	NaN	NaN	NaN	NaN	NaN	NaN	NaN	NaN	NaN	NaN	NaN	NaN	NaN	NaN	NaN
UID9311	S	3	___1	EFADS(1)LGIPFLETSAK	0.999999	6.47e-05	98.165	79.089	85.808	0.04662	47258000	142	0.999985	0.999998	0.999999	0.999999	0.999999	NaN	0.99971	0.999999	0.999996	P62820;P62820-2;P62820-3;Q9H0U4;Q92928	145;81;69;142;142	P62820;Q9H0U4	Q9H0U4	Ras-related protein Rab-1A;Ras-related protein Rab-1B;Putative Ras-related protein Rab-1C	RAB1A;RAB1B;RAB1C	TKKVVDNTTAKEFADSLGIPFLETSAKNATN;TKKVVDYTTAKEFADSLGIPFLETSAKNATN	sp|P62820|RAB1A_HUMAN Ras-related protein Rab-1A OS=Homo sapiens OX=9606 GN=RAB1A PE=1 SV=3;sp|P62820-2|RAB1A_HUMAN Isoform 2 of Ras-related protein Rab-1A OS=Homo sapiens OX=9606 GN=RAB1A;sp|P62820-3|RAB1A_HUMAN Isoform 3 of Ras-related protein Rab-1A OS=	1	2266;5822	0	NaN	NaN	NaN	NaN	NaN	NaN	NaN	NaN	NaN	NaN	NaN	NaN	NaN	NaN	NaN	NaN	NaN
UID9351	S	2	___1	VVS(0.052)S(0.948)IEQK	0.947935	0.00119385	125.7	89.173	125.7	0.012876	286990000	64	0.678916	0.845182	0.638126	0.897384	NaN	0.797234	0.827261	0.947935	0.5	P63104	64	P63104	P63104	14-3-3 protein zeta/delta	YWHAZ	KNVVGARRSSWRVVSSIEQKTEGAEKKQQMA	sp|P63104|1433Z_HUMAN 14-3-3 protein zeta/delta OS=Homo sapiens OX=9606 GN=YWHAZ PE=1 SV=1	1	2286	0	NaN	NaN	NaN	NaN	NaN	NaN	NaN	NaN	NaN	NaN	NaN	NaN	NaN	NaN	NaN	NaN	NaN
UID9364	S	3	___1	AADPPAENS(0.5)S(0.5)APEAEQGGAE	0.5	0.000219381	67.864	55.998	67.864	-0.76894	61091000	313	NaN	NaN	NaN	NaN	NaN	0.5	NaN	NaN	0	P67809	313	P67809	P67809	Nuclease-sensitive element-binding protein 1	YBX1	QDGKETKAADPPAENSSAPEAEQGGAE____	sp|P67809|YBOX1_HUMAN Y-box-binding protein 1 OS=Homo sapiens OX=9606 GN=YBX1 PE=1 SV=3	1	2295	0	NaN	NaN	NaN	NaN	NaN	NaN	NaN	NaN	NaN	NaN	NaN	NaN	NaN	NaN	NaN	NaN	NaN
UID9365	S	3	___1	AADPPAENS(0.5)S(0.5)APEAEQGGAE	0.5	0.000219381	67.864	55.998	67.864	-0.76894	61091000	314	NaN	NaN	NaN	NaN	NaN	0.5	NaN	NaN	0	P67809	314	P67809	P67809	Nuclease-sensitive element-binding protein 1	YBX1	DGKETKAADPPAENSSAPEAEQGGAE_____	sp|P67809|YBOX1_HUMAN Y-box-binding protein 1 OS=Homo sapiens OX=9606 GN=YBX1 PE=1 SV=3	1	2295	0	NaN	NaN	NaN	NaN	NaN	NaN	NaN	NaN	NaN	NaN	NaN	NaN	NaN	NaN	NaN	NaN	NaN
UID9403	S	3	___1	HNDIVDS(1)DS(1)DAEDR	1	1.04e-14	117.4	101.15	45.885	0.033053	1091500000	146	0.963442	NaN	1	1	1	1	1	1	1	P78316-2;P78316	146;146	P78316-2	P78316-2	Nucleolar protein 14	NOP14	GQSLADIEKHNDIVDSDSDAEDRGTLSAELT	sp|P78316-2|NOP14_HUMAN Isoform 2 of Nucleolar protein 14 OS=Homo sapiens OX=9606 GN=NOP14;sp|P78316|NOP14_HUMAN Nucleolar protein 14 OS=Homo sapiens OX=9606 GN=NOP14 PE=1 SV=3	1;2	2310	0	NaN	NaN	NaN	NaN	NaN	NaN	NaN	NaN	NaN	NaN	NaN	NaN	NaN	NaN	NaN	NaN	NaN
UID9414	S	4	___1	EKLQS(0.809)FDS(0.191)PERK	0.809489	6.87e-05	99.055	68.372	99.055	0.15436	106900000	1022	NaN	NaN	NaN	NaN	NaN	0.809489	NaN	NaN	NaN	P78332;P78332-2	1022;500	P78332	P78332	RNA-binding protein 6	RBM6	GKFKGRGNDRREKLQSFDSPERKRIKYSRET	sp|P78332|RBM6_HUMAN RNA-binding protein 6 OS=Homo sapiens OX=9606 GN=RBM6 PE=1 SV=5;sp|P78332-2|RBM6_HUMAN Isoform 2 of RNA-binding protein 6 OS=Homo sapiens OX=9606 GN=RBM6	1	2314	0	NaN	NaN	NaN	NaN	NaN	NaN	NaN	NaN	NaN	NaN	NaN	NaN	NaN	NaN	NaN	NaN	NaN
UID9435	S	2	___1	S(0.365)PS(0.635)WYGIPR	0.634936	0.00423693	81.335	43.315	81.335	-0.051681	72754000	476	NaN	NaN	0	NaN	NaN	0.634936	NaN	NaN	NaN	P78347-2;P78347-4;P78347-3;P78347	476;496;497;517	P78347-2	P78347-2	General transcription factor II-I	GTF2I	LYVEGLPENIPFRSPSWYGIPRLEKIIQVGN	sp|P78347-2|GTF2I_HUMAN Isoform 2 of General transcription factor II-I OS=Homo sapiens OX=9606 GN=GTF2I;sp|P78347-4|GTF2I_HUMAN Isoform 4 of General transcription factor II-I OS=Homo sapiens OX=9606 GN=GTF2I;sp|P78347-3|GTF2I_HUMAN Isoform 3 of General tra	1	2318	0	NaN	NaN	NaN	NaN	NaN	NaN	NaN	NaN	NaN	NaN	NaN	NaN	NaN	NaN	NaN	NaN	NaN
UID9468	S	3	___1	LT(0.5)S(0.5)FIGAIAIGDLVK	0.5	0.00146855	76.586	54.713	62.203	0.43357	9980200	28	0	NaN	NaN	NaN	NaN	0.5	NaN	0.5	NaN	P78371	28	P78371	P78371	T-complex protein 1 subunit beta	CCT2	KAGADEERAETARLTSFIGAIAIGDLVKSTL	sp|P78371|TCPB_HUMAN T-complex protein 1 subunit beta OS=Homo sapiens OX=9606 GN=CCT2 PE=1 SV=4	1	2324	0	NaN	NaN	NaN	NaN	NaN	NaN	NaN	NaN	NaN	NaN	NaN	NaN	NaN	NaN	NaN	NaN	NaN
UID9496	S	3	___1	KEEENAS(0.044)VIDS(0.956)AELQAYPALVVEK	0.956185	3.19e-127	228.3	200.15	228.3	0.53367	14083000	3436	0	NaN	0	0	0.956185	NaN	NaN	NaN	0	P78527;P78527-2	3436;3436	P78527	P78527	DNA-dependent protein kinase catalytic subunit	PRKDC	DQQLRKEEENASVIDSAELQAYPALVVEKML	sp|P78527|PRKDC_HUMAN DNA-dependent protein kinase catalytic subunit OS=Homo sapiens OX=9606 GN=PRKDC PE=1 SV=3;sp|P78527-2|PRKDC_HUMAN Isoform 2 of DNA-dependent protein kinase catalytic subunit OS=Homo sapiens OX=9606 GN=PRKDC	1	2333	0	NaN	NaN	NaN	NaN	NaN	NaN	NaN	NaN	NaN	NaN	NaN	NaN	NaN	NaN	NaN	NaN	NaN
UID9589	S	3	___1	IDSFSVQS(0.015)LDS(0.985)R	0.985287	1.67e-05	106.82	87.426	106.82	-0.35688	14236000	336	0	0	0.944835	NaN	NaN	0.985287	NaN	NaN	NaN	P82094;P82094-2	336;336	P82094	P82094	TATA element modulatory factor	TMF1	DAFERIDSFSVQSLDSRSVSEINSDDELSGK	sp|P82094|TMF1_HUMAN TATA element modulatory factor OS=Homo sapiens OX=9606 GN=TMF1 PE=1 SV=2;sp|P82094-2|TMF1_HUMAN Isoform 2 of TATA element modulatory factor OS=Homo sapiens OX=9606 GN=TMF1	1	2349	0	NaN	NaN	NaN	NaN	NaN	NaN	NaN	NaN	NaN	NaN	NaN	NaN	NaN	NaN	NaN	NaN	NaN
UID9665	S	3	___1	S(0.843)S(0.157)PNPFVGSPPK	0.842678	3.25e-05	103.16	80.243	96.773	0.12458	93908000	393	NaN	0.630789	0	0	0.842678	NaN	0	NaN	0	P98082;P98082-3	393;372	P98082	P98082	Disabled homolog 2	DAB2	QNGVSEREQNGFSVKSSPNPFVGSPPKGLSI	sp|P98082|DAB2_HUMAN Disabled homolog 2 OS=Homo sapiens OX=9606 GN=DAB2 PE=1 SV=3;sp|P98082-3|DAB2_HUMAN Isoform 3 of Disabled homolog 2 OS=Homo sapiens OX=9606 GN=DAB2	1	2372	0	NaN	NaN	NaN	NaN	NaN	NaN	NaN	NaN	NaN	NaN	NaN	NaN	NaN	NaN	NaN	NaN	NaN
UID9680	S	4	___1	GPGAPAS(0.398)PS(0.596)AS(0.006)HPQGLDTTPKPH	0.596271	7.49e-18	138.78	119.74	138.78	0.14123	95528000	932	NaN	NaN	NaN	NaN	0.596271	NaN	NaN	NaN	NaN	P98171;P98171-2	932;972	P98171	P98171	Rho GTPase-activating protein 4	ARHGAP4	RNKGFSRGPGAPASPSASHPQGLDTTPKPH_	sp|P98171|RHG04_HUMAN Rho GTPase-activating protein 4 OS=Homo sapiens OX=9606 GN=ARHGAP4 PE=1 SV=2;sp|P98171-2|RHG04_HUMAN Isoform 2 of Rho GTPase-activating protein 4 OS=Homo sapiens OX=9606 GN=ARHGAP4	1	2377	0	NaN	NaN	NaN	NaN	NaN	NaN	NaN	NaN	NaN	NaN	NaN	NaN	NaN	NaN	NaN	NaN	NaN
UID9683	S	3	___1	QPRPS(0.167)S(0.833)QYNQR	0.832749	0.000280744	93.106	68.607	93.106	-0.49089	38267000	498	NaN	0.499663	NaN	NaN	NaN	0.832749	NaN	NaN	0.762444	P98171;P98171-2	498;538	P98171	P98171	Rho GTPase-activating protein 4	ARHGAP4	YTQRKFQKSRQPRPSSQYNQRLFGGDMEKFI	sp|P98171|RHG04_HUMAN Rho GTPase-activating protein 4 OS=Homo sapiens OX=9606 GN=ARHGAP4 PE=1 SV=2;sp|P98171-2|RHG04_HUMAN Isoform 2 of Rho GTPase-activating protein 4 OS=Homo sapiens OX=9606 GN=ARHGAP4	1	2377	0	NaN	NaN	NaN	NaN	NaN	NaN	NaN	NaN	NaN	NaN	NaN	NaN	NaN	NaN	NaN	NaN	NaN
UID9697	S	3	___1	LAS(1)DDRPS(1)PPR	1	0.000670597	84.365	55.732	42.338	0.097503	144850000	783	1	0	NaN	0.54962	0.955651	NaN	NaN	1	0	P98175-4;P98175-3;P98175-5;P98175-2;P98175	640;641;783;717;718	P98175-4;P98175-5	P98175-5	RNA-binding protein 10	RBM10	LAERQHTSMDLPKLASDDRPSPPRGLVAAYS	sp|P98175-4|RBM10_HUMAN Isoform 4 of RNA-binding protein 10 OS=Homo sapiens OX=9606 GN=RBM10;sp|P98175-3|RBM10_HUMAN Isoform 3 of RNA-binding protein 10 OS=Homo sapiens OX=9606 GN=RBM10;sp|P98175-5|RBM10_HUMAN Isoform 5 of RNA-binding protein 10 OS=Homo sa	1;2	2380;2381	0	NaN	NaN	NaN	NaN	NaN	NaN	NaN	NaN	NaN	NaN	NaN	NaN	NaN	NaN	NaN	NaN	NaN
UID9732	S	4	___1	GPLS(0.543)S(0.457)APEIVHEDLK	0.543271	0.000737023	73.91	58.708	73.91	0.37722	12383000	64	0	NaN	NaN	NaN	0	0.543271	NaN	NaN	0	Q00536;Q00536-3;Q00536-2	64;70;138	Q00536	Q00536	Cyclin-dependent kinase 16	CDK16	TRAAPGELRSARGPLSSAPEIVHEDLKMGSD	sp|Q00536|CDK16_HUMAN Cyclin-dependent kinase 16 OS=Homo sapiens OX=9606 GN=CDK16 PE=1 SV=1;sp|Q00536-3|CDK16_HUMAN Isoform 3 of Cyclin-dependent kinase 16 OS=Homo sapiens OX=9606 GN=CDK16;sp|Q00536-2|CDK16_HUMAN Isoform 2 of Cyclin-dependent kinase 16 OS=	1	2394	0	NaN	NaN	NaN	NaN	NaN	NaN	NaN	NaN	NaN	NaN	NaN	NaN	NaN	NaN	NaN	NaN	NaN
UID9780	S	3	___1	DKLPS(0.96)T(0.04)AEVK	0.959735	5.21e-57	179.74	164.96	88.561	-0.0066643	761750000	858	NaN	0	NaN	0	0.856512	0.796385	NaN	0.959735	0	Q00653	858	Q00653	Q00653	Nuclear factor NF-kappa-B p100 subunit;Nuclear factor NF-kappa-B p52 subunit	NFKB2	GVRLLRGPETRDKLPSTAEVKEDSAYGSQSV	sp|Q00653|NFKB2_HUMAN Nuclear factor NF-kappa-B p100 subunit OS=Homo sapiens OX=9606 GN=NFKB2 PE=1 SV=4	1	2400	0	NaN	NaN	NaN	NaN	NaN	NaN	NaN	NaN	NaN	NaN	NaN	NaN	NaN	NaN	NaN	NaN	NaN
UID9794	S	3	___1	S(0.413)S(0.584)GPT(0.003)SLFAVTVAPPGAR	0.584067	9.11e-44	180.08	161.25	167.97	-0.033929	78498000	188	0.319026	0.486775	0.486739	0.48932	0.584067	0.496362	NaN	0.474608	0.453368	Q00839-2;Q00839	188;188	Q00839-2	Q00839-2	Heterogeneous nuclear ribonucleoprotein U	HNRNPU	PQQQRGAAKEAAGKSSGPTSLFAVTVAPPGA	sp|Q00839-2|HNRPU_HUMAN Isoform 2 of Heterogeneous nuclear ribonucleoprotein U OS=Homo sapiens OX=9606 GN=HNRNPU;sp|Q00839|HNRPU_HUMAN Heterogeneous nuclear ribonucleoprotein U OS=Homo sapiens OX=9606 GN=HNRNPU PE=1 SV=6	1	2403	0	NaN	NaN	NaN	NaN	NaN	NaN	NaN	NaN	NaN	NaN	NaN	NaN	NaN	NaN	NaN	NaN	NaN
UID9805	S	3	___1	EIGQS(1)VDEVEK	1	0.000133373	97.084	51.968	64.675	-2.0702	192520000	2048	1	NaN	NaN	NaN	NaN	1	NaN	1	1	Q01082;Q01082-2;Q01082-3	2048;2048;2035	Q01082;Q01082-3	Q01082	Spectrin beta chain, non-erythrocytic 1	SPTBN1	LLGQEPYLSSREIGQSVDEVEKLIKRHEAFE	sp|Q01082|SPTB2_HUMAN Spectrin beta chain, non-erythrocytic 1 OS=Homo sapiens OX=9606 GN=SPTBN1 PE=1 SV=2;sp|Q01082-2|SPTB2_HUMAN Isoform Short of Spectrin beta chain, non-erythrocytic 1 OS=Homo sapiens OX=9606 GN=SPTBN1;sp|Q01082-3|SPTB2_HUMAN Isoform 2 o	1	2405;2406	0	NaN	NaN	NaN	NaN	NaN	NaN	NaN	NaN	NaN	NaN	NaN	NaN	NaN	NaN	NaN	NaN	NaN
UID9828	S	4	___1	ATDSATIVS(0.003)PPPS(0.087)S(0.502)PPS(0.096)S(0.096)LT(0.096)T(0.096)DPS(0.019)QS(0.004)LLSLEQEPLLSR	0.502319	1.05e-32	112.03	96.98	92.846	0.21599	30438000	337	0.335029	0.301733	0.314166	0.342525	0.502319	0.119917	0.164553	0.324825	NaN	Q01094	337	Q01094	Q01094	Transcription factor E2F1	E2F1	NRATDSATIVSPPPSSPPSSLTTDPSQSLLS	sp|Q01094|E2F1_HUMAN Transcription factor E2F1 OS=Homo sapiens OX=9606 GN=E2F1 PE=1 SV=1	1	2408	0	NaN	NaN	NaN	NaN	NaN	NaN	NaN	NaN	NaN	NaN	NaN	NaN	NaN	NaN	NaN	NaN	NaN
UID9908	S	4	___1	VQRPKEES(1)S(1)EDENEVSNILR	0.999995	0	373.36	330.58	97.057	0.1356	1363400000	958	NaN	0.999815	NaN	NaN	0.998551	0.998556	0.999995	0.999972	0.999639	Q01804-5;Q01804-3;Q01804	958;959;1024	Q01804-5	Q01804-5	OTU domain-containing protein 4	OTUD4	ANSVDSRVQRPKEESSEDENEVSNILRSGRS	sp|Q01804-5|OTUD4_HUMAN Isoform 2 of OTU domain-containing protein 4 OS=Homo sapiens OX=9606 GN=OTUD4;sp|Q01804-3|OTUD4_HUMAN Isoform 3 of OTU domain-containing protein 4 OS=Homo sapiens OX=9606 GN=OTUD4;sp|Q01804|OTUD4_HUMAN OTU domain-containing protein	1;2	2430	0	NaN	NaN	NaN	NaN	NaN	NaN	NaN	NaN	NaN	NaN	NaN	NaN	NaN	NaN	NaN	NaN	NaN
UID9929	S	5	___1	LTADPGGS(0.011)S(0.011)ET(0.108)S(0.517)S(0.353)QVLENHTKPK	0.517139	1.3e-119	226.18	203.87	226.18	-0.072112	99873000	350	NaN	NaN	0.392273	0	0.517139	0	0	0	NaN	Q01831;Q01831-2	350;313	Q01831	Q01831	DNA repair protein complementing XP-C cells	XPC	SKERLTADPGGSSETSSQVLENHTKPKTSKG	sp|Q01831|XPC_HUMAN DNA repair protein complementing XP-C cells OS=Homo sapiens OX=9606 GN=XPC PE=1 SV=4;sp|Q01831-2|XPC_HUMAN Isoform 2 of DNA repair protein complementing XP-C cells OS=Homo sapiens OX=9606 GN=XPC	1	2433	0	NaN	NaN	NaN	NaN	NaN	NaN	NaN	NaN	NaN	NaN	NaN	NaN	NaN	NaN	NaN	NaN	NaN
UID9988	S	3	___1	S(0.995)VS(0.567)PS(0.438)PVPLLFQPDQNAPPIR	0.99511	3.14e-46	176.34	141.72	152.96	-0.013021	504880000	682	0.958676	0.954502	0.986699	0.981039	0.95241	0.989074	0.986866	0.99511	0.994235	Q02241-2;Q02241-3	682;499	Q02241-2	Q02241-2	Kinesin-like protein KIF23	KIF23	ERPSRERDREKVTQRSVSPSPVPLLFQPDQN	sp|Q02241-2|KIF23_HUMAN Isoform 2 of Kinesin-like protein KIF23 OS=Homo sapiens OX=9606 GN=KIF23;sp|Q02241-3|KIF23_HUMAN Isoform 3 of Kinesin-like protein KIF23 OS=Homo sapiens OX=9606 GN=KIF23	1;2	2447	0	NaN	NaN	NaN	NaN	NaN	NaN	NaN	NaN	NaN	NaN	NaN	NaN	NaN	NaN	NaN	NaN	NaN
UID10006	S	4	___1	MGPPS(1)PGDDEEEAAAAAGAPAAAGATGDLASAQLGGAPNR	1	4.35e-12	83.821	75.058	82.994	0.35063	49668000	5	NaN	1	NaN	NaN	NaN	1	0	NaN	NaN	Q02447-5	5	Q02447-5	Q02447-5	Transcription factor Sp3	SP3	___________MGPPSPGDDEEEAAAAAGAP	sp|Q02447-5|SP3_HUMAN Isoform 5 of Transcription factor Sp3 OS=Homo sapiens OX=9606 GN=SP3	1	2452	0	NaN	NaN	NaN	NaN	NaN	NaN	NaN	NaN	NaN	NaN	NaN	NaN	NaN	NaN	NaN	NaN	NaN
UID10052	S	4	___1	REQS(0.192)HAEIS(0.808)PPAESGQAVEECKEEGEEK	0.808356	3.78e-154	243.16	220.35	243.16	0.016421	75227000	253	NaN	NaN	NaN	NaN	0.808356	NaN	NaN	NaN	NaN	Q02952;Q02952-3;Q02952-2	253;148;155	Q02952	Q02952	A-kinase anchor protein 12	AKAP12	KPEETLKREQSHAEISPPAESGQAVEECKEE	sp|Q02952|AKA12_HUMAN A-kinase anchor protein 12 OS=Homo sapiens OX=9606 GN=AKAP12 PE=1 SV=4;sp|Q02952-3|AKA12_HUMAN Isoform 3 of A-kinase anchor protein 12 OS=Homo sapiens OX=9606 GN=AKAP12;sp|Q02952-2|AKA12_HUMAN Isoform 2 of A-kinase anchor protein 12 O	1	2462	0	NaN	NaN	NaN	NaN	NaN	NaN	NaN	NaN	NaN	NaN	NaN	NaN	NaN	NaN	NaN	NaN	NaN
UID10094	S	2	___1	AAS(0.077)LS(0.697)S(0.225)IPSGIER	0.697441	1.85e-23	167.05	140.07	167.05	-0.055558	120150000	186	0	NaN	0	NaN	NaN	0.697441	NaN	NaN	NaN	Q03001-13	186	Q03001-13	Q03001-13	Dystonin	DST	QEKTDVFSFRKAASLSSIPSGIERSLEKGGF	sp|Q03001-13|DYST_HUMAN Isoform 8 of Dystonin OS=Homo sapiens OX=9606 GN=DST	1	2465	0	NaN	NaN	NaN	NaN	NaN	NaN	NaN	NaN	NaN	NaN	NaN	NaN	NaN	NaN	NaN	NaN	NaN
UID10130	S	3	___1	LAVISDS(1)GEK	0.999986	6.68e-06	111.12	52.449	103.44	-0.33773	30908000	2917	NaN	0.999585	0.999986	0.994796	NaN	0.999784	NaN	NaN	NaN	Q03164-2;Q03164;Q03164-3	2917;2955;2958	Q03164-2	Q03164-2	Histone-lysine N-methyltransferase 2A;MLL cleavage product N320;MLL cleavage product C180	KMT2A	TVPSQNPSRLAVISDSGEKRVTITEKSVASS	sp|Q03164-2|KMT2A_HUMAN Isoform 2 of Histone-lysine N-methyltransferase 2A OS=Homo sapiens OX=9606 GN=KMT2A;sp|Q03164|KMT2A_HUMAN Histone-lysine N-methyltransferase 2A OS=Homo sapiens OX=9606 GN=KMT2A PE=1 SV=5;sp|Q03164-3|KMT2A_HUMAN Isoform 3 of Histone-	1	2471	0	NaN	NaN	NaN	NaN	NaN	NaN	NaN	NaN	NaN	NaN	NaN	NaN	NaN	NaN	NaN	NaN	NaN
UID10255	S	3	___1	S(0.998)LNS(0.002)VVTSEPDK	0.998394	6.77e-11	138.05	119.68	134.76	0.31321	73089000	1395	NaN	NaN	0.998394	NaN	NaN	0.994397	NaN	NaN	NaN	Q04656-5;Q04656;Q04656-2;Q04656-3;Q04656-4	1395;1473;1487;1554;476	Q04656-5	Q04656-5	Copper-transporting ATPase 1	ATP7A	NYSRASINSLLSDKRSLNSVVTSEPDKHSLL	sp|Q04656-5|ATP7A_HUMAN Isoform 5 of Copper-transporting ATPase 1 OS=Homo sapiens OX=9606 GN=ATP7A;sp|Q04656|ATP7A_HUMAN Copper-transporting ATPase 1 OS=Homo sapiens OX=9606 GN=ATP7A PE=1 SV=4;sp|Q04656-2|ATP7A_HUMAN Isoform 1 of Copper-transporting ATPase	1	2485	0	NaN	NaN	NaN	NaN	NaN	NaN	NaN	NaN	NaN	NaN	NaN	NaN	NaN	NaN	NaN	NaN	NaN
UID10299	S	3	___1	ALINS(1)MDQNMFR	1	0.0147962	52.009	40.161	52.009	-1.4645	21520000	560	NaN	NaN	NaN	NaN	NaN	1	NaN	NaN	NaN	Q04759-3;Q04759;Q04759-2	560;685;622	Q04759-3	Q04759-3	Protein kinase C theta type	PRKCQ	NEKPRLSFADRALINSMDQNMFRNFSFMNPG	sp|Q04759-3|KPCT_HUMAN Isoform 3 of Protein kinase C theta type OS=Homo sapiens OX=9606 GN=PRKCQ;sp|Q04759|KPCT_HUMAN Protein kinase C theta type OS=Homo sapiens OX=9606 GN=PRKCQ PE=1 SV=3;sp|Q04759-2|KPCT_HUMAN Isoform 2 of Protein kinase C theta type OS=	1	2491	0	NaN	NaN	NaN	NaN	NaN	NaN	NaN	NaN	NaN	NaN	NaN	NaN	NaN	NaN	NaN	NaN	NaN
UID10367	S	3	___1	GS(0.5)S(0.5)LKIEER	0.5	0.0118995	60.157	41.377	60.157	0.037004	76586000	381	NaN	NaN	NaN	NaN	0.5	0	NaN	NaN	NaN	Q05682;Q05682-3;Q05682-6;Q05682-2;Q05682-5;Q05682-4	642;407;413;413;381;387	Q05682;Q05682-3;Q05682-5	Q05682-5	Caldesmon	CALD1	LSDDKKPFKCFTPKGSSLKIEERAEFLNKSV	sp|Q05682|CALD1_HUMAN Caldesmon OS=Homo sapiens OX=9606 GN=CALD1 PE=1 SV=3;sp|Q05682-3|CALD1_HUMAN Isoform 3 of Caldesmon OS=Homo sapiens OX=9606 GN=CALD1;sp|Q05682-6|CALD1_HUMAN Isoform 6 of Caldesmon OS=Homo sapiens OX=9606 GN=CALD1;sp|Q05682-2|CALD1_HUM	1	2508;2509;2510	0	NaN	NaN	NaN	NaN	NaN	NaN	NaN	NaN	NaN	NaN	NaN	NaN	NaN	NaN	NaN	NaN	NaN
UID10473	S	3	___1	T(0.158)PS(0.721)T(0.121)EAAHIMLR	0.721069	1.65e-05	105.99	89.462	97.273	-0.53302	62890000	978	0.721069	NaN	NaN	NaN	0.558639	NaN	NaN	NaN	NaN	Q07157	978	Q07157	Q07157	Tight junction protein ZO-1	TJP1	PSTSYSPQADSLRTPSTEAAHIMLRDQEPSL	sp|Q07157|ZO1_HUMAN Tight junction protein ZO-1 OS=Homo sapiens OX=9606 GN=TJP1 PE=1 SV=3	1	2532	0	NaN	NaN	NaN	NaN	NaN	NaN	NaN	NaN	NaN	NaN	NaN	NaN	NaN	NaN	NaN	NaN	NaN
UID10487	S	4	___1	ASPATQPPPLLPPS(0.006)AT(0.006)GPDAT(0.006)VGGPAPT(0.1)PLLPPS(0.687)AT(0.121)AS(0.075)VK	0.687073	2.81e-12	84.098	70.15	78.621	0.37787	58811000	90	0.464621	NaN	0	0.42873	0	0.687073	0.441671	0	0.475156	Q07666;Q07666-3	90;90	Q07666	Q07666	KH domain-containing, RNA-binding, signal transduction-associated protein 1	KHDRBS1	DATVGGPAPTPLLPPSATASVKMEPENKYLP	sp|Q07666|KHDR1_HUMAN KH domain-containing, RNA-binding, signal transduction-associated protein 1 OS=Homo sapiens OX=9606 GN=KHDRBS1 PE=1 SV=1;sp|Q07666-3|KHDR1_HUMAN Isoform 3 of KH domain-containing, RNA-binding, signal transduction-associated protein 1	1	2536	0	NaN	NaN	NaN	NaN	NaN	NaN	NaN	NaN	NaN	NaN	NaN	NaN	NaN	NaN	NaN	NaN	NaN
UID10504	S	3	___1	YES(1)GPDGGEEDGTGSLKR	0.999994	8.62e-08	122.34	105.19	122.34	0.42599	128740000	534	0.999975	NaN	NaN	NaN	NaN	0.999994	0	NaN	NaN	Q07866-6	534	Q07866-6	Q07866-6	Kinesin light chain 1	KLC1	RRSRESLNVDVVKYESGPDGGEEDGTGSLKR	sp|Q07866-6|KLC1_HUMAN Isoform N of Kinesin light chain 1 OS=Homo sapiens OX=9606 GN=KLC1	1	2540	0	NaN	NaN	NaN	NaN	NaN	NaN	NaN	NaN	NaN	NaN	NaN	NaN	NaN	NaN	NaN	NaN	NaN
UID10509	S	3	___1	IPESET(0.004)ES(0.145)T(0.62)AS(0.9)APNS(0.331)PR	0.900247	7.96e-05	94.461	62.633	78.932	-0.21317	324690000	1078	0.765745	0.524908	NaN	0	0.900247	0.705535	NaN	0.654655	0.710487	Q07889	1078	Q07889	Q07889	Son of sevenless homolog 1	SOS1	ISYSRIPESETESTASAPNSPRTPLTPPPAS	sp|Q07889|SOS1_HUMAN Son of sevenless homolog 1 OS=Homo sapiens OX=9606 GN=SOS1 PE=1 SV=1	1;2	2541	0	NaN	NaN	NaN	NaN	NaN	NaN	NaN	NaN	NaN	NaN	NaN	NaN	NaN	NaN	NaN	NaN	NaN
UID10525	S	4	___1	KT(0.5)S(0.5)PAPGGPAGEGPLQSLTCLIGEK	0.5	6.08e-22	138.16	115.29	138.16	0.67845	36726000	102	NaN	NaN	NaN	0.5	0.5	NaN	NaN	NaN	NaN	Q07912;Q07912-3;Q07912-2	102;126;102	Q07912	Q07912	Activated CDC42 kinase 1	TNK2	AEFPPHHSQSTFRKTSPAPGGPAGEGPLQSL	sp|Q07912|ACK1_HUMAN Activated CDC42 kinase 1 OS=Homo sapiens OX=9606 GN=TNK2 PE=1 SV=3;sp|Q07912-3|ACK1_HUMAN Isoform 3 of Activated CDC42 kinase 1 OS=Homo sapiens OX=9606 GN=TNK2;sp|Q07912-2|ACK1_HUMAN Isoform 2 of Activated CDC42 kinase 1 OS=Homo sapien	1	2543	0	NaN	NaN	NaN	NaN	NaN	NaN	NaN	NaN	NaN	NaN	NaN	NaN	NaN	NaN	NaN	NaN	NaN
UID10535	S	3	___1	S(0.983)ENRVVVS(0.017)GLPPSGSWQDLK	0.982719	1.4e-18	148.49	120.78	93.446	0.22885	154000000	119	NaN	0	NaN	0	0.982719	0.743628	0.860385	0.757461	0	Q07955;Q07955-3;Q07955-2	119;119;119	Q07955	Q07955	Serine/arginine-rich splicing factor 1	SRSF1	GGGAPRGRYGPPSRRSENRVVVSGLPPSGSW	sp|Q07955|SRSF1_HUMAN Serine/arginine-rich splicing factor 1 OS=Homo sapiens OX=9606 GN=SRSF1 PE=1 SV=2;sp|Q07955-3|SRSF1_HUMAN Isoform ASF-3 of Serine/arginine-rich splicing factor 1 OS=Homo sapiens OX=9606 GN=SRSF1;sp|Q07955-2|SRSF1_HUMAN Isoform ASF-2 o	1	2545	0	NaN	NaN	NaN	NaN	NaN	NaN	NaN	NaN	NaN	NaN	NaN	NaN	NaN	NaN	NaN	NaN	NaN
UID10563	S	3	___1	ECSEFGHSDTCWMPGQS(0.606)S(0.351)PS(0.043)R	0.606445	7.62e-11	107.83	91.498	107.83	-0.38565	75050000	1139	NaN	0	NaN	0	NaN	0.606445	NaN	NaN	NaN	Q08174-2	1139	Q08174-2	Q08174-2	Protocadherin-1	PCDH1	CSEFGHSDTCWMPGQSSPSRRTKSSALKLST	sp|Q08174-2|PCDH1_HUMAN Isoform 2 of Protocadherin-1 OS=Homo sapiens OX=9606 GN=PCDH1	1	2549	0	NaN	NaN	NaN	NaN	NaN	NaN	NaN	NaN	NaN	NaN	NaN	NaN	NaN	NaN	NaN	NaN	NaN
UID10574	S	4	___1	T(0.458)T(0.542)PDGS(1)IGEMEHPENDLRPLPDVAMTGTCTR	1	5.68e-65	176.12	152	176.12	-0.40928	858210000	1097	0.999946	0.999961	0	0.989566	0.935961	0.992561	1	NaN	0	Q08174-2	1097	Q08174-2	Q08174-2	Protocadherin-1	PCDH1	LALPEDHYERTTPDGSIGEMEHPENDLRPLP	sp|Q08174-2|PCDH1_HUMAN Isoform 2 of Protocadherin-1 OS=Homo sapiens OX=9606 GN=PCDH1	1;2	2549	0	NaN	NaN	NaN	NaN	NaN	NaN	NaN	NaN	NaN	NaN	NaN	NaN	NaN	NaN	NaN	NaN	NaN
UID10580	S	3	___1	SSVNCPFS(0.435)S(0.565)QDMK	0.56506	0.00409993	62.055	47.365	62.055	0.073511	24098000	1033	0	NaN	NaN	NaN	0.56506	NaN	NaN	NaN	NaN	Q08211	1033	Q08211	Q08211	ATP-dependent RNA helicase A	DHX9	RNALIHKSSVNCPFSSQDMKYPSPFFVFGEK	sp|Q08211|DHX9_HUMAN ATP-dependent RNA helicase A OS=Homo sapiens OX=9606 GN=DHX9 PE=1 SV=4	1	2551	0	NaN	NaN	NaN	NaN	NaN	NaN	NaN	NaN	NaN	NaN	NaN	NaN	NaN	NaN	NaN	NaN	NaN
UID10614	S	3	___1	EWQSLAGS(0.997)PS(0.003)SKL	0.997157	1.32e-06	118.48	92.115	106.67	-0.15786	111760000	622	NaN	NaN	0	0.980138	NaN	0.997157	NaN	NaN	0.991751	Q08426-2;Q08426	622;718	Q08426-2	Q08426-2	Peroxisomal bifunctional enzyme;Enoyl-CoA hydratase/3,2-trans-enoyl-CoA isomerase;3-hydroxyacyl-CoA dehydrogenase	EHHADH	SQGNPPLKEWQSLAGSPSSKL__________	sp|Q08426-2|ECHP_HUMAN Isoform 2 of Peroxisomal bifunctional enzyme OS=Homo sapiens OX=9606 GN=EHHADH;sp|Q08426|ECHP_HUMAN Peroxisomal bifunctional enzyme OS=Homo sapiens OX=9606 GN=EHHADH PE=1 SV=3	1	2560	0	NaN	NaN	NaN	NaN	NaN	NaN	NaN	NaN	NaN	NaN	NaN	NaN	NaN	NaN	NaN	NaN	NaN
UID10710	S	4	___1	S(0.442)KS(0.558)MDKSDEELQFPK	0.557588	1.96e-11	137.05	104.89	137.05	0.035793	39957000	505	NaN	NaN	NaN	0.472685	NaN	0.557588	NaN	0.49766	NaN	Q08AE8-3;Q08AE8-5;Q08AE8-2;Q08AE8	505;544;664;678	Q08AE8-3	Q08AE8-3	Protein spire homolog 1	SPIRE1	HRPLRSIARFSSKSKSMDKSDEELQFPKELM	sp|Q08AE8-3|SPIR1_HUMAN Isoform 3 of Protein spire homolog 1 OS=Homo sapiens OX=9606 GN=SPIRE1;sp|Q08AE8-5|SPIR1_HUMAN Isoform 5 of Protein spire homolog 1 OS=Homo sapiens OX=9606 GN=SPIRE1;sp|Q08AE8-2|SPIR1_HUMAN Isoform 2 of Protein spire homolog 1 OS=Ho	1	2572	0	NaN	NaN	NaN	NaN	NaN	NaN	NaN	NaN	NaN	NaN	NaN	NaN	NaN	NaN	NaN	NaN	NaN
UID10750	S	3	___1	S(0.019)S(0.021)KAS(0.957)LGS(0.45)LEGEAEAEAS(0.948)S(0.606)PK	0.947512	4.55e-72	204.12	186.32	93.147	0.15807	2360500000	5762	0.672248	0.947512	0.53559	0.616515	0.716925	0.618003	0	0	0.606532	Q09666	5762	Q09666	Q09666	Neuroblast differentiation-associated protein AHNAK	AHNAK	KASLGSLEGEAEAEASSPKGKFSLFKSKKPR	sp|Q09666|AHNK_HUMAN Neuroblast differentiation-associated protein AHNAK OS=Homo sapiens OX=9606 GN=AHNAK PE=1 SV=2	1;2;3	2580	0	NaN	NaN	NaN	NaN	NaN	NaN	NaN	NaN	NaN	NaN	NaN	NaN	NaN	NaN	NaN	NaN	NaN
UID10755	S	3	___1	EFS(0.996)GPS(0.015)T(0.585)PT(0.383)GT(0.021)LEFEGGEVSLEGGK	0.996283	9.23e-51	145.34	133.19	112.85	-0.021597	2044700000	5790	0.993555	0.980534	0.996283	0.992839	0.986102	0.995112	0.995139	0.976793	0.994259	Q09666	5790	Q09666	Q09666	Neuroblast differentiation-associated protein AHNAK	AHNAK	KPRHRSNSFSDEREFSGPSTPTGTLEFEGGE	sp|Q09666|AHNK_HUMAN Neuroblast differentiation-associated protein AHNAK OS=Homo sapiens OX=9606 GN=AHNAK PE=1 SV=2	1;2;3	2580	0	NaN	NaN	NaN	NaN	NaN	NaN	NaN	NaN	NaN	NaN	NaN	NaN	NaN	NaN	NaN	NaN	NaN
UID10775	S	4	___1	GGLKGS(1)EVGFHGAAPDISVK	1	1.3e-34	170.82	150.43	170.82	0.10606	247740000	5530	NaN	0	0.999999	NaN	1	NaN	0	NaN	NaN	Q09666	5530	Q09666	Q09666	Neuroblast differentiation-associated protein AHNAK	AHNAK	TGQISGPEIKGGLKGSEVGFHGAAPDISVKG	sp|Q09666|AHNK_HUMAN Neuroblast differentiation-associated protein AHNAK OS=Homo sapiens OX=9606 GN=AHNAK PE=1 SV=2	1	2580	0	NaN	NaN	NaN	NaN	NaN	NaN	NaN	NaN	NaN	NaN	NaN	NaN	NaN	NaN	NaN	NaN	NaN
UID10792	S	4	___1	GPS(1)LKGDLDASVPSMK	0.999999	1.93e-07	123.19	105.49	123.19	-0.32607	98836000	5310	NaN	NaN	NaN	NaN	0	0.999999	NaN	0	0.998222	Q09666	5310	Q09666	Q09666	Neuroblast differentiation-associated protein AHNAK	AHNAK	PKVSGPDLDLNLKGPSLKGDLDASVPSMKVH	sp|Q09666|AHNK_HUMAN Neuroblast differentiation-associated protein AHNAK OS=Homo sapiens OX=9606 GN=AHNAK PE=1 SV=2	1	2580	0	NaN	NaN	NaN	NaN	NaN	NaN	NaN	NaN	NaN	NaN	NaN	NaN	NaN	NaN	NaN	NaN	NaN
UID10808	S	3	___1	IS(1)MPDVDFNLK	1	1.95e-07	135.81	99.522	135.81	0.19804	54911000	2313	NaN	1	NaN	NaN	1	NaN	NaN	1	0	Q09666	2313	Q09666	Q09666	Neuroblast differentiation-associated protein AHNAK	AHNAK	PKFKMPEMHFKTPKISMPDVDFNLKGPKIKG	sp|Q09666|AHNK_HUMAN Neuroblast differentiation-associated protein AHNAK OS=Homo sapiens OX=9606 GN=AHNAK PE=1 SV=2	1	2580	0	NaN	NaN	NaN	NaN	NaN	NaN	NaN	NaN	NaN	NaN	NaN	NaN	NaN	NaN	NaN	NaN	NaN
UID10840	S	3	___1	S(0.57)S(0.43)GCDVNLPGVNVK	0.569588	2.74e-05	98.508	82.202	98.508	-0.32831	134650000	5499	0	NaN	0	NaN	NaN	0.569588	NaN	0	NaN	Q09666	5499	Q09666	Q09666	Neuroblast differentiation-associated protein AHNAK	AHNAK	GVQGLEGNLQMPGIKSSGCDVNLPGVNVKLP	sp|Q09666|AHNK_HUMAN Neuroblast differentiation-associated protein AHNAK OS=Homo sapiens OX=9606 GN=AHNAK PE=1 SV=2	1	2580	0	NaN	NaN	NaN	NaN	NaN	NaN	NaN	NaN	NaN	NaN	NaN	NaN	NaN	NaN	NaN	NaN	NaN
UID10896	S	3	___1	S(0.5)DS(0.5)LILDHQWELEK	0.5	1.78e-05	103.66	71.32	103.66	-0.21148	131170000	1368	NaN	0	NaN	NaN	0.5	NaN	NaN	NaN	0	Q12756;Q12756-3;Q12756-2	1368;1469;1477	Q12756	Q12756	Kinesin-like protein KIF1A	KIF1A	AYVRGEENLAGWRPRSDSLILDHQWELEKLS	sp|Q12756|KIF1A_HUMAN Kinesin-like protein KIF1A OS=Homo sapiens OX=9606 GN=KIF1A PE=1 SV=2;sp|Q12756-3|KIF1A_HUMAN Isoform 3 of Kinesin-like protein KIF1A OS=Homo sapiens OX=9606 GN=KIF1A;sp|Q12756-2|KIF1A_HUMAN Isoform 2 of Kinesin-like protein KIF1A OS=	1	2596	0	NaN	NaN	NaN	NaN	NaN	NaN	NaN	NaN	NaN	NaN	NaN	NaN	NaN	NaN	NaN	NaN	NaN
UID10897	S	3	___1	S(0.261)DS(0.739)LILDHQWELEK	0.739149	6.23e-25	151.63	123.91	151.63	0.20392	131170000	1370	NaN	0	NaN	NaN	0.5	NaN	NaN	0.739149	0	Q12756;Q12756-3;Q12756-2	1370;1471;1479	Q12756	Q12756	Kinesin-like protein KIF1A	KIF1A	VRGEENLAGWRPRSDSLILDHQWELEKLSLL	sp|Q12756|KIF1A_HUMAN Kinesin-like protein KIF1A OS=Homo sapiens OX=9606 GN=KIF1A PE=1 SV=2;sp|Q12756-3|KIF1A_HUMAN Isoform 3 of Kinesin-like protein KIF1A OS=Homo sapiens OX=9606 GN=KIF1A;sp|Q12756-2|KIF1A_HUMAN Isoform 2 of Kinesin-like protein KIF1A OS=	1	2596	0	NaN	NaN	NaN	NaN	NaN	NaN	NaN	NaN	NaN	NaN	NaN	NaN	NaN	NaN	NaN	NaN	NaN
UID10922	S	3	___1	ALVS(0.973)S(0.027)ESYLQR	0.973442	1.22e-07	138.15	106.66	138.15	-0.00099561	98708000	1136	NaN	NaN	NaN	NaN	0.973442	0.499998	NaN	0.71371	0	Q12774;Q12774-2	1136;58	Q12774	Q12774	Rho guanine nucleotide exchange factor 5	ARHGEF5	TPGPSSPRQPRKALVSSESYLQRLSMASSGS	sp|Q12774|ARHG5_HUMAN Rho guanine nucleotide exchange factor 5 OS=Homo sapiens OX=9606 GN=ARHGEF5 PE=1 SV=3;sp|Q12774-2|ARHG5_HUMAN Isoform 2 of Rho guanine nucleotide exchange factor 5 OS=Homo sapiens OX=9606 GN=ARHGEF5	1	2603	0	NaN	NaN	NaN	NaN	NaN	NaN	NaN	NaN	NaN	NaN	NaN	NaN	NaN	NaN	NaN	NaN	NaN
UID10923	S	3	___1	ALVS(0.5)S(0.5)ESYLQR	0.499998	5.25e-07	130.15	108.78	130.15	-0.19086	57519000	1137	NaN	NaN	NaN	NaN	NaN	0.499998	NaN	NaN	0	Q12774;Q12774-2	1137;59	Q12774	Q12774	Rho guanine nucleotide exchange factor 5	ARHGEF5	PGPSSPRQPRKALVSSESYLQRLSMASSGSL	sp|Q12774|ARHG5_HUMAN Rho guanine nucleotide exchange factor 5 OS=Homo sapiens OX=9606 GN=ARHGEF5 PE=1 SV=3;sp|Q12774-2|ARHG5_HUMAN Isoform 2 of Rho guanine nucleotide exchange factor 5 OS=Homo sapiens OX=9606 GN=ARHGEF5	1	2603	0	NaN	NaN	NaN	NaN	NaN	NaN	NaN	NaN	NaN	NaN	NaN	NaN	NaN	NaN	NaN	NaN	NaN
UID10953	S	4	___1	WPAS(1)PGSHSNDDFDNWSTFRPR	1	6.84e-287	320.96	302.87	320.96	0.020693	281200000	298	0.999967	0	0.491875	0.999996	0	1	0.98622	NaN	0.999995	Q12778	298	Q12778	Q12778	Forkhead box protein O1	FOXO1	GAGDSPGSQFSKWPASPGSHSNDDFDNWSTF	sp|Q12778|FOXO1_HUMAN Forkhead box protein O1 OS=Homo sapiens OX=9606 GN=FOXO1 PE=1 SV=2	1;2	2604	0	NaN	NaN	NaN	NaN	NaN	NaN	NaN	NaN	NaN	NaN	NaN	NaN	NaN	NaN	NaN	NaN	NaN
UID10956	S	4	___1	YTYGQS(0.004)S(0.03)MS(0.966)PLPQMPIQTLQDNK	0.965994	6.04e-29	150.94	129.94	150.94	-0.44431	42572000	432	NaN	NaN	NaN	NaN	NaN	0.965994	NaN	NaN	NaN	Q12778	432	Q12778	Q12778	Forkhead box protein O1	FOXO1	PSPNYQKYTYGQSSMSPLPQMPIQTLQDNKS	sp|Q12778|FOXO1_HUMAN Forkhead box protein O1 OS=Homo sapiens OX=9606 GN=FOXO1 PE=1 SV=2	1	2604	0	NaN	NaN	NaN	NaN	NaN	NaN	NaN	NaN	NaN	NaN	NaN	NaN	NaN	NaN	NaN	NaN	NaN
UID10983	S	3	___1	S(0.007)S(0.007)GNS(0.703)S(0.159)S(0.056)S(0.056)GS(0.012)GSGSTSAGSSSPGAR	0.703249	4.97e-10	91.086	79.11	91.086	-0.28416	4277300	13	0	0	0.703249	0.13455	0	0	0.123884	0.141988	0.138781	Q12797;Q12797-7;Q12797-6;Q12797-11;Q12797-2	13;13;13;13;13	Q12797	Q12797	Aspartyl/asparaginyl beta-hydroxylase	ASPH	___MAQRKNAKSSGNSSSSGSGSGSTSAGSS	sp|Q12797|ASPH_HUMAN Aspartyl/asparaginyl beta-hydroxylase OS=Homo sapiens OX=9606 GN=ASPH PE=1 SV=3;sp|Q12797-7|ASPH_HUMAN Isoform 7 of Aspartyl/asparaginyl beta-hydroxylase OS=Homo sapiens OX=9606 GN=ASPH;sp|Q12797-6|ASPH_HUMAN Isoform 6 of Aspartyl/aspa	1	2610	0	NaN	NaN	NaN	NaN	NaN	NaN	NaN	NaN	NaN	NaN	NaN	NaN	NaN	NaN	NaN	NaN	NaN
UID10985	S	3	___1	S(0.009)S(0.009)GNS(0.054)S(0.148)S(0.563)S(0.207)GS(0.01)GS(0.001)GSTSAGSSSPGAR	0.562623	1.95e-26	144.04	126.55	77.233	0.66667	8329700	15	0.458786	0	0.287401	0.13455	0.329303	0.562623	0.417014	0.141988	0.389381	Q12797;Q12797-7;Q12797-6;Q12797-11;Q12797-2	15;15;15;15;15	Q12797	Q12797	Aspartyl/asparaginyl beta-hydroxylase	ASPH	_MAQRKNAKSSGNSSSSGSGSGSTSAGSSSP	sp|Q12797|ASPH_HUMAN Aspartyl/asparaginyl beta-hydroxylase OS=Homo sapiens OX=9606 GN=ASPH PE=1 SV=3;sp|Q12797-7|ASPH_HUMAN Isoform 7 of Aspartyl/asparaginyl beta-hydroxylase OS=Homo sapiens OX=9606 GN=ASPH;sp|Q12797-6|ASPH_HUMAN Isoform 6 of Aspartyl/aspa	1	2610	0	NaN	NaN	NaN	NaN	NaN	NaN	NaN	NaN	NaN	NaN	NaN	NaN	NaN	NaN	NaN	NaN	NaN
UID10988	S	3	___1	SSGNSS(0.001)S(0.006)S(0.008)GS(0.043)GS(0.87)GS(0.063)T(0.008)S(0.002)AGSSSPGAR	0.869647	3e-51	174.98	153.75	108.77	-0.027698	13855000	20	0	0.746263	0.453346	0.269433	0.155305	0.869647	0.123884	0.77556	0	Q12797;Q12797-7;Q12797-6;Q12797-11;Q12797-2	20;20;20;20;20	Q12797	Q12797	Aspartyl/asparaginyl beta-hydroxylase	ASPH	KNAKSSGNSSSSGSGSGSTSAGSSSPGARRE	sp|Q12797|ASPH_HUMAN Aspartyl/asparaginyl beta-hydroxylase OS=Homo sapiens OX=9606 GN=ASPH PE=1 SV=3;sp|Q12797-7|ASPH_HUMAN Isoform 7 of Aspartyl/asparaginyl beta-hydroxylase OS=Homo sapiens OX=9606 GN=ASPH;sp|Q12797-6|ASPH_HUMAN Isoform 6 of Aspartyl/aspa	1	2610	0	NaN	NaN	NaN	NaN	NaN	NaN	NaN	NaN	NaN	NaN	NaN	NaN	NaN	NaN	NaN	NaN	NaN
UID11010	S	4	___1	ENWCTIEPCPDAAS(0.004)LLAS(0.553)KQS(0.444)PECENFLDVGLGR	0.552678	1.23e-36	120.47	110.2	120.47	0.30205	11013000	1408	NaN	NaN	NaN	0.497569	0.552678	NaN	NaN	0.466043	NaN	Q12802;Q12802-2;Q12802-4	1408;1408;1408	Q12802;Q12802-4	Q12802-4	A-kinase anchor protein 13	AKAP13	WCTIEPCPDAASLLASKQSPECENFLDVGLG	sp|Q12802|AKP13_HUMAN A-kinase anchor protein 13 OS=Homo sapiens OX=9606 GN=AKAP13 PE=1 SV=2;sp|Q12802-2|AKP13_HUMAN Isoform 2 of A-kinase anchor protein 13 OS=Homo sapiens OX=9606 GN=AKAP13;sp|Q12802-4|AKP13_HUMAN Isoform 3 of A-kinase anchor protein 13 O	1	2612;2613	0	NaN	NaN	NaN	NaN	NaN	NaN	NaN	NaN	NaN	NaN	NaN	NaN	NaN	NaN	NaN	NaN	NaN
UID11032	S	3	___1	S(0.757)GS(0.243)LDSELSVSPK	0.757075	1.81e-16	142.45	118.85	116.58	0.46605	164750000	2698	0	0.498087	0.499885	0.757075	0.57663	0	NaN	NaN	0	Q12802;Q12802-2;Q12802-4	2718;2722;2698	Q12802;Q12802-4	Q12802-4	A-kinase anchor protein 13	AKAP13	SPEEPPSPSAPSIAKSGSLDSELSVSPKRNS	sp|Q12802|AKP13_HUMAN A-kinase anchor protein 13 OS=Homo sapiens OX=9606 GN=AKAP13 PE=1 SV=2;sp|Q12802-2|AKP13_HUMAN Isoform 2 of A-kinase anchor protein 13 OS=Homo sapiens OX=9606 GN=AKAP13;sp|Q12802-4|AKP13_HUMAN Isoform 3 of A-kinase anchor protein 13 O	1	2612;2613	0	NaN	NaN	NaN	NaN	NaN	NaN	NaN	NaN	NaN	NaN	NaN	NaN	NaN	NaN	NaN	NaN	NaN
UID11060	S	5	___1	KVT(0.098)S(0.533)S(0.369)PITSEEESNLSNDFIDENGLPINK	0.533005	3.1e-55	167.88	153.82	167.88	0.73497	51548000	1672	0.412557	0.478817	0	0.281105	0.533005	0.472699	NaN	0	0	Q12830-4;Q12830-2;Q12830	1672;1546;1672	Q12830-4	Q12830-4	Nucleosome-remodeling factor subunit BPTF	BPTF	VEDMEIETSEVKKVTSSPITSEEESNLSNDF	sp|Q12830-4|BPTF_HUMAN Isoform 4 of Nucleosome-remodeling factor subunit BPTF OS=Homo sapiens OX=9606 GN=BPTF;sp|Q12830-2|BPTF_HUMAN Isoform 2 of Nucleosome-remodeling factor subunit BPTF OS=Homo sapiens OX=9606 GN=BPTF;sp|Q12830|BPTF_HUMAN Nucleosome-remo	1	2617	0	NaN	NaN	NaN	NaN	NaN	NaN	NaN	NaN	NaN	NaN	NaN	NaN	NaN	NaN	NaN	NaN	NaN
UID11074	S	3	___1	LS(1)GKPQNAPEGYQNR	1	0.000387589	83.849	56.88	83.849	1.1482	81278000	134	NaN	NaN	NaN	NaN	NaN	1	1	NaN	0	Q12834	134	Q12834	Q12834	Cell division cycle protein 20 homolog	CDC20	NLNGFDVEEAKILRLSGKPQNAPEGYQNRLK	sp|Q12834|CDC20_HUMAN Cell division cycle protein 20 homolog OS=Homo sapiens OX=9606 GN=CDC20 PE=1 SV=2	1	2618	0	NaN	NaN	NaN	NaN	NaN	NaN	NaN	NaN	NaN	NaN	NaN	NaN	NaN	NaN	NaN	NaN	NaN
UID11099	S	4	___1	GVS(1)QEKEAQISSAIVSSVQSK	1	7.98e-36	162.47	133.28	162.47	0.046516	31395000	961	NaN	NaN	NaN	NaN	1	NaN	NaN	NaN	NaN	Q12872-2;Q12872	961;909	Q12872-2	Q12872-2	Splicing factor, suppressor of white-apricot homolog	SFSWAP	PVESRGSSQERSRGVSQEKEAQISSAIVSSV	sp|Q12872-2|SFSWA_HUMAN Isoform 2 of Splicing factor, suppressor of white-apricot homolog OS=Homo sapiens OX=9606 GN=SFSWAP;sp|Q12872|SFSWA_HUMAN Splicing factor, suppressor of white-apricot homolog OS=Homo sapiens OX=9606 GN=SFSWAP PE=1 SV=3	1	2626	0	NaN	NaN	NaN	NaN	NaN	NaN	NaN	NaN	NaN	NaN	NaN	NaN	NaN	NaN	NaN	NaN	NaN
UID11246	S	3	___1	LS(1)LYPGDTIK	0.999953	0.000504412	85.522	60.73	85.522	0.2449	45052000	502	0.959885	0.995984	0.999911	0.903562	0.99892	0.989384	0.999953	NaN	0.999777	Q12923-3;Q12923;Q12923-4;Q12923-2	502;502;502;502	Q12923-3	Q12923-3	Tyrosine-protein phosphatase non-receptor type 13	PTPN13	LMQLQAKMALRQSRLSLYPGDTIKASMLDIT	sp|Q12923-3|PTN13_HUMAN Isoform 3 of Tyrosine-protein phosphatase non-receptor type 13 OS=Homo sapiens OX=9606 GN=PTPN13;sp|Q12923|PTN13_HUMAN Tyrosine-protein phosphatase non-receptor type 13 OS=Homo sapiens OX=9606 GN=PTPN13 PE=1 SV=2;sp|Q12923-4|PTN13_H	1	2636	0	NaN	NaN	NaN	NaN	NaN	NaN	NaN	NaN	NaN	NaN	NaN	NaN	NaN	NaN	NaN	NaN	NaN
UID11247	S	4	___1	RFESSSGLPGVDETLS(0.003)QGQS(0.102)QRPS(0.895)R	0.895215	2.95e-33	158.57	145.77	158.57	-0.8208	85276000	462	NaN	NaN	NaN	NaN	0.895215	NaN	NaN	NaN	0	Q12923-3;Q12923;Q12923-4;Q12923-2	462;462;462;462	Q12923-3	Q12923-3	Tyrosine-protein phosphatase non-receptor type 13	PTPN13	PGVDETLSQGQSQRPSRQYETPFEGNLINQE	sp|Q12923-3|PTN13_HUMAN Isoform 3 of Tyrosine-protein phosphatase non-receptor type 13 OS=Homo sapiens OX=9606 GN=PTPN13;sp|Q12923|PTN13_HUMAN Tyrosine-protein phosphatase non-receptor type 13 OS=Homo sapiens OX=9606 GN=PTPN13 PE=1 SV=2;sp|Q12923-4|PTN13_H	1	2636	0	NaN	NaN	NaN	NaN	NaN	NaN	NaN	NaN	NaN	NaN	NaN	NaN	NaN	NaN	NaN	NaN	NaN
UID11259	S	3	___1	AAEAFS(0.999)ELS(0.001)K	0.999477	0.00582245	62.14	33.813	62.14	0.1764	3284600	295	NaN	NaN	0	NaN	NaN	0.999477	NaN	NaN	0	Q12929;Q12929-2	295;35	Q12929	Q12929	Epidermal growth factor receptor kinase substrate 8	EPS8	IEFFITKLQKAAEAFSELSKRKKNKKGKRKG	sp|Q12929|EPS8_HUMAN Epidermal growth factor receptor kinase substrate 8 OS=Homo sapiens OX=9606 GN=EPS8 PE=1 SV=1;sp|Q12929-2|EPS8_HUMAN Isoform 2 of Epidermal growth factor receptor kinase substrate 8 OS=Homo sapiens OX=9606 GN=EPS8	1	2638	0	NaN	NaN	NaN	NaN	NaN	NaN	NaN	NaN	NaN	NaN	NaN	NaN	NaN	NaN	NaN	NaN	NaN
UID11315	S	3	___1	QQS(0.947)T(0.058)S(0.538)S(0.456)DRVS(0.001)QTPESLDFLK	0.947193	1.24e-09	125.16	92.666	88.239	0.31167	529770000	1002	NaN	0.493787	0.513543	0.536197	0.676191	0.931349	0.730544	0.825896	0.947193	Q12965	1002	Q12965	Q12965	Unconventional myosin-Ie	MYO1E	SLYTSMARPPLPRQQSTSSDRVSQTPESLDF	sp|Q12965|MYO1E_HUMAN Unconventional myosin-Ie OS=Homo sapiens OX=9606 GN=MYO1E PE=1 SV=2	1;2	2646	0	NaN	NaN	NaN	NaN	NaN	NaN	NaN	NaN	NaN	NaN	NaN	NaN	NaN	NaN	NaN	NaN	NaN
UID11329	S	3	___1	S(0.682)S(0.313)VT(0.005)DENWLSPR	0.682428	1.93e-19	176.83	154.77	176.83	0.20823	35703000	247	0	NaN	NaN	0	NaN	0.682428	NaN	NaN	NaN	Q12968;Q12968-5;Q12968-6;Q12968-4;Q12968-3;Q12968-2	247;247;247;247;247;247	Q12968	Q12968	Nuclear factor of activated T-cells, cytoplasmic 3	NFATC3	GHSLSPRQSPCHSPRSSVTDENWLSPRPASG	sp|Q12968|NFAC3_HUMAN Nuclear factor of activated T-cells, cytoplasmic 3 OS=Homo sapiens OX=9606 GN=NFATC3 PE=1 SV=1;sp|Q12968-5|NFAC3_HUMAN Isoform 5 of Nuclear factor of activated T-cells, cytoplasmic 3 OS=Homo sapiens OX=9606 GN=NFATC3;sp|Q12968-6|NFAC3	1	2648	0	NaN	NaN	NaN	NaN	NaN	NaN	NaN	NaN	NaN	NaN	NaN	NaN	NaN	NaN	NaN	NaN	NaN
UID11352	S	3	___1	GYSDEIYVVPDDS(1)QNR	0.999895	0.000503454	69.122	56.355	66.644	-0.14111	74180000	1115	0.999895	0	NaN	0	NaN	0.999771	NaN	NaN	0	Q13017-2;Q13017	1115;1115	Q13017-2	Q13017-2	Rho GTPase-activating protein 5	ARHGAP5	KQKGYSDEIYVVPDDSQNRIKIRNSFVNNTQ	sp|Q13017-2|RHG05_HUMAN Isoform 2 of Rho GTPase-activating protein 5 OS=Homo sapiens OX=9606 GN=ARHGAP5;sp|Q13017|RHG05_HUMAN Rho GTPase-activating protein 5 OS=Homo sapiens OX=9606 GN=ARHGAP5 PE=1 SV=2	1	2656	0	NaN	NaN	NaN	NaN	NaN	NaN	NaN	NaN	NaN	NaN	NaN	NaN	NaN	NaN	NaN	NaN	NaN
UID11404	S	3	___1	MDEPS(1)PLAQPLELNQHSR	1	6.48e-05	78.324	65.124	78.324	-0.058338	91492000	5	NaN	NaN	NaN	NaN	0	1	NaN	0	NaN	Q13085;Q13085-4	5;42	Q13085	Q13085	Acetyl-CoA carboxylase 1;Biotin carboxylase	ACACA	___________MDEPSPLAQPLELNQHSRFI	sp|Q13085|ACACA_HUMAN Acetyl-CoA carboxylase 1 OS=Homo sapiens OX=9606 GN=ACACA PE=1 SV=2;sp|Q13085-4|ACACA_HUMAN Isoform 4 of Acetyl-CoA carboxylase 1 OS=Homo sapiens OX=9606 GN=ACACA	1	2667	0	NaN	NaN	NaN	NaN	NaN	NaN	NaN	NaN	NaN	NaN	NaN	NaN	NaN	NaN	NaN	NaN	NaN
UID11437	S	4	___1	KMDS(1)PGALQTNPPLK	0.999683	2.54e-05	109.66	79.222	109.66	0.18767	77520000	9	NaN	NaN	NaN	0	0.999683	0	NaN	NaN	NaN	Q13114;Q13114-2	9;9	Q13114	Q13114	TNF receptor-associated factor 3	TRAF3	_______MESSKKMDSPGALQTNPPLKLHTD	sp|Q13114|TRAF3_HUMAN TNF receptor-associated factor 3 OS=Homo sapiens OX=9606 GN=TRAF3 PE=1 SV=2;sp|Q13114-2|TRAF3_HUMAN Isoform 2 of TNF receptor-associated factor 3 OS=Homo sapiens OX=9606 GN=TRAF3	1	2675	0	NaN	NaN	NaN	NaN	NaN	NaN	NaN	NaN	NaN	NaN	NaN	NaN	NaN	NaN	NaN	NaN	NaN
UID11471	S	3	___1	GLAAGS(1)AETLPANFR	0.999959	6.6e-05	97.291	67.95	97.291	0.057517	27842000	1156	0.998428	NaN	NaN	NaN	NaN	0.999959	0.99926	NaN	0.995366	Q13136-2;Q13136	1156;1156	Q13136-2	Q13136-2	Liprin-alpha-1	PPFIA1	RKKFRPKDIRGLAAGSAETLPANFRVTSSMS	sp|Q13136-2|LIPA1_HUMAN Isoform 2 of Liprin-alpha-1 OS=Homo sapiens OX=9606 GN=PPFIA1;sp|Q13136|LIPA1_HUMAN Liprin-alpha-1 OS=Homo sapiens OX=9606 GN=PPFIA1 PE=1 SV=1	1	2682	0	NaN	NaN	NaN	NaN	NaN	NaN	NaN	NaN	NaN	NaN	NaN	NaN	NaN	NaN	NaN	NaN	NaN
UID11493	S	3	___1	KMDET(0.001)DAS(0.368)S(0.631)AVK	0.631121	0.000203599	86.488	66.935	86.488	-0.33051	128580000	92	0	NaN	NaN	NaN	0.631121	0	NaN	0	NaN	Q13148	92	Q13148	Q13148	TAR DNA-binding protein 43	TARDBP	YPKDNKRKMDETDASSAVKVKRAVQKTSDLI	sp|Q13148|TADBP_HUMAN TAR DNA-binding protein 43 OS=Homo sapiens OX=9606 GN=TARDBP PE=1 SV=1	1	2685	0	NaN	NaN	NaN	NaN	NaN	NaN	NaN	NaN	NaN	NaN	NaN	NaN	NaN	NaN	NaN	NaN	NaN
UID11532	S	4	___1	T(0.47)PS(0.528)DY(0.002)DLLIPPLGEDAFDALPPSLPPPPPPAR	0.527849	3.59e-09	77.531	73.087	77.531	-0.54618	41525000	800	NaN	0.381002	0.492757	NaN	0.527849	0	0.493823	NaN	0	Q13191	800	Q13191	Q13191	E3 ubiquitin-protein ligase CBL-B	CBLB	TRDNPKHGSSLNRTPSDYDLLIPPLGEDAFD	sp|Q13191|CBLB_HUMAN E3 ubiquitin-protein ligase CBL-B OS=Homo sapiens OX=9606 GN=CBLB PE=1 SV=2	1	2694	0	NaN	NaN	NaN	NaN	NaN	NaN	NaN	NaN	NaN	NaN	NaN	NaN	NaN	NaN	NaN	NaN	NaN
UID11537	S	2	___1	FGGS(0.5)GS(0.5)QVDSAR	0.5	8.55e-57	229.89	199.57	229.89	-0.47484	213850000	363	NaN	NaN	NaN	NaN	0.499916	0.5	NaN	NaN	NaN	Q13200;Q13200-2;Q13200-3	363;204;233	Q13200	Q13200	26S proteasome non-ATPase regulatory subunit 2	PSMD2	IYKTHLENNRFGGSGSQVDSARMNLASSFVN	sp|Q13200|PSMD2_HUMAN 26S proteasome non-ATPase regulatory subunit 2 OS=Homo sapiens OX=9606 GN=PSMD2 PE=1 SV=3;sp|Q13200-2|PSMD2_HUMAN Isoform 2 of 26S proteasome non-ATPase regulatory subunit 2 OS=Homo sapiens OX=9606 GN=PSMD2;sp|Q13200-3|PSMD2_HUMAN Iso	1	2695	0	NaN	NaN	NaN	NaN	NaN	NaN	NaN	NaN	NaN	NaN	NaN	NaN	NaN	NaN	NaN	NaN	NaN
UID11630	S	3	___1	TFSWAS(0.99)VT(0.005)S(0.005)K	0.989525	0.0012046	77.597	50.499	72.29	-0.20641	118950000	253	0.752662	0.961948	0.989525	0.950763	0.858165	0.975221	0.62824	NaN	NaN	Q13283	253	Q13283	Q13283	Ras GTPase-activating protein-binding protein 1	G3BP1	IAQTVQEDLRTFSWASVTSKNLPPSGAVPVT	sp|Q13283|G3BP1_HUMAN Ras GTPase-activating protein-binding protein 1 OS=Homo sapiens OX=9606 GN=G3BP1 PE=1 SV=1	1	2706	0	NaN	NaN	NaN	NaN	NaN	NaN	NaN	NaN	NaN	NaN	NaN	NaN	NaN	NaN	NaN	NaN	NaN
UID11745	S	3	___1	KAGT(0.01)AT(0.154)S(0.836)PAGS(0.603)S(0.397)PAVAGGTQR	0.602677	8.15e-21	142.2	126.21	78.128	0.55616	115570000	678	0.602677	0	NaN	NaN	0	0.565114	0	0	NaN	Q13428;Q13428-3;Q13428-4;Q13428-2;Q13428-8;Q13428-5;Q13428-6;Q13428-7	678;678;678;601;601;678;678;678	Q13428;Q13428-6	Q13428-6	Treacle protein	TCOF1	TQAPRKAGTATSPAGSSPAVAGGTQRPAEDS	sp|Q13428|TCOF_HUMAN Treacle protein OS=Homo sapiens OX=9606 GN=TCOF1 PE=1 SV=3;sp|Q13428-3|TCOF_HUMAN Isoform 3 of Treacle protein OS=Homo sapiens OX=9606 GN=TCOF1;sp|Q13428-4|TCOF_HUMAN Isoform 4 of Treacle protein OS=Homo sapiens OX=9606 GN=TCOF1;sp|Q13	1;2	2736;2737	0	NaN	NaN	NaN	NaN	NaN	NaN	NaN	NaN	NaN	NaN	NaN	NaN	NaN	NaN	NaN	NaN	NaN
UID11751	S	4	___1	GKGS(1)LGSQGAKDEPEEELQK	0.999928	3.38e-34	169.7	134.38	169.7	-0.42159	507250000	1369	0	0	0.998551	0	0	0.999928	0	NaN	0	Q13428;Q13428-3;Q13428-4;Q13428-2;Q13428-8;Q13428-6;Q13428-7	1407;1408;1443;1330;1331;1369;1370	Q13428;Q13428-6	Q13428-6	Treacle protein	TCOF1	RDKASGDVKEKKGKGSLGSQGAKDEPEEELQ	sp|Q13428|TCOF_HUMAN Treacle protein OS=Homo sapiens OX=9606 GN=TCOF1 PE=1 SV=3;sp|Q13428-3|TCOF_HUMAN Isoform 3 of Treacle protein OS=Homo sapiens OX=9606 GN=TCOF1;sp|Q13428-4|TCOF_HUMAN Isoform 4 of Treacle protein OS=Homo sapiens OX=9606 GN=TCOF1;sp|Q13	1	2736;2737	0	NaN	NaN	NaN	NaN	NaN	NaN	NaN	NaN	NaN	NaN	NaN	NaN	NaN	NaN	NaN	NaN	NaN
UID11828	S	3	___1	VS(0.755)S(0.237)QGNLIPARPAPAPPLY(0.002)S(0.002)S(0.002)LT(0.001)	0.754789	0.0082304	51.321	9.9206	47.919	1.9407	45584000	798	0	0.754789	NaN	0	0.525635	0	0	NaN	0	Q13443	798	Q13443	Q13443	Disintegrin and metalloproteinase domain-containing protein 9	ADAM9	PQQFPSRPPPPQPKVSSQGNLIPARPAPAPP	sp|Q13443|ADAM9_HUMAN Disintegrin and metalloproteinase domain-containing protein 9 OS=Homo sapiens OX=9606 GN=ADAM9 PE=1 SV=1	1	2743	0	NaN	NaN	NaN	NaN	NaN	NaN	NaN	NaN	NaN	NaN	NaN	NaN	NaN	NaN	NaN	NaN	NaN
UID11898	S	3	___1	S(1)PVETCSIPR	0.999986	0.00109192	84.479	44.77	70.089	0.1465	235880000	355	0.999235	0	0.999986	0.9994	0.999824	NaN	NaN	0	NaN	Q13480-2;Q13480	355;355	Q13480-2	Q13480-2	GRB2-associated-binding protein 1	GAB1	IPPPRPPKPHPAHDRSPVETCSIPRTASDTD	sp|Q13480-2|GAB1_HUMAN Isoform 2 of GRB2-associated-binding protein 1 OS=Homo sapiens OX=9606 GN=GAB1;sp|Q13480|GAB1_HUMAN GRB2-associated-binding protein 1 OS=Homo sapiens OX=9606 GN=GAB1 PE=1 SV=2	1	2752	0	NaN	NaN	NaN	NaN	NaN	NaN	NaN	NaN	NaN	NaN	NaN	NaN	NaN	NaN	NaN	NaN	NaN
UID11925	S	3	___1	PGPTAESASGPSEDPS(1)VNFLK	0.999999	5.37e-36	162.81	142.15	162.81	0.0095312	154950000	233	0	NaN	NaN	NaN	0.999999	NaN	NaN	NaN	NaN	Q13501;Q13501-2	233;149	Q13501	Q13501	Sequestosome-1	SQSTM1	PGPTAESASGPSEDPSVNFLKNVGESVAAAL	sp|Q13501|SQSTM_HUMAN Sequestosome-1 OS=Homo sapiens OX=9606 GN=SQSTM1 PE=1 SV=1;sp|Q13501-2|SQSTM_HUMAN Isoform 2 of Sequestosome-1 OS=Homo sapiens OX=9606 GN=SQSTM1	1	2759	0	NaN	NaN	NaN	NaN	NaN	NaN	NaN	NaN	NaN	NaN	NaN	NaN	NaN	NaN	NaN	NaN	NaN
UID11947	S	4	___1	S(0.003)S(0.003)S(0.003)QPS(0.024)S(0.077)CCS(0.798)DPS(0.087)KPGGNVEGAT(0.004)QS(0.001)LAEQMR	0.797557	7.15e-26	117.15	99.698	46.128	-0.30055	695030000	291	0.641786	0.62879	NaN	0	0.797557	0.290142	0.531049	0.465064	0	Q13501;Q13501-2	291;207	Q13501	Q13501	Sequestosome-1	SQSTM1	SSTEEKSSSQPSSCCSDPSKPGGNVEGATQS	sp|Q13501|SQSTM_HUMAN Sequestosome-1 OS=Homo sapiens OX=9606 GN=SQSTM1 PE=1 SV=1;sp|Q13501-2|SQSTM_HUMAN Isoform 2 of Sequestosome-1 OS=Homo sapiens OX=9606 GN=SQSTM1	1;2;3	2759	0	NaN	NaN	NaN	NaN	NaN	NaN	NaN	NaN	NaN	NaN	NaN	NaN	NaN	NaN	NaN	NaN	NaN
UID11951	S	2	___1	S(1)PEPAAPSGVR	0.999998	0.000457636	94.191	70.763	94.191	-0.090959	104260000	43	NaN	NaN	0	NaN	NaN	0.999998	NaN	NaN	0.999748	Q13505-2;Q13505	43;43	Q13505-2	Q13505-2	Metaxin-1	MTX1	FGKSPQTWPRRTRPRSPEPAAPSGVRGSTWT	sp|Q13505-2|MTX1_HUMAN Isoform 2 of Metaxin-1 OS=Homo sapiens OX=9606 GN=MTX1;sp|Q13505|MTX1_HUMAN Metaxin-1 OS=Homo sapiens OX=9606 GN=MTX1 PE=1 SV=3	1	2760	0	NaN	NaN	NaN	NaN	NaN	NaN	NaN	NaN	NaN	NaN	NaN	NaN	NaN	NaN	NaN	NaN	NaN
UID11959	S	3	___1	DAS(1)PINRWS(1)PTR	0.999653	3.11e-17	168.08	150.59	137.89	0.0061142	13167000000	437	0.973258	0.990008	0.999653	0.995802	0.994362	0.997099	0.998268	0.998453	0.979036	Q13523	437	Q13523	Q13523	Serine/threonine-protein kinase PRP4 homolog	PRPF4B	SRRERSKDASPINRWSPTRRRSRSPIRRRSR	sp|Q13523|PRP4B_HUMAN Serine/threonine-protein kinase PRP4 homolog OS=Homo sapiens OX=9606 GN=PRPF4B PE=1 SV=3	1;2;3	2763	0	NaN	NaN	NaN	NaN	NaN	NaN	NaN	NaN	NaN	NaN	NaN	NaN	NaN	NaN	NaN	NaN	NaN
UID11970	S	4	___1	KS(1)KS(0.004)PT(0.996)LR	0.999988	0.00629413	88.021	65.993	88.021	-0.060961	23619000000	239	0.998899	0.992724	0.999988	0.999184	0.995546	0.934458	0.995999	0.992091	0.998524	Q13523	239	Q13523	Q13523	Serine/threonine-protein kinase PRP4 homolog	PRPF4B	KSPSKRSKSQDQARKSKSPTLRRRSQEKIGK	sp|Q13523|PRP4B_HUMAN Serine/threonine-protein kinase PRP4 homolog OS=Homo sapiens OX=9606 GN=PRPF4B PE=1 SV=3	1;2	2763	0	NaN	NaN	NaN	NaN	NaN	NaN	NaN	NaN	NaN	NaN	NaN	NaN	NaN	NaN	NaN	NaN	NaN
UID11987	S	3	___1	RLS(0.348)S(0.141)S(0.511)LNPSK	0.510883	0.000168085	104.17	82.503	104.17	-0.19246	1159900000	437	0.397687	NaN	NaN	0.418679	0.510883	0.426882	NaN	NaN	NaN	Q13535;Q13535-3;Q13535-2	437;437;437	Q13535	Q13535	Serine/threonine-protein kinase ATR	ATR	SNSDGISPKRRRLSSSLNPSKRAPKQTEEIK	sp|Q13535|ATR_HUMAN Serine/threonine-protein kinase ATR OS=Homo sapiens OX=9606 GN=ATR PE=1 SV=3;sp|Q13535-3|ATR_HUMAN Isoform 3 of Serine/threonine-protein kinase ATR OS=Homo sapiens OX=9606 GN=ATR;sp|Q13535-2|ATR_HUMAN Isoform 2 of Serine/threonine-prote	1	2765	0	NaN	NaN	NaN	NaN	NaN	NaN	NaN	NaN	NaN	NaN	NaN	NaN	NaN	NaN	NaN	NaN	NaN
UID12004	S	3	___1	MQS(1)LQLDCVAVPS(0.624)S(0.376)R	0.623551	0.000267536	82.189	70.043	78.428	0.30349	91719000	284	0.552951	NaN	NaN	NaN	NaN	0.620959	NaN	0	0.623551	Q13546-2;Q13546	284;330	Q13546-2	Q13546-2	Receptor-interacting serine/threonine-protein kinase 1	RIPK1	VKRMQSLQLDCVAVPSSRSNSATEQPGSLHS	sp|Q13546-2|RIPK1_HUMAN Isoform 2 of Receptor-interacting serine/threonine-protein kinase 1 OS=Homo sapiens OX=9606 GN=RIPK1;sp|Q13546|RIPK1_HUMAN Receptor-interacting serine/threonine-protein kinase 1 OS=Homo sapiens OX=9606 GN=RIPK1 PE=1 SV=3	1;2	2768	0	NaN	NaN	NaN	NaN	NaN	NaN	NaN	NaN	NaN	NaN	NaN	NaN	NaN	NaN	NaN	NaN	NaN
UID12006	S	5	___1	RVS(1)HDPFAQQRPYENFQNTEGK	0.999996	3.06e-16	133.4	107.99	133.4	0.23458	589830000	370	0	NaN	NaN	NaN	NaN	0.996152	0	0	0.999996	Q13546-2;Q13546	370;416	Q13546-2	Q13546-2	Receptor-interacting serine/threonine-protein kinase 1	RIPK1	QNVAYNREEERRRRVSHDPFAQQRPYENFQN	sp|Q13546-2|RIPK1_HUMAN Isoform 2 of Receptor-interacting serine/threonine-protein kinase 1 OS=Homo sapiens OX=9606 GN=RIPK1;sp|Q13546|RIPK1_HUMAN Receptor-interacting serine/threonine-protein kinase 1 OS=Homo sapiens OX=9606 GN=RIPK1 PE=1 SV=3	1	2768	0	NaN	NaN	NaN	NaN	NaN	NaN	NaN	NaN	NaN	NaN	NaN	NaN	NaN	NaN	NaN	NaN	NaN
UID12034	S	3	___1	T(0.022)GYES(0.978)GEYEMLGEGLGVK	0.977628	2.27e-08	127.17	107.85	127.17	0.21249	104970000	83	NaN	NaN	0.823822	NaN	NaN	0.977628	NaN	NaN	NaN	Q13561;Q13561-3;Q13561-2	83;85;88	Q13561	Q13561	Dynactin subunit 2	DCTN2	DFSDRIGKTKRTGYESGEYEMLGEGLGVKET	sp|Q13561|DCTN2_HUMAN Dynactin subunit 2 OS=Homo sapiens OX=9606 GN=DCTN2 PE=1 SV=4;sp|Q13561-3|DCTN2_HUMAN Isoform 3 of Dynactin subunit 2 OS=Homo sapiens OX=9606 GN=DCTN2;sp|Q13561-2|DCTN2_HUMAN Isoform 2 of Dynactin subunit 2 OS=Homo sapiens OX=9606 GN=	1	2775	0	NaN	NaN	NaN	NaN	NaN	NaN	NaN	NaN	NaN	NaN	NaN	NaN	NaN	NaN	NaN	NaN	NaN
UID12041	S	3	___1	GPPS(1)PPAPVMHS(0.994)PS(0.006)R	0.994364	2.35e-24	157.7	146.85	137.23	-0.34451	63894000000	232	0.988377	0.993652	0.979834	0.973322	0.980825	0.961932	0.973173	0.979725	0.994364	Q13573	232	Q13573	Q13573	SNW domain-containing protein 1	SNW1	KIPRGPPSPPAPVMHSPSRKMTVKEQQEWKI	sp|Q13573|SNW1_HUMAN SNW domain-containing protein 1 OS=Homo sapiens OX=9606 GN=SNW1 PE=1 SV=1	1;2	2779	0	NaN	NaN	NaN	NaN	NaN	NaN	NaN	NaN	NaN	NaN	NaN	NaN	NaN	NaN	NaN	NaN	NaN
UID12109	S	3	___1	MFPTGFSS(0.004)PS(0.985)PS(0.011)AAAAAQEVR	0.984965	1.29e-08	94.594	72.38	94.594	-0.39898	68608000	10	NaN	NaN	NaN	0.92144	NaN	0.984965	NaN	NaN	0.916503	Q13620-1	10	Q13620-1	Q13620-1	Cullin-4B	CUL4B	______MFPTGFSSPSPSAAAAAQEVRSATD	sp|Q13620-1|CUL4B_HUMAN Isoform 2 of Cullin-4B OS=Homo sapiens OX=9606 GN=CUL4B	1	2794	0	NaN	NaN	NaN	NaN	NaN	NaN	NaN	NaN	NaN	NaN	NaN	NaN	NaN	NaN	NaN	NaN	NaN
UID12142	S	3	___1	ANEPCT(0.184)S(0.816)FAECVCDENCEK	0.816386	1.85e-07	108.08	97.741	108.08	1.309	62261000	412	0.816386	NaN	NaN	NaN	NaN	0.811752	0	NaN	NaN	Q13772;Q13772-3;Q13772-4	412;428;428	Q13772	Q13772	Nuclear receptor coactivator 4	NCOA4	PCKVEEVCRANEPCTSFAECVCDENCEKEAL	sp|Q13772|NCOA4_HUMAN Nuclear receptor coactivator 4 OS=Homo sapiens OX=9606 GN=NCOA4 PE=1 SV=1;sp|Q13772-3|NCOA4_HUMAN Isoform 3 of Nuclear receptor coactivator 4 OS=Homo sapiens OX=9606 GN=NCOA4;sp|Q13772-4|NCOA4_HUMAN Isoform 4 of Nuclear receptor coact	1	2800	0	NaN	NaN	NaN	NaN	NaN	NaN	NaN	NaN	NaN	NaN	NaN	NaN	NaN	NaN	NaN	NaN	NaN
UID12149	S	2	___1	AQS(1)PGS(1)PLHAR	1	5.46e-05	104.9	93.191	104.08	-0.0089215	978080000	1036	1	1	1	1	1	1	1	1	1	Q13796	1036	Q13796	Q13796	Protein Shroom2	SHROOM2	YSEESTPADLGPRAQSPGSPLHARGQDSWPV	sp|Q13796|SHRM2_HUMAN Protein Shroom2 OS=Homo sapiens OX=9606 GN=SHROOM2 PE=1 SV=1	1;2	2801	0	NaN	NaN	NaN	NaN	NaN	NaN	NaN	NaN	NaN	NaN	NaN	NaN	NaN	NaN	NaN	NaN	NaN
UID12156	S	2	___1	LQAS(0.001)LS(0.254)S(0.661)S(0.084)DVR	0.660577	7.38e-11	158.86	142.08	115.05	0.12528	162720000	414	NaN	0	0	NaN	NaN	0.660577	0	NaN	0	Q13796	414	Q13796	Q13796	Protein Shroom2	SHROOM2	PSKDGASSRLQASLSSSDVRFPQSPHSGRHP	sp|Q13796|SHRM2_HUMAN Protein Shroom2 OS=Homo sapiens OX=9606 GN=SHROOM2 PE=1 SV=1	1	2801	0	NaN	NaN	NaN	NaN	NaN	NaN	NaN	NaN	NaN	NaN	NaN	NaN	NaN	NaN	NaN	NaN	NaN
UID12169	S	2	___1	VNS(1)LGETAER	0.999964	0.0025383	66.989	51.907	66.989	0.21195	99086000	1291	NaN	NaN	NaN	NaN	0.993598	0.999964	0	0	NaN	Q13813-2;Q13813;Q13813-3	1291;1291;1271	Q13813-2	Q13813-2	Spectrin alpha chain, non-erythrocytic 1	SPTAN1	EGFERDLAALGDKVNSLGETAERLIQSHPES	sp|Q13813-2|SPTN1_HUMAN Isoform 2 of Spectrin alpha chain, non-erythrocytic 1 OS=Homo sapiens OX=9606 GN=SPTAN1;sp|Q13813|SPTN1_HUMAN Spectrin alpha chain, non-erythrocytic 1 OS=Homo sapiens OX=9606 GN=SPTAN1 PE=1 SV=3;sp|Q13813-3|SPTN1_HUMAN Isoform 3 of	1	2802	0	NaN	NaN	NaN	NaN	NaN	NaN	NaN	NaN	NaN	NaN	NaN	NaN	NaN	NaN	NaN	NaN	NaN
UID12200	S	3	___1	LQPHPQLS(1)PEIR	1	0.000228963	87.088	65.837	48.59	-0.08505	303700000	414	0	1	NaN	1	1	1	0	1	1	Q13895	414	Q13895	Q13895	Bystin	BYSL	EALLELLRLQPHPQLSPEIRRELQSAVPRDV	sp|Q13895|BYST_HUMAN Bystin OS=Homo sapiens OX=9606 GN=BYSL PE=1 SV=3	1	2812	0	NaN	NaN	NaN	NaN	NaN	NaN	NaN	NaN	NaN	NaN	NaN	NaN	NaN	NaN	NaN	NaN	NaN
UID12268	S	3	___1	NLGIPIITVLGDS(1)K	0.999999	4.88e-08	120.9	93.035	120.9	0.30105	18780000	953	0.919056	NaN	0.971477	NaN	0.997029	0.999583	0	0	0.999999	Q14008-2;Q14008;Q14008-3	953;953;953	Q14008-2	Q14008-2	Cytoskeleton-associated protein 5	CKAP5	HVKNLGIPIITVLGDSKNNVRAAALATVNAW	sp|Q14008-2|CKAP5_HUMAN Isoform 2 of Cytoskeleton-associated protein 5 OS=Homo sapiens OX=9606 GN=CKAP5;sp|Q14008|CKAP5_HUMAN Cytoskeleton-associated protein 5 OS=Homo sapiens OX=9606 GN=CKAP5 PE=1 SV=3;sp|Q14008-3|CKAP5_HUMAN Isoform 3 of Cytoskeleton-ass	1	2823	0	NaN	NaN	NaN	NaN	NaN	NaN	NaN	NaN	NaN	NaN	NaN	NaN	NaN	NaN	NaN	NaN	NaN
UID12287	S	4	___1	SSFNPDAQVFVPIGS(0.024)QDS(0.024)S(0.024)LS(0.024)NS(0.124)PS(0.646)PS(0.124)FGQS(0.007)PS(0.002)PTFIPR	0.645743	1.01e-32	109.84	101.88	97.003	0.44294	97448000	155	0.176642	0.237086	0.627705	0.319248	0.16205	0.645743	0.46712	0.420637	0.191685	Q14106-2;Q14106	155;155	Q14106-2	Q14106-2	Protein Tob2	TOB2	FVPIGSQDSSLSNSPSPSFGQSPSPTFIPRS	sp|Q14106-2|TOB2_HUMAN Isoform 2 of Protein Tob2 OS=Homo sapiens OX=9606 GN=TOB2;sp|Q14106|TOB2_HUMAN Protein Tob2 OS=Homo sapiens OX=9606 GN=TOB2 PE=1 SV=2	1;2	2829	0	NaN	NaN	NaN	NaN	NaN	NaN	NaN	NaN	NaN	NaN	NaN	NaN	NaN	NaN	NaN	NaN	NaN
UID12387	S	4	___1	IGPPS(0.536)S(0.449)PS(0.012)AT(0.003)DKEENPAVLAENCFR	0.535875	1.13e-18	125.59	99.314	125.59	-1.2225	108900000	219	0.486951	NaN	NaN	0.417096	0.52752	0.535875	NaN	NaN	NaN	Q14156-3;Q14156-2;Q14156	219;183;219	Q14156-3	Q14156-3	Protein EFR3 homolog A	EFR3A	NMQKIEEVDSRIGPPSSPSATDKEENPAVLA	sp|Q14156-3|EFR3A_HUMAN Isoform 3 of Protein EFR3 homolog A OS=Homo sapiens OX=9606 GN=EFR3A;sp|Q14156-2|EFR3A_HUMAN Isoform 2 of Protein EFR3 homolog A OS=Homo sapiens OX=9606 GN=EFR3A;sp|Q14156|EFR3A_HUMAN Protein EFR3 homolog A OS=Homo sapiens OX=9606 G	1	2845	0	NaN	NaN	NaN	NaN	NaN	NaN	NaN	NaN	NaN	NaN	NaN	NaN	NaN	NaN	NaN	NaN	NaN
UID12454	S	3	___1	S(0.002)LPAS(0.091)LS(0.907)FLVK	0.907129	0.0138633	53.967	30.591	53.967	0.9954	1373500	171	NaN	NaN	NaN	NaN	0.907129	NaN	NaN	NaN	NaN	Q14160;Q14160-2;Q14160-3	171;90;171	Q14160;Q14160-3	Q14160	Protein scribble homolog	SCRIB	LELRENLLKSLPASLSFLVKLEQLDLGGNDL	sp|Q14160|SCRIB_HUMAN Protein scribble homolog OS=Homo sapiens OX=9606 GN=SCRIB PE=1 SV=4;sp|Q14160-2|SCRIB_HUMAN Isoform 2 of Protein scribble homolog OS=Homo sapiens OX=9606 GN=SCRIB;sp|Q14160-3|SCRIB_HUMAN Isoform 3 of Protein scribble homolog OS=Homo s	1	2848;2849	0	NaN	NaN	NaN	NaN	NaN	NaN	NaN	NaN	NaN	NaN	NaN	NaN	NaN	NaN	NaN	NaN	NaN
UID12473	S	3	___1	RLS(1)LDLSELAK	0.999977	1e-12	170.77	82.694	137.27	0.053415	136700000	258	0.999944	0.990479	NaN	0.999333	0.998055	NaN	0.999504	0.999977	0	Q14161-10	258	Q14161-10	Q14161-10	ARF GTPase-activating protein GIT2	GIT2	NGQHFIIPQMADRRLSLDLSELAKAAKKKLQ	sp|Q14161-10|GIT2_HUMAN Isoform 10 of ARF GTPase-activating protein GIT2 OS=Homo sapiens OX=9606 GN=GIT2	1	2851	0	NaN	NaN	NaN	NaN	NaN	NaN	NaN	NaN	NaN	NaN	NaN	NaN	NaN	NaN	NaN	NaN	NaN
UID12527	S	3	___1	S(0.397)PS(0.603)AQLMEQVAQLK	0.603354	4.14e-25	164.82	126.45	164.82	-0.34232	62481000	1140	0.603354	NaN	0.534368	NaN	NaN	0.602511	NaN	NaN	0	Q14203-3;Q14203-4;Q14203-6;Q14203;Q14203-5;Q14203-2	1140;1157;1175;1182;1043;1048	Q14203-3	Q14203-3	Dynactin subunit 1	DCTN1	HVVDITRTSPAAKSPSAQLMEQVAQLKSLSD	sp|Q14203-3|DCTN1_HUMAN Isoform 3 of Dynactin subunit 1 OS=Homo sapiens OX=9606 GN=DCTN1;sp|Q14203-4|DCTN1_HUMAN Isoform 4 of Dynactin subunit 1 OS=Homo sapiens OX=9606 GN=DCTN1;sp|Q14203-6|DCTN1_HUMAN Isoform 6 of Dynactin subunit 1 OS=Homo sapiens OX=960	1	2868	0	NaN	NaN	NaN	NaN	NaN	NaN	NaN	NaN	NaN	NaN	NaN	NaN	NaN	NaN	NaN	NaN	NaN
UID12531	S	2	___1	TDS(0.081)T(0.167)S(0.751)DGRPAWMR	0.7509	1.57e-07	119.79	100.59	94.507	-0.33747	45272000	4370	0	0	0	0	0	0.7509	NaN	0.41696	0	Q14204	4370	Q14204	Q14204	Cytoplasmic dynein 1 heavy chain 1	DYNC1H1	LAYAETEKKTRTDSTSDGRPAWMRTLHTTAS	sp|Q14204|DYHC1_HUMAN Cytoplasmic dynein 1 heavy chain 1 OS=Homo sapiens OX=9606 GN=DYNC1H1 PE=1 SV=5	1	2869	0	NaN	NaN	NaN	NaN	NaN	NaN	NaN	NaN	NaN	NaN	NaN	NaN	NaN	NaN	NaN	NaN	NaN
UID12575	S	2	___1	GS(0.004)S(0.136)YS(0.838)S(0.023)IPK	0.837995	0.00105646	109.29	78.72	109.29	-0.24365	70298000	2593	NaN	NaN	0	NaN	0.837995	NaN	NaN	NaN	NaN	Q14315-2;Q14315	2593;2626	Q14315-2	Q14315-2	Filamin-C	FLNC	VETVTKSSSSRGSSYSSIPKFSSDASKVVTR	sp|Q14315-2|FLNC_HUMAN Isoform 2 of Filamin-C OS=Homo sapiens OX=9606 GN=FLNC;sp|Q14315|FLNC_HUMAN Filamin-C OS=Homo sapiens OX=9606 GN=FLNC PE=1 SV=3	1	2878	0	NaN	NaN	NaN	NaN	NaN	NaN	NaN	NaN	NaN	NaN	NaN	NaN	NaN	NaN	NaN	NaN	NaN
UID12592	S	3	___1	NS(0.006)S(0.143)S(0.849)PVAAT(0.001)PASVNTTPDKPK	0.849498	1.15e-20	141.5	120.85	108.44	0.24479	102330000	12	NaN	NaN	NaN	NaN	0.849498	0.467557	NaN	0	NaN	Q14469	12	Q14469	Q14469	Transcription factor HES-1	HES1	____MPADIMEKNSSSPVAATPASVNTTPDK	sp|Q14469|HES1_HUMAN Transcription factor HES-1 OS=Homo sapiens OX=9606 GN=HES1 PE=1 SV=1	1	2884	0	NaN	NaN	NaN	NaN	NaN	NaN	NaN	NaN	NaN	NaN	NaN	NaN	NaN	NaN	NaN	NaN	NaN
UID12599	S	3	___1	Y(0.038)RS(0.962)PYS(1)GPK	0.999664	0.00250244	78.814	56.011	77.185	-0.16675	1095900000	100	0.996865	0.994336	0.982393	0.992452	0.987108	0.98934	0.996937	0.999664	0.988257	Q14498-2;Q14498	100;100	Q14498-2	Q14498-2	RNA-binding protein 39	RBM39	RSRDRRFRGRYRSPYSGPKFNSAIRGKIGLP	sp|Q14498-2|RBM39_HUMAN Isoform 2 of RNA-binding protein 39 OS=Homo sapiens OX=9606 GN=RBM39;sp|Q14498|RBM39_HUMAN RNA-binding protein 39 OS=Homo sapiens OX=9606 GN=RBM39 PE=1 SV=2	1;2	2886	0	NaN	NaN	NaN	NaN	NaN	NaN	NaN	NaN	NaN	NaN	NaN	NaN	NaN	NaN	NaN	NaN	NaN
UID12642	S	4	___1	EVS(0.999)DDET(0.001)EEKEDKEEEK	0.998958	0.00239072	63.606	42.139	63.606	-2.1354	156010000	231	NaN	NaN	NaN	NaN	NaN	0.998958	NaN	NaN	NaN	Q14568	231	Q14568	Q14568	Heat shock protein HSP 90-alpha A2	HSP90AA2P	YPITLFVEKECDKEVSDDETEEKEDKEEEKE	sp|Q14568|HS902_HUMAN Heat shock protein HSP 90-alpha A2 OS=Homo sapiens OX=9606 GN=HSP90AA2P PE=1 SV=2	1	2898	0	NaN	NaN	NaN	NaN	NaN	NaN	NaN	NaN	NaN	NaN	NaN	NaN	NaN	NaN	NaN	NaN	NaN
UID12712	S	3	___1	S(0.787)ES(0.213)GGLGVSMVEYVLSSSPGDSCLR	0.787158	1.16e-21	131.97	120.53	131.97	0.33166	37334000	212	0	NaN	NaN	NaN	0	0.77661	0.787158	NaN	0	Q14671-2;Q14671;Q14671-3	212;212;212	Q14671-2	Q14671-2	Pumilio homolog 1	PUM1	SFHVNSEVNSVLSPRSESGGLGVSMVEYVLS	sp|Q14671-2|PUM1_HUMAN Isoform 2 of Pumilio homolog 1 OS=Homo sapiens OX=9606 GN=PUM1;sp|Q14671|PUM1_HUMAN Pumilio homolog 1 OS=Homo sapiens OX=9606 GN=PUM1 PE=1 SV=3;sp|Q14671-3|PUM1_HUMAN Isoform 3 of Pumilio homolog 1 OS=Homo sapiens OX=9606 GN=PUM1	1	2911	0	NaN	NaN	NaN	NaN	NaN	NaN	NaN	NaN	NaN	NaN	NaN	NaN	NaN	NaN	NaN	NaN	NaN
UID12723	S	4	___1	AMPVPT(0.092)T(0.083)PEFQS(0.597)PVT(0.112)T(0.112)DQPIS(0.004)PEPITQPSCIK	0.597042	6.41e-11	77.984	67.081	77.065	0.39322	80858000	1702	0.227578	0.218997	0	0.27134	0.165834	0.597042	NaN	NaN	NaN	Q14676;Q14676-2;Q14676-3	1702;1438;1415	Q14676	Q14676	Mediator of DNA damage checkpoint protein 1	MDC1	STVRAMPVPTTPEFQSPVTTDQPISPEPITQ	sp|Q14676|MDC1_HUMAN Mediator of DNA damage checkpoint protein 1 OS=Homo sapiens OX=9606 GN=MDC1 PE=1 SV=3;sp|Q14676-2|MDC1_HUMAN Isoform 2 of Mediator of DNA damage checkpoint protein 1 OS=Homo sapiens OX=9606 GN=MDC1;sp|Q14676-3|MDC1_HUMAN Isoform 3 of M	1	2913	0	NaN	NaN	NaN	NaN	NaN	NaN	NaN	NaN	NaN	NaN	NaN	NaN	NaN	NaN	NaN	NaN	NaN
UID12745	S	3	___1	HQVS(0.999)VEGT(0.001)NQTDVK	0.999044	0.000214951	83.894	54.566	83.758	-0.84368	51269000	544	0	NaN	NaN	NaN	0.999044	0.997711	NaN	NaN	NaN	Q14676;Q14676-2;Q14676-3;Q14676-4	544;544;544;544	Q14676	Q14676	Mediator of DNA damage checkpoint protein 1	MDC1	VPPGSAIIHIKKHQVSVEGTNQTDVKAVGGP	sp|Q14676|MDC1_HUMAN Mediator of DNA damage checkpoint protein 1 OS=Homo sapiens OX=9606 GN=MDC1 PE=1 SV=3;sp|Q14676-2|MDC1_HUMAN Isoform 2 of Mediator of DNA damage checkpoint protein 1 OS=Homo sapiens OX=9606 GN=MDC1;sp|Q14676-3|MDC1_HUMAN Isoform 3 of M	1	2913	0	NaN	NaN	NaN	NaN	NaN	NaN	NaN	NaN	NaN	NaN	NaN	NaN	NaN	NaN	NaN	NaN	NaN
UID12746	S	4	___1	KS(1)QLPAEGDAGAEWAAAVLK	1	1.37e-07	98.816	79.438	98.816	0.15791	23105000	598	NaN	NaN	NaN	NaN	NaN	1	NaN	NaN	0	Q14676;Q14676-2;Q14676-3;Q14676-4	598;598;598;598	Q14676	Q14676	Mediator of DNA damage checkpoint protein 1	MDC1	EGTSLTASVVADVRKSQLPAEGDAGAEWAAA	sp|Q14676|MDC1_HUMAN Mediator of DNA damage checkpoint protein 1 OS=Homo sapiens OX=9606 GN=MDC1 PE=1 SV=3;sp|Q14676-2|MDC1_HUMAN Isoform 2 of Mediator of DNA damage checkpoint protein 1 OS=Homo sapiens OX=9606 GN=MDC1;sp|Q14676-3|MDC1_HUMAN Isoform 3 of M	1	2913	0	NaN	NaN	NaN	NaN	NaN	NaN	NaN	NaN	NaN	NaN	NaN	NaN	NaN	NaN	NaN	NaN	NaN
UID12799	S	2	___1	MEEES(0.5)QS(0.5)QGR	0.5	0.00164924	78.692	55.466	78.692	0.53396	8978400	358	NaN	NaN	NaN	NaN	NaN	0.5	NaN	NaN	0	Q14683	358	Q14683	Q14683	Structural maintenance of chromosomes protein 1A	SMC1A	VEKARQEFEERMEEESQSQGRDLTLEENQVK	sp|Q14683|SMC1A_HUMAN Structural maintenance of chromosomes protein 1A OS=Homo sapiens OX=9606 GN=SMC1A PE=1 SV=2	1	2918	0	NaN	NaN	NaN	NaN	NaN	NaN	NaN	NaN	NaN	NaN	NaN	NaN	NaN	NaN	NaN	NaN	NaN
UID12822	S	5	___1	ASLPQAATFGELS(0.612)GPLKPGS(0.388)PYRPPVPR	0.612001	1.13e-69	189.66	166.67	189.66	-0.086171	82954000	703	NaN	NaN	NaN	NaN	0.612001	NaN	NaN	NaN	0	Q14687;Q14687-2;Q14687-3	703;599;630	Q14687	Q14687	Genetic suppressor element 1	GSE1	QQRASLPQAATFGELSGPLKPGSPYRPPVPR	sp|Q14687|GSE1_HUMAN Genetic suppressor element 1 OS=Homo sapiens OX=9606 GN=GSE1 PE=1 SV=3;sp|Q14687-2|GSE1_HUMAN Isoform 2 of Genetic suppressor element 1 OS=Homo sapiens OX=9606 GN=GSE1;sp|Q14687-3|GSE1_HUMAN Isoform 3 of Genetic suppressor element 1 OS	1	2921	0	NaN	NaN	NaN	NaN	NaN	NaN	NaN	NaN	NaN	NaN	NaN	NaN	NaN	NaN	NaN	NaN	NaN
UID12841	S	3	___1	T(0.418)S(0.582)IIEAQYLR	0.58165	0.00019611	100.93	58.332	100.93	0.11345	27443000	438	0	0.576961	NaN	NaN	NaN	0.58165	NaN	0.563824	NaN	Q14690	438	Q14690	Q14690	Protein RRP5 homolog	PDCD11	DYSQMDELALLSLRTSIIEAQYLRYHDIEPG	sp|Q14690|RRP5_HUMAN Protein RRP5 homolog OS=Homo sapiens OX=9606 GN=PDCD11 PE=1 SV=3	1	2923	0	NaN	NaN	NaN	NaN	NaN	NaN	NaN	NaN	NaN	NaN	NaN	NaN	NaN	NaN	NaN	NaN	NaN
UID12850	S	3	___1	S(0.004)ANQS(0.949)PQS(0.045)VGS(0.001)SGVDSGVESTSDGLR	0.949255	5.15e-16	106.49	89.998	106.49	1.1187	15401000	438	NaN	NaN	NaN	NaN	NaN	0.949255	NaN	NaN	NaN	Q14693;Q14693-2;Q14693-4;Q14693-3;Q14693-5;Q14693-7	438;444;438;474;480;523	Q14693	Q14693	Phosphatidate phosphatase LPIN1	LPIN1	LAKHASDNGARSANQSPQSVGSSGVDSGVES	sp|Q14693|LPIN1_HUMAN Phosphatidate phosphatase LPIN1 OS=Homo sapiens OX=9606 GN=LPIN1 PE=1 SV=2;sp|Q14693-2|LPIN1_HUMAN Isoform 2 of Phosphatidate phosphatase LPIN1 OS=Homo sapiens OX=9606 GN=LPIN1;sp|Q14693-4|LPIN1_HUMAN Isoform 4 of Phosphatidate phosph	1	2925	0	NaN	NaN	NaN	NaN	NaN	NaN	NaN	NaN	NaN	NaN	NaN	NaN	NaN	NaN	NaN	NaN	NaN
UID12901	S	4	___1	GALLLS(0.554)S(0.446)IELEELKAENEK	0.553683	1.77e-12	131.18	113.36	131.18	0.20068	12791000	490	NaN	NaN	NaN	NaN	0.553683	NaN	NaN	NaN	NaN	Q14789;Q14789-2;Q14789-4;Q14789-3	490;495;415;456	Q14789	Q14789	Golgin subfamily B member 1	GOLGB1	KRVVELENEKGALLLSSIELEELKAENEKLS	sp|Q14789|GOGB1_HUMAN Golgin subfamily B member 1 OS=Homo sapiens OX=9606 GN=GOLGB1 PE=1 SV=2;sp|Q14789-2|GOGB1_HUMAN Isoform 2 of Golgin subfamily B member 1 OS=Homo sapiens OX=9606 GN=GOLGB1;sp|Q14789-4|GOGB1_HUMAN Isoform 4 of Golgin subfamily B member	1	2936	0	NaN	NaN	NaN	NaN	NaN	NaN	NaN	NaN	NaN	NaN	NaN	NaN	NaN	NaN	NaN	NaN	NaN
UID12929	S	3	___1	GWGSPPLTT(0.002)QLS(0.915)PT(0.082)GAK	0.914754	0.00144515	65.097	49.676	65.097	-0.3435	67816000	81	NaN	NaN	NaN	NaN	NaN	0.914754	0	NaN	0.908273	Q14802-4;Q14802-2	81;81	Q14802-4	Q14802-4			QAGRGWGSPPLTTQLSPTGAKCKCKFGQKSG	sp|Q14802-4|FXYD3_HUMAN Isoform 4 of FXYD domain-containing ion transport regulator 3 OS=Homo sapiens OX=9606 GN=FXYD3;sp|Q14802-2|FXYD3_HUMAN Isoform 2 of FXYD domain-containing ion transport regulator 3 OS=Homo sapiens OX=9606 GN=FXYD3	1	2940	0	NaN	NaN	NaN	NaN	NaN	NaN	NaN	NaN	NaN	NaN	NaN	NaN	NaN	NaN	NaN	NaN	NaN
UID12931	S	3	___1	GPEEEEIGS(1)PEPMAAPASASQK	1	3.76e-29	155.97	141.38	155.97	0.29433	66362000	344	0	1	NaN	NaN	1	0.999894	NaN	0.999996	NaN	Q14807-2;Q14807	344;412	Q14807-2	Q14807-2	Kinesin-like protein KIF22	KIF22	PEAKRARGPEEEEIGSPEPMAAPASASQKLS	sp|Q14807-2|KIF22_HUMAN Isoform 2 of Kinesin-like protein KIF22 OS=Homo sapiens OX=9606 GN=KIF22;sp|Q14807|KIF22_HUMAN Kinesin-like protein KIF22 OS=Homo sapiens OX=9606 GN=KIF22 PE=1 SV=5	1	2941	0	NaN	NaN	NaN	NaN	NaN	NaN	NaN	NaN	NaN	NaN	NaN	NaN	NaN	NaN	NaN	NaN	NaN
UID12975	S	2	___1	DS(0.5)FS(0.5)GVK	0.5	0.00840552	104.01	68.718	104.01	0.68239	70242000	266	0	NaN	0	NaN	NaN	0.5	NaN	NaN	NaN	Q14865;Q14865-2;Q14865-3	266;23;266	Q14865	Q14865	AT-rich interactive domain-containing protein 5B	ARID5B	RPRKKKPCPQRRDSFSGVKDSNNNSDGKAVA	sp|Q14865|ARI5B_HUMAN AT-rich interactive domain-containing protein 5B OS=Homo sapiens OX=9606 GN=ARID5B PE=1 SV=3;sp|Q14865-2|ARI5B_HUMAN Isoform 2 of AT-rich interactive domain-containing protein 5B OS=Homo sapiens OX=9606 GN=ARID5B;sp|Q14865-3|ARI5B_HUM	1	2946	0	NaN	NaN	NaN	NaN	NaN	NaN	NaN	NaN	NaN	NaN	NaN	NaN	NaN	NaN	NaN	NaN	NaN
UID12993	S	3	___1	SIDDSEMES(1)PVDDVFYPGTGR	0.999995	1.88e-13	128.29	110.23	128.29	-0.13078	159910000	280	0.999995	0	0	NaN	NaN	0.996672	0	0	0	Q14938-6;Q14938-5;Q14938-3;Q14938-4;Q14938;Q14938-2	280;287;288;280;288;288	Q14938-6	Q14938-6	Nuclear factor 1 X-type	NFIX	STTKRPKSIDDSEMESPVDDVFYPGTGRSPA	sp|Q14938-6|NFIX_HUMAN Isoform 6 of Nuclear factor 1 X-type OS=Homo sapiens OX=9606 GN=NFIX;sp|Q14938-5|NFIX_HUMAN Isoform 5 of Nuclear factor 1 X-type OS=Homo sapiens OX=9606 GN=NFIX;sp|Q14938-3|NFIX_HUMAN Isoform 3 of Nuclear factor 1 X-type OS=Homo sapi	1	2949	0	NaN	NaN	NaN	NaN	NaN	NaN	NaN	NaN	NaN	NaN	NaN	NaN	NaN	NaN	NaN	NaN	NaN
UID13011	S	3	___1	S(0.407)VAS(0.593)DVPEELDFLVPK	0.593378	0.00405217	58.577	30.608	58.577	-0.37321	46076000	1913	NaN	NaN	NaN	NaN	0	0.593378	0	0.528801	NaN	Q14966;Q14966-5	1913;1010	Q14966	Q14966	Zinc finger protein 638	ZNF638	KRKKTEDSSSGKSVASDVPEELDFLVPKAGF	sp|Q14966|ZN638_HUMAN Zinc finger protein 638 OS=Homo sapiens OX=9606 GN=ZNF638 PE=1 SV=2;sp|Q14966-5|ZN638_HUMAN Isoform 5 of Zinc finger protein 638 OS=Homo sapiens OX=9606 GN=ZNF638	1	2950	0	NaN	NaN	NaN	NaN	NaN	NaN	NaN	NaN	NaN	NaN	NaN	NaN	NaN	NaN	NaN	NaN	NaN
UID13055	S	4	___1	TCYPLES(0.087)RPS(0.859)LS(0.053)LGTITDEEMK	0.859403	1.12e-158	255.42	227.75	255.42	-0.20017	113800000	1931	0.845544	0	NaN	0	0.859403	NaN	NaN	0.779746	NaN	Q14980-2;Q14980;Q14980-5	1931;1945;809	Q14980-2	Q14980-2	Nuclear mitotic apparatus protein 1	NUMA1	CPPHLKTCYPLESRPSLSLGTITDEEMKTGD	sp|Q14980-2|NUMA1_HUMAN Isoform 2 of Nuclear mitotic apparatus protein 1 OS=Homo sapiens OX=9606 GN=NUMA1;sp|Q14980|NUMA1_HUMAN Nuclear mitotic apparatus protein 1 OS=Homo sapiens OX=9606 GN=NUMA1 PE=1 SV=2;sp|Q14980-5|NUMA1_HUMAN Isoform 5 of Nuclear mito	1	2953	0	NaN	NaN	NaN	NaN	NaN	NaN	NaN	NaN	NaN	NaN	NaN	NaN	NaN	NaN	NaN	NaN	NaN
UID13097	S	3	___1	FSLCS(0.002)DNLEGIS(0.999)EGPS(1)NR	0.999561	2.89e-11	129.84	111.74	46.22	0.37822	131830000	580	NaN	0	0.989873	NaN	0	0.997889	0.999561	NaN	0.998178	Q14C86-6;Q14C86-5;Q14C86-2;Q14C86;Q14C86-3	580;580;580;580;580	Q14C86-6	Q14C86-6	GTPase-activating protein and VPS9 domain-containing protein 1	GAPVD1	FSLCSDNLEGISEGPSNRSNSVSSLDLEGES	sp|Q14C86-6|GAPD1_HUMAN Isoform 6 of GTPase-activating protein and VPS9 domain-containing protein 1 OS=Homo sapiens OX=9606 GN=GAPVD1;sp|Q14C86-5|GAPD1_HUMAN Isoform 5 of GTPase-activating protein and VPS9 domain-containing protein 1 OS=Homo sapiens OX=960	1;2	2958	0	NaN	NaN	NaN	NaN	NaN	NaN	NaN	NaN	NaN	NaN	NaN	NaN	NaN	NaN	NaN	NaN	NaN
UID13099	S	2	___1	FSTLTDDPS(1)PR	0.999951	4.26e-05	110.64	96.974	110.64	0.024799	369740000	1046	0.998181	0	NaN	NaN	0.999862	0.999951	0.997828	0	0.999047	Q14C86-6;Q14C86-5;Q14C86-2;Q14C86;Q14C86-4	1046;993;1019;1019;998	Q14C86-6	Q14C86-6	GTPase-activating protein and VPS9 domain-containing protein 1	GAPVD1	DDLGPDRFSTLTDDPSPRLSAQAQVAEDILD	sp|Q14C86-6|GAPD1_HUMAN Isoform 6 of GTPase-activating protein and VPS9 domain-containing protein 1 OS=Homo sapiens OX=9606 GN=GAPVD1;sp|Q14C86-5|GAPD1_HUMAN Isoform 5 of GTPase-activating protein and VPS9 domain-containing protein 1 OS=Homo sapiens OX=960	1	2958	0	NaN	NaN	NaN	NaN	NaN	NaN	NaN	NaN	NaN	NaN	NaN	NaN	NaN	NaN	NaN	NaN	NaN
UID13120	S	2	___1	LTVVS(1)PNR	0.999935	0.0140076	70.496	51.774	70.496	-0.95558	176440000	167	NaN	NaN	NaN	0	0.999935	0	NaN	NaN	NaN	Q14CZ0	167	Q14CZ0	Q14CZ0	UPF0472 protein C16orf72	C16orf72	PPPRNSRAPPRLTVVSPNRATSTETSSSVET	sp|Q14CZ0|CP072_HUMAN UPF0472 protein C16orf72 OS=Homo sapiens OX=9606 GN=C16orf72 PE=1 SV=1	1	2963	0	NaN	NaN	NaN	NaN	NaN	NaN	NaN	NaN	NaN	NaN	NaN	NaN	NaN	NaN	NaN	NaN	NaN
UID13140	S	3	___1	T(0.185)S(0.814)GS(0.001)GFHR	0.813829	0.00499789	72.365	64.14	72.365	0.080313	79185000	288	0	NaN	0.498164	0.474319	0.793328	0	0	0.813829	0	Q15007	288	Q15007	Q15007	Pre-mRNA-splicing regulator WTAP	WTAP	LTNGPSNGSSSRQRTSGSGFHREGNTTEDDF	sp|Q15007|FL2D_HUMAN Pre-mRNA-splicing regulator WTAP OS=Homo sapiens OX=9606 GN=WTAP PE=1 SV=2	1	2968	0	NaN	NaN	NaN	NaN	NaN	NaN	NaN	NaN	NaN	NaN	NaN	NaN	NaN	NaN	NaN	NaN	NaN
UID13188	S	3	___1	S(1)PPLLES(0.985)PDAT(0.015)R	1	2.61e-06	99.941	54.805	86.005	0.056517	267760000	390	0.999999	0.999945	NaN	0.999898	0.999948	0.999999	1	0.999996	0.999995	Q15036-2;Q15036	390;415	Q15036-2	Q15036-2	Sorting nexin-17	SNX17	VGGTLRRSDSQQAVKSPPLLESPDATRESMV	sp|Q15036-2|SNX17_HUMAN Isoform 2 of Sorting nexin-17 OS=Homo sapiens OX=9606 GN=SNX17;sp|Q15036|SNX17_HUMAN Sorting nexin-17 OS=Homo sapiens OX=9606 GN=SNX17 PE=1 SV=1	1;2	2982	0	NaN	NaN	NaN	NaN	NaN	NaN	NaN	NaN	NaN	NaN	NaN	NaN	NaN	NaN	NaN	NaN	NaN
UID13226	S	3	___1	RPS(0.606)GRDT(0.392)PIS(0.001)EGPK	0.606258	0.000499788	79.805	56.2	65.225	-0.040201	41836000	911	0.589413	NaN	0	NaN	0.606258	NaN	NaN	NaN	0	Q15058	911	Q15058	Q15058	Kinesin-like protein KIF14	KIF14	FRFNHPVEVQKGKRPSGRDTPISEGPKDFEF	sp|Q15058|KIF14_HUMAN Kinesin-like protein KIF14 OS=Homo sapiens OX=9606 GN=KIF14 PE=1 SV=1	1	2994	0	NaN	NaN	NaN	NaN	NaN	NaN	NaN	NaN	NaN	NaN	NaN	NaN	NaN	NaN	NaN	NaN	NaN
UID13251	S	4	___1	S(0.21)NS(0.782)QS(0.009)YIGRPIHLDK	0.78166	3.31e-05	107.78	84.299	107.78	-0.020986	18178000	249	NaN	NaN	NaN	NaN	NaN	0.78166	NaN	NaN	NaN	Q15139	249	Q15139	Q15139	Serine/threonine-protein kinase D1	PRKD1	KSPSESFIGREKRSNSQSYIGRPIHLDKILM	sp|Q15139|KPCD1_HUMAN Serine/threonine-protein kinase D1 OS=Homo sapiens OX=9606 GN=PRKD1 PE=1 SV=2	1	3005	0	NaN	NaN	NaN	NaN	NaN	NaN	NaN	NaN	NaN	NaN	NaN	NaN	NaN	NaN	NaN	NaN	NaN
UID13259	S	4	___1	AGTLSITEFADMLS(0.818)GNAGGFRS(0.182)R	0.817546	4e-37	161.39	142.32	161.39	-0.31695	17346000	4374	NaN	NaN	NaN	0	0.817546	NaN	0	0	NaN	Q15149;Q15149-7;Q15149-8;Q15149-9;Q15149-5;Q15149-6;Q15149-3;Q15149-2;Q15149-4	4374;4205;4215;4223;4237;4241;4260;4264;4237	Q15149;Q15149-3;Q15149-4	Q15149	Plectin	PLEC	YRAGTLSITEFADMLSGNAGGFRSRSSSVGS	sp|Q15149|PLEC_HUMAN Plectin OS=Homo sapiens OX=9606 GN=PLEC PE=1 SV=3;sp|Q15149-7|PLEC_HUMAN Isoform 7 of Plectin OS=Homo sapiens OX=9606 GN=PLEC;sp|Q15149-8|PLEC_HUMAN Isoform 8 of Plectin OS=Homo sapiens OX=9606 GN=PLEC;sp|Q15149-9|PLEC_HUMAN Isoform 9	1	3007;3008;3009	0	NaN	NaN	NaN	NaN	NaN	NaN	NaN	NaN	NaN	NaN	NaN	NaN	NaN	NaN	NaN	NaN	NaN
UID13288	S	2	___1	SSS(0.008)VGS(0.966)S(0.025)S(0.001)SYPISPAVSR	0.966248	1.1e-93	212.95	190.23	212.95	-0.07552	3068700000	4389	0.960336	0.732655	0.905763	0.734514	0.818863	0.911848	0.966248	0.789137	0.678973	Q15149;Q15149-7;Q15149-8;Q15149-9;Q15149-5;Q15149-6;Q15149-3;Q15149-2;Q15149-4	4389;4220;4230;4238;4252;4256;4275;4279;4252	Q15149;Q15149-3;Q15149-4	Q15149	Plectin	PLEC	SGNAGGFRSRSSSVGSSSSYPISPAVSRTQL	sp|Q15149|PLEC_HUMAN Plectin OS=Homo sapiens OX=9606 GN=PLEC PE=1 SV=3;sp|Q15149-7|PLEC_HUMAN Isoform 7 of Plectin OS=Homo sapiens OX=9606 GN=PLEC;sp|Q15149-8|PLEC_HUMAN Isoform 8 of Plectin OS=Homo sapiens OX=9606 GN=PLEC;sp|Q15149-9|PLEC_HUMAN Isoform 9	1;2;3	3007;3008;3009	0	NaN	NaN	NaN	NaN	NaN	NaN	NaN	NaN	NaN	NaN	NaN	NaN	NaN	NaN	NaN	NaN	NaN
UID13348	S	4	___1	S(0.142)QGS(0.858)QAELHPLPQLK	0.857855	1.45e-05	109.42	72.409	109.42	0.1602	29282000	49	NaN	NaN	NaN	0	0.857855	0	NaN	NaN	NaN	Q15172	49	Q15172	Q15172	Serine/threonine-protein phosphatase 2A 56 kDa regulatory subunit alpha isoform	PPP2R5A	RQKRSQGSSQFRSQGSQAELHPLPQLKDATS	sp|Q15172|2A5A_HUMAN Serine/threonine-protein phosphatase 2A 56 kDa regulatory subunit alpha isoform OS=Homo sapiens OX=9606 GN=PPP2R5A PE=1 SV=1	1	3014	0	NaN	NaN	NaN	NaN	NaN	NaN	NaN	NaN	NaN	NaN	NaN	NaN	NaN	NaN	NaN	NaN	NaN
UID13408	S	4	___1	RS(0.411)PS(0.589)APAATSSASSSTSSYK	0.588857	1.02e-06	94.057	28.381	94.057	-0.02032	34702000	359	0	NaN	NaN	NaN	0.588857	0.499117	0	NaN	0	Q15345-3;Q15345	359;359	Q15345-3	Q15345-3	Leucine-rich repeat-containing protein 41	LRRC41	PPATSHEAPGTKRSPSAPAATSSASSSTSSY	sp|Q15345-3|LRC41_HUMAN Isoform 3 of Leucine-rich repeat-containing protein 41 OS=Homo sapiens OX=9606 GN=LRRC41;sp|Q15345|LRC41_HUMAN Leucine-rich repeat-containing protein 41 OS=Homo sapiens OX=9606 GN=LRRC41 PE=1 SV=3	1	3035	0	NaN	NaN	NaN	NaN	NaN	NaN	NaN	NaN	NaN	NaN	NaN	NaN	NaN	NaN	NaN	NaN	NaN
UID13409	S	3	___1	S(0.987)T(0.013)QESLTAGGTDLKR	0.987144	5.18e-24	150.65	114.92	100.21	0.13272	157550000	326	0.499521	0.499673	NaN	0.987144	0	0.78427	NaN	NaN	0	Q15345-3;Q15345	326;326	Q15345-3	Q15345-3	Leucine-rich repeat-containing protein 41	LRRC41	KQMPRAAPATRVTRRSTQESLTAGGTDLKRE	sp|Q15345-3|LRC41_HUMAN Isoform 3 of Leucine-rich repeat-containing protein 41 OS=Homo sapiens OX=9606 GN=LRRC41;sp|Q15345|LRC41_HUMAN Leucine-rich repeat-containing protein 41 OS=Homo sapiens OX=9606 GN=LRRC41 PE=1 SV=3	1	3035	0	NaN	NaN	NaN	NaN	NaN	NaN	NaN	NaN	NaN	NaN	NaN	NaN	NaN	NaN	NaN	NaN	NaN
UID13487	S	3	___1	MLAQSALSPYLS(0.096)S(0.901)PVS(0.002)S(0.001)YQR	0.900707	3.86e-18	140.31	122.82	140.31	0.41003	78243000	285	NaN	NaN	NaN	NaN	0	0.900707	NaN	0	NaN	Q15434	285	Q15434	Q15434	RNA-binding motif, single-stranded-interacting protein 2	RBMS2	PNRMLAQSALSPYLSSPVSSYQRVTQTSPLQ	sp|Q15434|RBMS2_HUMAN RNA-binding motif, single-stranded-interacting protein 2 OS=Homo sapiens OX=9606 GN=RBMS2 PE=1 SV=1	1	3050	0	NaN	NaN	NaN	NaN	NaN	NaN	NaN	NaN	NaN	NaN	NaN	NaN	NaN	NaN	NaN	NaN	NaN
UID13492	S	3	___1	S(0.404)S(0.596)FLQVFNNSPDESSYYR	0.595592	1.69e-56	191.66	178.87	191.66	-0.13602	13786000	588	NaN	NaN	NaN	NaN	NaN	0.595592	NaN	NaN	NaN	Q15436;Q15436-2	588;386	Q15436	Q15436	Protein transport protein Sec23A	SEC23A	TFSLYPQFMFHLRRSSFLQVFNNSPDESSYY	sp|Q15436|SC23A_HUMAN Protein transport protein Sec23A OS=Homo sapiens OX=9606 GN=SEC23A PE=1 SV=2;sp|Q15436-2|SC23A_HUMAN Isoform 2 of Protein transport protein Sec23A OS=Homo sapiens OX=9606 GN=SEC23A	1	3052	0	NaN	NaN	NaN	NaN	NaN	NaN	NaN	NaN	NaN	NaN	NaN	NaN	NaN	NaN	NaN	NaN	NaN
UID13494	S	4	___1	ASKPLPPAPAPDEYLVS(1)PITGEK	0.999891	5.48e-18	139.16	124.23	139.16	0.41152	38722000	348	NaN	NaN	NaN	NaN	NaN	0.999891	NaN	NaN	NaN	Q15459-2;Q15459	348;413	Q15459-2	Q15459-2	Splicing factor 3A subunit 1	SF3A1	SKPLPPAPAPDEYLVSPITGEKIPASKMQEH	sp|Q15459-2|SF3A1_HUMAN Isoform 2 of Splicing factor 3A subunit 1 OS=Homo sapiens OX=9606 GN=SF3A1;sp|Q15459|SF3A1_HUMAN Splicing factor 3A subunit 1 OS=Homo sapiens OX=9606 GN=SF3A1 PE=1 SV=1	1	3053	0	NaN	NaN	NaN	NaN	NaN	NaN	NaN	NaN	NaN	NaN	NaN	NaN	NaN	NaN	NaN	NaN	NaN
UID13559	S	4	___1	S(0.953)PPMELQPPVS(0.477)PQQS(0.57)ECNPVGALQELVVQK	0.570043	2.35e-07	71.974	53.716	46.981	-0.58717	460900000	135	0.499858	0.499526	0.499726	0.499643	0.568751	0.500411	0.499787	0.499358	0.570043	Q15633-2;Q15633	135;156	Q15633-2	Q15633-2	RISC-loading complex subunit TARBP2	TARBP2	RSPPMELQPPVSPQQSECNPVGALQELVVQK	sp|Q15633-2|TRBP2_HUMAN Isoform 2 of RISC-loading complex subunit TARBP2 OS=Homo sapiens OX=9606 GN=TARBP2;sp|Q15633|TRBP2_HUMAN RISC-loading complex subunit TARBP2 OS=Homo sapiens OX=9606 GN=TARBP2 PE=1 SV=3	1;2	3072	0	NaN	NaN	NaN	NaN	NaN	NaN	NaN	NaN	NaN	NaN	NaN	NaN	NaN	NaN	NaN	NaN	NaN
UID13565	S	3	___1	S(0.96)IT(0.04)NTTVCTK	0.960356	0.000146536	104.94	83.635	104.94	0.79694	26614000	397	NaN	NaN	NaN	NaN	0.960356	NaN	NaN	NaN	NaN	Q15637-5;Q15637-4;Q15637-7;Q15637-3;Q15637-2;Q15637;Q15637-6	397;272;246;272;272;272;272	Q15637-5;Q15637-6	Q15637-5	Splicing factor 1	SF1	DDNRILRPWQSSETRSITNTTVCTKCGGAGH	sp|Q15637-5|SF01_HUMAN Isoform 5 of Splicing factor 1 OS=Homo sapiens OX=9606 GN=SF1;sp|Q15637-4|SF01_HUMAN Isoform 4 of Splicing factor 1 OS=Homo sapiens OX=9606 GN=SF1;sp|Q15637-7|SF01_HUMAN Isoform 7 of Splicing factor 1 OS=Homo sapiens OX=9606 GN=SF1;s	1	3073;3074	0	NaN	NaN	NaN	NaN	NaN	NaN	NaN	NaN	NaN	NaN	NaN	NaN	NaN	NaN	NaN	NaN	NaN
UID13568	S	3	___1	YACGLWGLS(0.45)PAS(0.55)R	0.549703	0.00160954	70.197	58.221	70.197	-1.3067	25630000	466	NaN	NaN	NaN	NaN	NaN	0.549703	NaN	NaN	NaN	Q15637-6	466	Q15637-6	Q15637-6	Splicing factor 1	SF1	VPGKYACGLWGLSPASRKRYDAATTYGHDAA	sp|Q15637-6|SF01_HUMAN Isoform 6 of Splicing factor 1 OS=Homo sapiens OX=9606 GN=SF1	1	3074	0	NaN	NaN	NaN	NaN	NaN	NaN	NaN	NaN	NaN	NaN	NaN	NaN	NaN	NaN	NaN	NaN	NaN
UID13575	S	3	___1	S(1)GRDPLAILSEISK	1	8.91e-26	155.49	98.543	155.49	-0.07257	33740000	354	NaN	0	NaN	NaN	0.999999	0.999998	NaN	1	1	Q15642	354	Q15642	Q15642	Cdc42-interacting protein 4	TRIP10	GPVPSALPNGPPSPRSGRDPLAILSEISKSV	sp|Q15642|CIP4_HUMAN Cdc42-interacting protein 4 OS=Homo sapiens OX=9606 GN=TRIP10 PE=1 SV=3	1	3075	0	NaN	NaN	NaN	NaN	NaN	NaN	NaN	NaN	NaN	NaN	NaN	NaN	NaN	NaN	NaN	NaN	NaN
UID13590	S	4	___1	SVPNTPLRPNQQSVVNS(0.071)S(0.41)FS(0.52)ELFVK	0.519718	1.56e-06	79.237	59.515	79.237	0.70959	17139000	1861	0	0	NaN	0	NaN	0.519718	0	0	0	Q15643;Q15643-2	1861;1832	Q15643	Q15643	Thyroid receptor-interacting protein 11	TRIP11	TPLRPNQQSVVNSSFSELFVKFLETESHPSI	sp|Q15643|TRIPB_HUMAN Thyroid receptor-interacting protein 11 OS=Homo sapiens OX=9606 GN=TRIP11 PE=1 SV=3;sp|Q15643-2|TRIPB_HUMAN Isoform 2 of Thyroid receptor-interacting protein 11 OS=Homo sapiens OX=9606 GN=TRIP11	1	3076	0	NaN	NaN	NaN	NaN	NaN	NaN	NaN	NaN	NaN	NaN	NaN	NaN	NaN	NaN	NaN	NaN	NaN
UID13621	S	3	___1	AEEAQKT(0.005)ES(0.995)VDNEGE	0.995049	3.34e-11	131.71	122.66	59.512	0.12542	712320000	93	NaN	0.995049	0.792609	0.95901	0	0.972609	0.981484	0.899956	0.992017	Q15651	93	Q15651	Q15651	High mobility group nucleosome-binding domain-containing protein 3	HMGN3	SENGETKAEEAQKTESVDNEGE_________	sp|Q15651|HMGN3_HUMAN High mobility group nucleosome-binding domain-containing protein 3 OS=Homo sapiens OX=9606 GN=HMGN3 PE=1 SV=2	1	3079	0	NaN	NaN	NaN	NaN	NaN	NaN	NaN	NaN	NaN	NaN	NaN	NaN	NaN	NaN	NaN	NaN	NaN
UID13628	S	4	___1	IKS(0.041)S(0.906)PS(0.053)PEVVKPK	0.906352	6.58e-05	104.2	88.073	85.636	-0.042792	1340200000	639	0	0.877957	0.811307	0.862911	0.906352	0.497393	0.542865	0	0.845413	Q15652;Q15652-3;Q15652-2	639;457;420	Q15652	Q15652	Probable JmjC domain-containing histone demethylation protein 2C	JMJD1C	KSKLNTSVDTHKIKSSPSPEVVKPKITHSPD	sp|Q15652|JHD2C_HUMAN Probable JmjC domain-containing histone demethylation protein 2C OS=Homo sapiens OX=9606 GN=JMJD1C PE=1 SV=2;sp|Q15652-3|JHD2C_HUMAN Isoform 3 of Probable JmjC domain-containing histone demethylation protein 2C OS=Homo sapiens OX=9606	1;2	3080	0	NaN	NaN	NaN	NaN	NaN	NaN	NaN	NaN	NaN	NaN	NaN	NaN	NaN	NaN	NaN	NaN	NaN
UID13681	S	4	___1	ISTVAVQSVNAGAPLIT(0.014)S(0.029)T(0.153)S(0.639)PT(0.135)T(0.029)AT(0.001)SPK	0.63873	1.32e-33	144.26	124.36	123.73	0.43317	23606000	352	NaN	NaN	NaN	0.247537	NaN	0.63873	0	0.34669	0.24352	Q15723-2;Q15723-3;Q15723-1;Q15723;Q15723-4	352;364;412;424;335	Q15723-2	Q15723-2	ETS-related transcription factor Elf-2	ELF2	AVQSVNAGAPLITSTSPTTATSPKVVIQTIP	sp|Q15723-2|ELF2_HUMAN Isoform 2 of ETS-related transcription factor Elf-2 OS=Homo sapiens OX=9606 GN=ELF2;sp|Q15723-3|ELF2_HUMAN Isoform 3 of ETS-related transcription factor Elf-2 OS=Homo sapiens OX=9606 GN=ELF2;sp|Q15723-1|ELF2_HUMAN Isoform 1 of ETS-re	1	3090	0	NaN	NaN	NaN	NaN	NaN	NaN	NaN	NaN	NaN	NaN	NaN	NaN	NaN	NaN	NaN	NaN	NaN
UID13750	S	3	___1	RAS(1)AYEALEK	0.999996	4.68e-05	120.32	66.35	120.32	0.66014	144830000	93	NaN	NaN	0	0.999419	NaN	0.999996	0.998062	0.999242	NaN	Q15785	93	Q15785	Q15785	Mitochondrial import receptor subunit TOM34	TOMM34	LALVPFSIKPLLRRASAYEALEKYPMAYVDY	sp|Q15785|TOM34_HUMAN Mitochondrial import receptor subunit TOM34 OS=Homo sapiens OX=9606 GN=TOMM34 PE=1 SV=2	1	3102	0	NaN	NaN	NaN	NaN	NaN	NaN	NaN	NaN	NaN	NaN	NaN	NaN	NaN	NaN	NaN	NaN	NaN
UID13770	S	3	___1	S(0.867)T(0.062)S(0.062)MDS(0.004)GS(0.004)S(0.001)ESPASLKR	0.86657	0.00198935	51.876	38.998	46.982	-0.4345	47858000	934	0	0	0.469094	NaN	0.721528	0	NaN	0.86657	NaN	Q15811-12;Q15811-11;Q15811-3;Q15811-10;Q15811-7;Q15811-2;Q15811-4;Q15811-9;Q15811-8;Q15811;Q15811-6	934;939;971;934;971;976;976;971;971;976;971	Q15811-12	Q15811-12	Intersectin-1	ITSN1	FPKSYVKLISGPIRKSTSMDSGSSESPASLK	sp|Q15811-12|ITSN1_HUMAN Isoform 12 of Intersectin-1 OS=Homo sapiens OX=9606 GN=ITSN1;sp|Q15811-11|ITSN1_HUMAN Isoform 11 of Intersectin-1 OS=Homo sapiens OX=9606 GN=ITSN1;sp|Q15811-3|ITSN1_HUMAN Isoform 3 of Intersectin-1 OS=Homo sapiens OX=9606 GN=ITSN1;	1	3106	0	NaN	NaN	NaN	NaN	NaN	NaN	NaN	NaN	NaN	NaN	NaN	NaN	NaN	NaN	NaN	NaN	NaN
UID13772	S	3	___1	STSMDS(0.028)GS(0.104)S(0.626)ES(0.242)PASLKR	0.625665	0.000626533	70.99	51.093	70.99	-0.69593	91222000	942	0	0	NaN	NaN	0.625665	0	NaN	NaN	NaN	Q15811-12;Q15811-11;Q15811-3;Q15811-10;Q15811-7;Q15811-2;Q15811-4;Q15811-9;Q15811-8;Q15811;Q15811-6	942;947;979;942;979;984;984;979;979;984;979	Q15811-12	Q15811-12	Intersectin-1	ITSN1	ISGPIRKSTSMDSGSSESPASLKRVASPAAK	sp|Q15811-12|ITSN1_HUMAN Isoform 12 of Intersectin-1 OS=Homo sapiens OX=9606 GN=ITSN1;sp|Q15811-11|ITSN1_HUMAN Isoform 11 of Intersectin-1 OS=Homo sapiens OX=9606 GN=ITSN1;sp|Q15811-3|ITSN1_HUMAN Isoform 3 of Intersectin-1 OS=Homo sapiens OX=9606 GN=ITSN1;	1	3106	0	NaN	NaN	NaN	NaN	NaN	NaN	NaN	NaN	NaN	NaN	NaN	NaN	NaN	NaN	NaN	NaN	NaN
UID13826	S	2	___1	ILEQQNS(0.958)S(0.042)R	0.957888	0.00208375	77.867	46.389	56.951	1.4743	73402000	422	NaN	0	NaN	0.957888	NaN	0.86106	NaN	NaN	NaN	Q16181-2;Q16181	422;423	Q16181-2	Q16181-2	Septin-7	44446	KANWEAQQRILEQQNSSRTLEKNKKKGKIF_	sp|Q16181-2|SEPT7_HUMAN Isoform 2 of Septin-7 OS=Homo sapiens OX=9606 GN=SEPTIN7;sp|Q16181|SEPT7_HUMAN Septin-7 OS=Homo sapiens OX=9606 GN=SEPTIN7 PE=1 SV=2	1	3122	0	NaN	NaN	NaN	NaN	NaN	NaN	NaN	NaN	NaN	NaN	NaN	NaN	NaN	NaN	NaN	NaN	NaN
UID13859	S	4	___1	DPPS(0.175)S(0.73)PS(0.043)S(0.049)LS(0.003)SPIQESTAPELPSETQETPGPALCSPLR	0.729977	1.93e-43	125.49	114.48	125.49	0.074774	384030000	573	0.272118	NaN	NaN	0	0.729977	0.605926	0	NaN	NaN	Q16512;Q16512-2	573;579	Q16512	Q16512	Serine/threonine-protein kinase N1	PKN1	DSDSSPQKSSRDPPSSPSSLSSPIQESTAPE	sp|Q16512|PKN1_HUMAN Serine/threonine-protein kinase N1 OS=Homo sapiens OX=9606 GN=PKN1 PE=1 SV=2;sp|Q16512-2|PKN1_HUMAN Isoform 2 of Serine/threonine-protein kinase N1 OS=Homo sapiens OX=9606 GN=PKN1	1	3129	0	NaN	NaN	NaN	NaN	NaN	NaN	NaN	NaN	NaN	NaN	NaN	NaN	NaN	NaN	NaN	NaN	NaN
UID13924	S	3	___1	FTVQMPT(0.001)S(0.002)QS(0.996)PAVK	0.996182	3.23e-05	94.845	79.872	69.111	-0.0027106	224100000	196	NaN	0	0.867667	0.859674	0.942022	0.967538	0	0.996182	0.972212	Q16594	196	Q16594	Q16594	Transcription initiation factor TFIID subunit 9	TAF9	SLTGQRFTVQMPTSQSPAVKASIPATSAVQN	sp|Q16594|TAF9_HUMAN Transcription initiation factor TFIID subunit 9 OS=Homo sapiens OX=9606 GN=TAF9 PE=1 SV=1	1	3142	0	NaN	NaN	NaN	NaN	NaN	NaN	NaN	NaN	NaN	NaN	NaN	NaN	NaN	NaN	NaN	NaN	NaN
UID13941	S	3	___1	VDS(1)PMAYS(0.881)S(0.119)NGK	0.881125	9.94e-05	92.866	69.49	84.859	-0.18408	401340000	326	0	0.842741	0.494825	0.503569	0.825543	0.503569	0.881125	0	0.497566	Q16625-3;Q16625;Q16625-4;Q16625-2	326;326;75;272	Q16625-3	Q16625-3	Occludin	OCLN	PPSDYVERVDSPMAYSSNGKVNDKRFYPESS	sp|Q16625-3|OCLN_HUMAN Isoform 3 of Occludin OS=Homo sapiens OX=9606 GN=OCLN;sp|Q16625|OCLN_HUMAN Occludin OS=Homo sapiens OX=9606 GN=OCLN PE=1 SV=1;sp|Q16625-4|OCLN_HUMAN Isoform 4 of Occludin OS=Homo sapiens OX=9606 GN=OCLN;sp|Q16625-2|OCLN_HUMAN Isoform	1;2	3145	0	NaN	NaN	NaN	NaN	NaN	NaN	NaN	NaN	NaN	NaN	NaN	NaN	NaN	NaN	NaN	NaN	NaN
UID13964	S	4	___1	S(1)PGNKS(1)DNIKPK	1	0.000454389	84.94	69.739	51.147	0.22899	541520000	175	NaN	NaN	1	NaN	1	NaN	1	NaN	NaN	Q16637-4;Q16637-2;Q16637-3;Q16637	175;175;175;175	Q16637-4	Q16637-4	Survival motor neuron protein	SMN1	ENESQVSTDESENSRSPGNKSDNIKPKSAPW	sp|Q16637-4|SMN_HUMAN Isoform SMN-delta57 of Survival motor neuron protein OS=Homo sapiens OX=9606 GN=SMN1;sp|Q16637-2|SMN_HUMAN Isoform SMN-delta5 of Survival motor neuron protein OS=Homo sapiens OX=9606 GN=SMN1;sp|Q16637-3|SMN_HUMAN Isoform SMN-delta7 of	1;2	3149	0	NaN	NaN	NaN	NaN	NaN	NaN	NaN	NaN	NaN	NaN	NaN	NaN	NaN	NaN	NaN	NaN	NaN
UID14032	S	3	___1	KS(1)IQSGPLK	0.999988	0.00132138	90.05	56.16	73.881	-0.1218	360360000	103	0.991742	NaN	NaN	NaN	0.913071	0.987951	NaN	0.999988	NaN	Q16891-2;Q16891-4;Q16891;Q16891-3	103;103;103;103	Q16891-2	Q16891-2	MICOS complex subunit MIC60	IMMT	MVLGPAAYNVPLPKKSIQSGPLKISSVSEVM	sp|Q16891-2|MIC60_HUMAN Isoform 2 of MICOS complex subunit MIC60 OS=Homo sapiens OX=9606 GN=IMMT;sp|Q16891-4|MIC60_HUMAN Isoform 4 of MICOS complex subunit MIC60 OS=Homo sapiens OX=9606 GN=IMMT;sp|Q16891|MIC60_HUMAN MICOS complex subunit MIC60 OS=Homo sapi	1	3172	0	NaN	NaN	NaN	NaN	NaN	NaN	NaN	NaN	NaN	NaN	NaN	NaN	NaN	NaN	NaN	NaN	NaN
UID14114	S	4	___1	ISAISEKPLS(1)PHPIR	0.999997	5.5e-17	146.1	122.06	146.1	-0.13606	62657000	826	NaN	NaN	NaN	NaN	0.999997	NaN	NaN	NaN	NaN	Q2KHM9;Q2KHM9-2	826;527	Q2KHM9	Q2KHM9	Uncharacterized protein KIAA0753	KIAA0753	ENNDQKISAISEKPLSPHPIRITKTVDRKDP	sp|Q2KHM9|MOONR_HUMAN Protein moonraker OS=Homo sapiens OX=9606 GN=KIAA0753 PE=1 SV=3;sp|Q2KHM9-2|MOONR_HUMAN Isoform 2 of Protein moonraker OS=Homo sapiens OX=9606 GN=KIAA0753	1	3187	0	NaN	NaN	NaN	NaN	NaN	NaN	NaN	NaN	NaN	NaN	NaN	NaN	NaN	NaN	NaN	NaN	NaN
UID14180	S	3	___1	EQGGS(0.005)GLGS(0.949)GS(0.037)S(0.01)GGGGSTSGLGSGYIGR	0.948938	7.66e-29	132.73	116.05	100.59	0.61456	126420000	18	NaN	0	NaN	NaN	NaN	0.75617	0.936253	0.948938	NaN	Q2M2I8-2;Q2M2I8	18;18	Q2M2I8-2	Q2M2I8-2	AP2-associated protein kinase 1	AAK1	KFFDSRREQGGSGLGSGSSGGGGSTSGLGSG	sp|Q2M2I8-2|AAK1_HUMAN Isoform 2 of AP2-associated protein kinase 1 OS=Homo sapiens OX=9606 GN=AAK1;sp|Q2M2I8|AAK1_HUMAN AP2-associated protein kinase 1 OS=Homo sapiens OX=9606 GN=AAK1 PE=1 SV=3	1	3197	0	NaN	NaN	NaN	NaN	NaN	NaN	NaN	NaN	NaN	NaN	NaN	NaN	NaN	NaN	NaN	NaN	NaN
UID14181	S	3	___1	EQGGSGLGS(0.005)GS(0.592)S(0.402)GGGGSTSGLGSGYIGR	0.59242	5.84e-121	221.27	198.21	130.57	-0.24477	215310000	20	NaN	0	NaN	0.499897	0.59242	0.496112	NaN	NaN	NaN	Q2M2I8-2;Q2M2I8	20;20	Q2M2I8-2	Q2M2I8-2	AP2-associated protein kinase 1	AAK1	FDSRREQGGSGLGSGSSGGGGSTSGLGSGYI	sp|Q2M2I8-2|AAK1_HUMAN Isoform 2 of AP2-associated protein kinase 1 OS=Homo sapiens OX=9606 GN=AAK1;sp|Q2M2I8|AAK1_HUMAN AP2-associated protein kinase 1 OS=Homo sapiens OX=9606 GN=AAK1 PE=1 SV=3	1	3197	0	NaN	NaN	NaN	NaN	NaN	NaN	NaN	NaN	NaN	NaN	NaN	NaN	NaN	NaN	NaN	NaN	NaN
UID14283	S	2	___1	S(0.003)T(0.003)S(0.022)PS(0.972)AAGGQQK	0.972232	0.00205298	76.679	48.28	76.679	0.36735	11529000	464	NaN	NaN	NaN	NaN	0.972232	NaN	NaN	NaN	0.290745	Q2TB10	464	Q2TB10	Q2TB10	Zinc finger protein 800	ZNF800	NKVKQDSESPKSTSPSAAGGQQKTRKPKLSA	sp|Q2TB10|ZN800_HUMAN Zinc finger protein 800 OS=Homo sapiens OX=9606 GN=ZNF800 PE=1 SV=1	1	3215	0	NaN	NaN	NaN	NaN	NaN	NaN	NaN	NaN	NaN	NaN	NaN	NaN	NaN	NaN	NaN	NaN	NaN
UID14403	S	3	___1	VIEPPAAS(0.663)CPS(0.698)S(0.639)PR	0.69848	1.84e-09	107.99	73.226	45.557	-0.07107	164500000	511	0	0.663044	0.414372	0.498476	0.618782	0.474921	0.65783	0.69848	0.653535	Q3MIN7;Q3MIN7-2	511;511	Q3MIN7	Q3MIN7	Ral guanine nucleotide dissociation stimulator-like 3	RGL3	YRLSRVIEPPAASCPSSPRIRRRISLTKRLS	sp|Q3MIN7|RGL3_HUMAN Ral guanine nucleotide dissociation stimulator-like 3 OS=Homo sapiens OX=9606 GN=RGL3 PE=1 SV=2;sp|Q3MIN7-2|RGL3_HUMAN Isoform 2 of Ral guanine nucleotide dissociation stimulator-like 3 OS=Homo sapiens OX=9606 GN=RGL3	1;2	3243	0	NaN	NaN	NaN	NaN	NaN	NaN	NaN	NaN	NaN	NaN	NaN	NaN	NaN	NaN	NaN	NaN	NaN
UID14409	S	3	___1	VTCEDLES(0.019)DS(0.981)PLAPGPFSK	0.981335	9.85e-08	113.17	93.444	113.17	0.17267	31588000	85	0.896369	NaN	NaN	NaN	0.981335	NaN	NaN	NaN	NaN	Q3SY56	85	Q3SY56	Q3SY56	Transcription factor Sp6	SP6	PGASSRVTCEDLESDSPLAPGPFSKLLQPDM	sp|Q3SY56|SP6_HUMAN Transcription factor Sp6 OS=Homo sapiens OX=9606 GN=SP6 PE=2 SV=1	1	3247	0	NaN	NaN	NaN	NaN	NaN	NaN	NaN	NaN	NaN	NaN	NaN	NaN	NaN	NaN	NaN	NaN	NaN
UID14473	S	3	___1	SSFLS(0.679)S(0.321)PER	0.679038	0.00525774	65.395	42.277	65.395	-0.24783	11485000	2131	0	NaN	NaN	NaN	0.679038	NaN	NaN	0	NaN	Q4AC94	2131	Q4AC94	Q4AC94	C2 domain-containing protein 3	C2CD3	GPFCREELMVKSSFLSSPERAVNPHLPRQGS	sp|Q4AC94|C2CD3_HUMAN C2 domain-containing protein 3 OS=Homo sapiens OX=9606 GN=C2CD3 PE=1 SV=4	1	3259	0	NaN	NaN	NaN	NaN	NaN	NaN	NaN	NaN	NaN	NaN	NaN	NaN	NaN	NaN	NaN	NaN	NaN
UID14477	S	3	___1	T(0.17)LS(0.829)MPSGPSGK	0.829286	1.29e-06	93.649	75.285	87.831	-0.2124	76529000	1037	NaN	NaN	NaN	NaN	0.638186	0.829286	NaN	NaN	0.828574	Q4ADV7-2;Q4ADV7-3;Q4ADV7	1037;1000;1037	Q4ADV7-2	Q4ADV7-2	RAB6A-GEF complex partner protein 1	RIC1	AENVPASKFSLQKTLSMPSGPSGKRWSKDSD	sp|Q4ADV7-2|RIC1_HUMAN Isoform 2 of RAB6A-GEF complex partner protein 1 OS=Homo sapiens OX=9606 GN=RIC1;sp|Q4ADV7-3|RIC1_HUMAN Isoform 3 of RAB6A-GEF complex partner protein 1 OS=Homo sapiens OX=9606 GN=RIC1;sp|Q4ADV7|RIC1_HUMAN RAB6A-GEF complex partner p	1	3260	0	NaN	NaN	NaN	NaN	NaN	NaN	NaN	NaN	NaN	NaN	NaN	NaN	NaN	NaN	NaN	NaN	NaN
UID14490	S	3	___1	EENMDT(0.001)S(0.007)NT(0.063)S(0.922)IS(0.008)K	0.921825	0.00131678	70.117	49.164	70.117	0.44309	148900000	254	NaN	NaN	NaN	0	0.921825	NaN	NaN	0	NaN	Q4G0J3-3;Q4G0J3	254;247	Q4G0J3-3	Q4G0J3-3	La-related protein 7	LARP7	DNIQAKEENMDTSNTSISKMKRSRPTSEGSD	sp|Q4G0J3-3|LARP7_HUMAN Isoform 3 of La-related protein 7 OS=Homo sapiens OX=9606 GN=LARP7;sp|Q4G0J3|LARP7_HUMAN La-related protein 7 OS=Homo sapiens OX=9606 GN=LARP7 PE=1 SV=1	1	3263	0	NaN	NaN	NaN	NaN	NaN	NaN	NaN	NaN	NaN	NaN	NaN	NaN	NaN	NaN	NaN	NaN	NaN
UID14544	S	3	___1	AQTPESCGS(0.709)LT(0.291)PER	0.708554	1.74e-05	103.88	91.304	103.88	0.21077	37420000	568	NaN	NaN	0	0	NaN	0.708554	NaN	NaN	0	Q4L180-6;Q4L180-5;Q4L180-3;Q4L180-7;Q4L180-2;Q4L180	568;738;752;752;992;992	Q4L180-6	Q4L180-6	Filamin A-interacting protein 1-like	FILIP1L	TMATFARAQTPESCGSLTPERTMSPIQVLAV	sp|Q4L180-6|FIL1L_HUMAN Isoform 6 of Filamin A-interacting protein 1-like OS=Homo sapiens OX=9606 GN=FILIP1L;sp|Q4L180-5|FIL1L_HUMAN Isoform 5 of Filamin A-interacting protein 1-like OS=Homo sapiens OX=9606 GN=FILIP1L;sp|Q4L180-3|FIL1L_HUMAN Isoform 3 of F	1	3270	0	NaN	NaN	NaN	NaN	NaN	NaN	NaN	NaN	NaN	NaN	NaN	NaN	NaN	NaN	NaN	NaN	NaN
UID14558	S	3	___1	SGLEELVLS(0.614)EMNS(0.324)PS(0.062)R	0.614312	0.000883296	70.98	65.77	43.297	1.9121	109980000	651	NaN	0.614312	NaN	NaN	0	0.601024	0.574567	0	0	Q4V328;Q4V328-4;Q4V328-2;Q4V328-3	651;620;572;541	Q4V328;Q4V328-3	Q4V328	GRIP1-associated protein 1	GRIPAP1	LTNSKSRSGLEELVLSEMNSPSRTQTGDSSS	sp|Q4V328|GRAP1_HUMAN GRIP1-associated protein 1 OS=Homo sapiens OX=9606 GN=GRIPAP1 PE=1 SV=2;sp|Q4V328-4|GRAP1_HUMAN Isoform 4 of GRIP1-associated protein 1 OS=Homo sapiens OX=9606 GN=GRIPAP1;sp|Q4V328-2|GRAP1_HUMAN Isoform 2 of GRIP1-associated protein 1	1	3274;3275	0	NaN	NaN	NaN	NaN	NaN	NaN	NaN	NaN	NaN	NaN	NaN	NaN	NaN	NaN	NaN	NaN	NaN
UID14565	S	3	___1	T(0.002)QT(0.003)GDS(0.133)S(0.865)S(0.979)IS(0.013)S(0.004)FSYR	0.865402	2.52e-32	156.13	143.79	87.24	-0.0789	327530000	665	0.642006	0.652085	NaN	NaN	NaN	0.865402	0	NaN	NaN	Q4V328;Q4V328-4;Q4V328-2;Q4V328-3	665;634;586;555	Q4V328;Q4V328-3	Q4V328	GRIP1-associated protein 1	GRIPAP1	LSEMNSPSRTQTGDSSSISSFSYREILREKE	sp|Q4V328|GRAP1_HUMAN GRIP1-associated protein 1 OS=Homo sapiens OX=9606 GN=GRIPAP1 PE=1 SV=2;sp|Q4V328-4|GRAP1_HUMAN Isoform 4 of GRIP1-associated protein 1 OS=Homo sapiens OX=9606 GN=GRIPAP1;sp|Q4V328-2|GRAP1_HUMAN Isoform 2 of GRIP1-associated protein 1	1;2	3274;3275	0	NaN	NaN	NaN	NaN	NaN	NaN	NaN	NaN	NaN	NaN	NaN	NaN	NaN	NaN	NaN	NaN	NaN
UID14586	S	2	___1	SPIT(0.043)S(0.726)S(0.231)PPK	0.726097	1.47e-05	162.36	96.516	162.36	-0.20362	172810000	52	0.460456	NaN	0.482725	0	0.726097	NaN	0	0	NaN	Q52LA3	52	Q52LA3	Q52LA3	Protein lin-52 homolog	LIN52	PGVAEFAASFKSPITSSPPKWMAEIERDDID	sp|Q52LA3|LIN52_HUMAN Protein lin-52 homolog OS=Homo sapiens OX=9606 GN=LIN52 PE=1 SV=1	1	3285	0	NaN	NaN	NaN	NaN	NaN	NaN	NaN	NaN	NaN	NaN	NaN	NaN	NaN	NaN	NaN	NaN	NaN
UID14609	S	3	___1	TPKPLS(1)LK	0.999877	0.00427501	79.82	39.231	79.82	0.13864	113260000	996	0	NaN	0	NaN	NaN	0.999877	NaN	NaN	0.989685	Q52LW3	996	Q52LW3	Q52LW3	Rho GTPase-activating protein 29	ARHGAP29	SASQKIEDGKTPKPLSLKSDRSTNNVERHTP	sp|Q52LW3|RHG29_HUMAN Rho GTPase-activating protein 29 OS=Homo sapiens OX=9606 GN=ARHGAP29 PE=1 SV=2	1	3288	0	NaN	NaN	NaN	NaN	NaN	NaN	NaN	NaN	NaN	NaN	NaN	NaN	NaN	NaN	NaN	NaN	NaN
UID14660	S	4	___1	S(1)KDKLDQVSSEIK	1	2.35e-16	142.88	110.84	142.88	-0.012912	38536000	83	NaN	NaN	NaN	0.999783	1	NaN	NaN	NaN	NaN	Q53GQ0	83	Q53GQ0	Q53GQ0	Very-long-chain 3-oxoacyl-CoA reductase	HSD17B12	EELAKHGMKVVLISRSKDKLDQVSSEIKEKF	sp|Q53GQ0|DHB12_HUMAN Very-long-chain 3-oxoacyl-CoA reductase OS=Homo sapiens OX=9606 GN=HSD17B12 PE=1 SV=2	1	3302	0	NaN	NaN	NaN	NaN	NaN	NaN	NaN	NaN	NaN	NaN	NaN	NaN	NaN	NaN	NaN	NaN	NaN
UID14691	S	3	___1	AGSLQLSSMS(0.002)AGNS(0.204)S(0.794)LRR	0.793845	0.000198031	76.889	60.899	76.889	-0.096219	1024100000	356	0	NaN	0	0.427843	0	0.793845	0	0	0	Q53SF7;Q53SF7-3;Q53SF7-2	356;356;394	Q53SF7	Q53SF7	Cordon-bleu protein-like 1	COBLL1	RAGSLQLSSMSAGNSSLRRTKRKAPSPPSKI	sp|Q53SF7|COBL1_HUMAN Cordon-bleu protein-like 1 OS=Homo sapiens OX=9606 GN=COBLL1 PE=1 SV=3;sp|Q53SF7-3|COBL1_HUMAN Isoform 3 of Cordon-bleu protein-like 1 OS=Homo sapiens OX=9606 GN=COBLL1;sp|Q53SF7-2|COBL1_HUMAN Isoform 2 of Cordon-bleu protein-like 1 O	1	3314	0	NaN	NaN	NaN	NaN	NaN	NaN	NaN	NaN	NaN	NaN	NaN	NaN	NaN	NaN	NaN	NaN	NaN
UID14708	S	4	___1	S(0.056)NT(0.25)IS(0.694)KPYISNTLPSDAPK	0.693805	1.71e-43	172.42	150.61	172.42	-0.19122	217510000	277	0	NaN	NaN	NaN	0.693805	0.461765	0	NaN	NaN	Q53SF7;Q53SF7-3;Q53SF7-2	277;277;315	Q53SF7	Q53SF7	Cordon-bleu protein-like 1	COBLL1	LVNKHRPTFTRSNTISKPYISNTLPSDAPKK	sp|Q53SF7|COBL1_HUMAN Cordon-bleu protein-like 1 OS=Homo sapiens OX=9606 GN=COBLL1 PE=1 SV=3;sp|Q53SF7-3|COBL1_HUMAN Isoform 3 of Cordon-bleu protein-like 1 OS=Homo sapiens OX=9606 GN=COBLL1;sp|Q53SF7-2|COBL1_HUMAN Isoform 2 of Cordon-bleu protein-like 1 O	1	3314	0	NaN	NaN	NaN	NaN	NaN	NaN	NaN	NaN	NaN	NaN	NaN	NaN	NaN	NaN	NaN	NaN	NaN
UID14727	S	3	___1	EGLVPLS(0.001)VS(0.8)S(0.2)GK	0.799708	2.09e-06	116.58	96.246	116.58	-0.011979	12316000	1165	0	NaN	NaN	NaN	NaN	0.799708	NaN	NaN	NaN	Q562F6;Q562F6-2	1165;1165	Q562F6	Q562F6	Shugoshin-like 2	SGOL2	SSFDSVREGLVPLSVSSGKNVIIKENFALEC	sp|Q562F6|SGO2_HUMAN Shugoshin 2 OS=Homo sapiens OX=9606 GN=SGO2 PE=1 SV=2;sp|Q562F6-2|SGO2_HUMAN Isoform 2 of Shugoshin 2 OS=Homo sapiens OX=9606 GN=SGO2	1	3320	0	NaN	NaN	NaN	NaN	NaN	NaN	NaN	NaN	NaN	NaN	NaN	NaN	NaN	NaN	NaN	NaN	NaN
UID14779	S	2	___1	LGAQAS(1)PGSR	0.999663	0.00149229	87.216	66.217	87.216	-0.11244	142930000	386	0.984543	0.999663	NaN	NaN	0.993244	0.988063	0.986529	0	0	Q5D1E8	386	Q5D1E8	Q5D1E8	Ribonuclease ZC3H12A	ZC3H12A	SEQCSLDGKKLGAQASPGSRQEGLTQTYAPS	sp|Q5D1E8|ZC12A_HUMAN Endoribonuclease ZC3H12A OS=Homo sapiens OX=9606 GN=ZC3H12A PE=1 SV=1	1	3339	0	NaN	NaN	NaN	NaN	NaN	NaN	NaN	NaN	NaN	NaN	NaN	NaN	NaN	NaN	NaN	NaN	NaN
UID14803	S	3	___1	TILALEY(0.055)S(0.536)S(0.367)PAT(0.042)PR	0.536034	0.000420946	77.912	65.144	77.912	-0.039772	11852000	554	NaN	NaN	NaN	NaN	NaN	0.536034	NaN	NaN	0	Q5GH72	554	Q5GH72	Q5GH72	XK-related protein 7	XKR7	FIDRRLRKTILALEYSSPATPRLQYRSVGTS	sp|Q5GH72|XKR7_HUMAN XK-related protein 7 OS=Homo sapiens OX=9606 GN=XKR7 PE=2 SV=1	1	3346	0	NaN	NaN	NaN	NaN	NaN	NaN	NaN	NaN	NaN	NaN	NaN	NaN	NaN	NaN	NaN	NaN	NaN
UID14805	S	3	___1	CLPGVLAS(1)PELR	1	0.000104115	94.339	78.677	52.112	3.9678	27827000	496	NaN	NaN	1	NaN	1	1	NaN	NaN	1	Q5H9F3-3;Q5H9F3-2;Q5H9F3	496;496;496	Q5H9F3-3	Q5H9F3-3	BCL-6 corepressor-like protein 1	BCORL1	LPSYLQDRCLPGVLASPELRSYPYAFSVARP	sp|Q5H9F3-3|BCORL_HUMAN Isoform 3 of BCL-6 corepressor-like protein 1 OS=Homo sapiens OX=9606 GN=BCORL1;sp|Q5H9F3-2|BCORL_HUMAN Isoform 2 of BCL-6 corepressor-like protein 1 OS=Homo sapiens OX=9606 GN=BCORL1;sp|Q5H9F3|BCORL_HUMAN BCL-6 corepressor-like pro	1	3348	0	NaN	NaN	NaN	NaN	NaN	NaN	NaN	NaN	NaN	NaN	NaN	NaN	NaN	NaN	NaN	NaN	NaN
UID14806	S	3	___1	EMAS(0.999)PPECS(0.001)EMPLDLSSK	0.999471	0.000133939	80.156	66.999	80.156	0.10188	82198000	613	NaN	NaN	NaN	NaN	NaN	0.999471	NaN	0.998026	0.998897	Q5H9F3-3;Q5H9F3-2;Q5H9F3	613;613;613	Q5H9F3-3	Q5H9F3-3	BCL-6 corepressor-like protein 1	BCORL1	FSPLKSPPQLEREMASPPECSEMPLDLSSKS	sp|Q5H9F3-3|BCORL_HUMAN Isoform 3 of BCL-6 corepressor-like protein 1 OS=Homo sapiens OX=9606 GN=BCORL1;sp|Q5H9F3-2|BCORL_HUMAN Isoform 2 of BCL-6 corepressor-like protein 1 OS=Homo sapiens OX=9606 GN=BCORL1;sp|Q5H9F3|BCORL_HUMAN BCL-6 corepressor-like pro	1	3348	0	NaN	NaN	NaN	NaN	NaN	NaN	NaN	NaN	NaN	NaN	NaN	NaN	NaN	NaN	NaN	NaN	NaN
UID14840	S	4	___1	S(0.058)VS(0.441)S(0.5)ENPTYPSAPLKPVTVPPR	0.500138	2.63e-15	100.93	86.912	91.175	0.14174	21910000	151	0.470823	NaN	NaN	NaN	0.500138	NaN	NaN	NaN	0	Q5HYK7-3;Q5HYK7-2;Q5HYK7	151;151;151	Q5HYK7-3	Q5HYK7-3	SH3 domain-containing protein 19	SH3D19	PTPAPRPLLLKKSVSSENPTYPSAPLKPVTV	sp|Q5HYK7-3|SH319_HUMAN Isoform 3 of SH3 domain-containing protein 19 OS=Homo sapiens OX=9606 GN=SH3D19;sp|Q5HYK7-2|SH319_HUMAN Isoform 2 of SH3 domain-containing protein 19 OS=Homo sapiens OX=9606 GN=SH3D19;sp|Q5HYK7|SH319_HUMAN SH3 domain-containing prot	1	3355	0	NaN	NaN	NaN	NaN	NaN	NaN	NaN	NaN	NaN	NaN	NaN	NaN	NaN	NaN	NaN	NaN	NaN
UID14843	S	4	___1	S(0.992)PQCS(0.008)APASASASVTLAQLLQLVQQGQELPGLEK	0.992358	1.1e-74	176.18	163.69	176.18	0.1603	38521000	6	NaN	NaN	NaN	NaN	0.992358	NaN	NaN	NaN	NaN	Q5I0X4	6	Q5I0X4	Q5I0X4	Uncharacterized protein C6orf226	C6orf226	__________MERPRSPQCSAPASASASVTL	sp|Q5I0X4|CF226_HUMAN Uncharacterized protein C6orf226 OS=Homo sapiens OX=9606 GN=C6orf226 PE=1 SV=1	1	3358	0	NaN	NaN	NaN	NaN	NaN	NaN	NaN	NaN	NaN	NaN	NaN	NaN	NaN	NaN	NaN	NaN	NaN
UID14942	S	3	___1	FYQGLPWGVS(0.266)S(0.734)LPR	0.733586	0.00157762	69.289	43.571	69.289	0.54892	68066000	868	NaN	0	NaN	NaN	0.499995	0.733586	NaN	0	0	Q5JTC6	868	Q5JTC6	Q5JTC6	APC membrane recruitment protein 1	AMER1	NYHSRFYQGLPWGVSSLPRYLGLPGLHPRPP	sp|Q5JTC6|AMER1_HUMAN APC membrane recruitment protein 1 OS=Homo sapiens OX=9606 GN=AMER1 PE=1 SV=2	1	3370	0	NaN	NaN	NaN	NaN	NaN	NaN	NaN	NaN	NaN	NaN	NaN	NaN	NaN	NaN	NaN	NaN	NaN
UID14975	S	3	___1	LQMAS(1)PEEK	1	0.00139754	82.543	39.031	73.881	-0.14207	129480000	45	1	NaN	0	1	1	1	1	0	NaN	Q5JVF3-3;Q5JVF3-2;Q5JVF3;Q5JVF3-4	45;43;45;45	Q5JVF3-3	Q5JVF3-3	PCI domain-containing protein 2	PCID2	SFKHPHVANPRLQMASPEEKCQQVLEPPYDE	sp|Q5JVF3-3|PCID2_HUMAN Isoform 3 of PCI domain-containing protein 2 OS=Homo sapiens OX=9606 GN=PCID2;sp|Q5JVF3-2|PCID2_HUMAN Isoform 2 of PCI domain-containing protein 2 OS=Homo sapiens OX=9606 GN=PCID2;sp|Q5JVF3|PCID2_HUMAN PCI domain-containing protein	1	3378	0	NaN	NaN	NaN	NaN	NaN	NaN	NaN	NaN	NaN	NaN	NaN	NaN	NaN	NaN	NaN	NaN	NaN
UID15078	S	4	___1	GEPENEEKEENKS(0.932)S(0.068)EETK	0.932006	1.27e-72	210.36	178.54	210.36	0.022885	281160000	110	NaN	NaN	NaN	NaN	0.886765	0.932006	NaN	NaN	NaN	Q5SSJ5;Q5SSJ5-2;Q5SSJ5-5	110;72;110	Q5SSJ5	Q5SSJ5	Heterochromatin protein 1-binding protein 3	HP1BP3	QPKGEPENEEKEENKSSEETKKDEKDQSKEK	sp|Q5SSJ5|HP1B3_HUMAN Heterochromatin protein 1-binding protein 3 OS=Homo sapiens OX=9606 GN=HP1BP3 PE=1 SV=1;sp|Q5SSJ5-2|HP1B3_HUMAN Isoform 2 of Heterochromatin protein 1-binding protein 3 OS=Homo sapiens OX=9606 GN=HP1BP3;sp|Q5SSJ5-5|HP1B3_HUMAN Isoform	1	3400	0	NaN	NaN	NaN	NaN	NaN	NaN	NaN	NaN	NaN	NaN	NaN	NaN	NaN	NaN	NaN	NaN	NaN
UID15101	S	3	___1	IRANS(0.043)IS(0.957)R	0.95742	0.0022412	96.957	65.526	96.957	0.18416	63469000	1207	0	NaN	0	NaN	0	0.95742	NaN	NaN	NaN	Q5SW79;Q5SW79-3;Q5SW79-2	1207;1109;1109	Q5SW79	Q5SW79	Centrosomal protein of 170 kDa	CEP170	VPSDKFSPRIRANSISRLSDSKVKSMTSAHG	sp|Q5SW79|CE170_HUMAN Centrosomal protein of 170 kDa OS=Homo sapiens OX=9606 GN=CEP170 PE=1 SV=1;sp|Q5SW79-3|CE170_HUMAN Isoform 3 of Centrosomal protein of 170 kDa OS=Homo sapiens OX=9606 GN=CEP170;sp|Q5SW79-2|CE170_HUMAN Isoform 2 of Centrosomal protein	1	3402	0	NaN	NaN	NaN	NaN	NaN	NaN	NaN	NaN	NaN	NaN	NaN	NaN	NaN	NaN	NaN	NaN	NaN
UID15140	S	4	___1	MEPKPQKS(1)PGK	1	1.09e-06	87.083	74.127	84.753	0.062934	74057000	8	NaN	NaN	NaN	NaN	1	NaN	NaN	1	NaN	Q5SXH7-4	8	Q5SXH7-4	Q5SXH7-4	Pleckstrin homology domain-containing family S member 1	PLEKHS1	________MEPKPQKSPGKQFTFSYENEVCK	sp|Q5SXH7-4|PKHS1_HUMAN Isoform 4 of Pleckstrin homology domain-containing family S member 1 OS=Homo sapiens OX=9606 GN=PLEKHS1	1	3405	0	NaN	NaN	NaN	NaN	NaN	NaN	NaN	NaN	NaN	NaN	NaN	NaN	NaN	NaN	NaN	NaN	NaN
UID15179	S	3	___1	VIS(0.457)PS(0.526)S(0.017)GYSSQSNTPTALTPVPVFLK	0.525763	4.72e-11	95.823	77.039	95.823	-0.79641	20764000	849	0.461547	0	NaN	NaN	NaN	0.525763	0.408141	NaN	0	Q5SYE7-2;Q5SYE7	849;853	Q5SYE7-2	Q5SYE7-2	NHS-like protein 1	NHSL1	PKIMSPEKSHRVISPSSGYSSQSNTPTALTP	sp|Q5SYE7-2|NHSL1_HUMAN Isoform 2 of NHS-like protein 1 OS=Homo sapiens OX=9606 GN=NHSL1;sp|Q5SYE7|NHSL1_HUMAN NHS-like protein 1 OS=Homo sapiens OX=9606 GN=NHSL1 PE=1 SV=2	1	3409	0	NaN	NaN	NaN	NaN	NaN	NaN	NaN	NaN	NaN	NaN	NaN	NaN	NaN	NaN	NaN	NaN	NaN
UID15187	S	3	___1	GLGGAGGGS(0.038)S(0.96)PS(0.002)K	0.959573	0.000250267	85.457	58.859	72.321	0.61873	547560000	719	0.959573	0.929502	NaN	0.760313	NaN	0.956762	0.860382	NaN	NaN	Q5T011;Q5T011-5;Q5T011-4	719;719;719	Q5T011	Q5T011	Protein SZT2	SZT2	PKVKRKGLGGAGGGSSPSKSPPVLGPQQALS	sp|Q5T011|SZT2_HUMAN KICSTOR complex protein SZT2 OS=Homo sapiens OX=9606 GN=SZT2 PE=1 SV=3;sp|Q5T011-5|SZT2_HUMAN Isoform 3 of KICSTOR complex protein SZT2 OS=Homo sapiens OX=9606 GN=SZT2;sp|Q5T011-4|SZT2_HUMAN Isoform 2 of KICSTOR complex protein SZT2 OS	1	3411	0	NaN	NaN	NaN	NaN	NaN	NaN	NaN	NaN	NaN	NaN	NaN	NaN	NaN	NaN	NaN	NaN	NaN
UID15189	S	3	___1	SQEPIYS(0.001)EEAS(0.052)GPRS(0.923)PLDMVS(0.019)S(0.005)R	0.922837	0.000530068	65.558	46.348	65.558	0.18631	22781000	2136	NaN	NaN	NaN	NaN	0.922837	NaN	NaN	NaN	NaN	Q5T011;Q5T011-5	2136;2079	Q5T011	Q5T011	Protein SZT2	SZT2	RSQEPIYSEEASGPRSPLDMVSSRSSDAARP	sp|Q5T011|SZT2_HUMAN KICSTOR complex protein SZT2 OS=Homo sapiens OX=9606 GN=SZT2 PE=1 SV=3;sp|Q5T011-5|SZT2_HUMAN Isoform 3 of KICSTOR complex protein SZT2 OS=Homo sapiens OX=9606 GN=SZT2	1	3411	0	NaN	NaN	NaN	NaN	NaN	NaN	NaN	NaN	NaN	NaN	NaN	NaN	NaN	NaN	NaN	NaN	NaN
UID15209	S	3	___1	EVNS(0.001)CT(0.021)T(0.13)GS(0.817)S(0.031)NSTIIGSQGSETPK	0.817421	1.15e-40	163.09	142.44	129.72	0.44926	94882000	563	0.481905	0.404561	0.464373	0.365643	0.817421	0.58309	0.275274	0.468853	NaN	Q5T0W9	563	Q5T0W9	Q5T0W9	Protein FAM83B	FAM83B	PTLPEQKEVNSCTTGSSNSTIIGSQGSETPK	sp|Q5T0W9|FA83B_HUMAN Protein FAM83B OS=Homo sapiens OX=9606 GN=FAM83B PE=1 SV=1	1;2	3416	0	NaN	NaN	NaN	NaN	NaN	NaN	NaN	NaN	NaN	NaN	NaN	NaN	NaN	NaN	NaN	NaN	NaN
UID15227	S	3	___1	S(0.001)LLS(0.997)LT(0.002)PDKK	0.996671	0.000202496	101.6	74.997	89.231	0.42498	29878000	780	0	0	NaN	NaN	0	0.988956	NaN	0.996023	0.996671	Q5T0W9	780	Q5T0W9	Q5T0W9	Protein FAM83B	FAM83B	PSFLKKGSQKLRSLLSLTPDKKENLSKNKAP	sp|Q5T0W9|FA83B_HUMAN Protein FAM83B OS=Homo sapiens OX=9606 GN=FAM83B PE=1 SV=1	1	3416	0	NaN	NaN	NaN	NaN	NaN	NaN	NaN	NaN	NaN	NaN	NaN	NaN	NaN	NaN	NaN	NaN	NaN
UID15256	S	3	___1	S(0.09)FS(0.728)S(0.184)PPS(0.158)PS(0.84)NKR	0.840069	4.47e-06	101.61	82.776	50.305	-0.34514	4110600000	971	0.801771	NaN	0.499998	NaN	0.663766	0.840069	0	0	0.499918	Q5T0Z8	971	Q5T0Z8	Q5T0Z8	Uncharacterized protein C6orf132	C6orf132	QGHPLPKSFSSPPSPSNKREEEEEEFNFEVI	sp|Q5T0Z8|CF132_HUMAN Uncharacterized protein C6orf132 OS=Homo sapiens OX=9606 GN=C6orf132 PE=1 SV=4	1;2	3417	0	NaN	NaN	NaN	NaN	NaN	NaN	NaN	NaN	NaN	NaN	NaN	NaN	NaN	NaN	NaN	NaN	NaN
UID15265	S	3	___1	S(0.019)S(0.14)S(0.841)PALKPK	0.841448	0.000828479	96.229	65.34	96.229	0.19357	341310000	438	0.341603	NaN	NaN	NaN	NaN	0.841448	NaN	NaN	NaN	Q5T0Z8	438	Q5T0Z8	Q5T0Z8	Uncharacterized protein C6orf132	C6orf132	AAHPPAGFTKTPKSSSPALKPKPNPPSPENT	sp|Q5T0Z8|CF132_HUMAN Uncharacterized protein C6orf132 OS=Homo sapiens OX=9606 GN=C6orf132 PE=1 SV=4	1	3417	0	NaN	NaN	NaN	NaN	NaN	NaN	NaN	NaN	NaN	NaN	NaN	NaN	NaN	NaN	NaN	NaN	NaN
UID15268	S	3	___1	AQPEEEDEDEVS(1)MK	1	2.73e-06	114.96	102.2	114.96	0.019224	227160000	1195	NaN	1	NaN	NaN	1	1	NaN	0	NaN	Q5T1M5;Q5T1M5-2	1195;1185	Q5T1M5	Q5T1M5	FK506-binding protein 15	FKBP15	LRPKAQPEEEDEDEVSMKGRPPPTPLFGDDD	sp|Q5T1M5|FKB15_HUMAN FK506-binding protein 15 OS=Homo sapiens OX=9606 GN=FKBP15 PE=1 SV=2;sp|Q5T1M5-2|FKB15_HUMAN Isoform 2 of FK506-binding protein 15 OS=Homo sapiens OX=9606 GN=FKBP15	1	3418	0	NaN	NaN	NaN	NaN	NaN	NaN	NaN	NaN	NaN	NaN	NaN	NaN	NaN	NaN	NaN	NaN	NaN
UID15353	S	2	___1	S(0.015)LS(0.233)PS(0.736)HLT(0.016)EDR	0.736013	7.13e-05	107.97	59.17	107.97	-0.19922	229500000	879	0.478661	NaN	NaN	NaN	0.736013	0	NaN	0	NaN	Q5T200;Q5T200-2	879;879	Q5T200;Q5T200-2	Q5T200	Zinc finger CCCH domain-containing protein 13	ZC3H13	LSQVVRPQESRSLSPSHLTEDRQGRWKEEDR	sp|Q5T200|ZC3HD_HUMAN Zinc finger CCCH domain-containing protein 13 OS=Homo sapiens OX=9606 GN=ZC3H13 PE=1 SV=1;sp|Q5T200-2|ZC3HD_HUMAN Isoform 2 of Zinc finger CCCH domain-containing protein 13 OS=Homo sapiens OX=9606 GN=ZC3H13	1;2	3421;3422	0	NaN	NaN	NaN	NaN	NaN	NaN	NaN	NaN	NaN	NaN	NaN	NaN	NaN	NaN	NaN	NaN	NaN
UID15425	S	4	___1	GDAPVDKVELS(0.004)EDS(0.996)PNS(1)EQDLEK	0.999667	5.12e-22	142.31	123.91	85.932	0.14209	128200000	1033	NaN	0	0.999667	NaN	0.992194	NaN	NaN	NaN	NaN	Q5T5P2;Q5T5P2-3;Q5T5P2-9;Q5T5P2-2;Q5T5P2-7;Q5T5P2-4;Q5T5P2-8;Q5T5P2-6	1033;716;953;1033;998;716;716;716	Q5T5P2	Q5T5P2	Sickle tail protein homolog	KIAA1217	DAPVDKVELSEDSPNSEQDLEKLGGKSPPPP	sp|Q5T5P2|SKT_HUMAN Sickle tail protein homolog OS=Homo sapiens OX=9606 GN=KIAA1217 PE=1 SV=2;sp|Q5T5P2-3|SKT_HUMAN Isoform 3 of Sickle tail protein homolog OS=Homo sapiens OX=9606 GN=KIAA1217;sp|Q5T5P2-9|SKT_HUMAN Isoform 9 of Sickle tail protein homolog	1;2	3432	0	NaN	NaN	NaN	NaN	NaN	NaN	NaN	NaN	NaN	NaN	NaN	NaN	NaN	NaN	NaN	NaN	NaN
UID15436	S	3	___1	SAAGLS(0.047)S(0.953)LVDLGPPLMEK	0.952977	6.99e-06	108.13	91.447	84.946	-0.35764	52048000	532	NaN	0	NaN	0.952977	0.848572	NaN	NaN	0	0	Q5T5P2;Q5T5P2-3;Q5T5P2-9;Q5T5P2-2;Q5T5P2-7;Q5T5P2-4;Q5T5P2-8;Q5T5P2-6;Q5T5P2-10	532;250;452;532;532;250;250;250;532	Q5T5P2;Q5T5P2-10	Q5T5P2	Sickle tail protein homolog	KIAA1217	TLVYIEKPRSAAGLSSLVDLGPPLMEKQVFA	sp|Q5T5P2|SKT_HUMAN Sickle tail protein homolog OS=Homo sapiens OX=9606 GN=KIAA1217 PE=1 SV=2;sp|Q5T5P2-3|SKT_HUMAN Isoform 3 of Sickle tail protein homolog OS=Homo sapiens OX=9606 GN=KIAA1217;sp|Q5T5P2-9|SKT_HUMAN Isoform 9 of Sickle tail protein homolog	1	3432;3433	0	NaN	NaN	NaN	NaN	NaN	NaN	NaN	NaN	NaN	NaN	NaN	NaN	NaN	NaN	NaN	NaN	NaN
UID15447	S	3	___1	DS(0.272)S(0.201)S(0.526)EVFSDAAK	0.52643	3.91e-05	103.85	68.149	101.45	1.1165	23303000	926	NaN	0.333333	NaN	0.4897	NaN	0.52643	0.447435	0	NaN	Q5T5U3;Q5T5U3-3	926;916	Q5T5U3	Q5T5U3	Rho GTPase-activating protein 21	ARHGAP21	SQKSSEDSGSRKDSSSEVFSDAAKEGWLHFR	sp|Q5T5U3|RHG21_HUMAN Rho GTPase-activating protein 21 OS=Homo sapiens OX=9606 GN=ARHGAP21 PE=1 SV=2;sp|Q5T5U3-3|RHG21_HUMAN Isoform 3 of Rho GTPase-activating protein 21 OS=Homo sapiens OX=9606 GN=ARHGAP21	1	3434	0	NaN	NaN	NaN	NaN	NaN	NaN	NaN	NaN	NaN	NaN	NaN	NaN	NaN	NaN	NaN	NaN	NaN
UID15504	S	3	___1	VS(0.008)LPS(0.528)S(0.464)PVPASPASSSGADQR	0.527806	4.13e-05	75.896	60.503	72.644	-0.48077	62501000	160	NaN	0.522353	NaN	0.522171	NaN	0.527806	0	NaN	NaN	Q5T6S3-2	160	Q5T6S3-2	Q5T6S3-2			CRRCIFALAVRVSLPSSPVPASPASSSGADQ	sp|Q5T6S3-2|PHF19_HUMAN Isoform 2 of PHD finger protein 19 OS=Homo sapiens OX=9606 GN=PHF19	1	3439	0	NaN	NaN	NaN	NaN	NaN	NaN	NaN	NaN	NaN	NaN	NaN	NaN	NaN	NaN	NaN	NaN	NaN
UID15553	S	3	___1	TDLANGSLSSSPEEMS(1)GAEEGR	0.999891	3.45e-13	123.21	113.29	123.21	0.19408	63785000	27	NaN	NaN	NaN	NaN	NaN	0.999891	NaN	NaN	0	Q5TAQ9-2;Q5TAQ9	27;27	Q5TAQ9-2	Q5TAQ9-2	DDB1- and CUL4-associated factor 8	DCAF8	TDLANGSLSSSPEEMSGAEEGRETSSGIEVE	sp|Q5TAQ9-2|DCAF8_HUMAN Isoform 2 of DDB1- and CUL4-associated factor 8 OS=Homo sapiens OX=9606 GN=DCAF8;sp|Q5TAQ9|DCAF8_HUMAN DDB1- and CUL4-associated factor 8 OS=Homo sapiens OX=9606 GN=DCAF8 PE=1 SV=1	1	3455	0	NaN	NaN	NaN	NaN	NaN	NaN	NaN	NaN	NaN	NaN	NaN	NaN	NaN	NaN	NaN	NaN	NaN
UID15559	S	3	___1	S(0.017)EKVPS(0.802)S(0.181)PAEAEK	0.802181	0.00018645	101.71	80.81	44.734	0.2793	320180000	155	0	NaN	0.802181	NaN	0.588241	0.5	0	0.5	NaN	Q5TAX3;Q5TAX3-2	155;155	Q5TAX3	Q5TAX3	Terminal uridylyltransferase 4	ZCCHC11	AEKASSYQMKSEKVPSSPAEAEKGPSLLLKD	sp|Q5TAX3|TUT4_HUMAN Terminal uridylyltransferase 4 OS=Homo sapiens OX=9606 GN=TUT4 PE=1 SV=3;sp|Q5TAX3-2|TUT4_HUMAN Isoform 2 of Terminal uridylyltransferase 4 OS=Homo sapiens OX=9606 GN=TUT4	1	3456	0	NaN	NaN	NaN	NaN	NaN	NaN	NaN	NaN	NaN	NaN	NaN	NaN	NaN	NaN	NaN	NaN	NaN
UID15560	S	2	___1	VPS(0.062)S(0.938)PAEAEK	0.938125	0.00018645	101.71	80.81	78.096	-0.022181	224560000	156	0	NaN	0.92992	NaN	NaN	0.5	0	0.879443	0.938125	Q5TAX3;Q5TAX3-2	156;156	Q5TAX3	Q5TAX3	Terminal uridylyltransferase 4	ZCCHC11	EKASSYQMKSEKVPSSPAEAEKGPSLLLKDM	sp|Q5TAX3|TUT4_HUMAN Terminal uridylyltransferase 4 OS=Homo sapiens OX=9606 GN=TUT4 PE=1 SV=3;sp|Q5TAX3-2|TUT4_HUMAN Isoform 2 of Terminal uridylyltransferase 4 OS=Homo sapiens OX=9606 GN=TUT4	1	3456	0	NaN	NaN	NaN	NaN	NaN	NaN	NaN	NaN	NaN	NaN	NaN	NaN	NaN	NaN	NaN	NaN	NaN
UID15588	S	3	___1	GFGFAIADS(0.991)PT(0.009)GQK	0.991388	2.13e-05	101.75	87.847	78.69	0.36113	49941000	595	NaN	NaN	NaN	0.991388	NaN	0.987073	NaN	NaN	NaN	Q5TCQ9;Q5TCQ9-1;Q5TCQ9-3;Q5TCQ9-2	595;620;595;620	Q5TCQ9	Q5TCQ9	Membrane-associated guanylate kinase, WW and PDZ domain-containing protein 3	MAGI3	PLIKGPKGFGFAIADSPTGQKVKMILDSQWC	sp|Q5TCQ9|MAGI3_HUMAN Membrane-associated guanylate kinase, WW and PDZ domain-containing protein 3 OS=Homo sapiens OX=9606 GN=MAGI3 PE=1 SV=3;sp|Q5TCQ9-1|MAGI3_HUMAN Isoform 4 of Membrane-associated guanylate kinase, WW and PDZ domain-containing protein 3	1	3465	0	NaN	NaN	NaN	NaN	NaN	NaN	NaN	NaN	NaN	NaN	NaN	NaN	NaN	NaN	NaN	NaN	NaN
UID15597	S	3	___1	IRPLS(0.998)DGNS(0.975)PWS(0.013)T(0.014)ILIK	0.975043	9.4e-43	173.56	103.82	61.222	-0.2759	134670000	618	0.807657	NaN	0.810746	0.68056	0.975043	0	0	NaN	NaN	Q5TCX8;Q5TCX8-3	618;64	Q5TCX8	Q5TCX8	Mitogen-activated protein kinase kinase kinase MLK4	MLK4	RTDCKERIRPLSDGNSPWSTILIKNQKTMPL	sp|Q5TCX8|M3K21_HUMAN Mitogen-activated protein kinase kinase kinase 21 OS=Homo sapiens OX=9606 GN=MAP3K21 PE=1 SV=3;sp|Q5TCX8-3|M3K21_HUMAN Isoform 3 of Mitogen-activated protein kinase kinase kinase 21 OS=Homo sapiens OX=9606 GN=MAP3K21	1;2	3466	0	NaN	NaN	NaN	NaN	NaN	NaN	NaN	NaN	NaN	NaN	NaN	NaN	NaN	NaN	NaN	NaN	NaN
UID15606	S	3	___1	SLNS(0.002)S(0.007)S(0.03)S(0.282)S(0.633)PPS(0.018)S(0.023)PT(0.005)MMPR	0.633376	0.00074173	57.293	44.415	57.293	3.4145	42465000	543	NaN	NaN	0	0.633376	0.473559	0.600132	NaN	NaN	0.446967	Q5TCX8;Q5TCX8-2	543;543	Q5TCX8	Q5TCX8	Mitogen-activated protein kinase kinase kinase MLK4	MLK4	SPNLDKRRSLNSSSSSPPSSPTMMPRLRAIQ	sp|Q5TCX8|M3K21_HUMAN Mitogen-activated protein kinase kinase kinase 21 OS=Homo sapiens OX=9606 GN=MAP3K21 PE=1 SV=3;sp|Q5TCX8-2|M3K21_HUMAN Isoform 2 of Mitogen-activated protein kinase kinase kinase 21 OS=Homo sapiens OX=9606 GN=MAP3K21	1;2	3466	0	NaN	NaN	NaN	NaN	NaN	NaN	NaN	NaN	NaN	NaN	NaN	NaN	NaN	NaN	NaN	NaN	NaN
UID15643	S	3	___1	S(1)GLAMDPASGAK	0.99987	0.00536751	59.607	32.509	59.607	-2.0135	148110000	199	0.999614	NaN	NaN	0.99941	0.998626	0.999418	0.99987	NaN	0.999245	Q5TFG8	199	Q5TFG8	Q5TFG8	Zinc finger C2HC domain-containing protein 1B	ZC2HC1B	LQNRVLVATNEVPTKSGLAMDPASGAKLRQG	sp|Q5TFG8|ZC21B_HUMAN Zinc finger C2HC domain-containing protein 1B OS=Homo sapiens OX=9606 GN=ZC2HC1B PE=2 SV=2	1	3472	0	NaN	NaN	NaN	NaN	NaN	NaN	NaN	NaN	NaN	NaN	NaN	NaN	NaN	NaN	NaN	NaN	NaN
UID15665	S	3	___1	ET(0.02)PS(0.98)EDDRSQSR	0.980469	0.00161175	74.296	45.32	74.296	0.00664	12245000	1962	NaN	NaN	NaN	NaN	0.980469	NaN	NaN	NaN	0	Q5TH69	1962	Q5TH69	Q5TH69	Brefeldin A-inhibited guanine nucleotide-exchange protein 3	ARFGEF3	SSTPSTGGFSGKETPSEDDRSQSREHMGESL	sp|Q5TH69|BIG3_HUMAN Brefeldin A-inhibited guanine nucleotide-exchange protein 3 OS=Homo sapiens OX=9606 GN=ARFGEF3 PE=1 SV=3	1	3476	0	NaN	NaN	NaN	NaN	NaN	NaN	NaN	NaN	NaN	NaN	NaN	NaN	NaN	NaN	NaN	NaN	NaN
UID15702	S	4	___1	SIVSLMPEDQIS(1)PVSEVLKPK	0.999739	7.55e-47	180.37	159.71	169.42	0.12683	103920000	582	0.994126	0	NaN	0.999739	NaN	0.992386	0.996641	NaN	0.993104	Q5THK1-2;Q5THK1-4;Q5THK1;Q5THK1-3	582;582;582;582	Q5THK1-2	Q5THK1-2	Protein PRR14L	PRR14L	FERKSIVSLMPEDQISPVSEVLKPKQGTALL	sp|Q5THK1-2|PR14L_HUMAN Isoform 2 of Protein PRR14L OS=Homo sapiens OX=9606 GN=PRR14L;sp|Q5THK1-4|PR14L_HUMAN Isoform 4 of Protein PRR14L OS=Homo sapiens OX=9606 GN=PRR14L;sp|Q5THK1|PR14L_HUMAN Protein PRR14L OS=Homo sapiens OX=9606 GN=PRR14L PE=1 SV=1;sp|	1	3478	0	NaN	NaN	NaN	NaN	NaN	NaN	NaN	NaN	NaN	NaN	NaN	NaN	NaN	NaN	NaN	NaN	NaN
UID15758	S	2	___1	SQEDEIS(0.977)S(0.023)PVNK	0.976946	1.17e-56	228.38	171.36	228.38	-0.32004	171720000	2195	0	NaN	0.553605	0	0.620684	0.976946	NaN	0	0	Q5UIP0;Q5UIP0-2	2195;2195	Q5UIP0	Q5UIP0	Telomere-associated protein RIF1	RIF1	SILKRGLKRSQEDEISSPVNKVRRVSFADPI	sp|Q5UIP0|RIF1_HUMAN Telomere-associated protein RIF1 OS=Homo sapiens OX=9606 GN=RIF1 PE=1 SV=2;sp|Q5UIP0-2|RIF1_HUMAN Isoform 2 of Telomere-associated protein RIF1 OS=Homo sapiens OX=9606 GN=RIF1	1	3488	0	NaN	NaN	NaN	NaN	NaN	NaN	NaN	NaN	NaN	NaN	NaN	NaN	NaN	NaN	NaN	NaN	NaN
UID15772	S	4	___1	SSLSNNECGS(0.004)LDKT(0.422)S(0.573)PEMSNSNNDER	0.573166	7.01e-22	112.48	105.36	110.47	0.86704	139280000	1162	0.486603	0.483807	NaN	NaN	0.479961	0.573166	NaN	NaN	0.490708	Q5UIP0;Q5UIP0-2	1162;1162	Q5UIP0	Q5UIP0	Telomere-associated protein RIF1	RIF1	KSSLSNNECGSLDKTSPEMSNSNNDERKKAL	sp|Q5UIP0|RIF1_HUMAN Telomere-associated protein RIF1 OS=Homo sapiens OX=9606 GN=RIF1 PE=1 SV=2;sp|Q5UIP0-2|RIF1_HUMAN Isoform 2 of Telomere-associated protein RIF1 OS=Homo sapiens OX=9606 GN=RIF1	1	3488	0	NaN	NaN	NaN	NaN	NaN	NaN	NaN	NaN	NaN	NaN	NaN	NaN	NaN	NaN	NaN	NaN	NaN
UID15773	S	3	___1	TIGDLSTLT(0.005)AS(0.995)EIK	0.994874	1.09e-05	107.34	86.088	98.507	0.62252	97697000	2339	NaN	0	0.941612	NaN	0.994874	0.970352	0.94492	0.971846	0.966223	Q5UIP0;Q5UIP0-2	2339;2313	Q5UIP0	Q5UIP0	Telomere-associated protein RIF1	RIF1	AKNIKTIGDLSTLTASEIKTLPIRSPKVSNV	sp|Q5UIP0|RIF1_HUMAN Telomere-associated protein RIF1 OS=Homo sapiens OX=9606 GN=RIF1 PE=1 SV=2;sp|Q5UIP0-2|RIF1_HUMAN Isoform 2 of Telomere-associated protein RIF1 OS=Homo sapiens OX=9606 GN=RIF1	1	3488	0	NaN	NaN	NaN	NaN	NaN	NaN	NaN	NaN	NaN	NaN	NaN	NaN	NaN	NaN	NaN	NaN	NaN
UID15790	S	3	___1	GS(0.999)PHS(0.001)VINIFTK	0.999328	6.53e-46	216.07	192.83	163.8	0.37845	317590000	1061	0.994458	0.999268	0.993827	0.999117	0.60839	0.999328	0	NaN	0.969492	Q5VT06	1061	Q5VT06	Q5VT06	Centrosome-associated protein 350	CEP350	GGTQSKGPWEELAKGSPHSVINIFTKSYQLY	sp|Q5VT06|CE350_HUMAN Centrosome-associated protein 350 OS=Homo sapiens OX=9606 GN=CEP350 PE=1 SV=1	1	3493	0	NaN	NaN	NaN	NaN	NaN	NaN	NaN	NaN	NaN	NaN	NaN	NaN	NaN	NaN	NaN	NaN	NaN
UID15799	S	4	___1	S(1)KS(1)RS(1)ENNIK	1	0.0108429	62.258	13.411	52.555	1.5797	610620000	497	NaN	0	NaN	1	0.994871	NaN	1	NaN	1	Q5VT06	497	Q5VT06	Q5VT06	Centrosome-associated protein 350	CEP350	RHLQRNSERSRSKSRSENNIKKLASSLPDNK	sp|Q5VT06|CE350_HUMAN Centrosome-associated protein 350 OS=Homo sapiens OX=9606 GN=CEP350 PE=1 SV=1	1;3	3493	0	NaN	NaN	NaN	NaN	NaN	NaN	NaN	NaN	NaN	NaN	NaN	NaN	NaN	NaN	NaN	NaN	NaN
UID15849	S	3	___1	QPSDGMERPS(0.001)S(0.001)LMDS(0.554)S(0.445)QEK	0.553545	0.000784189	65.901	46.507	65.901	-0.45724	61085000	779	NaN	NaN	NaN	NaN	NaN	0.553545	NaN	NaN	NaN	Q5VT52-2;Q5VT52-3;Q5VT52;Q5VT52-5	779;790;816;790	Q5VT52-2;Q5VT52-5	Q5VT52-2	Regulation of nuclear pre-mRNA domain-containing protein 2	RPRD2	KQPSDGMERPSSLMDSSQEKFYPDTSFQEDE	sp|Q5VT52-2|RPRD2_HUMAN Isoform 2 of Regulation of nuclear pre-mRNA domain-containing protein 2 OS=Homo sapiens OX=9606 GN=RPRD2;sp|Q5VT52-3|RPRD2_HUMAN Isoform 3 of Regulation of nuclear pre-mRNA domain-containing protein 2 OS=Homo sapiens OX=9606 GN=RPRD	1	3495;3496	0	NaN	NaN	NaN	NaN	NaN	NaN	NaN	NaN	NaN	NaN	NaN	NaN	NaN	NaN	NaN	NaN	NaN
UID15857	S	4	___1	S(0.553)LFS(0.446)PQNTLAAPTGHPPTSGVEK	0.553273	8.58e-05	72.603	51.789	72.603	-0.13148	24964000	936	NaN	NaN	NaN	NaN	NaN	0.553273	NaN	NaN	NaN	Q5VT52-2;Q5VT52-3;Q5VT52	936;947;973	Q5VT52-2	Q5VT52-2	Regulation of nuclear pre-mRNA domain-containing protein 2	RPRD2	PQKQYPDSPHPVPHRSLFSPQNTLAAPTGHP	sp|Q5VT52-2|RPRD2_HUMAN Isoform 2 of Regulation of nuclear pre-mRNA domain-containing protein 2 OS=Homo sapiens OX=9606 GN=RPRD2;sp|Q5VT52-3|RPRD2_HUMAN Isoform 3 of Regulation of nuclear pre-mRNA domain-containing protein 2 OS=Homo sapiens OX=9606 GN=RPRD	1	3495	0	NaN	NaN	NaN	NaN	NaN	NaN	NaN	NaN	NaN	NaN	NaN	NaN	NaN	NaN	NaN	NaN	NaN
UID15911	S	2	___1	RAS(1)PS(1)PPR	1	0.00107444	90.306	52.75	40.589	-0.21233	5078000000	69	1	1	1	1	1	1	1	1	1	Q5VUA4;Q5VUA4-2	69;69	Q5VUA4	Q5VUA4	Zinc finger protein 318	ZNF318	ARRPRSPSGHRGRRASPSPPRGRRVSPSPPR	sp|Q5VUA4|ZN318_HUMAN Zinc finger protein 318 OS=Homo sapiens OX=9606 GN=ZNF318 PE=1 SV=2;sp|Q5VUA4-2|ZN318_HUMAN Isoform 2 of Zinc finger protein 318 OS=Homo sapiens OX=9606 GN=ZNF318	1;2	3505	0	NaN	NaN	NaN	NaN	NaN	NaN	NaN	NaN	NaN	NaN	NaN	NaN	NaN	NaN	NaN	NaN	NaN
UID15975	S	2	___1	S(0.82)AS(0.15)PS(0.03)SQGWQGR	0.820061	0.000818624	85.081	66.641	85.081	0.12361	86743000	1291	NaN	0.492743	NaN	NaN	0.739875	NaN	NaN	0.820061	NaN	Q5VV67-2;Q5VV67	1291;1411	Q5VV67-2	Q5VV67-2	Peroxisome proliferator-activated receptor gamma coactivator-related protein 1	PPRC1	SAKQRSMRCYRKACRSASPSSQGWQGRRGRN	sp|Q5VV67-2|PPRC1_HUMAN Isoform 2 of Peroxisome proliferator-activated receptor gamma coactivator-related protein 1 OS=Homo sapiens OX=9606 GN=PPRC1;sp|Q5VV67|PPRC1_HUMAN Peroxisome proliferator-activated receptor gamma coactivator-related protein 1 OS=Hom	1	3511	0	NaN	NaN	NaN	NaN	NaN	NaN	NaN	NaN	NaN	NaN	NaN	NaN	NaN	NaN	NaN	NaN	NaN
UID16013	S	3	___1	SSSHLS(0.998)PS(0.002)EEVR	0.997942	2.08e-08	125.47	99.486	125.47	-0.085398	159060000	1172	NaN	NaN	NaN	0	0.997942	0.887725	0.707265	0.964382	0.767008	Q5VWN6;Q5VWN6-2	1172;367	Q5VWN6	Q5VWN6	Protein FAM208B	FAM208B	MVMEALSLAKSSSHLSPSEEVRCTQDFLSQT	sp|Q5VWN6|TASO2_HUMAN Protein TASOR 2 OS=Homo sapiens OX=9606 GN=TASOR2 PE=1 SV=1;sp|Q5VWN6-2|TASO2_HUMAN Isoform 2 of Protein TASOR 2 OS=Homo sapiens OX=9606 GN=TASOR2	1	3518	0	NaN	NaN	NaN	NaN	NaN	NaN	NaN	NaN	NaN	NaN	NaN	NaN	NaN	NaN	NaN	NaN	NaN
UID16022	S	4	___1	LRS(1)KDELSQAEK	1	1.69e-11	141.11	119.56	141.11	-0.13845	263260000	1031	NaN	0.999993	NaN	NaN	1	NaN	NaN	0	0.999978	Q5VWQ8;Q5VWQ8-5;Q5VWQ8-2;Q5VWQ8-3;Q5VWQ8-4	1031;1003;907;838;907	Q5VWQ8	Q5VWQ8	Disabled homolog 2-interacting protein	DAB2IP	DEGLGPDPPHRDRLRSKDELSQAEKDLAVLQ	sp|Q5VWQ8|DAB2P_HUMAN Disabled homolog 2-interacting protein OS=Homo sapiens OX=9606 GN=DAB2IP PE=1 SV=2;sp|Q5VWQ8-5|DAB2P_HUMAN Isoform 5 of Disabled homolog 2-interacting protein OS=Homo sapiens OX=9606 GN=DAB2IP;sp|Q5VWQ8-2|DAB2P_HUMAN Isoform 2 of Disa	1	3520	0	NaN	NaN	NaN	NaN	NaN	NaN	NaN	NaN	NaN	NaN	NaN	NaN	NaN	NaN	NaN	NaN	NaN
UID16035	S	4	___1	KES(0.833)T(0.143)S(0.025)EQMPSFPEMVYYIQEK	0.832578	1e-27	155.05	136	155.05	0.41156	56277000	549	0.426771	NaN	NaN	0.332154	0.832578	NaN	NaN	0.32747	NaN	Q5VYK3	549	Q5VYK3	Q5VYK3	Proteasome-associated protein ECM29 homolog	ECM29	AQRVLRCLPGRNRKESTSEQMPSFPEMVYYI	sp|Q5VYK3|ECM29_HUMAN Proteasome adapter and scaffold protein ECM29 OS=Homo sapiens OX=9606 GN=ECPAS PE=1 SV=2	1	3522	0	NaN	NaN	NaN	NaN	NaN	NaN	NaN	NaN	NaN	NaN	NaN	NaN	NaN	NaN	NaN	NaN	NaN
UID16038	S	4	___1	VLLIESLATMEPDS(1)RPELQEK	0.999974	9.85e-16	130.65	112.11	86.551	1.5019	33624000	1826	NaN	NaN	NaN	NaN	0.999926	0.999974	NaN	NaN	0	Q5VYK3	1826	Q5VYK3	Q5VYK3	Proteasome-associated protein ECM29 homolog	ECM29	CRVLLIESLATMEPDSRPELQEKAALLKKTL	sp|Q5VYK3|ECM29_HUMAN Proteasome adapter and scaffold protein ECM29 OS=Homo sapiens OX=9606 GN=ECPAS PE=1 SV=2	1	3522	0	NaN	NaN	NaN	NaN	NaN	NaN	NaN	NaN	NaN	NaN	NaN	NaN	NaN	NaN	NaN	NaN	NaN
UID16063	S	4	___1	KS(0.126)S(0.843)T(0.031)GSISNVLFSTQDPVEDAVFGEATNLKK	0.842751	4.02e-182	248.83	238.11	248.83	0.080861	803170000	1049	0.495598	0.464009	0.57162	0.558023	0.842751	0.477841	0.494259	0.680757	0.688102	Q5VZ89-7;Q5VZ89-3;Q5VZ89;Q5VZ89-5	1049;1000;1000;1000	Q5VZ89-7	Q5VZ89-7	DENN domain-containing protein 4C	DENND4C	VKVPSGIFDVNSRKSSTGSISNVLFSTQDPV	sp|Q5VZ89-7|DEN4C_HUMAN Isoform 2 of DENN domain-containing protein 4C OS=Homo sapiens OX=9606 GN=DENND4C;sp|Q5VZ89-3|DEN4C_HUMAN Isoform 3 of DENN domain-containing protein 4C OS=Homo sapiens OX=9606 GN=DENND4C;sp|Q5VZ89|DEN4C_HUMAN DENN domain-containing	1;2;3	3525	0	NaN	NaN	NaN	NaN	NaN	NaN	NaN	NaN	NaN	NaN	NaN	NaN	NaN	NaN	NaN	NaN	NaN
UID16095	S	3	___1	T(0.114)S(0.886)LLHIAR	0.885829	0.000971117	93.111	65.782	93.111	4.3079	4666600	1139	NaN	NaN	NaN	0.885829	0.881006	0.798314	NaN	NaN	0.807027	Q5VZ89-7;Q5VZ89-3;Q5VZ89;Q5VZ89-5	1139;1090;1090;1090	Q5VZ89-7	Q5VZ89-7	DENN domain-containing protein 4C	DENND4C	ADAKILTAALTCPKTSLLHIARTHSFENVSC	sp|Q5VZ89-7|DEN4C_HUMAN Isoform 2 of DENN domain-containing protein 4C OS=Homo sapiens OX=9606 GN=DENND4C;sp|Q5VZ89-3|DEN4C_HUMAN Isoform 3 of DENN domain-containing protein 4C OS=Homo sapiens OX=9606 GN=DENND4C;sp|Q5VZ89|DEN4C_HUMAN DENN domain-containing	1	3525	0	NaN	NaN	NaN	NaN	NaN	NaN	NaN	NaN	NaN	NaN	NaN	NaN	NaN	NaN	NaN	NaN	NaN
UID16122	S	3	___1	S(0.661)NDS(0.339)GEEAEKEFIFV	0.660729	2.34e-06	118.52	94.142	103.1	0.24266	19934000	1357	0	NaN	NaN	NaN	NaN	0.660729	NaN	NaN	0.629897	Q5VZK9;Q5VZK9-2	1357;1312	Q5VZK9	Q5VZK9	Leucine-rich repeat-containing protein 16A	LRRC16A	QKQRSSSKDGHQGSKSNDSGEEAEKEFIFV_	sp|Q5VZK9|CARL1_HUMAN F-actin-uncapping protein LRRC16A OS=Homo sapiens OX=9606 GN=CARMIL1 PE=1 SV=1;sp|Q5VZK9-2|CARL1_HUMAN Isoform 2 of F-actin-uncapping protein LRRC16A OS=Homo sapiens OX=9606 GN=CARMIL1	1	3528	0	NaN	NaN	NaN	NaN	NaN	NaN	NaN	NaN	NaN	NaN	NaN	NaN	NaN	NaN	NaN	NaN	NaN
UID16139	S	3	___1	ENS(0.999)KET(0.001)FSGK	0.999146	0.00642522	64.394	51.413	64.394	-0.53102	604460000	162	NaN	NaN	0.987302	0.918347	0.999146	0	0	NaN	NaN	Q5VZL5-2;Q5VZL5-4;Q5VZL5	162;130;162	Q5VZL5-2	Q5VZL5-2	Zinc finger MYM-type protein 4	ZMYM4	VFKSIRKDFSLVRENSKETFSGKEKNRDLTY	sp|Q5VZL5-2|ZMYM4_HUMAN Isoform 2 of Zinc finger MYM-type protein 4 OS=Homo sapiens OX=9606 GN=ZMYM4;sp|Q5VZL5-4|ZMYM4_HUMAN Isoform 4 of Zinc finger MYM-type protein 4 OS=Homo sapiens OX=9606 GN=ZMYM4;sp|Q5VZL5|ZMYM4_HUMAN Zinc finger MYM-type protein 4 O	1	3529	0	NaN	NaN	NaN	NaN	NaN	NaN	NaN	NaN	NaN	NaN	NaN	NaN	NaN	NaN	NaN	NaN	NaN
UID16153	S	4	___1	S(0.74)S(0.78)QGS(0.48)EFLEEPDKLEEK	0.779692	9.71e-43	173.43	146.99	69.152	-0.22604	329600000	571	0.688175	0.779692	NaN	NaN	0.412448	0.567425	0.749933	0.509847	0	Q5W0B1	571	Q5W0B1	Q5W0B1	RING finger protein 219	RNF219	NNGFKSLDLDGLSKSSQGSEFLEEPDKLEEK	sp|Q5W0B1|OBI1_HUMAN ORC ubiquitin ligase 1 OS=Homo sapiens OX=9606 GN=OBI1 PE=1 SV=1	1;2	3530	0	NaN	NaN	NaN	NaN	NaN	NaN	NaN	NaN	NaN	NaN	NaN	NaN	NaN	NaN	NaN	NaN	NaN
UID16167	S	4	___1	S(0.437)GS(0.563)NQPFPIKPLSESK	0.563039	0.00187183	68.369	51.875	63.165	0.28813	100360000	317	NaN	NaN	0.525152	NaN	0	0.529053	NaN	0.563039	NaN	Q5W0Z9-3	317	Q5W0Z9-3	Q5W0Z9-3	Probable palmitoyltransferase ZDHHC20	ZDHHC20	EQASVTNQNEYARSGSNQPFPIKPLSESKNR	sp|Q5W0Z9-3|ZDH20_HUMAN Isoform 3 of Palmitoyltransferase ZDHHC20 OS=Homo sapiens OX=9606 GN=ZDHHC20	1	3534	0	NaN	NaN	NaN	NaN	NaN	NaN	NaN	NaN	NaN	NaN	NaN	NaN	NaN	NaN	NaN	NaN	NaN
UID16276	S	3	___1	VIYINS(1)PLPQK	0.999994	1.15e-05	113.65	74.627	113.65	0.0402	86987000	326	0	NaN	NaN	NaN	0	0.999994	0	NaN	NaN	Q659A1	326	Q659A1	Q659A1	Little elongation complex subunit 2	ICE2	IPVAGSKPVKVIYINSPLPQKKMTMRERNQI	sp|Q659A1|ICE2_HUMAN Little elongation complex subunit 2 OS=Homo sapiens OX=9606 GN=ICE2 PE=1 SV=2	1	3552	0	NaN	NaN	NaN	NaN	NaN	NaN	NaN	NaN	NaN	NaN	NaN	NaN	NaN	NaN	NaN	NaN	NaN
UID16293	S	4	___1	KLS(1)EMQDLEETMAK	0.999997	0.000342211	79.97	57.324	79.97	-0.13639	77125000	356	NaN	NaN	NaN	NaN	0.999996	0.999997	NaN	NaN	NaN	Q66GS9	356	Q66GS9	Q66GS9	Centrosomal protein of 135 kDa	CEP135	DKELGEAKKEIKRKLSEMQDLEETMAKLQLE	sp|Q66GS9|CP135_HUMAN Centrosomal protein of 135 kDa OS=Homo sapiens OX=9606 GN=CEP135 PE=1 SV=2	1	3554	0	NaN	NaN	NaN	NaN	NaN	NaN	NaN	NaN	NaN	NaN	NaN	NaN	NaN	NaN	NaN	NaN	NaN
UID16294	S	3	___1	ALLS(0.864)S(0.115)S(0.021)DDPPAEVDIFELLK	0.863739	3.53e-19	149.85	122.2	149.85	0.93857	8046700	752	NaN	NaN	NaN	NaN	0.863739	NaN	NaN	0.348805	NaN	Q66K14-2;Q66K14	752;752	Q66K14-2	Q66K14-2	TBC1 domain family member 9B	TBC1D9B	KQSVSPPIPHLRALLSSSDDPPAEVDIFELL	sp|Q66K14-2|TBC9B_HUMAN Isoform 2 of TBC1 domain family member 9B OS=Homo sapiens OX=9606 GN=TBC1D9B;sp|Q66K14|TBC9B_HUMAN TBC1 domain family member 9B OS=Homo sapiens OX=9606 GN=TBC1D9B PE=1 SV=3	1	3555	0	NaN	NaN	NaN	NaN	NaN	NaN	NaN	NaN	NaN	NaN	NaN	NaN	NaN	NaN	NaN	NaN	NaN
UID16302	S	3	___1	NS(1)PMEDLGAK	1	0.000767528	81.619	58.014	72.175	-0.10176	16230000	463	NaN	1	NaN	NaN	1	NaN	1	1	NaN	Q66K14-2;Q66K14	463;463	Q66K14-2	Q66K14-2	TBC1 domain family member 9B	TBC1D9B	APTASQGLLKLFQKNSPMEDLGAKGAKEKMK	sp|Q66K14-2|TBC9B_HUMAN Isoform 2 of TBC1 domain family member 9B OS=Homo sapiens OX=9606 GN=TBC1D9B;sp|Q66K14|TBC9B_HUMAN TBC1 domain family member 9B OS=Homo sapiens OX=9606 GN=TBC1D9B PE=1 SV=3	1	3555	0	NaN	NaN	NaN	NaN	NaN	NaN	NaN	NaN	NaN	NaN	NaN	NaN	NaN	NaN	NaN	NaN	NaN
UID16331	S	3	___1	KAS(0.74)T(0.26)APGAEASPSPCITER	0.740392	7.61e-13	135.06	114.63	135.06	0.031333	245860000	231	0.734755	0	NaN	0	0.740392	0	0	0	0	Q66PJ3	231	Q66PJ3	Q66PJ3	ADP-ribosylation factor-like protein 6-interacting protein 4	ARL6IP4	TSRNCSASTSQGRKASTAPGAEASPSPCITE	sp|Q66PJ3|AR6P4_HUMAN ADP-ribosylation factor-like protein 6-interacting protein 4 OS=Homo sapiens OX=9606 GN=ARL6IP4 PE=1 SV=2	1	3559	0	NaN	NaN	NaN	NaN	NaN	NaN	NaN	NaN	NaN	NaN	NaN	NaN	NaN	NaN	NaN	NaN	NaN
UID16380	S	3	___1	KPSVSAQMQAYGQS(0.058)S(0.536)Y(0.34)S(0.058)T(0.009)QTWVR	0.535687	7.75e-13	114.2	106.58	114.2	0.43655	15602000	583	NaN	NaN	0	0.394864	0.535687	NaN	NaN	NaN	0	Q68CZ2;Q68CZ2-2	583;343	Q68CZ2	Q68CZ2	Tensin-3	TNS3	RKPSVSAQMQAYGQSSYSTQTWVRQQQMVVA	sp|Q68CZ2|TENS3_HUMAN Tensin-3 OS=Homo sapiens OX=9606 GN=TNS3 PE=1 SV=2;sp|Q68CZ2-2|TENS3_HUMAN Isoform 2 of Tensin-3 OS=Homo sapiens OX=9606 GN=TNS3	1	3571	0	NaN	NaN	NaN	NaN	NaN	NaN	NaN	NaN	NaN	NaN	NaN	NaN	NaN	NaN	NaN	NaN	NaN
UID16385	S	2	___1	PT(0.002)GS(0.968)PLS(0.029)AEFSGTR	0.967929	5.75e-18	122.09	85.565	99.927	0.20168	69880000	969	NaN	NaN	0.442179	NaN	0.565759	0.967929	0.9464	NaN	NaN	Q68CZ2;Q68CZ2-2	969;729	Q68CZ2	Q68CZ2	Tensin-3	TNS3	PKPMVSLLGSGRPTGSPLSAEFSGTRKDSPV	sp|Q68CZ2|TENS3_HUMAN Tensin-3 OS=Homo sapiens OX=9606 GN=TNS3 PE=1 SV=2;sp|Q68CZ2-2|TENS3_HUMAN Isoform 2 of Tensin-3 OS=Homo sapiens OX=9606 GN=TNS3	1	3571	0	NaN	NaN	NaN	NaN	NaN	NaN	NaN	NaN	NaN	NaN	NaN	NaN	NaN	NaN	NaN	NaN	NaN
UID16438	S	3	___1	KS(0.989)PPPS(0.011)FCLEYTSAIFEFK	0.988704	4.42e-18	144.22	128.45	80.224	-0.13704	80574000	716	NaN	0.941789	0.895627	0.964711	NaN	0.988704	NaN	0.799099	0	Q68DQ2	716	Q68DQ2	Q68DQ2	Very large A-kinase anchor protein	CRYBG3	KEENVKNHVEAAGRKSPPPSFCLEYTSAIFE	sp|Q68DQ2|CRBG3_HUMAN Very large A-kinase anchor protein OS=Homo sapiens OX=9606 GN=CRYBG3 PE=1 SV=3	1	3581	0	NaN	NaN	NaN	NaN	NaN	NaN	NaN	NaN	NaN	NaN	NaN	NaN	NaN	NaN	NaN	NaN	NaN
UID16552	S	3	___1	SLAES(1)IDDALNCR	0.999863	0.000130375	89.506	76.93	89.506	0.29609	85276000	253	0	0.999863	NaN	0	0	0.998629	NaN	NaN	NaN	Q6DN90;Q6DN90-2	253;131	Q6DN90	Q6DN90	IQ motif and SEC7 domain-containing protein 1	IQSEC1	ELEDAFSRQVKSLAESIDDALNCRSLHTEEA	sp|Q6DN90|IQEC1_HUMAN IQ motif and SEC7 domain-containing protein 1 OS=Homo sapiens OX=9606 GN=IQSEC1 PE=1 SV=1;sp|Q6DN90-2|IQEC1_HUMAN Isoform 2 of IQ motif and SEC7 domain-containing protein 1 OS=Homo sapiens OX=9606 GN=IQSEC1	1	3603	0	NaN	NaN	NaN	NaN	NaN	NaN	NaN	NaN	NaN	NaN	NaN	NaN	NaN	NaN	NaN	NaN	NaN
UID16598	S	3	___1	RGS(1)S(1)PGS(1)LEIPK	1	3.15e-09	129.05	114.36	70.96	-0.062851	3379600000	864	0.962726	0.999081	0.771975	1	1	1	0.999143	1	1	Q6GYQ0-4;Q6GYQ0;Q6GYQ0-5;Q6GYQ0-2;Q6GYQ0-7;Q6GYQ0-3;Q6GYQ0-6	864;864;864;864;877;911;911	Q6GYQ0-4	Q6GYQ0-4	Ral GTPase-activating protein subunit alpha-1	RALGAPA1	SGNASTMTRRGSSPGSLEIPKDLPDILNKQN	sp|Q6GYQ0-4|RGPA1_HUMAN Isoform 4 of Ral GTPase-activating protein subunit alpha-1 OS=Homo sapiens OX=9606 GN=RALGAPA1;sp|Q6GYQ0|RGPA1_HUMAN Ral GTPase-activating protein subunit alpha-1 OS=Homo sapiens OX=9606 GN=RALGAPA1 PE=1 SV=1;sp|Q6GYQ0-5|RGPA1_HUMAN	1;2;3	3611	0	NaN	NaN	NaN	NaN	NaN	NaN	NaN	NaN	NaN	NaN	NaN	NaN	NaN	NaN	NaN	NaN	NaN
UID16599	S	4	___1	GVGHEFQKVS(1)VDK	1	6.8e-09	129.11	94.931	129.11	-0.019419	110590000	711	NaN	0	0	NaN	1	NaN	NaN	NaN	NaN	Q6GYQ0-4;Q6GYQ0;Q6GYQ0-5;Q6GYQ0-2;Q6GYQ0-7;Q6GYQ0-3;Q6GYQ0-6	711;711;711;711;711;711;711	Q6GYQ0-4	Q6GYQ0-4	Ral GTPase-activating protein subunit alpha-1	RALGAPA1	KKHKGKGVGHEFQKVSVDKSFSRGWSRDQPG	sp|Q6GYQ0-4|RGPA1_HUMAN Isoform 4 of Ral GTPase-activating protein subunit alpha-1 OS=Homo sapiens OX=9606 GN=RALGAPA1;sp|Q6GYQ0|RGPA1_HUMAN Ral GTPase-activating protein subunit alpha-1 OS=Homo sapiens OX=9606 GN=RALGAPA1 PE=1 SV=1;sp|Q6GYQ0-5|RGPA1_HUMAN	1	3611	0	NaN	NaN	NaN	NaN	NaN	NaN	NaN	NaN	NaN	NaN	NaN	NaN	NaN	NaN	NaN	NaN	NaN
UID16604	S	4	___1	NLYSLDLSDLPLDKLS(1)EQK	1	1.2e-55	183.42	160.51	183.42	-0.58903	6046200	691	NaN	NaN	NaN	NaN	NaN	1	NaN	NaN	NaN	Q6GYQ0-4;Q6GYQ0;Q6GYQ0-5;Q6GYQ0-2;Q6GYQ0-7;Q6GYQ0-3;Q6GYQ0-6	691;691;691;691;691;691;691	Q6GYQ0-4	Q6GYQ0-4	Ral GTPase-activating protein subunit alpha-1	RALGAPA1	NLYSLDLSDLPLDKLSEQKQKKHKGKGVGHE	sp|Q6GYQ0-4|RGPA1_HUMAN Isoform 4 of Ral GTPase-activating protein subunit alpha-1 OS=Homo sapiens OX=9606 GN=RALGAPA1;sp|Q6GYQ0|RGPA1_HUMAN Ral GTPase-activating protein subunit alpha-1 OS=Homo sapiens OX=9606 GN=RALGAPA1 PE=1 SV=1;sp|Q6GYQ0-5|RGPA1_HUMAN	1	3611	0	NaN	NaN	NaN	NaN	NaN	NaN	NaN	NaN	NaN	NaN	NaN	NaN	NaN	NaN	NaN	NaN	NaN
UID16635	S	3	___1	ES(0.546)RS(0.454)PQQSAALPR	0.545839	4.06e-19	151.41	134.2	151.41	-0.038326	144320000	260	NaN	NaN	NaN	NaN	0.545839	NaN	NaN	NaN	NaN	Q6IBW4-2;Q6IBW4;Q6IBW4-4	260;282;282	Q6IBW4-2	Q6IBW4-2	Condensin-2 complex subunit H2	NCAPH2	LPEASAPKAALEPKESRSPQQSAALPRRYML	sp|Q6IBW4-2|CNDH2_HUMAN Isoform 2 of Condensin-2 complex subunit H2 OS=Homo sapiens OX=9606 GN=NCAPH2;sp|Q6IBW4|CNDH2_HUMAN Condensin-2 complex subunit H2 OS=Homo sapiens OX=9606 GN=NCAPH2 PE=1 SV=1;sp|Q6IBW4-4|CNDH2_HUMAN Isoform 4 of Condensin-2 complex	1	3617	0	NaN	NaN	NaN	NaN	NaN	NaN	NaN	NaN	NaN	NaN	NaN	NaN	NaN	NaN	NaN	NaN	NaN
UID16637	S	4	___1	GAFMLEPEGMS(0.664)PMEPAGVS(0.335)PMPGT(0.001)QK	0.663886	0.00013494	58.015	42.925	58.015	-0.16836	115650000	178	NaN	NaN	NaN	NaN	NaN	0.663886	NaN	NaN	NaN	Q6IBW4-2;Q6IBW4;Q6IBW4-4;Q6IBW4-5	178;200;200;200	Q6IBW4-2	Q6IBW4-2	Condensin-2 complex subunit H2	NCAPH2	NPLYRGAFMLEPEGMSPMEPAGVSPMPGTQK	sp|Q6IBW4-2|CNDH2_HUMAN Isoform 2 of Condensin-2 complex subunit H2 OS=Homo sapiens OX=9606 GN=NCAPH2;sp|Q6IBW4|CNDH2_HUMAN Condensin-2 complex subunit H2 OS=Homo sapiens OX=9606 GN=NCAPH2 PE=1 SV=1;sp|Q6IBW4-4|CNDH2_HUMAN Isoform 4 of Condensin-2 complex	1	3617	0	NaN	NaN	NaN	NaN	NaN	NaN	NaN	NaN	NaN	NaN	NaN	NaN	NaN	NaN	NaN	NaN	NaN
UID16642	S	3	___1	DS(0.5)S(0.5)PVGLVEEAGSR	0.499999	0.00667852	56.906	29.496	56.906	-0.12205	7779300	179	NaN	NaN	NaN	NaN	NaN	0.499999	NaN	NaN	NaN	Q6ICB4	179	Q6ICB4	Q6ICB4	Sesquipedalian-2	FAM109B	HRAAGLENGHCLSKDSSPVGLVEEAGSRSAG	sp|Q6ICB4|SESQ2_HUMAN Sesquipedalian-2 OS=Homo sapiens OX=9606 GN=PHETA2 PE=1 SV=1	1	3620	0	NaN	NaN	NaN	NaN	NaN	NaN	NaN	NaN	NaN	NaN	NaN	NaN	NaN	NaN	NaN	NaN	NaN
UID16643	S	3	___1	DS(0.5)S(0.5)PVGLVEEAGSR	0.499999	0.00667852	56.906	29.496	56.906	-0.12205	7779300	180	NaN	NaN	NaN	NaN	NaN	0.499999	NaN	NaN	NaN	Q6ICB4	180	Q6ICB4	Q6ICB4	Sesquipedalian-2	FAM109B	RAAGLENGHCLSKDSSPVGLVEEAGSRSAGW	sp|Q6ICB4|SESQ2_HUMAN Sesquipedalian-2 OS=Homo sapiens OX=9606 GN=PHETA2 PE=1 SV=1	1	3620	0	NaN	NaN	NaN	NaN	NaN	NaN	NaN	NaN	NaN	NaN	NaN	NaN	NaN	NaN	NaN	NaN	NaN
UID16645	S	3	___1	NNRPAFFS(0.351)PS(0.649)LK	0.648807	0.0101003	58.09	35.288	50.843	-0.3012	260850000	272	0	NaN	0.5	0.5	0	0.648807	0	0.5	NaN	Q6ICG6-3;Q6ICG6;Q6ICG6-2	272;306;311	Q6ICG6-3	Q6ICG6-3	Uncharacterized protein KIAA0930	KIAA0930	PPTPERNNRPAFFSPSLKRKVPRNRIAEMKK	sp|Q6ICG6-3|K0930_HUMAN Isoform 3 of Uncharacterized protein KIAA0930 OS=Homo sapiens OX=9606 GN=KIAA0930;sp|Q6ICG6|K0930_HUMAN Uncharacterized protein KIAA0930 OS=Homo sapiens OX=9606 GN=KIAA0930 PE=1 SV=1;sp|Q6ICG6-2|K0930_HUMAN Isoform 2 of Uncharacteri	1	3621	0	NaN	NaN	NaN	NaN	NaN	NaN	NaN	NaN	NaN	NaN	NaN	NaN	NaN	NaN	NaN	NaN	NaN
UID16652	S	2	___1	AAT(0.061)S(0.939)PGVGQSAPGTR	0.938884	8.7e-05	94.61	80.801	83.823	-0.15533	86954000	703	NaN	0.938884	NaN	NaN	NaN	0.839671	0	NaN	0.7327	Q6IE81;Q6IE81-2	703;691	Q6IE81	Q6IE81	Protein Jade-1	JADE1	TDVSQRHLDNTRAATSPGVGQSAPGTRKEIV	sp|Q6IE81|JADE1_HUMAN Protein Jade-1 OS=Homo sapiens OX=9606 GN=JADE1 PE=1 SV=1;sp|Q6IE81-2|JADE1_HUMAN Isoform 2 of Protein Jade-1 OS=Homo sapiens OX=9606 GN=JADE1	1	3623	0	NaN	NaN	NaN	NaN	NaN	NaN	NaN	NaN	NaN	NaN	NaN	NaN	NaN	NaN	NaN	NaN	NaN
UID16740	S	4	___1	EAKPGAAEPEVGVPS(0.001)S(0.016)LS(0.919)PS(0.509)S(0.511)PS(0.039)S(0.005)S(0.001)WTETDVEER	0.509265	4.98e-86	189.79	178.39	174.02	0.30767	1037600000	219	0.507377	0.486619	0.490993	0.509265	0.508464	0.439597	0.450298	0.507395	0.477916	Q6L8Q7-2;Q6L8Q7	219;219	Q6L8Q7-2	Q6L8Q7-2	2',5'-phosphodiesterase 12	PDE12	GAAEPEVGVPSSLSPSSPSSSWTETDVEERV	sp|Q6L8Q7-2|PDE12_HUMAN Isoform 2 of 2',5'-phosphodiesterase 12 OS=Homo sapiens OX=9606 GN=PDE12;sp|Q6L8Q7|PDE12_HUMAN 2',5'-phosphodiesterase 12 OS=Homo sapiens OX=9606 GN=PDE12 PE=1 SV=2	1;2	3638	0	NaN	NaN	NaN	NaN	NaN	NaN	NaN	NaN	NaN	NaN	NaN	NaN	NaN	NaN	NaN	NaN	NaN
UID16747	S	4	___1	S(0.5)GS(0.5)PIVLALPHSQLPQAQK	0.5	5.01e-70	197.46	171.64	197.46	-0.082626	25181000	148	0	NaN	NaN	NaN	NaN	0.5	NaN	NaN	NaN	Q6MZP7;Q6MZP7-2;Q6MZP7-5	148;148;148	Q6MZP7	Q6MZP7	Protein lin-54 homolog	LIN54	LKPDGQKLILTTLGKSGSPIVLALPHSQLPQ	sp|Q6MZP7|LIN54_HUMAN Protein lin-54 homolog OS=Homo sapiens OX=9606 GN=LIN54 PE=1 SV=3;sp|Q6MZP7-2|LIN54_HUMAN Isoform 2 of Protein lin-54 homolog OS=Homo sapiens OX=9606 GN=LIN54;sp|Q6MZP7-5|LIN54_HUMAN Isoform 5 of Protein lin-54 homolog OS=Homo sapiens	1	3639	0	NaN	NaN	NaN	NaN	NaN	NaN	NaN	NaN	NaN	NaN	NaN	NaN	NaN	NaN	NaN	NaN	NaN
UID16748	S	4	___1	S(0.5)GS(0.5)PIVLALPHSQLPQAQK	0.5	5.01e-70	197.46	171.64	197.46	-0.082626	25181000	150	0	NaN	NaN	NaN	NaN	0.5	NaN	NaN	NaN	Q6MZP7;Q6MZP7-2;Q6MZP7-5	150;150;150	Q6MZP7	Q6MZP7	Protein lin-54 homolog	LIN54	PDGQKLILTTLGKSGSPIVLALPHSQLPQAQ	sp|Q6MZP7|LIN54_HUMAN Protein lin-54 homolog OS=Homo sapiens OX=9606 GN=LIN54 PE=1 SV=3;sp|Q6MZP7-2|LIN54_HUMAN Isoform 2 of Protein lin-54 homolog OS=Homo sapiens OX=9606 GN=LIN54;sp|Q6MZP7-5|LIN54_HUMAN Isoform 5 of Protein lin-54 homolog OS=Homo sapiens	1	3639	0	NaN	NaN	NaN	NaN	NaN	NaN	NaN	NaN	NaN	NaN	NaN	NaN	NaN	NaN	NaN	NaN	NaN
UID16769	S	3	___1	S(0.44)PS(0.557)VT(0.003)SSQAMLAK	0.556726	0.000297893	82.651	55.922	82.651	-0.60553	25466000	213	NaN	NaN	NaN	NaN	0	0.556726	NaN	NaN	NaN	Q6N043-3;Q6N043-2;Q6N043	213;200;213	Q6N043-3	Q6N043-3	Zinc finger protein 280D	ZNF280D	SGANSSAVLPSVKSPSVTSSQAMLAKGTNTS	sp|Q6N043-3|Z280D_HUMAN Isoform 3 of Zinc finger protein 280D OS=Homo sapiens OX=9606 GN=ZNF280D;sp|Q6N043-2|Z280D_HUMAN Isoform 2 of Zinc finger protein 280D OS=Homo sapiens OX=9606 GN=ZNF280D;sp|Q6N043|Z280D_HUMAN Zinc finger protein 280D OS=Homo sapiens	1	3643	0	NaN	NaN	NaN	NaN	NaN	NaN	NaN	NaN	NaN	NaN	NaN	NaN	NaN	NaN	NaN	NaN	NaN
UID16819	S	3	___1	GS(0.259)PS(0.567)S(0.174)HLLGADHGLR	0.567137	1.31e-05	112.16	93.414	112.16	0.0908	51483000	753	NaN	NaN	NaN	NaN	0.567137	NaN	NaN	NaN	NaN	Q6NWY9-2;Q6NWY9-3;Q6NWY9	753;765;766	Q6NWY9-2	Q6NWY9-2	Pre-mRNA-processing factor 40 homolog B	PRPF40B	SVESGGAALGGRGSPSSHLLGADHGLRKAKK	sp|Q6NWY9-2|PR40B_HUMAN Isoform 2 of Pre-mRNA-processing factor 40 homolog B OS=Homo sapiens OX=9606 GN=PRPF40B;sp|Q6NWY9-3|PR40B_HUMAN Isoform 3 of Pre-mRNA-processing factor 40 homolog B OS=Homo sapiens OX=9606 GN=PRPF40B;sp|Q6NWY9|PR40B_HUMAN Pre-mRNA-p	1	3660	0	NaN	NaN	NaN	NaN	NaN	NaN	NaN	NaN	NaN	NaN	NaN	NaN	NaN	NaN	NaN	NaN	NaN
UID16868	S	3	___1	QEQPS(0.028)RNS(0.986)S(0.986)LLEPQK	0.985603	0.000106127	107.85	60.559	40.515	4.4761	190040000	135	0.827171	NaN	0.736374	NaN	0.88791	0.985603	NaN	0.879473	0.629779	Q6P0N0;Q6P0N0-2	135;135	Q6P0N0	Q6P0N0	Mis18-binding protein 1	MIS18BP1	EKVLRDKQEQPSRNSSLLEPQKSGNNETFTP	sp|Q6P0N0|M18BP_HUMAN Mis18-binding protein 1 OS=Homo sapiens OX=9606 GN=MIS18BP1 PE=1 SV=1;sp|Q6P0N0-2|M18BP_HUMAN Isoform 2 of Mis18-binding protein 1 OS=Homo sapiens OX=9606 GN=MIS18BP1	1;2	3673	0	NaN	NaN	NaN	NaN	NaN	NaN	NaN	NaN	NaN	NaN	NaN	NaN	NaN	NaN	NaN	NaN	NaN
UID17030	S	3	___1	AVPS(0.002)S(0.01)FS(0.988)PFVEFK	0.987961	2.45e-05	106.52	86.062	90.367	-0.45995	52270000	446	0.98234	0.907225	NaN	0.956457	0.987888	0	0.987961	0.980424	NaN	Q6P4R8-3;Q6P4R8;Q6P4R8-2	446;446;471	Q6P4R8-3	Q6P4R8-3	Nuclear factor related to kappa-B-binding protein	NFRKB	LQYLAGESRAVPSSFSPFVEFKEKTQQWKLL	sp|Q6P4R8-3|NFRKB_HUMAN Isoform 3 of Nuclear factor related to kappa-B-binding protein OS=Homo sapiens OX=9606 GN=NFRKB;sp|Q6P4R8|NFRKB_HUMAN Nuclear factor related to kappa-B-binding protein OS=Homo sapiens OX=9606 GN=NFRKB PE=1 SV=2;sp|Q6P4R8-2|NFRKB_HUM	1	3697	0	NaN	NaN	NaN	NaN	NaN	NaN	NaN	NaN	NaN	NaN	NaN	NaN	NaN	NaN	NaN	NaN	NaN
UID17042	S	4	___1	SAVLSEPVLFLKPS(0.001)T(0.001)AY(0.005)APEGS(0.983)PILMPAY(0.008)T(0.002)R	0.982561	4.2e-14	91.615	83.069	91.615	0.45287	37482000	57	NaN	0	NaN	NaN	0	0.982561	NaN	NaN	NaN	Q6P587;Q6P587-2;Q6P587-3	57;57;57	Q6P587	Q6P587	Acylpyruvase FAHD1, mitochondrial	FAHD1	PVLFLKPSTAYAPEGSPILMPAYTRNLHHEL	sp|Q6P587|FAHD1_HUMAN Acylpyruvase FAHD1, mitochondrial OS=Homo sapiens OX=9606 GN=FAHD1 PE=1 SV=2;sp|Q6P587-2|FAHD1_HUMAN Isoform 2 of Acylpyruvase FAHD1, mitochondrial OS=Homo sapiens OX=9606 GN=FAHD1;sp|Q6P587-3|FAHD1_HUMAN Isoform 3 of Acylpyruvase FAH	1	3699	0	NaN	NaN	NaN	NaN	NaN	NaN	NaN	NaN	NaN	NaN	NaN	NaN	NaN	NaN	NaN	NaN	NaN
UID17057	S	3	___1	QPKPPHEGS(1)R	1	6.66e-58	181.38	168.42	45.014	-0.12316	98536000	444	NaN	NaN	NaN	1	1	NaN	NaN	NaN	NaN	Q6P5W5-2;Q6P5W5	444;469	Q6P5W5-2	Q6P5W5-2	Zinc transporter ZIP4	SLC39A4	LAPSELRQPKPPHEGSRADLVAEESPELLNP	sp|Q6P5W5-2|S39A4_HUMAN Isoform 2 of Zinc transporter ZIP4 OS=Homo sapiens OX=9606 GN=SLC39A4;sp|Q6P5W5|S39A4_HUMAN Zinc transporter ZIP4 OS=Homo sapiens OX=9606 GN=SLC39A4 PE=1 SV=4	1	3703	0	NaN	NaN	NaN	NaN	NaN	NaN	NaN	NaN	NaN	NaN	NaN	NaN	NaN	NaN	NaN	NaN	NaN
UID17069	S	3	___1	YQEDS(1)DPERS(1)DYEEQQLQK	0.999965	1.11e-57	192.18	150.42	154.86	0.05163	12964000000	58	0.999089	0.99979	0.997553	0.999657	0.997492	0.999945	0.997052	0.999815	0.999965	Q6P6C2-3;Q6P6C2;Q6P6C2-1	58;69;69	Q6P6C2-3	Q6P6C2-3	RNA demethylase ALKBH5	ALKBH5	SGAKRKYQEDSDPERSDYEEQQLQKEEEARK	sp|Q6P6C2-3|ALKB5_HUMAN Isoform 3 of RNA demethylase ALKBH5 OS=Homo sapiens OX=9606 GN=ALKBH5;sp|Q6P6C2|ALKB5_HUMAN RNA demethylase ALKBH5 OS=Homo sapiens OX=9606 GN=ALKBH5 PE=1 SV=2;sp|Q6P6C2-1|ALKB5_HUMAN Isoform 1 of RNA demethylase ALKBH5 OS=Homo sapie	1;2	3705	0	NaN	NaN	NaN	NaN	NaN	NaN	NaN	NaN	NaN	NaN	NaN	NaN	NaN	NaN	NaN	NaN	NaN
UID17080	S	4	___1	QIPVVGS(0.004)VLNWFS(0.996)PVQALQK	0.99596	0.000771979	61.815	44.115	61.815	-0.19508	198560000	561	NaN	NaN	NaN	NaN	0.99596	NaN	0.845712	NaN	NaN	Q6P996-3;Q6P996-4;Q6P996-5;Q6P996	561;624;625;652	Q6P996-3	Q6P996-3	Pyridoxal-dependent decarboxylase domain-containing protein 1	PDXDC1	VLRQIPVVGSVLNWFSPVQALQKGRTFNLTA	sp|Q6P996-3|PDXD1_HUMAN Isoform 3 of Pyridoxal-dependent decarboxylase domain-containing protein 1 OS=Homo sapiens OX=9606 GN=PDXDC1;sp|Q6P996-4|PDXD1_HUMAN Isoform 4 of Pyridoxal-dependent decarboxylase domain-containing protein 1 OS=Homo sapiens OX=9606	1	3707	0	NaN	NaN	NaN	NaN	NaN	NaN	NaN	NaN	NaN	NaN	NaN	NaN	NaN	NaN	NaN	NaN	NaN
UID17096	S	3	___1	VPIFEEDT(0.007)PS(0.993)VMEIEMEELDK	0.992639	1.54e-10	105.79	86.07	105.79	-0.63672	112750000	140	NaN	0	0.934913	NaN	0.938023	NaN	0	0.992639	NaN	Q6P9G4	140	Q6P9G4	Q6P9G4	Transmembrane protein 154	TMEM154	GSENVKVPIFEEDTPSVMEIEMEELDKWMNS	sp|Q6P9G4|TM154_HUMAN Transmembrane protein 154 OS=Homo sapiens OX=9606 GN=TMEM154 PE=1 SV=2	1	3711	0	NaN	NaN	NaN	NaN	NaN	NaN	NaN	NaN	NaN	NaN	NaN	NaN	NaN	NaN	NaN	NaN	NaN
UID17140	S	3	___1	ADEFADQS(0.243)PGNLS(0.62)S(0.087)S(0.027)S(0.024)LR	0.619664	2.47e-11	131.35	104.38	103.67	0.34258	56436000	118	0.458024	NaN	0	NaN	0	0.619664	NaN	0.569871	0.491202	Q6PGQ7-2;Q6PGQ7	118;188	Q6PGQ7-2	Q6PGQ7-2	Protein aurora borealis	BORA	YFRADEFADQSPGNLSSSSLRRKLFLDGNGS	sp|Q6PGQ7-2|BORA_HUMAN Isoform 2 of Protein aurora borealis OS=Homo sapiens OX=9606 GN=BORA;sp|Q6PGQ7|BORA_HUMAN Protein aurora borealis OS=Homo sapiens OX=9606 GN=BORA PE=1 SV=2	1	3721	0	NaN	NaN	NaN	NaN	NaN	NaN	NaN	NaN	NaN	NaN	NaN	NaN	NaN	NaN	NaN	NaN	NaN
UID17163	S	4	___1	GKS(0.967)PPRPGNS(0.033)QPPDVFVSSVAETTSQATASEVQTNR	0.96653	3.57e-177	236.29	221.22	236.29	-0.074642	33870000	181	NaN	NaN	NaN	NaN	NaN	0.96653	NaN	NaN	NaN	Q6PIF2	181	Q6PIF2	Q6PIF2	Synaptonemal complex central element protein 2	SYCE2	QSLRLRWGPDHSRGKSPPRPGNSQPPDVFVS	sp|Q6PIF2|SYCE2_HUMAN Synaptonemal complex central element protein 2 OS=Homo sapiens OX=9606 GN=SYCE2 PE=1 SV=2	1	3728	0	NaN	NaN	NaN	NaN	NaN	NaN	NaN	NaN	NaN	NaN	NaN	NaN	NaN	NaN	NaN	NaN	NaN
UID17180	S	3	___1	EEMSSMPDDVFES(0.006)PPLS(0.924)AS(0.07)YFR	0.923852	1.12e-11	112.26	98.249	112.26	2.4475	136170000	284	NaN	NaN	NaN	0	0.875365	0.923852	NaN	NaN	0.660957	Q6PJF5-2;Q6PJF5	284;313	Q6PJF5-2	Q6PJF5-2	Inactive rhomboid protein 2	RHBDF2	EMSSMPDDVFESPPLSASYFRGIPHSASPVS	sp|Q6PJF5-2|RHDF2_HUMAN Isoform 2 of Inactive rhomboid protein 2 OS=Homo sapiens OX=9606 GN=RHBDF2;sp|Q6PJF5|RHDF2_HUMAN Inactive rhomboid protein 2 OS=Homo sapiens OX=9606 GN=RHBDF2 PE=1 SV=2	1	3734	0	NaN	NaN	NaN	NaN	NaN	NaN	NaN	NaN	NaN	NaN	NaN	NaN	NaN	NaN	NaN	NaN	NaN
UID17202	S	3	___1	S(0.555)CS(0.445)LDLGDAGCYGYAR	0.554887	4.84e-05	101.92	87.233	101.92	0.5924	18359000	583	NaN	NaN	NaN	NaN	NaN	0.554887	NaN	NaN	NaN	Q6PJG9	583	Q6PJG9	Q6PJG9	Leucine-rich repeat and fibronectin type-III domain-containing protein 4	LRFN4	PKAHPPRSPPPRPQRSCSLDLGDAGCYGYAR	sp|Q6PJG9|LRFN4_HUMAN Leucine-rich repeat and fibronectin type-III domain-containing protein 4 OS=Homo sapiens OX=9606 GN=LRFN4 PE=1 SV=1	1	3737	0	NaN	NaN	NaN	NaN	NaN	NaN	NaN	NaN	NaN	NaN	NaN	NaN	NaN	NaN	NaN	NaN	NaN
UID17212	S	5	___1	ISPPIKEEETKGDS(1)VEK	1	1.84e-140	270	240.83	270	0.059729	271730000	421	1	0.997337	0	0	0.942955	0.997031	NaN	0	NaN	Q6PJT7-5;Q6PJT7;Q6PJT7-10;Q6PJT7-4;Q6PJT7-9;Q6PJT7-2;Q6PJT7-3;Q6PJT7-11	421;421;384;387;421;421;421;402	Q6PJT7-5;Q6PJT7-9	Q6PJT7-9	Zinc finger CCCH domain-containing protein 14	ZC3H14	PRISPPIKEEETKGDSVEKNQDYYDMESMVH;PRISPPIKEEETKGDSVEKNQGTQQRQLLSR	sp|Q6PJT7-5|ZC3HE_HUMAN Isoform 5 of Zinc finger CCCH domain-containing protein 14 OS=Homo sapiens OX=9606 GN=ZC3H14;sp|Q6PJT7|ZC3HE_HUMAN Zinc finger CCCH domain-containing protein 14 OS=Homo sapiens OX=9606 GN=ZC3H14 PE=1 SV=1;sp|Q6PJT7-10|ZC3HE_HUMAN Is	1;2	3740;3741	0	NaN	NaN	NaN	NaN	NaN	NaN	NaN	NaN	NaN	NaN	NaN	NaN	NaN	NaN	NaN	NaN	NaN
UID17239	S	2	___1	GLS(0.008)AS(0.385)LPDLDS(0.607)ENWIEVK	0.606746	0.000417576	81.625	62.301	81.625	-0.010842	26379000	554	0	NaN	0	NaN	0.606746	0	0	0	NaN	Q6PKG0;Q6PKG0-3	554;477	Q6PKG0	Q6PKG0	La-related protein 1	LARP1	KTLPKGLSASLPDLDSENWIEVKKRPRPSPA	sp|Q6PKG0|LARP1_HUMAN La-related protein 1 OS=Homo sapiens OX=9606 GN=LARP1 PE=1 SV=2;sp|Q6PKG0-3|LARP1_HUMAN Isoform 2 of La-related protein 1 OS=Homo sapiens OX=9606 GN=LARP1	1	3744	0	NaN	NaN	NaN	NaN	NaN	NaN	NaN	NaN	NaN	NaN	NaN	NaN	NaN	NaN	NaN	NaN	NaN
UID17240	S	3	___1	HS(0.527)S(0.473)NPPLESHVGWVMDSR	0.526843	0.00604679	52.79	40.767	52.79	-0.28588	205440000	823	NaN	NaN	NaN	NaN	NaN	0.526843	NaN	NaN	NaN	Q6PKG0;Q6PKG0-3	823;746	Q6PKG0	Q6PKG0	La-related protein 1	LARP1	RTLDAKMPRKRKTRHSSNPPLESHVGWVMDS	sp|Q6PKG0|LARP1_HUMAN La-related protein 1 OS=Homo sapiens OX=9606 GN=LARP1 PE=1 SV=2;sp|Q6PKG0-3|LARP1_HUMAN Isoform 2 of La-related protein 1 OS=Homo sapiens OX=9606 GN=LARP1	1	3744	0	NaN	NaN	NaN	NaN	NaN	NaN	NaN	NaN	NaN	NaN	NaN	NaN	NaN	NaN	NaN	NaN	NaN
UID17289	S	2	___1	T(0.057)PS(0.871)S(0.071)SSTLAYSPR	0.871264	2.6e-42	203.29	165.96	203.29	-0.18505	104470000	61	0.496625	NaN	NaN	0.617171	0.430104	0.871264	NaN	NaN	0.493916	Q6Q0C0	61	Q6Q0C0	Q6Q0C0	E3 ubiquitin-protein ligase TRAF7	TRAF7	KADGTSTYKQHCRTPSSSSTLAYSPRDEEDS	sp|Q6Q0C0|TRAF7_HUMAN E3 ubiquitin-protein ligase TRAF7 OS=Homo sapiens OX=9606 GN=TRAF7 PE=1 SV=1	1	3749	0	NaN	NaN	NaN	NaN	NaN	NaN	NaN	NaN	NaN	NaN	NaN	NaN	NaN	NaN	NaN	NaN	NaN
UID17307	S	3	___1	S(0.175)QS(0.8)FNT(0.017)DT(0.003)T(0.004)T(0.001)SGISSMSSSPSR	0.799788	0.000853237	60.093	46.893	60.093	-0.74677	27735000	1219	0	NaN	NaN	NaN	NaN	0.799788	NaN	NaN	NaN	Q6R327-3;Q6R327	1219;1219	Q6R327-3	Q6R327-3	Rapamycin-insensitive companion of mTOR	RICTOR	VVESSTSSHMKIRSQSFNTDTTTSGISSMSS	sp|Q6R327-3|RICTR_HUMAN Isoform 3 of Rapamycin-insensitive companion of mTOR OS=Homo sapiens OX=9606 GN=RICTOR;sp|Q6R327|RICTR_HUMAN Rapamycin-insensitive companion of mTOR OS=Homo sapiens OX=9606 GN=RICTOR PE=1 SV=1	1	3751	0	NaN	NaN	NaN	NaN	NaN	NaN	NaN	NaN	NaN	NaN	NaN	NaN	NaN	NaN	NaN	NaN	NaN
UID17322	S	4	___1	EGGTASVAT(0.026)GPDS(0.987)PS(0.987)PVPLPPGKPALPGADGTPFGCPPGR	0.98695	5.27e-24	101.78	93.993	80.923	-0.1066	87184000	427	0.492668	0.983744	0.98695	0	0.960666	NaN	NaN	NaN	NaN	Q6SPF0	427	Q6SPF0	Q6SPF0	Atherin	SAMD1	KEGGTASVATGPDSPSPVPLPPGKPALPGAD	sp|Q6SPF0|SAMD1_HUMAN Atherin OS=Homo sapiens OX=9606 GN=SAMD1 PE=1 SV=1	1;2	3756	0	NaN	NaN	NaN	NaN	NaN	NaN	NaN	NaN	NaN	NaN	NaN	NaN	NaN	NaN	NaN	NaN	NaN
UID17348	S	4	___1	NEERDS(1)DTEKEGPEK	0.999599	3.09e-11	132.14	113.01	132.14	0.2731	113050000	76	NaN	NaN	NaN	NaN	NaN	0.999599	NaN	NaN	0	Q6UB98-2	76	Q6UB98-2	Q6UB98-2	Ankyrin repeat domain-containing protein 12	ANKRD12	KLPFTISPSRNEERDSDTEKEGPEKKKTKKE	sp|Q6UB98-2|ANR12_HUMAN Isoform 2 of Ankyrin repeat domain-containing protein 12 OS=Homo sapiens OX=9606 GN=ANKRD12	1	3762	0	NaN	NaN	NaN	NaN	NaN	NaN	NaN	NaN	NaN	NaN	NaN	NaN	NaN	NaN	NaN	NaN	NaN
UID17364	S	3	___1	KDS(1)GQYEK	0.999774	0.00521787	72.891	39.482	72.891	-0.17229	30983000	1389	NaN	NaN	NaN	NaN	0.999774	NaN	NaN	NaN	NaN	Q6UB99	1389	Q6UB99	Q6UB99	Ankyrin repeat domain-containing protein 11	ANKRD11	KEKGEDYKEGGSRKDSGQYEKDFLEADAYGV	sp|Q6UB99|ANR11_HUMAN Ankyrin repeat domain-containing protein 11 OS=Homo sapiens OX=9606 GN=ANKRD11 PE=1 SV=3	1	3763	0	NaN	NaN	NaN	NaN	NaN	NaN	NaN	NaN	NaN	NaN	NaN	NaN	NaN	NaN	NaN	NaN	NaN
UID17451	S	4	___1	NPVSLPSLPNPTKPNNVPS(0.689)VPS(0.254)PS(0.056)IQR	0.689102	1.98e-22	115	99.516	115	0.38146	104850000	848	NaN	NaN	NaN	0	0.689102	NaN	0	NaN	0.443063	Q6VMQ6-2;Q6VMQ6-5;Q6VMQ6;Q6VMQ6-4	848;848;849;857	Q6VMQ6-2	Q6VMQ6-2	Activating transcription factor 7-interacting protein 1	ATF7IP	SLPSLPNPTKPNNVPSVPSPSIQRNPTASAA	sp|Q6VMQ6-2|MCAF1_HUMAN Isoform 2 of Activating transcription factor 7-interacting protein 1 OS=Homo sapiens OX=9606 GN=ATF7IP;sp|Q6VMQ6-5|MCAF1_HUMAN Isoform 4 of Activating transcription factor 7-interacting protein 1 OS=Homo sapiens OX=9606 GN=ATF7IP;sp	1	3784	0	NaN	NaN	NaN	NaN	NaN	NaN	NaN	NaN	NaN	NaN	NaN	NaN	NaN	NaN	NaN	NaN	NaN
UID17558	S	3	___1	ECDQGTLSASLNPSNSES(0.084)S(0.678)PS(0.238)R	0.678128	1.51e-72	199.38	185.44	144.11	0.59094	48870000	1430	NaN	NaN	NaN	NaN	NaN	0.626976	NaN	NaN	0.678128	Q6XZF7;Q6XZF7-2	1430;676	Q6XZF7	Q6XZF7	Dynamin-binding protein	DNMBP	QGTLSASLNPSNSESSPSRCPSDPDSTSQPR	sp|Q6XZF7|DNMBP_HUMAN Dynamin-binding protein OS=Homo sapiens OX=9606 GN=DNMBP PE=1 SV=1;sp|Q6XZF7-2|DNMBP_HUMAN Isoform 2 of Dynamin-binding protein OS=Homo sapiens OX=9606 GN=DNMBP	1	3794	0	NaN	NaN	NaN	NaN	NaN	NaN	NaN	NaN	NaN	NaN	NaN	NaN	NaN	NaN	NaN	NaN	NaN
UID17723	S	4	___1	LS(0.547)S(0.444)AT(0.009)ANALYSSNLRDDTK	0.547042	7.34e-06	90.534	60.44	81.224	-0.24739	106980000	1024	NaN	NaN	0	NaN	0.547042	0.543023	NaN	NaN	NaN	Q6ZRV2	1024	Q6ZRV2	Q6ZRV2	Protein FAM83H	FAM83H	STEAATEERGPRARLSSATANALYSSNLRDD	sp|Q6ZRV2|FA83H_HUMAN Protein FAM83H OS=Homo sapiens OX=9606 GN=FAM83H PE=1 SV=3	1	3818	0	NaN	NaN	NaN	NaN	NaN	NaN	NaN	NaN	NaN	NaN	NaN	NaN	NaN	NaN	NaN	NaN	NaN
UID17749	S	3	___1	S(0.321)QS(0.679)FAGVLGSHER	0.678916	1.8e-06	118.05	95.405	65.808	0.20589	197310000	22	0.541631	NaN	NaN	0.591575	0.678916	0.581936	NaN	NaN	NaN	Q6ZS17-2;Q6ZS17;Q6ZS17-3;Q6ZS17-4	22;22;36;42	Q6ZS17-2	Q6ZS17-2	Protein FAM65A	FAM65A	RPQRRLLSARVNRSQSFAGVLGSHERGPRSF	sp|Q6ZS17-2|RIPR1_HUMAN Isoform 2 of Rho family-interacting cell polarization regulator 1 OS=Homo sapiens OX=9606 GN=RIPOR1;sp|Q6ZS17|RIPR1_HUMAN Rho family-interacting cell polarization regulator 1 OS=Homo sapiens OX=9606 GN=RIPOR1 PE=1 SV=1;sp|Q6ZS17-3|R	1	3819	0	NaN	NaN	NaN	NaN	NaN	NaN	NaN	NaN	NaN	NaN	NaN	NaN	NaN	NaN	NaN	NaN	NaN
UID17842	S	3	___1	RES(1)PIEGQR	1	0.00731342	62.891	44.111	62.891	-0.2048	19451000	342	NaN	NaN	NaN	NaN	1	NaN	NaN	NaN	NaN	Q6ZUS6-6;Q6ZUS6;Q6ZUS6-5;Q6ZUS6-4	342;414;469;469	Q6ZUS6-6	Q6ZUS6-6	Coiled-coil domain-containing protein 149	CCDC149	TKEQAAAELEEVRRESPIEGQRSETGPAPPG	sp|Q6ZUS6-6|CC149_HUMAN Isoform 6 of Coiled-coil domain-containing protein 149 OS=Homo sapiens OX=9606 GN=CCDC149;sp|Q6ZUS6|CC149_HUMAN Coiled-coil domain-containing protein 149 OS=Homo sapiens OX=9606 GN=CCDC149 PE=2 SV=2;sp|Q6ZUS6-5|CC149_HUMAN Isoform 5	1	3840	0	NaN	NaN	NaN	NaN	NaN	NaN	NaN	NaN	NaN	NaN	NaN	NaN	NaN	NaN	NaN	NaN	NaN
UID17891	S	3	___1	T(0.002)S(0.002)AGS(0.193)Y(0.771)S(0.031)S(0.002)PPPAPY(0.459)S(0.541)APQAPALSVTGPITANSEQIAR	0.541197	3.34e-63	150.07	139.07	128.12	-0.0080645	234990000	151	0.539241	0.540223	NaN	NaN	0.541197	0.519813	NaN	NaN	NaN	Q6ZVM7-2;Q6ZVM7;Q6ZVM7-3	151;201;156	Q6ZVM7-2	Q6ZVM7-2	TOM1-like protein 2	TOM1L2	RTSAGSYSSPPPAPYSAPQAPALSVTGPITA	sp|Q6ZVM7-2|TM1L2_HUMAN Isoform 2 of TOM1-like protein 2 OS=Homo sapiens OX=9606 GN=TOM1L2;sp|Q6ZVM7|TM1L2_HUMAN TOM1-like protein 2 OS=Homo sapiens OX=9606 GN=TOM1L2 PE=1 SV=1;sp|Q6ZVM7-3|TM1L2_HUMAN Isoform 3 of TOM1-like protein 2 OS=Homo sapiens OX=960	1;2	3850	0	NaN	NaN	NaN	NaN	NaN	NaN	NaN	NaN	NaN	NaN	NaN	NaN	NaN	NaN	NaN	NaN	NaN
UID17897	S	3	___1	SSPASSQEGSPS(0.001)GDQQFS(0.999)PK	0.998629	5.14e-14	111.88	78.329	111.88	-0.26316	117320000	235	NaN	0	NaN	NaN	0.827372	0.998629	NaN	NaN	NaN	Q6ZW49;Q6ZW49-1	235;201	Q6ZW49	Q6ZW49	PAX-interacting protein 1	PAXIP1	PASSQEGSPSGDQQFSPKSNTEKSKGELMFD	sp|Q6ZW49|PAXI1_HUMAN PAX-interacting protein 1 OS=Homo sapiens OX=9606 GN=PAXIP1 PE=1 SV=2;sp|Q6ZW49-1|PAXI1_HUMAN Isoform 2 of PAX-interacting protein 1 OS=Homo sapiens OX=9606 GN=PAXIP1	1	3853	0	NaN	NaN	NaN	NaN	NaN	NaN	NaN	NaN	NaN	NaN	NaN	NaN	NaN	NaN	NaN	NaN	NaN
UID17924	S	3	___1	GRPALASQESSLSSTSPS(0.015)S(0.985)PLPVK	0.984827	3.93e-35	134.31	110.57	134.31	2.5714	175730000	1060	NaN	0.823097	NaN	NaN	0.864908	0.984827	NaN	NaN	0	Q70CQ4;Q70CQ4-2	1060;363	Q70CQ4	Q70CQ4	Ubiquitin carboxyl-terminal hydrolase 31	USP31	ALASQESSLSSTSPSSPLPVKVSLKPSRSRS	sp|Q70CQ4|UBP31_HUMAN Ubiquitin carboxyl-terminal hydrolase 31 OS=Homo sapiens OX=9606 GN=USP31 PE=2 SV=2;sp|Q70CQ4-2|UBP31_HUMAN Isoform 2 of Ubiquitin carboxyl-terminal hydrolase 31 OS=Homo sapiens OX=9606 GN=USP31	1	3860	0	NaN	NaN	NaN	NaN	NaN	NaN	NaN	NaN	NaN	NaN	NaN	NaN	NaN	NaN	NaN	NaN	NaN
UID17937	S	3	___1	RPS(1)VDSLVSK	0.999977	6.71e-06	138.01	88.385	138.01	0.10295	329830000	996	NaN	0.999482	0	NaN	0.999977	NaN	NaN	0.999374	NaN	Q70E73	996	Q70E73	Q70E73	Ras-associated and pleckstrin homology domains-containing protein 1	RAPH1	IKSSSGAEHPEPKRPSVDSLVSKFTPPAESG	sp|Q70E73|RAPH1_HUMAN Ras-associated and pleckstrin homology domains-containing protein 1 OS=Homo sapiens OX=9606 GN=RAPH1 PE=1 SV=3	1	3861	0	NaN	NaN	NaN	NaN	NaN	NaN	NaN	NaN	NaN	NaN	NaN	NaN	NaN	NaN	NaN	NaN	NaN
UID17954	S	3	___1	TLNYQS(1)LPHR	1	3.57e-05	124.47	60.028	124.47	0.41862	223390000	1381	0.999999	1	0.999994	0.999999	0.99837	0	0.999159	0.999998	NaN	Q70EL1-7;Q70EL1;Q70EL1-10;Q70EL1-8;Q70EL1-9	1381;1531;614;619;572	Q70EL1-7	Q70EL1-7	Inactive ubiquitin carboxyl-terminal hydrolase 54	USP54	TSQGAKYTGRTLNYQSLPHRSRTDNSWAPWS	sp|Q70EL1-7|UBP54_HUMAN Isoform 4 of Inactive ubiquitin carboxyl-terminal hydrolase 54 OS=Homo sapiens OX=9606 GN=USP54;sp|Q70EL1|UBP54_HUMAN Inactive ubiquitin carboxyl-terminal hydrolase 54 OS=Homo sapiens OX=9606 GN=USP54 PE=1 SV=4;sp|Q70EL1-10|UBP54_HU	1	3862	0	NaN	NaN	NaN	NaN	NaN	NaN	NaN	NaN	NaN	NaN	NaN	NaN	NaN	NaN	NaN	NaN	NaN
UID17993	S	4	___1	GQETESLDPPS(0.534)VPVNPALY(0.466)GNGLELQQLSTLDDR	0.534144	2.63e-16	91.748	75.3	91.748	0.37324	31402000	575	NaN	NaN	0.519197	NaN	NaN	0.534144	NaN	NaN	0.529496	Q71F56	575	Q71F56	Q71F56	Mediator of RNA polymerase II transcription subunit 13-like	MED13L	SPQPRGQETESLDPPSVPVNPALYGNGLELQ	sp|Q71F56|MD13L_HUMAN Mediator of RNA polymerase II transcription subunit 13-like OS=Homo sapiens OX=9606 GN=MED13L PE=1 SV=1	1	3871	0	NaN	NaN	NaN	NaN	NaN	NaN	NaN	NaN	NaN	NaN	NaN	NaN	NaN	NaN	NaN	NaN	NaN
UID18027	S	3	___1	NDREYDS(1)GDT(1)DEIIAMK	0.99998	1.83e-31	187.16	173.26	107.07	-0.06286	3526300000	310	0.999966	0.99998	0.999581	0.999632	0.999682	0.999953	0.999771	0.998365	0.993657	Q76FK4-2;Q76FK4-4;Q76FK4	310;378;378	Q76FK4-2	Q76FK4-2	Nucleolar protein 8	NOL8	HDSDDDIMRNDREYDSGDTDEIIAMKKNVAK	sp|Q76FK4-2|NOL8_HUMAN Isoform 2 of Nucleolar protein 8 OS=Homo sapiens OX=9606 GN=NOL8;sp|Q76FK4-4|NOL8_HUMAN Isoform 4 of Nucleolar protein 8 OS=Homo sapiens OX=9606 GN=NOL8;sp|Q76FK4|NOL8_HUMAN Nucleolar protein 8 OS=Homo sapiens OX=9606 GN=NOL8 PE=1 SV	1;2	3878	0	NaN	NaN	NaN	NaN	NaN	NaN	NaN	NaN	NaN	NaN	NaN	NaN	NaN	NaN	NaN	NaN	NaN
UID18089	S	4	___1	LT(0.205)PRPS(0.836)PS(0.941)PMIES(0.008)T(0.008)PMS(0.001)IAGDATPLLDEMDR	0.94122	1.87e-06	66.879	49.942	48.07	1.686	145030000	1703	NaN	0	0	NaN	0.516397	0.94122	NaN	0	NaN	Q7KZ85;Q7KZ85-3;Q7KZ85-2	1703;703;522	Q7KZ85	Q7KZ85	Transcription elongation factor SPT6	SUPT6H	ERRKQKQRLTPRPSPSPMIESTPMSIAGDAT	sp|Q7KZ85|SPT6H_HUMAN Transcription elongation factor SPT6 OS=Homo sapiens OX=9606 GN=SUPT6H PE=1 SV=2;sp|Q7KZ85-3|SPT6H_HUMAN Isoform 3 of Transcription elongation factor SPT6 OS=Homo sapiens OX=9606 GN=SUPT6H;sp|Q7KZ85-2|SPT6H_HUMAN Isoform 2 of Transcri	1;2	3884	0	NaN	NaN	NaN	NaN	NaN	NaN	NaN	NaN	NaN	NaN	NaN	NaN	NaN	NaN	NaN	NaN	NaN
UID18097	S	3	___1	AS(1)LGQASIQNGK	1	2.07e-08	125.5	95.294	125.5	-0.24204	26450000	459	NaN	NaN	NaN	NaN	NaN	1	NaN	NaN	NaN	Q7KZI7-12;Q7KZI7-3;Q7KZI7-6;Q7KZI7-11;Q7KZI7-8;Q7KZI7;Q7KZI7-10;Q7KZI7-7;Q7KZI7-2;Q7KZI7-5;Q7KZI7-4;Q7KZI7-9;Q7KZI7-14;Q7KZI7-13;Q7KZI7-15;Q7KZI7-16	460;460;460;493;493;493;460;460;460;493;493;493;459;459;492;492	Q7KZI7-12;Q7KZI7-14	Q7KZI7-14	Serine/threonine-protein kinase MARK2	MARK2	TSTNRSRNSPLLERASLGQASIQNGKDSLTM	sp|Q7KZI7-12|MARK2_HUMAN Isoform 12 of Serine/threonine-protein kinase MARK2 OS=Homo sapiens OX=9606 GN=MARK2;sp|Q7KZI7-3|MARK2_HUMAN Isoform 3 of Serine/threonine-protein kinase MARK2 OS=Homo sapiens OX=9606 GN=MARK2;sp|Q7KZI7-6|MARK2_HUMAN Isoform 6 of S	1	3886;3887	0	NaN	NaN	NaN	NaN	NaN	NaN	NaN	NaN	NaN	NaN	NaN	NaN	NaN	NaN	NaN	NaN	NaN
UID18110	S	3	___1	S(0.334)MS(0.655)AS(0.011)VHPNK	0.655059	0.000191529	98.182	68.855	93.614	-0.12092	109620000	501	0.499357	NaN	0.408272	0.383151	0.655059	0	NaN	0.377549	NaN	Q7KZI7-12;Q7KZI7-3;Q7KZI7-6;Q7KZI7-11;Q7KZI7-8;Q7KZI7;Q7KZI7-14	502;502;502;535;535;535;501	Q7KZI7-12;Q7KZI7-14	Q7KZI7-14	Serine/threonine-protein kinase MARK2	MARK2	AAVSAARPRQHQKSMSASVHPNKASGLPPTE	sp|Q7KZI7-12|MARK2_HUMAN Isoform 12 of Serine/threonine-protein kinase MARK2 OS=Homo sapiens OX=9606 GN=MARK2;sp|Q7KZI7-3|MARK2_HUMAN Isoform 3 of Serine/threonine-protein kinase MARK2 OS=Homo sapiens OX=9606 GN=MARK2;sp|Q7KZI7-6|MARK2_HUMAN Isoform 6 of S	1	3886;3887	0	NaN	NaN	NaN	NaN	NaN	NaN	NaN	NaN	NaN	NaN	NaN	NaN	NaN	NaN	NaN	NaN	NaN
UID18144	S	2	___1	DLS(0.947)S(0.053)EGQTK	0.947141	0.000493895	99.752	55.443	62.694	0.75402	215080000	50	0.947141	0.789072	0	NaN	0	0.88628	NaN	0.874689	NaN	Q7L2Z9	50	Q7L2Z9	Q7L2Z9	Centromere protein Q	CENPQ	VRNTVKKNKNHLKDLSSEGQTKHTNLKHGKT	sp|Q7L2Z9|CENPQ_HUMAN Centromere protein Q OS=Homo sapiens OX=9606 GN=CENPQ PE=1 SV=1	1	3898	0	NaN	NaN	NaN	NaN	NaN	NaN	NaN	NaN	NaN	NaN	NaN	NaN	NaN	NaN	NaN	NaN	NaN
UID18203	S	3	___1	HAEAT(0.135)LGS(0.865)GNLR	0.86463	0.000659953	78.038	57.932	53.193	-0.30603	556810000	38	NaN	NaN	0	0.86463	0	0.846051	NaN	0	NaN	Q9H8S9;Q7L9L4;Q7L9L4-2;Q9H8S9-2	38;38;43;38	Q9H8S9	Q9H8S9	MOB kinase activator 1A;MOB kinase activator 1B	MOB1A;MOB1B	SHQYELLKHAEATLGSGNLRQAVMLPEGEDL	sp|Q9H8S9|MOB1A_HUMAN MOB kinase activator 1A OS=Homo sapiens OX=9606 GN=MOB1A PE=1 SV=4;sp|Q7L9L4|MOB1B_HUMAN MOB kinase activator 1B OS=Homo sapiens OX=9606 GN=MOB1B PE=1 SV=3;sp|Q7L9L4-2|MOB1B_HUMAN Isoform 2 of MOB kinase activator 1B OS=Homo sapiens O	1	3915	0	NaN	NaN	NaN	NaN	NaN	NaN	NaN	NaN	NaN	NaN	NaN	NaN	NaN	NaN	NaN	NaN	NaN
UID18217	S	3	___1	RGS(1)RPPEIR	1	0.00575783	67.519	28.952	67.519	-0.46128	78333000	587	NaN	NaN	NaN	NaN	1	NaN	NaN	1	NaN	Q7LDG7;Q7LDG7-2	587;649	Q7LDG7	Q7LDG7	RAS guanyl-releasing protein 2	RASGRP2	HRAFSFSLPRPGRRGSRPPEIREEEVQTVED	sp|Q7LDG7|GRP2_HUMAN RAS guanyl-releasing protein 2 OS=Homo sapiens OX=9606 GN=RASGRP2 PE=1 SV=1;sp|Q7LDG7-2|GRP2_HUMAN Isoform 2 of RAS guanyl-releasing protein 2 OS=Homo sapiens OX=9606 GN=RASGRP2	1	3918	0	NaN	NaN	NaN	NaN	NaN	NaN	NaN	NaN	NaN	NaN	NaN	NaN	NaN	NaN	NaN	NaN	NaN
UID18272	S	3	___1	KFTYLGS(1)QDR	0.999964	0.00427154	65.472	50.206	65.472	0.13143	309550000	302	0	NaN	NaN	NaN	NaN	0.999964	NaN	NaN	NaN	Q7Z2W4-2;Q7Z2W4;Q7Z2W4-3	302;302;302	Q7Z2W4-2;Q7Z2W4-3	Q7Z2W4-2	Zinc finger CCCH-type antiviral protein 1	ZC3HAV1	DAPVDDLTRKFTYLGSQDRARPPSGSSKATD	sp|Q7Z2W4-2|ZCCHV_HUMAN Isoform 2 of Zinc finger CCCH-type antiviral protein 1 OS=Homo sapiens OX=9606 GN=ZC3HAV1;sp|Q7Z2W4|ZCCHV_HUMAN Zinc finger CCCH-type antiviral protein 1 OS=Homo sapiens OX=9606 GN=ZC3HAV1 PE=1 SV=3;sp|Q7Z2W4-3|ZCCHV_HUMAN Isoform 3	1	3928;3929	0	NaN	NaN	NaN	NaN	NaN	NaN	NaN	NaN	NaN	NaN	NaN	NaN	NaN	NaN	NaN	NaN	NaN
UID18286	S	3	___1	GLS(0.001)LS(0.999)PQS(1)PPER	1	0.000187917	92.773	82.138	92.773	-0.025223	534360000	1432	NaN	0.999748	0.999993	1	0.999998	1	NaN	NaN	0.999999	Q7Z2Z1-2;Q7Z2Z1	1432;1433	Q7Z2Z1-2	Q7Z2Z1-2	Treslin	TICRR	TDSRDDQKGLSLSPQSPPERRGYPGPGLRSD	sp|Q7Z2Z1-2|TICRR_HUMAN Isoform 2 of Treslin OS=Homo sapiens OX=9606 GN=TICRR;sp|Q7Z2Z1|TICRR_HUMAN Treslin OS=Homo sapiens OX=9606 GN=TICRR PE=1 SV=2	1;2	3930	0	NaN	NaN	NaN	NaN	NaN	NaN	NaN	NaN	NaN	NaN	NaN	NaN	NaN	NaN	NaN	NaN	NaN
UID18299	S	3	___1	SLLFGAMS(0.002)EMIS(0.981)PS(0.017)EK	0.980858	3.05e-06	117.65	87.227	117.65	3.4873	69022000	1077	0.980858	0.84864	NaN	NaN	NaN	0.970161	0.490345	NaN	NaN	Q7Z2Z1-2;Q7Z2Z1	1077;1078	Q7Z2Z1-2	Q7Z2Z1-2	Treslin	TICRR	RSPKSLLFGAMSEMISPSEKGSARMKKRSRN	sp|Q7Z2Z1-2|TICRR_HUMAN Isoform 2 of Treslin OS=Homo sapiens OX=9606 GN=TICRR;sp|Q7Z2Z1|TICRR_HUMAN Treslin OS=Homo sapiens OX=9606 GN=TICRR PE=1 SV=2	1	3930	0	NaN	NaN	NaN	NaN	NaN	NaN	NaN	NaN	NaN	NaN	NaN	NaN	NaN	NaN	NaN	NaN	NaN
UID18334	S	4	___1	SDTLT(0.001)DS(0.999)QIDRDLHK	0.999419	2.54e-51	208.47	174.68	208.47	0.12055	138530000	956	NaN	NaN	NaN	0	0.999419	0	NaN	0	NaN	Q7Z333-3;Q7Z333;Q7Z333-4	956;956;956	Q7Z333-3	Q7Z333-3	Probable helicase senataxin	SETX	EQAPDISPKSDTLTDSQIDRDLHKLSLLAQA	sp|Q7Z333-3|SETX_HUMAN Isoform 3 of Probable helicase senataxin OS=Homo sapiens OX=9606 GN=SETX;sp|Q7Z333|SETX_HUMAN Probable helicase senataxin OS=Homo sapiens OX=9606 GN=SETX PE=1 SV=4;sp|Q7Z333-4|SETX_HUMAN Isoform 4 of Probable helicase senataxin OS=Ho	1	3934	0	NaN	NaN	NaN	NaN	NaN	NaN	NaN	NaN	NaN	NaN	NaN	NaN	NaN	NaN	NaN	NaN	NaN
UID18353	S	4	___1	QLS(0.69)T(0.213)S(0.069)S(0.023)DS(0.003)PAPAS(0.001)S(0.001)S(0.001)S(0.001)QVTASTSQQPVR	0.689879	0.00136287	46.696	28.448	46.696	-0.011074	21472000	827	NaN	NaN	NaN	NaN	0.689879	NaN	NaN	NaN	NaN	Q7Z3B3;Q7Z3B3-4;Q7Z3B3-2	827;95;158	Q7Z3B3	Q7Z3B3	KAT8 regulatory NSL complex subunit 1	KANSL1	AATHHPPHSPLVRQLSTSSDSPAPASSSSQV	sp|Q7Z3B3|KANL1_HUMAN KAT8 regulatory NSL complex subunit 1 OS=Homo sapiens OX=9606 GN=KANSL1 PE=1 SV=2;sp|Q7Z3B3-4|KANL1_HUMAN Isoform 3 of KAT8 regulatory NSL complex subunit 1 OS=Homo sapiens OX=9606 GN=KANSL1;sp|Q7Z3B3-2|KANL1_HUMAN Isoform 2 of KAT8 r	1	3935	0	NaN	NaN	NaN	NaN	NaN	NaN	NaN	NaN	NaN	NaN	NaN	NaN	NaN	NaN	NaN	NaN	NaN
UID18456	S	4	___1	VIQYLAHVAS(0.5)S(0.5)PK	0.499989	0.00306949	64.121	37.006	64.121	-0.51229	5411300	220	NaN	NaN	NaN	NaN	0.499989	NaN	NaN	NaN	NaN	Q7Z406;Q7Z406-6;Q7Z406-2;Q7Z406-4;Q7Z406-5	220;220;220;220;220	Q7Z406	Q7Z406	Myosin-14	MYH14	TENTKKVIQYLAHVASSPKGRKEPGVPGELE	sp|Q7Z406|MYH14_HUMAN Myosin-14 OS=Homo sapiens OX=9606 GN=MYH14 PE=1 SV=2;sp|Q7Z406-6|MYH14_HUMAN Isoform 6 of Myosin-14 OS=Homo sapiens OX=9606 GN=MYH14;sp|Q7Z406-2|MYH14_HUMAN Isoform 2 of Myosin-14 OS=Homo sapiens OX=9606 GN=MYH14;sp|Q7Z406-4|MYH14_HUM	1	3954	0	NaN	NaN	NaN	NaN	NaN	NaN	NaN	NaN	NaN	NaN	NaN	NaN	NaN	NaN	NaN	NaN	NaN
UID18457	S	4	___1	VIQYLAHVAS(0.207)S(0.793)PK	0.793461	0.00126328	70.41	42.242	70.41	-0.30548	17131000	221	NaN	NaN	NaN	NaN	0.499989	NaN	NaN	0.793461	NaN	Q7Z406;Q7Z406-6;Q7Z406-2;Q7Z406-4;Q7Z406-5	221;221;221;221;221	Q7Z406	Q7Z406	Myosin-14	MYH14	ENTKKVIQYLAHVASSPKGRKEPGVPGELER	sp|Q7Z406|MYH14_HUMAN Myosin-14 OS=Homo sapiens OX=9606 GN=MYH14 PE=1 SV=2;sp|Q7Z406-6|MYH14_HUMAN Isoform 6 of Myosin-14 OS=Homo sapiens OX=9606 GN=MYH14;sp|Q7Z406-2|MYH14_HUMAN Isoform 2 of Myosin-14 OS=Homo sapiens OX=9606 GN=MYH14;sp|Q7Z406-4|MYH14_HUM	1	3954	0	NaN	NaN	NaN	NaN	NaN	NaN	NaN	NaN	NaN	NaN	NaN	NaN	NaN	NaN	NaN	NaN	NaN
UID18506	S	3	___1	RQS(0.588)S(0.77)GS(0.636)AT(0.006)NVASTPDNR	0.770056	1.17e-93	242.53	225.85	57.293	2.2947	524460000	647	0.679956	0.634508	0.770056	0	0.58541	0	0.735495	0.699913	0.42773	Q7Z460;Q7Z460-4	647;663	Q7Z460;Q7Z460-4	Q7Z460	CLIP-associating protein 1	CLASP1	GSYASLGRIRTRRQSSGSATNVASTPDNRGR;YIGLDSGRIRTRRQSSGSATNVASTPDNRGR	sp|Q7Z460|CLAP1_HUMAN CLIP-associating protein 1 OS=Homo sapiens OX=9606 GN=CLASP1 PE=1 SV=1;sp|Q7Z460-4|CLAP1_HUMAN Isoform 4 of CLIP-associating protein 1 OS=Homo sapiens OX=9606 GN=CLASP1	1;2	3959;3960	0	NaN	NaN	NaN	NaN	NaN	NaN	NaN	NaN	NaN	NaN	NaN	NaN	NaN	NaN	NaN	NaN	NaN
UID18525	S	3	___1	VSSSSGTTPFSSAAALPPGS(0.073)Y(0.001)AS(0.824)LES(0.101)R	0.824381	8.03e-29	138.96	129.91	105.7	0.22872	941080000	636	0.824381	0	NaN	0	0.698646	NaN	NaN	0.704102	NaN	Q7Z460-4	636	Q7Z460-4	Q7Z460-4	CLIP-associating protein 1	CLASP1	TPFSSAAALPPGSYASLESRHMREDMEYIGL	sp|Q7Z460-4|CLAP1_HUMAN Isoform 4 of CLIP-associating protein 1 OS=Homo sapiens OX=9606 GN=CLASP1	1	3960	0	NaN	NaN	NaN	NaN	NaN	NaN	NaN	NaN	NaN	NaN	NaN	NaN	NaN	NaN	NaN	NaN	NaN
UID18536	S	3	___1	GDSDTLGALHDLANS(0.953)PAS(0.046)FLS(0.001)QSVSSSDR	0.952768	1.05e-10	87.339	73.323	87.339	1.1536	2896500	459	NaN	NaN	NaN	NaN	NaN	0.952768	NaN	NaN	NaN	Q7Z4H7;Q7Z4H7-2;Q7Z4H7-3	459;459;424	Q7Z4H7;Q7Z4H7-3	Q7Z4H7	HAUS augmin-like complex subunit 6	HAUS6	RGDSDTLGALHDLANSPASFLSQSVSSSDRN	sp|Q7Z4H7|HAUS6_HUMAN HAUS augmin-like complex subunit 6 OS=Homo sapiens OX=9606 GN=HAUS6 PE=1 SV=2;sp|Q7Z4H7-2|HAUS6_HUMAN Isoform 2 of HAUS augmin-like complex subunit 6 OS=Homo sapiens OX=9606 GN=HAUS6;sp|Q7Z4H7-3|HAUS6_HUMAN Isoform 3 of HAUS augmin-li	1	3963;3964	0	NaN	NaN	NaN	NaN	NaN	NaN	NaN	NaN	NaN	NaN	NaN	NaN	NaN	NaN	NaN	NaN	NaN
UID18541	S	3	___1	LEPNS(1)PMHGGTLLEDVVGGR	1	1.47e-13	137.9	120.41	137.9	-0.50383	202210000	805	0	0.979933	0.999999	NaN	0.999993	0.999455	1	NaN	NaN	Q7Z4H7;Q7Z4H7-3	805;770	Q7Z4H7;Q7Z4H7-3	Q7Z4H7	HAUS augmin-like complex subunit 6	HAUS6	NSSSSSEANFKLEPNSPMHGGTLLEDVVGGR	sp|Q7Z4H7|HAUS6_HUMAN HAUS augmin-like complex subunit 6 OS=Homo sapiens OX=9606 GN=HAUS6 PE=1 SV=2;sp|Q7Z4H7-3|HAUS6_HUMAN Isoform 3 of HAUS augmin-like complex subunit 6 OS=Homo sapiens OX=9606 GN=HAUS6	1	3963;3964	0	NaN	NaN	NaN	NaN	NaN	NaN	NaN	NaN	NaN	NaN	NaN	NaN	NaN	NaN	NaN	NaN	NaN
UID18554	S	3	___1	QS(0.5)S(0.5)LSEK	0.499982	0.00867233	74.92	23.854	74.92	0.0054672	71984000	1192	NaN	NaN	0.499982	NaN	NaN	0.499982	NaN	NaN	NaN	Q7Z4S6-6;Q7Z4S6-3;Q7Z4S6-5;Q7Z4S6-2;Q7Z4S6;Q7Z4S6-4	1192;1228;1208;1215;1228;1228	Q7Z4S6-6	Q7Z4S6-6	Kinesin-like protein KIF21A	KIF21A	PPPGLPSKIGSISRQSSLSEKKIPEPSPVTR	sp|Q7Z4S6-6|KI21A_HUMAN Isoform 6 of Kinesin-like protein KIF21A OS=Homo sapiens OX=9606 GN=KIF21A;sp|Q7Z4S6-3|KI21A_HUMAN Isoform 3 of Kinesin-like protein KIF21A OS=Homo sapiens OX=9606 GN=KIF21A;sp|Q7Z4S6-5|KI21A_HUMAN Isoform 5 of Kinesin-like protein	1	3966	0	NaN	NaN	NaN	NaN	NaN	NaN	NaN	NaN	NaN	NaN	NaN	NaN	NaN	NaN	NaN	NaN	NaN
UID18567	S	3	___1	GS(1)GGS(1)S(1)GDELREDDEPVKK	1	1.41e-28	152.21	115.63	60.317	0.32138	52658000000	369	1	1	1	1	1	1	1	1	1	Q7Z4V5-2;Q7Z4V5-4;Q7Z4V5;Q7Z4V5-3	369;369;369;369	Q7Z4V5-2	Q7Z4V5-2	Hepatoma-derived growth factor-related protein 2	HDGFRP2	RERADRGEAERGSGGSSGDELREDDEPVKKR	sp|Q7Z4V5-2|HDGR2_HUMAN Isoform 2 of Hepatoma-derived growth factor-related protein 2 OS=Homo sapiens OX=9606 GN=HDGFL2;sp|Q7Z4V5-4|HDGR2_HUMAN Isoform 4 of Hepatoma-derived growth factor-related protein 2 OS=Homo sapiens OX=9606 GN=HDGFL2;sp|Q7Z4V5|HDGR2_	1;2;3	3967	0	NaN	NaN	NaN	NaN	NaN	NaN	NaN	NaN	NaN	NaN	NaN	NaN	NaN	NaN	NaN	NaN	NaN
UID18594	S	3	___1	S(0.999)PRPAS(0.908)PAS(0.092)NVVVLPSGSTVYVK	0.99936	3.71e-22	143.82	113.9	136	0.50309	2621000000	168	0.998795	0.998171	0.954287	0.99382	0.990096	0	0.99936	0.996222	0.998479	Q7Z589;Q7Z589-5;Q7Z589-7;Q7Z589-6;Q7Z589-4;Q7Z589-2	168;169;183;182;183;168	Q7Z589	Q7Z589	Protein EMSY	EMSY	PTSTPVPSGSIATVKSPRPASPASNVVVLPS	sp|Q7Z589|EMSY_HUMAN BRCA2-interacting transcriptional repressor EMSY OS=Homo sapiens OX=9606 GN=EMSY PE=1 SV=2;sp|Q7Z589-5|EMSY_HUMAN Isoform 5 of BRCA2-interacting transcriptional repressor EMSY OS=Homo sapiens OX=9606 GN=EMSY;sp|Q7Z589-7|EMSY_HUMAN Isof	1;2	3969	0	NaN	NaN	NaN	NaN	NaN	NaN	NaN	NaN	NaN	NaN	NaN	NaN	NaN	NaN	NaN	NaN	NaN
UID18621	S	3	___1	APGAS(1)PGNPLSPSLSDK	0.999998	5.14e-05	97.256	78.198	97.256	0.1248	102660000	1352	0.890824	NaN	0	0	NaN	0.999998	NaN	NaN	0	Q7Z5J4;Q7Z5J4-3;Q7Z5J4-2	1352;1352;1305	Q7Z5J4	Q7Z5J4	Retinoic acid-induced protein 1	RAI1	TSPSLKKFACKAPGASPGNPLSPSLSDKDRG	sp|Q7Z5J4|RAI1_HUMAN Retinoic acid-induced protein 1 OS=Homo sapiens OX=9606 GN=RAI1 PE=1 SV=2;sp|Q7Z5J4-3|RAI1_HUMAN Isoform 3 of Retinoic acid-induced protein 1 OS=Homo sapiens OX=9606 GN=RAI1;sp|Q7Z5J4-2|RAI1_HUMAN Isoform 2 of Retinoic acid-induced pro	1	3972	0	NaN	NaN	NaN	NaN	NaN	NaN	NaN	NaN	NaN	NaN	NaN	NaN	NaN	NaN	NaN	NaN	NaN
UID18645	S	4	___1	T(0.226)APS(0.217)PS(0.508)LQPPPES(0.01)NDNS(0.01)QDS(0.01)QS(0.01)GT(0.01)NNAEDLPGVPESVK	0.508195	0.0001011	47.77	37.532	40.407	-0.29539	36595000	530	NaN	NaN	0.453939	0	0.431607	0.508195	NaN	NaN	NaN	Q7Z5K2-2	530	Q7Z5K2-2	Q7Z5K2-2	Wings apart-like protein homolog	WAPAL	ERKTSKKRTKTAPSPSLQPPPESNDNSQDSQ	sp|Q7Z5K2-2|WAPL_HUMAN Isoform 2 of Wings apart-like protein homolog OS=Homo sapiens OX=9606 GN=WAPL	1	3973	0	NaN	NaN	NaN	NaN	NaN	NaN	NaN	NaN	NaN	NaN	NaN	NaN	NaN	NaN	NaN	NaN	NaN
UID18656	S	2	___1	NS(0.001)NS(0.011)PPS(0.119)PS(0.68)S(0.189)MNQR	0.679512	4.64e-06	115.6	102.01	46.73	-0.0017935	722000000	462	0	0.430442	0.637347	0	0.525477	0.679512	0.525092	0.596474	0	Q7Z5L9;Q7Z5L9-2;Q7Z5L9-3	462;446;38	Q7Z5L9	Q7Z5L9	Interferon regulatory factor 2-binding protein 2	IRF2BP2	VHSTTRRNSNSPPSPSSMNQRRLGPREVGGQ	sp|Q7Z5L9|I2BP2_HUMAN Interferon regulatory factor 2-binding protein 2 OS=Homo sapiens OX=9606 GN=IRF2BP2 PE=1 SV=2;sp|Q7Z5L9-2|I2BP2_HUMAN Isoform 2 of Interferon regulatory factor 2-binding protein 2 OS=Homo sapiens OX=9606 GN=IRF2BP2;sp|Q7Z5L9-3|I2BP2_H	1;2	3975	0	NaN	NaN	NaN	NaN	NaN	NaN	NaN	NaN	NaN	NaN	NaN	NaN	NaN	NaN	NaN	NaN	NaN
UID18667	S	4	___1	S(0.83)LT(0.17)NLVAAGDDVLEDQEILMHHPPQVDELDR	0.829686	1.83e-11	86.544	73.955	86.544	-0.35035	53651000	208	NaN	0	NaN	0.829686	0.76628	NaN	NaN	NaN	NaN	Q7Z5Y7-2;Q7Z5Y7-3;Q7Z5Y7	208;229;374	Q7Z5Y7-2	Q7Z5Y7-2	BTB/POZ domain-containing protein KCTD20	KCTD20	EGKSRHVDFQCVRSKSLTNLVAAGDDVLEDQ	sp|Q7Z5Y7-2|KCD20_HUMAN Isoform 2 of BTB/POZ domain-containing protein KCTD20 OS=Homo sapiens OX=9606 GN=KCTD20;sp|Q7Z5Y7-3|KCD20_HUMAN Isoform 3 of BTB/POZ domain-containing protein KCTD20 OS=Homo sapiens OX=9606 GN=KCTD20;sp|Q7Z5Y7|KCD20_HUMAN BTB/POZ do	1	3978	0	NaN	NaN	NaN	NaN	NaN	NaN	NaN	NaN	NaN	NaN	NaN	NaN	NaN	NaN	NaN	NaN	NaN
UID18677	S	3	___1	GKYPDPSEDADS(0.165)S(0.597)Y(0.237)VR	0.597235	0.000339131	85.518	67.694	85.518	0.16692	52702000	247	NaN	NaN	0	NaN	0.597235	NaN	NaN	NaN	NaN	Q7Z698-2;Q7Z698	247;250	Q7Z698-2	Q7Z698-2	Sprouty-related, EVH1 domain-containing protein 2	SPRED2	PVRGKYPDPSEDADSSYVRFAKGEVPKHDYN	sp|Q7Z698-2|SPRE2_HUMAN Isoform 2 of Sprouty-related, EVH1 domain-containing protein 2 OS=Homo sapiens OX=9606 GN=SPRED2;sp|Q7Z698|SPRE2_HUMAN Sprouty-related, EVH1 domain-containing protein 2 OS=Homo sapiens OX=9606 GN=SPRED2 PE=1 SV=2	1	3981	0	NaN	NaN	NaN	NaN	NaN	NaN	NaN	NaN	NaN	NaN	NaN	NaN	NaN	NaN	NaN	NaN	NaN
UID18682	S	2	___1	TQPS(0.02)S(0.98)LK	0.97969	0.013421	91.867	36.405	75.294	-0.062601	549510000	317	NaN	NaN	NaN	0.97969	0.733192	NaN	NaN	NaN	NaN	Q7Z699	317	Q7Z699	Q7Z699	Sprouty-related, EVH1 domain-containing protein 1	SPRED1	LSSPKDSVVFKTQPSSLKIKKSKRRKEDGER	sp|Q7Z699|SPRE1_HUMAN Sprouty-related, EVH1 domain-containing protein 1 OS=Homo sapiens OX=9606 GN=SPRED1 PE=1 SV=2	1	3982	0	NaN	NaN	NaN	NaN	NaN	NaN	NaN	NaN	NaN	NaN	NaN	NaN	NaN	NaN	NaN	NaN	NaN
UID18694	S	4	___1	S(0.064)T(0.093)S(0.704)S(0.135)S(0.004)SDTMSTFKPMVAPR	0.704457	1.34e-56	190.79	172.24	190.79	-0.49642	214810000	1006	0	0.282888	NaN	0.409284	0.704457	0.397983	0.48905	0	0	Q7Z6B7-2;Q7Z6B7	1006;1029	Q7Z6B7-2	Q7Z6B7-2	SLIT-ROBO Rho GTPase-activating protein 1	SRGAP1	NVALRSSEPQIRRSTSSSSDTMSTFKPMVAP	sp|Q7Z6B7-2|SRGP1_HUMAN Isoform 2 of SLIT-ROBO Rho GTPase-activating protein 1 OS=Homo sapiens OX=9606 GN=SRGAP1;sp|Q7Z6B7|SRGP1_HUMAN SLIT-ROBO Rho GTPase-activating protein 1 OS=Homo sapiens OX=9606 GN=SRGAP1 PE=1 SV=1	1	3984	0	NaN	NaN	NaN	NaN	NaN	NaN	NaN	NaN	NaN	NaN	NaN	NaN	NaN	NaN	NaN	NaN	NaN
UID18707	S	4	___1	VTGTEGSSSTLVDYTS(0.001)T(0.005)S(0.158)S(0.834)T(0.797)GGS(0.204)PVRK	0.83411	2.64e-192	258.25	235.03	152.16	0.16909	1925900000	1239	0.83411	0.475223	0.536597	NaN	0	0.695286	0.621595	0.817025	0.602188	Q7Z6E9-2;Q7Z6E9	1239;1273	Q7Z6E9-2	Q7Z6E9-2	E3 ubiquitin-protein ligase RBBP6	RBBP6	TEGSSSTLVDYTSTSSTGGSPVRKSEEKTDT	sp|Q7Z6E9-2|RBBP6_HUMAN Isoform 2 of E3 ubiquitin-protein ligase RBBP6 OS=Homo sapiens OX=9606 GN=RBBP6;sp|Q7Z6E9|RBBP6_HUMAN E3 ubiquitin-protein ligase RBBP6 OS=Homo sapiens OX=9606 GN=RBBP6 PE=1 SV=1	1;2	3985	0	NaN	NaN	NaN	NaN	NaN	NaN	NaN	NaN	NaN	NaN	NaN	NaN	NaN	NaN	NaN	NaN	NaN
UID18711	S	2	___1	LS(0.236)S(0.764)DLTR	0.763693	0.00895978	103.19	37.313	84.522	0.17203	579890000	1592	0.49978	NaN	0.740826	0.497799	0.763693	0.499778	NaN	NaN	NaN	Q7Z6E9-2;Q7Z6E9;Q7Z6E9-4	1592;1626;786	Q7Z6E9-2	Q7Z6E9-2	E3 ubiquitin-protein ligase RBBP6	RBBP6	TVKPKPQLSHSSRLSSDLTRETDEAAFEPDY	sp|Q7Z6E9-2|RBBP6_HUMAN Isoform 2 of E3 ubiquitin-protein ligase RBBP6 OS=Homo sapiens OX=9606 GN=RBBP6;sp|Q7Z6E9|RBBP6_HUMAN E3 ubiquitin-protein ligase RBBP6 OS=Homo sapiens OX=9606 GN=RBBP6 PE=1 SV=1;sp|Q7Z6E9-4|RBBP6_HUMAN Isoform 4 of E3 ubiquitin-pro	1	3985	0	NaN	NaN	NaN	NaN	NaN	NaN	NaN	NaN	NaN	NaN	NaN	NaN	NaN	NaN	NaN	NaN	NaN
UID18767	S	4	___1	REESPMDVDQPS(0.063)PS(0.916)AQDT(0.01)QS(0.01)IASDGTPQGEK	0.916459	1.48e-90	198.83	184.98	82.992	0.32839	256280000	3802	0.916459	0.30227	0.441915	0.300436	0.499999	0.248462	NaN	0.192547	0	Q7Z6Z7-2;Q7Z6Z7-3;Q7Z6Z7	3802;3809;3818	Q7Z6Z7-2	Q7Z6Z7-2	E3 ubiquitin-protein ligase HUWE1	HUWE1	VRREESPMDVDQPSPSAQDTQSIASDGTPQG	sp|Q7Z6Z7-2|HUWE1_HUMAN Isoform 2 of E3 ubiquitin-protein ligase HUWE1 OS=Homo sapiens OX=9606 GN=HUWE1;sp|Q7Z6Z7-3|HUWE1_HUMAN Isoform 3 of E3 ubiquitin-protein ligase HUWE1 OS=Homo sapiens OX=9606 GN=HUWE1;sp|Q7Z6Z7|HUWE1_HUMAN E3 ubiquitin-protein ligas	1	3995	0	NaN	NaN	NaN	NaN	NaN	NaN	NaN	NaN	NaN	NaN	NaN	NaN	NaN	NaN	NaN	NaN	NaN
UID18829	S	3	___1	KDS(0.269)LPDADLAS(0.731)CGSLSQSSASFFTPR	0.730676	5.69e-39	157.26	140.19	157.26	-0.031379	147780000	521	NaN	0	NaN	NaN	NaN	0.730676	0	0	0	Q86SQ0-2;Q86SQ0;Q86SQ0-3	521;521;548	Q86SQ0-2	Q86SQ0-2	Pleckstrin homology-like domain family B member 2	PHLDB2	YRCHRKDSLPDADLASCGSLSQSSASFFTPR	sp|Q86SQ0-2|PHLB2_HUMAN Isoform 2 of Pleckstrin homology-like domain family B member 2 OS=Homo sapiens OX=9606 GN=PHLDB2;sp|Q86SQ0|PHLB2_HUMAN Pleckstrin homology-like domain family B member 2 OS=Homo sapiens OX=9606 GN=PHLDB2 PE=1 SV=2;sp|Q86SQ0-3|PHLB2_H	1	4007	0	NaN	NaN	NaN	NaN	NaN	NaN	NaN	NaN	NaN	NaN	NaN	NaN	NaN	NaN	NaN	NaN	NaN
UID18840	S	3	___1	NFS(0.919)CGS(0.081)VEFDEADLESLR	0.918863	3.67e-05	95.153	82.116	86.08	0.020219	85063000	384	0.714673	NaN	NaN	NaN	0.745961	0	NaN	0.918863	NaN	Q86SQ0-2;Q86SQ0;Q86SQ0-3	384;384;411	Q86SQ0-2	Q86SQ0-2	Pleckstrin homology-like domain family B member 2	PHLDB2	LAGESDRVFATRRNFSCGSVEFDEADLESLR	sp|Q86SQ0-2|PHLB2_HUMAN Isoform 2 of Pleckstrin homology-like domain family B member 2 OS=Homo sapiens OX=9606 GN=PHLDB2;sp|Q86SQ0|PHLB2_HUMAN Pleckstrin homology-like domain family B member 2 OS=Homo sapiens OX=9606 GN=PHLDB2 PE=1 SV=2;sp|Q86SQ0-3|PHLB2_H	1	4007	0	NaN	NaN	NaN	NaN	NaN	NaN	NaN	NaN	NaN	NaN	NaN	NaN	NaN	NaN	NaN	NaN	NaN
UID18875	S	3	___1	VPGFVGS(1)PLAAMNPK	1	0.000197546	84.842	66.062	64.565	0.05697	101440000	261	1	NaN	1	NaN	1	1	NaN	NaN	NaN	Q86TB9-4;Q86TB9;Q86TB9-2	261;291;148	Q86TB9-4	Q86TB9-4	Protein PAT1 homolog 1	PATL1	RMSPSQFARVPGFVGSPLAAMNPKLLQGRVG	sp|Q86TB9-4|PATL1_HUMAN Isoform 4 of Protein PAT1 homolog 1 OS=Homo sapiens OX=9606 GN=PATL1;sp|Q86TB9|PATL1_HUMAN Protein PAT1 homolog 1 OS=Homo sapiens OX=9606 GN=PATL1 PE=1 SV=2;sp|Q86TB9-2|PATL1_HUMAN Isoform 2 of Protein PAT1 homolog 1 OS=Homo sapiens	1	4016	0	NaN	NaN	NaN	NaN	NaN	NaN	NaN	NaN	NaN	NaN	NaN	NaN	NaN	NaN	NaN	NaN	NaN
UID18878	S	3	___1	ANT(0.326)LS(0.674)HFPIECQEPPQPAR	0.674159	2.78e-10	128.97	118.34	128.97	-0.33729	76121000	598	NaN	NaN	NaN	NaN	NaN	0.674159	NaN	NaN	NaN	Q86TI0-2;Q86TI0	598;598	Q86TI0-2	Q86TI0-2	TBC1 domain family member 1	TBC1D1	PLSPQQAFRRRANTLSHFPIECQEPPQPARG	sp|Q86TI0-2|TBCD1_HUMAN Isoform 2 of TBC1 domain family member 1 OS=Homo sapiens OX=9606 GN=TBC1D1;sp|Q86TI0|TBCD1_HUMAN TBC1 domain family member 1 OS=Homo sapiens OX=9606 GN=TBC1D1 PE=1 SV=2	1	4018	0	NaN	NaN	NaN	NaN	NaN	NaN	NaN	NaN	NaN	NaN	NaN	NaN	NaN	NaN	NaN	NaN	NaN
UID18965	S	3	___1	ISDYFEFAGGS(1)APGTSPGR	0.999929	1.9e-07	107.88	94.422	107.88	0.45833	175210000	94	0	NaN	0.99964	NaN	0.928618	0.999929	0.97747	0.997489	0.917734	Q86UE8;Q86UE8-2	94;94	Q86UE8	Q86UE8	Serine/threonine-protein kinase tousled-like 2	TLK2	PRGHKISDYFEFAGGSAPGTSPGRSVPPVAR	sp|Q86UE8|TLK2_HUMAN Serine/threonine-protein kinase tousled-like 2 OS=Homo sapiens OX=9606 GN=TLK2 PE=1 SV=2;sp|Q86UE8-2|TLK2_HUMAN Isoform 2 of Serine/threonine-protein kinase tousled-like 2 OS=Homo sapiens OX=9606 GN=TLK2	1;2	4036	0	NaN	NaN	NaN	NaN	NaN	NaN	NaN	NaN	NaN	NaN	NaN	NaN	NaN	NaN	NaN	NaN	NaN
UID19013	S	4	___1	RPSDLTISINQMGS(1)PGMGHLK	0.999747	2.08e-10	108.01	88.931	61.181	-0.26493	338560000	926	NaN	NaN	0	NaN	0.99967	0.999747	0.999714	0.98997	0	Q86UU0-4;Q86UU0-2;Q86UU0;Q86UU0-3	926;921;926;926	Q86UU0-4	Q86UU0-4	B-cell CLL/lymphoma 9-like protein	BCL9L	GRRPSDLTISINQMGSPGMGHLKSPTLSQVH	sp|Q86UU0-4|BCL9L_HUMAN Isoform 4 of B-cell CLL/lymphoma 9-like protein OS=Homo sapiens OX=9606 GN=BCL9L;sp|Q86UU0-2|BCL9L_HUMAN Isoform 2 of B-cell CLL/lymphoma 9-like protein OS=Homo sapiens OX=9606 GN=BCL9L;sp|Q86UU0|BCL9L_HUMAN B-cell CLL/lymphoma 9-li	1;2	4045	0	NaN	NaN	NaN	NaN	NaN	NaN	NaN	NaN	NaN	NaN	NaN	NaN	NaN	NaN	NaN	NaN	NaN
UID19055	S	2	___1	T(0.019)FS(0.981)DGLATR	0.981482	0.000557567	122.77	106.47	122.77	0.10654	222630000	430	NaN	NaN	NaN	0.981482	0.978539	0.757295	NaN	NaN	NaN	Q86UU1-3;Q86UU1-2;Q86UU1	430;430;430	Q86UU1-3	Q86UU1-3	Pleckstrin homology-like domain family B member 1	PHLDB1	VLTTSPSRQLVGRTFSDGLATRTLQPPESPR	sp|Q86UU1-3|PHLB1_HUMAN Isoform 3 of Pleckstrin homology-like domain family B member 1 OS=Homo sapiens OX=9606 GN=PHLDB1;sp|Q86UU1-2|PHLB1_HUMAN Isoform 2 of Pleckstrin homology-like domain family B member 1 OS=Homo sapiens OX=9606 GN=PHLDB1;sp|Q86UU1|PHLB	1	4046	0	NaN	NaN	NaN	NaN	NaN	NaN	NaN	NaN	NaN	NaN	NaN	NaN	NaN	NaN	NaN	NaN	NaN
UID19118	S	3	___1	AQT(0.003)GPLRS(0.123)S(0.875)LEESPFEA	0.874655	1.15e-06	114.46	98.57	105.32	0.080371	58400000	168	0.484991	0	0.833865	0.491114	0.817036	0.874655	0	NaN	0.470106	Q86V88	168	Q86V88	Q86V88	Magnesium-dependent phosphatase 1	MDP1	GLETFAKAQTGPLRSSLEESPFEA_______	sp|Q86V88|MGDP1_HUMAN Magnesium-dependent phosphatase 1 OS=Homo sapiens OX=9606 GN=MDP1 PE=1 SV=1	1	4058	0	NaN	NaN	NaN	NaN	NaN	NaN	NaN	NaN	NaN	NaN	NaN	NaN	NaN	NaN	NaN	NaN	NaN
UID19120	S	3	___1	ERES(1)PPPSALQPVQLPR	0.999956	2.23e-05	108.99	90.156	108.99	-0.49971	228170000	202	NaN	NaN	NaN	NaN	0.999956	NaN	NaN	NaN	NaN	Q86VE0	202	Q86VE0	Q86VE0	Myb-related transcription factor, partner of profilin	MYPOP	CTPQEGGCPRPKERESPPPSALQPVQLPRLA	sp|Q86VE0|MYPOP_HUMAN Myb-related transcription factor, partner of profilin OS=Homo sapiens OX=9606 GN=MYPOP PE=1 SV=2	1	4059	0	NaN	NaN	NaN	NaN	NaN	NaN	NaN	NaN	NaN	NaN	NaN	NaN	NaN	NaN	NaN	NaN	NaN
UID19153	S	2	___1	SQDQDS(1)EVNELSR	1	1.64e-78	220.85	177.08	220.85	2.2554	184260000	83	NaN	NaN	NaN	0	0	0.999931	NaN	1	0.999999	Q86VM9;Q86VM9-2	83;83	Q86VM9	Q86VM9	Zinc finger CCCH domain-containing protein 18	ZC3H18	DEEDRASEPKSQDQDSEVNELSRGPTSSPCE	sp|Q86VM9|ZCH18_HUMAN Zinc finger CCCH domain-containing protein 18 OS=Homo sapiens OX=9606 GN=ZC3H18 PE=1 SV=2;sp|Q86VM9-2|ZCH18_HUMAN Isoform 2 of Zinc finger CCCH domain-containing protein 18 OS=Homo sapiens OX=9606 GN=ZC3H18	1	4065	0	NaN	NaN	NaN	NaN	NaN	NaN	NaN	NaN	NaN	NaN	NaN	NaN	NaN	NaN	NaN	NaN	NaN
UID19154	S	4	___1	S(0.014)S(0.014)QQPS(0.514)T(0.456)PQQAPPGQPQQGT(0.001)FVAHK	0.514208	0.00284039	50.229	33.081	50.229	0.19868	166030000	795	NaN	NaN	NaN	NaN	NaN	0.514208	NaN	NaN	0	Q86VM9	795	Q86VM9	Q86VM9	Zinc finger CCCH domain-containing protein 18	ZC3H18	KSAKPPAGGKSSQQPSTPQQAPPGQPQQGTF	sp|Q86VM9|ZCH18_HUMAN Zinc finger CCCH domain-containing protein 18 OS=Homo sapiens OX=9606 GN=ZC3H18 PE=1 SV=2	1	4065	0	NaN	NaN	NaN	NaN	NaN	NaN	NaN	NaN	NaN	NaN	NaN	NaN	NaN	NaN	NaN	NaN	NaN
UID19178	S	4	___1	GS(0.545)QHS(0.408)PT(0.046)RPPVAAAAASLGSLPGPGAAR	0.545332	5.46e-17	106.94	80.935	105.66	-0.027555	49217000	76	NaN	NaN	NaN	NaN	0.545332	0.481204	NaN	NaN	NaN	Q86VQ1	76	Q86VQ1	Q86VQ1	Glucocorticoid-induced transcript 1 protein	GLCCI1	LQPIRATVPYQLLRGSQHSPTRPPVAAAAAS	sp|Q86VQ1|GLCI1_HUMAN Glucocorticoid-induced transcript 1 protein OS=Homo sapiens OX=9606 GN=GLCCI1 PE=1 SV=1	1	4071	0	NaN	NaN	NaN	NaN	NaN	NaN	NaN	NaN	NaN	NaN	NaN	NaN	NaN	NaN	NaN	NaN	NaN
UID19228	S	4	___1	GGVEVLESCQGSSNGAQDQEAS(0.001)EQFGS(0.999)PVAER	0.99897	1.67e-21	99.143	85.688	99.143	-0.22751	82192000	498	NaN	NaN	0	NaN	NaN	0.99897	NaN	NaN	NaN	Q86W50	498	Q86W50	Q86W50	Methyltransferase-like protein 16	METTL16	SSNGAQDQEASEQFGSPVAERGKRLPGVAGQ	sp|Q86W50|MET16_HUMAN RNA N6-adenosine-methyltransferase METTL16 OS=Homo sapiens OX=9606 GN=METTL16 PE=1 SV=2	1	4080	0	NaN	NaN	NaN	NaN	NaN	NaN	NaN	NaN	NaN	NaN	NaN	NaN	NaN	NaN	NaN	NaN	NaN
UID19311	S	3	___1	SSTFPQTDVLS(0.177)S(0.528)S(0.296)LEAEHR	0.52757	8.09e-86	211.92	186.41	211.92	-0.0046231	224240000	209	NaN	NaN	NaN	NaN	NaN	0.52757	NaN	NaN	NaN	Q86WP2-4;Q86WP2-3;Q86WP2;Q86WP2-2	209;372;380;387	Q86WP2-4	Q86WP2-4	Vasculin	GPBP1	QIIRSSTFPQTDVLSSSLEAEHRLLKEMGWQ	sp|Q86WP2-4|GPBP1_HUMAN Isoform 4 of Vasculin OS=Homo sapiens OX=9606 GN=GPBP1;sp|Q86WP2-3|GPBP1_HUMAN Isoform 3 of Vasculin OS=Homo sapiens OX=9606 GN=GPBP1;sp|Q86WP2|GPBP1_HUMAN Vasculin OS=Homo sapiens OX=9606 GN=GPBP1 PE=1 SV=1;sp|Q86WP2-2|GPBP1_HUMAN	1	4089	0	NaN	NaN	NaN	NaN	NaN	NaN	NaN	NaN	NaN	NaN	NaN	NaN	NaN	NaN	NaN	NaN	NaN
UID19334	S	3	___1	S(0.145)CS(0.659)DT(0.195)ALNAIVAK	0.659295	0.000102178	93.106	76.853	93.106	-0.33131	23102000	318	NaN	0.465992	NaN	0.443336	0.659295	0.434566	0.447541	NaN	NaN	Q86X02	318	Q86X02	Q86X02	Cerebellar degeneration-related protein 2-like	CDR2L	SSPAASPGHVVRKSCSDTALNAIVAKDPASR	sp|Q86X02|CDR2L_HUMAN Cerebellar degeneration-related protein 2-like OS=Homo sapiens OX=9606 GN=CDR2L PE=1 SV=2	1	4092	0	NaN	NaN	NaN	NaN	NaN	NaN	NaN	NaN	NaN	NaN	NaN	NaN	NaN	NaN	NaN	NaN	NaN
UID19347	S	3	___1	T(0.004)NS(0.896)GIS(0.041)S(0.041)AS(0.014)GGS(0.002)T(0.001)EPTTPDSERPAQALLR	0.896424	1.46e-54	164.39	140.72	114.03	0.14835	142240000	498	NaN	0	0	0.665827	0.896424	NaN	NaN	0	0	Q86X10-2;Q86X10-3;Q86X10;Q86X10-4	498;720;720;720	Q86X10-2	Q86X10-2	Ral GTPase-activating protein subunit beta	RALGAPB	MGGGENNLKSHSRTNSGISSASGGSTEPTTP	sp|Q86X10-2|RLGPB_HUMAN Isoform 2 of Ral GTPase-activating protein subunit beta OS=Homo sapiens OX=9606 GN=RALGAPB;sp|Q86X10-3|RLGPB_HUMAN Isoform 3 of Ral GTPase-activating protein subunit beta OS=Homo sapiens OX=9606 GN=RALGAPB;sp|Q86X10|RLGPB_HUMAN Ral	1	4093	0	NaN	NaN	NaN	NaN	NaN	NaN	NaN	NaN	NaN	NaN	NaN	NaN	NaN	NaN	NaN	NaN	NaN
UID19400	S	3	___1	T(0.001)APCIS(0.589)ES(0.411)PRK	0.588602	0.00781753	58.21	42.671	58.21	-0.15895	215480000	429	NaN	NaN	NaN	0	0.588602	0	NaN	NaN	NaN	Q86XJ1	429	Q86XJ1	Q86XJ1	GAS2-like protein 3	GAS2L3	KNTSSPALPRTAPCISESPRKCISSPNTPKA	sp|Q86XJ1|GA2L3_HUMAN GAS2-like protein 3 OS=Homo sapiens OX=9606 GN=GAS2L3 PE=1 SV=1	1	4103	0	NaN	NaN	NaN	NaN	NaN	NaN	NaN	NaN	NaN	NaN	NaN	NaN	NaN	NaN	NaN	NaN	NaN
UID19473	S	3	___1	AS(1)PVGDGNFR	1	0.000148686	116.6	97.786	47.039	0.022793	656320000	903	NaN	1	NaN	NaN	1	NaN	NaN	0	NaN	Q86YS7-3;Q86YS7;Q86YS7-2;Q86YS7-4;Q86YS7-5	903;852;894;905;906	Q86YS7-3	Q86YS7-3	C2 domain-containing protein 5	C2CD5	IRRGSIKTTMTVEKASPVGDGNFRNRSAPPC	sp|Q86YS7-3|C2CD5_HUMAN Isoform 3 of C2 domain-containing protein 5 OS=Homo sapiens OX=9606 GN=C2CD5;sp|Q86YS7|C2CD5_HUMAN C2 domain-containing protein 5 OS=Homo sapiens OX=9606 GN=C2CD5 PE=1 SV=1;sp|Q86YS7-2|C2CD5_HUMAN Isoform 2 of C2 domain-containing p	1	4125	0	NaN	NaN	NaN	NaN	NaN	NaN	NaN	NaN	NaN	NaN	NaN	NaN	NaN	NaN	NaN	NaN	NaN
UID19508	S	4	___1	HHPVFS(0.83)S(0.085)S(0.085)DPLEK	0.829715	0.000229657	84.566	67.627	84.566	0.26225	21112000	877	NaN	0.333333	0.333333	0.333333	0.829715	NaN	0.333333	0.333333	NaN	Q86YV5	877	Q86YV5	Q86YV5	Tyrosine-protein kinase SgK223	SGK223	FSYSLSPGNRHHPVFSSSDPLEKAFKGSGHW	sp|Q86YV5|PRAG1_HUMAN Inactive tyrosine-protein kinase PRAG1 OS=Homo sapiens OX=9606 GN=PRAG1 PE=1 SV=4	1	4126	0	NaN	NaN	NaN	NaN	NaN	NaN	NaN	NaN	NaN	NaN	NaN	NaN	NaN	NaN	NaN	NaN	NaN
UID19526	S	2	___1	GNS(0.016)GS(0.984)VLEGPGR	0.984347	0.00263463	75.02	52.965	75.02	0.3358	15612000	967	NaN	NaN	NaN	NaN	0.984347	NaN	NaN	NaN	NaN	Q86Z02;Q86Z02-4;Q86Z02-3;Q86Z02-2	967;573;593;967	Q86Z02	Q86Z02	Homeodomain-interacting protein kinase 1	HIPK1	PYSTDTLSALRGNSGSVLEGPGRVVADGTGT	sp|Q86Z02|HIPK1_HUMAN Homeodomain-interacting protein kinase 1 OS=Homo sapiens OX=9606 GN=HIPK1 PE=1 SV=1;sp|Q86Z02-4|HIPK1_HUMAN Isoform 4 of Homeodomain-interacting protein kinase 1 OS=Homo sapiens OX=9606 GN=HIPK1;sp|Q86Z02-3|HIPK1_HUMAN Isoform 3 of Ho	1	4127	0	NaN	NaN	NaN	NaN	NaN	NaN	NaN	NaN	NaN	NaN	NaN	NaN	NaN	NaN	NaN	NaN	NaN
UID19570	S	3	___1	LAQDEEPPPLPPRGS(1)PAAYR	0.999999	2.33e-08	82.342	56.517	82.342	-1.3614	30155000	217	NaN	0.999686	0.999999	0.998916	NaN	0.999642	NaN	NaN	NaN	Q8IUW3	217	Q8IUW3	Q8IUW3	Spermatogenesis-associated protein 2-like protein	SPATA2L	RLAQDEEPPPLPPRGSPAAYRAPLDLYRDLQ	sp|Q8IUW3|SPA2L_HUMAN Spermatogenesis-associated protein 2-like protein OS=Homo sapiens OX=9606 GN=SPATA2L PE=2 SV=1	1	4139	0	NaN	NaN	NaN	NaN	NaN	NaN	NaN	NaN	NaN	NaN	NaN	NaN	NaN	NaN	NaN	NaN	NaN
UID19614	S	3	___1	MPS(1)FGMLSPGK	0.999921	0.00594885	60.628	39.965	60.628	-0.3839	16681000	4472	NaN	0.999921	0	0	0.982977	0	NaN	0	NaN	Q8IVF2;Q8IVF2-3	4472;4372	Q8IVF2	Q8IVF2	Protein AHNAK2	AHNAK2	TAKDSKFKMPKFKMPSFGMLSPGKSIEVSVD	sp|Q8IVF2|AHNK2_HUMAN Protein AHNAK2 OS=Homo sapiens OX=9606 GN=AHNAK2 PE=1 SV=2;sp|Q8IVF2-3|AHNK2_HUMAN Isoform 3 of Protein AHNAK2 OS=Homo sapiens OX=9606 GN=AHNAK2	1	4151	0	NaN	NaN	NaN	NaN	NaN	NaN	NaN	NaN	NaN	NaN	NaN	NaN	NaN	NaN	NaN	NaN	NaN
UID19689	S	4	___1	S(0.55)S(0.449)GDESKKPLPSSSR	0.55048	0.000288426	85.855	69.759	85.855	0.33965	233570000	1097	NaN	NaN	NaN	NaN	0.55048	NaN	0	NaN	NaN	Q8IVL1-3;Q8IVL1-2;Q8IVL1;Q8IVL1-4;Q8IVL1-8;Q8IVL1-9;Q8IVL1-10;Q8IVL1-13;Q8IVL1-12;Q8IVL1-11;Q8IVL1-5	1097;1097;1120;1033;1040;1046;1049;1051;1056;1057;183	Q8IVL1-3	Q8IVL1-3	Neuron navigator 2	NAV2	PKASQVKRSPSDAGRSSGDESKKPLPSSSRT	sp|Q8IVL1-3|NAV2_HUMAN Isoform 3 of Neuron navigator 2 OS=Homo sapiens OX=9606 GN=NAV2;sp|Q8IVL1-2|NAV2_HUMAN Isoform 2 of Neuron navigator 2 OS=Homo sapiens OX=9606 GN=NAV2;sp|Q8IVL1|NAV2_HUMAN Neuron navigator 2 OS=Homo sapiens OX=9606 GN=NAV2 PE=1 SV=3;	1	4158	0	NaN	NaN	NaN	NaN	NaN	NaN	NaN	NaN	NaN	NaN	NaN	NaN	NaN	NaN	NaN	NaN	NaN
UID19699	S	3	___1	RALS(0.162)S(0.838)DS(0.997)ILS(0.003)PAPDAR	0.996941	3.68e-11	130.17	118.46	130.17	-0.30675	3182700000	397	0.956766	0.995526	0.91436	0.958492	0.852618	0.984381	0.956549	0.996941	0.990443	Q8IVT2	397	Q8IVT2	Q8IVT2	Mitotic interactor and substrate of PLK1	MISP	SEGPQPGLRRALSSDSILSPAPDARAADPAP	sp|Q8IVT2|MISP_HUMAN Mitotic interactor and substrate of PLK1 OS=Homo sapiens OX=9606 GN=MISP PE=1 SV=1	1;2	4162	0	NaN	NaN	NaN	NaN	NaN	NaN	NaN	NaN	NaN	NaN	NaN	NaN	NaN	NaN	NaN	NaN	NaN
UID19700	S	3	___1	ALS(0.781)S(0.219)DSILS(1)PAPDAR	1	6.35e-35	178.23	154.77	164.69	-0.29235	3643300000	400	0.999952	1	1	0.999999	0.999992	1	1	1	0.999998	Q8IVT2	400	Q8IVT2	Q8IVT2	Mitotic interactor and substrate of PLK1	MISP	PQPGLRRALSSDSILSPAPDARAADPAPEVR	sp|Q8IVT2|MISP_HUMAN Mitotic interactor and substrate of PLK1 OS=Homo sapiens OX=9606 GN=MISP PE=1 SV=1	1;2	4162	0	NaN	NaN	NaN	NaN	NaN	NaN	NaN	NaN	NaN	NaN	NaN	NaN	NaN	NaN	NaN	NaN	NaN
UID19751	S	3	___1	AGS(1)WPHCPGAQPPALEGPWSPR	1	2.86e-09	97.295	83.975	97.295	-0.084418	52768000	101	NaN	NaN	NaN	0	NaN	1	NaN	NaN	0	Q8IW93;Q8IW93-2	101;101	Q8IW93	Q8IW93	Rho guanine nucleotide exchange factor 19	ARHGEF19	DTEITSGGMRPSRAGSWPHCPGAQPPALEGP	sp|Q8IW93|ARHGJ_HUMAN Rho guanine nucleotide exchange factor 19 OS=Homo sapiens OX=9606 GN=ARHGEF19 PE=1 SV=1;sp|Q8IW93-2|ARHGJ_HUMAN Isoform 2 of Rho guanine nucleotide exchange factor 19 OS=Homo sapiens OX=9606 GN=ARHGEF19	1	4170	0	NaN	NaN	NaN	NaN	NaN	NaN	NaN	NaN	NaN	NaN	NaN	NaN	NaN	NaN	NaN	NaN	NaN
UID19794	S	4	___1	NGS(0.065)PS(0.37)LGRDS(0.522)PDT(0.042)MLAS(0.002)PQEEGEGPSSTTESSER	0.521743	7.21e-23	107.47	87.275	107.47	-0.34611	29847000	364	NaN	NaN	NaN	NaN	NaN	0.521743	NaN	NaN	NaN	Q8IWE5	364	Q8IWE5	Q8IWE5	Pleckstrin homology domain-containing family M member 2	PLEKHM2	GDGDSRNGSPSLGRDSPDTMLASPQEEGEGP	sp|Q8IWE5|PKHM2_HUMAN Pleckstrin homology domain-containing family M member 2 OS=Homo sapiens OX=9606 GN=PLEKHM2 PE=1 SV=2	1	4177	0	NaN	NaN	NaN	NaN	NaN	NaN	NaN	NaN	NaN	NaN	NaN	NaN	NaN	NaN	NaN	NaN	NaN
UID19810	S	3	___1	NTSGLPAEPES(0.019)VS(0.066)S(0.888)PPT(0.026)LHMK	0.887858	9.58e-05	61.511	44.432	52.824	-0.093919	36281000	2754	NaN	NaN	NaN	NaN	NaN	0.887858	0	NaN	0.459813	Q8IWI9-3;Q8IWI9	2754;2963	Q8IWI9-3	Q8IWI9-3	MAX gene-associated protein	MGA	GKNTSGLPAEPESVSSPPTLHMKTGLENSNS	sp|Q8IWI9-3|MGAP_HUMAN Isoform 2 of MAX gene-associated protein OS=Homo sapiens OX=9606 GN=MGA;sp|Q8IWI9|MGAP_HUMAN MAX gene-associated protein OS=Homo sapiens OX=9606 GN=MGA PE=1 SV=4	1	4179	0	NaN	NaN	NaN	NaN	NaN	NaN	NaN	NaN	NaN	NaN	NaN	NaN	NaN	NaN	NaN	NaN	NaN
UID19829	S	3	___1	NINS(1)LQEELLQLK	1	1.11e-16	145.62	112.7	64.454	-0.94274	58821000	236	NaN	1	NaN	1	1	1	NaN	1	1	Q8IWJ2	236	Q8IWJ2	Q8IWJ2	GRIP and coiled-coil domain-containing protein 2	GCC2	NIIEANSQHYQKNINSLQEELLQLKAIHQEE	sp|Q8IWJ2|GCC2_HUMAN GRIP and coiled-coil domain-containing protein 2 OS=Homo sapiens OX=9606 GN=GCC2 PE=1 SV=4	1	4180	0	NaN	NaN	NaN	NaN	NaN	NaN	NaN	NaN	NaN	NaN	NaN	NaN	NaN	NaN	NaN	NaN	NaN
UID19885	S	3	___1	IHQDS(0.001)ES(0.999)GDELSSSSTEQIR	0.998863	7.14e-116	235.76	214.53	235.76	0.65128	82350000	215	0	NaN	NaN	NaN	0.998863	NaN	NaN	NaN	NaN	Q8IWW6-4;Q8IWW6;Q8IWW6-3;Q8IWW6-2	215;215;215;215	Q8IWW6-4	Q8IWW6-4	Rho GTPase-activating protein 12	ARHGAP12	DSAGEGSERIHQDSESGDELSSSSTEQIRAT	sp|Q8IWW6-4|RHG12_HUMAN Isoform 4 of Rho GTPase-activating protein 12 OS=Homo sapiens OX=9606 GN=ARHGAP12;sp|Q8IWW6|RHG12_HUMAN Rho GTPase-activating protein 12 OS=Homo sapiens OX=9606 GN=ARHGAP12 PE=1 SV=1;sp|Q8IWW6-3|RHG12_HUMAN Isoform 3 of Rho GTPase-a	1	4192	0	NaN	NaN	NaN	NaN	NaN	NaN	NaN	NaN	NaN	NaN	NaN	NaN	NaN	NaN	NaN	NaN	NaN
UID19892	S	3	___1	VS(0.56)S(0.439)IDS(0.001)SEQK	0.560282	0.00121057	71.558	49.36	65.179	0.017015	45168000	611	NaN	NaN	NaN	NaN	0	0.560282	NaN	0.499824	NaN	Q8IWW6-4;Q8IWW6;Q8IWW6-3;Q8IWW6-2	611;616;564;586	Q8IWW6-4	Q8IWW6-4	Rho GTPase-activating protein 12	ARHGAP12	EKEQKDPKKLRSFKVSSIDSSEQKKTKKNLK	sp|Q8IWW6-4|RHG12_HUMAN Isoform 4 of Rho GTPase-activating protein 12 OS=Homo sapiens OX=9606 GN=ARHGAP12;sp|Q8IWW6|RHG12_HUMAN Rho GTPase-activating protein 12 OS=Homo sapiens OX=9606 GN=ARHGAP12 PE=1 SV=1;sp|Q8IWW6-3|RHG12_HUMAN Isoform 3 of Rho GTPase-a	1	4192	0	NaN	NaN	NaN	NaN	NaN	NaN	NaN	NaN	NaN	NaN	NaN	NaN	NaN	NaN	NaN	NaN	NaN
UID19948	S	2	___1	S(0.84)S(0.16)NPSISDDSYFR	0.840212	2.11e-16	146.84	121.13	146.84	-0.30254	16886000	92	NaN	NaN	NaN	NaN	NaN	0.840212	NaN	NaN	NaN	Q8IX01-4;Q8IX01-3;Q8IX01	92;92;92	Q8IX01-4	Q8IX01-4	SURP and G-patch domain-containing protein 2	SUGP2	REGLRSDVFPGPSFRSSNPSISDDSYFRKEC	sp|Q8IX01-4|SUGP2_HUMAN Isoform 4 of SURP and G-patch domain-containing protein 2 OS=Homo sapiens OX=9606 GN=SUGP2;sp|Q8IX01-3|SUGP2_HUMAN Isoform 3 of SURP and G-patch domain-containing protein 2 OS=Homo sapiens OX=9606 GN=SUGP2;sp|Q8IX01|SUGP2_HUMAN SURP	1	4198	0	NaN	NaN	NaN	NaN	NaN	NaN	NaN	NaN	NaN	NaN	NaN	NaN	NaN	NaN	NaN	NaN	NaN
UID20003	S	4	___1	RKS(1)FEQAASASFPEK	0.999999	3.27e-11	131.67	102.34	131.67	0.052832	32172000	526	NaN	NaN	NaN	NaN	NaN	0.999999	NaN	NaN	NaN	Q8IXJ9	526	Q8IXJ9	Q8IXJ9	Putative Polycomb group protein ASXL1	ASXL1	PQETVDQEPKDQKRKSFEQAASASFPEKKPR	sp|Q8IXJ9|ASXL1_HUMAN Polycomb group protein ASXL1 OS=Homo sapiens OX=9606 GN=ASXL1 PE=1 SV=4	1	4207	0	NaN	NaN	NaN	NaN	NaN	NaN	NaN	NaN	NaN	NaN	NaN	NaN	NaN	NaN	NaN	NaN	NaN
UID20019	S	4	___1	LGELTMQLHPVADS(0.5)S(0.5)PAGAQIK	0.5	6.23e-37	169.6	135.25	169.6	-0.51546	276050000	35	NaN	NaN	0.5	0.49942	0.5	0	NaN	0	NaN	Q8IXM2-2	35	Q8IXM2-2	Q8IXM2-2	Chromatin complexes subunit BAP18	BAP18	TKLGELTMQLHPVADSSPAGAQIKATVKRKV	sp|Q8IXM2-2|BAP18_HUMAN Isoform 2 of Chromatin complexes subunit BAP18 OS=Homo sapiens OX=9606 GN=BAP18	1	4211	0	NaN	NaN	NaN	NaN	NaN	NaN	NaN	NaN	NaN	NaN	NaN	NaN	NaN	NaN	NaN	NaN	NaN
UID20020	S	4	___1	LGELTMQLHPVADS(0.296)S(0.704)PAGAQIK	0.703953	6.23e-37	169.6	135.25	131.94	0.15166	338350000	36	NaN	NaN	0.5	0.49942	0.5	0.703953	NaN	0	NaN	Q8IXM2-2	36	Q8IXM2-2	Q8IXM2-2	Chromatin complexes subunit BAP18	BAP18	KLGELTMQLHPVADSSPAGAQIKATVKRKVY	sp|Q8IXM2-2|BAP18_HUMAN Isoform 2 of Chromatin complexes subunit BAP18 OS=Homo sapiens OX=9606 GN=BAP18	1	4211	0	NaN	NaN	NaN	NaN	NaN	NaN	NaN	NaN	NaN	NaN	NaN	NaN	NaN	NaN	NaN	NaN	NaN
UID20021	S	4	___1	QVYYHVLGLGEPLALKS(1)PR	1	1.19e-09	127.38	109.24	127.38	-0.093217	299730000	185	NaN	0	1	0.999982	0.999998	1	0	NaN	0.999946	Q8IXM6	185	Q8IXM6	Q8IXM6	Nurim	NRM	VYYHVLGLGEPLALKSPRALRLFSHLRHPVC	sp|Q8IXM6|NRM_HUMAN Nurim OS=Homo sapiens OX=9606 GN=NRM PE=1 SV=1	1	4212	0	NaN	NaN	NaN	NaN	NaN	NaN	NaN	NaN	NaN	NaN	NaN	NaN	NaN	NaN	NaN	NaN	NaN
UID20022	S	3	___1	KIDAGTMAEPS(0.989)AS(0.011)PSK	0.988911	3.06e-17	148.2	127.19	148.2	-0.21224	350950000	67	0	NaN	0.584448	0	0	0.988911	0.498959	0	0	Q8IXQ3	67	Q8IXQ3	Q8IXQ3	Uncharacterized protein C9orf40	C9orf40	QHRKRKIDAGTMAEPSASPSKRRDSGDNSAP	sp|Q8IXQ3|CI040_HUMAN Uncharacterized protein C9orf40 OS=Homo sapiens OX=9606 GN=C9orf40 PE=1 SV=1	1	4213	0	NaN	NaN	NaN	NaN	NaN	NaN	NaN	NaN	NaN	NaN	NaN	NaN	NaN	NaN	NaN	NaN	NaN
UID20072	S	3	___1	LFPSPGLPT(0.032)RT(0.097)S(0.871)PVR	0.871064	1.24e-05	114.56	91.593	114.56	-0.09441	163550000	314	0.390353	0	NaN	NaN	0.871064	NaN	0.446918	NaN	NaN	Q8IY17-5;Q8IY17-2;Q8IY17-3;Q8IY17	314;314;362;362	Q8IY17-5	Q8IY17-5	Neuropathy target esterase	PNPLA6	QPLRLFPSPGLPTRTSPVRGSKRMVSTSATD	sp|Q8IY17-5|PLPL6_HUMAN Isoform 5 of Neuropathy target esterase OS=Homo sapiens OX=9606 GN=PNPLA6;sp|Q8IY17-2|PLPL6_HUMAN Isoform 2 of Neuropathy target esterase OS=Homo sapiens OX=9606 GN=PNPLA6;sp|Q8IY17-3|PLPL6_HUMAN Isoform 3 of Neuropathy target ester	1	4221	0	NaN	NaN	NaN	NaN	NaN	NaN	NaN	NaN	NaN	NaN	NaN	NaN	NaN	NaN	NaN	NaN	NaN
UID20101	S	3	___1	TEAPQAS(1)PLAK	0.99999	0.000192757	93.51	57.999	86.641	0.37937	119630000	494	0.99994	0.999967	NaN	NaN	0.99999	NaN	NaN	NaN	NaN	Q8IY33;Q8IY33-5;Q8IY33-4;Q8IY33-2	494;282;494;452	Q8IY33	Q8IY33	MICAL-like protein 2	MICALL2	AAVPSSQPKTEAPQASPLAKPLQSSSPRVLG	sp|Q8IY33|MILK2_HUMAN MICAL-like protein 2 OS=Homo sapiens OX=9606 GN=MICALL2 PE=1 SV=1;sp|Q8IY33-5|MILK2_HUMAN Isoform 5 of MICAL-like protein 2 OS=Homo sapiens OX=9606 GN=MICALL2;sp|Q8IY33-4|MILK2_HUMAN Isoform 4 of MICAL-like protein 2 OS=Homo sapiens O	1	4225	0	NaN	NaN	NaN	NaN	NaN	NaN	NaN	NaN	NaN	NaN	NaN	NaN	NaN	NaN	NaN	NaN	NaN
UID20211	S	2	___1	QS(0.999)PS(0.005)PS(0.982)T(0.014)RPIR	0.982415	1.09e-10	151.3	126.8	132.21	-0.16623	95757000000	717	0.866294	0.874357	0.949854	0.778122	0.900512	0.918582	0.982415	0.882737	0.919093	Q8IYB3;Q8IYB3-2	717;715	Q8IYB3;Q8IYB3-2	Q8IYB3	Serine/arginine repetitive matrix protein 1	SRRM1	RGASSSPQRRQSPSPSTRPIRRVSRTPEPKK	sp|Q8IYB3|SRRM1_HUMAN Serine/arginine repetitive matrix protein 1 OS=Homo sapiens OX=9606 GN=SRRM1 PE=1 SV=2;sp|Q8IYB3-2|SRRM1_HUMAN Isoform 2 of Serine/arginine repetitive matrix protein 1 OS=Homo sapiens OX=9606 GN=SRRM1	1;2	4236;4237	0	NaN	NaN	NaN	NaN	NaN	NaN	NaN	NaN	NaN	NaN	NaN	NaN	NaN	NaN	NaN	NaN	NaN
UID20247	S	3	___1	KLS(1)VCVSEK	0.999995	0.00165866	82.543	53.779	82.543	0.29892	60262000	194	NaN	NaN	NaN	NaN	0.999995	0	NaN	NaN	NaN	Q8IYB7;Q8IYB7-4;Q8IYB7-5;Q8IYB7-3;Q8IYB7-2	194;194;194;194;194	Q8IYB7	Q8IYB7	DIS3-like exonuclease 2	DIS3L2	HGITQNVLVDGVKKLSVCVSEKGREDGDAPV	sp|Q8IYB7|DI3L2_HUMAN DIS3-like exonuclease 2 OS=Homo sapiens OX=9606 GN=DIS3L2 PE=1 SV=4;sp|Q8IYB7-4|DI3L2_HUMAN Isoform 4 of DIS3-like exonuclease 2 OS=Homo sapiens OX=9606 GN=DIS3L2;sp|Q8IYB7-5|DI3L2_HUMAN Isoform 5 of DIS3-like exonuclease 2 OS=Homo sa	1	4239	0	NaN	NaN	NaN	NaN	NaN	NaN	NaN	NaN	NaN	NaN	NaN	NaN	NaN	NaN	NaN	NaN	NaN
UID20318	S	3	___1	AYTEDRNS(1)LER	0.999998	0.00101301	79.337	61.177	79.337	0.4336	110540000	334	NaN	0.999542	NaN	NaN	0.999998	0.999793	NaN	0.999324	NaN	Q8IZ41	334	Q8IZ41	Q8IZ41	Ras and EF-hand domain-containing protein	RASEF	ERDLEIIRAYTEDRNSLERQIEILQTANRKL	sp|Q8IZ41|RASEF_HUMAN Ras and EF-hand domain-containing protein OS=Homo sapiens OX=9606 GN=RASEF PE=1 SV=1	1	4261	0	NaN	NaN	NaN	NaN	NaN	NaN	NaN	NaN	NaN	NaN	NaN	NaN	NaN	NaN	NaN	NaN	NaN
UID20410	S	3	___1	FSVQS(0.999)PT(0.001)K	0.999293	0.0013101	90.149	65.295	90.149	0.28561	44250000	309	NaN	NaN	0.957219	NaN	NaN	0.994157	NaN	NaN	0.999293	Q8IZU2-2;Q8IZU2	309;333	Q8IZU2-2	Q8IZU2-2	WD repeat-containing protein 17	WDR17	LHVLNSPPRKKFSVQSPTKNHYTSSTSEAVP	sp|Q8IZU2-2|WDR17_HUMAN Isoform 2 of WD repeat-containing protein 17 OS=Homo sapiens OX=9606 GN=WDR17;sp|Q8IZU2|WDR17_HUMAN WD repeat-containing protein 17 OS=Homo sapiens OX=9606 GN=WDR17 PE=2 SV=2	1	4286	0	NaN	NaN	NaN	NaN	NaN	NaN	NaN	NaN	NaN	NaN	NaN	NaN	NaN	NaN	NaN	NaN	NaN
UID20412	S	4	___1	EHASSCPPSITNSMVDIPIVLINGCPEPGS(0.537)S(0.463)PPQR	0.537237	3.65e-11	85.412	66.42	64.72	0.08583	49283000	385	NaN	NaN	NaN	NaN	0.5	NaN	NaN	NaN	0.537237	Q8IZW8	385	Q8IZW8	Q8IZW8	Tensin-4	TNS4	VDIPIVLINGCPEPGSSPPQRTPGHQNSVQP	sp|Q8IZW8|TENS4_HUMAN Tensin-4 OS=Homo sapiens OX=9606 GN=TNS4 PE=1 SV=3	1	4287	0	NaN	NaN	NaN	NaN	NaN	NaN	NaN	NaN	NaN	NaN	NaN	NaN	NaN	NaN	NaN	NaN	NaN
UID20428	S	3	___1	RS(0.409)S(0.589)GAT(0.003)GNSCSPLNATSGSGR	0.588887	4.23e-21	146.25	127.71	91.556	0.20364	48487000	811	NaN	NaN	NaN	NaN	0.588887	NaN	0.49985	0.498134	0	Q8N0Z3	811	Q8N0Z3	Q8N0Z3	Spindle and centriole-associated protein 1	SPICE1	CSTVSPVSGINTRRSSGATGNSCSPLNATSG	sp|Q8N0Z3|SPICE_HUMAN Spindle and centriole-associated protein 1 OS=Homo sapiens OX=9606 GN=SPICE1 PE=1 SV=1	1	4293	0	NaN	NaN	NaN	NaN	NaN	NaN	NaN	NaN	NaN	NaN	NaN	NaN	NaN	NaN	NaN	NaN	NaN
UID20438	S	2	___1	LLDESESAAS(0.985)S(0.015)R	0.985049	9.49e-12	147.73	126.78	147.73	-0.075261	517670000	345	0.858981	0.985049	0.943956	0.489186	0.499772	0.872249	0.900931	0.509746	0.804916	Q8N108-17;Q8N108;Q8N108-13;Q8N108-12;Q8N108-19;Q8N108-16;Q8N108-14;Q8N108-18;Q8N108-15	345;372;389;425;309;372;389;389;425	Q8N108-17	Q8N108-17	Mesoderm induction early response protein 1	MIER1	TDYMDRLLDESESAASSRAPSPPPTASNSSN	sp|Q8N108-17|MIER1_HUMAN Isoform 7 of Mesoderm induction early response protein 1 OS=Homo sapiens OX=9606 GN=MIER1;sp|Q8N108|MIER1_HUMAN Mesoderm induction early response protein 1 OS=Homo sapiens OX=9606 GN=MIER1 PE=1 SV=2;sp|Q8N108-13|MIER1_HUMAN Isoform	1;2;3	4294	0	NaN	NaN	NaN	NaN	NaN	NaN	NaN	NaN	NaN	NaN	NaN	NaN	NaN	NaN	NaN	NaN	NaN
UID20489	S	2	___1	QS(1)PGHQS(1)PLAS(1)PK	1	1.44e-19	157.88	132.92	75.911	-0.91693	6429600000	266	1	1	1	1	1	1	1	1	1	Q8N1G0;Q8N1G0-2	266;266	Q8N1G0	Q8N1G0	Zinc finger protein 687	ZNF687	SASPPPVAGVPFFKQSPGHQSPLASPKVPVC	sp|Q8N1G0|ZN687_HUMAN Zinc finger protein 687 OS=Homo sapiens OX=9606 GN=ZNF687 PE=1 SV=1;sp|Q8N1G0-2|ZN687_HUMAN Isoform 2 of Zinc finger protein 687 OS=Homo sapiens OX=9606 GN=ZNF687	1;2;3	4308	0	NaN	NaN	NaN	NaN	NaN	NaN	NaN	NaN	NaN	NaN	NaN	NaN	NaN	NaN	NaN	NaN	NaN
UID20513	S	3	___1	S(0.092)S(0.092)S(0.673)S(0.12)T(0.022)EQSLMMGLR	0.672878	9.38e-06	106.82	77.721	105.39	-0.18956	153870000	1118	NaN	NaN	NaN	NaN	0.672878	0	NaN	0.339551	0	Q8N1G0	1118	Q8N1G0	Q8N1G0	Zinc finger protein 687	ZNF687	GPGSGGHGPLRYRSSSSTEQSLMMGLRVEDG	sp|Q8N1G0|ZN687_HUMAN Zinc finger protein 687 OS=Homo sapiens OX=9606 GN=ZNF687 PE=1 SV=1	1	4308	0	NaN	NaN	NaN	NaN	NaN	NaN	NaN	NaN	NaN	NaN	NaN	NaN	NaN	NaN	NaN	NaN	NaN
UID20614	S	3	___1	GGLTGAT(0.316)S(0.684)PAWTR	0.68389	0.000638222	77.191	63.684	77.191	0.33642	22192000	440	NaN	0	NaN	0	NaN	0.68389	NaN	NaN	NaN	Q8N350-4	440	Q8N350-4	Q8N350-4	Protein Dos	DOS	SSGKAPPRGGLTGATSPAWTRGGKQGETG__	sp|Q8N350-4|CBARP_HUMAN Isoform 2 of Voltage-dependent calcium channel beta subunit-associated regulatory protein OS=Homo sapiens OX=9606 GN=CBARP	1	4331	0	NaN	NaN	NaN	NaN	NaN	NaN	NaN	NaN	NaN	NaN	NaN	NaN	NaN	NaN	NaN	NaN	NaN
UID20616	S	2	___1	LLGGT(0.022)RT(0.28)PINDAS(0.698)	0.697847	0.00251685	73.841	42.469	73.841	0.57664	20079000	371	0	0	NaN	0	0.697847	NaN	NaN	NaN	NaN	Q8N357	371	Q8N357	Q8N357	Solute carrier family 35 member F6	SLC35F6	QERLLGGTRTPINDAS_______________	sp|Q8N357|S35F6_HUMAN Solute carrier family 35 member F6 OS=Homo sapiens OX=9606 GN=SLC35F6 PE=1 SV=1	1	4332	0	NaN	NaN	NaN	NaN	NaN	NaN	NaN	NaN	NaN	NaN	NaN	NaN	NaN	NaN	NaN	NaN	NaN
UID20631	S	4	___1	IIS(0.253)HFS(0.747)QDDLT(0.001)ALVQMTEK	0.746627	1.61e-05	86.182	69.516	86.182	0.34331	5060900	142	NaN	NaN	NaN	NaN	0.746627	NaN	NaN	NaN	NaN	Q8N3C0;Q8N3C0-4	142;142	Q8N3C0	Q8N3C0	Activating signal cointegrator 1 complex subunit 3	ASCC3	ATAACNATNRIISHFSQDDLTALVQMTEKEH	sp|Q8N3C0|ASCC3_HUMAN Activating signal cointegrator 1 complex subunit 3 OS=Homo sapiens OX=9606 GN=ASCC3 PE=1 SV=3;sp|Q8N3C0-4|ASCC3_HUMAN Isoform 3 of Activating signal cointegrator 1 complex subunit 3 OS=Homo sapiens OX=9606 GN=ASCC3	1	4336	0	NaN	NaN	NaN	NaN	NaN	NaN	NaN	NaN	NaN	NaN	NaN	NaN	NaN	NaN	NaN	NaN	NaN
UID20676	S	3	___1	NSLLAGGDDDT(0.039)MS(0.97)VIS(0.947)GIS(0.036)S(0.008)R	0.970139	2.36e-10	103.85	87.366	71.974	0.028766	395590000	1058	0.625652	0.567091	NaN	0.684076	0.680588	0.582252	0	0.663361	0.970139	Q8N3U4;Q8N3U4-2	1058;1058	Q8N3U4	Q8N3U4	Cohesin subunit SA-2	STAG2	SYRNSLLAGGDDDTMSVISGISSRGSTVRSK	sp|Q8N3U4|STAG2_HUMAN Cohesin subunit SA-2 OS=Homo sapiens OX=9606 GN=STAG2 PE=1 SV=3;sp|Q8N3U4-2|STAG2_HUMAN Isoform 2 of Cohesin subunit SA-2 OS=Homo sapiens OX=9606 GN=STAG2	1;2	4342	0	NaN	NaN	NaN	NaN	NaN	NaN	NaN	NaN	NaN	NaN	NaN	NaN	NaN	NaN	NaN	NaN	NaN
UID20723	S	2	___1	DKEIS(0.205)PS(0.786)VT(0.009)K	0.786144	0.000103104	119.39	80.752	68.735	0.10087	60613000	101	NaN	NaN	0.786144	0	NaN	0.5159	0.659459	NaN	NaN	Q8N488	101	Q8N488	Q8N488	RING1 and YY1-binding protein	RYBP	KQDKEKPEKDKEISPSVTKKNTNKKTKPKSD	sp|Q8N488|RYBP_HUMAN RING1 and YY1-binding protein OS=Homo sapiens OX=9606 GN=RYBP PE=1 SV=2	1	4350	0	NaN	NaN	NaN	NaN	NaN	NaN	NaN	NaN	NaN	NaN	NaN	NaN	NaN	NaN	NaN	NaN	NaN
UID20744	S	3	___1	GQS(0.923)PPS(0.075)KDGS(0.002)GDYQSR	0.923297	0.000791385	64.83	48.078	52.541	0.47078	61438000	927	0.813662	NaN	NaN	NaN	0.923297	NaN	NaN	0.666263	0.596807	Q8N4C8;Q8N4C8-4	927;907	Q8N4C8	Q8N4C8	Misshapen-like kinase 1	MINK1	VVQPSHSPTENSKGQSPPSKDGSGDYQSRGL	sp|Q8N4C8|MINK1_HUMAN Misshapen-like kinase 1 OS=Homo sapiens OX=9606 GN=MINK1 PE=1 SV=2;sp|Q8N4C8-4|MINK1_HUMAN Isoform 4 of Misshapen-like kinase 1 OS=Homo sapiens OX=9606 GN=MINK1	1	4355	0	NaN	NaN	NaN	NaN	NaN	NaN	NaN	NaN	NaN	NaN	NaN	NaN	NaN	NaN	NaN	NaN	NaN
UID20769	S	2	___1	S(1)PLNSCK	0.99994	2.84e-07	80.755	31.337	80.755	-0.079299	371840000	128	NaN	0	NaN	0	0.999927	0	0.974914	NaN	0.99994	Q8N4S9;Q8N4S9-3;Q8N4S9-2	128;128;128	Q8N4S9	Q8N4S9	MARVEL domain-containing protein 2	MARVELD2	VECSPPASPARPNHRSPLNSCKDPYGGSEGT	sp|Q8N4S9|MALD2_HUMAN MARVEL domain-containing protein 2 OS=Homo sapiens OX=9606 GN=MARVELD2 PE=1 SV=2;sp|Q8N4S9-3|MALD2_HUMAN Isoform 3 of MARVEL domain-containing protein 2 OS=Homo sapiens OX=9606 GN=MARVELD2;sp|Q8N4S9-2|MALD2_HUMAN Isoform 2 of MARVEL d	1	4359	0	NaN	NaN	NaN	NaN	NaN	NaN	NaN	NaN	NaN	NaN	NaN	NaN	NaN	NaN	NaN	NaN	NaN
UID20811	S	2	___1	SSSS(0.017)S(0.878)PT(0.091)S(0.013)PGSFR	0.878371	6.39e-05	106.32	81.988	106.32	0.89243	6726200	341	NaN	NaN	NaN	NaN	NaN	0.878371	NaN	NaN	NaN	Q8N568-2;Q8N568;Q8N568-3	341;341;358	Q8N568-2	Q8N568-2	Serine/threonine-protein kinase DCLK2	DCLK2	SSQLSTPKSTKSSSSSPTSPGSFRGLKISAH	sp|Q8N568-2|DCLK2_HUMAN Isoform 2 of Serine/threonine-protein kinase DCLK2 OS=Homo sapiens OX=9606 GN=DCLK2;sp|Q8N568|DCLK2_HUMAN Serine/threonine-protein kinase DCLK2 OS=Homo sapiens OX=9606 GN=DCLK2 PE=1 SV=4;sp|Q8N568-3|DCLK2_HUMAN Isoform 3 of Serine/t	1	4367	0	NaN	NaN	NaN	NaN	NaN	NaN	NaN	NaN	NaN	NaN	NaN	NaN	NaN	NaN	NaN	NaN	NaN
UID20833	S	3	___1	AQS(0.143)S(0.857)PQLDIQVLHDLR	0.857332	0.000148274	83.849	74.685	83.849	0.19666	18493000	5	NaN	NaN	NaN	NaN	NaN	0.667273	NaN	NaN	0.857332	Q8N5C8-2;Q8N5C8	5;5	Q8N5C8-2	Q8N5C8-2	TGF-beta-activated kinase 1 and MAP3K7-binding protein 3	TAB3	___________MAQSSPQLDIQVLHDLRQRF	sp|Q8N5C8-2|TAB3_HUMAN Isoform 2 of TGF-beta-activated kinase 1 and MAP3K7-binding protein 3 OS=Homo sapiens OX=9606 GN=TAB3;sp|Q8N5C8|TAB3_HUMAN TGF-beta-activated kinase 1 and MAP3K7-binding protein 3 OS=Homo sapiens OX=9606 GN=TAB3 PE=1 SV=3	1	4373	0	NaN	NaN	NaN	NaN	NaN	NaN	NaN	NaN	NaN	NaN	NaN	NaN	NaN	NaN	NaN	NaN	NaN
UID20835	S	4	___1	QLICLVQEPHS(0.999)APAVVAAT(0.001)PNYNPFFMNEQNR	0.998916	4.16e-51	148.45	134.4	148.45	-0.2232	78249000	126	0	NaN	NaN	NaN	0.998916	NaN	NaN	NaN	NaN	Q8N5C8-2;Q8N5C8	126;126	Q8N5C8-2	Q8N5C8-2	TGF-beta-activated kinase 1 and MAP3K7-binding protein 3	TAB3	HAAGKQLICLVQEPHSAPAVVAATPNYNPFF	sp|Q8N5C8-2|TAB3_HUMAN Isoform 2 of TGF-beta-activated kinase 1 and MAP3K7-binding protein 3 OS=Homo sapiens OX=9606 GN=TAB3;sp|Q8N5C8|TAB3_HUMAN TGF-beta-activated kinase 1 and MAP3K7-binding protein 3 OS=Homo sapiens OX=9606 GN=TAB3 PE=1 SV=3	1	4373	0	NaN	NaN	NaN	NaN	NaN	NaN	NaN	NaN	NaN	NaN	NaN	NaN	NaN	NaN	NaN	NaN	NaN
UID20897	S	4	___1	QTLELCTFEEGS(1)QMDNMLVQTNKPYK	0.999658	1.36e-32	147.54	136.43	147.54	-0.03386	155640000	435	0.996117	0.999658	0.562917	0.993949	NaN	0.869543	NaN	NaN	NaN	Q8N680	435	Q8N680	Q8N680	Zinc finger and BTB domain-containing protein 2	ZBTB2	MVDKQTLELCTFEEGSQMDNMLVQTNKPYKC	sp|Q8N680|ZBTB2_HUMAN Zinc finger and BTB domain-containing protein 2 OS=Homo sapiens OX=9606 GN=ZBTB2 PE=1 SV=1	1	4389	0	NaN	NaN	NaN	NaN	NaN	NaN	NaN	NaN	NaN	NaN	NaN	NaN	NaN	NaN	NaN	NaN	NaN
UID20918	S	3	___1	SQLDLFDDVGT(0.031)FAS(0.969)GPPK	0.969315	5.53e-05	91.729	69.196	91.729	-0.039564	14308000	353	NaN	NaN	NaN	0	0.969315	0	NaN	0	NaN	Q8N6H7;Q8N6H7-2;Q8N6H7-3	353;246;84	Q8N6H7	Q8N6H7	ADP-ribosylation factor GTPase-activating protein 2	ARFGAP2	SRSQLDLFDDVGTFASGPPKYKDNPFSLGES	sp|Q8N6H7|ARFG2_HUMAN ADP-ribosylation factor GTPase-activating protein 2 OS=Homo sapiens OX=9606 GN=ARFGAP2 PE=1 SV=1;sp|Q8N6H7-2|ARFG2_HUMAN Isoform 2 of ADP-ribosylation factor GTPase-activating protein 2 OS=Homo sapiens OX=9606 GN=ARFGAP2;sp|Q8N6H7-3|A	1	4393	0	NaN	NaN	NaN	NaN	NaN	NaN	NaN	NaN	NaN	NaN	NaN	NaN	NaN	NaN	NaN	NaN	NaN
UID20934	S	3	___1	S(0.42)PS(0.579)S(0.001)DSWTCADTSTER	0.578874	9.27e-12	138.05	120.97	138.05	-0.092754	51580000	300	0	NaN	0.408823	0	0.489905	0.578874	0	NaN	0	Q8N6T3-5;Q8N6T3;Q8N6T3-2;Q8N6T3-4	300;345;353;232	Q8N6T3-5	Q8N6T3-5	ADP-ribosylation factor GTPase-activating protein 1	ARFGAP1	ETFGSAEPTKTRKSPSSDSWTCADTSTERRS	sp|Q8N6T3-5|ARFG1_HUMAN Isoform 5 of ADP-ribosylation factor GTPase-activating protein 1 OS=Homo sapiens OX=9606 GN=ARFGAP1;sp|Q8N6T3|ARFG1_HUMAN ADP-ribosylation factor GTPase-activating protein 1 OS=Homo sapiens OX=9606 GN=ARFGAP1 PE=1 SV=2;sp|Q8N6T3-2|A	1	4401	0	NaN	NaN	NaN	NaN	NaN	NaN	NaN	NaN	NaN	NaN	NaN	NaN	NaN	NaN	NaN	NaN	NaN
UID20954	S	2	___1	S(0.897)FS(0.103)ADNFIGIQR	0.896998	1.06e-16	165.64	137.96	165.64	0.15524	556780000	272	NaN	NaN	0.896998	NaN	0.621068	0.579704	NaN	0.509321	0.5	Q8N7R7-3;Q8N7R7;Q8N7R7-2	272;342;291	Q8N7R7-3	Q8N7R7-3	Cyclin-Y-like protein 1	CCNYL1	RLCEDKDLCRAAMRRSFSADNFIGIQRSKAI	sp|Q8N7R7-3|CCYL1_HUMAN Isoform 3 of Cyclin-Y-like protein 1 OS=Homo sapiens OX=9606 GN=CCNYL1;sp|Q8N7R7|CCYL1_HUMAN Cyclin-Y-like protein 1 OS=Homo sapiens OX=9606 GN=CCNYL1 PE=1 SV=2;sp|Q8N7R7-2|CCYL1_HUMAN Isoform 2 of Cyclin-Y-like protein 1 OS=Homo sa	1	4407	0	NaN	NaN	NaN	NaN	NaN	NaN	NaN	NaN	NaN	NaN	NaN	NaN	NaN	NaN	NaN	NaN	NaN
UID20995	S	3	___1	HNS(0.987)WDT(0.013)VNTVLPEDPEVADLFSR	0.987299	5.76e-07	86.869	69.791	86.869	-0.013793	107360000	67	NaN	NaN	0	NaN	0.987299	0	0.980775	0	NaN	Q8N961	67	Q8N961	Q8N961	Ankyrin repeat and BTB/POZ domain-containing protein 2	ABTB2	AAWWCYSGSMNSRHNSWDTVNTVLPEDPEVA	sp|Q8N961|ABTB2_HUMAN Ankyrin repeat and BTB/POZ domain-containing protein 2 OS=Homo sapiens OX=9606 GN=ABTB2 PE=2 SV=2	1	4422	0	NaN	NaN	NaN	NaN	NaN	NaN	NaN	NaN	NaN	NaN	NaN	NaN	NaN	NaN	NaN	NaN	NaN
UID21026	S	4	___1	S(1)PFAAAVGQEKPVFEPGDK	1	9.13e-70	197.37	177.99	161.04	0.1797	59552000	480	NaN	NaN	NaN	NaN	1	1	NaN	NaN	NaN	Q8N9T8	480	Q8N9T8	Q8N9T8	Protein KRI1 homolog	KRI1	KKKREAPLTGKKKRKSPFAAAVGQEKPVFEP	sp|Q8N9T8|KRI1_HUMAN Protein KRI1 homolog OS=Homo sapiens OX=9606 GN=KRI1 PE=1 SV=3	1	4431	0	NaN	NaN	NaN	NaN	NaN	NaN	NaN	NaN	NaN	NaN	NaN	NaN	NaN	NaN	NaN	NaN	NaN
UID21031	S	2	___1	LYGS(1)VCDLR	1	0.000685611	119.53	92.742	112.36	-0.32062	826840000	156	0.999998	0.999843	0	1	1	1	0.999998	1	0.999991	Q8N9U0-2;Q8N9U0	156;156	Q8N9U0-2	Q8N9U0-2	Tandem C2 domains nuclear protein	TC2N	SRRFPPRSEVKRLYGSVCDLRTNKLPGSPGL	sp|Q8N9U0-2|TAC2N_HUMAN Isoform 2 of Tandem C2 domains nuclear protein OS=Homo sapiens OX=9606 GN=TC2N;sp|Q8N9U0|TAC2N_HUMAN Tandem C2 domains nuclear protein OS=Homo sapiens OX=9606 GN=TC2N PE=1 SV=2	1	4432	0	NaN	NaN	NaN	NaN	NaN	NaN	NaN	NaN	NaN	NaN	NaN	NaN	NaN	NaN	NaN	NaN	NaN
UID21052	S	3	___1	APLPS(1)PLHTPGNR	0.999993	1.41e-06	101.01	79.451	101.01	-0.23159	44978000	233	0.999917	NaN	0.999993	NaN	0.999453	0.999794	0	NaN	NaN	Q8NAV2-2;Q8NAV2	233;233	Q8NAV2-2	Q8NAV2-2	Uncharacterized protein C8orf58	C8orf58	PGDPGEEESTRAPLPSPLHTPGNRGQGPWEL	sp|Q8NAV2-2|CH058_HUMAN Isoform 2 of Uncharacterized protein C8orf58 OS=Homo sapiens OX=9606 GN=C8orf58;sp|Q8NAV2|CH058_HUMAN Uncharacterized protein C8orf58 OS=Homo sapiens OX=9606 GN=C8orf58 PE=2 SV=2	1	4442	0	NaN	NaN	NaN	NaN	NaN	NaN	NaN	NaN	NaN	NaN	NaN	NaN	NaN	NaN	NaN	NaN	NaN
UID21059	S	3	___1	DS(0.955)PS(0.045)AVFEQDLENK	0.954908	7.17e-21	155.88	133.35	155.88	-1.6155	207940000	895	NaN	0.94206	NaN	0	0.780385	0.954908	NaN	0.795844	NaN	Q8NB14-2;Q8NB14	895;895	Q8NB14-2	Q8NB14-2	Ubiquitin carboxyl-terminal hydrolase 38	USP38	ALALASSQSHLLGRDSPSAVFEQDLENKEMS	sp|Q8NB14-2|UBP38_HUMAN Isoform 2 of Ubiquitin carboxyl-terminal hydrolase 38 OS=Homo sapiens OX=9606 GN=USP38;sp|Q8NB14|UBP38_HUMAN Ubiquitin carboxyl-terminal hydrolase 38 OS=Homo sapiens OX=9606 GN=USP38 PE=1 SV=2	1	4444	0	NaN	NaN	NaN	NaN	NaN	NaN	NaN	NaN	NaN	NaN	NaN	NaN	NaN	NaN	NaN	NaN	NaN
UID21066	S	3	___1	KLS(1)DVWK	1	0.00933132	74.944	23.677	74.944	0.32416	66609000	106	NaN	0	1	1	NaN	1	1	NaN	1	Q8NB16;Q8NB16-2	106;106	Q8NB16	Q8NB16	Mixed lineage kinase domain-like protein	MLKL	ASQDKILFKDVNRKLSDVWKELSLLLQVEQR	sp|Q8NB16|MLKL_HUMAN Mixed lineage kinase domain-like protein OS=Homo sapiens OX=9606 GN=MLKL PE=1 SV=1;sp|Q8NB16-2|MLKL_HUMAN Isoform 2 of Mixed lineage kinase domain-like protein OS=Homo sapiens OX=9606 GN=MLKL	1	4446	0	NaN	NaN	NaN	NaN	NaN	NaN	NaN	NaN	NaN	NaN	NaN	NaN	NaN	NaN	NaN	NaN	NaN
UID21096	S	4	___1	NVS(1)NLKPVPLIGPK	1	8.18e-08	119.38	93.229	119.38	0.025916	85842000	217	NaN	NaN	NaN	NaN	1	NaN	NaN	NaN	NaN	Q8NBX0	217	Q8NBX0	Q8NBX0	Saccharopine dehydrogenase-like oxidoreductase	SCCPDH	YGFGDQSNLRKLRNVSNLKPVPLIGPKLKRR	sp|Q8NBX0|SCPDL_HUMAN Saccharopine dehydrogenase-like oxidoreductase OS=Homo sapiens OX=9606 GN=SCCPDH PE=1 SV=1	1	4464	0	NaN	NaN	NaN	NaN	NaN	NaN	NaN	NaN	NaN	NaN	NaN	NaN	NaN	NaN	NaN	NaN	NaN
UID21167	S	3	___1	AVAPS(0.454)PS(0.546)GAIGGLLEQFAR	0.545804	0.00762416	50.827	35.256	50.827	1.2616	165610000	626	NaN	0	NaN	NaN	0.545804	0	NaN	NaN	NaN	Q8NCE2;Q8NCE2-2;Q8NCE2-3	626;574;514	Q8NCE2	Q8NCE2	Myotubularin-related protein 14	MTMR14	AYSSTVGLRAVAPSPSGAIGGLLEQFARGVG	sp|Q8NCE2|MTMRE_HUMAN Myotubularin-related protein 14 OS=Homo sapiens OX=9606 GN=MTMR14 PE=1 SV=2;sp|Q8NCE2-2|MTMRE_HUMAN Isoform 2 of Myotubularin-related protein 14 OS=Homo sapiens OX=9606 GN=MTMR14;sp|Q8NCE2-3|MTMRE_HUMAN Isoform 3 of Myotubularin-relat	1	4480	0	NaN	NaN	NaN	NaN	NaN	NaN	NaN	NaN	NaN	NaN	NaN	NaN	NaN	NaN	NaN	NaN	NaN
UID21202	S	3	___1	CVS(1)APDLTIEK	0.999996	0.000366635	86.405	49.558	86.405	-0.0033525	11790000	339	NaN	NaN	NaN	NaN	NaN	0.999996	NaN	NaN	NaN	Q8NCN4	339	Q8NCN4	Q8NCN4	E3 ubiquitin-protein ligase RNF169	RNF169	PIIGVLLSTQNNRCVSAPDLTIEKRLPFSSL	sp|Q8NCN4|RN169_HUMAN E3 ubiquitin-protein ligase RNF169 OS=Homo sapiens OX=9606 GN=RNF169 PE=1 SV=2	1	4485	0	NaN	NaN	NaN	NaN	NaN	NaN	NaN	NaN	NaN	NaN	NaN	NaN	NaN	NaN	NaN	NaN	NaN
UID21260	S	2	___1	S(0.38)PVS(0.619)T(0.001)RPLPSASQK	0.618512	6.47e-27	172.85	146.74	172.85	-0.41769	639300000	219	NaN	NaN	0.386286	0.425858	0.618512	0	0	0	0.483889	Q8ND56;Q8ND56-2;Q8ND56-3	219;219;178	Q8ND56	Q8ND56	Protein LSM14 homolog A	LSM14A	AHLPAPAAVGRRSPVSTRPLPSASQKAGENQ	sp|Q8ND56|LS14A_HUMAN Protein LSM14 homolog A OS=Homo sapiens OX=9606 GN=LSM14A PE=1 SV=3;sp|Q8ND56-2|LS14A_HUMAN Isoform 2 of Protein LSM14 homolog A OS=Homo sapiens OX=9606 GN=LSM14A;sp|Q8ND56-3|LS14A_HUMAN Isoform 3 of Protein LSM14 homolog A OS=Homo sa	1	4497	0	NaN	NaN	NaN	NaN	NaN	NaN	NaN	NaN	NaN	NaN	NaN	NaN	NaN	NaN	NaN	NaN	NaN
UID21314	S	3	___1	ASGDPGAS(0.777)GMS(0.223)PR	0.776748	0.00225424	65.943	49.719	65.943	0.052633	33281000	106	NaN	0	0.776748	0	0	0.561158	NaN	0	0	Q8NDT2	106	Q8NDT2	Q8NDT2	Putative RNA-binding protein 15B	RBM15B	GGGGRGGKASGDPGASGMSPRASPLPPPPPP	sp|Q8NDT2|RB15B_HUMAN Putative RNA-binding protein 15B OS=Homo sapiens OX=9606 GN=RBM15B PE=1 SV=3	1	4508	0	NaN	NaN	NaN	NaN	NaN	NaN	NaN	NaN	NaN	NaN	NaN	NaN	NaN	NaN	NaN	NaN	NaN
UID21342	S	3	___1	S(0.897)VS(0.103)GWNELGK	0.897289	5.84e-05	116.71	97.101	110.8	-0.26748	19681000	630	NaN	0.89544	NaN	NaN	NaN	0.897289	NaN	NaN	0	Q8NDV7-2;Q8NDV7-6;Q8NDV7-5;Q8NDV7	630;883;851;883	Q8NDV7-2	Q8NDV7-2	Trinucleotide repeat-containing gene 6A protein	TNRC6A	EANKKSSSGGSDSDRSVSGWNELGKTSSFTW	sp|Q8NDV7-2|TNR6A_HUMAN Isoform 2 of Trinucleotide repeat-containing gene 6A protein OS=Homo sapiens OX=9606 GN=TNRC6A;sp|Q8NDV7-6|TNR6A_HUMAN Isoform 6 of Trinucleotide repeat-containing gene 6A protein OS=Homo sapiens OX=9606 GN=TNRC6A;sp|Q8NDV7-5|TNR6A_	1	4510	0	NaN	NaN	NaN	NaN	NaN	NaN	NaN	NaN	NaN	NaN	NaN	NaN	NaN	NaN	NaN	NaN	NaN
UID21433	S	3	___1	ESGAPS(0.999)PIT(0.001)FTSLR	0.999049	0.00169806	68.41	53.438	68.41	0.035075	26972000	1726	NaN	NaN	NaN	NaN	NaN	0.999049	NaN	NaN	NaN	Q8NEV8-2;Q8NEV8	1726;1733	Q8NEV8-2	Q8NEV8-2	Exophilin-5	EXPH5	DVTAAQNLVRESGAPSPITFTSLREAEFSDN	sp|Q8NEV8-2|EXPH5_HUMAN Isoform 2 of Exophilin-5 OS=Homo sapiens OX=9606 GN=EXPH5;sp|Q8NEV8|EXPH5_HUMAN Exophilin-5 OS=Homo sapiens OX=9606 GN=EXPH5 PE=1 SV=3	1	4530	0	NaN	NaN	NaN	NaN	NaN	NaN	NaN	NaN	NaN	NaN	NaN	NaN	NaN	NaN	NaN	NaN	NaN
UID21446	S	3	___1	TSCDSLDLSSAALPDS(0.621)S(0.373)PS(0.006)K	0.621226	1.37e-33	161.68	133.18	161.68	0.13275	79119000	880	NaN	NaN	NaN	NaN	NaN	0.621226	NaN	NaN	NaN	Q8NEV8-2;Q8NEV8	880;887	Q8NEV8-2	Q8NEV8-2	Exophilin-5	EXPH5	TSCDSLDLSSAALPDSSPSKNSSLDAPVVPS	sp|Q8NEV8-2|EXPH5_HUMAN Isoform 2 of Exophilin-5 OS=Homo sapiens OX=9606 GN=EXPH5;sp|Q8NEV8|EXPH5_HUMAN Exophilin-5 OS=Homo sapiens OX=9606 GN=EXPH5 PE=1 SV=3	1	4530	0	NaN	NaN	NaN	NaN	NaN	NaN	NaN	NaN	NaN	NaN	NaN	NaN	NaN	NaN	NaN	NaN	NaN
UID21464	S	2	___1	SIGS(0.045)PES(0.767)T(0.188)PK	0.766943	2.35e-06	142.08	98.777	142.08	0.11781	521990000	763	NaN	0.486011	NaN	NaN	NaN	0.766943	NaN	NaN	NaN	Q8NEY1-2;Q8NEY1-3;Q8NEY1;Q8NEY1-7;Q8NEY1-4;Q8NEY1-6;Q8NEY1-5	763;763;763;763;763;763;372	Q8NEY1-2	Q8NEY1-2	Neuron navigator 1	NAV1	LDSDNISLKSIGSPESTPKNQASHPTATKLA	sp|Q8NEY1-2|NAV1_HUMAN Isoform 2 of Neuron navigator 1 OS=Homo sapiens OX=9606 GN=NAV1;sp|Q8NEY1-3|NAV1_HUMAN Isoform 3 of Neuron navigator 1 OS=Homo sapiens OX=9606 GN=NAV1;sp|Q8NEY1|NAV1_HUMAN Neuron navigator 1 OS=Homo sapiens OX=9606 GN=NAV1 PE=1 SV=2;	1	4531	0	NaN	NaN	NaN	NaN	NaN	NaN	NaN	NaN	NaN	NaN	NaN	NaN	NaN	NaN	NaN	NaN	NaN
UID21504	S	3	___1	PLQMNET(0.042)T(0.063)ANRPS(0.895)PVR	0.8948	0.0122862	54.658	37.256	41.711	0.34658	88223000	1947	NaN	NaN	0.8948	NaN	0.627982	0	NaN	NaN	0	Q8NEZ4-3;Q8NEZ4;Q8NEZ4-2	1947;1947;1008	Q8NEZ4-3	Q8NEZ4-3	Histone-lysine N-methyltransferase 2C	KMT2C	VSRPLQMNETTANRPSPVRDLCSSSTTNNDP	sp|Q8NEZ4-3|KMT2C_HUMAN Isoform 3 of Histone-lysine N-methyltransferase 2C OS=Homo sapiens OX=9606 GN=KMT2C;sp|Q8NEZ4|KMT2C_HUMAN Histone-lysine N-methyltransferase 2C OS=Homo sapiens OX=9606 GN=KMT2C PE=1 SV=3;sp|Q8NEZ4-2|KMT2C_HUMAN Isoform 2 of Histone-	1	4534	0	NaN	NaN	NaN	NaN	NaN	NaN	NaN	NaN	NaN	NaN	NaN	NaN	NaN	NaN	NaN	NaN	NaN
UID21521	S	4	___1	S(0.007)IPGY(0.008)PS(0.475)S(0.509)PLPGNPT(0.001)PPMTPSSSVPYMSPNQEVK	0.508568	3.77e-11	84.369	68.729	84.369	0.021151	27127000	310	NaN	NaN	NaN	0	NaN	0.508568	NaN	NaN	NaN	Q8NF64-3;Q8NF64-2;Q8NF64	310;342;368	Q8NF64-3	Q8NF64-3	Zinc finger MIZ domain-containing protein 2	ZMIZ2	GLHYKPTRSIPGYPSSPLPGNPTPPMTPSSS	sp|Q8NF64-3|ZMIZ2_HUMAN Isoform 3 of Zinc finger MIZ domain-containing protein 2 OS=Homo sapiens OX=9606 GN=ZMIZ2;sp|Q8NF64-2|ZMIZ2_HUMAN Isoform 2 of Zinc finger MIZ domain-containing protein 2 OS=Homo sapiens OX=9606 GN=ZMIZ2;sp|Q8NF64|ZMIZ2_HUMAN Zinc f	1	4536	0	NaN	NaN	NaN	NaN	NaN	NaN	NaN	NaN	NaN	NaN	NaN	NaN	NaN	NaN	NaN	NaN	NaN
UID21525	S	3	___1	S(0.555)KT(0.377)PT(0.068)GPELDTSYK	0.554878	3.67e-17	140.95	119.4	98.165	0.066775	98553000	8310	NaN	0	NaN	NaN	0.497022	0.554878	0	NaN	NaN	Q8NF91-4;Q8NF91;Q8NF91-9;Q8NF91-3;Q8NF91-11;Q8NF91-8;Q8NF91-2	8310;8358;538;543;700;2773;2882	Q8NF91-4	Q8NF91-4	Nesprin-1	SYNE1	DDSRFQIQQTENIIRSKTPTGPELDTSYKGY	sp|Q8NF91-4|SYNE1_HUMAN Isoform 4 of Nesprin-1 OS=Homo sapiens OX=9606 GN=SYNE1;sp|Q8NF91|SYNE1_HUMAN Nesprin-1 OS=Homo sapiens OX=9606 GN=SYNE1 PE=1 SV=4;sp|Q8NF91-9|SYNE1_HUMAN Isoform 9 of Nesprin-1 OS=Homo sapiens OX=9606 GN=SYNE1;sp|Q8NF91-3|SYNE1_HUM	1	4537	0	NaN	NaN	NaN	NaN	NaN	NaN	NaN	NaN	NaN	NaN	NaN	NaN	NaN	NaN	NaN	NaN	NaN
UID21536	S	3	___1	LS(0.52)S(0.266)S(0.214)KENLDASK	0.519825	1.98e-08	126.88	91.969	126.88	0.17622	161030000	1421	0	NaN	NaN	0	0.519825	0	NaN	NaN	NaN	Q8NFA0	1421	Q8NFA0	Q8NFA0	Ubiquitin carboxyl-terminal hydrolase 32	USP32	KGRLRLPQIGSKNKLSSSKENLDASKENGAG	sp|Q8NFA0|UBP32_HUMAN Ubiquitin carboxyl-terminal hydrolase 32 OS=Homo sapiens OX=9606 GN=USP32 PE=1 SV=1	1	4539	0	NaN	NaN	NaN	NaN	NaN	NaN	NaN	NaN	NaN	NaN	NaN	NaN	NaN	NaN	NaN	NaN	NaN
UID21602	S	3	___1	S(0.182)IS(0.81)GPS(0.008)VGVMEMR	0.810067	0.0102553	54.768	43.328	47.916	0.067586	57754000	38	NaN	0	NaN	NaN	NaN	0.810067	NaN	NaN	0.76517	Q8NFH5-2;Q8NFH5	38;55	Q8NFH5-2	Q8NFH5-2	Nucleoporin NUP53	NUP35	MGDLPAPVTPQPRSISGPSVGVMEMRSPLLA	sp|Q8NFH5-2|NUP35_HUMAN Isoform 2 of Nucleoporin NUP35 OS=Homo sapiens OX=9606 GN=NUP35;sp|Q8NFH5|NUP35_HUMAN Nucleoporin NUP35 OS=Homo sapiens OX=9606 GN=NUP35 PE=1 SV=1	1	4546	0	NaN	NaN	NaN	NaN	NaN	NaN	NaN	NaN	NaN	NaN	NaN	NaN	NaN	NaN	NaN	NaN	NaN
UID21652	S	2	___1	S(0.87)RS(0.128)PFS(0.001)TTR	0.870202	0.00139998	87.216	56.48	45.908	0.42656	265930000	68	0.579064	NaN	0.870202	NaN	0	0.594499	NaN	NaN	NaN	Q8NG27;Q8NG27-3;Q8NG27-2	68;13;68	Q8NG27	Q8NG27	E3 ubiquitin-protein ligase Praja-1	PJA1	EVPMHRSAPSQTTKRSRSPFSTTRRSWDDSE	sp|Q8NG27|PJA1_HUMAN E3 ubiquitin-protein ligase Praja-1 OS=Homo sapiens OX=9606 GN=PJA1 PE=1 SV=2;sp|Q8NG27-3|PJA1_HUMAN Isoform 3 of E3 ubiquitin-protein ligase Praja-1 OS=Homo sapiens OX=9606 GN=PJA1;sp|Q8NG27-2|PJA1_HUMAN Isoform 2 of E3 ubiquitin-prot	1	4561	0	NaN	NaN	NaN	NaN	NaN	NaN	NaN	NaN	NaN	NaN	NaN	NaN	NaN	NaN	NaN	NaN	NaN
UID21736	S	3	___1	KT(0.022)S(0.352)S(0.563)S(0.063)T(0.001)SPLEPPSDR	0.562637	2.28e-11	132.61	101.09	130.05	0.038974	242840000	456	NaN	0.490631	0	0	0	0.562637	NaN	NaN	0	Q8NI35;Q8NI35-4;Q8NI35-3;Q8NI35-2	456;456;456;456	Q8NI35	Q8NI35	InaD-like protein	INADL	AGQVVHLTLVRRKTSSSTSPLEPPSDRGTVV	sp|Q8NI35|INADL_HUMAN InaD-like protein OS=Homo sapiens OX=9606 GN=PATJ PE=1 SV=3;sp|Q8NI35-4|INADL_HUMAN Isoform 4 of InaD-like protein OS=Homo sapiens OX=9606 GN=PATJ;sp|Q8NI35-3|INADL_HUMAN Isoform 3 of InaD-like protein OS=Homo sapiens OX=9606 GN=PATJ;	1	4576	0	NaN	NaN	NaN	NaN	NaN	NaN	NaN	NaN	NaN	NaN	NaN	NaN	NaN	NaN	NaN	NaN	NaN
UID21741	S	3	___1	NAGNPVVFIVQS(0.045)LS(0.533)S(0.275)T(0.147)PR	0.53286	0.000172286	81.144	66.986	81.144	0.81431	3497500	1160	NaN	NaN	NaN	NaN	0.391261	0.53286	NaN	NaN	0.314872	Q8NI35;Q8NI35-4;Q8NI35-3;Q8NI35-2;Q8NI35-5	1160;1160;1160;1160;619	Q8NI35	Q8NI35	InaD-like protein	INADL	IKNAGNPVVFIVQSLSSTPRVIPNVHNKANK	sp|Q8NI35|INADL_HUMAN InaD-like protein OS=Homo sapiens OX=9606 GN=PATJ PE=1 SV=3;sp|Q8NI35-4|INADL_HUMAN Isoform 4 of InaD-like protein OS=Homo sapiens OX=9606 GN=PATJ;sp|Q8NI35-3|INADL_HUMAN Isoform 3 of InaD-like protein OS=Homo sapiens OX=9606 GN=PATJ;	1	4576	0	NaN	NaN	NaN	NaN	NaN	NaN	NaN	NaN	NaN	NaN	NaN	NaN	NaN	NaN	NaN	NaN	NaN
UID21776	S	3	___1	T(0.008)NS(0.971)VEES(0.021)KEGNER	0.971355	0.0037597	66.12	37.314	66.12	0.026867	58358000	344	NaN	NaN	NaN	NaN	0.940229	0.971355	NaN	NaN	0	Q8TAK5	344	Q8TAK5	Q8TAK5	GA-binding protein subunit beta-2	GABPB2	KLPLTKKPRIGEKTNSVEESKEGNERELLQQ	sp|Q8TAK5|GABP2_HUMAN GA-binding protein subunit beta-2 OS=Homo sapiens OX=9606 GN=GABPB2 PE=1 SV=1	1	4587	0	NaN	NaN	NaN	NaN	NaN	NaN	NaN	NaN	NaN	NaN	NaN	NaN	NaN	NaN	NaN	NaN	NaN
UID21865	S	3	___1	TLVIT(0.02)S(0.683)T(0.076)PAS(0.221)PNR	0.682633	0.00048915	89.013	65.026	50.608	0.57724	72360000	164	NaN	0.424859	NaN	NaN	0.682633	NaN	NaN	NaN	NaN	Q8TBN0	164	Q8TBN0	Q8TBN0	Guanine nucleotide exchange factor for Rab-3A	RAB3IL1	MLQAEVTALKTLVITSTPASPNRELHPQLLS	sp|Q8TBN0|R3GEF_HUMAN Guanine nucleotide exchange factor for Rab-3A OS=Homo sapiens OX=9606 GN=RAB3IL1 PE=1 SV=1	1	4611	0	NaN	NaN	NaN	NaN	NaN	NaN	NaN	NaN	NaN	NaN	NaN	NaN	NaN	NaN	NaN	NaN	NaN
UID21968	S	4	___1	AAS(0.001)PPLKGS(0.998)VSSEASELDKK	0.998279	1.59e-07	105.56	90.628	105.56	0.25354	91612000	545	NaN	NaN	NaN	NaN	0.998279	NaN	NaN	NaN	NaN	Q8TDB6	545	Q8TDB6	Q8TDB6	E3 ubiquitin-protein ligase DTX3L	DTX3L	IDSDDSKAASPPLKGSVSSEASELDKKEKGI	sp|Q8TDB6|DTX3L_HUMAN E3 ubiquitin-protein ligase DTX3L OS=Homo sapiens OX=9606 GN=DTX3L PE=1 SV=1	1	4638	0	NaN	NaN	NaN	NaN	NaN	NaN	NaN	NaN	NaN	NaN	NaN	NaN	NaN	NaN	NaN	NaN	NaN
UID22002	S	4	___1	RLS(0.366)MS(0.634)EVKDDNSATK	0.633878	0.00973567	60.474	43.595	60.474	-0.48863	148130000	1558	0	0	0	0	NaN	0.633878	0	0	0	Q8TDM6-4;Q8TDM6;Q8TDM6-2;Q8TDM6-5	1558;1668;1328;423	Q8TDM6-4	Q8TDM6-4	Disks large homolog 5	DLG5	SKYVMDQEFSRRLSMSEVKDDNSATKTLSAA	sp|Q8TDM6-4|DLG5_HUMAN Isoform 4 of Disks large homolog 5 OS=Homo sapiens OX=9606 GN=DLG5;sp|Q8TDM6|DLG5_HUMAN Disks large homolog 5 OS=Homo sapiens OX=9606 GN=DLG5 PE=1 SV=4;sp|Q8TDM6-2|DLG5_HUMAN Isoform 2 of Disks large homolog 5 OS=Homo sapiens OX=9606	1	4642	0	NaN	NaN	NaN	NaN	NaN	NaN	NaN	NaN	NaN	NaN	NaN	NaN	NaN	NaN	NaN	NaN	NaN
UID22027	S	2	___1	ASVSQT(0.004)S(0.242)PQS(0.656)AS(0.096)S(0.002)PR	0.656208	6.96e-71	230.97	184.09	230.97	0.13578	22879000	650	0	NaN	0	NaN	NaN	0.656208	NaN	NaN	0	Q8TDY2-2;Q8TDY2	650;650	Q8TDY2-2	Q8TDY2-2	RB1-inducible coiled-coil protein 1	RB1CC1	LLSEQKASVSQTSPQSASSPRMESTAGITTT	sp|Q8TDY2-2|RBCC1_HUMAN Isoform 2 of RB1-inducible coiled-coil protein 1 OS=Homo sapiens OX=9606 GN=RB1CC1;sp|Q8TDY2|RBCC1_HUMAN RB1-inducible coiled-coil protein 1 OS=Homo sapiens OX=9606 GN=RB1CC1 PE=1 SV=3	1	4648	0	NaN	NaN	NaN	NaN	NaN	NaN	NaN	NaN	NaN	NaN	NaN	NaN	NaN	NaN	NaN	NaN	NaN
UID22097	S	3	___1	T(0.199)CS(0.797)PFT(0.004)EEFEPLPSK	0.796861	0.000367511	81.01	60.629	81.01	1.1567	49524000	400	NaN	NaN	NaN	NaN	NaN	0.796861	NaN	NaN	NaN	Q8TE85-4;Q8TE85-3;Q8TE85-5;Q8TE85-2;Q8TE85	400;447;493;498;493	Q8TE85-4	Q8TE85-4	Grainyhead-like protein 3 homolog	GRHL3	AGPSSSNRLPLKRTCSPFTEEFEPLPSKQAK	sp|Q8TE85-4|GRHL3_HUMAN Isoform 4 of Grainyhead-like protein 3 homolog OS=Homo sapiens OX=9606 GN=GRHL3;sp|Q8TE85-3|GRHL3_HUMAN Isoform 3 of Grainyhead-like protein 3 homolog OS=Homo sapiens OX=9606 GN=GRHL3;sp|Q8TE85-5|GRHL3_HUMAN Isoform 5 of Grainyhead-	1	4659	0	NaN	NaN	NaN	NaN	NaN	NaN	NaN	NaN	NaN	NaN	NaN	NaN	NaN	NaN	NaN	NaN	NaN
UID22111	S	3	___1	T(0.378)LRES(0.623)DS(1)AEGDEAESPEQQVR	0.99963	2.41e-47	181.43	155.61	90.166	-0.71931	114930000	538	NaN	NaN	0	0	0.746299	NaN	NaN	0.99963	NaN	Q8TEH3;Q8TEH3-7;Q8TEH3-6	538;539;549	Q8TEH3	Q8TEH3	DENN domain-containing protein 1A	DENND1A	SPEQPQPYRTLRESDSAEGDEAESPEQQVRK	sp|Q8TEH3|DEN1A_HUMAN DENN domain-containing protein 1A OS=Homo sapiens OX=9606 GN=DENND1A PE=1 SV=2;sp|Q8TEH3-7|DEN1A_HUMAN Isoform 7 of DENN domain-containing protein 1A OS=Homo sapiens OX=9606 GN=DENND1A;sp|Q8TEH3-6|DEN1A_HUMAN Isoform 6 of DENN domain-	1;2	4665	0	NaN	NaN	NaN	NaN	NaN	NaN	NaN	NaN	NaN	NaN	NaN	NaN	NaN	NaN	NaN	NaN	NaN
UID22168	S	3	___1	QISLAPETLDS(0.005)S(0.018)GDVS(0.977)PGPR	0.97652	3.71e-25	154.77	129.76	105.79	0.15487	182850000	1474	0	0.827826	NaN	0.97652	NaN	0.726746	0.967832	0.948367	0	Q8TER5;Q8TER5-2	1474;760	Q8TER5	Q8TER5	Rho guanine nucleotide exchange factor 40	ARHGEF40	QISLAPETLDSSGDVSPGPRNSPSLQPPHPG	sp|Q8TER5|ARH40_HUMAN Rho guanine nucleotide exchange factor 40 OS=Homo sapiens OX=9606 GN=ARHGEF40 PE=1 SV=3;sp|Q8TER5-2|ARH40_HUMAN Isoform 2 of Rho guanine nucleotide exchange factor 40 OS=Homo sapiens OX=9606 GN=ARHGEF40	1	4671	0	NaN	NaN	NaN	NaN	NaN	NaN	NaN	NaN	NaN	NaN	NaN	NaN	NaN	NaN	NaN	NaN	NaN
UID22215	S	3	___1	QFS(0.988)DAS(0.012)QLDFVK	0.987729	3.51e-06	114.63	82.475	114.63	-0.027787	36920000	837	NaN	0.817273	NaN	NaN	NaN	0.987729	NaN	0.725391	NaN	Q8TEW0-4;Q8TEW0-11;Q8TEW0-2;Q8TEW0;Q8TEW0-5;Q8TEW0-8	837;821;834;837;777;834	Q8TEW0-4	Q8TEW0-4	Partitioning defective 3 homolog	PARD3	GFGRQSMSEKRTKQFSDASQLDFVKTRKSKS	sp|Q8TEW0-4|PARD3_HUMAN Isoform 4 of Partitioning defective 3 homolog OS=Homo sapiens OX=9606 GN=PARD3;sp|Q8TEW0-11|PARD3_HUMAN Isoform 11 of Partitioning defective 3 homolog OS=Homo sapiens OX=9606 GN=PARD3;sp|Q8TEW0-2|PARD3_HUMAN Isoform 2 of Partitionin	1	4675	0	NaN	NaN	NaN	NaN	NaN	NaN	NaN	NaN	NaN	NaN	NaN	NaN	NaN	NaN	NaN	NaN	NaN
UID22232	S	4	___1	TFGCDDELMYGGVS(0.004)S(0.016)YEGS(0.252)MALNARPQS(0.728)PR	0.727955	9.64e-33	119.7	104.99	109.85	-0.13995	246120000	1079	NaN	0.312076	NaN	NaN	0.546732	0.707077	NaN	0.727955	NaN	Q8TEW0-4;Q8TEW0-11;Q8TEW0-2;Q8TEW0;Q8TEW0-5;Q8TEW0-7;Q8TEW0-6;Q8TEW0-3	1079;1100;1113;1116;1004;1033;1070;1026	Q8TEW0-4	Q8TEW0-4	Partitioning defective 3 homolog	PARD3	VSSYEGSMALNARPQSPREGHMMDALYAQVK	sp|Q8TEW0-4|PARD3_HUMAN Isoform 4 of Partitioning defective 3 homolog OS=Homo sapiens OX=9606 GN=PARD3;sp|Q8TEW0-11|PARD3_HUMAN Isoform 11 of Partitioning defective 3 homolog OS=Homo sapiens OX=9606 GN=PARD3;sp|Q8TEW0-2|PARD3_HUMAN Isoform 2 of Partitionin	1	4675	0	NaN	NaN	NaN	NaN	NaN	NaN	NaN	NaN	NaN	NaN	NaN	NaN	NaN	NaN	NaN	NaN	NaN
UID22269	S	4	___1	S(1)PS(1)PVPQEEHS(0.999)DPEMT(0.001)EEEK	1	2.58e-13	135.25	94.285	84.933	-0.18631	4144000000	313	0.999858	0.999909	0.999997	0.999997	0.999993	0.999996	1	0.999992	0.999999	Q8TF01;Q8TF01-2	313;313	Q8TF01	Q8TF01	Arginine/serine-rich protein PNISR	PNISR	ENVEAASSGKVTRSPSPVPQEEHSDPEMTEE	sp|Q8TF01|PNISR_HUMAN Arginine/serine-rich protein PNISR OS=Homo sapiens OX=9606 GN=PNISR PE=1 SV=2;sp|Q8TF01-2|PNISR_HUMAN Isoform 2 of Arginine/serine-rich protein PNISR OS=Homo sapiens OX=9606 GN=PNISR	1;2;3	4680	0	NaN	NaN	NaN	NaN	NaN	NaN	NaN	NaN	NaN	NaN	NaN	NaN	NaN	NaN	NaN	NaN	NaN
UID22282	S	3	___1	NKS(1)S(1)LLFK	1	0.00268351	86.114	62.264	76.533	-0.053684	212550000	594	0	0.898265	0	NaN	1	0	1	1	NaN	Q8TF40;Q8TF40-3	594;566	Q8TF40	Q8TF40	Folliculin-interacting protein 1	FNIP1	EESEYVLVTMHRNKSSLLFKESEEIRTPNCN	sp|Q8TF40|FNIP1_HUMAN Folliculin-interacting protein 1 OS=Homo sapiens OX=9606 GN=FNIP1 PE=1 SV=3;sp|Q8TF40-3|FNIP1_HUMAN Isoform 3 of Folliculin-interacting protein 1 OS=Homo sapiens OX=9606 GN=FNIP1	1;2	4684	0	NaN	NaN	NaN	NaN	NaN	NaN	NaN	NaN	NaN	NaN	NaN	NaN	NaN	NaN	NaN	NaN	NaN
UID22287	S	2	___1	SAS(0.165)LS(0.825)S(0.01)LLITPFPSPNSSLTR	0.824927	3.45e-72	201.18	173.84	201.18	-0.64682	10370000	263	NaN	0	NaN	NaN	0.824927	NaN	NaN	NaN	0	Q8TF40;Q8TF40-2;Q8TF40-3	263;263;235	Q8TF40	Q8TF40	Folliculin-interacting protein 1	FNIP1	LNEDRDSGIARSASLSSLLITPFPSPNSSLT	sp|Q8TF40|FNIP1_HUMAN Folliculin-interacting protein 1 OS=Homo sapiens OX=9606 GN=FNIP1 PE=1 SV=3;sp|Q8TF40-2|FNIP1_HUMAN Isoform 2 of Folliculin-interacting protein 1 OS=Homo sapiens OX=9606 GN=FNIP1;sp|Q8TF40-3|FNIP1_HUMAN Isoform 3 of Folliculin-interac	1	4684	0	NaN	NaN	NaN	NaN	NaN	NaN	NaN	NaN	NaN	NaN	NaN	NaN	NaN	NaN	NaN	NaN	NaN
UID22307	S	4	___1	AQS(1)AYLQPGPAALEGSGLAS(0.008)AS(0.512)S(0.442)LS(0.019)S(0.018)LREPS(0.003)LQPR	0.999696	5.48e-140	222.65	203.77	180.75	-0.094139	280080000	1118	0.997677	0	NaN	NaN	0.998671	0.998124	NaN	0.999696	0.999489	Q8TF72	1118	Q8TF72	Q8TF72	Protein Shroom3	SHROOM3	GCSLQEPGPLRERAQSAYLQPGPAALEGSGL	sp|Q8TF72|SHRM3_HUMAN Protein Shroom3 OS=Homo sapiens OX=9606 GN=SHROOM3 PE=1 SV=2	1;2	4689	0	NaN	NaN	NaN	NaN	NaN	NaN	NaN	NaN	NaN	NaN	NaN	NaN	NaN	NaN	NaN	NaN	NaN
UID22326	S	2	___1	IS(0.066)ES(0.934)VLR	0.933608	1.05e-25	120.82	102.68	115.49	-0.091671	417450000	1492	NaN	NaN	0	0.584123	0.597822	0.933608	0	0	0.66671	Q8TF72	1492	Q8TF72	Q8TF72	Protein Shroom3	SHROOM3	GAPSTPGRISLRISESVLRDSPPPHEDYEDE	sp|Q8TF72|SHRM3_HUMAN Protein Shroom3 OS=Homo sapiens OX=9606 GN=SHROOM3 PE=1 SV=2	1;2	4689	0	NaN	NaN	NaN	NaN	NaN	NaN	NaN	NaN	NaN	NaN	NaN	NaN	NaN	NaN	NaN	NaN	NaN
UID22348	S	3	___1	S(0.718)RS(0.278)S(0.004)PATADK	0.718124	0.0036863	69.345	37.914	69.345	0.20473	183550000	1240	0.494462	NaN	NaN	NaN	0.718124	0.440421	0.456318	NaN	0.42306	Q8TF72	1240	Q8TF72	Q8TF72	Protein Shroom3	SHROOM3	LLERSDVLAGPVHVRSRSSPATADKRQDVLL	sp|Q8TF72|SHRM3_HUMAN Protein Shroom3 OS=Homo sapiens OX=9606 GN=SHROOM3 PE=1 SV=2	1	4689	0	NaN	NaN	NaN	NaN	NaN	NaN	NaN	NaN	NaN	NaN	NaN	NaN	NaN	NaN	NaN	NaN	NaN
UID22351	S	2	___1	T(0.003)VS(0.225)S(0.77)S(0.002)GCEGK	0.769746	4.56e-07	157.97	130.15	157.97	0.16764	13307000	1726	0	0	0.482319	0.388019	0.769746	0.42096	NaN	0.434403	0.493809	Q8TF72	1726	Q8TF72	Q8TF72	Protein Shroom3	SHROOM3	KENSVKRKAIQRTVSSSGCEGKRNEDKEAVS	sp|Q8TF72|SHRM3_HUMAN Protein Shroom3 OS=Homo sapiens OX=9606 GN=SHROOM3 PE=1 SV=2	1	4689	0	NaN	NaN	NaN	NaN	NaN	NaN	NaN	NaN	NaN	NaN	NaN	NaN	NaN	NaN	NaN	NaN	NaN
UID22372	S	3	___1	LT(0.108)S(0.736)T(0.151)S(0.005)TSDTQNINNSAQR	0.735537	8.16e-34	171	143.67	157	0.067612	102950000	327	NaN	0.735537	NaN	NaN	0.733573	0	NaN	NaN	NaN	Q8WU20	327	Q8WU20	Q8WU20	Fibroblast growth factor receptor substrate 2	FRS2	LSIPSASGVRRGRLTSTSTSDTQNINNSAQR	sp|Q8WU20|FRS2_HUMAN Fibroblast growth factor receptor substrate 2 OS=Homo sapiens OX=9606 GN=FRS2 PE=1 SV=4	1	4696	0	NaN	NaN	NaN	NaN	NaN	NaN	NaN	NaN	NaN	NaN	NaN	NaN	NaN	NaN	NaN	NaN	NaN
UID22419	S	4	___1	AGPPAPAPPAPIPPPAPS(0.015)QS(0.21)S(0.774)PPEQPQS(0.002)MEMR	0.773706	1.83e-07	70.605	64.242	70.605	0.33189	138210000	597	NaN	0.326808	0.330063	NaN	NaN	0.773706	NaN	0.328604	0.330846	Q8WUF5	597	Q8WUF5	Q8WUF5	RelA-associated inhibitor	PPP1R13L	PAPPAPIPPPAPSQSSPPEQPQSMEMRSVLR	sp|Q8WUF5|IASPP_HUMAN RelA-associated inhibitor OS=Homo sapiens OX=9606 GN=PPP1R13L PE=1 SV=4	1	4704	0	NaN	NaN	NaN	NaN	NaN	NaN	NaN	NaN	NaN	NaN	NaN	NaN	NaN	NaN	NaN	NaN	NaN
UID22503	S	3	___1	S(0.5)YGS(0.5)QEPLAALLEEVITDAK	0.500365	6.45e-13	130.15	117.95	130.15	-0.22028	3355700	445	NaN	NaN	NaN	NaN	0	0.500365	0.498504	0	0	Q8WUY9	445	Q8WUY9	Q8WUY9	DEP domain-containing protein 1B	DEPDC1B	SFCRQISPEEFEYQRSYGSQEPLAALLEEVI	sp|Q8WUY9|DEP1B_HUMAN DEP domain-containing protein 1B OS=Homo sapiens OX=9606 GN=DEPDC1B PE=1 SV=2	1	4719	0	NaN	NaN	NaN	NaN	NaN	NaN	NaN	NaN	NaN	NaN	NaN	NaN	NaN	NaN	NaN	NaN	NaN
UID22507	S	3	___1	GT(0.001)EPS(0.999)PGGT(0.998)PQPS(0.007)RPVS(0.994)PAGPPEGVPEEAQPPR	0.998911	5.97e-113	207.94	193.67	131.4	0.020047	17275000000	114	0.965805	0.998911	0.970129	0.997282	0.98243	0.989825	0.998203	0.966329	0.99046	Q8WUZ0;Q8WUZ0-2	114;114	Q8WUZ0	Q8WUZ0	B-cell CLL/lymphoma 7 protein family member C	BCL7C	QSFHSEGSLQKGTEPSPGGTPQPSRPVSPAG	sp|Q8WUZ0|BCL7C_HUMAN B-cell CLL/lymphoma 7 protein family member C OS=Homo sapiens OX=9606 GN=BCL7C PE=1 SV=3;sp|Q8WUZ0-2|BCL7C_HUMAN Isoform 2 of B-cell CLL/lymphoma 7 protein family member C OS=Homo sapiens OX=9606 GN=BCL7C	1;2;3;4	4720	0	NaN	NaN	NaN	NaN	NaN	NaN	NaN	NaN	NaN	NaN	NaN	NaN	NaN	NaN	NaN	NaN	NaN
UID22541	S	3	___1	S(0.003)ES(0.017)ARGS(0.98)DS(1)EDEVLR	0.999987	6.68e-08	126.61	112.26	126.61	-0.079278	916070000	279	0.63553	0.999827	0.995862	0.989676	0.9994	0.999685	0.999701	0.999987	0.999892	Q8WVC0-2;Q8WVC0	279;279	Q8WVC0-2	Q8WVC0-2	RNA polymerase-associated protein LEO1	LEO1	EEEQDHKSESARGSDSEDEVLRMKRKNAIAS	sp|Q8WVC0-2|LEO1_HUMAN Isoform 2 of RNA polymerase-associated protein LEO1 OS=Homo sapiens OX=9606 GN=LEO1;sp|Q8WVC0|LEO1_HUMAN RNA polymerase-associated protein LEO1 OS=Homo sapiens OX=9606 GN=LEO1 PE=1 SV=1	1;2;3	4729	0	NaN	NaN	NaN	NaN	NaN	NaN	NaN	NaN	NaN	NaN	NaN	NaN	NaN	NaN	NaN	NaN	NaN
UID22556	S	3	___1	MEPNS(1)PKK	1	0.00237394	85.958	63.218	85.958	0.59648	43687000	5	NaN	NaN	0	NaN	NaN	1	NaN	NaN	0	Q8WVI7;Q8WVI7-2	5;5	Q8WVI7	Q8WVI7	Protein phosphatase 1 regulatory subunit 1C	PPP1R1C	___________MEPNSPKKIQFAVPVFQSQI	sp|Q8WVI7|PPR1C_HUMAN Protein phosphatase 1 regulatory subunit 1C OS=Homo sapiens OX=9606 GN=PPP1R1C PE=3 SV=1;sp|Q8WVI7-2|PPR1C_HUMAN Isoform 2 of Protein phosphatase 1 regulatory subunit 1C OS=Homo sapiens OX=9606 GN=PPP1R1C	1	4731	0	NaN	NaN	NaN	NaN	NaN	NaN	NaN	NaN	NaN	NaN	NaN	NaN	NaN	NaN	NaN	NaN	NaN
UID22568	S	3	___1	LTS(0.001)AVS(0.145)S(0.853)LPELLEK	0.853386	0.000188545	84.508	59.186	84.508	-0.048483	4983000	296	NaN	NaN	NaN	NaN	0.853386	NaN	NaN	NaN	NaN	Q8WVM8-2;Q8WVM8-3;Q8WVM8	296;321;388	Q8WVM8-2	Q8WVM8-2	Sec1 family domain-containing protein 1	SCFD1	SMLSDNTAKLTSAVSSLPELLEKKRLIDLHT	sp|Q8WVM8-2|SCFD1_HUMAN Isoform 2 of Sec1 family domain-containing protein 1 OS=Homo sapiens OX=9606 GN=SCFD1;sp|Q8WVM8-3|SCFD1_HUMAN Isoform 3 of Sec1 family domain-containing protein 1 OS=Homo sapiens OX=9606 GN=SCFD1;sp|Q8WVM8|SCFD1_HUMAN Sec1 family do	1	4736	0	NaN	NaN	NaN	NaN	NaN	NaN	NaN	NaN	NaN	NaN	NaN	NaN	NaN	NaN	NaN	NaN	NaN
UID22574	S	3	___1	KS(0.002)S(0.088)PS(0.337)S(0.573)PAVR	0.573142	0.00220628	72.681	60.889	72.681	-0.045207	72114000	117	0	0	0	NaN	0.573142	0	NaN	0	0	Q8WVR3-2;Q8WVR3-3;Q8WVR3	117;124;498	Q8WVR3-2	Q8WVR3-2	Uncharacterized protein C7orf43	C7orf43	PPPEARPLSRKSSPSSPAVRDLVERHQASLG	sp|Q8WVR3-2|MA11_HUMAN Isoform 2 of Microtubule-associated protein 11 OS=Homo sapiens OX=9606 GN=MAP11;sp|Q8WVR3-3|MA11_HUMAN Isoform 3 of Microtubule-associated protein 11 OS=Homo sapiens OX=9606 GN=MAP11;sp|Q8WVR3|MA11_HUMAN Microtubule-associated protei	1	4738	0	NaN	NaN	NaN	NaN	NaN	NaN	NaN	NaN	NaN	NaN	NaN	NaN	NaN	NaN	NaN	NaN	NaN
UID22583	S	3	___1	ANNHQQQQGLQDS(0.024)S(0.664)S(0.312)K	0.66363	2.64e-33	169.58	139.89	169.58	0.049859	19109000	395	0	NaN	NaN	NaN	0.66363	NaN	NaN	0.497265	NaN	Q8WVV4-1;Q8WVV4	395;395	Q8WVV4-1	Q8WVV4-1	Protein POF1B	POF1B	VRANNHQQQQGLQDSSSKCQALEENNLSLRH	sp|Q8WVV4-1|POF1B_HUMAN Isoform 1 of Protein POF1B OS=Homo sapiens OX=9606 GN=POF1B;sp|Q8WVV4|POF1B_HUMAN Protein POF1B OS=Homo sapiens OX=9606 GN=POF1B PE=1 SV=3	1	4741	0	NaN	NaN	NaN	NaN	NaN	NaN	NaN	NaN	NaN	NaN	NaN	NaN	NaN	NaN	NaN	NaN	NaN
UID22589	S	4	___1	ISTCAPSTLHITQNTEQELHS(0.985)PT(0.015)VK	0.985396	1.39e-276	309.5	284.27	309.5	0.044598	179230000	123	0.968615	NaN	NaN	NaN	0.985396	NaN	0	NaN	NaN	Q8WVV4-1;Q8WVV4;Q8WVV4-3	123;123;123	Q8WVV4-1	Q8WVV4-1	Protein POF1B	POF1B	PSTLHITQNTEQELHSPTVKLTTYPQTTIRK	sp|Q8WVV4-1|POF1B_HUMAN Isoform 1 of Protein POF1B OS=Homo sapiens OX=9606 GN=POF1B;sp|Q8WVV4|POF1B_HUMAN Protein POF1B OS=Homo sapiens OX=9606 GN=POF1B PE=1 SV=3;sp|Q8WVV4-3|POF1B_HUMAN Isoform 3 of Protein POF1B OS=Homo sapiens OX=9606 GN=POF1B	1	4741	0	NaN	NaN	NaN	NaN	NaN	NaN	NaN	NaN	NaN	NaN	NaN	NaN	NaN	NaN	NaN	NaN	NaN
UID22650	S	3	___1	RPVDS(1)YDIPK	0.99976	0.00101717	81.632	58.256	81.632	0.32253	897360000	1066	0.999696	NaN	NaN	NaN	0	0.99976	0	0	0	Q8WWI1;Q8WWI1-4;Q8WWI1-2;Q8WWI1-5;Q8WWI1-3	1400;1400;1400;1115;1066	Q8WWI1;Q8WWI1-3	Q8WWI1-3	LIM domain only protein 7	LMO7	RETSVRIYQYRRPVDSYDIPKTEEASSGFLP	sp|Q8WWI1|LMO7_HUMAN LIM domain only protein 7 OS=Homo sapiens OX=9606 GN=LMO7 PE=1 SV=3;sp|Q8WWI1-4|LMO7_HUMAN Isoform 4 of LIM domain only protein 7 OS=Homo sapiens OX=9606 GN=LMO7;sp|Q8WWI1-2|LMO7_HUMAN Isoform 2 of LIM domain only protein 7 OS=Homo sap	1	4750;4751	0	NaN	NaN	NaN	NaN	NaN	NaN	NaN	NaN	NaN	NaN	NaN	NaN	NaN	NaN	NaN	NaN	NaN
UID22653	S	3	___1	S(0.001)QFFEQGS(0.438)S(0.542)DS(0.019)VVPDLPVPTISAPSR	0.541762	7.37e-28	134.14	120.71	91.407	-0.051609	29953000	871	0.496378	NaN	0.499406	NaN	0	0.541762	NaN	0	0	Q8WWI1;Q8WWI1-4;Q8WWI1-2;Q8WWI1-5;Q8WWI1-3	1205;1205;1205;920;871	Q8WWI1;Q8WWI1-3	Q8WWI1-3	LIM domain only protein 7	LMO7	LKNLKRRSQFFEQGSSDSVVPDLPVPTISAP	sp|Q8WWI1|LMO7_HUMAN LIM domain only protein 7 OS=Homo sapiens OX=9606 GN=LMO7 PE=1 SV=3;sp|Q8WWI1-4|LMO7_HUMAN Isoform 4 of LIM domain only protein 7 OS=Homo sapiens OX=9606 GN=LMO7;sp|Q8WWI1-2|LMO7_HUMAN Isoform 2 of LIM domain only protein 7 OS=Homo sap	1	4750;4751	0	NaN	NaN	NaN	NaN	NaN	NaN	NaN	NaN	NaN	NaN	NaN	NaN	NaN	NaN	NaN	NaN	NaN
UID22654	S	4	___1	T(0.001)PNNVVS(0.557)T(0.442)PAPS(0.001)PDASQLASSLSSQK	0.556578	1.28e-15	101.37	86.278	101.37	0.32086	680860000	621	0.543104	0	0	0	0.556578	0.553767	0.453982	0	NaN	Q8WWI1;Q8WWI1-4;Q8WWI1-2;Q8WWI1-5;Q8WWI1-3	955;955;955;670;621	Q8WWI1;Q8WWI1-3	Q8WWI1-3	LIM domain only protein 7	LMO7	NGDVEDIKRTPNNVVSTPAPSPDASQLASSL	sp|Q8WWI1|LMO7_HUMAN LIM domain only protein 7 OS=Homo sapiens OX=9606 GN=LMO7 PE=1 SV=3;sp|Q8WWI1-4|LMO7_HUMAN Isoform 4 of LIM domain only protein 7 OS=Homo sapiens OX=9606 GN=LMO7;sp|Q8WWI1-2|LMO7_HUMAN Isoform 2 of LIM domain only protein 7 OS=Homo sap	1;2	4750;4751	0	NaN	NaN	NaN	NaN	NaN	NaN	NaN	NaN	NaN	NaN	NaN	NaN	NaN	NaN	NaN	NaN	NaN
UID22665	S	2	___1	S(0.997)LT(0.003)SCSSDITLR	0.996828	5.68e-10	131.79	100.2	131.79	0.36121	293100000	257	0.91233	0	0.996828	0.996246	NaN	0.959431	0	0.863501	0	Q8WWI1;Q8WWI1-4;Q8WWI1-2;Q8WWI1-3	257;257;257;257	Q8WWI1;Q8WWI1-3	Q8WWI1-3	LIM domain only protein 7	LMO7	KREDSFESLDSLGSRSLTSCSSDITLRGGRE	sp|Q8WWI1|LMO7_HUMAN LIM domain only protein 7 OS=Homo sapiens OX=9606 GN=LMO7 PE=1 SV=3;sp|Q8WWI1-4|LMO7_HUMAN Isoform 4 of LIM domain only protein 7 OS=Homo sapiens OX=9606 GN=LMO7;sp|Q8WWI1-2|LMO7_HUMAN Isoform 2 of LIM domain only protein 7 OS=Homo sap	1	4750;4751	0	NaN	NaN	NaN	NaN	NaN	NaN	NaN	NaN	NaN	NaN	NaN	NaN	NaN	NaN	NaN	NaN	NaN
UID22684	S	3	___1	GS(0.929)S(0.071)GDRPEASMTPDAK	0.928823	0.00981688	55.588	38.708	55.588	0.66955	40533000	374	NaN	NaN	NaN	NaN	NaN	0.928823	NaN	0	NaN	Q8WWL2-4;Q8WWL2-3;Q8WWL2-2;Q8WWL2	374;459;507;507	Q8WWL2-4	Q8WWL2-4	Protein spire homolog 2	SPIRE2	ASVSDPSHPLLSNRGSSGDRPEASMTPDAKH	sp|Q8WWL2-4|SPIR2_HUMAN Isoform 4 of Protein spire homolog 2 OS=Homo sapiens OX=9606 GN=SPIRE2;sp|Q8WWL2-3|SPIR2_HUMAN Isoform 3 of Protein spire homolog 2 OS=Homo sapiens OX=9606 GN=SPIRE2;sp|Q8WWL2-2|SPIR2_HUMAN Isoform 2 of Protein spire homolog 2 OS=Ho	1	4754	0	NaN	NaN	NaN	NaN	NaN	NaN	NaN	NaN	NaN	NaN	NaN	NaN	NaN	NaN	NaN	NaN	NaN
UID22722	S	3	___1	QLLFEDT(0.099)S(0.895)LT(0.006)FGTSSR	0.894829	0.0020652	65.149	52.382	65.149	-0.41606	17323000	1796	NaN	0	0	NaN	NaN	0.894829	NaN	NaN	NaN	Q8WWQ0	1796	Q8WWQ0	Q8WWQ0	PH-interacting protein	PHIP	DDSEEEQRQLLFEDTSLTFGTSSRGRVRKLT	sp|Q8WWQ0|PHIP_HUMAN PH-interacting protein OS=Homo sapiens OX=9606 GN=PHIP PE=1 SV=2	1	4758	0	NaN	NaN	NaN	NaN	NaN	NaN	NaN	NaN	NaN	NaN	NaN	NaN	NaN	NaN	NaN	NaN	NaN
UID22766	S	4	___1	LGPRPVPPPRPES(0.943)T(0.053)GT(0.004)VGPGQAQQR	0.942689	6.76e-07	84.097	66.396	84.097	-0.16087	87981000	1053	NaN	NaN	NaN	NaN	0.942689	0.782471	NaN	NaN	0	Q8WXE0-2;Q8WXE0	1053;1135	Q8WXE0-2	Q8WXE0-2	Caskin-2	CASKIN2	APRLGPRPVPPPRPESTGTVGPGQAQQRLEQ	sp|Q8WXE0-2|CSKI2_HUMAN Isoform 2 of Caskin-2 OS=Homo sapiens OX=9606 GN=CASKIN2;sp|Q8WXE0|CSKI2_HUMAN Caskin-2 OS=Homo sapiens OX=9606 GN=CASKIN2 PE=1 SV=2	1	4768	0	NaN	NaN	NaN	NaN	NaN	NaN	NaN	NaN	NaN	NaN	NaN	NaN	NaN	NaN	NaN	NaN	NaN
UID22783	S	4	___1	NLS(0.997)PVVS(0.003)NELLEQAFSQFGPVEK	0.997293	2.06e-131	237.28	218.25	237.28	-1.6715	204690000	164	NaN	NaN	NaN	0	0.996219	0.997293	NaN	NaN	NaN	Q8WXF1;Q8WXF1-2	164;164	Q8WXF1	Q8WXF1	Paraspeckle component 1	PSPC1	IRFATHGAALTVKNLSPVVSNELLEQAFSQF	sp|Q8WXF1|PSPC1_HUMAN Paraspeckle component 1 OS=Homo sapiens OX=9606 GN=PSPC1 PE=1 SV=1;sp|Q8WXF1-2|PSPC1_HUMAN Isoform 2 of Paraspeckle component 1 OS=Homo sapiens OX=9606 GN=PSPC1	1	4771	0	NaN	NaN	NaN	NaN	NaN	NaN	NaN	NaN	NaN	NaN	NaN	NaN	NaN	NaN	NaN	NaN	NaN
UID22789	S	4	___1	CDINGDTPNVDPLT(0.005)HAALGDAS(0.995)EVEIDELQNQK	0.99485	3.32e-11	83.944	72.839	83.944	-0.14859	35806000	669	NaN	NaN	0.99485	NaN	NaN	0.994618	NaN	NaN	NaN	Q8WXG6-8;Q8WXG6-5;Q8WXG6-4;Q8WXG6-3;Q8WXG6-2;Q8WXG6-6;Q8WXG6;Q8WXG6-7	669;669;669;669;669;669;669;669	Q8WXG6-8	Q8WXG6-8	MAP kinase-activating death domain protein	MADD	TPNVDPLTHAALGDASEVEIDELQNQKEAEE	sp|Q8WXG6-8|MADD_HUMAN Isoform 8 of MAP kinase-activating death domain protein OS=Homo sapiens OX=9606 GN=MADD;sp|Q8WXG6-5|MADD_HUMAN Isoform 5 of MAP kinase-activating death domain protein OS=Homo sapiens OX=9606 GN=MADD;sp|Q8WXG6-4|MADD_HUMAN Isoform 4 o	1	4773	0	NaN	NaN	NaN	NaN	NaN	NaN	NaN	NaN	NaN	NaN	NaN	NaN	NaN	NaN	NaN	NaN	NaN
UID22798	S	2	___1	LAS(0.003)DS(0.444)DAES(0.552)DSR	0.552129	1.32e-28	194.06	164.05	194.06	0.072309	38912000	781	NaN	NaN	NaN	0	0	0.552129	NaN	0	NaN	Q8WXG6-8;Q8WXG6-5;Q8WXG6-4;Q8WXG6-3;Q8WXG6-2;Q8WXG6-6;Q8WXG6;Q8WXG6-7	781;781;781;824;824;781;824;824	Q8WXG6-8	Q8WXG6-8	MAP kinase-activating death domain protein	MADD	LRPNSLRLASDSDAESDSRASSPNSTVSNTS	sp|Q8WXG6-8|MADD_HUMAN Isoform 8 of MAP kinase-activating death domain protein OS=Homo sapiens OX=9606 GN=MADD;sp|Q8WXG6-5|MADD_HUMAN Isoform 5 of MAP kinase-activating death domain protein OS=Homo sapiens OX=9606 GN=MADD;sp|Q8WXG6-4|MADD_HUMAN Isoform 4 o	1	4773	0	NaN	NaN	NaN	NaN	NaN	NaN	NaN	NaN	NaN	NaN	NaN	NaN	NaN	NaN	NaN	NaN	NaN
UID22804	S	4	___1	DMEEDRAS(0.787)S(0.366)S(0.688)S(0.154)GT(0.006)IVQEAYGK	0.786793	1.37e-12	120.42	105.87	120.42	0.17927	472210000	4156	0	0.713127	0.315303	0	0	0.71301	0.598415	0.786793	0.648705	Q8WXH0;Q8WXH0-2;Q8WXH0-7	4156;4156;541	Q8WXH0	Q8WXH0	Nesprin-2	SYNE2	SSLWKHDKDMEEDRASSSSGTIVQEAYGKIS	sp|Q8WXH0|SYNE2_HUMAN Nesprin-2 OS=Homo sapiens OX=9606 GN=SYNE2 PE=1 SV=3;sp|Q8WXH0-2|SYNE2_HUMAN Isoform 2 of Nesprin-2 OS=Homo sapiens OX=9606 GN=SYNE2;sp|Q8WXH0-7|SYNE2_HUMAN Isoform 7 of Nesprin-2 OS=Homo sapiens OX=9606 GN=SYNE2	1;2	4774	0	NaN	NaN	NaN	NaN	NaN	NaN	NaN	NaN	NaN	NaN	NaN	NaN	NaN	NaN	NaN	NaN	NaN
UID22882	S	3	___1	S(0.006)S(0.226)S(0.756)S(0.012)DSIHSVR	0.755576	7.84e-11	152.16	116.96	125.84	0.33542	63682000	625	NaN	NaN	NaN	0.477477	0.67865	0.755576	0	NaN	NaN	Q8WYL5-4;Q8WYL5	625;937	Q8WYL5-4	Q8WYL5-4	Protein phosphatase Slingshot homolog 1	SSH1	TPTSSSMSSNLTRSSSSDSIHSVRGKPGLVK	sp|Q8WYL5-4|SSH1_HUMAN Isoform 4 of Protein phosphatase Slingshot homolog 1 OS=Homo sapiens OX=9606 GN=SSH1;sp|Q8WYL5|SSH1_HUMAN Protein phosphatase Slingshot homolog 1 OS=Homo sapiens OX=9606 GN=SSH1 PE=1 SV=2	1	4789	0	NaN	NaN	NaN	NaN	NaN	NaN	NaN	NaN	NaN	NaN	NaN	NaN	NaN	NaN	NaN	NaN	NaN
UID22920	S	2	___1	STPLASPS(0.995)PS(0.005)PGR	0.994979	3.57e-23	162.88	138.1	162.88	0.0021966	1052800000	1216	0.846706	0.720574	NaN	0.758206	NaN	0.994979	0	0.905377	0.85631	Q8WYP5;Q8WYP5-3;Q8WYP5-2	1216;1225;1251	Q8WYP5	Q8WYP5	Protein ELYS	AHCTF1	SILRSTLRSTPLASPSPSPGRSPQRLKETRI	sp|Q8WYP5|ELYS_HUMAN Protein ELYS OS=Homo sapiens OX=9606 GN=AHCTF1 PE=1 SV=3;sp|Q8WYP5-3|ELYS_HUMAN Isoform 3 of Protein ELYS OS=Homo sapiens OX=9606 GN=AHCTF1;sp|Q8WYP5-2|ELYS_HUMAN Isoform 2 of Protein ELYS OS=Homo sapiens OX=9606 GN=AHCTF1	1;2;3	4791	0	NaN	NaN	NaN	NaN	NaN	NaN	NaN	NaN	NaN	NaN	NaN	NaN	NaN	NaN	NaN	NaN	NaN
UID22942	S	3	___1	S(1)FNCLEDTEPEAPLGQPK	0.999998	1.04e-17	149.84	128.89	127.92	-0.80843	140510000	1632	NaN	0	0.999754	NaN	0.999998	0.999978	NaN	NaN	NaN	Q8WZ64	1632	Q8WZ64	Q8WZ64	Arf-GAP with Rho-GAP domain, ANK repeat and PH domain-containing protein 2	ARAP2	EHKDDKLRNRPRKHRSFNCLEDTEPEAPLGQ	sp|Q8WZ64|ARAP2_HUMAN Arf-GAP with Rho-GAP domain, ANK repeat and PH domain-containing protein 2 OS=Homo sapiens OX=9606 GN=ARAP2 PE=1 SV=3	1	4795	0	NaN	NaN	NaN	NaN	NaN	NaN	NaN	NaN	NaN	NaN	NaN	NaN	NaN	NaN	NaN	NaN	NaN
UID22952	S	4	___1	QAS(0.984)Y(0.015)GDLIGAS(0.001)VPAFPPPSANK	0.984043	0.000712055	61.45	44.765	49.088	-0.14401	75052000	361	NaN	0.766482	NaN	NaN	0.981908	NaN	NaN	0.984043	NaN	Q8WZ74	361	Q8WZ74	Q8WZ74	Cortactin-binding protein 2	CTTNBP2	CTSATMARPGIDRQASYGDLIGASVPAFPPP	sp|Q8WZ74|CTTB2_HUMAN Cortactin-binding protein 2 OS=Homo sapiens OX=9606 GN=CTTNBP2 PE=1 SV=1	1	4797	0	NaN	NaN	NaN	NaN	NaN	NaN	NaN	NaN	NaN	NaN	NaN	NaN	NaN	NaN	NaN	NaN	NaN
UID23004	S	4	___1	ENLILQETSVIESLAADGS(1)PGLK	0.999996	3.62e-29	155.51	136.91	155.51	-0.57667	233460000	520	NaN	NaN	0.999996	NaN	0.972974	NaN	NaN	NaN	NaN	Q92540-2;Q92540;Q92540-5;Q92540-4	520;520;478;520	Q92540-2	Q92540-2	Protein SMG7	SMG7	ILQETSVIESLAADGSPGLKSVLSTSRNLSN	sp|Q92540-2|SMG7_HUMAN Isoform 2 of Protein SMG7 OS=Homo sapiens OX=9606 GN=SMG7;sp|Q92540|SMG7_HUMAN Protein SMG7 OS=Homo sapiens OX=9606 GN=SMG7 PE=1 SV=2;sp|Q92540-5|SMG7_HUMAN Isoform 5 of Protein SMG7 OS=Homo sapiens OX=9606 GN=SMG7;sp|Q92540-4|SMG7_H	1	4812	0	NaN	NaN	NaN	NaN	NaN	NaN	NaN	NaN	NaN	NaN	NaN	NaN	NaN	NaN	NaN	NaN	NaN
UID23089	S	3	___1	S(0.245)FS(0.755)LDEPPLFIPDNIATIR	0.754579	2e-25	159.46	142.72	159.46	-0.3777	311750000	594	NaN	0	NaN	NaN	0.754579	0	0	0.54018	NaN	Q92576-2;Q92576	594;682	Q92576-2	Q92576-2	PHD finger protein 3	PHF3	EKNLQPRQRRSSKSFSLDEPPLFIPDNIATI	sp|Q92576-2|PHF3_HUMAN Isoform 2 of PHD finger protein 3 OS=Homo sapiens OX=9606 GN=PHF3;sp|Q92576|PHF3_HUMAN PHD finger protein 3 OS=Homo sapiens OX=9606 GN=PHF3 PE=1 SV=3	1	4827	0	NaN	NaN	NaN	NaN	NaN	NaN	NaN	NaN	NaN	NaN	NaN	NaN	NaN	NaN	NaN	NaN	NaN
UID23133	S	2	___1	VS(0.047)NS(0.953)LINFGR	0.952871	0.00233504	81.918	54.82	73.219	0.48603	101860000	460	NaN	0	NaN	NaN	0.952871	0	NaN	0.923762	NaN	Q92609;Q92609-2	460;460	Q92609	Q92609	TBC1 domain family member 5	TBC1D5	TNAKGAPLNINKVSNSLINFGRKLISPAMAP	sp|Q92609|TBCD5_HUMAN TBC1 domain family member 5 OS=Homo sapiens OX=9606 GN=TBC1D5 PE=1 SV=1;sp|Q92609-2|TBCD5_HUMAN Isoform 2 of TBC1 domain family member 5 OS=Homo sapiens OX=9606 GN=TBC1D5	1	4832	0	NaN	NaN	NaN	NaN	NaN	NaN	NaN	NaN	NaN	NaN	NaN	NaN	NaN	NaN	NaN	NaN	NaN
UID23157	S	4	___1	NSSTETDQQPHS(0.972)PDS(0.022)S(0.005)S(0.001)SVHSIR	0.971728	2.25e-14	125.12	117.12	125.12	-0.46202	13940000	566	NaN	NaN	NaN	NaN	0.971728	NaN	NaN	NaN	NaN	Q92613	566	Q92613	Q92613	Protein Jade-3	JADE3	EDHRNSSTETDQQPHSPDSSSSVHSIRNMQV	sp|Q92613|JADE3_HUMAN Protein Jade-3 OS=Homo sapiens OX=9606 GN=JADE3 PE=1 SV=1	1	4834	0	NaN	NaN	NaN	NaN	NaN	NaN	NaN	NaN	NaN	NaN	NaN	NaN	NaN	NaN	NaN	NaN	NaN
UID23190	S	3	___1	VVS(1)LEAELQDISSQESK	1	3.1e-21	147.49	129.12	147.49	1.1082	14284000	1518	NaN	NaN	NaN	NaN	NaN	1	NaN	1	NaN	Q92614;Q92614-3;Q92614-4;Q92614-2;Q92614-5	1518;1518;1518;1187;1060	Q92614	Q92614	Unconventional myosin-XVIIIa	MYO18A	EEKDMDIAGFTQKVVSLEAELQDISSQESKD	sp|Q92614|MY18A_HUMAN Unconventional myosin-XVIIIa OS=Homo sapiens OX=9606 GN=MYO18A PE=1 SV=3;sp|Q92614-3|MY18A_HUMAN Isoform 3 of Unconventional myosin-XVIIIa OS=Homo sapiens OX=9606 GN=MYO18A;sp|Q92614-4|MY18A_HUMAN Isoform 4 of Unconventional myosin-XV	1	4835	0	NaN	NaN	NaN	NaN	NaN	NaN	NaN	NaN	NaN	NaN	NaN	NaN	NaN	NaN	NaN	NaN	NaN
UID23275	S	3	___1	QGQGLSLCQNGES(1)PNCVEDK	1	6.22e-08	110.9	92.142	110.9	0.26893	30142000	347	NaN	NaN	NaN	NaN	NaN	1	NaN	NaN	NaN	Q92664;Q92664-2	347;322	Q92664	Q92664	Transcription factor IIIA	GTF3A	KRKQGQGLSLCQNGESPNCVEDKMLSTVAVL	sp|Q92664|TF3A_HUMAN Transcription factor IIIA OS=Homo sapiens OX=9606 GN=GTF3A PE=1 SV=3;sp|Q92664-2|TF3A_HUMAN Isoform 2 of Transcription factor IIIA OS=Homo sapiens OX=9606 GN=GTF3A	1	4849	0	NaN	NaN	NaN	NaN	NaN	NaN	NaN	NaN	NaN	NaN	NaN	NaN	NaN	NaN	NaN	NaN	NaN
UID23286	S	2	___1	SLLS(0.578)S(0.421)PTK	0.578421	3.9e-27	204.34	115.26	204.34	-0.11055	2401900000	444	NaN	0.499864	NaN	NaN	0.493265	0.578421	NaN	NaN	0.514708	Q92667;Q92667-2	444;444	Q92667	Q92667	A-kinase anchor protein 1, mitochondrial	AKAP1	SPPPKTYVSCLKSLLSSPTKDSKPNISAHHI	sp|Q92667|AKAP1_HUMAN A-kinase anchor protein 1, mitochondrial OS=Homo sapiens OX=9606 GN=AKAP1 PE=1 SV=1;sp|Q92667-2|AKAP1_HUMAN Isoform 2 of A-kinase anchor protein 1, mitochondrial OS=Homo sapiens OX=9606 GN=AKAP1	1;2	4851	0	NaN	NaN	NaN	NaN	NaN	NaN	NaN	NaN	NaN	NaN	NaN	NaN	NaN	NaN	NaN	NaN	NaN
UID23311	S	5	___1	IAAPELHKGDS(1)DS(1)EEDEPTKK	1	5.04e-58	186.91	163.93	185.06	0.39841	17032000000	157	1	1	1	1	1	1	1	1	1	Q92733	157	Q92733	Q92733	Proline-rich protein PRCC	PRCC	KEPVKIAAPELHKGDSDSEEDEPTKKKTILQ	sp|Q92733|PRCC_HUMAN Proline-rich protein PRCC OS=Homo sapiens OX=9606 GN=PRCC PE=1 SV=1	1;2	4859	0	NaN	NaN	NaN	NaN	NaN	NaN	NaN	NaN	NaN	NaN	NaN	NaN	NaN	NaN	NaN	NaN	NaN
UID23340	S	3	___1	TWSEVSYTYRPET(0.016)QGQS(0.979)WT(0.004)R	0.979261	3.1e-06	91.416	75.52	91.416	-0.79571	31248000	751	NaN	0	NaN	NaN	NaN	0.979261	NaN	NaN	NaN	Q92738;Q92738-2	751;768	Q92738	Q92738	USP6 N-terminal-like protein	USP6NL	WSEVSYTYRPETQGQSWTRDASRGNLPKYSA	sp|Q92738|US6NL_HUMAN USP6 N-terminal-like protein OS=Homo sapiens OX=9606 GN=USP6NL PE=1 SV=3;sp|Q92738-2|US6NL_HUMAN Isoform 2 of USP6 N-terminal-like protein OS=Homo sapiens OX=9606 GN=USP6NL	1	4861	0	NaN	NaN	NaN	NaN	NaN	NaN	NaN	NaN	NaN	NaN	NaN	NaN	NaN	NaN	NaN	NaN	NaN
UID23373	S	3	___1	EGLISQDGS(0.184)S(0.816)LEALLR	0.81596	8.48e-24	153.25	127.27	153.25	-0.27617	50540000	118	0	NaN	NaN	NaN	0.81596	0.751951	0.49959	NaN	NaN	Q92785;Q92785-2	118;118	Q92785	Q92785	Zinc finger protein ubi-d4	DPF2	DQTLKKEGLISQDGSSLEALLRTDPLEKRGA	sp|Q92785|REQU_HUMAN Zinc finger protein ubi-d4 OS=Homo sapiens OX=9606 GN=DPF2 PE=1 SV=2;sp|Q92785-2|REQU_HUMAN Isoform 2 of Zinc finger protein ubi-d4 OS=Homo sapiens OX=9606 GN=DPF2	1	4868	0	NaN	NaN	NaN	NaN	NaN	NaN	NaN	NaN	NaN	NaN	NaN	NaN	NaN	NaN	NaN	NaN	NaN
UID23495	S	3	___1	NAPHPDDDDS(0.007)CS(0.993)INSDPEAK	0.992647	1.09e-07	106.12	90.7	106.12	-0.13391	121810000	409	NaN	NaN	NaN	NaN	NaN	0.992647	NaN	0.880349	NaN	Q92870;Q92870-4;Q92870-2	409;410;388	Q92870;Q92870-2	Q92870	Amyloid beta A4 precursor protein-binding family B member 2	APBB2	LKLRNAPHPDDDDSCSINSDPEAKCFAVRSL	sp|Q92870|APBB2_HUMAN Amyloid-beta A4 precursor protein-binding family B member 2 OS=Homo sapiens OX=9606 GN=APBB2 PE=1 SV=3;sp|Q92870-4|APBB2_HUMAN Isoform 4 of Amyloid-beta A4 precursor protein-binding family B member 2 OS=Homo sapiens OX=9606 GN=APBB2;s	1	4890;4891	0	NaN	NaN	NaN	NaN	NaN	NaN	NaN	NaN	NaN	NaN	NaN	NaN	NaN	NaN	NaN	NaN	NaN
UID23502	S	3	___1	YELQQLEGS(0.776)S(0.224)DR	0.77581	0.00182137	69.431	47.199	69.431	0.49052	47288000	331	NaN	NaN	NaN	NaN	0	0.77581	NaN	NaN	NaN	Q92878-3;Q92878;Q92878-2	331;470;476	Q92878-3	Q92878-3	DNA repair protein RAD50	RAD50	NELKNVKYELQQLEGSSDRILELDQELIKAE	sp|Q92878-3|RAD50_HUMAN Isoform 3 of DNA repair protein RAD50 OS=Homo sapiens OX=9606 GN=RAD50;sp|Q92878|RAD50_HUMAN DNA repair protein RAD50 OS=Homo sapiens OX=9606 GN=RAD50 PE=1 SV=1;sp|Q92878-2|RAD50_HUMAN Isoform 2 of DNA repair protein RAD50 OS=Homo s	1	4892	0	NaN	NaN	NaN	NaN	NaN	NaN	NaN	NaN	NaN	NaN	NaN	NaN	NaN	NaN	NaN	NaN	NaN
UID23554	S	3	___1	GLGPS(1)PAGDGPSGSGK	1	3.59e-21	125.97	100.04	112.82	0.14444	194810000	25	0.982721	0.999996	0.999987	NaN	0.999999	NaN	1	NaN	0.999993	Q92934	25	Q92934	Q92934	Bcl2-associated agonist of cell death	BAD	SEQEDSSSAERGLGPSPAGDGPSGSGKHHRQ	sp|Q92934|BAD_HUMAN Bcl2-associated agonist of cell death OS=Homo sapiens OX=9606 GN=BAD PE=1 SV=3	1	4908	0	NaN	NaN	NaN	NaN	NaN	NaN	NaN	NaN	NaN	NaN	NaN	NaN	NaN	NaN	NaN	NaN	NaN
UID23574	S	3	___1	ERPS(0.673)S(0.327)AIYPSDSFR	0.672829	5.6e-05	94.856	78.104	94.856	0.24359	704170000	94	NaN	NaN	NaN	NaN	0.672829	NaN	NaN	NaN	NaN	Q92974-3;Q92974-2;Q92974	94;121;121	Q92974-3	Q92974-3	Rho guanine nucleotide exchange factor 2	ARHGEF2	QSVSLRSKTTIRERPSSAIYPSDSFRQSLLG	sp|Q92974-3|ARHG2_HUMAN Isoform 3 of Rho guanine nucleotide exchange factor 2 OS=Homo sapiens OX=9606 GN=ARHGEF2;sp|Q92974-2|ARHG2_HUMAN Isoform 2 of Rho guanine nucleotide exchange factor 2 OS=Homo sapiens OX=9606 GN=ARHGEF2;sp|Q92974|ARHG2_HUMAN Rho guan	1	4913	0	NaN	NaN	NaN	NaN	NaN	NaN	NaN	NaN	NaN	NaN	NaN	NaN	NaN	NaN	NaN	NaN	NaN
UID23606	S	3	___1	NGILAIEGT(0.086)GS(0.511)DVDDDMS(0.403)GDEK	0.510825	7.32e-11	79.021	67.766	64.723	0.56005	32572000	1593	NaN	NaN	NaN	NaN	0.447666	0.510825	0.333333	NaN	NaN	Q93008-1;Q93008	1593;1593	Q93008-1	Q93008-1	Probable ubiquitin carboxyl-terminal hydrolase FAF-X	USP9X	IPSIRNGILAIEGTGSDVDDDMSGDEKQDNE	sp|Q93008-1|USP9X_HUMAN Isoform 2 of Probable ubiquitin carboxyl-terminal hydrolase FAF-X OS=Homo sapiens OX=9606 GN=USP9X;sp|Q93008|USP9X_HUMAN Probable ubiquitin carboxyl-terminal hydrolase FAF-X OS=Homo sapiens OX=9606 GN=USP9X PE=1 SV=3	1	4919	0	NaN	NaN	NaN	NaN	NaN	NaN	NaN	NaN	NaN	NaN	NaN	NaN	NaN	NaN	NaN	NaN	NaN
UID23614	S	3	___1	IIGVHQEDELLECLS(0.984)PAT(0.013)S(0.003)R	0.983711	2.87e-56	185.84	167.92	185.84	0.474	141810000	963	0.983711	NaN	NaN	0.979124	0.982516	0	0.375332	0.333333	NaN	Q93009;Q93009-3	963;947	Q93009	Q93009	Ubiquitin carboxyl-terminal hydrolase 7	USP7	KIIGVHQEDELLECLSPATSRTFRIEEIPLD	sp|Q93009|UBP7_HUMAN Ubiquitin carboxyl-terminal hydrolase 7 OS=Homo sapiens OX=9606 GN=USP7 PE=1 SV=2;sp|Q93009-3|UBP7_HUMAN Isoform 3 of Ubiquitin carboxyl-terminal hydrolase 7 OS=Homo sapiens OX=9606 GN=USP7	1	4920	0	NaN	NaN	NaN	NaN	NaN	NaN	NaN	NaN	NaN	NaN	NaN	NaN	NaN	NaN	NaN	NaN	NaN
UID23618	S	4	___1	GPPLPPPPPLPECLT(0.494)IS(0.502)PPVPS(0.003)GPPS(0.001)K	0.501908	0.000137738	57.144	42.216	57.144	0.081956	16124000	276	0.493905	NaN	0.499126	NaN	0.497211	0.501908	NaN	0.485721	NaN	Q93015-2;Q93015	276;254	Q93015-2	Q93015-2	N-acetyltransferase 6	NAT6	PPLPPPPPLPECLTISPPVPSGPPSKSLLET	sp|Q93015-2|NAA80_HUMAN Isoform 2 of N-alpha-acetyltransferase 80 OS=Homo sapiens OX=9606 GN=NAA80;sp|Q93015|NAA80_HUMAN N-alpha-acetyltransferase 80 OS=Homo sapiens OX=9606 GN=NAA80 PE=1 SV=2	1	4921	0	NaN	NaN	NaN	NaN	NaN	NaN	NaN	NaN	NaN	NaN	NaN	NaN	NaN	NaN	NaN	NaN	NaN
UID23685	S	3	___1	EGEDPNKAEELPS(1)EK	1	4.14e-05	106.03	79.59	106.03	0.57141	169600000	370	NaN	NaN	NaN	NaN	1	NaN	0	0	NaN	Q969S3	370	Q969S3	Q969S3	Zinc finger protein 622	ZNF622	DHKEGEDPNKAEELPSEKNLEYDDETMELIL	sp|Q969S3|ZN622_HUMAN Zinc finger protein 622 OS=Homo sapiens OX=9606 GN=ZNF622 PE=1 SV=1	1	4947	0	NaN	NaN	NaN	NaN	NaN	NaN	NaN	NaN	NaN	NaN	NaN	NaN	NaN	NaN	NaN	NaN	NaN
[truncated: 40,025 more rows]
[truncated: 36 more columns]

## Sheet: Table S2B
Table S2B: Proteomics data of CRC35, related to Figures 2, 3, and 4
	Mutational status	BRAF/ KRAS wt	BRAF/ KRAS wt	BRAF/ KRAS wt	BRAF mut	BRAF/ KRAS wt	KRAS mut	KRAS mut	KRAS mut	BRAF mut	BRAF mut	BRAF/ KRAS wt	KRAS mut	KRAS mut	KRAS mut	KRAS mut	BRAF mut	KRAS mut	BRAF mut	BRAF/ KRAS wt	BRAF/ KRAS wt	KRAS mut	KRAS mut	BRAF mut	KRAS mut	BRAF/ KRAS wt	KRAS mut	KRAS mut	BRAF mut	KRAS mut	BRAF/ KRAS wt	KRAS mut	KRAS mut	KRAS mut	KRAS mut
[truncated: 7,914 more rows]
[truncated: 36 more columns]

## Sheet: Table S2C
Table S2C: Results of KEGG pathway analysis, related to Figure 2
[truncated: 73 more rows]

## Sheet: Table S2D
Table S2D: Results of STRING Network Analysis, related to Figure 2
[truncated: 24 more rows]
