# Supplementary material for: Integrative analysis of cancer dependency data and comprehensive phosphoproteomics data revealed the EPHA2-PARD3 axis as a cancer vulnerability in KRAS-mutant colorectal cancer
Source: Royal Society of Chemistry journal article supplement (doi:10.1039/d3mo00042g), 2023-05-16
Supplement: d3mo00042g5.xlsx [file d3mo00042g5.xlsx]

## Sheet: Table S3A
Table S3A: List of protein‒protein pairs with a positive correlation rate (Rho≥0.9) in KRAS-mutant cells										KRAS mut cells	KRAS mut cells	KRAS mut cells	34 CRC cells	34 CRC cells	34 CRC cells
Number	Node1 (, ;interact with) Node2	Node1_Gene	Node1_Uniprot	Node1_Entry	Node1_Protein names	Node2_Gene	Node2_Uniprot	Node2_Entry	Node2_Protein names	Rho①	number of valid value	p-value	Rho②	number of valid value	p-value	Compare correlation [Rho①-Rho②]	Compare correlation [Rho①-Rho②] (Z-Score)	Top10%/ Bottom10%
287169	1041-P02462_CO4A1,X6716.Q9HD23_MRS2	COL4A1	P02462	CO4A1	Collagen alpha-1(IV) chain [Cleaved into: Arresten]	MRS2	Q9HD23	MRS2	Magnesium transporter MRS2 homolog, mitochondrial (MRS2-like protein)	0.904762	8	0.00200828	-0.243956	14	0.400625	1.14872	3.5562	Top10%
666876	2645-P78549_NTH,X5727.Q96MM7_H6ST2	NTHL1	P78549	NTH	Endonuclease III-like protein 1 (hNTH1) (EC 3.2.2.-) (EC 4.2.99.18) (Bifunctional DNA N-glycosylase/DNA-(apurinic or apyrimidinic site) lyase) (DNA glycosylase/AP lyase)	HS6ST2	Q96MM7	H6ST2	Heparan-sulfate 6-O-sulfotransferase 2 (HS6ST-2) (EC 2.8.2.-)	1	5	0	-0.13986	12	0.664633	1.13986	3.51469	Top10%
77167	276-O15054_KDM6B,X5092.Q8WU10_PYRD1	KDM6B	O15054	KDM6B	Lysine-specific demethylase 6B (EC 1.14.11.68) (JmjC domain-containing protein 3) (Jumonji domain-containing protein 3) (Lysine demethylase 6B) ([histone H3]-trimethyl-L-lysine(27) demethylase 6B)	PYROXD1	Q8WU10	PYRD1	Pyridine nucleotide-disulfide oxidoreductase domain-containing protein 1 (EC 1.8.1.-)	1	4	0	-0.0238095	8	0.955374	1.02381	2.97089	Top10%
864036	3791-Q5T4D3_TMTC4,X4727.Q8N4C6_NIN	TMTC4	Q5T4D3	TMTC4	Protein O-mannosyl-transferase TMTC4 (EC 2.4.1.109) (Transmembrane and TPR repeat-containing protein 4)	NIN	Q8N4C6	NIN	Ninein (hNinein) (Glycogen synthase kinase 3 beta-interacting protein) (GSK3B-interacting protein)	1	4	0	-0.020979	12	0.948402	1.02098	2.95762	Top10%
981956	4709-Q8N3F0_MTURN,X4774.Q8N5Y8_PAR16	MTURN	Q8N3F0	MTURN	Maturin (Maturin neural progenitor differentiation regulator protein homolog) (Protein Ells1)	PARP16	Q8N5Y8	PAR16	Protein mono-ADP-ribosyltransferase PARP16 (EC 2.4.2.-) (ADP-ribosyltransferase diphtheria toxin-like 15) (Poly [ADP-ribose] polymerase 16) (PARP-16)	1	4	0	0.0476191	8	0.910849	0.952381	2.63617	Top10%
26575	103-O00212_RHOD,X4918.Q8NEZ3_WDR19	RHOD	O00212	RHOD	Rho-related GTP-binding protein RhoD (Rho-related protein HP1) (RhoHP1)	WDR19	Q8NEZ3	WDR19	WD repeat-containing protein 19 (Intraflagellar transport 144 homolog)	0.928571	7	0.00251947	0.00714286	15	0.979844	0.921429	2.49113	Top10%
107286	378-O43167_ZBT24,X3295.Q14CW9_AT7L3	ZBTB24	O43167	ZBT24	Zinc finger and BTB domain-containing protein 24 (Zinc finger protein 450)	ATXN7L3	Q14CW9	AT7L3	Ataxin-7-like protein 3 (SAGA-associated factor 11 homolog)	0.90303	10	0.000343612	-0.000564653	22	0.99801	0.903595	2.40756	Top10%
107338	378-O43167_ZBT24,X5185.Q8WXI7_MUC16	ZBTB24	O43167	ZBT24	Zinc finger and BTB domain-containing protein 24 (Zinc finger protein 450)	MUC16	Q8WXI7	MUC16	Mucin-16 (MUC-16) (Ovarian cancer-related tumor marker CA125) (CA-125) (Ovarian carcinoma antigen CA125)	1	4	0	0.116667	9	0.765008	0.883333	2.31262	Top10%
539223	2051-P46013_KI67,X4051.Q6P6B1_ERIC5	MKI67	P46013	KI67	Proliferation marker protein Ki-67 (Antigen identified by monoclonal antibody Ki-67) (Antigen KI-67) (Antigen Ki67)	ERICH5	Q6P6B1	ERIC5	Glutamate-rich protein 5	0.936364	11	2.21e-05	0.06917	23	0.753822	0.867194	2.23699	Top10%
107318	378-O43167_ZBT24,X4581.Q8IX15_HOMEZ	ZBTB24	O43167	ZBT24	Zinc finger and BTB domain-containing protein 24 (Zinc finger protein 450)	HOMEZ	Q8IX15	HOMEZ	Homeobox and leucine zipper protein Homez (Homeodomain leucine zipper-containing factor)	0.942857	6	0.00480466	0.0764706	16	0.778341	0.866387	2.23321	Top10%
15608	59-A6ZKI3_RTL8C,X1547.P20042_IF2B	RTL8C	A6ZKI3	RTL8C	Retrotransposon Gag-like protein 8C (Mammalian retrotransposon derived protein 8C)	EIF2S2	P20042	IF2B	Eukaryotic translation initiation factor 2 subunit 2 (Eukaryotic translation initiation factor 2 subunit beta) (eIF-2-beta)	0.901099	13	2.61e-05	0.0446076	22	0.843739	0.856491	2.18684	Top10%
686611	2737-Q01484_ANK2,X4272.Q7L945_ZN627	ANK2	Q01484	ANK2	Ankyrin-2 (ANK-2) (Ankyrin-B) (Brain ankyrin) (Non-erythroid ankyrin)	ZNF627	Q7L945	ZN627	Zinc finger protein 627	0.9	11	0.000159971	0.048419	23	0.826348	0.851581	2.16383	Top10%
981074	4700-Q8N302_AGGF1,X7616.Q9Y251_HPSE	AGGF1	Q8N302	AGGF1	Angiogenic factor with G patch and FHA domains 1 (Angiogenic factor VG5Q) (hVG5Q) (G patch domain-containing protein 7) (Vasculogenesis gene on 5q protein)	HPSE	Q9Y251	HPSE	Heparanase (EC 3.2.1.166) (Endo-glucoronidase) (Heparanase-1) (Hpa1) [Cleaved into: Heparanase 8 kDa subunit; Heparanase 50 kDa subunit]	1	4	0	0.15	9	0.700094	0.85	2.15642	Top10%
1054261	5422-Q96B97_SH3K1,X6003.Q9BR39_JPH2	SH3KBP1	Q96B97	SH3K1	SH3 domain-containing kinase-binding protein 1 (CD2-binding protein 3) (CD2BP3) (Cbl-interacting protein of 85 kDa) (Human Src family kinase-binding protein 1) (HSB-1)	JPH2	Q9BR39	JPH2	Junctophilin-2 (JP-2) (Junctophilin type 2) [Cleaved into: Junctophilin-2 N-terminal fragment (JP2NT)]	0.927273	10	0.000112035	0.0773574	22	0.732221	0.849915	2.15602	Top10%
191486	687-O75460_ERN1,X4063.Q6PCB8_EMB	ERN1	O75460	ERN1	Serine/threonine-protein kinase/endoribonuclease IRE1 (Endoplasmic reticulum-to-nucleus signaling 1) (Inositol-requiring protein 1) (hIRE1p) (Ire1-alpha) (IRE1a) [Includes: Serine/threonine-protein kinase (EC 2.7.11.1); Endoribonuclease (EC 3.1.26.-)]	EMB	Q6PCB8	EMB	Embigin	1	4	0	0.166667	8	0.693239	0.833333	2.07832	Top10%
564489	2156-P49638_TTPA,X2855.Q07654_TFF3	TTPA	P49638	TTPA	Alpha-tocopherol transfer protein (Alpha-TTP)	TFF3	Q07654	TFF3	Trefoil factor 3 (Intestinal trefoil factor) (hITF) (Polypeptide P1.B) (hP1.B)	1	4	0	0.166667	8	0.693239	0.833333	2.07832	Top10%
879415	3900-Q687X5_STEA4,X4422.Q86VE9_SERC5	STEAP4	Q687X5	STEA4	Metalloreductase STEAP4 (EC 1.16.1.9) (Six-transmembrane epithelial antigen of prostate 4) (SixTransMembrane protein of prostate 2) (Tumor necrosis factor, alpha-induced protein 9)	SERINC5	Q86VE9	SERC5	Serine incorporator 5	0.933333	9	0.0002359	0.110423	18	0.662698	0.82291	2.02948	Top10%
806219	3424-Q15649_ZNHI3,X5552.Q96F46_I17RA	ZNHIT3	Q15649	ZNHI3	Zinc finger HIT domain-containing protein 3 (HNF-4a coactivator) (Thyroid hormone receptor interactor 3) (Thyroid receptor-interacting protein 3) (TR-interacting protein 3) (TRIP-3)	IL17RA	Q96F46	I17RA	Interleukin-17 receptor A (IL-17 receptor A) (IL-17RA) (CDw217) (CD antigen CD217)	0.915152	10	0.000204472	0.0961039	21	0.678583	0.819048	2.01138	Top10%
122754	436-O43566_RGS14,X2156.P49638_TTPA	RGS14	O43566	RGS14	Regulator of G-protein signaling 14 (RGS14)	TTPA	P49638	TTPA	Alpha-tocopherol transfer protein (Alpha-TTP)	1	5	0	0.188811	12	0.556737	0.811189	1.97455	Top10%
1066605	5564-Q96FS4_SIPA1,X6407.Q9H211_CDT1	SIPA1	Q96FS4	SIPA1	Signal-induced proliferation-associated protein 1 (Sipa-1) (GTPase-activating protein Spa-1) (p130 SPA-1)	CDT1	Q9H211	CDT1	DNA replication factor Cdt1 (Double parked homolog) (DUP)	0.964286	7	0.000454149	0.17402	17	0.50415	0.790266	1.87651	Top10%
666855	2645-P78549_NTH,X5365.Q969Q5_RAB24	NTHL1	P78549	NTH	Endonuclease III-like protein 1 (hNTH1) (EC 3.2.2.-) (EC 4.2.99.18) (Bifunctional DNA N-glycosylase/DNA-(apurinic or apyrimidinic site) lyase) (DNA glycosylase/AP lyase)	RAB24	Q969Q5	RAB24	Ras-related protein Rab-24	0.904762	8	0.00200828	0.116615	18	0.644932	0.788147	1.86658	Top10%
883900	3936-Q6DN12_MCTP2,X4063.Q6PCB8_EMB	MCTP2	Q6DN12	MCTP2	Multiple C2 and transmembrane domain-containing protein 2	EMB	Q6PCB8	EMB	Embigin	1	4	0	0.214286	8	0.610344	0.785714	1.85518	Top10%
666912	2645-P78549_NTH,X6183.Q9BWW4_SSBP3	NTHL1	P78549	NTH	Endonuclease III-like protein 1 (hNTH1) (EC 3.2.2.-) (EC 4.2.99.18) (Bifunctional DNA N-glycosylase/DNA-(apurinic or apyrimidinic site) lyase) (DNA glycosylase/AP lyase)	SSBP3	Q9BWW4	SSBP3	Single-stranded DNA-binding protein 3 (Sequence-specific single-stranded-DNA-binding protein)	0.942857	6	0.00480466	0.161765	16	0.549483	0.781092	1.83352	Top10%
312528	1134-P06748_NPM,X1412.P15313_VATB1	NPM1	P06748	NPM	Nucleophosmin (NPM) (Nucleolar phosphoprotein B23) (Nucleolar protein NO38) (Numatrin)	ATP6V1B1	P15313	VATB1	V-type proton ATPase subunit B, kidney isoform (V-ATPase subunit B 1) (Endomembrane proton pump 58 kDa subunit) (Vacuolar proton pump subunit B 1)	0.902098	12	6e-05	0.122051	26	0.552538	0.780047	1.82862	Top10%
864069	3791-Q5T4D3_TMTC4,X5765.Q96PE3_INP4A	TMTC4	Q5T4D3	TMTC4	Protein O-mannosyl-transferase TMTC4 (EC 2.4.1.109) (Transmembrane and TPR repeat-containing protein 4)	INPP4A	Q96PE3	INP4A	Inositol polyphosphate-4-phosphatase type I A (Inositol polyphosphate 4-phosphatase type I) (Type I inositol 3,4-bisphosphate 4-phosphatase) (EC 3.1.3.66)	0.9	11	0.000159971	0.121541	23	0.580646	0.778459	1.82118	Top10%
72386	258-O14974_MYPT1,X2694.P98095_FBLN2	PPP1R12A	O14974	MYPT1	Protein phosphatase 1 regulatory subunit 12A (Myosin phosphatase-targeting subunit 1) (Myosin phosphatase target subunit 1) (Protein phosphatase myosin-binding subunit)	FBLN2	P98095	FBLN2	Fibulin-2 (FIBL-2)	0.915152	10	0.000204472	0.138961	21	0.548018	0.77619	1.81055	Top10%
981979	4709-Q8N3F0_MTURN,X6168.Q9BWD1_THIC	MTURN	Q8N3F0	MTURN	Maturin (Maturin neural progenitor differentiation regulator protein homolog) (Protein Ells1)	ACAT2	Q9BWD1	THIC	Acetyl-CoA acetyltransferase, cytosolic (EC 2.3.1.9) (Acetyl-CoA transferase-like protein) (Cytosolic acetoacetyl-CoA thiolase)	0.915152	10	0.000204472	0.138961	21	0.548018	0.776191	1.81055	Top10%
383707	1405-P15153_RAC2,X6003.Q9BR39_JPH2	RAC2	P15153	RAC2	Ras-related C3 botulinum toxin substrate 2 (GX) (Small G protein) (p21-Rac2)	JPH2	Q9BR39	JPH2	Junctophilin-2 (JP-2) (Junctophilin type 2) [Cleaved into: Junctophilin-2 N-terminal fragment (JP2NT)]	1	4	0	0.236364	11	0.484091	0.763636	1.75172	Top10%
288951	1051-P02753_RET4,X4434.Q86VV8_RTTN	RBP4	P02753	RET4	Retinol-binding protein 4 (Plasma retinol-binding protein) (PRBP) (RBP) [Cleaved into: Plasma retinol-binding protein(1-182); Plasma retinol-binding protein(1-181); Plasma retinol-binding protein(1-179); Plasma retinol-binding protein(1-176)]	RTTN	Q86VV8	RTTN	Rotatin	0.90303	10	0.000343612	0.141728	22	0.529253	0.761302	1.74079	Top10%
720920	2921-Q12767_TMM94,X7142.Q9P0M2_AKA7G	TMEM94	Q12767	TMM94	Transmembrane protein 94	AKAP7	Q9P0M2	AKA7G	A-kinase anchor protein 7 isoform gamma (AKAP-7 isoform gamma) (A-kinase anchor protein 18 kDa) (AKAP 18) (Protein kinase A-anchoring protein 7 isoform gamma) (PRKA7 isoform gamma)	0.939394	10	5.48e-05	0.184641	22	0.410735	0.754753	1.71009	Top10%
845291	3666-Q53RE8_ANR39,X4968.Q8TAA5_GRPE2	ANKRD39	Q53RE8	ANR39	Ankyrin repeat domain-containing protein 39	GRPEL2	Q8TAA5	GRPE2	GrpE protein homolog 2, mitochondrial (Mt-GrpE#2)	0.909091	12	4.19e-05	0.162055	23	0.460057	0.747036	1.67393	Top10%
981037	4700-Q8N302_AGGF1,X5728.Q96MN5_TEAN2	AGGF1	Q8N302	AGGF1	Angiogenic factor with G patch and FHA domains 1 (Angiogenic factor VG5Q) (hVG5Q) (G patch domain-containing protein 7) (Vasculogenesis gene on 5q protein)	TCEANC2	Q96MN5	TEAN2	Transcription elongation factor A N-terminal and central domain-containing protein 2	0.942857	6	0.00480466	0.2	11	0.555445	0.742857	1.65435	Top10%
158789	565-O60658_PDE8A,X3242.Q14623_IHH	PDE8A	O60658	PDE8A	High affinity cAMP-specific and IBMX-insensitive 3',5'-cyclic phosphodiesterase 8A (EC 3.1.4.53)	IHH	Q14623	IHH	Indian hedgehog protein (IHH) (EC 3.1.-.-) (HHG-2) [Cleaved into: Indian hedgehog protein N-product]	0.90303	10	0.000343612	0.165443	22	0.461856	0.737587	1.62966	Top10%
601931	2339-P53667_LIMK1,X5552.Q96F46_I17RA	LIMK1	P53667	LIMK1	LIM domain kinase 1 (LIMK-1) (EC 2.7.11.1)	IL17RA	Q96F46	I17RA	Interleukin-17 receptor A (IL-17 receptor A) (IL-17RA) (CDw217) (CD antigen CD217)	0.933333	9	0.0002359	0.196992	20	0.405152	0.736341	1.62382	Top10%
959787	4515-Q8IV08_PLD3,X5750.Q96NL8_CH037	PLD3	Q8IV08	PLD3	5'-3' exonuclease PLD3 (EC 3.1.16.1) (Choline phosphatase 3) (HindIII K4L homolog) (Hu-K4) (Phosphatidylcholine-hydrolyzing phospholipase D3) (Phospholipase D3) (PLD 3)	CFAP418	Q96NL8	CH037	Cilia- and flagella-associated protein 418	0.906593	13	1.93e-05	0.170435	24	0.425895	0.736159	1.62296	Top10%
727864	2963-Q12972_PP1R8,X4931.Q8NFH3_NUP43	PPP1R8	Q12972	PP1R8	Nuclear inhibitor of protein phosphatase 1 (NIPP-1) (Protein phosphatase 1 regulatory inhibitor subunit 8) [Includes: Activator of RNA decay (EC 3.1.4.-) (ARD-1)]	NUP43	Q8NFH3	NUP43	Nucleoporin Nup43 (Nup107-160 subcomplex subunit Nup43) (p42)	0.915377	18	1.01e-07	0.180749	34	0.306321	0.734628	1.61579	Top10%
895247	4018-Q6P1A2_MBOA5,X6552.Q9H7U1_CCSE2	LPCAT3	Q6P1A2	MBOA5	Lysophospholipid acyltransferase 5 (LPLAT 5) (EC 2.3.1.-) (1-acylglycerophosphocholine O-acyltransferase) (EC 2.3.1.23) (1-acylglycerophosphoethanolamine O-acyltransferase) (EC 2.3.1.n7) (1-acylglycerophosphoserine O-acyltransferase) (EC 2.3.1.n6) (Lysophosphatidylcholine acyltransferase) (LPCAT) (Lyso-PC acyltransferase) (Lysophosphatidylcholine acyltransferase 3) (Lyso-PC acyltransferase 3) (Ly…	CCSER2	Q9H7U1	CCSE2	Serine-rich coiled-coil domain-containing protein 2 (Coiled-coil serine-rich protein 2) (Protein GCAP14 homolog)	0.9	11	0.000159971	0.168421	20	0.477829	0.731579	1.6015	Top10%
296512	1080-P04439_HLAA,X7343.Q9UHV7_MED13	HLA-A	P04439	HLAA	HLA class I histocompatibility antigen, A alpha chain (Human leukocyte antigen A) (HLA-A)	MED13	Q9UHV7	MED13	Mediator of RNA polymerase II transcription subunit 13 (Activator-recruited cofactor 250 kDa component) (ARC250) (Mediator complex subunit 13) (Thyroid hormone receptor-associated protein 1) (Thyroid hormone receptor-associated protein complex 240 kDa component) (Trap240) (Vitamin D3 receptor-interacting protein complex component DRIP250) (DRIP250)	0.967033	13	7.06e-08	0.236239	26	0.245283	0.730794	1.59782	Top10%
418898	1542-P19835_CEL,X2156.P49638_TTPA	CEL	P19835	CEL	Bile salt-activated lipase (BAL) (EC 3.1.1.13) (EC 3.1.1.3) (EC 3.1.1.6) (Bile salt-stimulated lipase) (BSSL) (Bucelipase) (Carboxyl ester lipase) (Cholesterol esterase) (Pancreatic lysophospholipase) (Sterol esterase)	TTPA	P49638	TTPA	Alpha-tocopherol transfer protein (Alpha-TTP)	0.90303	10	0.000343612	0.179221	21	0.436965	0.72381	1.5651	Top10%
172930	620-O75116_ROCK2,X6552.Q9H7U1_CCSE2	ROCK2	O75116	ROCK2	Rho-associated protein kinase 2 (EC 2.7.11.1) (Rho kinase 2) (Rho-associated, coiled-coil-containing protein kinase 2) (Rho-associated, coiled-coil-containing protein kinase II) (ROCK-II) (p164 ROCK-2)	CCSER2	Q9H7U1	CCSE2	Serine-rich coiled-coil domain-containing protein 2 (Coiled-coil serine-rich protein 2) (Protein GCAP14 homolog)	0.927273	11	3.97e-05	0.210526	20	0.37297	0.716746	1.532	Top10%
1163723	7351-Q9UI10_EI2BD,X7459.Q9UL33_TPC2L	EIF2B4	Q9UI10	EI2BD	Translation initiation factor eIF-2B subunit delta (eIF-2B GDP-GTP exchange factor subunit delta)	TRAPPC2L	Q9UL33	TPC2L	Trafficking protein particle complex subunit 2-like protein	0.916084	12	2.84e-05	0.201581	22	0.368337	0.714503	1.52149	Top10%
1102661	6003-Q9BR39_JPH2,X7508.Q9ULW8_PADI3	JPH2	Q9BR39	JPH2	Junctophilin-2 (JP-2) (Junctophilin type 2) [Cleaved into: Junctophilin-2 N-terminal fragment (JP2NT)]	PADI3	Q9ULW8	PADI3	Protein-arginine deiminase type-3 (EC 3.5.3.15) (Peptidylarginine deiminase III) (Protein-arginine deiminase type III)	0.942857	6	0.00480466	0.232143	15	0.405099	0.710714	1.50373	Top10%
930977	4289-Q7Z309_F122B,X6003.Q9BR39_JPH2	PABIR2	Q7Z309	F122B	PABIR family member 2	JPH2	Q9BR39	JPH2	Junctophilin-2 (JP-2) (Junctophilin type 2) [Cleaved into: Junctophilin-2 N-terminal fragment (JP2NT)]	0.90303	10	0.000343612	0.20384	22	0.362881	0.699191	1.44973	Top10%
728848	2968-Q12982_BNIP2,X7645.Q9Y2D9_ZN652	BNIP2	Q12982	BNIP2	BCL2/adenovirus E1B 19 kDa protein-interacting protein 2	ZNF652	Q9Y2D9	ZN652	Zinc finger protein 652	0.909091	12	4.19e-05	0.210474	23	0.335063	0.698617	1.44704	Top10%
324733	1178-P08138_TNR16,X2918.Q11201_SIA4A	NGFR	P08138	TNR16	Tumor necrosis factor receptor superfamily member 16 (Gp80-LNGFR) (Low affinity neurotrophin receptor p75NTR) (Low-affinity nerve growth factor receptor) (NGF receptor) (p75 ICD) (CD antigen CD271)	ST3GAL1	Q11201	SIA4A	CMP-N-acetylneuraminate-beta-galactosamide-alpha-2,3-sialyltransferase 1 (Alpha 2,3-ST 1) (Beta-galactoside alpha-2,3-sialyltransferase 1) (EC 2.4.3.4) (Gal-NAc6S) (Gal-beta-1,3-GalNAc-alpha-2,3-sialyltransferase) (Monosialoganglioside sialyltransferase) (EC 2.4.3.2) (SIATFL) (ST3Gal I) (ST3GalI) (ST3GalA.1) (ST3O) (Sialyltransferase 4A) (SIAT4-A)	0.928571	8	0.000862968	0.230075	20	0.329138	0.698496	1.44648	Top10%
492616	1845-P32926_DSG3,X7423.Q9UKA9_PTBP2	DSG3	P32926	DSG3	Desmoglein-3 (130 kDa pemphigus vulgaris antigen) (PVA) (Cadherin family member 6)	PTBP2	Q9UKA9	PTBP2	Polypyrimidine tract-binding protein 2 (Neural polypyrimidine tract-binding protein) (Neurally-enriched homolog of PTB) (PTB-like protein)	0.918182	11	6.66e-05	0.221053	20	0.348974	0.697129	1.44007	Top10%
772288	3213-Q14314_FGL2,X3473.Q16533_SNPC1	FGL2	Q14314	FGL2	Fibroleukin (Fibrinogen-like protein 2) (pT49)	SNAPC1	Q16533	SNPC1	snRNA-activating protein complex subunit 1 (SNAPc subunit 1) (Proximal sequence element-binding transcription factor subunit gamma) (PSE-binding factor subunit gamma) (PTF subunit gamma) (Small nuclear RNA-activating complex polypeptide 1) (snRNA-activating protein complex 43 kDa subunit) (SNAPc 43 kDa subunit)	0.927273	10	0.000112035	0.230943	22	0.301112	0.69633	1.43633	Top10%
1154933	7032-Q9NXG6_P4HTM,X7690.Q9Y2U8_MAN1	P4HTM	Q9NXG6	P4HTM	Transmembrane prolyl 4-hydroxylase (P4H-TM) (EC 1.14.11.29) (Hypoxia-inducible factor prolyl hydroxylase 4) (HIF-PH4) (HIF-prolyl hydroxylase 4) (HPH-4)	LEMD3	Q9Y2U8	MAN1	Inner nuclear membrane protein Man1 (LEM domain-containing protein 3)	0.902098	12	6e-05	0.219368	23	0.31456	0.68273	1.3726	Top10%
666992	2645-P78549_NTH,X7576.Q9UPT6_JIP3	NTHL1	P78549	NTH	Endonuclease III-like protein 1 (hNTH1) (EC 3.2.2.-) (EC 4.2.99.18) (Bifunctional DNA N-glycosylase/DNA-(apurinic or apyrimidinic site) lyase) (DNA glycosylase/AP lyase)	MAPK8IP3	Q9UPT6	JIP3	C-Jun-amino-terminal kinase-interacting protein 3 (JIP-3) (JNK-interacting protein 3) (JNK MAP kinase scaffold protein 3) (Mitogen-activated protein kinase 8-interacting protein 3)	1	4	0	0.318182	11	0.340298	0.681818	1.36833	Top10%
622445	2441-P57105_SYJ2B,X2694.P98095_FBLN2	SYNJ2BP	P57105	SYJ2B	Synaptojanin-2-binding protein (Mitochondrial outer membrane protein 25)	FBLN2	P98095	FBLN2	Fibulin-2 (FIBL-2)	0.915152	10	0.000204472	0.233766	21	0.307787	0.681385	1.3663	Top10%
375502	1372-P13994_CC130,X6552.Q9H7U1_CCSE2	YJU2B	P13994	CC130	Probable splicing factor YJU2B (Coiled-coil domain-containing protein 130)	CCSER2	Q9H7U1	CCSE2	Serine-rich coiled-coil domain-containing protein 2 (Coiled-coil serine-rich protein 2) (Protein GCAP14 homolog)	0.928571	7	0.00251947	0.252747	13	0.404774	0.675824	1.34024
49340	184-O14494_PLPP1,X848.O94972_TRI37	PLPP1	O14494	PLPP1	Phospholipid phosphatase 1 (EC 3.1.3.-) (EC 3.1.3.106) (EC 3.1.3.4) (EC 3.1.3.81) (Lipid phosphate phosphohydrolase 1) (PAP2-alpha) (Phosphatidate phosphohydrolase type 2a) (Phosphatidic acid phosphatase 2a) (PAP-2a) (PAP2a)	TRIM37	O94972	TRI37	E3 ubiquitin-protein ligase TRIM37 (EC 2.3.2.27) (Mulibrey nanism protein) (RING-type E3 ubiquitin transferase TRIM37) (Tripartite motif-containing protein 37)	1	5	0	0.32967	13	0.271335	0.67033	1.31449
192765	693-O75478_TAD2A,X6766.Q9NPQ8_RIC8A	TADA2A	O75478	TAD2A	Transcriptional adapter 2-alpha (Transcriptional adapter 2-like) (ADA2-like protein)	RIC8A	Q9NPQ8	RIC8A	Synembryn-A (Protein Ric-8A)	0.936364	11	2.21e-05	0.266798	23	0.218464	0.669565	1.31091
911107	4139-Q6UXH1_CREL2,X5433.Q96BN2_TADA1	CRELD2	Q6UXH1	CREL2	Protein disulfide isomerase CRELD2 (EC 5.3.4.1) (Cysteine-rich with EGF-like domain protein 2)	TADA1	Q96BN2	TADA1	Transcriptional adapter 1 (SPT3-associated factor 42) (STAF42) (Transcriptional adapter 1-like protein)	0.934066	13	3e-06	0.268696	24	0.204239	0.66537	1.29125
864079	3791-Q5T4D3_TMTC4,X6081.Q9BTV4_TMM43	TMTC4	Q5T4D3	TMTC4	Protein O-mannosyl-transferase TMTC4 (EC 2.4.1.109) (Transmembrane and TPR repeat-containing protein 4)	TMEM43	Q9BTV4	TMM43	Transmembrane protein 43 (Protein LUMA)	0.927273	11	3.97e-05	0.26581	23	0.220239	0.661462	1.27294
959666	4514-Q8IV03_LUR1L,X5695.Q96KN4_LRAT1	LURAP1L	Q8IV03	LUR1L	Leucine rich adaptor protein 1-like	LRATD1	Q96KN4	LRAT1	Protein LRATD1 (LRAT domain-containing 1) (Neurologic sensory protein 1) (NSE1) (Protein FAM84A)	0.93007	12	1.17e-05	0.272308	25	0.187878	0.657762	1.2556
383703	1405-P15153_RAC2,X5931.Q99741_CDC6	RAC2	P15153	RAC2	Ras-related C3 botulinum toxin substrate 2 (GX) (Small G protein) (p21-Rac2)	CDC6	Q99741	CDC6	Cell division control protein 6 homolog (CDC6-related protein) (Cdc18-related protein) (HsCdc18) (p62(cdc6)) (HsCDC6)	0.916084	12	2.84e-05	0.261858	23	0.227435	0.654226	1.23903
192772	693-O75478_TAD2A,X6981.Q9NWF9_RN216	TADA2A	O75478	TAD2A	Transcriptional adapter 2-alpha (Transcriptional adapter 2-like) (ADA2-like protein)	RNF216	Q9NWF9	RN216	E3 ubiquitin-protein ligase RNF216 (EC 2.3.2.27) (RING finger protein 216) (RING-type E3 ubiquitin transferase RNF216) (Triad domain-containing protein 3) (Ubiquitin-conjugating enzyme 7-interacting protein 1) (Zinc finger protein inhibiting NF-kappa-B)	0.918182	11	6.66e-05	0.264822	23	0.222023	0.65336	1.23497
1049	5-A0AVI4_TM129,X1788.P30307_MPIP3	TMEM129	A0AVI4	TM129	E3 ubiquitin-protein ligase TM129 (EC 2.3.2.27) (RING-type E3 ubiquitin transferase TM129)	CDC25C	P30307	MPIP3	M-phase inducer phosphatase 3 (EC 3.1.3.48) (Dual specificity phosphatase Cdc25C)	0.917582	13	9.91e-06	0.264348	24	0.211939	0.653235	1.23439
1063750	5531-Q96EQ0_SGTB,X6678.Q9HC44_GPBL1	SGTB	Q96EQ0	SGTB	Small glutamine-rich tetratricopeptide repeat-containing protein beta (Beta-SGT) (Small glutamine-rich protein with tetratricopeptide repeats 2)	GPBP1L1	Q9HC44	GPBL1	Vasculin-like protein 1 (GC-rich promoter-binding protein 1-like 1)	0.942857	6	0.00480466	0.292857	15	0.289472	0.65	1.21923
447038	1654-P24557_THAS,X2921.Q12767_TMM94	TBXAS1	P24557	THAS	Thromboxane-A synthase (TXA synthase) (TXS) (EC 5.3.99.5) (Cytochrome P450 5A1) (Hydroperoxy icosatetraenoate dehydratase) (EC 4.2.1.152)	TMEM94	Q12767	TMM94	Transmembrane protein 94	1	4	0	0.35	9	0.35582	0.65	1.21923
564604	2156-P49638_TTPA,X7473.Q9ULD9_ZN608	TTPA	P49638	TTPA	Alpha-tocopherol transfer protein (Alpha-TTP)	ZNF608	Q9ULD9	ZN608	Zinc finger protein 608 (Renal carcinoma antigen NY-REN-36)	0.942857	6	0.00480466	0.293706	12	0.354148	0.649151	1.21525
499872	1876-P35237_SPB6,X5519.Q96EF9_ZHX1R	SERPINB6	P35237	SPB6	Serpin B6 (Cytoplasmic antiproteinase) (CAP) (Peptidase inhibitor 6) (PI-6) (Placental thrombin inhibitor)	ZHX1-C8orf76	Q96EF9	ZHX1R	Zinc fingers and homeoboxes protein 1, isoform 2 (ZHX1-C8orf76 readthrough transcript protein)	0.917582	13	9.91e-06	0.270769	25	0.190484	0.646813	1.20429
432989	1601-P22102_PUR2,X4063.Q6PCB8_EMB	GART	P22102	PUR2	Trifunctional purine biosynthetic protein adenosine-3 [Includes: Phosphoribosylamine--glycine ligase (EC 6.3.4.13) (Glycinamide ribonucleotide synthetase) (GARS) (Phosphoribosylglycinamide synthetase); Phosphoribosylformylglycinamidine cyclo-ligase (EC 6.3.3.1) (AIR synthase) (AIRS) (Phosphoribosyl-aminoimidazole synthetase); Phosphoribosylglycinamide formyltransferase (EC 2.1.2.2) (5'-phosphorib…	EMB	Q6PCB8	EMB	Embigin	0.915152	10	0.000204472	0.285714	21	0.209295	0.629437	1.12287
886664	3957-Q6ICB0_DESI1,X4709.Q8N3F0_MTURN	DESI1	Q6ICB0	DESI1	Desumoylating isopeptidase 1 (DeSI-1) (EC 3.4.-.-) (PPPDE peptidase domain-containing protein 2) (Polyubiquitinated substrate transporter) (POST)	MTURN	Q8N3F0	MTURN	Maturin (Maturin neural progenitor differentiation regulator protein homolog) (Protein Ells1)	1	5	0	0.370629	12	0.235621	0.629371	1.12256
1053693	5415-Q96B21_TM45B,X6552.Q9H7U1_CCSE2	TMEM45B	Q96B21	TM45B	Transmembrane protein 45B	CCSER2	Q9H7U1	CCSE2	Serine-rich coiled-coil domain-containing protein 2 (Coiled-coil serine-rich protein 2) (Protein GCAP14 homolog)	0.918182	11	6.66e-05	0.290226	20	0.2145	0.627956	1.11593
772319	3213-Q14314_FGL2,X4239.Q7L099_RUFY3	FGL2	Q14314	FGL2	Fibroleukin (Fibrinogen-like protein 2) (pT49)	RUFY3	Q7L099	RUFY3	Protein RUFY3 (RUN and FYVE domain-containing protein 3) (Rap2-interacting protein x) (RIPx) (Single axon-regulated protein) (Singar)	0.927273	10	0.000112035	0.299831	22	0.175203	0.627442	1.11352
183020	657-O75352_MPU1,X3297.Q14CZ7_FAKD3	MPDU1	O75352	MPU1	Mannose-P-dolichol utilization defect 1 protein (Suppressor of Lec15 and Lec35 glycosylation mutation homolog) (SL15)	FASTKD3	Q14CZ7	FAKD3	FAST kinase domain-containing protein 3, mitochondrial	0.916667	9	0.000506619	0.291729	20	0.212026	0.624937	1.10179
77201	276-O15054_KDM6B,X7201.Q9P2N5_RBM27	KDM6B	O15054	KDM6B	Lysine-specific demethylase 6B (EC 1.14.11.68) (JmjC domain-containing protein 3) (Jumonji domain-containing protein 3) (Lysine demethylase 6B) ([histone H3]-trimethyl-L-lysine(27) demethylase 6B)	RBM27	Q9P2N5	RBM27	RNA-binding protein 27 (RNA-binding motif protein 27)	0.915152	10	0.000204472	0.293506	21	0.196593	0.621645	1.08636
107295	378-O43167_ZBT24,X3533.Q17RS7_GEN	ZBTB24	O43167	ZBT24	Zinc finger and BTB domain-containing protein 24 (Zinc finger protein 450)	GEN1	Q17RS7	GEN	Flap endonuclease GEN homolog 1 (EC 3.1.-.-)	0.915152	10	0.000204472	0.295313	22	0.182113	0.619838	1.07789
229928	830-O94901_SUN1,X4806.Q8N961_ABTB2	SUN1	O94901	SUN1	SUN domain-containing protein 1 (Protein unc-84 homolog A) (Sad1/unc-84 protein-like 1)	ABTB2	Q8N961	ABTB2	Ankyrin repeat and BTB/POZ domain-containing protein 2	0.927273	10	0.000112035	0.31039	21	0.170877	0.616883	1.06404
882015	3921-Q69YN2_C19L1,X4617.Q8IY92_SLX4	CWF19L1	Q69YN2	C19L1	CWF19-like protein 1 (C19L1)	SLX4	Q8IY92	SLX4	Structure-specific endonuclease subunit SLX4 (BTB/POZ domain-containing protein 12)	0.903297	14	9.56e-06	0.286809	28	0.13894	0.616488	1.06219
364835	1328-P12268_IMDH2,X7576.Q9UPT6_JIP3	IMPDH2	P12268	IMDH2	Inosine-5'-monophosphate dehydrogenase 2 (IMP dehydrogenase 2) (IMPD 2) (IMPDH 2) (EC 1.1.1.205) (Inosine-5'-monophosphate dehydrogenase type II) (IMP dehydrogenase II) (IMPDH-II)	MAPK8IP3	Q9UPT6	JIP3	C-Jun-amino-terminal kinase-interacting protein 3 (JIP-3) (JNK-interacting protein 3) (JNK MAP kinase scaffold protein 3) (Mitogen-activated protein kinase 8-interacting protein 3)	0.902098	12	6e-05	0.294466	23	0.172591	0.607631	1.02069
87377	310-O15229_KMO,X2737.Q01484_ANK2	KMO	O15229	KMO	Kynurenine 3-monooxygenase (EC 1.14.13.9) (Kynurenine 3-hydroxylase)	ANK2	Q01484	ANK2	Ankyrin-2 (ANK-2) (Ankyrin-B) (Brain ankyrin) (Non-erythroid ankyrin)	0.90303	10	0.000343612	0.300752	20	0.19758	0.602278	0.995607
1066633	5564-Q96FS4_SIPA1,X7036.Q9NXK8_FXL12	SIPA1	Q96FS4	SIPA1	Signal-induced proliferation-associated protein 1 (Sipa-1) (GTPase-activating protein Spa-1) (p130 SPA-1)	FBXL12	Q9NXK8	FXL12	F-box/LRR-repeat protein 12 (F-box and leucine-rich repeat protein 12) (F-box protein FBL12)	0.928571	7	0.00251947	0.327273	11	0.325895	0.601299	0.991016
629299	2478-P61020_RAB5B,X2957.Q12933_TRAF2	RAB5B	P61020	RAB5B	Ras-related protein Rab-5B (EC 3.6.5.2)	TRAF2	Q12933	TRAF2	TNF receptor-associated factor 2 (EC 2.3.2.27) (E3 ubiquitin-protein ligase TRAF2) (RING-type E3 ubiquitin transferase TRAF2) (Tumor necrosis factor type 2 receptor-associated protein 3)	0.913313	18	1.22e-07	0.314286	34	0.0702619	0.599027	0.980371
127876	456-O43676_NDUB3,X2645.P78549_NTH	NDUFB3	O43676	NDUB3	NADH dehydrogenase [ubiquinone] 1 beta subcomplex subunit 3 (Complex I-B12) (CI-B12) (NADH-ubiquinone oxidoreductase B12 subunit)	NTHL1	P78549	NTH	Endonuclease III-like protein 1 (hNTH1) (EC 3.2.2.-) (EC 4.2.99.18) (Bifunctional DNA N-glycosylase/DNA-(apurinic or apyrimidinic site) lyase) (DNA glycosylase/AP lyase)	0.927273	10	0.000112035	0.331451	22	0.131845	0.595822	0.96535
476398	1777-P30050_RL12,X5433.Q96BN2_TADA1	RPL12	P30050	RL12	60S ribosomal protein L12 (Large ribosomal subunit protein uL11)	TADA1	Q96BN2	TADA1	Transcriptional adapter 1 (SPT3-associated factor 42) (STAF42) (Transcriptional adapter 1-like protein)	0.906593	13	1.93e-05	0.311304	24	0.138676	0.595289	0.962855
762394	3158-Q14004_CDK13,X6003.Q9BR39_JPH2	CDK13	Q14004	CDK13	Cyclin-dependent kinase 13 (EC 2.7.11.22) (EC 2.7.11.23) (CDC2-related protein kinase 5) (Cell division cycle 2-like protein kinase 5) (Cell division protein kinase 13) (hCDK13) (Cholinesterase-related cell division controller)	JPH2	Q9BR39	JPH2	Junctophilin-2 (JP-2) (Junctophilin type 2) [Cleaved into: Junctophilin-2 N-terminal fragment (JP2NT)]	0.915152	10	0.000204472	0.321287	22	0.144843	0.593864	0.956178
1029111	5146-Q8WVS4_WDR60,X6367.Q9H0R5_GBP3	DYNC2I1	Q8WVS4	WDR60	Cytoplasmic dynein 2 intermediate chain 1 (Dynein 2 intermediate chain 1) (WD repeat-containing protein 60)	GBP3	Q9H0R5	GBP3	Guanylate-binding protein 3 (EC 3.6.5.-) (GTP-binding protein 3) (GBP-3) (Guanine nucleotide-binding protein 3)	0.904762	8	0.00200828	0.311275	17	0.223924	0.593487	0.954413
1112596	6154-Q9BVV7_TIM21,X6797.Q9NQU5_PAK6	TIMM21	Q9BVV7	TIM21	Mitochondrial import inner membrane translocase subunit Tim21 (TIM21-like protein, mitochondrial)	PAK6	Q9NQU5	PAK6	Serine/threonine-protein kinase PAK 6 (EC 2.7.11.1) (PAK-5) (p21-activated kinase 6) (PAK-6)	0.963636	11	1.85e-06	0.372174	24	0.0733081	0.591463	0.944924
296386	1080-P04439_HLAA,X3640.Q53ET0_CRTC2	HLA-A	P04439	HLAA	HLA class I histocompatibility antigen, A alpha chain (Human leukocyte antigen A) (HLA-A)	CRTC2	Q53ET0	CRTC2	CREB-regulated transcription coactivator 2 (Transducer of regulated cAMP response element-binding protein 2) (TORC-2) (Transducer of CREB protein 2)	0.906593	13	1.93e-05	0.318291	26	0.113039	0.588303	0.930118
479557	1790-P30414_NKTR,X4518.Q8IV48_ERI1	NKTR	P30414	NKTR	NK-tumor recognition protein (NK-TR protein) (Natural-killer cells cyclophilin-related protein) (Peptidyl-prolyl cis-trans isomerase NKTR) (PPIase) (EC 5.2.1.8) (Rotamase)	ERI1	Q8IV48	ERI1	3'-5' exoribonuclease 1 (EC 3.1.-.-) (3'-5' exonuclease ERI1) (Eri-1 homolog) (Histone mRNA 3'-end-specific exoribonuclease) (Histone mRNA 3'-exonuclease 1) (Protein 3'hExo) (HEXO)	0.913313	18	1.22e-07	0.32712	34	0.0589721	0.586193	0.92023
941019	4368-Q86SQ7_SDCG8,X6807.Q9NR09_BIRC6	SDCCAG8	Q86SQ7	SDCG8	Serologically defined colon cancer antigen 8 (Antigen NY-CO-8) (Centrosomal colon cancer autoantigen protein) (hCCCAP)	BIRC6	Q9NR09	BIRC6	Baculoviral IAP repeat-containing protein 6 (EC 2.3.2.27) (BIR repeat-containing ubiquitin-conjugating enzyme) (BRUCE) (RING-type E3 ubiquitin transferase BIRC6) (Ubiquitin-conjugating BIR domain enzyme apollon) (APOLLON)	0.905882	16	1.36e-06	0.319902	27	0.103805	0.58598	0.919234
709161	2855-Q07654_TFF3,X4900.Q8NE62_CHDH	TFF3	Q07654	TFF3	Trefoil factor 3 (Intestinal trefoil factor) (hITF) (Polypeptide P1.B) (hP1.B)	CHDH	Q8NE62	CHDH	Choline dehydrogenase, mitochondrial (CDH) (CHD) (EC 1.1.99.1)	0.918182	11	6.66e-05	0.332331	20	0.152259	0.585851	0.918629
314405	1140-P07108_ACBP,X2645.P78549_NTH	DBI	P07108	ACBP	Acyl-CoA-binding protein (ACBP) (Diazepam-binding inhibitor) (DBI) (Endozepine) (EP)	NTHL1	P78549	NTH	Endonuclease III-like protein 1 (hNTH1) (EC 3.2.2.-) (EC 4.2.99.18) (Bifunctional DNA N-glycosylase/DNA-(apurinic or apyrimidinic site) lyase) (DNA glycosylase/AP lyase)	0.939394	10	5.48e-05	0.355167	22	0.104797	0.584227	0.91102
704135	2830-Q05DH4_F16A1,X5752.Q96NT1_NP1L5	FHIP1A	Q05DH4	F16A1	FHF complex subunit HOOK interacting protein 1A (FHIP1A) (FTS and Hook-interacting protein like) (FHIP-L)	NAP1L5	Q96NT1	NP1L5	Nucleosome assembly protein 1-like 5 (Down-regulated in liver malignancy)	0.911765	16	8.82e-07	0.334274	31	0.0660695	0.577491	0.879452
914145	4162-Q6YP21_KAT3,X5001.Q8TBK2_SETD6	KYAT3	Q6YP21	KAT3	Kynurenine--oxoglutarate transaminase 3 (EC 2.6.1.7) (Cysteine-S-conjugate beta-lyase 2) (EC 4.4.1.13) (Kynurenine aminotransferase 3) (Kynurenine aminotransferase III) (KATIII) (Kynurenine--glyoxylate transaminase) (EC 2.6.1.63) (Kynurenine--oxoglutarate transaminase III)	SETD6	Q8TBK2	SETD6	N-lysine methyltransferase SETD6 (EC 2.1.1.-) (SET domain-containing protein 6)	0.90303	10	0.000343612	0.330322	22	0.133246	0.572708	0.857043
677679	2694-P98095_FBLN2,X3531.Q17R98_ZN827	FBLN2	P98095	FBLN2	Fibulin-2 (FIBL-2)	ZNF827	Q17R98	ZN827	Zinc finger protein 827	1	4	0	0.428571	8	0.289403	0.571429	0.851046
709266	2855-Q07654_TFF3,X6272.Q9BZR8_B2L14	TFF3	Q07654	TFF3	Trefoil factor 3 (Intestinal trefoil factor) (hITF) (Polypeptide P1.B) (hP1.B)	BCL2L14	Q9BZR8	B2L14	Apoptosis facilitator Bcl-2-like protein 14 (Bcl2-L-14) (Apoptosis regulator Bcl-G)	0.963636	11	1.85e-06	0.392481	20	0.0869559	0.571155	0.849765
864120	3791-Q5T4D3_TMTC4,X7642.Q9Y2D4_EXC6B	TMTC4	Q5T4D3	TMTC4	Protein O-mannosyl-transferase TMTC4 (EC 2.4.1.109) (Transmembrane and TPR repeat-containing protein 4)	EXOC6B	Q9Y2D4	EXC6B	Exocyst complex component 6B (Exocyst complex component Sec15B) (SEC15-like protein 2)	0.909091	11	0.000105593	0.338933	23	0.113636	0.570158	0.845093
209858	754-O75879_GATB,X1178.P08138_TNR16	GATB	O75879	GATB	Glutamyl-tRNA(Gln) amidotransferase subunit B, mitochondrial (Glu-AdT subunit B) (EC 6.3.5.-) (Cytochrome c oxidase assembly factor PET112 homolog)	NGFR	P08138	TNR16	Tumor necrosis factor receptor superfamily member 16 (Gp80-LNGFR) (Low affinity neurotrophin receptor p75NTR) (Low-affinity nerve growth factor receptor) (NGF receptor) (p75 ICD) (CD antigen CD271)	0.90303	10	0.000343612	0.334839	22	0.127703	0.568191	0.835876
1137488	6600-Q9H9B1_EHMT1,X7576.Q9UPT6_JIP3	EHMT1	Q9H9B1	EHMT1	Histone-lysine N-methyltransferase EHMT1 (EC 2.1.1.-) (EC 2.1.1.367) (Euchromatic histone-lysine N-methyltransferase 1) (Eu-HMTase1) (G9a-like protein 1) (GLP) (GLP1) (Histone H3-K9 methyltransferase 5) (H3-K9-HMTase 5) (Lysine N-methyltransferase 1D)	MAPK8IP3	Q9UPT6	JIP3	C-Jun-amino-terminal kinase-interacting protein 3 (JIP-3) (JNK-interacting protein 3) (JNK MAP kinase scaffold protein 3) (Mitogen-activated protein kinase 8-interacting protein 3)	0.93007	12	1.17e-05	0.363636	23	0.0880745	0.566434	0.827639
381847	1397-P14921_ETS1,X2918.Q11201_SIA4A	ETS1	P14921	ETS1	Protein C-ets-1 (p54)	ST3GAL1	Q11201	SIA4A	CMP-N-acetylneuraminate-beta-galactosamide-alpha-2,3-sialyltransferase 1 (Alpha 2,3-ST 1) (Beta-galactoside alpha-2,3-sialyltransferase 1) (EC 2.4.3.4) (Gal-NAc6S) (Gal-beta-1,3-GalNAc-alpha-2,3-sialyltransferase) (Monosialoganglioside sialyltransferase) (EC 2.4.3.2) (SIATFL) (ST3Gal I) (ST3GalI) (ST3GalA.1) (ST3O) (Sialyltransferase 4A) (SIAT4-A)	0.964286	7	0.000454149	0.39951	17	0.112118	0.564776	0.819872
767371	3186-Q14161_GIT2,X4063.Q6PCB8_EMB	GIT2	Q14161	GIT2	ARF GTPase-activating protein GIT2 (ARF GAP GIT2) (Cool-interacting tyrosine-phosphorylated protein 2) (CAT-2) (CAT2) (G protein-coupled receptor kinase-interactor 2) (GRK-interacting protein 2)	EMB	Q6PCB8	EMB	Embigin	0.90303	10	0.000343612	0.338961	21	0.132811	0.564069	0.81656
772378	3213-Q14314_FGL2,X6507.Q9H649_NSUN3	FGL2	Q14314	FGL2	Fibroleukin (Fibrinogen-like protein 2) (pT49)	NSUN3	Q9H649	NSUN3	tRNA (cytosine(34)-C(5))-methyltransferase, mitochondrial (EC 2.1.1.-) (NOL1/NOP2/Sun domain family member 3)	1	4	0	0.436364	11	0.179665	0.563636	0.814532
925656	4248-Q7L2H7_EIF3M,X7032.Q9NXG6_P4HTM	EIF3M	Q7L2H7	EIF3M	Eukaryotic translation initiation factor 3 subunit M (eIF3m) (Fetal lung protein B5) (hFL-B5) (PCI domain-containing protein 1)	P4HTM	Q9NXG6	P4HTM	Transmembrane prolyl 4-hydroxylase (P4H-TM) (EC 1.14.11.29) (Hypoxia-inducible factor prolyl hydroxylase 4) (HIF-PH4) (HIF-prolyl hydroxylase 4) (HPH-4)	0.937063	12	6.99e-06	0.376482	23	0.076616	0.560581	0.800213
666933	2645-P78549_NTH,X6474.Q9H4B0_OSGP2	NTHL1	P78549	NTH	Endonuclease III-like protein 1 (hNTH1) (EC 3.2.2.-) (EC 4.2.99.18) (Bifunctional DNA N-glycosylase/DNA-(apurinic or apyrimidinic site) lyase) (DNA glycosylase/AP lyase)	OSGEPL1	Q9H4B0	OSGP2	tRNA N6-adenosine threonylcarbamoyltransferase, mitochondrial (EC 2.3.1.234) (N6-L-threonylcarbamoyladenine synthase) (t(6)A synthase) (O-sialoglycoprotein endopeptidase-like protein 1) (OSGEP-like protein 1) (t(6)A37 threonylcarbamoyladenosine biosynthesis protein OSGEPL1) (tRNA threonylcarbamoyladenosine biosynthesis protein OSGEPL1)	0.939394	10	5.48e-05	0.381141	22	0.0800988	0.558253	0.789307
541611	2061-P46379_BAG6,X4422.Q86VE9_SERC5	BAG6	P46379	BAG6	Large proline-rich protein BAG6 (BAG family molecular chaperone regulator 6) (BCL2-associated athanogene 6) (BAG-6) (HLA-B-associated transcript 3) (Protein G3) (Protein Scythe)	SERINC5	Q86VE9	SERC5	Serine incorporator 5	0.906593	13	1.93e-05	0.348461	25	0.0878061	0.558132	0.788738
720853	2921-Q12767_TMM94,X3655.Q53GT1_KLH22	TMEM94	Q12767	TMM94	Transmembrane protein 94	KLHL22	Q53GT1	KLH22	Kelch-like protein 22	1	6	0	0.445454	11	0.169733	0.554546	0.771933
717571	2901-Q0IIM8_TBC8B,X2921.Q12767_TMM94	TBC1D8B	Q0IIM8	TBC8B	TBC1 domain family member 8B	TMEM94	Q12767	TMM94	Transmembrane protein 94	0.951515	10	2.28e-05	0.400339	22	0.0648585	0.551176	0.756145
565732	2161-P49711_CTCF,X3440.Q15758_AAAT	CTCF	P49711	CTCF	Transcriptional repressor CTCF (11-zinc finger protein) (CCCTC-binding factor) (CTCFL paralog)	SLC1A5	Q15758	AAAT	Neutral amino acid transporter B(0) (ATB(0)) (Baboon M7 virus receptor) (RD114/simian type D retrovirus receptor) (Sodium-dependent neutral amino acid transporter type 2) (Solute carrier family 1 member 5)	0.905057	18	2.46e-07	0.354622	34	0.0396039	0.550435	0.752671
673147	2670-P82970_HMGN5,X5620.Q96HQ2_C2AIL	HMGN5	P82970	HMGN5	High mobility group nucleosome-binding domain-containing protein 5 (Nucleosome-binding protein 1)	CDKN2AIPNL	Q96HQ2	C2AIL	CDKN2AIP N-terminal-like protein (CDKN2A-interacting protein N-terminal-like protein)	0.917582	13	9.91e-06	0.37	25	0.0686806	0.547582	0.739304
984230	4727-Q8N4C6_NIN,X6654.Q9HBB8_CDHR5	NIN	Q8N4C6	NIN	Ninein (hNinein) (Glycogen synthase kinase 3 beta-interacting protein) (GSK3B-interacting protein)	CDHR5	Q9HBB8	CDHR5	Cadherin-related family member 5 (Mu-protocadherin) (Mucin and cadherin-like protein) (Mucin-like protocadherin) (MLPCDH)	0.909091	11	0.000105593	0.362648	23	0.0890061	0.546443	0.733963
492498	1845-P32926_DSG3,X2395.P55201_BRPF1	DSG3	P32926	DSG3	Desmoglein-3 (130 kDa pemphigus vulgaris antigen) (PVA) (Cadherin family member 6)	BRPF1	P55201	BRPF1	Peregrin (Bromodomain and PHD finger-containing protein 1) (Protein Br140)	0.909091	11	0.000105593	0.36391	20	0.114725	0.545181	0.728051
229698	829-O94898_LRIG2,X7755.Q9Y3I1_FBX7	LRIG2	O94898	LRIG2	Leucine-rich repeats and immunoglobulin-like domains protein 2 (LIG-2)	FBXO7	Q9Y3I1	FBX7	F-box only protein 7	0.909091	12	4.19e-05	0.364625	23	0.0871502	0.544466	0.724702
350747	1270-P10412_H14,X5620.Q96HQ2_C2AIL	H1-4	P10412	H14	Histone H1.4 (Histone H1b) (Histone H1s-4)	CDKN2AIPNL	Q96HQ2	C2AIL	CDKN2AIP N-terminal-like protein (CDKN2A-interacting protein N-terminal-like protein)	0.93956	13	1.88e-06	0.395385	25	0.0504337	0.544176	0.72334
556510	2123-P48960_CD97,X7191.Q9P2J3_KLHL9	ADGRE5	P48960	CD97	Adhesion G protein-coupled receptor E5 (Leukocyte antigen CD97) (CD antigen CD97) [Cleaved into: Adhesion G protein-coupled receptor E5 subunit alpha; Adhesion G protein-coupled receptor E5 subunit beta]	KLHL9	Q9P2J3	KLHL9	Kelch-like protein 9	0.910714	15	2.4e-06	0.366852	30	0.0461421	0.543862	0.721871
218296	784-O76054_S14L2,X7026.Q9NXA8_SIR5	SEC14L2	O76054	S14L2	SEC14-like protein 2 (Alpha-tocopherol-associated protein) (TAP) (hTAP) (Squalene transfer protein) (Supernatant protein factor) (SPF)	SIRT5	Q9NXA8	SIR5	NAD-dependent protein deacylase sirtuin-5, mitochondrial (EC 2.3.1.-) (Regulatory protein SIR2 homolog 5) (SIR2-like protein 5)	0.900929	18	3.41e-07	0.358289	34	0.0374649	0.54264	0.716144
680555	2709-Q00266_METK1,X3164.Q14112_NID2	MAT1A	Q00266	METK1	S-adenosylmethionine synthase isoform type-1 (AdoMet synthase 1) (EC 2.5.1.6) (Methionine adenosyltransferase 1) (MAT 1) (Methionine adenosyltransferase I/III) (MAT-I/III)	NID2	Q14112	NID2	Nidogen-2 (NID-2) (Osteonidogen)	0.95	9	8.76e-05	0.409314	17	0.102784	0.540686	0.706989
1037940	5237-Q92581_SL9A6,X5866.Q96T88_UHRF1	SLC9A6	Q92581	SL9A6	Sodium/hydrogen exchanger 6 (Na(+)/H(+) exchanger 6) (NHE-6) (Solute carrier family 9 member 6)	UHRF1	Q96T88	UHRF1	E3 ubiquitin-protein ligase UHRF1 (EC 2.3.2.27) (Inverted CCAAT box-binding protein of 90 kDa) (Nuclear protein 95) (Nuclear zinc finger protein Np95) (HuNp95) (hNp95) (RING finger protein 106) (RING-type E3 ubiquitin transferase UHRF1) (Transcription factor ICBP90) (Ubiquitin-like PHD and RING finger domain-containing protein 1) (hUHRF1) (Ubiquitin-like-containing PHD and RING finger domains pro…	0.915377	18	1.01e-07	0.375707	34	0.0285451	0.53967	0.702227
847374	3682-Q5BJF2_SGMR2,X4709.Q8N3F0_MTURN	TMEM97	Q5BJF2	SGMR2	Sigma intracellular receptor 2 (Sigma-2 receptor) (Sigma2 receptor) (Meningioma-associated protein 30) (Transmembrane protein 97)	MTURN	Q8N3F0	MTURN	Maturin (Maturin neural progenitor differentiation regulator protein homolog) (Protein Ells1)	0.939394	10	5.48e-05	0.402597	21	0.0703858	0.536797	0.688761
307034	1113-P05549_AP2A,X3812.Q5TB80_CE162	TFAP2A	P05549	AP2A	Transcription factor AP-2-alpha (AP2-alpha) (AP-2 transcription factor) (Activating enhancer-binding protein 2-alpha) (Activator protein 2) (AP-2)	CEP162	Q5TB80	CE162	Centrosomal protein of 162 kDa (Cep162) (Protein QN1 homolog)	0.901099	13	2.61e-05	0.364615	25	0.0731308	0.536484	0.687295
940694	4366-Q86SK9_SCD5,X6303.Q9C0H9_SRCN1	SCD5	Q86SK9	SCD5	Stearoyl-CoA desaturase 5 (EC 1.14.19.1) (Acyl-CoA-desaturase 4) (HSCD5) (Stearoyl-CoA 9-desaturase) (Stearoyl-CoA desaturase 2)	SRCIN1	Q9C0H9	SRCN1	SRC kinase signaling inhibitor 1 (SNAP-25-interacting protein) (SNIP) (p130Cas-associated protein) (p140Cap)	0.907692	14	7.3e-06	0.376068	27	0.0532007	0.531624	0.664523
1071667	5620-Q96HQ2_C2AIL,X6797.Q9NQU5_PAK6	CDKN2AIPNL	Q96HQ2	C2AIL	CDKN2AIP N-terminal-like protein (CDKN2A-interacting protein N-terminal-like protein)	PAK6	Q9NQU5	PAK6	Serine/threonine-protein kinase PAK 6 (EC 2.7.11.1) (PAK-5) (p21-activated kinase 6) (PAK-6)	0.97619	8	3.31e-05	0.444788	18	0.0643852	0.531402	0.663483
677785	2694-P98095_FBLN2,X7316.Q9UHB9_SRP68	FBLN2	P98095	FBLN2	Fibulin-2 (FIBL-2)	SRP68	Q9UHB9	SRP68	Signal recognition particle subunit SRP68 (SRP68) (Signal recognition particle 68 kDa protein)	0.90303	10	0.000343612	0.372727	21	0.0961023	0.530303	0.658333
49434	184-O14494_PLPP1,X4891.Q8NDI1_EHBP1	PLPP1	O14494	PLPP1	Phospholipid phosphatase 1 (EC 3.1.3.-) (EC 3.1.3.106) (EC 3.1.3.4) (EC 3.1.3.81) (Lipid phosphate phosphohydrolase 1) (PAP2-alpha) (Phosphatidate phosphohydrolase type 2a) (Phosphatidic acid phosphatase 2a) (PAP-2a) (PAP2a)	EHBP1	Q8NDI1	EHBP1	EH domain-binding protein 1	0.915152	10	0.000204472	0.392208	21	0.0786603	0.522944	0.623848
69618	250-O14933_UB2L6,X1178.P08138_TNR16	UBE2L6	O14933	UB2L6	Ubiquitin/ISG15-conjugating enzyme E2 L6 (EC 2.3.2.23) (E2 ubiquitin-conjugating enzyme L6) (Retinoic acid-induced gene B protein) (RIG-B) (UbcH8) (Ubiquitin carrier protein L6) (Ubiquitin-protein ligase L6)	NGFR	P08138	TNR16	Tumor necrosis factor receptor superfamily member 16 (Gp80-LNGFR) (Low affinity neurotrophin receptor p75NTR) (Low-affinity nerve growth factor receptor) (NGF receptor) (p75 ICD) (CD antigen CD271)	0.90303	10	0.000343612	0.381141	22	0.0800988	0.52189	0.618909
147255	522-O60303_K0556,X7473.Q9ULD9_ZN608	KATNIP	O60303	K0556	Katanin-interacting protein	ZNF608	Q9ULD9	ZN608	Zinc finger protein 608 (Renal carcinoma antigen NY-REN-36)	0.933333	9	0.0002359	0.411765	18	0.0895391	0.521569	0.617404
765769	3176-Q14145_KEAP1,X3986.Q6NSZ9_ZSC25	KEAP1	Q14145	KEAP1	Kelch-like ECH-associated protein 1 (Cytosolic inhibitor of Nrf2) (INrf2) (Kelch-like protein 19)	ZSCAN25	Q6NSZ9	ZSC25	Zinc finger and SCAN domain-containing protein 25 (Zinc finger protein 498)	0.963636	10	7.32e-06	0.442857	21	0.0443771	0.520779	0.613705
822937	3524-Q16877_F264,X7633.Q9Y291_RT33	PFKFB4	Q16877	F264	6-phosphofructo-2-kinase/fructose-2,6-bisphosphatase 4 (6PF-2-K/Fru-2,6-P2ase 4) (PFK/FBPase 4) (6PF-2-K/Fru-2,6-P2ase testis-type isozyme) [Includes: 6-phosphofructo-2-kinase (EC 2.7.1.105); Fructose-2,6-bisphosphatase (EC 3.1.3.46)]	MRPS33	Q9Y291	RT33	28S ribosomal protein S33, mitochondrial (MRP-S33) (S33mt) (Mitochondrial small ribosomal subunit protein mS33)	0.925275	14	2.14e-06	0.406678	28	0.0317433	0.518597	0.60348
378379	1384-P14543_NID1,X5560.Q96FL9_GLT14	NID1	P14543	NID1	Nidogen-1 (NID-1) (Entactin)	GALNT14	Q96FL9	GLT14	Polypeptide N-acetylgalactosaminyltransferase 14 (EC 2.4.1.41) (Polypeptide GalNAc transferase 14) (GalNAc-T14) (pp-GaNTase 14) (Protein-UDP acetylgalactosaminyltransferase 14) (UDP-GalNAc:polypeptide N-acetylgalactosaminyltransferase 14)	1	5	0	0.481818	11	0.133434	0.518182	0.601534
446839	1653-P24539_AT5F1,X3936.Q6DN12_MCTP2	ATP5PB	P24539	AT5F1	ATP synthase F(0) complex subunit B1, mitochondrial (ATP synthase peripheral stalk-membrane subunit b) (ATP synthase proton-transporting mitochondrial F(0) complex subunit B1) (ATP synthase subunit b) (ATPase subunit b)	MCTP2	Q6DN12	MCTP2	Multiple C2 and transmembrane domain-containing protein 2	0.918182	11	6.66e-05	0.4	20	0.0805539	0.518182	0.601534
613889	2402-P55268_LAMB2,X6099.Q9BUB5_MKNK1	LAMB2	P55268	LAMB2	Laminin subunit beta-2 (Laminin B1s chain) (Laminin-11 subunit beta) (Laminin-14 subunit beta) (Laminin-15 subunit beta) (Laminin-3 subunit beta) (Laminin-4 subunit beta) (Laminin-7 subunit beta) (Laminin-9 subunit beta) (S-laminin subunit beta) (S-LAM beta)	MKNK1	Q9BUB5	MKNK1	MAP kinase-interacting serine/threonine-protein kinase 1 (EC 2.7.11.1) (MAP kinase signal-integrating kinase 1) (MAPK signal-integrating kinase 1) (Mnk1)	0.923633	18	4.57e-08	0.405653	34	0.0173023	0.517979	0.600585
235796	850-O94979_SC31A,X4063.Q6PCB8_EMB	SEC31A	O94979	SC31A	Protein transport protein Sec31A (ABP125) (ABP130) (SEC31-like protein 1) (SEC31-related protein A) (Web1-like protein)	EMB	Q6PCB8	EMB	Embigin	0.939394	10	5.48e-05	0.422078	21	0.0566593	0.517316	0.597476
709172	2855-Q07654_TFF3,X5028.Q8TD06_AGR3	TFF3	Q07654	TFF3	Trefoil factor 3 (Intestinal trefoil factor) (hITF) (Polypeptide P1.B) (hP1.B)	AGR3	Q8TD06	AGR3	Anterior gradient protein 3 (AG-3) (AG3) (hAG-3) (Anterior gradient 3 homolog) (Breast cancer membrane protein 11) (Protein disulfide isomerase family A, member 18)	0.954546	11	4.99e-06	0.437594	20	0.0536614	0.516952	0.595768
999764	4869-Q8NCE0_SEN2,X6143.Q9BVJ6_UT14A	TSEN2	Q8NCE0	SEN2	tRNA-splicing endonuclease subunit Sen2 (EC 4.6.1.16) (tRNA-intron endonuclease Sen2) (HsSen2)	UTP14A	Q9BVJ6	UT14A	U3 small nucleolar RNA-associated protein 14 homolog A (Antigen NY-CO-16) (Serologically defined colon cancer antigen 16)	0.902993	18	2.9e-07	0.386096	34	0.0241109	0.516896	0.595511
365202	1330-P12271_RLBP1,X4482.Q86YA3_ZGRF1	RLBP1	P12271	RLBP1	Retinaldehyde-binding protein 1 (Cellular retinaldehyde-binding protein)	ZGRF1	Q86YA3	ZGRF1	Protein ZGRF1 (GRF-type zinc finger domain-containing protein 1)	0.95055	13	6.36e-07	0.433846	25	0.0302528	0.516703	0.594606
1134409	6536-Q9H788_SH24A,X6833.Q9NRH2_SNRK	SH2D4A	Q9H788	SH24A	SH2 domain-containing protein 4A (Protein SH(2)A) (Protein phosphatase 1 regulatory subunit 38)	SNRK	Q9NRH2	SNRK	SNF-related serine/threonine-protein kinase (EC 2.7.11.1) (SNF1-related kinase)	0.902098	12	6e-05	0.386364	23	0.068597	0.515734	0.590065
1134137	6530-Q9H6Y2_WDR55,X7378.Q9UIW2_PLXA1	WDR55	Q9H6Y2	WDR55	WD repeat-containing protein 55	PLXNA1	Q9UIW2	PLXA1	Plexin-A1 (Semaphorin receptor NOV)	0.907121	18	2.07e-07	0.391902	34	0.0218915	0.515219	0.587648
1102576	6002-Q9BQT9_CSTN3,X6382.Q9H147_TDIF1	CLSTN3	Q9BQT9	CSTN3	Calsyntenin-3 (Alcadein-beta) (Alc-beta)	DNTTIP1	Q9H147	TDIF1	Deoxynucleotidyltransferase terminal-interacting protein 1 (Terminal deoxynucleotidyltransferase-interacting factor 1) (TdIF1) (TdT-interacting factor 1)	0.917441	18	8.36e-08	0.403209	34	0.0180536	0.514232	0.583025
679495	2703-P98194_AT2C1,X5185.Q8WXI7_MUC16	ATP2C1	P98194	AT2C1	Calcium-transporting ATPase type 2C member 1 (ATPase 2C1) (EC 7.2.2.10) (ATP-dependent Ca(2+) pump PMR1) (Ca(2+)/Mn(2+)-ATPase 2C1) (Secretory pathway Ca(2+)-transporting ATPase type 1) (SPCA1)	MUC16	Q8WXI7	MUC16	Mucin-16 (MUC-16) (Ovarian cancer-related tumor marker CA125) (CA-125) (Ovarian carcinoma antigen CA125)	0.954546	11	4.99e-06	0.445113	20	0.0492253	0.509433	0.560535
72960	260-O14976_GAK,X6552.Q9H7U1_CCSE2	GAK	O14976	GAK	Cyclin-G-associated kinase (EC 2.7.11.1)	CCSER2	Q9H7U1	CCSE2	Serine-rich coiled-coil domain-containing protein 2 (Coiled-coil serine-rich protein 2) (Protein GCAP14 homolog)	0.909091	11	0.000105593	0.4	20	0.0805539	0.509091	0.558934
107349	378-O43167_ZBT24,X5511.Q96E29_MTEF3	ZBTB24	O43167	ZBT24	Zinc finger and BTB domain-containing protein 24 (Zinc finger protein 450)	MTERF3	Q96E29	MTEF3	Transcription termination factor 3, mitochondrial (Mitochondrial transcription termination factor 3) (mTERF3) (mTERF domain-containing protein 1, mitochondrial)	0.90303	10	0.000343612	0.396951	22	0.0673734	0.506079	0.544822
763669	3164-Q14112_NID2,X5056.Q8TEA8_DTD1	NID2	Q14112	NID2	Nidogen-2 (NID-2) (Osteonidogen)	DTD1	Q8TEA8	DTD1	D-aminoacyl-tRNA deacylase 1 (DTD) (EC 3.1.1.96) (DNA-unwinding element-binding protein B) (DUE-B) (Gly-tRNA(Ala) deacylase) (Histidyl-tRNA synthase-related)	0.927273	11	3.97e-05	0.422556	20	0.0634408	0.504716	0.538435
77164	276-O15054_KDM6B,X4962.Q8NI27_THOC2	KDM6B	O15054	KDM6B	Lysine-specific demethylase 6B (EC 1.14.11.68) (JmjC domain-containing protein 3) (Jumonji domain-containing protein 3) (Lysine demethylase 6B) ([histone H3]-trimethyl-L-lysine(27) demethylase 6B)	THOC2	Q8NI27	THOC2	THO complex subunit 2 (Tho2) (hTREX120)	0.963636	10	7.32e-06	0.45974	21	0.0360083	0.503896	0.534591
832243	3584-Q3KRA6_CB076,X4211.Q70EK8_UBP53	C2orf76	Q3KRA6	CB076	UPF0538 protein C2orf76	USP53	Q70EK8	UBP53	Inactive ubiquitin carboxyl-terminal hydrolase 53 (Inactive ubiquitin-specific peptidase 53)	0.928571	7	0.00251947	0.426471	17	0.0878046	0.502101	0.526179
1118	5-A0AVI4_TM129,X4422.Q86VE9_SERC5	TMEM129	A0AVI4	TM129	E3 ubiquitin-protein ligase TM129 (EC 2.3.2.27) (RING-type E3 ubiquitin transferase TM129)	SERINC5	Q86VE9	SERC5	Serine incorporator 5	0.904762	8	0.00200828	0.402941	16	0.121746	0.501821	0.524866
1102654	6003-Q9BR39_JPH2,X6201.Q9BXL7_CAR11	JPH2	Q9BR39	JPH2	Junctophilin-2 (JP-2) (Junctophilin type 2) [Cleaved into: Junctophilin-2 N-terminal fragment (JP2NT)]	CARD11	Q9BXL7	CAR11	Caspase recruitment domain-containing protein 11 (CARD-containing MAGUK protein 1) (Carma 1)	0.942857	6	0.00480466	0.442857	15	0.0982941	0.5	0.516334
682368	2717-Q00577_PURA,X4152.Q6WCQ1_MPRIP	PURA	Q00577	PURA	Transcriptional activator protein Pur-alpha (Purine-rich single-stranded DNA-binding protein alpha)	MPRIP	Q6WCQ1	MPRIP	Myosin phosphatase Rho-interacting protein (M-RIP) (Rho-interacting protein 3) (RIP3) (p116Rip)	0.905057	18	2.46e-07	0.409015	34	0.016312	0.496042	0.497789
301618	1097-P05129_KPCG,X6131.Q9BV79_MECR	PRKCG	P05129	KPCG	Protein kinase C gamma type (PKC-gamma) (EC 2.7.11.13)	MECR	Q9BV79	MECR	Enoyl-[acyl-carrier-protein] reductase, mitochondrial (EC 1.3.1.104) (2-enoyl thioester reductase) (Nuclear receptor-binding factor 1) (HsNrbf-1) (NRBF-1)	0.901099	13	2.61e-05	0.405128	26	0.0400589	0.495971	0.497453
556307	2123-P48960_CD97,X2370.P54753_EPHB3	ADGRE5	P48960	CD97	Adhesion G protein-coupled receptor E5 (Leukocyte antigen CD97) (CD antigen CD97) [Cleaved into: Adhesion G protein-coupled receptor E5 subunit alpha; Adhesion G protein-coupled receptor E5 subunit beta]	EPHB3	P54753	EPHB3	Ephrin type-B receptor 3 (EC 2.7.10.1) (EPH-like tyrosine kinase 2) (EPH-like kinase 2) (Embryonic kinase 2) (EK2) (hEK2) (Tyrosine-protein kinase TYRO6)	0.946336	18	2.92e-09	0.452406	34	0.00722326	0.49393	0.487891
324873	1178-P08138_TNR16,X5951.Q99941_ATF6B	NGFR	P08138	TNR16	Tumor necrosis factor receptor superfamily member 16 (Gp80-LNGFR) (Low affinity neurotrophin receptor p75NTR) (Low-affinity nerve growth factor receptor) (NGF receptor) (p75 ICD) (CD antigen CD271)	ATF6B	Q99941	ATF6B	Cyclic AMP-dependent transcription factor ATF-6 beta (cAMP-dependent transcription factor ATF-6 beta) (Activating transcription factor 6 beta) (ATF6-beta) (Protein G13) (cAMP response element-binding protein-related protein) (Creb-rp) (cAMP-responsive element-binding protein-like 1) [Cleaved into: Processed cyclic AMP-dependent transcription factor ATF-6 beta]	0.939394	10	5.48e-05	0.44777	22	0.0366426	0.491624	0.477086
607344	2370-P54753_EPHB3,X7191.Q9P2J3_KLHL9	EPHB3	P54753	EPHB3	Ephrin type-B receptor 3 (EC 2.7.10.1) (EPH-like tyrosine kinase 2) (EPH-like kinase 2) (Embryonic kinase 2) (EK2) (hEK2) (Tyrosine-protein kinase TYRO6)	KLHL9	Q9P2J3	KLHL9	Kelch-like protein 9	0.925	15	7.99e-07	0.433593	30	0.0166788	0.491407	0.476068
1074904	5657-Q96J94_PIWL1,X7600.Q9UQN3_CHM2B	PIWIL1	Q96J94	PIWL1	Piwi-like protein 1 (EC 3.1.26.-)	CHMP2B	Q9UQN3	CHM2B	Charged multivesicular body protein 2b (CHMP2.5) (Chromatin-modifying protein 2b) (CHMP2b) (Vacuolar protein sorting-associated protein 2-2) (Vps2-2) (hVps2-2)	0.93007	12	1.17e-05	0.439723	23	0.0357679	0.490347	0.471099
693624	2775-Q02878_RL6,X3242.Q14623_IHH	RPL6	Q02878	RL6	60S ribosomal protein L6 (Large ribosomal subunit protein eL6) (Neoplasm-related protein C140) (Tax-responsive enhancer element-binding protein 107) (TaxREB107)	IHH	Q14623	IHH	Indian hedgehog protein (IHH) (EC 3.1.-.-) (HHG-2) [Cleaved into: Indian hedgehog protein N-product]	0.916084	12	2.84e-05	0.426325	26	0.0298723	0.489759	0.468346
170867	614-O75064_DEN4B,X2550.P62330_ARF6	DENND4B	O75064	DEN4B	DENN domain-containing protein 4B	ARF6	P62330	ARF6	ADP-ribosylation factor 6 (EC 3.6.5.2)	0.920588	16	4.32e-07	0.431818	32	0.0135909	0.48877	0.463711
191495	687-O75460_ERN1,X4772.Q8N5X7_IF4E3	ERN1	O75460	ERN1	Serine/threonine-protein kinase/endoribonuclease IRE1 (Endoplasmic reticulum-to-nucleus signaling 1) (Inositol-requiring protein 1) (hIRE1p) (Ire1-alpha) (IRE1a) [Includes: Serine/threonine-protein kinase (EC 2.7.11.1); Endoribonuclease (EC 3.1.26.-)]	EIF4E3	Q8N5X7	IF4E3	Eukaryotic translation initiation factor 4E type 3 (eIF-4E type 3) (eIF-4E3) (eIF4E type 3) (eIF4E-3)	0.942857	6	0.00480466	0.454545	10	0.186905	0.488312	0.461563
403157	1486-P17677_NEUM,X7611.Q9Y237_PIN4	GAP43	P17677	NEUM	Neuromodulin (Axonal membrane protein GAP-43) (Growth-associated protein 43) (Neural phosphoprotein B-50) (pp46)	PIN4	Q9Y237	PIN4	Peptidyl-prolyl cis-trans isomerase NIMA-interacting 4 (EC 5.2.1.8) (Parvulin-14) (Par14) (hPar14) (Parvulin-17) (Par17) (hPar17) (Peptidyl-prolyl cis-trans isomerase Pin4) (PPIase Pin4) (Peptidyl-prolyl cis/trans isomerase EPVH) (hEPVH) (Rotamase Pin4)	0.923077	12	1.86e-05	0.435771	23	0.0376607	0.487306	0.456851
709367	2855-Q07654_TFF3,X7829.Q9Y572_RIPK3	TFF3	Q07654	TFF3	Trefoil factor 3 (Intestinal trefoil factor) (hITF) (Polypeptide P1.B) (hP1.B)	RIPK3	Q9Y572	RIPK3	Receptor-interacting serine/threonine-protein kinase 3 (EC 2.7.11.1) (RIP-like protein kinase 3) (Receptor-interacting protein 3) (RIP-3)	0.972727	11	5.14e-07	0.485714	20	0.0299208	0.487013	0.455478
974310	4638-Q8IYW5_RN168,X5903.Q99590_SCAFB	RNF168	Q8IYW5	RN168	E3 ubiquitin-protein ligase RNF168 (hRNF168) (EC 2.3.2.27) (RING finger protein 168) (RING-type E3 ubiquitin transferase RNF168)	SCAF11	Q99590	SCAFB	Protein SCAF11 (CTD-associated SR protein 11) (Renal carcinoma antigen NY-REN-40) (SC35-interacting protein 1) (SR-related and CTD-associated factor 11) (SRSF2-interacting protein) (Serine/arginine-rich splicing factor 2-interacting protein) (Splicing factor, arginine/serine-rich 2-interacting protein) (Splicing regulatory protein 129) (SRrp129)	0.902993	18	2.9e-07	0.416959	34	0.0141582	0.486033	0.450887
646668	2552-P62424_RL7A,X5543.Q96EY4_TMA16	RPL7A	P62424	RL7A	60S ribosomal protein L7a (Large ribosomal subunit protein eL8) (PLA-X polypeptide) (Surfeit locus protein 3)	TMA16	Q96EY4	TMA16	Translation machinery-associated protein 16	0.915377	18	1.01e-07	0.429488	34	0.0112491	0.485889	0.450208
959002	4509-Q8IUS5_EPHX4,X6683.Q9HCC0_MCCB	EPHX4	Q8IUS5	EPHX4	Epoxide hydrolase 4 (EC 3.3.-.-) (Abhydrolase domain-containing protein 7) (Epoxide hydrolase-related protein)	MCCC2	Q9HCC0	MCCB	Methylcrotonoyl-CoA carboxylase beta chain, mitochondrial (MCCase subunit beta) (EC 6.4.1.4) (3-methylcrotonyl-CoA carboxylase 2) (3-methylcrotonyl-CoA carboxylase non-biotin-containing subunit) (3-methylcrotonyl-CoA:carbon dioxide ligase subunit beta)	0.906593	13	1.93e-05	0.420855	26	0.0322759	0.485739	0.449506
196855	706-O75533_SF3B1,X2645.P78549_NTH	SF3B1	O75533	SF3B1	Splicing factor 3B subunit 1 (Pre-mRNA-splicing factor SF3b 155 kDa subunit) (SF3b155) (Spliceosome-associated protein 155) (SAP 155)	NTHL1	P78549	NTH	Endonuclease III-like protein 1 (hNTH1) (EC 3.2.2.-) (EC 4.2.99.18) (Bifunctional DNA N-glycosylase/DNA-(apurinic or apyrimidinic site) lyase) (DNA glycosylase/AP lyase)	0.915152	10	0.000204472	0.429701	22	0.0459466	0.485451	0.448157
235288	848-O94972_TRI37,X5552.Q96F46_I17RA	TRIM37	O94972	TRI37	E3 ubiquitin-protein ligase TRIM37 (EC 2.3.2.27) (Mulibrey nanism protein) (RING-type E3 ubiquitin transferase TRIM37) (Tripartite motif-containing protein 37)	IL17RA	Q96F46	I17RA	Interleukin-17 receptor A (IL-17 receptor A) (IL-17RA) (CDw217) (CD antigen CD217)	1	5	0	0.516484	13	0.070749	0.483516	0.439093
77140	276-O15054_KDM6B,X2927.Q12789_TF3C1	KDM6B	O15054	KDM6B	Lysine-specific demethylase 6B (EC 1.14.11.68) (JmjC domain-containing protein 3) (Jumonji domain-containing protein 3) (Lysine demethylase 6B) ([histone H3]-trimethyl-L-lysine(27) demethylase 6B)	GTF3C1	Q12789	TF3C1	General transcription factor 3C polypeptide 1 (TF3C-alpha) (TFIIIC box B-binding subunit) (Transcription factor IIIC 220 kDa subunit) (TFIIIC 220 kDa subunit) (TFIIIC220) (Transcription factor IIIC subunit alpha)	0.90303	10	0.000343612	0.422078	21	0.0566593	0.480952	0.427078
49413	184-O14494_PLPP1,X4085.Q6PIY7_GLD2	PLPP1	O14494	PLPP1	Phospholipid phosphatase 1 (EC 3.1.3.-) (EC 3.1.3.106) (EC 3.1.3.4) (EC 3.1.3.81) (Lipid phosphate phosphohydrolase 1) (PAP2-alpha) (Phosphatidate phosphohydrolase type 2a) (Phosphatidic acid phosphatase 2a) (PAP-2a) (PAP2a)	TENT2	Q6PIY7	GLD2	Poly(A) RNA polymerase GLD2 (hGLD-2) (EC 2.7.7.19) (PAP-associated domain-containing protein 4) (Terminal nucleotidyltransferase 2) (Terminal uridylyltransferase 2) (TUTase 2)	0.916667	9	0.000506619	0.437594	20	0.0536614	0.479073	0.41827
171053	614-O75064_DEN4B,X6489.Q9H4Z2_ZN335	DENND4B	O75064	DEN4B	DENN domain-containing protein 4B	ZNF335	Q9H4Z2	ZN335	Zinc finger protein 335 (NRC-interacting factor 1) (NIF-1)	0.902098	12	6e-05	0.423077	25	0.0351006	0.479021	0.418027
836767	3614-Q4G0I0_CSMT1,X5473.Q96CQ1_S2536	CCSMST1	Q4G0I0	CSMT1	Protein CCSMST1	SLC25A36	Q96CQ1	S2536	Solute carrier family 25 member 36	0.905057	18	2.46e-07	0.433461	34	0.0104395	0.471596	0.383235
606496	2366-P54687_BCAT1,X3660.Q53HC5_KLH26	BCAT1	P54687	BCAT1	Branched-chain-amino-acid aminotransferase, cytosolic (BCAT(c)) (EC 2.6.1.42) (Protein ECA39)	KLHL26	Q53HC5	KLH26	Kelch-like protein 26	0.902098	12	6e-05	0.43083	23	0.0401368	0.471268	0.381697
1030438	5158-Q8WWA1_TMM40,X6530.Q9H6Y2_WDR55	TMEM40	Q8WWA1	TMM40	Transmembrane protein 40	WDR55	Q9H6Y2	WDR55	WD repeat-containing protein 55	0.915377	18	1.01e-07	0.445073	34	0.00835016	0.470304	0.377181
997784	4852-Q8NBQ5_DHB11,X6552.Q9H7U1_CCSE2	HSD17B11	Q8NBQ5	DHB11	Estradiol 17-beta-dehydrogenase 11 (EC 1.1.1.62) (17-beta-hydroxysteroid dehydrogenase 11) (17-beta-HSD 11) (17bHSD11) (17betaHSD11) (17-beta-hydroxysteroid dehydrogenase XI) (17-beta-HSD XI) (17betaHSDXI) (Cutaneous T-cell lymphoma-associated antigen HD-CL-03) (CTCL-associated antigen HD-CL-03) (Dehydrogenase/reductase SDR family member 8) (Retinal short-chain dehydrogenase/reductase 2) (retSDR2…	CCSER2	Q9H7U1	CCSE2	Serine-rich coiled-coil domain-containing protein 2 (Coiled-coil serine-rich protein 2) (Protein GCAP14 homolog)	0.909091	11	0.000105593	0.439098	20	0.0527507	0.469993	0.375724
245920	885-O95239_KIF4A,X4714.Q8N3U4_STAG2	KIF4A	O95239	KIF4A	Chromosome-associated kinesin KIF4A (Chromokinesin-A)	STAG2	Q8N3U4	STAG2	Cohesin subunit SA-2 (SCC3 homolog 2) (Stromal antigen 2)	0.915377	18	1.01e-07	0.448739	34	0.0077693	0.466637	0.359998
689716	2753-Q01973_ROR1,X3070.Q13464_ROCK1	ROR1	Q01973	ROR1	Inactive tyrosine-protein kinase transmembrane receptor ROR1 (Neurotrophic tyrosine kinase, receptor-related 1)	ROCK1	Q13464	ROCK1	Rho-associated protein kinase 1 (EC 2.7.11.1) (Renal carcinoma antigen NY-REN-35) (Rho-associated, coiled-coil-containing protein kinase 1) (Rho-associated, coiled-coil-containing protein kinase I) (ROCK-I) (p160 ROCK-1) (p160ROCK)	0.909091	12	4.19e-05	0.442735	26	0.0235127	0.466356	0.358679
49407	184-O14494_PLPP1,X3980.Q6N063_OGFD2	PLPP1	O14494	PLPP1	Phospholipid phosphatase 1 (EC 3.1.3.-) (EC 3.1.3.106) (EC 3.1.3.4) (EC 3.1.3.81) (Lipid phosphate phosphohydrolase 1) (PAP2-alpha) (Phosphatidate phosphohydrolase type 2a) (Phosphatidic acid phosphatase 2a) (PAP-2a) (PAP2a)	OGFOD2	Q6N063	OGFD2	2-oxoglutarate and iron-dependent oxygenase domain-containing protein 2 (EC 1.14.11.-)	0.915152	10	0.000204472	0.449351	21	0.0409967	0.465801	0.356078
236065	851-O94985_CSTN1,X4753.Q8N5C8_TAB3	CLSTN1	O94985	CSTN1	Calsyntenin-1 (Alcadein-alpha) (Alc-alpha) (Alzheimer-related cadherin-like protein) (Non-classical cadherin XB31alpha) [Cleaved into: Soluble Alc-alpha (SAlc-alpha); CTF1-alpha (C-terminal fragment 1-alpha)]	TAB3	Q8N5C8	TAB3	TGF-beta-activated kinase 1 and MAP3K7-binding protein 3 (Mitogen-activated protein kinase kinase kinase 7-interacting protein 3) (NF-kappa-B-activating protein 1) (TAK1-binding protein 3) (TAB-3) (TGF-beta-activated kinase 1-binding protein 3)	0.909091	11	0.000105593	0.443676	23	0.033951	0.465415	0.35427
966662	4569-Q8IWU5_SULF2,X4981.Q8TAV3_CP2W1	SULF2	Q8IWU5	SULF2	Extracellular sulfatase Sulf-2 (hSulf-2) (EC 3.1.6.-)	CYP2W1	Q8TAV3	CP2W1	Cytochrome P450 2W1 (EC 1.14.14.-) (CYPIIW1)	0.915152	10	0.000204472	0.450649	21	0.0403453	0.464502	0.349993
798914	3380-Q15392_DHC24,X5552.Q96F46_I17RA	DHCR24	Q15392	DHC24	Delta(24)-sterol reductase (EC 1.3.1.72) (24-dehydrocholesterol reductase) (3-beta-hydroxysterol Delta-24-reductase) (Diminuto/dwarf1 homolog) (Seladin-1)	IL17RA	Q96F46	I17RA	Interleukin-17 receptor A (IL-17 receptor A) (IL-17RA) (CDw217) (CD antigen CD217)	0.951515	10	2.28e-05	0.487013	21	0.0251508	0.464502	0.349993
188869	678-O75420_GGYF1,X2694.P98095_FBLN2	GIGYF1	O75420	GGYF1	GRB10-interacting GYF protein 1 (PERQ amino acid-rich with GYF domain-containing protein 1)	FBLN2	P98095	FBLN2	Fibulin-2 (FIBL-2)	0.951515	10	2.28e-05	0.48961	21	0.0242705	0.461905	0.337822
186277	669-O75387_LAT3,X1836.P32189_GLPK	SLC43A1	O75387	LAT3	Large neutral amino acids transporter small subunit 3 (L-type amino acid transporter 3) (Prostate cancer overexpressed gene 1 protein) (Solute carrier family 43 member 1)	GK	P32189	GLPK	Glycerol kinase (GK) (Glycerokinase) (EC 2.7.1.30) (ATP:glycerol 3-phosphotransferase)	0.95	15	6.09e-08	0.488547	26	0.011329	0.461453	0.335705
192692	693-O75478_TAD2A,X4774.Q8N5Y8_PAR16	TADA2A	O75478	TAD2A	Transcriptional adapter 2-alpha (Transcriptional adapter 2-like) (ADA2-like protein)	PARP16	Q8N5Y8	PAR16	Protein mono-ADP-ribosyltransferase PARP16 (EC 2.4.2.-) (ADP-ribosyltransferase diphtheria toxin-like 15) (Poly [ADP-ribose] polymerase 16) (PARP-16)	0.942857	6	0.00480466	0.481818	11	0.133434	0.461039	0.333764
823938	3531-Q17R98_ZN827,X6733.Q9NP64_NO40	ZNF827	Q17R98	ZN827	Zinc finger protein 827	ZCCHC17	Q9NP64	NO40	Zinc finger CCHC domain-containing protein 17 (Nucleolar protein of 40 kDa) (pNO40) (Pnn-interacting nucleolar protein) (Putative S1 RNA-binding domain protein) (PS1D protein)	0.918182	11	6.66e-05	0.457143	20	0.0427185	0.461039	0.333764
426030	1572-P21266_GSTM3,X3900.Q687X5_STEA4	GSTM3	P21266	GSTM3	Glutathione S-transferase Mu 3 (EC 2.5.1.18) (GST class-mu 3) (GSTM3-3) (hGSTM3-3)	STEAP4	Q687X5	STEA4	Metalloreductase STEAP4 (EC 1.16.1.9) (Six-transmembrane epithelial antigen of prostate 4) (SixTransMembrane protein of prostate 2) (Tumor necrosis factor, alpha-induced protein 9)	0.909091	12	4.19e-05	0.450593	23	0.0309477	0.458498	0.321858
570243	2185-P49888_ST1E1,X2851.Q07157_ZO1	SULT1E1	P49888	ST1E1	Sulfotransferase 1E1 (ST1E1) (EC 2.8.2.4) (EST-1) (Estrogen sulfotransferase) (Sulfotransferase, estrogen-preferring)	TJP1	Q07157	ZO1	Tight junction protein ZO-1 (Tight junction protein 1) (Zona occludens protein 1) (Zonula occludens protein 1)	0.905882	16	1.36e-06	0.447581	32	0.0102101	0.458302	0.320938
324857	1178-P08138_TNR16,X5478.Q96CV9_OPTN	NGFR	P08138	TNR16	Tumor necrosis factor receptor superfamily member 16 (Gp80-LNGFR) (Low affinity neurotrophin receptor p75NTR) (Low-affinity nerve growth factor receptor) (NGF receptor) (p75 ICD) (CD antigen CD271)	OPTN	Q96CV9	OPTN	Optineurin (E3-14.7K-interacting protein) (FIP-2) (Huntingtin yeast partner L) (Huntingtin-interacting protein 7) (HIP-7) (Huntingtin-interacting protein L) (NEMO-related protein) (Optic neuropathy-inducing protein) (Transcription factor IIIA-interacting protein) (TFIIIA-IntP)	0.951515	10	2.28e-05	0.49633	22	0.0187993	0.455185	0.306335
666873	2645-P78549_NTH,X5657.Q96J94_PIWL1	NTHL1	P78549	NTH	Endonuclease III-like protein 1 (hNTH1) (EC 3.2.2.-) (EC 4.2.99.18) (Bifunctional DNA N-glycosylase/DNA-(apurinic or apyrimidinic site) lyase) (DNA glycosylase/AP lyase)	PIWIL1	Q96J94	PIWL1	Piwi-like protein 1 (EC 3.1.26.-)	0.942857	6	0.00480466	0.489286	15	0.0641604	0.453571	0.298772
1102655	6003-Q9BR39_JPH2,X7350.Q9UI09_NDUAC	JPH2	Q9BR39	JPH2	Junctophilin-2 (JP-2) (Junctophilin type 2) [Cleaved into: Junctophilin-2 N-terminal fragment (JP2NT)]	NDUFA12	Q9UI09	NDUAC	NADH dehydrogenase [ubiquinone] 1 alpha subcomplex subunit 12 (13 kDa differentiation-associated protein) (Complex I-B17.2) (CI-B17.2) (CIB17.2) (NADH-ubiquinone oxidoreductase subunit B17.2)	0.90303	10	0.000343612	0.451157	22	0.0350761	0.451873	0.290812
296439	1080-P04439_HLAA,X5341.Q93073_SBP2L	HLA-A	P04439	HLAA	HLA class I histocompatibility antigen, A alpha chain (Human leukocyte antigen A) (HLA-A)	SECISBP2L	Q93073	SBP2L	Selenocysteine insertion sequence-binding protein 2-like (SECIS-binding protein 2-like)	0.912088	13	1.4e-05	0.460513	26	0.0179111	0.451575	0.289417
463663	1724-P28070_PSB4,X7039.Q9NXR7_BABA2	PSMB4	P28070	PSB4	Proteasome subunit beta type-4 (26 kDa prosomal protein) (HsBPROS26) (PROS-26) (Macropain beta chain) (Multicatalytic endopeptidase complex beta chain) (Proteasome beta chain) (Proteasome chain 3) (HsN3)	BABAM2	Q9NXR7	BABA2	BRISC and BRCA1-A complex member 2 (BRCA1-A complex subunit BRE) (BRCA1/BRCA2-containing complex subunit 45) (Brain and reproductive organ-expressed protein)	0.911249	18	1.46e-07	0.45974	34	0.0062289	0.451508	0.289105
777052	3242-Q14623_IHH,X5550.Q96F25_ALG14	IHH	Q14623	IHH	Indian hedgehog protein (IHH) (EC 3.1.-.-) (HHG-2) [Cleaved into: Indian hedgehog protein N-product]	ALG14	Q96F25	ALG14	UDP-N-acetylglucosamine transferase subunit ALG14 homolog	0.93007	12	1.17e-05	0.478974	26	0.0133021	0.451095	0.28717
709325	2855-Q07654_TFF3,X7263.Q9UD71_PPR1B	TFF3	Q07654	TFF3	Trefoil factor 3 (Intestinal trefoil factor) (hITF) (Polypeptide P1.B) (hP1.B)	PPP1R1B	Q9UD71	PPR1B	Protein phosphatase 1 regulatory subunit 1B (DARPP-32) (Dopamine- and cAMP-regulated neuronal phosphoprotein)	0.945454	11	1.12e-05	0.496241	20	0.0260515	0.449214	0.278353
666928	2645-P78549_NTH,X6421.Q9H2H8_PPIL3	NTHL1	P78549	NTH	Endonuclease III-like protein 1 (hNTH1) (EC 3.2.2.-) (EC 4.2.99.18) (Bifunctional DNA N-glycosylase/DNA-(apurinic or apyrimidinic site) lyase) (DNA glycosylase/AP lyase)	PPIL3	Q9H2H8	PPIL3	Peptidyl-prolyl cis-trans isomerase-like 3 (PPIase) (EC 5.2.1.8) (Cyclophilin J) (CyPJ) (Cyclophilin-like protein PPIL3) (Rotamase PPIL3)	0.915152	10	0.000204472	0.466968	22	0.0284495	0.448184	0.273525
15548	58-A6QL63_BTBDB,X7508.Q9ULW8_PADI3	ABTB3	A6QL63	BTBDB	Ankyrin repeat and BTB/POZ domain-containing protein 3 (BTB/POZ domain-containing protein 11)	PADI3	Q9ULW8	PADI3	Protein-arginine deiminase type-3 (EC 3.5.3.15) (Peptidylarginine deiminase III) (Protein-arginine deiminase type III)	0.912088	14	5.5e-06	0.466403	23	0.0248732	0.445685	0.261815
263291	953-O95714_HERC2,X1384.P14543_NID1	HERC2	O95714	HERC2	E3 ubiquitin-protein ligase HERC2 (EC 2.3.2.26) (HECT domain and RCC1-like domain-containing protein 2) (HECT-type E3 ubiquitin transferase HERC2)	NID1	P14543	NID1	Nidogen-1 (NID-1) (Entactin)	0.928571	13	4.61e-06	0.484348	24	0.0164653	0.444224	0.254968
413671	1522-P19021_AMD,X6003.Q9BR39_JPH2	PAM	P19021	AMD	Peptidyl-glycine alpha-amidating monooxygenase (PAM) [Includes: Peptidylglycine alpha-hydroxylating monooxygenase (PHM) (EC 1.14.17.3); Peptidyl-alpha-hydroxyglycine alpha-amidating lyase (EC 4.3.2.5) (Peptidylamidoglycolate lyase) (PAL)]	JPH2	Q9BR39	JPH2	Junctophilin-2 (JP-2) (Junctophilin type 2) [Cleaved into: Junctophilin-2 N-terminal fragment (JP2NT)]	0.915152	10	0.000204472	0.472614	22	0.02634	0.442537	0.247066
13067	49-A6NHL2_TBAL3,X4215.Q70J99_UN13D	TUBAL3	A6NHL2	TBAL3	Tubulin alpha chain-like 3 (EC 3.6.5.-)	UNC13D	Q70J99	UN13D	Protein unc-13 homolog D (Munc13-4)	0.917857	15	1.42e-06	0.475862	30	0.0078615	0.441995	0.244525
454632	1685-P26038_MOES,X4123.Q6UW63_PLGT2	MSN	P26038	MOES	Moesin (Membrane-organizing extension spike protein)	POGLUT2	Q6UW63	PLGT2	Protein O-glucosyltransferase 2 (EC 2.4.1.-) (Endoplasmic reticulum resident protein 58) (ER protein 58) (ERp58) (KDEL motif-containing protein 1) (Protein O-xylosyltransferase POGLUT2) (EC 2.4.2.-)	0.913313	18	1.22e-07	0.471658	34	0.00486296	0.441655	0.242932
450291	1668-P25311_ZA2G,X2855.Q07654_TFF3	AZGP1	P25311	ZA2G	Zinc-alpha-2-glycoprotein (Zn-alpha-2-GP) (Zn-alpha-2-glycoprotein)	TFF3	Q07654	TFF3	Trefoil factor 3 (Intestinal trefoil factor) (hITF) (Polypeptide P1.B) (hP1.B)	0.918182	11	6.66e-05	0.476692	20	0.0335841	0.44149	0.242159
306492	1111-P05451_REG1A,X3926.Q6AWC2_WWC2	REG1A	P05451	REG1A	Lithostathine-1-alpha (Islet cells regeneration factor) (ICRF) (Islet of Langerhans regenerating protein) (REG) (Pancreatic stone protein) (PSP) (Pancreatic thread protein) (PTP) (Regenerating islet-derived protein 1-alpha) (REG-1-alpha) (Regenerating protein I alpha)	WWC2	Q6AWC2	WWC2	Protein WWC2 (BH-3-only member B) (WW domain-containing protein 2)	0.90303	10	0.000343612	0.462451	23	0.0262936	0.44058	0.237893
192617	693-O75478_TAD2A,X1963.P40261_NNMT	TADA2A	O75478	TAD2A	Transcriptional adapter 2-alpha (Transcriptional adapter 2-like) (ADA2-like protein)	NNMT	P40261	NNMT	Nicotinamide N-methyltransferase (EC 2.1.1.1)	1	6	0	0.560714	15	0.0296765	0.439286	0.23183
307011	1113-P05549_AP2A,X3213.Q14314_FGL2	TFAP2A	P05549	AP2A	Transcription factor AP-2-alpha (AP2-alpha) (AP-2 transcription factor) (Activating enhancer-binding protein 2-alpha) (Activator protein 2) (AP-2)	FGL2	Q14314	FGL2	Fibroleukin (Fibrinogen-like protein 2) (pT49)	0.915152	10	0.000204472	0.477132	22	0.0247437	0.43802	0.225898
796659	3364-Q15287_RNPS1,X5359.Q969J3_BORC5	RNPS1	Q15287	RNPS1	RNA-binding protein with serine-rich domain 1 (SR-related protein LDC2)	BORCS5	Q969J3	BORC5	BLOC-1-related complex subunit 5 (Loss of heterozygosity 12 chromosomal region 1) (Myristoylated lysosomal protein) (Myrlysin)	0.913313	18	1.22e-07	0.475325	34	0.00449838	0.437988	0.225749
182094	653-O75330_HMMR,X7902.Q9Y6A5_TACC3	HMMR	O75330	HMMR	Hyaluronan mediated motility receptor (Intracellular hyaluronic acid-binding protein) (Receptor for hyaluronan-mediated motility) (CD antigen CD168)	TACC3	Q9Y6A5	TACC3	Transforming acidic coiled-coil-containing protein 3 (ERIC-1)	0.907121	18	2.07e-07	0.469519	34	0.00508716	0.437602	0.22394
864009	3791-Q5T4D3_TMTC4,X3976.Q6L9W6_B4GN3	TMTC4	Q5T4D3	TMTC4	Protein O-mannosyl-transferase TMTC4 (EC 2.4.1.109) (Transmembrane and TPR repeat-containing protein 4)	B4GALNT3	Q6L9W6	B4GN3	Beta-1,4-N-acetylgalactosaminyltransferase 3 (B4GalNAcT3) (Beta4GalNAc-T3) (Beta4GalNAcT3) (EC 2.4.1.244) (Beta-1,4-N-acetylgalactosaminyltransferase III) (N-acetyl-beta-glucosaminyl-glycoprotein 4-beta-N-acetylgalactosaminyltransferase 2) (NGalNAc-T2)	0.942857	6	0.00480466	0.505494	13	0.0780333	0.437363	0.222818
147074	522-O60303_K0556,X1964.P40306_PSB10	KATNIP	O60303	K0556	Katanin-interacting protein	PSMB10	P40306	PSB10	Proteasome subunit beta type-10 (EC 3.4.25.1) (Low molecular mass protein 10) (Macropain subunit MECl-1) (Multicatalytic endopeptidase complex subunit MECl-1) (Proteasome MECl-1) (Proteasome subunit beta-2i)	0.909091	12	4.19e-05	0.474615	25	0.0165193	0.434476	0.209289
987328	4753-Q8N5C8_TAB3,X5499.Q96DR4_STAR4	TAB3	Q8N5C8	TAB3	TGF-beta-activated kinase 1 and MAP3K7-binding protein 3 (Mitogen-activated protein kinase kinase kinase 7-interacting protein 3) (NF-kappa-B-activating protein 1) (TAK1-binding protein 3) (TAB-3) (TGF-beta-activated kinase 1-binding protein 3)	STARD4	Q96DR4	STAR4	StAR-related lipid transfer protein 4 (START domain-containing protein 4) (StARD4)	0.916667	9	0.000506619	0.482707	20	0.0311052	0.43396	0.206873
894126	4009-Q6NYC8_PPR18,X6003.Q9BR39_JPH2	PPP1R18	Q6NYC8	PPR18	Phostensin (Protein phosphatase 1 F-actin cytoskeleton-targeting subunit) (Protein phosphatase 1 regulatory subunit 18)	JPH2	Q9BR39	JPH2	Junctophilin-2 (JP-2) (Junctophilin type 2) [Cleaved into: Junctophilin-2 N-terminal fragment (JP2NT)]	0.90303	10	0.000343612	0.469226	22	0.0275902	0.433804	0.206142
121022	432-O43504_LTOR5,X2855.Q07654_TFF3	LAMTOR5	O43504	LTOR5	Ragulator complex protein LAMTOR5 (Hepatitis B virus X-interacting protein) (HBV X-interacting protein) (HBX-interacting protein) (Late endosomal/lysosomal adaptor and MAPK and MTOR activator 5)	TFF3	Q07654	TFF3	Trefoil factor 3 (Intestinal trefoil factor) (hITF) (Polypeptide P1.B) (hP1.B)	0.918182	11	6.66e-05	0.485714	20	0.0299208	0.432468	0.19988
999271	4865-Q8NCA5_FA98A,X7616.Q9Y251_HPSE	FAM98A	Q8NCA5	FA98A	Protein FAM98A	HPSE	Q9Y251	HPSE	Heparanase (EC 3.2.1.166) (Endo-glucoronidase) (Heparanase-1) (Hpa1) [Cleaved into: Heparanase 8 kDa subunit; Heparanase 50 kDa subunit]	0.915152	10	0.000204472	0.482778	22	0.0228581	0.432373	0.199439
288948	1051-P02753_RET4,X4361.Q7Z7L1_SLN11	RBP4	P02753	RET4	Retinol-binding protein 4 (Plasma retinol-binding protein) (PRBP) (RBP) [Cleaved into: Plasma retinol-binding protein(1-182); Plasma retinol-binding protein(1-181); Plasma retinol-binding protein(1-179); Plasma retinol-binding protein(1-176)]	SLFN11	Q7Z7L1	SLN11	Schlafen family member 11 (EC 3.6.-.-)	0.942857	6	0.00480466	0.511765	16	0.0427235	0.431092	0.193436
57298	210-O14682_ENC1,X1051.P02753_RET4	ENC1	O14682	ENC1	Ectoderm-neural cortex protein 1 (ENC-1) (Kelch-like protein 37) (Nuclear matrix protein NRP/B) (p53-induced gene 10 protein)	RBP4	P02753	RET4	Retinol-binding protein 4 (Plasma retinol-binding protein) (PRBP) (RBP) [Cleaved into: Plasma retinol-binding protein(1-182); Plasma retinol-binding protein(1-181); Plasma retinol-binding protein(1-179); Plasma retinol-binding protein(1-176)]	0.927273	10	0.000112035	0.497459	22	0.0184892	0.429814	0.187444
558299	2130-P49189_AL9A1,X3242.Q14623_IHH	ALDH9A1	P49189	AL9A1	4-trimethylaminobutyraldehyde dehydrogenase (TMABA-DH) (TMABALDH) (EC 1.2.1.47) (Aldehyde dehydrogenase E3 isozyme) (Aldehyde dehydrogenase family 9 member A1) (EC 1.2.1.3) (Gamma-aminobutyraldehyde dehydrogenase) (EC 1.2.1.19) (R-aminobutyraldehyde dehydrogenase) [Cleaved into: 4-trimethylaminobutyraldehyde dehydrogenase, N-terminally processed]	IHH	Q14623	IHH	Indian hedgehog protein (IHH) (EC 3.1.-.-) (HHG-2) [Cleaved into: Indian hedgehog protein N-product]	0.902098	12	6e-05	0.473504	26	0.0145518	0.428594	0.181727
666810	2645-P78549_NTH,X4509.Q8IUS5_EPHX4	NTHL1	P78549	NTH	Endonuclease III-like protein 1 (hNTH1) (EC 3.2.2.-) (EC 4.2.99.18) (Bifunctional DNA N-glycosylase/DNA-(apurinic or apyrimidinic site) lyase) (DNA glycosylase/AP lyase)	EPHX4	Q8IUS5	EPHX4	Epoxide hydrolase 4 (EC 3.3.-.-) (Abhydrolase domain-containing protein 7) (Epoxide hydrolase-related protein)	1	6	0	0.571429	15	0.0260632	0.428571	0.181623
966337	4566-Q8IWT3_CUL9,X7473.Q9ULD9_ZN608	CUL9	Q8IWT3	CUL9	Cullin-9 (CUL-9) (UbcH7-associated protein 1) (p53-associated parkin-like cytoplasmic protein)	ZNF608	Q9ULD9	ZN608	Zinc finger protein 608 (Renal carcinoma antigen NY-REN-36)	0.902098	12	6e-05	0.473744	22	0.0259335	0.428354	0.180605
68278	245-O14907_TX1B3,X6003.Q9BR39_JPH2	TAX1BP3	O14907	TX1B3	Tax1-binding protein 3 (Glutaminase-interacting protein 3) (Tax interaction protein 1) (TIP-1) (Tax-interacting protein 1)	JPH2	Q9BR39	JPH2	Junctophilin-2 (JP-2) (Junctophilin type 2) [Cleaved into: Junctophilin-2 N-terminal fragment (JP2NT)]	0.915152	10	0.000204472	0.488425	22	0.0210893	0.426727	0.172979
385409	1412-P15313_VATB1,X6003.Q9BR39_JPH2	ATP6V1B1	P15313	VATB1	V-type proton ATPase subunit B, kidney isoform (V-ATPase subunit B 1) (Endomembrane proton pump 58 kDa subunit) (Vacuolar proton pump subunit B 1)	JPH2	Q9BR39	JPH2	Junctophilin-2 (JP-2) (Junctophilin type 2) [Cleaved into: Junctophilin-2 N-terminal fragment (JP2NT)]	0.928571	8	0.000862968	0.502256	20	0.0240247	0.426316	0.171053
96265	341-O15393_TMPS2,X3678.Q56VL3_OCAD2	TMPRSS2	O15393	TMPS2	Transmembrane protease serine 2 (EC 3.4.21.-) (Serine protease 10) [Cleaved into: Transmembrane protease serine 2 non-catalytic chain; Transmembrane protease serine 2 catalytic chain]	OCIAD2	Q56VL3	OCAD2	OCIA domain-containing protein 2 (Ovarian carcinoma immunoreactive antigen-like protein)	0.911765	16	8.82e-07	0.48607	32	0.0047944	0.425694	0.168141
84566	301-O15169_AXIN1,X6678.Q9HC44_GPBL1	AXIN1	O15169	AXIN1	Axin-1 (Axis inhibition protein 1) (hAxin)	GPBP1L1	Q9HC44	GPBL1	Vasculin-like protein 1 (GC-rich promoter-binding protein 1-like 1)	0.90303	10	0.000343612	0.478261	22	0.024357	0.424769	0.163807
659519	2606-P67809_YBOX1,X5543.Q96EY4_TMA16	YBX1	P67809	YBOX1	Y-box-binding protein 1 (YB-1) (CCAAT-binding transcription factor I subunit A) (CBF-A) (DNA-binding protein B) (DBPB) (Enhancer factor I subunit A) (EFI-A) (Nuclease-sensitive element-binding protein 1) (Y-box transcription factor)	TMA16	Q96EY4	TMA16	Translation machinery-associated protein 16	0.905057	18	2.46e-07	0.481131	34	0.00396932	0.423926	0.159855
324934	1178-P08138_TNR16,X7403.Q9UJX5_APC4	NGFR	P08138	TNR16	Tumor necrosis factor receptor superfamily member 16 (Gp80-LNGFR) (Low affinity neurotrophin receptor p75NTR) (Low-affinity nerve growth factor receptor) (NGF receptor) (p75 ICD) (CD antigen CD271)	ANAPC4	Q9UJX5	APC4	Anaphase-promoting complex subunit 4 (APC4) (Cyclosome subunit 4)	0.927273	10	0.000112035	0.506494	22	0.0161541	0.420779	0.145109
348825	1264-P10242_MYB,X2156.P49638_TTPA	MYB	P10242	MYB	Transcriptional activator Myb (Proto-oncogene c-Myb)	TTPA	P49638	TTPA	Alpha-tocopherol transfer protein (Alpha-TTP)	0.916667	9	0.000506619	0.498246	19	0.0299213	0.418421	0.134059
1066222	5560-Q96FL9_GLT14,X6832.Q9NRH1_YAE1	GALNT14	Q96FL9	GLT14	Polypeptide N-acetylgalactosaminyltransferase 14 (EC 2.4.1.41) (Polypeptide GalNAc transferase 14) (GalNAc-T14) (pp-GaNTase 14) (Protein-UDP acetylgalactosaminyltransferase 14) (UDP-GalNAc:polypeptide N-acetylgalactosaminyltransferase 14)	YAE1	Q9NRH1	YAE1	Protein YAE1 homolog (Yae1 domain-containing protein 1)	1	5	0	0.582143	15	0.0227937	0.417857	0.131416
844223	3660-Q53HC5_KLH26,X6950.Q9NVN3_RIC8B	KLHL26	Q53HC5	KLH26	Kelch-like protein 26	RIC8B	Q9NVN3	RIC8B	Synembryn-B (Brain synembryn) (hSyn) (Protein Ric-8B)	0.909091	12	4.19e-05	0.494071	23	0.0165641	0.41502	0.11812
620085	2429-P56545_CTBP2,X7616.Q9Y251_HPSE	CTBP2	P56545	CTBP2	C-terminal-binding protein 2 (CtBP2)	HPSE	Q9Y251	HPSE	Heparanase (EC 3.2.1.166) (Endo-glucoronidase) (Heparanase-1) (Hpa1) [Cleaved into: Heparanase 8 kDa subunit; Heparanase 50 kDa subunit]	0.915152	10	0.000204472	0.501976	22	0.0172898	0.413175	0.109477
823928	3531-Q17R98_ZN827,X6451.Q9H3Q1_BORG4	ZNF827	Q17R98	ZN827	Zinc finger protein 827	CDC42EP4	Q9H3Q1	BORG4	Cdc42 effector protein 4 (Binder of Rho GTPases 4)	0.909091	11	0.000105593	0.496241	20	0.0260515	0.41285	0.107954
666976	2645-P78549_NTH,X7212.Q9P2Y4_ZN219	NTHL1	P78549	NTH	Endonuclease III-like protein 1 (hNTH1) (EC 3.2.2.-) (EC 4.2.99.18) (Bifunctional DNA N-glycosylase/DNA-(apurinic or apyrimidinic site) lyase) (DNA glycosylase/AP lyase)	ZNF219	Q9P2Y4	ZN219	Zinc finger protein 219	0.928571	8	0.000862968	0.515789	19	0.0237918	0.412782	0.107634
889349	3976-Q6L9W6_B4GN3,X7372.Q9UIL8_PHF11	B4GALNT3	Q6L9W6	B4GN3	Beta-1,4-N-acetylgalactosaminyltransferase 3 (B4GalNAcT3) (Beta4GalNAc-T3) (Beta4GalNAcT3) (EC 2.4.1.244) (Beta-1,4-N-acetylgalactosaminyltransferase III) (N-acetyl-beta-glucosaminyl-glycoprotein 4-beta-N-acetylgalactosaminyltransferase 2) (NGalNAc-T2)	PHF11	Q9UIL8	PHF11	PHD finger protein 11 (BRCA1 C-terminus-associated protein) (Renal carcinoma antigen NY-REN-34)	0.9	9	0.000943062	0.487745	17	0.0470211	0.412255	0.105164
793192	3344-Q15131_CDK10,X4698.Q8N2S1_LTBP4	CDK10	Q15131	CDK10	Cyclin-dependent kinase 10 (EC 2.7.11.22) (Cell division protein kinase 10) (Serine/threonine-protein kinase PISSLRE)	LTBP4	Q8N2S1	LTBP4	Latent-transforming growth factor beta-binding protein 4 (LTBP-4)	0.963636	11	1.85e-06	0.551948	21	0.00948241	0.411688	0.102509
968042	4581-Q8IX15_HOMEZ,X5718.Q96M89_CC138	HOMEZ	Q8IX15	HOMEZ	Homeobox and leucine zipper protein Homez (Homeodomain leucine zipper-containing factor)	CCDC138	Q96M89	CC138	Coiled-coil domain-containing protein 138	0.904762	8	0.00200828	0.494324	18	0.0370441	0.410438	0.09665
689761	2753-Q01973_ROR1,X4215.Q70J99_UN13D	ROR1	Q01973	ROR1	Inactive tyrosine-protein kinase transmembrane receptor ROR1 (Neurotrophic tyrosine kinase, receptor-related 1)	UNC13D	Q70J99	UN13D	Protein unc-13 homolog D (Munc13-4)	0.93007	12	1.17e-05	0.52	26	0.00647043	0.41007	0.094925
1047440	5343-Q93075_TATD2,X7683.Q9Y2S6_TMA7	TATDN2	Q93075	TATD2	Putative deoxyribonuclease TATDN2 (EC 3.1.21.-)	TMA7	Q9Y2S6	TMA7	Translation machinery-associated protein 7 (Coiled-coil domain-containing protein 72)	0.914706	16	7.01e-07	0.505242	31	0.00374234	0.409464	0.092086
324915	1178-P08138_TNR16,X6833.Q9NRH2_SNRK	NGFR	P08138	TNR16	Tumor necrosis factor receptor superfamily member 16 (Gp80-LNGFR) (Low affinity neurotrophin receptor p75NTR) (Low-affinity nerve growth factor receptor) (NGF receptor) (p75 ICD) (CD antigen CD271)	SNRK	Q9NRH2	SNRK	SNF-related serine/threonine-protein kinase (EC 2.7.11.1) (SNF1-related kinase)	1	4	0	0.590909	11	0.0555756	0.409091	0.090338
709014	2855-Q07654_TFF3,X2939.Q12864_CAD17	TFF3	Q07654	TFF3	Trefoil factor 3 (Intestinal trefoil factor) (hITF) (Polypeptide P1.B) (hP1.B)	CDH17	Q12864	CAD17	Cadherin-17 (Intestinal peptide-associated transporter HPT-1) (Liver-intestine cadherin) (LI-cadherin)	0.918182	11	6.66e-05	0.509774	20	0.021669	0.408407	0.087135
1049495	5366-Q969R2_OSBP2,X7645.Q9Y2D9_ZN652	OSBP2	Q969R2	OSBP2	Oxysterol-binding protein 2 (Oxysterol-binding protein-related protein 4) (ORP-4) (OSBP-related protein 4)	ZNF652	Q9Y2D9	ZN652	Zinc finger protein 652	0.9	11	0.000159971	0.491729	20	0.0276582	0.408271	0.086494
570427	2185-P49888_ST1E1,X6486.Q9H4M9_EHD1	SULT1E1	P49888	ST1E1	Sulfotransferase 1E1 (ST1E1) (EC 2.8.2.4) (EST-1) (Estrogen sulfotransferase) (Sulfotransferase, estrogen-preferring)	EHD1	Q9H4M9	EHD1	EH domain-containing protein 1 (PAST homolog 1) (hPAST1) (Testilin)	0.9	16	2.05e-06	0.493768	32	0.00407864	0.406232	0.07694
316842	1149-P07339_CATD,X2644.P78545_ELF3	CTSD	P07339	CATD	Cathepsin D (EC 3.4.23.5) [Cleaved into: Cathepsin D light chain; Cathepsin D heavy chain]	ELF3	P78545	ELF3	ETS-related transcription factor Elf-3 (E74-like factor 3) (Epithelial-restricted with serine box) (Epithelium-restricted Ets protein ESX) (Epithelium-specific Ets transcription factor 1) (ESE-1)	0.913313	18	1.22e-07	0.50741	34	0.00219131	0.405902	0.075397
901140	4063-Q6PCB8_EMB,X7065.Q9NYJ8_TAB2	EMB	Q6PCB8	EMB	Embigin	TAB2	Q9NYJ8	TAB2	TGF-beta-activated kinase 1 and MAP3K7-binding protein 2 (Mitogen-activated protein kinase kinase kinase 7-interacting protein 2) (TAK1-binding protein 2) (TAB-2) (TGF-beta-activated kinase 1-binding protein 2)	0.90303	10	0.000343612	0.497403	21	0.0217759	0.405628	0.074109
785726	3297-Q14CZ7_FAKD3,X5092.Q8WU10_PYRD1	FASTKD3	Q14CZ7	FAKD3	FAST kinase domain-containing protein 3, mitochondrial	PYROXD1	Q8WU10	PYRD1	Pyridine nucleotide-disulfide oxidoreductase domain-containing protein 1 (EC 1.8.1.-)	1	4	0	0.595238	8	0.11953	0.404762	0.070052
1063706	5531-Q96EQ0_SGTB,X5560.Q96FL9_GLT14	SGTB	Q96EQ0	SGTB	Small glutamine-rich tetratricopeptide repeat-containing protein beta (Beta-SGT) (Small glutamine-rich protein with tetratricopeptide repeats 2)	GALNT14	Q96FL9	GLT14	Polypeptide N-acetylgalactosaminyltransferase 14 (EC 2.4.1.41) (Polypeptide GalNAc transferase 14) (GalNAc-T14) (pp-GaNTase 14) (Protein-UDP acetylgalactosaminyltransferase 14) (UDP-GalNAc:polypeptide N-acetylgalactosaminyltransferase 14)	0.942857	6	0.00480466	0.538462	14	0.0469762	0.404396	0.068336
783146	3280-Q14865_ARI5B,X4138.Q6UXG2_K1324	ARID5B	Q14865	ARI5B	AT-rich interactive domain-containing protein 5B (ARID domain-containing protein 5B) (MRF1-like protein) (Modulator recognition factor 2) (MRF-2)	ELAPOR1	Q6UXG2	K1324	Endosome/lysosome-associated apoptosis and autophagy regulator 1 (Estrogen-induced gene 121 protein)	0.931889	18	1.88e-08	0.527578	34	0.00134407	0.40431	0.067936
486188	1818-P31629_ZEP2,X6986.Q9NWM8_FKB14	HIVEP2	P31629	ZEP2	Transcription factor HIVEP2 (Human immunodeficiency virus type I enhancer-binding protein 2) (HIV-EP2) (MHC-binding protein 2) (MBP-2)	FKBP14	Q9NWM8	FKB14	Peptidyl-prolyl cis-trans isomerase FKBP14 (PPIase FKBP14) (EC 5.2.1.8) (22 kDa FK506-binding protein) (22 kDa FKBP) (FKBP-22) (FK506-binding protein 14) (FKBP-14) (Rotamase)	0.913313	18	1.22e-07	0.510772	34	0.00202403	0.402541	0.059646
100315	354-O15479_MAGB2,X5757.Q96P11_NSUN5	MAGEB2	O15479	MAGB2	Melanoma-associated antigen B2 (Cancer/testis antigen 3.2) (CT3.2) (DSS-AHC critical interval MAGE superfamily 6) (DAM6) (MAGE XP-2 antigen) (MAGE-B2 antigen)	NSUN5	Q96P11	NSUN5	28S rRNA (cytosine-C(5))-methyltransferase (EC 2.1.1.-) (NOL1-related protein) (NOL1R) (NOL1/NOP2/Sun domain family member 5) (Williams-Beuren syndrome chromosomal region 20A protein)	0.902993	18	2.9e-07	0.50191	34	0.00249111	0.401083	0.052813
492602	1845-P32926_DSG3,X6767.Q9NPR2_SEM4B	DSG3	P32926	DSG3	Desmoglein-3 (130 kDa pemphigus vulgaris antigen) (PVA) (Cadherin family member 6)	SEMA4B	Q9NPR2	SEM4B	Semaphorin-4B (Semaphorin-C)	0.927273	11	3.97e-05	0.526316	20	0.0171307	0.400957	0.052222
395009	1450-P16591_FER,X4420.Q86V87_F16B2	FER	P16591	FER	Tyrosine-protein kinase Fer (EC 2.7.10.2) (Feline encephalitis virus-related kinase FER) (Fujinami poultry sarcoma/Feline sarcoma-related protein Fer) (Proto-oncogene c-Fer) (Tyrosine kinase 3) (p94-Fer)	FHIP2B	Q86V87	F16B2	FHF complex subunit HOOK interacting protein 2B (FHIP2B) (Retinoic acid-induced protein 16)	0.915377	18	1.01e-07	0.516272	34	0.00177428	0.399105	0.043543
74478	266-O15015_ZN646,X1654.P24557_THAS	ZNF646	O15015	ZN646	Zinc finger protein 646	TBXAS1	P24557	THAS	Thromboxane-A synthase (TXA synthase) (TXS) (EC 5.3.99.5) (Cytochrome P450 5A1) (Hydroperoxy icosatetraenoate dehydratase) (EC 4.2.1.152)	0.909091	11	0.000105593	0.511278	20	0.0212206	0.397813	0.037489
1164295	7372-Q9UIL8_PHF11,X7936.Q9Y6Q1_CAN6	PHF11	Q9UIL8	PHF11	PHD finger protein 11 (BRCA1 C-terminus-associated protein) (Renal carcinoma antigen NY-REN-34)	CAPN6	Q9Y6Q1	CAN6	Calpain-6 (Calpain-like protease X-linked) (Calpamodulin) (CalpM)	0.902098	12	6e-05	0.506087	24	0.0116275	0.396011	0.029045
320318	1161-P07858_CATB,X3242.Q14623_IHH	CTSB	P07858	CATB	Cathepsin B (EC 3.4.22.1) (APP secretase) (APPS) (Cathepsin B1) [Cleaved into: Cathepsin B light chain; Cathepsin B heavy chain]	IHH	Q14623	IHH	Indian hedgehog protein (IHH) (EC 3.1.-.-) (HHG-2) [Cleaved into: Indian hedgehog protein N-product]	0.902098	12	6e-05	0.50906	26	0.00790854	0.393038	0.015115
52776	193-O14578_CTRO,X7645.Q9Y2D9_ZN652	CIT	O14578	CTRO	Citron Rho-interacting kinase (CRIK) (EC 2.7.11.1) (Serine/threonine-protein kinase 21)	ZNF652	Q9Y2D9	ZN652	Zinc finger protein 652	0.902098	12	6e-05	0.509881	23	0.0129372	0.392216	0.011265
502765	1886-P35354_PGH2,X6123.Q9BV29_CCD32	PTGS2	P35354	PGH2	Prostaglandin G/H synthase 2 (EC 1.14.99.1) (Cyclooxygenase-2) (COX-2) (PHS II) (Prostaglandin H2 synthase 2) (PGH synthase 2) (PGHS-2) (Prostaglandin-endoperoxide synthase 2)	CCDC32	Q9BV29	CCD32	Coiled-coil domain-containing protein 32	0.921569	18	5.62e-08	0.530634	34	0.00124482	0.390935	0.005258
610711	2389-P55084_ECHB,X3242.Q14623_IHH	HADHB	P55084	ECHB	Trifunctional enzyme subunit beta, mitochondrial (TP-beta) [Includes: 3-ketoacyl-CoA thiolase (EC 2.3.1.155) (EC 2.3.1.16) (Acetyl-CoA acyltransferase) (Beta-ketothiolase)]	IHH	Q14623	IHH	Indian hedgehog protein (IHH) (EC 3.1.-.-) (HHG-2) [Cleaved into: Indian hedgehog protein N-product]	0.916084	12	2.84e-05	0.526154	26	0.00576301	0.38993	0.000551
837830	3622-Q4KMQ1_TPRN,X5867.Q96TA1_NIBA2	TPRN	Q4KMQ1	TPRN	Taperin	NIBAN2	Q96TA1	NIBA2	Protein Niban 2 (Meg-3) (Melanoma invasion by ERK) (MINERVA) (Niban-like protein 1) (Protein FAM129B)	0.900929	18	3.41e-07	0.512605	34	0.00193757	0.388324	-0.00698
673018	2670-P82970_HMGN5,X3051.Q13415_ORC1	HMGN5	P82970	HMGN5	High mobility group nucleosome-binding domain-containing protein 5 (Nucleosome-binding protein 1)	ORC1	Q13415	ORC1	Origin recognition complex subunit 1 (Replication control protein 1)	0.917441	18	8.36e-08	0.529717	34	0.00127389	0.387723	-0.00979
687274	2740-Q01629_IFM2,X6552.Q9H7U1_CCSE2	IFITM2	Q01629	IFM2	Interferon-induced transmembrane protein 2 (Dispanin subfamily A member 2c) (DSPA2c) (Interferon-inducible protein 1-8D)	CCSER2	Q9H7U1	CCSE2	Serine-rich coiled-coil domain-containing protein 2 (Coiled-coil serine-rich protein 2) (Protein GCAP14 homolog)	0.927273	11	3.97e-05	0.53985	20	0.0140136	0.387423	-0.0112
447052	1654-P24557_THAS,X3633.Q4W5G0_TIGD2	TBXAS1	P24557	THAS	Thromboxane-A synthase (TXA synthase) (TXS) (EC 5.3.99.5) (Cytochrome P450 5A1) (Hydroperoxy icosatetraenoate dehydratase) (EC 4.2.1.152)	TIGD2	Q4W5G0	TIGD2	Tigger transposable element-derived protein 2	0.918182	11	6.66e-05	0.530827	20	0.0160354	0.387355	-0.01152
966693	4569-Q8IWU5_SULF2,X6357.Q9H0J9_PAR12	SULF2	Q8IWU5	SULF2	Extracellular sulfatase Sulf-2 (hSulf-2) (EC 3.1.6.-)	PARP12	Q9H0J9	PAR12	Protein mono-ADP-ribosyltransferase PARP12 (EC 2.4.2.-) (ADP-ribosyltransferase diphtheria toxin-like 12) (ARTD12) (Poly [ADP-ribose] polymerase 12) (PARP-12) (Zinc finger CCCH domain-containing protein 1)	0.90303	10	0.000343612	0.51579	20	0.0199198	0.387241	-0.01205
494833	1855-P33991_MCM4,X4677.Q8N163_CCAR2	MCM4	P33991	MCM4	DNA replication licensing factor MCM4 (EC 3.6.4.12) (CDC21 homolog) (P1-CDC21)	CCAR2	Q8N163	CCAR2	Cell cycle and apoptosis regulator protein 2 (Cell division cycle and apoptosis regulator protein 2) (DBIRD complex subunit KIAA1967) (Deleted in breast cancer gene 1 protein) (DBC-1) (DBC.1) (NET35) (p30 DBC)	0.900929	18	3.41e-07	0.514133	34	0.001868	0.386796	-0.01414
417405	1536-P19532_TFE3,X5304.Q92871_PMM1	TFE3	P19532	TFE3	Transcription factor E3 (Class E basic helix-loop-helix protein 33) (bHLHe33)	PMM1	Q92871	PMM1	Phosphomannomutase 1 (PMM 1) (EC 5.4.2.8) (PMMH-22)	0.928571	13	4.61e-06	0.54188	26	0.00424485	0.386691	-0.01463
1066616	5564-Q96FS4_SIPA1,X6676.Q9HC36_MRM3	SIPA1	Q96FS4	SIPA1	Signal-induced proliferation-associated protein 1 (Sipa-1) (GTPase-activating protein Spa-1) (p130 SPA-1)	MRM3	Q9HC36	MRM3	rRNA methyltransferase 3, mitochondrial (EC 2.1.1.-) (16S rRNA (guanosine(1370)-2'-O)-methyltransferase) (16S rRNA [Gm1370] 2'-O-methyltransferase) (RNA methyltransferase-like protein 1)	0.916084	12	2.84e-05	0.530632	23	0.00918929	0.385452	-0.02044
1158302	7141-Q9P0L2_MARK1,X7459.Q9UL33_TPC2L	MARK1	Q9P0L2	MARK1	Serine/threonine-protein kinase MARK1 (EC 2.7.11.1) (EC 2.7.11.26) (MAP/microtubule affinity-regulating kinase 1) (PAR1 homolog c) (Par-1c) (Par1c)	TRAPPC2L	Q9UL33	TPC2L	Trafficking protein particle complex subunit 2-like protein	0.916667	9	0.000506619	0.531476	18	0.0232163	0.385191	-0.02166
709019	2855-Q07654_TFF3,X3188.Q14165_MLEC	TFF3	Q07654	TFF3	Trefoil factor 3 (Intestinal trefoil factor) (hITF) (Polypeptide P1.B) (hP1.B)	MLEC	Q14165	MLEC	Malectin	0.918182	11	6.66e-05	0.533835	20	0.015337	0.384347	-0.02561
527865	2001-P42224_STAT1,X2873.Q08357_S20A2	STAT1	P42224	STAT1	Signal transducer and activator of transcription 1-alpha/beta (Transcription factor ISGF-3 components p91/p84)	SLC20A2	Q08357	S20A2	Sodium-dependent phosphate transporter 2 (Gibbon ape leukemia virus receptor 2) (GLVR-2) (Phosphate transporter 2) (PiT-2) (Pit2) (hPit2) (Solute carrier family 20 member 2)	0.921569	18	5.62e-08	0.537357	34	0.00104883	0.384212	-0.02624
308862	1120-P06241_FYN,X7757.Q9Y3L5_RAP2C	FYN	P06241	FYN	Tyrosine-protein kinase Fyn (EC 2.7.10.2) (Proto-oncogene Syn) (Proto-oncogene c-Fyn) (Src-like kinase) (SLK) (p59-Fyn)	RAP2C	Q9Y3L5	RAP2C	Ras-related protein Rap-2c (EC 3.6.5.2)	0.9	15	4.87e-06	0.516352	30	0.00348788	0.383648	-0.02888
976092	4657-Q8IZQ1_WDFY3,X5758.Q96P16_RPR1A	WDFY3	Q8IZQ1	WDFY3	WD repeat and FYVE domain-containing protein 3 (Autophagy-linked FYVE protein) (Alfy)	RPRD1A	Q96P16	RPR1A	Regulation of nuclear pre-mRNA domain-containing protein 1A (Cyclin-dependent kinase inhibitor 2B-related protein) (p15INK4B-related protein)	0.900929	18	3.41e-07	0.517494	34	0.0017226	0.383435	-0.02989
192806	693-O75478_TAD2A,X7836.Q9Y5B6_PAXB1	TADA2A	O75478	TAD2A	Transcriptional adapter 2-alpha (Transcriptional adapter 2-like) (ADA2-like protein)	PAXBP1	Q9Y5B6	PAXB1	PAX3- and PAX7-binding protein 1 (GC-rich sequence DNA-binding factor 1)	0.945454	11	1.12e-05	0.562253	23	0.0052304	0.383202	-0.03098
1089197	5826-Q96RU8_TRIB1,X7183.Q9P2D3_HTR5B	TRIB1	Q96RU8	TRIB1	Tribbles homolog 1 (TRB-1) (G-protein-coupled receptor-induced gene 2 protein) (GIG-2) (SKIP1)	HEATR5B	Q9P2D3	HTR5B	HEAT repeat-containing protein 5B	0.927273	11	3.97e-05	0.544361	20	0.0130826	0.382912	-0.03234
47405	178-O00748_EST2,X1703.P27216_ANX13	CES2	O00748	EST2	Cocaine esterase (EC 3.1.1.84) (Carboxylesterase 2) (CE-2) (hCE-2) (EC 3.1.1.1) (Methylumbelliferyl-acetate deacetylase 2) (EC 3.1.1.56)	ANXA13	P27216	ANX13	Annexin A13 (Annexin XIII) (Annexin-13) (Intestine-specific annexin) (ISA)	0.915377	18	1.01e-07	0.532468	34	0.00118841	0.382909	-0.03235
218701	786-O76070_SYUG,X5885.Q99496_RING2	SNCG	O76070	SYUG	Gamma-synuclein (Breast cancer-specific gene 1 protein) (Persyn) (Synoretin) (SR)	RNF2	Q99496	RING2	E3 ubiquitin-protein ligase RING2 (EC 2.3.2.27) (Huntingtin-interacting protein 2-interacting protein 3) (HIP2-interacting protein 3) (Protein DinG) (RING finger protein 1B) (RING1b) (RING finger protein 2) (RING finger protein BAP-1) (RING-type E3 ubiquitin transferase RING2)	0.902993	18	2.9e-07	0.520244	34	0.00161109	0.382748	-0.0331
121845	434-O43520_AT8B1,X1102.P05166_PCCB	ATP8B1	O43520	AT8B1	Phospholipid-transporting ATPase IC (EC 7.6.2.1) (ATPase class I type 8B member 1) (Familial intrahepatic cholestasis type 1) (P4-ATPase flippase complex alpha subunit ATP8B1)	PCCB	P05166	PCCB	Propionyl-CoA carboxylase beta chain, mitochondrial (PCCase subunit beta) (EC 6.4.1.3) (Propanoyl-CoA:carbon dioxide ligase subunit beta)	0.905057	18	2.46e-07	0.522383	34	0.00152879	0.382673	-0.03345
801867	3397-Q15468_STIL,X4220.Q71F23_CENPU	STIL	Q15468	STIL	SCL-interrupting locus protein (TAL-1-interrupting locus protein)	CENPU	Q71F23	CENPU	Centromere protein U (CENP-U) (Centromere protein of 50 kDa) (CENP-50) (Interphase centromere complex protein 24) (KSHV latent nuclear antigen-interacting protein 1) (MLF1-interacting protein) (Polo-box-interacting protein 1)	0.931889	18	1.88e-08	0.54958	34	0.000761046	0.382309	-0.03516
288976	1051-P02753_RET4,X5052.Q8TE76_MORC4	RBP4	P02753	RET4	Retinol-binding protein 4 (Plasma retinol-binding protein) (PRBP) (RBP) [Cleaved into: Plasma retinol-binding protein(1-182); Plasma retinol-binding protein(1-181); Plasma retinol-binding protein(1-179); Plasma retinol-binding protein(1-176)]	MORC4	Q8TE76	MORC4	MORC family CW-type zinc finger protein 4 (Zinc finger CW-type coiled-coil domain protein 2) (Zinc finger CW-type domain protein 4)	0.90303	10	0.000343612	0.521174	22	0.0128731	0.381856	-0.03728
876347	3877-Q5XKP0_MIC13,X6395.Q9H1H9_KI13A	MICOS13	Q5XKP0	MIC13	MICOS complex subunit MIC13 (Protein P117)	KIF13A	Q9H1H9	KI13A	Kinesin-like protein KIF13A (Kinesin-like protein RBKIN)	0.900929	18	3.41e-07	0.520244	34	0.00161109	0.380684	-0.04277
709124	2855-Q07654_TFF3,X4528.Q8IVH4_MMAA	TFF3	Q07654	TFF3	Trefoil factor 3 (Intestinal trefoil factor) (hITF) (Polypeptide P1.B) (hP1.B)	MMAA	Q8IVH4	MMAA	Methylmalonic aciduria type A protein, mitochondrial (EC 3.6.-.-)	0.963636	11	1.85e-06	0.583459	20	0.00692269	0.380178	-0.04515
823857	3530-Q17R89_RHG44,X7616.Q9Y251_HPSE	ARHGAP44	Q17R89	RHG44	Rho GTPase-activating protein 44 (NPC-A-10) (Rho-type GTPase-activating protein RICH2) (RhoGAP interacting with CIP4 homologs protein 2) (RICH-2)	HPSE	Q9Y251	HPSE	Heparanase (EC 3.2.1.166) (Endo-glucoronidase) (Heparanase-1) (Hpa1) [Cleaved into: Heparanase 8 kDa subunit; Heparanase 50 kDa subunit]	0.975758	10	1.47e-06	0.595709	22	0.00344072	0.380049	-0.04575
170127	611-O75056_SDC3,X1372.P13994_CC130	SDC3	O75056	SDC3	Syndecan-3 (SYND3)	YJU2B	P13994	CC130	Probable splicing factor YJU2B (Coiled-coil domain-containing protein 130)	0.903297	14	9.56e-06	0.525031	27	0.00492444	0.378266	-0.05411
341340	1236-P09913_IFIT2,X1832.P32004_L1CAM	IFIT2	P09913	IFIT2	Interferon-induced protein with tetratricopeptide repeats 2 (IFIT-2) (ISG-54 K) (Interferon-induced 54 kDa protein) (IFI-54K) (P54)	L1CAM	P32004	L1CAM	Neural cell adhesion molecule L1 (N-CAM-L1) (NCAM-L1) (CD antigen CD171)	0.925697	18	3.69e-08	0.547441	34	0.000805695	0.378256	-0.05415
901108	4063-Q6PCB8_EMB,X5881.Q99470_SDF2	EMB	Q6PCB8	EMB	Embigin	SDF2	Q99470	SDF2	Stromal cell-derived factor 2 (SDF-2)	0.90303	10	0.000343612	0.525974	21	0.0143225	0.377056	-0.05978
50534	188-O14530_TXND9,X1854.P33981_TTK	TXNDC9	O14530	TXND9	Thioredoxin domain-containing protein 9 (ATP-binding protein associated with cell differentiation) (Protein 1-4)	TTK	P33981	TTK	Dual specificity protein kinase TTK (EC 2.7.12.1) (Phosphotyrosine picked threonine-protein kinase) (PYT)	0.909185	18	1.74e-07	0.533995	34	0.00114314	0.375189	-0.06852
295053	1075-P04183_KITH,X6680.Q9HC62_SENP2	TK1	P04183	KITH	Thymidine kinase, cytosolic (EC 2.7.1.21)	SENP2	Q9HC62	SENP2	Sentrin-specific protease 2 (EC 3.4.22.-) (Axam2) (SMT3-specific isopeptidase 2) (Smt3ip2) (Sentrin/SUMO-specific protease SENP2)	0.902993	18	2.9e-07	0.528189	34	0.00132368	0.374803	-0.07033
345550	1250-P0CG30_GSTT2,X3666.Q53RE8_ANR39	GSTT2B	P0CG30	GSTT2	Glutathione S-transferase theta-2B (EC 2.5.1.18) (Glutathione S-transferase theta-2) (GST class-theta-2)	ANKRD39	Q53RE8	ANR39	Ankyrin repeat domain-containing protein 39	0.923077	12	1.86e-05	0.548419	23	0.00673731	0.374658	-0.07101
892981	4001-Q6NWY9_PR40B,X4698.Q8N2S1_LTBP4	PRPF40B	Q6NWY9	PR40B	Pre-mRNA-processing factor 40 homolog B (Huntingtin yeast partner C) (Huntingtin-interacting protein C)	LTBP4	Q8N2S1	LTBP4	Latent-transforming growth factor beta-binding protein 4 (LTBP-4)	0.918182	11	6.66e-05	0.544156	21	0.0107672	0.374026	-0.07397
666804	2645-P78549_NTH,X4395.Q86UB9_TM135	NTHL1	P78549	NTH	Endonuclease III-like protein 1 (hNTH1) (EC 3.2.2.-) (EC 4.2.99.18) (Bifunctional DNA N-glycosylase/DNA-(apurinic or apyrimidinic site) lyase) (DNA glycosylase/AP lyase)	TMEM135	Q86UB9	TM135	Transmembrane protein 135 (Peroxisomal membrane protein 52) (PMP52)	0.915152	10	0.000204472	0.541502	22	0.00924671	0.37365	-0.07574
57164	209-O14681_EI24,X3498.Q16670_ZSC26	EI24	O14681	EI24	Etoposide-induced protein 2.4 homolog (p53-induced gene 8 protein)	ZSCAN26	Q16670	ZSC26	Zinc finger and SCAN domain-containing protein 26 (Protein SRE-ZBP) (Zinc finger protein 187)	0.965035	12	3.88e-07	0.591538	25	0.00184282	0.373497	-0.07646
623160	2445-P57735_RAB25,X6409.Q9H246_CA021	RAB25	P57735	RAB25	Ras-related protein Rab-25 (CATX-8)	C1orf21	Q9H246	CA021	Uncharacterized protein C1orf21 (Cell proliferation-inducing gene 13 protein)	0.900929	18	3.41e-07	0.528801	34	0.00130356	0.372128	-0.08287
899799	4051-Q6P6B1_ERIC5,X6655.Q9HBD1_RC3H2	ERICH5	Q6P6B1	ERIC5	Glutamate-rich protein 5	RC3H2	Q9HBD1	RC3H2	Roquin-2 (EC 2.3.2.27) (Membrane-associated nucleic acid-binding protein) (RING finger and CCCH-type zinc finger domain-containing protein 2) (RING finger protein 164) (RING-type E3 ubiquitin transferase Roquin-2)	0.904762	8	0.00200828	0.533333	19	0.0186967	0.371429	-0.08615
873362	3858-Q5VWG9_TAF3,X5531.Q96EQ0_SGTB	TAF3	Q5VWG9	TAF3	Transcription initiation factor TFIID subunit 3 (140 kDa TATA box-binding protein-associated factor) (TBP-associated factor 3) (Transcription initiation factor TFIID 140 kDa subunit) (TAF(II)140) (TAF140) (TAFII-140) (TAFII140)	SGTB	Q96EQ0	SGTB	Small glutamine-rich tetratricopeptide repeat-containing protein beta (Beta-SGT) (Small glutamine-rich protein with tetratricopeptide repeats 2)	0.903297	14	9.56e-06	0.532357	27	0.00425713	0.37094	-0.08843
994292	4820-Q8N9Z2_CC71L,X7055.Q9NY64_GTR8	CCDC71L	Q8N9Z2	CC71L	Coiled-coil domain-containing protein 71L	SLC2A8	Q9NY64	GTR8	Solute carrier family 2, facilitated glucose transporter member 8 (Glucose transporter type 8) (GLUT-8) (Glucose transporter type X1)	0.902993	18	2.9e-07	0.532162	34	0.00119765	0.370831	-0.08895
587199	2268-P51795_CLCN5,X7500.Q9ULT6_ZNRF3	CLCN5	P51795	CLCN5	H(+)/Cl(-) exchange transporter 5 (Chloride channel protein 5) (ClC-5) (Chloride transporter ClC-5)	ZNRF3	Q9ULT6	ZNRF3	E3 ubiquitin-protein ligase ZNRF3 (EC 2.3.2.27) (RING finger protein 203) (RING-type E3 ubiquitin transferase ZNRF3) (Zinc/RING finger protein 3)	0.933333	9	0.0002359	0.563725	17	0.018435	0.369608	-0.09468
334311	1211-P09210_GSTA2,X3936.Q6DN12_MCTP2	GSTA2	P09210	GSTA2	Glutathione S-transferase A2 (EC 2.5.1.18) (GST HA subunit 2) (GST class-alpha member 2) (GST-gamma) (GSTA2-2) (GTH2)	MCTP2	Q6DN12	MCTP2	Multiple C2 and transmembrane domain-containing protein 2	0.954546	11	4.99e-06	0.584962	20	0.00674477	0.369583	-0.09479
377471	1380-P14324_FPPS,X4700.Q8N302_AGGF1	FDPS	P14324	FPPS	Farnesyl pyrophosphate synthase (FPP synthase) (FPS) (EC 2.5.1.10) ((2E,6E)-farnesyl diphosphate synthase) (Dimethylallyltranstransferase) (EC 2.5.1.1) (Farnesyl diphosphate synthase) (Geranyltranstransferase)	AGGF1	Q8N302	AGGF1	Angiogenic factor with G patch and FHA domains 1 (Angiogenic factor VG5Q) (hVG5Q) (G patch domain-containing protein 7) (Vasculogenesis gene on 5q protein)	0.918182	11	6.66e-05	0.548872	20	0.0122022	0.36931	-0.09608
732358	2988-Q13123_RED,X6161.Q9BW62_KATL1	IK	Q13123	RED	Protein Red (Cytokine IK) (IK factor) (Protein RER)	KATNAL1	Q9BW62	KATL1	Katanin p60 ATPase-containing subunit A-like 1 (Katanin p60 subunit A-like 1) (EC 5.6.1.1) (p60 katanin-like 1)	0.953571	15	3.79e-08	0.584957	26	0.00169675	0.368614	-0.09933
473279	1765-P29966_MARCS,X7910.Q9Y6E0_STK24	MARCKS	P29966	MARCS	Myristoylated alanine-rich C-kinase substrate (MARCKS) (Protein kinase C substrate, 80 kDa protein, light chain) (80K-L protein) (PKCSL)	STK24	Q9Y6E0	STK24	Serine/threonine-protein kinase 24 (EC 2.7.11.1) (Mammalian STE20-like protein kinase 3) (MST-3) (STE20-like kinase MST3) [Cleaved into: Serine/threonine-protein kinase 24 36 kDa subunit (Mammalian STE20-like protein kinase 3 N-terminal) (MST3/N); Serine/threonine-protein kinase 24 12 kDa subunit (Mammalian STE20-like protein kinase 3 C-terminal) (MST3/C)]	0.902993	18	2.9e-07	0.535218	34	0.00110801	0.367775	-0.10327
763698	3164-Q14112_NID2,X6392.Q9H1D9_RPC6	NID2	Q14112	NID2	Nidogen-2 (NID-2) (Osteonidogen)	POLR3F	Q9H1D9	RPC6	DNA-directed RNA polymerase III subunit RPC6 (RNA polymerase III subunit C6) (DNA-directed RNA polymerase III subunit F) (RNA polymerase III 39 kDa subunit) (RPC39)	0.954546	11	4.99e-06	0.590977	20	0.00607015	0.363568	-0.12298
495650	1859-P34741_SDC2,X2694.P98095_FBLN2	SDC2	P34741	SDC2	Syndecan-2 (SYND2) (Fibroglycan) (Heparan sulfate proteoglycan core protein) (HSPG) (CD antigen CD362)	FBLN2	P98095	FBLN2	Fibulin-2 (FIBL-2)	0.9	9	0.000943062	0.536842	20	0.0146633	0.363158	-0.1249
670145	2660-P82664_RT10,X5644.Q96IU4_ABHEB	MRPS10	P82664	RT10	28S ribosomal protein S10, mitochondrial (MRP-S10) (S10mt) (Mitochondrial small ribosomal subunit protein uS10m)	ABHD14B	Q96IU4	ABHEB	Putative protein-lysine deacylase ABHD14B (EC 2.3.1.-) (Alpha/beta hydrolase domain-containing protein 14B) (Abhydrolase domain-containing protein 14B) (CCG1-interacting factor B)	0.909185	18	1.74e-07	0.548052	34	0.000792708	0.361133	-0.13439
939135	4353-Q7Z7C8_TAF8,X5944.Q99832_TCPH	TAF8	Q7Z7C8	TAF8	Transcription initiation factor TFIID subunit 8 (Protein taube nuss) (TBP-associated factor 43 kDa) (TBP-associated factor 8) (Transcription initiation factor TFIID 43 kDa subunit) (TAFII-43) (TAFII43) (hTAFII43)	CCT7	Q99832	TCPH	T-complex protein 1 subunit eta (TCP-1-eta) (CCT-eta) (HIV-1 Nef-interacting protein) [Cleaved into: T-complex protein 1 subunit eta, N-terminally processed]	0.902941	16	1.68e-06	0.543952	31	0.00156135	0.35899	-0.14443
159574	569-O60683_PEX10,X5001.Q8TBK2_SETD6	PEX10	O60683	PEX10	Peroxisome biogenesis factor 10 (Peroxin-10) (Peroxisomal biogenesis factor 10) (Peroxisome assembly protein 10) (RING finger protein 69)	SETD6	Q8TBK2	SETD6	N-lysine methyltransferase SETD6 (EC 2.1.1.-) (SET domain-containing protein 6)	0.97619	8	3.31e-05	0.618163	18	0.00625176	0.358027	-0.14894
609600	2383-P55058_PLTP,X6971.Q9NW15_ANO10	PLTP	P55058	PLTP	Phospholipid transfer protein (Lipid transfer protein II)	ANO10	Q9NW15	ANO10	Anoctamin-10 (Transmembrane protein 16K)	0.910714	15	2.4e-06	0.552821	26	0.00340167	0.357894	-0.14957
695938	2784-Q03113_GNA12,X6999.Q9NWX5_ASB6	GNA12	Q03113	GNA12	Guanine nucleotide-binding protein subunit alpha-12 (G alpha-12) (G-protein subunit alpha-12)	ASB6	Q9NWX5	ASB6	Ankyrin repeat and SOCS box protein 6 (ASB-6)	0.954592	18	7.88e-10	0.597555	34	0.000190338	0.357037	-0.15358
48790	181-O00762_UBE2C,X5024.Q8TCT9_HM13	UBE2C	O00762	UBE2C	Ubiquitin-conjugating enzyme E2 C (EC 2.3.2.23) ((E3-independent) E2 ubiquitin-conjugating enzyme C) (EC 2.3.2.24) (E2 ubiquitin-conjugating enzyme C) (UbcH10) (Ubiquitin carrier protein C) (Ubiquitin-protein ligase C)	HM13	Q8TCT9	HM13	Minor histocompatibility antigen H13 (EC 3.4.23.-) (Intramembrane protease 1) (IMP-1) (IMPAS-1) (hIMP1) (Presenilin-like protein 3) (Signal peptide peptidase)	0.921569	18	5.62e-08	0.56547	34	0.000492257	0.356099	-0.15798
722407	2932-Q12834_CDC20,X4220.Q71F23_CENPU	CDC20	Q12834	CDC20	Cell division cycle protein 20 homolog (p55CDC)	CENPU	Q71F23	CENPU	Centromere protein U (CENP-U) (Centromere protein of 50 kDa) (CENP-50) (Interphase centromere complex protein 24) (KSHV latent nuclear antigen-interacting protein 1) (MLF1-interacting protein) (Polo-box-interacting protein 1)	0.925697	18	3.69e-08	0.571276	34	0.000417491	0.354421	-0.16584
374332	1368-P13861_KAP2,X2855.Q07654_TFF3	PRKAR2A	P13861	KAP2	cAMP-dependent protein kinase type II-alpha regulatory subunit	TFF3	Q07654	TFF3	Trefoil factor 3 (Intestinal trefoil factor) (hITF) (Polypeptide P1.B) (hP1.B)	0.918182	11	6.66e-05	0.56391	20	0.00960697	0.354272	-0.16654
813648	3468-Q16513_PKN2,X4959.Q8NHY0_B4GN2	PKN2	Q16513	PKN2	Serine/threonine-protein kinase N2 (EC 2.7.11.13) (PKN gamma) (Protein kinase C-like 2) (Protein-kinase C-related kinase 2)	B4GALNT2	Q8NHY0	B4GN2	Beta-1,4 N-acetylgalactosaminyltransferase 2 (EC 2.4.1.-) (Sd(a) beta-1,4-GalNAc transferase) (UDP-GalNAc:Neu5Aca2-3Galb-R b1,4-N-acetylgalactosaminyltransferase)	0.902098	12	6e-05	0.550395	23	0.0065022	0.351703	-0.17858
447114	1654-P24557_THAS,X5924.Q99708_CTIP	TBXAS1	P24557	THAS	Thromboxane-A synthase (TXA synthase) (TXS) (EC 5.3.99.5) (Cytochrome P450 5A1) (Hydroperoxy icosatetraenoate dehydratase) (EC 4.2.1.152)	RBBP8	Q99708	CTIP	DNA endonuclease RBBP8 (EC 3.1.-.-) (CtBP-interacting protein) (CtIP) (Retinoblastoma-binding protein 8) (RBBP-8) (Retinoblastoma-interacting protein and myosin-like) (RIM) (Sporulation in the absence of SPO11 protein 2 homolog) (SAE2)	0.928571	7	0.00251947	0.576923	13	0.0389926	0.351648	-0.17884
956058	4484-Q86YC2_PALB2,X5560.Q96FL9_GLT14	PALB2	Q86YC2	PALB2	Partner and localizer of BRCA2	GALNT14	Q96FL9	GLT14	Polypeptide N-acetylgalactosaminyltransferase 14 (EC 2.4.1.41) (Polypeptide GalNAc transferase 14) (GalNAc-T14) (pp-GaNTase 14) (Protein-UDP acetylgalactosaminyltransferase 14) (UDP-GalNAc:polypeptide N-acetylgalactosaminyltransferase 14)	0.90303	10	0.000343612	0.55188	20	0.0116424	0.351151	-0.18117
764984	3169-Q14126_DSG2,X6918.Q9NUU6_OTULL	DSG2	Q14126	DSG2	Desmoglein-2 (Cadherin family member 5) (HDGC)	OTULINL	Q9NUU6	OTULL	Inactive ubiquitin thioesterase OTULINL	0.925697	18	3.69e-08	0.574943	34	0.000375641	0.350754	-0.18303
215556	774-O75962_TRIO,X6003.Q9BR39_JPH2	TRIO	O75962	TRIO	Triple functional domain protein (EC 2.7.11.1) (PTPRF-interacting protein)	JPH2	Q9BR39	JPH2	Junctophilin-2 (JP-2) (Junctophilin type 2) [Cleaved into: Junctophilin-2 N-terminal fragment (JP2NT)]	0.90303	10	0.000343612	0.552795	22	0.00762648	0.350235	-0.18546
1020842	5064-Q8TEL6_TP4AP,X6648.Q9HB20_PKHA3	TRPC4AP	Q8TEL6	TP4AP	Short transient receptor potential channel 4-associated protein (Trp4-associated protein) (Trpc4-associated protein) (Protein TAP1) (TNF-receptor ubiquitous scaffolding/signaling protein) (Protein TRUSS)	PLEKHA3	Q9HB20	PKHA3	Pleckstrin homology domain-containing family A member 3 (PH domain-containing family A member 3) (Phosphatidylinositol-four-phosphate adapter protein 1) (FAPP-1) (Phosphoinositol 4-phosphate adapter protein 1)	0.916667	9	0.000506619	0.567647	16	0.0218146	0.34902	-0.19115
901149	4063-Q6PCB8_EMB,X7356.Q9UI30_TR112	EMB	Q6PCB8	EMB	Embigin	TRMT112	Q9UI30	TR112	Multifunctional methyltransferase subunit TRM112-like protein (tRNA methyltransferase 112 homolog)	0.915152	10	0.000204472	0.57013	21	0.00696617	0.345022	-0.20989
490393	1836-P32189_GLPK,X3511.Q16790_CAH9	GK	P32189	GLPK	Glycerol kinase (GK) (Glycerokinase) (EC 2.7.1.30) (ATP:glycerol 3-phosphotransferase)	CA9	Q16790	CAH9	Carbonic anhydrase 9 (EC 4.2.1.1) (Carbonate dehydratase IX) (Carbonic anhydrase IX) (CA-IX) (CAIX) (Membrane antigen MN) (P54/58N) (Renal cell carcinoma-associated antigen G250) (RCC-associated antigen G250) (pMW1)	0.902098	12	6e-05	0.558442	21	0.0085101	0.343656	-0.21629
868722	3827-Q5TGY3_AHDC1,X5750.Q96NL8_CH037	AHDC1	Q5TGY3	AHDC1	Transcription factor Gibbin (AT-hook DNA-binding motif-containing protein 1)	CFAP418	Q96NL8	CH037	Cilia- and flagella-associated protein 418	0.906593	13	1.93e-05	0.563478	24	0.00414	0.343115	-0.21882
1099619	5960-Q99986_VRK1,X7665.Q9Y2K1_ZBTB1	VRK1	Q99986	VRK1	Serine/threonine-protein kinase VRK1 (EC 2.7.11.1) (Vaccinia-related kinase 1)	ZBTB1	Q9Y2K1	ZBTB1	Zinc finger and BTB domain-containing protein 1	0.93808	18	8.94e-09	0.599389	34	0.000179727	0.338692	-0.23955
702148	2820-Q05513_KPCZ,X3853.Q5VV41_ARHGG	PRKCZ	Q05513	KPCZ	Protein kinase C zeta type (EC 2.7.11.13) (nPKC-zeta)	ARHGEF16	Q5VV41	ARHGG	Rho guanine nucleotide exchange factor 16 (Ephexin-4)	0.913313	18	1.22e-07	0.575248	34	0.000372328	0.338064	-0.24249
6828	26-A3KMH1_VWA8,X3242.Q14623_IHH	VWA8	A3KMH1	VWA8	von Willebrand factor A domain-containing protein 8 (PEX7-binding protein 2) (P7BP2)	IHH	Q14623	IHH	Indian hedgehog protein (IHH) (EC 3.1.-.-) (HHG-2) [Cleaved into: Indian hedgehog protein N-product]	0.937063	12	6.99e-06	0.6	26	0.00119479	0.337063	-0.24718
1058744	5475-Q96CS3_FAF2,X7613.Q9Y243_AKT3	FAF2	Q96CS3	FAF2	FAS-associated factor 2 (Protein ETEA) (UBX domain-containing protein 3B) (UBX domain-containing protein 8)	AKT3	Q9Y243	AKT3	RAC-gamma serine/threonine-protein kinase (EC 2.7.11.1) (Protein kinase Akt-3) (Protein kinase B gamma) (PKB gamma) (RAC-PK-gamma) (STK-2)	0.909091	11	0.000105593	0.572932	20	0.00827879	0.336159	-0.25142
317355	1150-P07355_ANXA2,X4523.Q8IVF2_AHNK2	ANXA2	P07355	ANXA2	Annexin A2 (Annexin II) (Annexin-2) (Calpactin I heavy chain) (Calpactin-1 heavy chain) (Chromobindin-8) (Lipocortin II) (Placental anticoagulant protein IV) (PAP-IV) (Protein I) (p36)	AHNAK2	Q8IVF2	AHNK2	Protein AHNAK2	0.925697	18	3.69e-08	0.593583	34	0.000215271	0.332114	-0.27037
849008	3693-Q5D0E6_DALD3,X6833.Q9NRH2_SNRK	DALRD3	Q5D0E6	DALD3	DALR anticodon-binding domain-containing protein 3	SNRK	Q9NRH2	SNRK	SNF-related serine/threonine-protein kinase (EC 2.7.11.1) (SNF1-related kinase)	0.928571	7	0.00251947	0.597059	16	0.0146097	0.331513	-0.27319
1119048	6260-Q9BZG8_DPH1,X7816.Q9Y4U1_MMAC	DPH1	Q9BZG8	DPH1	2-(3-amino-3-carboxypropyl)histidine synthase subunit 1 (EC 2.5.1.108) (Diphthamide biosynthesis protein 1) (Diphtheria toxin resistance protein 1) (Ovarian cancer-associated gene 1 protein) (S-adenosyl-L-methionine:L-histidine 3-amino-3-carboxypropyltransferase 1)	MMACHC	Q9Y4U1	MMAC	Cyanocobalamin reductase / alkylcobalamin dealkylase (Alkylcobalamin:glutathione S-alkyltransferase) (EC 2.5.1.151) (CblC) (Cyanocobalamin reductase (cyanide-eliminating)) (EC 1.16.1.6) (Methylmalonic aciduria and homocystinuria type C protein) (MMACHC)	0.929825	18	2.37e-08	0.599694	34	0.000178011	0.33013	-0.27967
823960	3531-Q17R98_ZN827,X7484.Q9ULJ6_ZMIZ1	ZNF827	Q17R98	ZN827	Zinc finger protein 827	ZMIZ1	Q9ULJ6	ZMIZ1	Zinc finger MIZ domain-containing protein 1 (PIAS-like protein Zimp10) (Retinoic acid-induced protein 17)	0.9	11	0.000159971	0.569925	20	0.00870372	0.330075	-0.27993
103541	365-O15541_R113A,X2149.P49459_UBE2A	RNF113A	O15541	R113A	E3 ubiquitin-protein ligase RNF113A (EC 2.3.2.27) (Cwc24 homolog) (RING finger protein 113A) (Zinc finger protein 183)	UBE2A	P49459	UBE2A	Ubiquitin-conjugating enzyme E2 A (EC 2.3.2.23) (E2 ubiquitin-conjugating enzyme A) (RAD6 homolog A) (HR6A) (hHR6A) (Ubiquitin carrier protein A) (Ubiquitin-protein ligase A)	0.919505	18	6.87e-08	0.58961	34	0.000243082	0.329894	-0.28077
1066183	5560-Q96FL9_GLT14,X5851.Q96ST8_CEP89	GALNT14	Q96FL9	GLT14	Polypeptide N-acetylgalactosaminyltransferase 14 (EC 2.4.1.41) (Polypeptide GalNAc transferase 14) (GalNAc-T14) (pp-GaNTase 14) (Protein-UDP acetylgalactosaminyltransferase 14) (UDP-GalNAc:polypeptide N-acetylgalactosaminyltransferase 14)	CEP89	Q96ST8	CEP89	Centrosomal protein of 89 kDa (Cep89) (Centrosomal protein 123) (Cep123) (Coiled-coil domain-containing protein 123)	0.90303	10	0.000343612	0.575325	21	0.00635831	0.327706	-0.29103
784878	3290-Q149N8_SHPRH,X3710.Q5J8M3_EMC4	SHPRH	Q149N8	SHPRH	E3 ubiquitin-protein ligase SHPRH (EC 2.3.2.27) (EC 3.6.4.-) (RING-type E3 ubiquitin transferase SHPRH) (SNF2, histone-linker, PHD and RING finger domain-containing helicase)	EMC4	Q5J8M3	EMC4	ER membrane protein complex subunit 4 (Cell proliferation-inducing gene 17 protein) (Transmembrane protein 85)	0.906593	13	1.93e-05	0.57913	24	0.00302339	0.327463	-0.29217
946407	4414-Q86UY6_NAA40,X5440.Q96BT3_CENPT	NAA40	Q86UY6	NAA40	N-alpha-acetyltransferase 40 (EC 2.3.1.257) (N-acetyltransferase 11) (N-alpha-acetyltransferase D) (NatD) (hNatD) (Protein acetyltransferase 1)	CENPT	Q96BT3	CENPT	Centromere protein T (CENP-T) (Interphase centromere complex protein 22)	0.900929	18	3.41e-07	0.574637	34	0.00037898	0.326292	-0.29766
234016	844-O94955_RHBT3,X6780.Q9NQB0_TF7L2	RHOBTB3	O94955	RHBT3	Rho-related BTB domain-containing protein 3 (EC 3.6.1.-)	TCF7L2	Q9NQB0	TF7L2	Transcription factor 7-like 2 (HMG box transcription factor 4) (T-cell-specific transcription factor 4) (T-cell factor 4) (TCF-4) (hTCF-4)	0.917582	13	9.91e-06	0.593846	25	0.00174995	0.323736	-0.30963
333052	1206-P09001_RM03,X7066.Q9NYK5_RM39	MRPL3	P09001	RM03	39S ribosomal protein L3, mitochondrial (L3mt) (MRP-L3) (Mitochondrial large ribosomal subunit protein uL3m)	MRPL39	Q9NYK5	RM39	39S ribosomal protein L39, mitochondrial (L39mt) (MRP-L39) (39S ribosomal protein L5, mitochondrial) (L5mt) (MRP-L5) (Mitochondrial large ribosomal subunit protein mL39)	0.923633	18	4.57e-08	0.601833	34	0.000166403	0.321799	-0.31871
192770	693-O75478_TAD2A,X6924.Q9NV31_IMP3	TADA2A	O75478	TAD2A	Transcriptional adapter 2-alpha (Transcriptional adapter 2-like) (ADA2-like protein)	IMP3	Q9NV31	IMP3	U3 small nucleolar ribonucleoprotein protein IMP3 (U3 snoRNP protein IMP3) (BRMS2)	0.918182	11	6.66e-05	0.596838	23	0.00264316	0.321344	-0.32084
306484	1111-P05451_REG1A,X3710.Q5J8M3_EMC4	REG1A	P05451	REG1A	Lithostathine-1-alpha (Islet cells regeneration factor) (ICRF) (Islet of Langerhans regenerating protein) (REG) (Pancreatic stone protein) (PSP) (Pancreatic thread protein) (PTP) (Regenerating islet-derived protein 1-alpha) (REG-1-alpha) (Regenerating protein I alpha)	EMC4	Q5J8M3	EMC4	ER membrane protein complex subunit 4 (Cell proliferation-inducing gene 17 protein) (Transmembrane protein 85)	0.933333	9	0.0002359	0.61203	20	0.00412987	0.321303	-0.32103
1131700	6478-Q9H4H8_FA83D,X7902.Q9Y6A5_TACC3	FAM83D	Q9H4H8	FA83D	Protein FAM83D (Spindle protein CHICA)	TACC3	Q9Y6A5	TACC3	Transforming acidic coiled-coil-containing protein 3 (ERIC-1)	0.917441	18	8.36e-08	0.602445	34	0.000163214	0.314996	-0.35059
587178	2268-P51795_CLCN5,X6906.Q9NUN5_LMBD1	CLCN5	P51795	CLCN5	H(+)/Cl(-) exchange transporter 5 (Chloride channel protein 5) (ClC-5) (Chloride transporter ClC-5)	LMBRD1	Q9NUN5	LMBD1	Lysosomal cobalamin transport escort protein LMBD1 (LMBD1) (HDAg-L-interacting protein NESI) (LMBR1 domain-containing protein 1) (Nuclear export signal-interacting protein)	0.906593	13	1.93e-05	0.593043	24	0.00225621	0.31355	-0.35736
959723	4514-Q8IV03_LUR1L,X7625.Q9Y275_TN13B	LURAP1L	Q8IV03	LUR1L	Leucine rich adaptor protein 1-like	TNFSF13B	Q9Y275	TN13B	Tumor necrosis factor ligand superfamily member 13B (B lymphocyte stimulator) (BLyS) (B-cell-activating factor) (BAFF) (Dendritic cell-derived TNF-like molecule) (TNF- and APOL-related leukocyte expressed ligand 1) (TALL-1) (CD antigen CD257) [Cleaved into: Tumor necrosis factor ligand superfamily member 13b, membrane form; Tumor necrosis factor ligand superfamily member 13b, soluble form]	0.902098	12	6e-05	0.589231	25	0.00193988	0.312867	-0.36056
303302	1102-P05166_PCCB,X2992.Q13131_AAPK1	PCCB	P05166	PCCB	Propionyl-CoA carboxylase beta chain, mitochondrial (PCCase subunit beta) (EC 6.4.1.3) (Propanoyl-CoA:carbon dioxide ligase subunit beta)	PRKAA1	Q13131	AAPK1	5'-AMP-activated protein kinase catalytic subunit alpha-1 (AMPK subunit alpha-1) (EC 2.7.11.1) (Acetyl-CoA carboxylase kinase) (ACACA kinase) (EC 2.7.11.27) (Hydroxymethylglutaryl-CoA reductase kinase) (HMGCR kinase) (EC 2.7.11.31) (Tau-protein kinase PRKAA1) (EC 2.7.11.26)	0.905057	18	2.46e-07	0.594194	34	0.000211255	0.310863	-0.36996
288907	1051-P02753_RET4,X2818.Q05397_FAK1	RBP4	P02753	RET4	Retinol-binding protein 4 (Plasma retinol-binding protein) (PRBP) (RBP) [Cleaved into: Plasma retinol-binding protein(1-182); Plasma retinol-binding protein(1-181); Plasma retinol-binding protein(1-179); Plasma retinol-binding protein(1-176)]	PTK2	Q05397	FAK1	Focal adhesion kinase 1 (FADK 1) (EC 2.7.10.2) (Focal adhesion kinase-related nonkinase) (FRNK) (Protein phosphatase 1 regulatory subunit 71) (PPP1R71) (Protein-tyrosine kinase 2) (p125FAK) (pp125FAK)	0.90303	10	0.000343612	0.592321	22	0.00367842	0.31071	-0.37067
901090	4063-Q6PCB8_EMB,X5426.Q96BF6_NACC2	EMB	Q6PCB8	EMB	Embigin	NACC2	Q96BF6	NACC2	Nucleus accumbens-associated protein 2 (NAC-2) (BTB/POZ domain-containing protein 14A) (Repressor with BTB domain and BEN domain)	1	4	0	0.690476	8	0.0579903	0.309524	-0.37623
666941	2645-P78549_NTH,X6613.Q9H9Q2_CSN7B	NTHL1	P78549	NTH	Endonuclease III-like protein 1 (hNTH1) (EC 3.2.2.-) (EC 4.2.99.18) (Bifunctional DNA N-glycosylase/DNA-(apurinic or apyrimidinic site) lyase) (DNA glycosylase/AP lyase)	COPS7B	Q9H9Q2	CSN7B	COP9 signalosome complex subunit 7b (SGN7b) (Signalosome subunit 7b) (JAB1-containing signalosome subunit 7b)	0.915152	10	0.000204472	0.605872	22	0.00280345	0.309279	-0.37738
466705	1736-P28676_GRAN,X4959.Q8NHY0_B4GN2	GCA	P28676	GRAN	Grancalcin	B4GALNT2	Q8NHY0	B4GN2	Beta-1,4 N-acetylgalactosaminyltransferase 2 (EC 2.4.1.-) (Sd(a) beta-1,4-GalNAc transferase) (UDP-GalNAc:Neu5Aca2-3Galb-R b1,4-N-acetylgalactosaminyltransferase)	0.909091	12	4.19e-05	0.600791	23	0.00243293	0.3083	-0.38196
752038	3098-Q13572_ITPK1,X6533.Q9H706_GARE1	ITPK1	Q13572	ITPK1	Inositol-tetrakisphosphate 1-kinase (EC 2.7.1.134) (Inositol 1,3,4-trisphosphate 5/6-kinase) (Inositol-triphosphate 5/6-kinase) (Ins(1,3,4)P(3) 5/6-kinase) (EC 2.7.1.159)	GAREM1	Q9H706	GARE1	GRB2-associated and regulator of MAPK protein 1 (GRB2-associated and regulator of MAPK1)	0.938461	14	6.86e-07	0.634921	27	0.000374199	0.303541	-0.40427
1079028	5706-Q96LA8_ANM6,X6678.Q9HC44_GPBL1	PRMT6	Q96LA8	ANM6	Protein arginine N-methyltransferase 6 (EC 2.1.1.319) (Heterogeneous nuclear ribonucleoprotein methyltransferase-like protein 6) (Histone-arginine N-methyltransferase PRMT6)	GPBP1L1	Q9HC44	GPBL1	Vasculin-like protein 1 (GC-rich promoter-binding protein 1-like 1)	0.939394	10	5.48e-05	0.637493	22	0.00141607	0.301901	-0.41195
459882	1710-P27635_RL10,X2600.P63220_RS21	RPL10	P27635	RL10	60S ribosomal protein L10 (Laminin receptor homolog) (Large ribosomal subunit protein uL16) (Protein QM) (Ribosomal protein L10) (Tumor suppressor QM)	RPS21	P63220	RS21	40S ribosomal protein S21 (Small ribosomal subunit protein eS21)	0.925697	18	3.69e-08	0.624141	34	8e-05	0.301556	-0.41357
1076392	5676-Q96JQ2_CLMN,X6663.Q9HBK9_AS3MT	CLMN	Q96JQ2	CLMN	Calmin (Calponin-like transmembrane domain protein)	AS3MT	Q9HBK9	AS3MT	Arsenite methyltransferase (EC 2.1.1.137) (Methylarsonite methyltransferase) (S-adenosyl-L-methionine:arsenic(III) methyltransferase)	0.934066	13	3e-06	0.634105	22	0.00152897	0.299961	-0.42104
155639	555-O60547_GMDS,X2855.Q07654_TFF3	GMDS	O60547	GMDS	GDP-mannose 4,6 dehydratase (EC 4.2.1.47) (GDP-D-mannose dehydratase) (GMD)	TFF3	Q07654	TFF3	Trefoil factor 3 (Intestinal trefoil factor) (hITF) (Polypeptide P1.B) (hP1.B)	0.918182	11	6.66e-05	0.619549	20	0.00357585	0.298633	-0.42726
209345	751-O75864_PPR37,X7396.Q9UJT1_TBD	PPP1R37	O75864	PPR37	Protein phosphatase 1 regulatory subunit 37 (Leucine-rich repeat-containing protein 68)	TUBD1	Q9UJT1	TBD	Tubulin delta chain (Delta-tubulin)	0.903571	15	3.88e-06	0.60547	26	0.00104719	0.298101	-0.42976
250885	902-O95342_ABCBB,X6779.Q9NQ94_A1CF	ABCB11	O95342	ABCBB	Bile salt export pump (EC 7.6.2.-) (ATP-binding cassette sub-family B member 11)	A1CF	Q9NQ94	A1CF	APOBEC1 complementation factor (APOBEC1-stimulating protein)	0.942209	18	5.21e-09	0.645531	34	3.75e-05	0.296678	-0.43643
532219	2021-P42766_RL35,X2154.P49591_SYSC	RPL35	P42766	RL35	60S ribosomal protein L35 (Large ribosomal subunit protein uL29)	SARS1	P49591	SYSC	Serine--tRNA ligase, cytoplasmic (EC 6.1.1.11) (Seryl-tRNA synthetase) (SerRS) (Seryl-tRNA(Ser/Sec) synthetase)	0.909185	18	1.74e-07	0.612529	34	0.000117911	0.296656	-0.43653
100507	355-O15484_CAN5,X1797.P30536_TSPO	CAPN5	O15484	CAN5	Calpain-5 (EC 3.4.22.-) (Calpain htra-3) (New calpain 3) (nCL-3)	TSPO	P30536	TSPO	Translocator protein (Mitochondrial benzodiazepine receptor) (PKBS) (Peripheral-type benzodiazepine receptor) (PBR)	0.905057	18	2.46e-07	0.608862	34	0.000132878	0.296195	-0.43869
192668	693-O75478_TAD2A,X3796.Q5T5X7_BEND3	TADA2A	O75478	TAD2A	Transcriptional adapter 2-alpha (Transcriptional adapter 2-like) (ADA2-like protein)	BEND3	Q5T5X7	BEND3	BEN domain-containing protein 3	0.9	11	0.000159971	0.607708	23	0.00209903	0.292292	-0.45698
481741	1800-P30622_CLIP1,X4806.Q8N961_ABTB2	CLIP1	P30622	CLIP1	CAP-Gly domain-containing linker protein 1 (Cytoplasmic linker protein 1) (Cytoplasmic linker protein 170 alpha-2) (CLIP-170) (Reed-Sternberg intermediate filament-associated protein) (Restin)	ABTB2	Q8N961	ABTB2	Ankyrin repeat and BTB/POZ domain-containing protein 2	0.90303	10	0.000343612	0.611688	21	0.00321268	0.291342	-0.46143
711899	2867-Q08174_PCDH1,X3773.Q5T0Z8_CF132	PCDH1	Q08174	PCDH1	Protocadherin-1 (Cadherin-like protein 1) (Protocadherin-42) (PC42)	C6orf132	Q5T0Z8	CF132	Uncharacterized protein C6orf132	0.911249	18	1.46e-07	0.620168	34	9.15e-05	0.291081	-0.46265
145069	514-O60268_K0513,X596.O60907_TBL1X	KIAA0513	O60268	K0513	Uncharacterized protein KIAA0513	TBL1X	O60907	TBL1X	F-box-like/WD repeat-containing protein TBL1X (SMAP55) (Transducin beta-like protein 1X) (Transducin-beta-like protein 1, X-linked)	0.923529	16	3.34e-07	0.632698	32	0.000102101	0.290831	-0.46382
535391	2034-P43250_GRK6,X4700.Q8N302_AGGF1	GRK6	P43250	GRK6	G protein-coupled receptor kinase 6 (EC 2.7.11.16) (G protein-coupled receptor kinase GRK6)	AGGF1	Q8N302	AGGF1	Angiogenic factor with G patch and FHA domains 1 (Angiogenic factor VG5Q) (hVG5Q) (G patch domain-containing protein 7) (Vasculogenesis gene on 5q protein)	0.909091	11	0.000105593	0.619549	20	0.00357585	0.289542	-0.46986
768086	3189-Q14166_TTL12,X7062.Q9NYH9_UTP6	TTLL12	Q14166	TTL12	Tubulin--tyrosine ligase-like protein 12 (Inactive tubulin--tyrosine ligase-like protein 12)	UTP6	Q9NYH9	UTP6	U3 small nucleolar RNA-associated protein 6 homolog (Hepatocellular carcinoma-associated antigen 66) (Multiple hat domains protein)	0.900929	18	3.41e-07	0.612223	34	0.000119097	0.288706	-0.47378
318733	1155-P07686_HEXB,X5208.Q92484_ASM3A	HEXB	P07686	HEXB	Beta-hexosaminidase subunit beta (EC 3.2.1.52) (Beta-N-acetylhexosaminidase subunit beta) (Hexosaminidase subunit B) (Cervical cancer proto-oncogene 7 protein) (HCC-7) (N-acetyl-beta-glucosaminidase subunit beta) [Cleaved into: Beta-hexosaminidase subunit beta chain B; Beta-hexosaminidase subunit beta chain A]	SMPDL3A	Q92484	ASM3A	Acid sphingomyelinase-like phosphodiesterase 3a (ASM-like phosphodiesterase 3a) (EC 3.1.4.-)	0.929412	16	1.94e-07	0.641862	32	7.51e-05	0.28755	-0.4792
324882	1178-P08138_TNR16,X6161.Q9BW62_KATL1	NGFR	P08138	TNR16	Tumor necrosis factor receptor superfamily member 16 (Gp80-LNGFR) (Low affinity neurotrophin receptor p75NTR) (Low-affinity nerve growth factor receptor) (NGF receptor) (p75 ICD) (CD antigen CD271)	KATNAL1	Q9BW62	KATL1	Katanin p60 ATPase-containing subunit A-like 1 (Katanin p60 subunit A-like 1) (EC 5.6.1.1) (p60 katanin-like 1)	0.904762	8	0.00200828	0.617857	15	0.0141039	0.286905	-0.48222
722659	2932-Q12834_CDC20,X7902.Q9Y6A5_TACC3	CDC20	Q12834	CDC20	Cell division cycle protein 20 homolog (p55CDC)	TACC3	Q9Y6A5	TACC3	Transforming acidic coiled-coil-containing protein 3 (ERIC-1)	0.929825	18	2.37e-08	0.643392	34	4.05e-05	0.286433	-0.48443
666824	2645-P78549_NTH,X4774.Q8N5Y8_PAR16	NTHL1	P78549	NTH	Endonuclease III-like protein 1 (hNTH1) (EC 3.2.2.-) (EC 4.2.99.18) (Bifunctional DNA N-glycosylase/DNA-(apurinic or apyrimidinic site) lyase) (DNA glycosylase/AP lyase)	PARP16	Q8N5Y8	PAR16	Protein mono-ADP-ribosyltransferase PARP16 (EC 2.4.2.-) (ADP-ribosyltransferase diphtheria toxin-like 15) (Poly [ADP-ribose] polymerase 16) (PARP-16)	1	4	0	0.716667	9	0.029818	0.283333	-0.49896
574010	2202-P50416_CPT1A,X4236.Q7KZF4_SND1	CPT1A	P50416	CPT1A	Carnitine O-palmitoyltransferase 1, liver isoform (CPT1-L) (EC 2.3.1.21) (Carnitine O-palmitoyltransferase I, liver isoform) (CPT I) (CPTI-L) (Carnitine palmitoyltransferase 1A)	SND1	Q7KZF4	SND1	Staphylococcal nuclease domain-containing protein 1 (EC 3.1.31.1) (100 kDa coactivator) (EBNA2 coactivator p100) (Tudor domain-containing protein 11) (p100 co-activator)	0.909185	18	1.74e-07	0.627196	34	7.2e-05	0.281988	-0.50526
373122	1363-P13796_PLSL,X4100.Q6PUV4_CPLX2	LCP1	P13796	PLSL	Plastin-2 (L-plastin) (LC64P) (Lymphocyte cytosolic protein 1) (LCP-1)	CPLX2	Q6PUV4	CPLX2	Complexin-2 (Complexin II) (CPX II) (Synaphin-1)	0.905057	18	2.46e-07	0.62903	34	6.76e-05	0.276027	-0.53319
269626	975-O95832_CLD1,X6003.Q9BR39_JPH2	CLDN1	O95832	CLD1	Claudin-1 (Senescence-associated epithelial membrane protein)	JPH2	Q9BR39	JPH2	Junctophilin-2 (JP-2) (Junctophilin type 2) [Cleaved into: Junctophilin-2 N-terminal fragment (JP2NT)]	0.90303	10	0.000343612	0.629588	22	0.00169129	0.273442	-0.54531
981958	4709-Q8N3F0_MTURN,X4837.Q8NB91_FANCB	MTURN	Q8N3F0	MTURN	Maturin (Maturin neural progenitor differentiation regulator protein homolog) (Protein Ells1)	FANCB	Q8NB91	FANCB	Fanconi anemia group B protein (Protein FACB) (Fanconi anemia-associated polypeptide of 95 kDa) (FAAP95)	1	5	0	0.727273	12	0.00735503	0.272727	-0.54866
977994	4674-Q8N129_CNPY4,X5560.Q96FL9_GLT14	CNPY4	Q8N129	CNPY4	Protein canopy homolog 4	GALNT14	Q96FL9	GLT14	Polypeptide N-acetylgalactosaminyltransferase 14 (EC 2.4.1.41) (Polypeptide GalNAc transferase 14) (GalNAc-T14) (pp-GaNTase 14) (Protein-UDP acetylgalactosaminyltransferase 14) (UDP-GalNAc:polypeptide N-acetylgalactosaminyltransferase 14)	0.915152	10	0.000204472	0.644156	21	0.00162414	0.270996	-0.55677
1040505	5268-Q92692_NECT2,X5560.Q96FL9_GLT14	NECTIN2	Q92692	NECT2	Nectin-2 (Herpes virus entry mediator B) (Herpesvirus entry mediator B) (HveB) (Nectin cell adhesion molecule 2) (Poliovirus receptor-related protein 2) (CD antigen CD112)	GALNT14	Q96FL9	GLT14	Polypeptide N-acetylgalactosaminyltransferase 14 (EC 2.4.1.41) (Polypeptide GalNAc transferase 14) (GalNAc-T14) (pp-GaNTase 14) (Protein-UDP acetylgalactosaminyltransferase 14) (UDP-GalNAc:polypeptide N-acetylgalactosaminyltransferase 14)	0.90303	10	0.000343612	0.632467	21	0.00209429	0.270563	-0.5588
268027	969-O95810_CAVN2,X4567.Q8IWT6_LRC8A	CAVIN2	O95810	CAVN2	Caveolae-associated protein 2 (Cavin-2) (PS-p68) (Phosphatidylserine-binding protein) (Serum deprivation-response protein)	LRRC8A	Q8IWT6	LRC8A	Volume-regulated anion channel subunit LRRC8A (Leucine-rich repeat-containing protein 8A) (HsLRRC8A) (Swelling protein 1)	0.946429	15	9.45e-08	0.676085	30	4.12e-05	0.270344	-0.55982
639145	2520-P61978_HNRPK,X5287.Q92804_RBP56	HNRNPK	P61978	HNRPK	Heterogeneous nuclear ribonucleoprotein K (hnRNP K) (Transformation up-regulated nuclear protein) (TUNP)	TAF15	Q92804	RBP56	TATA-binding protein-associated factor 2N (68 kDa TATA-binding protein-associated factor) (TAF(II)68) (TAFII68) (RNA-binding protein 56)	0.931889	18	1.88e-08	0.662643	34	1.96e-05	0.269245	-0.56497
992479	4802-Q8N8V4_ANS4B,X5998.Q9BQL6_FERM1	ANKS4B	Q8N8V4	ANS4B	Ankyrin repeat and SAM domain-containing protein 4B (Harmonin-interacting ankyrin repeat-containing protein) (Harp)	FERMT1	Q9BQL6	FERM1	Fermitin family homolog 1 (Kindlerin) (Kindlin syndrome protein) (Kindlin-1) (Unc-112-related protein 1)	0.905057	18	2.46e-07	0.63728	34	5.05e-05	0.267776	-0.57186
778731	3252-Q14677_EPN4,X6958.Q9NVS2_RT18A	CLINT1	Q14677	EPN4	Clathrin interactor 1 (Clathrin-interacting protein localized in the trans-Golgi region) (Clint) (Enthoprotin) (Epsin-4) (Epsin-related protein) (EpsinR)	MRPS18A	Q9NVS2	RT18A	39S ribosomal protein S18a, mitochondrial (MRP-S18-a) (Mrps18a) (S18mt-a) (39S ribosomal protein S18-3, mitochondrial) (MRP-S18-3) (Mitochondrial large ribosomal subunit protein bS18a) (Mitochondrial large ribosomal subunit protein mL66)	0.93808	18	8.94e-09	0.670588	34	1.43e-05	0.267492	-0.57319
300468	1093-P05091_ALDH2,X7532.Q9UNA1_RHG26	ALDH2	P05091	ALDH2	Aldehyde dehydrogenase, mitochondrial (EC 1.2.1.3) (ALDH class 2) (ALDH-E2) (ALDHI)	ARHGAP26	Q9UNA1	RHG26	Rho GTPase-activating protein 26 (GTPase regulator associated with focal adhesion kinase) (Oligophrenin-1-like protein) (Rho-type GTPase-activating protein 26)	0.913313	18	1.22e-07	0.646142	34	3.66e-05	0.267171	-0.5747
772413	3213-Q14314_FGL2,X7613.Q9Y243_AKT3	FGL2	Q14314	FGL2	Fibroleukin (Fibrinogen-like protein 2) (pT49)	AKT3	Q9Y243	AKT3	RAC-gamma serine/threonine-protein kinase (EC 2.7.11.1) (Protein kinase Akt-3) (Protein kinase B gamma) (PKB gamma) (RAC-PK-gamma) (STK-2)	1	4	0	0.733333	9	0.0245542	0.266667	-0.57706
1082421	5750-Q96NL8_CH037,X6286.Q9C0B1_FTO	CFAP418	Q96NL8	CH037	Cilia- and flagella-associated protein 418	FTO	Q9C0B1	FTO	Alpha-ketoglutarate-dependent dioxygenase FTO (Fat mass and obesity-associated protein) (U6 small nuclear RNA (2'-O-methyladenosine-N(6)-)-demethylase FTO) (EC 1.14.11.-) (U6 small nuclear RNA N(6)-methyladenosine-demethylase FTO) (EC 1.14.11.-) (mRNA (2'-O-methyladenosine-N(6)-)-demethylase FTO) (m6A(m)-demethylase FTO) (EC 1.14.11.-) (mRNA N(6)-methyladenosine demethylase FTO) (EC 1.14.11.53) (…	0.923077	13	6.85e-06	0.657391	24	0.000482044	0.265686	-0.58165
713053	2873-Q08357_S20A2,X3463.Q16270_IBP7	SLC20A2	Q08357	S20A2	Sodium-dependent phosphate transporter 2 (Gibbon ape leukemia virus receptor 2) (GLVR-2) (Phosphate transporter 2) (PiT-2) (Pit2) (hPit2) (Solute carrier family 20 member 2)	IGFBP7	Q16270	IBP7	Insulin-like growth factor-binding protein 7 (IBP-7) (IGF-binding protein 7) (IGFBP-7) (IGFBP-rP1) (MAC25 protein) (PGI2-stimulating factor) (Prostacyclin-stimulating factor) (Tumor-derived adhesion factor) (TAF)	0.919118	17	1.87e-07	0.654746	33	3.56e-05	0.264372	-0.58781
648450	2559-P62750_RL23A,X6979.Q9NWB6_ARGL1	RPL23A	P62750	RL23A	60S ribosomal protein L23a (Large ribosomal subunit protein uL23)	ARGLU1	Q9NWB6	ARGL1	Arginine and glutamate-rich protein 1	0.919505	18	6.87e-08	0.655309	34	2.6e-05	0.264195	-0.58864
777162	3242-Q14623_IHH,X7370.Q9UIJ7_KAD3	IHH	Q14623	IHH	Indian hedgehog protein (IHH) (EC 3.1.-.-) (HHG-2) [Cleaved into: Indian hedgehog protein N-product]	AK3	Q9UIJ7	KAD3	GTP:AMP phosphotransferase AK3, mitochondrial (EC 2.7.4.10) (Adenylate kinase 3) (AK 3) (Adenylate kinase 3 alpha-like 1)	0.937063	12	6.99e-06	0.673162	26	0.000164165	0.2639	-0.59002
492537	1845-P32926_DSG3,X4114.Q6UB98_ANR12	DSG3	P32926	DSG3	Desmoglein-3 (130 kDa pemphigus vulgaris antigen) (PVA) (Cadherin family member 6)	ANKRD12	Q6UB98	ANR12	Ankyrin repeat domain-containing protein 12 (Ankyrin repeat-containing cofactor 2) (GAC-1 protein)	0.928571	7	0.00251947	0.664835	13	0.0131656	0.263736	-0.59079
1164	5-A0AVI4_TM129,X5899.Q99571_P2RX4	TMEM129	A0AVI4	TM129	E3 ubiquitin-protein ligase TM129 (EC 2.3.2.27) (RING-type E3 ubiquitin transferase TM129)	P2RX4	Q99571	P2RX4	P2X purinoceptor 4 (P2X4) (ATP receptor) (Purinergic receptor)	0.923077	13	6.85e-06	0.66	24	0.000449402	0.263077	-0.59388
239250	864-O95154_ARK73,X4079.Q6PIF6_MYO7B	AKR7A3	O95154	ARK73	Aflatoxin B1 aldehyde reductase member 3 (EC 1.-.-.-) (AFB1 aldehyde reductase 2) (AFB1-AR 2)	MYO7B	Q6PIF6	MYO7B	Unconventional myosin-VIIb	0.960784	18	2.49e-10	0.699312	34	4.2e-06	0.261472	-0.6014
955664	4481-Q86Y91_KI18B,X5693.Q96KM6_Z512B	KIF18B	Q86Y91	KI18B	Kinesin-like protein KIF18B	ZNF512B	Q96KM6	Z512B	Zinc finger protein 512B	0.920879	14	2.98e-06	0.660646	28	0.000130067	0.260233	-0.6072
1053161	5410-Q96AX9_MIB2,X6664.Q9HBL0_TENS1	MIB2	Q96AX9	MIB2	E3 ubiquitin-protein ligase MIB2 (EC 2.3.2.27) (Mind bomb homolog 2) (Novel zinc finger protein) (Novelzin) (Putative NF-kappa-B-activating protein 002N) (RING-type E3 ubiquitin transferase MIB2) (Skeletrophin) (Zinc finger ZZ type with ankyrin repeat domain protein 1)	TNS1	Q9HBL0	TENS1	Tensin-1	0.925	15	7.99e-07	0.665025	28	0.00011304	0.259975	-0.60841
864093	3791-Q5T4D3_TMTC4,X6643.Q9HAW9_UD18	TMTC4	Q5T4D3	TMTC4	Protein O-mannosyl-transferase TMTC4 (EC 2.4.1.109) (Transmembrane and TPR repeat-containing protein 4)	UGT1A8	Q9HAW9	UD18	UDP-glucuronosyltransferase 1A8 (UGT1A8) (EC 2.4.1.17) (UDP-glucuronosyltransferase 1-8) (UDPGT 1-8) (UGT1*8) (UGT1-08) (UGT1.8) (UDP-glucuronosyltransferase 1-H) (UGT-1H) (UGT1H)	0.954546	11	4.99e-06	0.697628	23	0.000215229	0.256917	-0.62274
901093	4063-Q6PCB8_EMB,X5560.Q96FL9_GLT14	EMB	Q6PCB8	EMB	Embigin	GALNT14	Q96FL9	GLT14	Polypeptide N-acetylgalactosaminyltransferase 14 (EC 2.4.1.41) (Polypeptide GalNAc transferase 14) (GalNAc-T14) (pp-GaNTase 14) (Protein-UDP acetylgalactosaminyltransferase 14) (UDP-GalNAc:polypeptide N-acetylgalactosaminyltransferase 14)	1	4	0	0.745455	11	0.00845473	0.254545	-0.63386
452515	1676-P25705_ATPA,X3936.Q6DN12_MCTP2	ATP5F1A	P25705	ATPA	ATP synthase subunit alpha, mitochondrial (ATP synthase F1 subunit alpha)	MCTP2	Q6DN12	MCTP2	Multiple C2 and transmembrane domain-containing protein 2	0.909091	11	0.000105593	0.657143	20	0.00164309	0.251948	-0.64603
659563	2606-P67809_YBOX1,X6544.Q9H7E9_CH033	YBX1	P67809	YBOX1	Y-box-binding protein 1 (YB-1) (CCAAT-binding transcription factor I subunit A) (CBF-A) (DNA-binding protein B) (DBPB) (Enhancer factor I subunit A) (EFI-A) (Nuclease-sensitive element-binding protein 1) (Y-box transcription factor)	C8orf33	Q9H7E9	CH033	UPF0488 protein C8orf33	0.902993	18	2.9e-07	0.651948	34	2.95e-05	0.251045	-0.65026
626625	2464-P60604_UB2G2,X7342.Q9UHV5_RPGFL	UBE2G2	P60604	UB2G2	Ubiquitin-conjugating enzyme E2 G2 (EC 2.3.2.23) (E2 ubiquitin-conjugating enzyme G2) (Ubiquitin carrier protein G2) (Ubiquitin-protein ligase G2)	RAPGEFL1	Q9UHV5	RPGFL	Rap guanine nucleotide exchange factor-like 1 (Link guanine nucleotide exchange factor II) (Link GEFII)	0.907692	14	7.3e-06	0.657509	27	0.000194039	0.250183	-0.6543
850383	3702-Q5H9F3_BCORL,X5350.Q969E8_TSR2	BCORL1	Q5H9F3	BCORL	BCL-6 corepressor-like protein 1 (BCoR-L1) (BCoR-like protein 1)	TSR2	Q969E8	TSR2	Pre-rRNA-processing protein TSR2 homolog	0.902993	18	2.9e-07	0.653476	34	2.79e-05	0.249517	-0.65742
71362	255-O14965_AURKA,X653.O75330_HMMR	AURKA	O14965	AURKA	Aurora kinase A (EC 2.7.11.1) (Aurora 2) (Aurora/IPL1-related kinase 1) (ARK-1) (Aurora-related kinase 1) (Breast tumor-amplified kinase) (Ipl1- and aurora-related kinase 1) (Serine/threonine-protein kinase 15) (Serine/threonine-protein kinase 6) (Serine/threonine-protein kinase Ayk1) (Serine/threonine-protein kinase aurora-A)	HMMR	O75330	HMMR	Hyaluronan mediated motility receptor (Intracellular hyaluronic acid-binding protein) (Receptor for hyaluronan-mediated motility) (CD antigen CD168)	0.905057	18	2.46e-07	0.655921	34	2.54e-05	0.249136	-0.6592
1036108	5219-Q92540_SMG7,X5805.Q96RD7_PANX1	SMG7	Q92540	SMG7	Nonsense-mediated mRNA decay factor SMG7 (SMG-7 homolog) (hSMG-7)	PANX1	Q96RD7	PANX1	Pannexin-1	0.902993	18	2.9e-07	0.659587	34	2.21e-05	0.243405	-0.68606
242707	874-O95178_NDUB2,X3242.Q14623_IHH	NDUFB2	O95178	NDUB2	NADH dehydrogenase [ubiquinone] 1 beta subcomplex subunit 2, mitochondrial (Complex I-AGGG) (CI-AGGG) (NADH-ubiquinone oxidoreductase AGGG subunit)	IHH	Q14623	IHH	Indian hedgehog protein (IHH) (EC 3.1.-.-) (HHG-2) [Cleaved into: Indian hedgehog protein N-product]	0.909091	12	4.19e-05	0.669744	26	0.000182284	0.239347	-0.70507
405553	1495-P17980_PRS6A,X6153.Q9BVT8_TMUB1	PSMC3	P17980	PRS6A	26S proteasome regulatory subunit 6A (26S proteasome AAA-ATPase subunit RPT5) (Proteasome 26S subunit ATPase 3) (Proteasome subunit P50) (Tat-binding protein 1) (TBP-1)	TMUB1	Q9BVT8	TMUB1	Transmembrane and ubiquitin-like domain-containing protein 1 (Dendritic cell-derived ubiquitin-like protein) (DULP) (Hepatocyte odd protein shuttling protein) (Ubiquitin-like protein SB144) [Cleaved into: iHOPS]	0.931889	18	1.88e-08	0.695034	34	5.08e-06	0.236854	-0.71676
447041	1654-P24557_THAS,X3012.Q13214_SEM3B	TBXAS1	P24557	THAS	Thromboxane-A synthase (TXA synthase) (TXS) (EC 5.3.99.5) (Cytochrome P450 5A1) (Hydroperoxy icosatetraenoate dehydratase) (EC 4.2.1.152)	SEMA3B	Q13214	SEM3B	Semaphorin-3B (Sema A(V)) (Semaphorin-V) (Sema V)	0.9	11	0.000159971	0.666165	20	0.00134213	0.233835	-0.73091
654280	2581-P62913_RL11,X3660.Q53HC5_KLH26	RPL11	P62913	RL11	60S ribosomal protein L11 (CLL-associated antigen KW-12) (Large ribosomal subunit protein uL5)	KLHL26	Q53HC5	KLH26	Kelch-like protein 26	0.909091	12	4.19e-05	0.677866	23	0.000379131	0.231225	-0.74313
480753	1795-P30530_UFO,X7065.Q9NYJ8_TAB2	AXL	P30530	UFO	Tyrosine-protein kinase receptor UFO (EC 2.7.10.1) (AXL oncogene)	TAB2	Q9NYJ8	TAB2	TGF-beta-activated kinase 1 and MAP3K7-binding protein 2 (Mitogen-activated protein kinase kinase kinase 7-interacting protein 2) (TAK1-binding protein 2) (TAB-2) (TGF-beta-activated kinase 1-binding protein 2)	0.917857	15	1.42e-06	0.68856	28	5.11e-05	0.229297	-0.75217
118669	423-O43439_MTG8R,X6648.Q9HB20_PKHA3	CBFA2T2	O43439	MTG8R	Protein CBFA2T2 (ETO homologous on chromosome 20) (MTG8-like protein) (MTG8-related protein 1) (Myeloid translocation-related protein 1) (p85)	PLEKHA3	Q9HB20	PKHA3	Pleckstrin homology domain-containing family A member 3 (PH domain-containing family A member 3) (Phosphatidylinositol-four-phosphate adapter protein 1) (FAPP-1) (Phosphoinositol 4-phosphate adapter protein 1)	0.909091	12	4.19e-05	0.680769	25	0.00018013	0.228322	-0.75674
980805	4698-Q8N2S1_LTBP4,X4836.Q8NB90_AFG2H	LTBP4	Q8N2S1	LTBP4	Latent-transforming growth factor beta-binding protein 4 (LTBP-4)	SPATA5	Q8NB90	AFG2H	Ribosome biogenesis protein SPATA5 (EC 3.6.4.10) (Spermatogenesis-associated factor protein) (Spermatogenesis-associated protein 5)	0.909091	12	4.19e-05	0.68083	23	0.000349204	0.228261	-0.75702
723610	2939-Q12864_CAD17,X3747.Q5R3I4_TTC38	CDH17	Q12864	CAD17	Cadherin-17 (Intestinal peptide-associated transporter HPT-1) (Liver-intestine cadherin) (LI-cadherin)	TTC38	Q5R3I4	TTC38	Tetratricopeptide repeat protein 38 (TPR repeat protein 38)	0.915377	18	1.01e-07	0.687395	34	7.09e-06	0.227982	-0.75833
192681	693-O75478_TAD2A,X4277.Q7LGA3_HS2ST	TADA2A	O75478	TAD2A	Transcriptional adapter 2-alpha (Transcriptional adapter 2-like) (ADA2-like protein)	HS2ST1	Q7LGA3	HS2ST	Heparan sulfate 2-O-sulfotransferase 1 (2-O-sulfotransferase) (2OST) (EC 2.8.2.-)	0.909091	11	0.000105593	0.682806	23	0.000330407	0.226285	-0.76629
1023578	5092-Q8WU10_PYRD1,X5705.Q96L93_KI16B	PYROXD1	Q8WU10	PYRD1	Pyridine nucleotide-disulfide oxidoreductase domain-containing protein 1 (EC 1.8.1.-)	KIF16B	Q96L93	KI16B	Kinesin-like protein KIF16B (Sorting nexin-23)	0.936364	11	2.21e-05	0.711278	20	0.000437699	0.225085	-0.7719
51475	190-O14548_COX7R,X4987.Q8TB37_NUBPL	COX7A2L	O14548	COX7R	Cytochrome c oxidase subunit 7A-related protein, mitochondrial (COX7a-related protein) (Cytochrome c oxidase subunit VIIa-related protein) (EB1)	NUBPL	Q8TB37	NUBPL	Iron-sulfur protein NUBPL (IND1 homolog) (Nucleotide-binding protein-like) (huInd1)	0.912088	13	1.4e-05	0.687521	26	0.000104181	0.224567	-0.77434
959654	4514-Q8IV03_LUR1L,X5189.Q8WXX7_AUTS2	LURAP1L	Q8IV03	LUR1L	Leucine rich adaptor protein 1-like	AUTS2	Q8WXX7	AUTS2	Autism susceptibility gene 2 protein	0.916084	12	2.84e-05	0.692308	25	0.000125786	0.223776	-0.77804
987170	4751-Q8N5C6_SRBD1,X7767.Q9Y3U8_RL36	SRBD1	Q8N5C6	SRBD1	S1 RNA-binding domain-containing protein 1	RPL36	Q9Y3U8	RL36	60S ribosomal protein L36 (Large ribosomal subunit protein eL36)	0.946336	18	2.92e-09	0.723147	34	1.36e-06	0.223189	-0.78079
890263	3981-Q6N069_NAA16,X7701.Q9Y2Z0_SGT1	NAA16	Q6N069	NAA16	N-alpha-acetyltransferase 16, NatA auxiliary subunit (NMDA receptor-regulated 1-like protein) (NARG1-like protein)	SUGT1	Q9Y2Z0	SGT1	Protein SGT1 homolog (Protein 40-6-3) (Sgt1) (Suppressor of G2 allele of SKP1 homolog)	0.915377	18	1.01e-07	0.692895	34	5.59e-06	0.222481	-0.78411
184720	663-O75369_FLNB,X1417.P15408_FOSL2	FLNB	O75369	FLNB	Filamin-B (FLN-B) (ABP-278) (ABP-280 homolog) (Actin-binding-like protein) (Beta-filamin) (Filamin homolog 1) (Fh1) (Filamin-3) (Thyroid autoantigen) (Truncated actin-binding protein) (Truncated ABP)	FOSL2	P15408	FOSL2	Fos-related antigen 2 (FRA-2)	0.905882	16	1.36e-06	0.684677	31	2.15e-05	0.221205	-0.79009
106167	372-O43150_ASAP2,X6313.Q9GZP8_IMUP	ASAP2	O43150	ASAP2	Arf-GAP with SH3 domain, ANK repeat and PH domain-containing protein 2 (Development and differentiation-enhancing factor 2) (Paxillin-associated protein with ARF GAP activity 3) (PAG3) (Pyk2 C-terminus-associated protein) (PAP)	IMUP	Q9GZP8	IMUP	Immortalization up-regulated protein (Hepatocyte growth factor activator inhibitor type 2-related small protein) (H2RSP) (HAI-2-related small protein)	0.907121	18	2.07e-07	0.687395	34	7.09e-06	0.219726	-0.79702
882822	3928-Q6BCY4_NB5R2,X5552.Q96F46_I17RA	CYB5R2	Q6BCY4	NB5R2	NADH-cytochrome b5 reductase 2 (b5R.2) (EC 1.6.2.2)	IL17RA	Q96F46	I17RA	Interleukin-17 receptor A (IL-17 receptor A) (IL-17RA) (CDw217) (CD antigen CD217)	0.951515	10	2.28e-05	0.732468	21	0.000159592	0.219048	-0.8002
13038	49-A6NHL2_TBAL3,X3463.Q16270_IBP7	TUBAL3	A6NHL2	TBAL3	Tubulin alpha chain-like 3 (EC 3.6.5.-)	IGFBP7	Q16270	IBP7	Insulin-like growth factor-binding protein 7 (IBP-7) (IGF-binding protein 7) (IGFBP-7) (IGFBP-rP1) (MAC25 protein) (PGI2-stimulating factor) (Prostacyclin-stimulating factor) (Tumor-derived adhesion factor) (TAF)	0.910714	15	2.4e-06	0.692102	30	2.27e-05	0.218612	-0.80224
481881	1800-P30622_CLIP1,X7911.Q9Y6E2_BZW2	CLIP1	P30622	CLIP1	CAP-Gly domain-containing linker protein 1 (Cytoplasmic linker protein 1) (Cytoplasmic linker protein 170 alpha-2) (CLIP-170) (Reed-Sternberg intermediate filament-associated protein) (Restin)	BZW2	Q9Y6E2	BZW2	eIF5-mimic protein 1 (Basic leucine zipper and W2 domain-containing protein 2)	0.905057	18	2.46e-07	0.686784	34	7.28e-06	0.218273	-0.80383
962779	4539-Q8IVU3_HERC6,X4606.Q8IY21_DDX60	HERC6	Q8IVU3	HERC6	Probable E3 ubiquitin-protein ligase HERC6 (EC 2.3.2.26) (HECT domain and RCC1-like domain-containing protein 6) (HECT-type E3 ubiquitin transferase HERC6)	DDX60	Q8IY21	DDX60	Probable ATP-dependent RNA helicase DDX60 (EC 3.6.4.13) (DEAD box protein 60)	0.954592	18	7.88e-10	0.737204	34	6.6e-07	0.217388	-0.80797
627475	2469-P60903_S10AA,X3510.Q16787_LAMA3	S100A10	P60903	S10AA	Protein S100-A10 (Calpactin I light chain) (Calpactin-1 light chain) (Cellular ligand of annexin II) (S100 calcium-binding protein A10) (p10 protein) (p11)	LAMA3	Q16787	LAMA3	Laminin subunit alpha-3 (Epiligrin 170 kDa subunit) (E170) (Epiligrin subunit alpha) (Kalinin subunit alpha) (Laminin-5 subunit alpha) (Laminin-6 subunit alpha) (Laminin-7 subunit alpha) (Nicein subunit alpha)	0.900929	18	3.41e-07	0.683728	34	8.3e-06	0.217201	-0.80885
324943	1178-P08138_TNR16,X7613.Q9Y243_AKT3	NGFR	P08138	TNR16	Tumor necrosis factor receptor superfamily member 16 (Gp80-LNGFR) (Low affinity neurotrophin receptor p75NTR) (Low-affinity nerve growth factor receptor) (NGF receptor) (p75 ICD) (CD antigen CD271)	AKT3	Q9Y243	AKT3	RAC-gamma serine/threonine-protein kinase (EC 2.7.11.1) (Protein kinase Akt-3) (Protein kinase B gamma) (PKB gamma) (RAC-PK-gamma) (STK-2)	1	4	0	0.783333	9	0.0125199	0.216667	-0.81135
764755	3169-Q14126_DSG2,X3747.Q5R3I4_TTC38	DSG2	Q14126	DSG2	Desmoglein-2 (Cadherin family member 5) (HDGC)	TTC38	Q5R3I4	TTC38	Tetratricopeptide repeat protein 38 (TPR repeat protein 38)	0.917441	18	8.36e-08	0.701452	34	3.81e-06	0.215989	-0.81453
981070	4700-Q8N302_AGGF1,X7500.Q9ULT6_ZNRF3	AGGF1	Q8N302	AGGF1	Angiogenic factor with G patch and FHA domains 1 (Angiogenic factor VG5Q) (hVG5Q) (G patch domain-containing protein 7) (Vasculogenesis gene on 5q protein)	ZNRF3	Q9ULT6	ZNRF3	E3 ubiquitin-protein ligase ZNRF3 (EC 2.3.2.27) (RING finger protein 203) (RING-type E3 ubiquitin transferase ZNRF3) (Zinc/RING finger protein 3)	0.928571	7	0.00251947	0.714286	13	0.0060883	0.214286	-0.82251
61741	224-O14757_CHK1,X7102.Q9NZJ0_DTL	CHEK1	O14757	CHK1	Serine/threonine-protein kinase Chk1 (EC 2.7.11.1) (CHK1 checkpoint homolog) (Cell cycle checkpoint kinase) (Checkpoint kinase-1)	DTL	Q9NZJ0	DTL	Denticleless protein homolog (DDB1- and CUL4-associated factor 2) (Lethal(2) denticleless protein homolog) (Retinoic acid-regulated nuclear matrix-associated protein)	0.917441	18	8.36e-08	0.705118	34	3.22e-06	0.212322	-0.83171
901100	4063-Q6PCB8_EMB,X5773.Q96PU8_QKI	EMB	Q6PCB8	EMB	Embigin	QKI	Q96PU8	QKI	Protein quaking (Hqk) (HqkI)	0.90303	10	0.000343612	0.690909	21	0.000524751	0.212121	-0.83265
288868	1051-P02753_RET4,X1503.P18085_ARF4	RBP4	P02753	RET4	Retinol-binding protein 4 (Plasma retinol-binding protein) (PRBP) (RBP) [Cleaved into: Plasma retinol-binding protein(1-182); Plasma retinol-binding protein(1-181); Plasma retinol-binding protein(1-179); Plasma retinol-binding protein(1-176)]	ARF4	P18085	ARF4	ADP-ribosylation factor 4	0.927273	10	0.000112035	0.715415	22	0.000181968	0.211858	-0.83389
802126	3397-Q15468_STIL,X7902.Q9Y6A5_TACC3	STIL	Q15468	STIL	SCL-interrupting locus protein (TAL-1-interrupting locus protein)	TACC3	Q9Y6A5	TACC3	Transforming acidic coiled-coil-containing protein 3 (ERIC-1)	0.905057	18	2.46e-07	0.693812	34	5.36e-06	0.211245	-0.83676
651761	2573-P62861_RS30,X4751.Q8N5C6_SRBD1	FAU	P62861	RS30	FAU ubiquitin-like and ribosomal protein S30 [Cleaved into: Ubiquitin-like protein FUBI; 40S ribosomal protein S30 (Small ribosomal subunit protein eS30)]	SRBD1	Q8N5C6	SRBD1	S1 RNA-binding domain-containing protein 1	0.909185	18	1.74e-07	0.699618	34	4.14e-06	0.209567	-0.84462
858907	3755-Q5SRE5_NU188,X5115.Q8WUQ7_CATIN	NUP188	Q5SRE5	NU188	Nucleoporin NUP188 (hNup188)	CACTIN	Q8WUQ7	CATIN	Cactin (Renal carcinoma antigen NY-REN-24)	0.915377	18	1.01e-07	0.706035	34	3.09e-06	0.209342	-0.84568
955624	4481-Q86Y91_KI18B,X4909.Q8NEM2_SHCBP	KIF18B	Q86Y91	KI18B	Kinesin-like protein KIF18B	SHCBP1	Q8NEM2	SHCBP	SHC SH2 domain-binding protein 1	0.916484	14	4.08e-06	0.711002	28	2.23e-05	0.205482	-0.86377
550236	2095-P47989_XDH,X2956.Q12931_TRAP1	XDH	P47989	XDH	Xanthine dehydrogenase/oxidase [Includes: Xanthine dehydrogenase (XD) (EC 1.17.1.4); Xanthine oxidase (XO) (EC 1.17.3.2) (Xanthine oxidoreductase) (XOR)]	TRAP1	Q12931	TRAP1	Heat shock protein 75 kDa, mitochondrial (HSP 75) (TNFR-associated protein 1) (Tumor necrosis factor type 1 receptor-associated protein) (TRAP-1)	0.93956	13	1.88e-06	0.738001	22	8.83e-05	0.201559	-0.88215
233174	841-O94929_ABLM3,X4198.Q6ZV73_FGD6	ABLIM3	O94929	ABLM3	Actin-binding LIM protein 3 (abLIM-3) (Actin-binding LIM protein family member 3)	FGD6	Q6ZV73	FGD6	FYVE, RhoGEF and PH domain-containing protein 6 (Zinc finger FYVE domain-containing protein 24)	0.902993	18	2.9e-07	0.703591	34	3.46e-06	0.199402	-0.89225
1088725	5820-Q96RT1_ERBIN,X6486.Q9H4M9_EHD1	ERBIN	Q96RT1	ERBIN	Erbin (Densin-180-like protein) (Erbb2-interacting protein) (Protein LAP2)	EHD1	Q9H4M9	EHD1	EH domain-containing protein 1 (PAST homolog 1) (hPAST1) (Testilin)	0.921569	18	5.62e-08	0.724064	34	1.3e-06	0.197504	-0.90115
193267	695-O75489_NDUS3,X1531.P19404_NDUV2	NDUFS3	O75489	NDUS3	NADH dehydrogenase [ubiquinone] iron-sulfur protein 3, mitochondrial (EC 7.1.1.2) (Complex I-30kD) (CI-30kD) (NADH-ubiquinone oxidoreductase 30 kDa subunit)	NDUFV2	P19404	NDUV2	NADH dehydrogenase [ubiquinone] flavoprotein 2, mitochondrial (EC 7.1.1.2) (NADH-ubiquinone oxidoreductase 24 kDa subunit)	0.905057	18	2.46e-07	0.710924	34	2.46e-06	0.194132	-0.91695
31474	118-O00291_HIP1,X7298.Q9UGR2_Z3H7B	HIP1	O00291	HIP1	Huntingtin-interacting protein 1 (HIP-1) (Huntingtin-interacting protein I) (HIP-I)	ZC3H7B	Q9UGR2	Z3H7B	Zinc finger CCCH domain-containing protein 7B (Rotavirus 'X'-associated non-structural protein) (RoXaN)	0.907121	18	2.07e-07	0.715814	34	1.94e-06	0.191307	-0.93019
835261	3603-Q460N5_PAR14,X7924.Q9Y6K5_OAS3	PARP14	Q460N5	PAR14	Protein mono-ADP-ribosyltransferase PARP14 (EC 2.4.2.-) (ADP-ribosyltransferase diphtheria toxin-like 8) (ARTD8) (B aggressive lymphoma protein 2) (Poly [ADP-ribose] polymerase 14) (PARP-14)	OAS3	Q9Y6K5	OAS3	2'-5'-oligoadenylate synthase 3 ((2-5')oligo(A) synthase 3) (2-5A synthase 3) (EC 2.7.7.84) (p100 OAS) (p100OAS)	0.915377	18	1.01e-07	0.724675	34	1.26e-06	0.190701	-0.93303
918206	4192-Q6ZU35_CRACD,X6678.Q9HC44_GPBL1	CRACD	Q6ZU35	CRACD	Capping protein-inhibiting regulator of actin dynamics (Cancer-related regulator of actin dynamics)	GPBP1L1	Q9HC44	GPBL1	Vasculin-like protein 1 (GC-rich promoter-binding protein 1-like 1)	0.90303	10	0.000343612	0.713156	22	0.000194882	0.189874	-0.9369
921976	4220-Q71F23_CENPU,X7902.Q9Y6A5_TACC3	CENPU	Q71F23	CENPU	Centromere protein U (CENP-U) (Centromere protein of 50 kDa) (CENP-50) (Interphase centromere complex protein 24) (KSHV latent nuclear antigen-interacting protein 1) (MLF1-interacting protein) (Polo-box-interacting protein 1)	TACC3	Q9Y6A5	TACC3	Transforming acidic coiled-coil-containing protein 3 (ERIC-1)	0.933952	18	1.48e-08	0.744843	34	4.38e-07	0.189109	-0.94049
1088343	5816-Q96RR1_PEO1,X6678.Q9HC44_GPBL1	TWNK	Q96RR1	PEO1	Twinkle mtDNA helicase (EC 3.6.4.12) (Progressive external ophthalmoplegia 1 protein) (T7 gp4-like protein with intramitochondrial nucleoid localization) (T7-like mitochondrial DNA helicase) (Twinkle protein, mitochondrial)	GPBP1L1	Q9HC44	GPBL1	Vasculin-like protein 1 (GC-rich promoter-binding protein 1-like 1)	0.90303	10	0.000343612	0.715415	22	0.000181968	0.187615	-0.94749
418485	1541-P19801_AOC1,X2194.P50135_HNMT	AOC1	P19801	AOC1	Amiloride-sensitive amine oxidase [copper-containing] (DAO) (Diamine oxidase) (EC 1.4.3.22) (Amiloride-binding protein 1) (Amine oxidase copper domain-containing protein 1) (Histaminase) (Kidney amine oxidase) (KAO)	HNMT	P50135	HNMT	Histamine N-methyltransferase (HMT) (EC 2.1.1.8)	0.919505	18	6.87e-08	0.73262	34	8.39e-07	0.186884	-0.95091
565011	2158-P49642_PRI1,X6678.Q9HC44_GPBL1	PRIM1	P49642	PRI1	DNA primase small subunit (EC 2.7.7.102) (DNA primase 49 kDa subunit) (p49)	GPBP1L1	Q9HC44	GPBL1	Vasculin-like protein 1 (GC-rich promoter-binding protein 1-like 1)	0.90303	10	0.000343612	0.716544	22	0.000175793	0.186486	-0.95278
709128	2855-Q07654_TFF3,X4544.Q8IW45_NNRD	TFF3	Q07654	TFF3	Trefoil factor 3 (Intestinal trefoil factor) (hITF) (Polypeptide P1.B) (hP1.B)	NAXD	Q8IW45	NNRD	ATP-dependent (S)-NAD(P)H-hydrate dehydratase (EC 4.2.1.93) (ATP-dependent NAD(P)HX dehydratase) (Carbohydrate kinase domain-containing protein) (NAD(P)HX dehydratase)	0.909091	11	0.000105593	0.723308	20	0.000313403	0.185783	-0.95608
326962	1185-P08240_SRPRA,X4806.Q8N961_ABTB2	SRPRA	P08240	SRPRA	Signal recognition particle receptor subunit alpha (SR-alpha) (Docking protein alpha) (DP-alpha)	ABTB2	Q8N961	ABTB2	Ankyrin repeat and BTB/POZ domain-containing protein 2	0.915152	10	0.000204472	0.731169	21	0.00016617	0.183983	-0.96451
922897	4226-Q75QN2_INT8,X7052.Q9NY47_CA2D2	INTS8	Q75QN2	INT8	Integrator complex subunit 8 (Int8) (Protein kaonashi-1)	CACNA2D2	Q9NY47	CA2D2	Voltage-dependent calcium channel subunit alpha-2/delta-2 (Voltage-gated calcium channel subunit alpha-2/delta-2) [Cleaved into: Voltage-dependent calcium channel subunit alpha-2-2; Voltage-dependent calcium channel subunit delta-2]	0.9	15	4.87e-06	0.720342	26	3.33e-05	0.179658	-0.98478
250559	902-O95342_ABCBB,X1215.P09327_VILI	ABCB11	O95342	ABCBB	Bile salt export pump (EC 7.6.2.-) (ATP-binding cassette sub-family B member 11)	VIL1	P09327	VILI	Villin-1	0.915377	18	1.01e-07	0.741176	34	5.34e-07	0.1742	-1.01035
403149	1486-P17677_NEUM,X7272.Q9UEE9_CFDP1	GAP43	P17677	NEUM	Neuromodulin (Axonal membrane protein GAP-43) (Growth-associated protein 43) (Neural phosphoprotein B-50) (pp46)	CFDP1	Q9UEE9	CFDP1	Craniofacial development protein 1 (Bucentaur)	0.944056	12	3.93e-06	0.770751	23	1.68e-05	0.173305	-1.01455
1030	5-A0AVI4_TM129,X1029.P01024_CO3	TMEM129	A0AVI4	TM129	E3 ubiquitin-protein ligase TM129 (EC 2.3.2.27) (RING-type E3 ubiquitin transferase TM129)	C3	P01024	CO3	Complement C3 (C3 and PZP-like alpha-2-macroglobulin domain-containing protein 1) [Cleaved into: Complement C3 beta chain; C3-beta-c (C3bc); Complement C3 alpha chain; C3a anaphylatoxin; Acylation stimulating protein (ASP) (C3adesArg); Complement C3b alpha' chain; Complement C3c alpha' chain fragment 1; Complement C3dg fragment; Complement C3g fragment; Complement C3d fragment; Complement C3f fra…	0.909091	11	0.000105593	0.738961	21	0.000129961	0.17013	-1.02942
564536	2156-P49638_TTPA,X4700.Q8N302_AGGF1	TTPA	P49638	TTPA	Alpha-tocopherol transfer protein (Alpha-TTP)	AGGF1	Q8N302	AGGF1	Angiogenic factor with G patch and FHA domains 1 (Angiogenic factor VG5Q) (hVG5Q) (G patch domain-containing protein 7) (Vasculogenesis gene on 5q protein)	1	4	0	0.833333	8	0.0101755	0.166667	-1.04565
235367	848-O94972_TRI37,X6856.Q9NRZ9_HELLS	TRIM37	O94972	TRI37	E3 ubiquitin-protein ligase TRIM37 (EC 2.3.2.27) (Mulibrey nanism protein) (RING-type E3 ubiquitin transferase TRIM37) (Tripartite motif-containing protein 37)	HELLS	Q9NRZ9	HELLS	Lymphoid-specific helicase (EC 3.6.4.-) (Proliferation-associated SNF2-like protein) (SWI/SNF2-related matrix-associated actin-dependent regulator of chromatin subfamily A member 6)	0.917582	13	9.91e-06	0.753162	26	8.98e-06	0.16442	-1.05618
1047724	5346-Q93099_HGD,X7018.Q9NX57_RAB20	HGD	Q93099	HGD	Homogentisate 1,2-dioxygenase (EC 1.13.11.5) (Homogentisate oxygenase) (Homogentisic acid oxidase) (Homogentisicase)	RAB20	Q9NX57	RAB20	Ras-related protein Rab-20	0.901961	17	7.5e-07	0.739639	33	8.75e-07	0.162322	-1.06601
393931	1446-P16422_EPCAM,X3242.Q14623_IHH	EPCAM	P16422	EPCAM	Epithelial cell adhesion molecule (Ep-CAM) (Adenocarcinoma-associated antigen) (Cell surface glycoprotein Trop-1) (Epithelial cell surface antigen) (Epithelial glycoprotein) (EGP) (Epithelial glycoprotein 314) (EGP314) (hEGP314) (KS 1/4 antigen) (KSA) (Major gastrointestinal tumor-associated protein GA733-2) (Tumor-associated calcium signal transducer 1) (CD antigen CD326)	IHH	Q14623	IHH	Indian hedgehog protein (IHH) (EC 3.1.-.-) (HHG-2) [Cleaved into: Indian hedgehog protein N-product]	0.923077	12	1.86e-05	0.761368	26	6.27e-06	0.161709	-1.06888
487510	1825-P31939_PUR9,X4729.Q8N4H5_TOM5	ATIC	P31939	PUR9	Bifunctional purine biosynthesis protein ATIC (AICAR transformylase/inosine monophosphate cyclohydrolase) (ATIC) [Cleaved into: Bifunctional purine biosynthesis protein ATIC, N-terminally processed] [Includes: Phosphoribosylaminoimidazolecarboxamide formyltransferase (EC 2.1.2.3) (5-aminoimidazole-4-carboxamide ribonucleotide formyltransferase) (AICAR formyltransferase) (AICAR transformylase); In…	TOMM5	Q8N4H5	TOM5	Mitochondrial import receptor subunit TOM5 homolog	0.911249	18	1.46e-07	0.750955	34	3.12e-07	0.160294	-1.07552
381899	1397-P14921_ETS1,X4698.Q8N2S1_LTBP4	ETS1	P14921	ETS1	Protein C-ets-1 (p54)	LTBP4	Q8N2S1	LTBP4	Latent-transforming growth factor beta-binding protein 4 (LTBP-4)	0.942857	6	0.00480466	0.783217	12	0.00258622	0.15964	-1.07858
103046	363-O15533_TPSN,X2797.Q03519_TAP2	TAPBP	O15533	TPSN	Tapasin (TPN) (TPSN) (NGS-17) (TAP-associated protein) (TAP-binding protein)	TAP2	Q03519	TAP2	Antigen peptide transporter 2 (APT2) (EC 7.4.2.-) (ATP-binding cassette sub-family B member 3) (Peptide supply factor 2) (Peptide transporter PSF2) (PSF-2) (Peptide transporter TAP2) (Peptide transporter involved in antigen processing 2) (Really interesting new gene 11 protein) (RING11)	0.944272	18	3.92e-09	0.78518	34	3.83e-08	0.159093	-1.08114
817760	3495-Q16656_NRF1,X4502.Q8IUE6_H2A2B	NRF1	Q16656	NRF1	Nuclear respiratory factor 1 (NRF-1) (Alpha palindromic-binding protein) (Alpha-pal)	H2AC21	Q8IUE6	H2A2B	Histone H2A type 2-B (H2A-clustered histone 21)	0.919505	18	6.87e-08	0.760733	34	1.77e-07	0.158771	-1.08265
637436	2513-P61927_RL37,X2570.P62851_RS25	RPL37	P61927	RL37	60S ribosomal protein L37 (G1.16) (Large ribosomal subunit protein eL37)	RPS25	P62851	RS25	40S ribosomal protein S25 (Small ribosomal subunit protein eS25)	0.956656	18	5.47e-10	0.799236	34	1.45e-08	0.15742	-1.08898
930605	4287-Q7Z2W9_RM21,X5212.Q92506_DHB8	MRPL21	Q7Z2W9	RM21	39S ribosomal protein L21, mitochondrial (L21mt) (MRP-L21) (Mitochondrial large ribosomal subunit protein bL21m)	HSD17B8	Q92506	DHB8	(3R)-3-hydroxyacyl-CoA dehydrogenase (EC 1.1.1.n12) (17-beta-hydroxysteroid dehydrogenase 8) (17-beta-HSD 8) (HSD17B8) (3-ketoacyl-[acyl-carrier-protein] reductase alpha subunit) (KAR alpha subunit) (3-oxoacyl-[acyl-carrier-protein] reductase) (Estradiol 17-beta-dehydrogenase 8) (EC 1.1.1.62) (Protein Ke6) (Ke6) (Short chain dehydrogenase/reductase family 30C member 1) (Testosterone 17-beta-dehyd…	0.902993	18	2.9e-07	0.74576	34	4.16e-07	0.157233	-1.08986
71611	255-O14965_AURKA,X5024.Q8TCT9_HM13	AURKA	O14965	AURKA	Aurora kinase A (EC 2.7.11.1) (Aurora 2) (Aurora/IPL1-related kinase 1) (ARK-1) (Aurora-related kinase 1) (Breast tumor-amplified kinase) (Ipl1- and aurora-related kinase 1) (Serine/threonine-protein kinase 15) (Serine/threonine-protein kinase 6) (Serine/threonine-protein kinase Ayk1) (Serine/threonine-protein kinase aurora-A)	HM13	Q8TCT9	HM13	Minor histocompatibility antigen H13 (EC 3.4.23.-) (Intramembrane protease 1) (IMP-1) (IMPAS-1) (hIMP1) (Presenilin-like protein 3) (Signal peptide peptidase)	0.919505	18	6.87e-08	0.763789	34	1.48e-07	0.155715	-1.09697
843315	3655-Q53GT1_KLH22,X5765.Q96PE3_INP4A	KLHL22	Q53GT1	KLH22	Kelch-like protein 22	INPP4A	Q96PE3	INP4A	Inositol polyphosphate-4-phosphatase type I A (Inositol polyphosphate 4-phosphatase type I) (Type I inositol 3,4-bisphosphate 4-phosphatase) (EC 3.1.3.66)	0.901099	13	2.61e-05	0.745906	22	6.74e-05	0.155193	-1.09942
368910	1346-P13196_HEM1,X3666.Q53RE8_ANR39	ALAS1	P13196	HEM1	5-aminolevulinate synthase, non-specific, mitochondrial (ALAS-H) (EC 2.3.1.37) (5-aminolevulinic acid synthase 1) (Delta-ALA synthase 1) (Delta-aminolevulinate synthase 1)	ANKRD39	Q53RE8	ANR39	Ankyrin repeat domain-containing protein 39	0.909091	12	4.19e-05	0.754941	23	3.14e-05	0.15415	-1.1043
122701	435-O43542_XRCC3,X7522.Q9UMW8_UBP18	XRCC3	O43542	XRCC3	DNA repair protein XRCC3 (X-ray repair cross-complementing protein 3)	USP18	Q9UMW8	UBP18	Ubl carboxyl-terminal hydrolase 18 (EC 3.4.19.-) (43 kDa ISG15-specific protease) (hUBP43) (ISG15-specific-processing protease) (Ubl thioesterase 18)	0.90303	10	0.000343612	0.749123	19	0.000223207	0.153907	-1.10544
332110	1203-P08865_RSSA,X2576.P62879_GBB2	RPSA	P08865	RSSA	40S ribosomal protein SA (37 kDa laminin receptor precursor) (37LRP) (37/67 kDa laminin receptor) (LRP/LR) (67 kDa laminin receptor) (67LR) (Colon carcinoma laminin-binding protein) (Laminin receptor 1) (LamR) (Laminin-binding protein precursor p40) (LBP/p40) (Multidrug resistance-associated protein MGr1-Ag) (NEM/1CHD4) (Small ribosomal subunit protein uS2)	GNB2	P62879	GBB2	Guanine nucleotide-binding protein G(I)/G(S)/G(T) subunit beta-2 (G protein subunit beta-2) (Transducin beta chain 2)	0.905057	18	2.46e-07	0.752788	34	2.81e-07	0.152268	-1.11312
764711	3169-Q14126_DSG2,X3188.Q14165_MLEC	DSG2	Q14126	DSG2	Desmoglein-2 (Cadherin family member 5) (HDGC)	MLEC	Q14165	MLEC	Malectin	0.905057	18	2.46e-07	0.757983	34	2.08e-07	0.147074	-1.13747
548846	2090-P47902_CDX1,X3169.Q14126_DSG2	CDX1	P47902	CDX1	Homeobox protein CDX-1 (Caudal-type homeobox protein 1)	DSG2	Q14126	DSG2	Desmoglein-2 (Cadherin family member 5) (HDGC)	0.919505	18	6.87e-08	0.773262	34	8.28e-08	0.146243	-1.14136
26645	103-O00212_RHOD,X7032.Q9NXG6_P4HTM	RHOD	O00212	RHOD	Rho-related GTP-binding protein RhoD (Rho-related protein HP1) (RhoHP1)	P4HTM	Q9NXG6	P4HTM	Transmembrane prolyl 4-hydroxylase (P4H-TM) (EC 1.14.11.29) (Hypoxia-inducible factor prolyl hydroxylase 4) (HIF-PH4) (HIF-prolyl hydroxylase 4) (HPH-4)	0.942857	6	0.00480466	0.797203	12	0.00190037	0.145654	-1.14412
723873	2939-Q12864_CAD17,X7263.Q9UD71_PPR1B	CDH17	Q12864	CAD17	Cadherin-17 (Intestinal peptide-associated transporter HPT-1) (Liver-intestine cadherin) (LI-cadherin)	PPP1R1B	Q9UD71	PPR1B	Protein phosphatase 1 regulatory subunit 1B (DARPP-32) (Dopamine- and cAMP-regulated neuronal phosphoprotein)	0.900929	18	3.41e-07	0.75615	34	2.32e-07	0.144779	-1.14822
385335	1412-P15313_VATB1,X3625.Q4L180_FIL1L	ATP6V1B1	P15313	VATB1	V-type proton ATPase subunit B, kidney isoform (V-ATPase subunit B 1) (Endomembrane proton pump 58 kDa subunit) (Vacuolar proton pump subunit B 1)	FILIP1L	Q4L180	FIL1L	Filamin A-interacting protein 1-like (130 kDa GPBP-interacting protein) (90 kDa GPBP-interacting protein) (Protein down-regulated in ovarian cancer 1) (DOC-1)	0.902098	12	6e-05	0.757949	26	7.29e-06	0.144149	-1.15117
772196	3212-Q14289_FAK2,X6277.Q9C002_NMES1	PTK2B	Q14289	FAK2	Protein-tyrosine kinase 2-beta (EC 2.7.10.2) (Calcium-dependent tyrosine kinase) (CADTK) (Calcium-regulated non-receptor proline-rich tyrosine kinase) (Cell adhesion kinase beta) (CAK-beta) (CAKB) (Focal adhesion kinase 2) (FADK 2) (Proline-rich tyrosine kinase 2) (Related adhesion focal tyrosine kinase) (RAFTK)	NMES1	Q9C002	NMES1	Normal mucosa of esophagus-specific gene 1 protein (Protein FOAP-11)	0.907121	18	2.07e-07	0.763789	34	1.48e-07	0.143332	-1.155
48543	181-O00762_UBE2C,X255.O14965_AURKA	UBE2C	O00762	UBE2C	Ubiquitin-conjugating enzyme E2 C (EC 2.3.2.23) ((E3-independent) E2 ubiquitin-conjugating enzyme C) (EC 2.3.2.24) (E2 ubiquitin-conjugating enzyme C) (UbcH10) (Ubiquitin carrier protein C) (Ubiquitin-protein ligase C)	AURKA	O14965	AURKA	Aurora kinase A (EC 2.7.11.1) (Aurora 2) (Aurora/IPL1-related kinase 1) (ARK-1) (Aurora-related kinase 1) (Breast tumor-amplified kinase) (Ipl1- and aurora-related kinase 1) (Serine/threonine-protein kinase 15) (Serine/threonine-protein kinase 6) (Serine/threonine-protein kinase Ayk1) (Serine/threonine-protein kinase aurora-A)	0.929825	18	2.37e-08	0.790374	34	2.7e-08	0.13945	-1.17319
600626	2332-P53597_SUCA,X5169.Q8WWV3_RT4I1	SUCLG1	P53597	SUCA	Succinate--CoA ligase [ADP/GDP-forming] subunit alpha, mitochondrial (EC 6.2.1.4) (EC 6.2.1.5) (Succinyl-CoA synthetase subunit alpha) (SCS-alpha)	RTN4IP1	Q8WWV3	RT4I1	Reticulon-4-interacting protein 1, mitochondrial (NOGO-interacting mitochondrial protein)	0.921569	18	5.62e-08	0.783652	34	4.24e-08	0.137917	-1.18037
343594	1243-Q71UI9_H2AV,X2513.P61927_RL37	H2AZ2	Q71UI9	H2AV	Histone H2A.V (H2A.F/Z) (H2A.Z variant histone 2)	RPL37	P61927	RL37	60S ribosomal protein L37 (G1.16) (Large ribosomal subunit protein eL37)	0.925697	18	3.69e-08	0.790069	34	2.75e-08	0.135628	-1.1911
94183	335-O15371_EIF3D,X1504.P18124_RL7	EIF3D	O15371	EIF3D	Eukaryotic translation initiation factor 3 subunit D (eIF3d) (Eukaryotic translation initiation factor 3 subunit 7) (eIF-3-zeta) (eIF3 p66)	RPL7	P18124	RL7	60S ribosomal protein L7 (Large ribosomal subunit protein uL30)	0.909185	18	1.74e-07	0.775707	34	7.1e-08	0.133478	-1.20117
15727	59-A6ZKI3_RTL8C,X4949.Q8NG31_KNL1	RTL8C	A6ZKI3	RTL8C	Retrotransposon Gag-like protein 8C (Mammalian retrotransposon derived protein 8C)	KNL1	Q8NG31	KNL1	Kinetochore scaffold 1 (ALL1-fused gene from chromosome 15q14 protein) (AF15q14) (Bub-linking kinetochore protein) (Blinkin) (Cancer susceptibility candidate gene 5 protein) (Cancer/testis antigen 29) (CT29) (Kinetochore-null protein 1) (Protein CASC5) (Protein D40/AF15q14)	0.906593	13	1.93e-05	0.777527	22	2.06e-05	0.129067	-1.22185
314769	1141-P07148_FABPL,X1524.P19075_TSN8	FABP1	P07148	FABPL	Fatty acid-binding protein, liver (Fatty acid-binding protein 1) (Liver-type fatty acid-binding protein) (L-FABP)	TSPAN8	P19075	TSN8	Tetraspanin-8 (Tspan-8) (Transmembrane 4 superfamily member 3) (Tumor-associated antigen CO-029)	0.900929	18	3.41e-07	0.773262	34	8.28e-08	0.127667	-1.2284
890724	3986-Q6NSZ9_ZSC25,X4769.Q8N5S9_KKCC1	ZSCAN25	Q6NSZ9	ZSC25	Zinc finger and SCAN domain-containing protein 25 (Zinc finger protein 498)	CAMKK1	Q8N5S9	KKCC1	Calcium/calmodulin-dependent protein kinase kinase 1 (CaM-KK 1) (CaM-kinase kinase 1) (CaMKK 1) (EC 2.7.11.17) (CaM-kinase IV kinase) (Calcium/calmodulin-dependent protein kinase kinase alpha) (CaM-KK alpha) (CaM-kinase kinase alpha) (CaMKK alpha)	0.915152	10	0.000204472	0.788312	21	2.19e-05	0.12684	-1.23228
185315	665-O75380_NDUS6,X896.O95298_NDUC2	NDUFS6	O75380	NDUS6	NADH dehydrogenase [ubiquinone] iron-sulfur protein 6, mitochondrial (Complex I-13kD-A) (CI-13kD-A) (NADH-ubiquinone oxidoreductase 13 kDa-A subunit)	NDUFC2	O95298	NDUC2	NADH dehydrogenase [ubiquinone] 1 subunit C2 (Complex I-B14.5b) (CI-B14.5b) (Human lung cancer oncogene 1 protein) (HLC-1) (NADH-ubiquinone oxidoreductase subunit B14.5b)	0.923633	18	4.57e-08	0.798014	34	1.58e-08	0.125619	-1.238
104611	369-O43143_DHX15,X1357.P13667_PDIA4	DHX15	O43143	DHX15	ATP-dependent RNA helicase DHX15 (EC 3.6.4.13) (ATP-dependent RNA helicase #46) (DEAH box protein 15) (Splicing factor Prp43) (hPrp43)	PDIA4	P13667	PDIA4	Protein disulfide-isomerase A4 (EC 5.3.4.1) (Endoplasmic reticulum resident protein 70) (ER protein 70) (ERp70) (Endoplasmic reticulum resident protein 72) (ER protein 72) (ERp-72) (ERp72)	0.911249	18	1.46e-07	0.787319	34	3.32e-08	0.12393	-1.24591
695550	2783-Q03112_MECOM,X6000.Q9BQS7_HEPH	MECOM	Q03112	MECOM	Histone-lysine N-methyltransferase MECOM (EC 2.1.1.367) (Ecotropic virus integration site 1 protein homolog) (EVI-1) (MDS1 and EVI1 complex locus protein) (Myelodysplasia syndrome 1 protein) (Myelodysplasia syndrome-associated protein 1)	HEPH	Q9BQS7	HEPH	Hephaestin (EC 1.-.-.-)	0.907121	18	2.07e-07	0.784874	34	3.91e-08	0.122247	-1.2538
677711	2694-P98095_FBLN2,X4525.Q8IVF7_FMNL3	FBLN2	P98095	FBLN2	Fibulin-2 (FIBL-2)	FMNL3	Q8IVF7	FMNL3	Formin-like protein 3 (Formin homology 2 domain-containing protein 3) (WW domain-binding protein 3) (WBP-3)	0.928571	8	0.000862968	0.806373	17	9.24e-05	0.122199	-1.25403
66688	241-O14879_IFIT3,X1236.P09913_IFIT2	IFIT3	O14879	IFIT3	Interferon-induced protein with tetratricopeptide repeats 3 (IFIT-3) (CIG49) (ISG-60) (Interferon-induced 60 kDa protein) (IFI-60K) (Interferon-induced protein with tetratricopeptide repeats 4) (IFIT-4) (Retinoic acid-induced gene G protein) (P60) (RIG-G)	IFIT2	P09913	IFIT2	Interferon-induced protein with tetratricopeptide repeats 2 (IFIT-2) (ISG-54 K) (Interferon-induced 54 kDa protein) (IFI-54K) (P54)	0.923633	18	4.57e-08	0.805959	34	8.84e-09	0.117674	-1.27523
844629	3662-Q53HL2_BOREA,X7444.Q9UKT4_FBX5	CDCA8	Q53HL2	BOREA	Borealin (Cell division cycle-associated protein 8) (Dasra-B) (hDasra-B) (Pluripotent embryonic stem cell-related gene 3 protein)	FBXO5	Q9UKT4	FBX5	F-box only protein 5 (Early mitotic inhibitor 1)	0.917857	15	1.42e-06	0.80197	29	1.69e-07	0.115887	-1.28361	Bottom10%
343689	1243-Q71UI9_H2AV,X3389.Q15428_SF3A2	H2AZ2	Q71UI9	H2AV	Histone H2A.V (H2A.F/Z) (H2A.Z variant histone 2)	SF3A2	Q15428	SF3A2	Splicing factor 3A subunit 2 (SF3a66) (Spliceosome-associated protein 62) (SAP 62)	0.913313	18	1.22e-07	0.799236	34	1.45e-08	0.114077	-1.29209	Bottom10%
548837	2090-P47902_CDX1,X2939.Q12864_CAD17	CDX1	P47902	CDX1	Homeobox protein CDX-1 (Caudal-type homeobox protein 1)	CDH17	Q12864	CAD17	Cadherin-17 (Intestinal peptide-associated transporter HPT-1) (Liver-intestine cadherin) (LI-cadherin)	0.913313	18	1.22e-07	0.802292	34	1.16e-08	0.111021	-1.30641	Bottom10%
650812	2570-P62851_RS25,X2791.Q03252_LMNB2	RPS25	P62851	RS25	40S ribosomal protein S25 (Small ribosomal subunit protein eS25)	LMNB2	Q03252	LMNB2	Lamin-B2	0.925697	18	3.69e-08	0.815126	34	4.38e-09	0.110571	-1.30852	Bottom10%
757224	3130-Q13751_LAMB3,X3131.Q13753_LAMC2	LAMB3	Q13751	LAMB3	Laminin subunit beta-3 (Epiligrin subunit bata) (Kalinin B1 chain) (Kalinin subunit beta) (Laminin B1k chain) (Laminin-5 subunit beta) (Nicein subunit beta)	LAMC2	Q13753	LAMC2	Laminin subunit gamma-2 (Cell-scattering factor 140 kDa subunit) (CSF 140 kDa subunit) (Epiligrin subunit gamma) (Kalinin subunit gamma) (Kalinin/nicein/epiligrin 100 kDa subunit) (Ladsin 140 kDa subunit) (Laminin B2t chain) (Laminin-5 subunit gamma) (Large adhesive scatter factor 140 kDa subunit) (Nicein subunit gamma)	0.960784	18	2.49e-10	0.856684	34	1.02e-10	0.1041	-1.33884	Bottom10%
637469	2513-P61927_RL37,X2791.Q03252_LMNB2	RPL37	P61927	RL37	60S ribosomal protein L37 (G1.16) (Large ribosomal subunit protein eL37)	LMNB2	Q03252	LMNB2	Lamin-B2	0.917441	18	8.36e-08	0.817265	34	3.69e-09	0.100176	-1.35723	Bottom10%
408147	1504-P18124_RL7,X1777.P30050_RL12	RPL7	P18124	RL7	60S ribosomal protein L7 (Large ribosomal subunit protein uL30)	RPL12	P30050	RL12	60S ribosomal protein L12 (Large ribosomal subunit protein uL11)	0.913313	18	1.22e-07	0.814515	34	4.59e-09	0.0987978	-1.36368	Bottom10%
155081	554-O60524_NEMF,X1513.P18621_RL17	NEMF	O60524	NEMF	Ribosome quality control complex subunit NEMF (Antigen NY-CO-1) (Nuclear export mediator factor) (Serologically defined colon cancer antigen 1)	RPL17	P18621	RL17	60S ribosomal protein L17 (60S ribosomal protein L23) (Large ribosomal subunit protein uL22) (PD-1)	0.911249	18	1.46e-07	0.813293	34	5.05e-09	0.0979561	-1.36763	Bottom10%
1015386	5013-Q8TCC3_RM30,X5581.Q96GC5_RM48	MRPL30	Q8TCC3	RM30	39S ribosomal protein L30, mitochondrial (L30mt) (MRP-L30) (39S ribosomal protein L28, mitochondrial) (L28mt) (MRP-L28) (Mitochondrial large ribosomal subunit protein uL30m)	MRPL48	Q96GC5	RM48	39S ribosomal protein L48, mitochondrial (L48mt) (MRP-L48) (Mitochondrial large ribosomal subunit protein mL48)	0.933952	18	1.48e-08	0.842934	34	3.99e-10	0.091019	-1.40013	Bottom10%
549096	2090-P47902_CDX1,X6435.Q9H329_E41LB	CDX1	P47902	CDX1	Homeobox protein CDX-1 (Caudal-type homeobox protein 1)	EPB41L4B	Q9H329	E41LB	Band 4.1-like protein 4B (Erythrocyte membrane protein band 4.1-like 4B) (FERM-containing protein CG1) (Protein EHM2)	0.942209	18	5.21e-09	0.852101	34	1.63e-10	0.0901077	-1.40441	Bottom10%
380366	1390-P14635_CCNB1,X6478.Q9H4H8_FA83D	CCNB1	P14635	CCNB1	G2/mitotic-specific cyclin-B1	FAM83D	Q9H4H8	FA83D	Protein FAM83D (Spindle protein CHICA)	0.915377	18	1.01e-07	0.826432	34	1.74e-09	0.0889443	-1.40986	Bottom10%
1086675	5799-Q96QT4_TRPM7,X7594.Q9UQ80_PA2G4	TRPM7	Q96QT4	TRPM7	Transient receptor potential cation channel subfamily M member 7 (EC 2.7.11.1) (Channel-kinase 1) (Long transient receptor potential channel 7) (LTrpC-7) (LTrpC7)	PA2G4	Q9UQ80	PA2G4	Proliferation-associated protein 2G4 (Cell cycle protein p38-2G4 homolog) (hG4-1) (ErbB3-binding protein 1)	0.911249	18	1.46e-07	0.822766	34	2.36e-09	0.0884832	-1.41202	Bottom10%
586461	2266-P51788_CLCN2,X4144.Q6UXY1_BI2L2	CLCN2	P51788	CLCN2	Chloride channel protein 2 (ClC-2)	BAIAP2L2	Q6UXY1	BI2L2	Brain-specific angiogenesis inhibitor 1-associated protein 2-like protein 2 (BAI1-associated protein 2-like protein 2) (Planar intestinal- and kidney-specific BAR domain protein) (Pinkbar)	0.909185	18	1.74e-07	0.826432	34	1.74e-09	0.0827523	-1.43887	Bottom10%
58206	213-O14686_KMT2D,X3257.Q14686_NCOA6	KMT2D	O14686	KMT2D	Histone-lysine N-methyltransferase 2D (Lysine N-methyltransferase 2D) (EC 2.1.1.364) (ALL1-related protein) (Myeloid/lymphoid or mixed-lineage leukemia protein 2)	NCOA6	Q14686	NCOA6	Nuclear receptor coactivator 6 (Activating signal cointegrator 2) (ASC-2) (Amplified in breast cancer protein 3) (Cancer-amplified transcriptional coactivator ASC-2) (Nuclear receptor coactivator RAP250) (NRC RAP250) (Nuclear receptor-activating protein, 250 kDa) (Peroxisome proliferator-activated receptor-interacting protein) (PPAR-interacting protein) (PRIP) (Thyroid hormone receptor-binding pr…	0.905057	18	2.46e-07	0.823682	34	2.19e-09	0.0813746	-1.44533	Bottom10%
648190	2559-P62750_RL23A,X2685.P84103_SRSF3	RPL23A	P62750	RL23A	60S ribosomal protein L23a (Large ribosomal subunit protein uL23)	SRSF3	P84103	SRSF3	Serine/arginine-rich splicing factor 3 (Pre-mRNA-splicing factor SRP20) (Splicing factor, arginine/serine-rich 3)	0.907121	18	2.07e-07	0.827349	34	1.61e-09	0.0797716	-1.45284	Bottom10%
722362	2932-Q12834_CDC20,X3397.Q15468_STIL	CDC20	Q12834	CDC20	Cell division cycle protein 20 homolog (p55CDC)	STIL	Q15468	STIL	SCL-interrupting locus protein (TAL-1-interrupting locus protein)	0.921569	18	5.62e-08	0.851795	34	1.68e-10	0.0697733	-1.49969	Bottom10%
632764	2494-P61254_RL26,X4459.Q86X55_CARM1	RPL26	P61254	RL26	60S ribosomal protein L26 (Large ribosomal subunit protein uL24)	CARM1	Q86X55	CARM1	Histone-arginine methyltransferase CARM1 (EC 2.1.1.319) (Coactivator-associated arginine methyltransferase 1) (Protein arginine N-methyltransferase 4)	0.919505	18	6.87e-08	0.853323	34	1.44e-10	0.0661815	-1.51652	Bottom10%
994321	4820-Q8N9Z2_CC71L,X7933.Q9Y6N5_SQOR	CCDC71L	Q8N9Z2	CC71L	Coiled-coil domain-containing protein 71L	SQOR	Q9Y6N5	SQOR	Sulfide:quinone oxidoreductase, mitochondrial (SQOR) (EC 1.8.5.8) (Sulfide dehydrogenase-like) (Sulfide quinone oxidoreductase)	0.936017	18	1.15e-08	0.871963	34	1.89e-11	0.0640532	-1.5265	Bottom10%
214745	772-O75947_ATP5H,X1520.P18859_ATP5J	ATP5PD	O75947	ATP5H	ATP synthase subunit d, mitochondrial (ATPase subunit d) (ATP synthase peripheral stalk subunit d)	ATP5PF	P18859	ATP5J	ATP synthase-coupling factor 6, mitochondrial (ATPase subunit F6) (ATP synthase peripheral stalk subunit F6)	0.940145	18	6.86e-09	0.876547	34	1.09e-11	0.0635975	-1.52863	Bottom10%
108746	382-O43181_NDUS4,X7931.Q9Y6M9_NDUB9	NDUFS4	O43181	NDUS4	NADH dehydrogenase [ubiquinone] iron-sulfur protein 4, mitochondrial (Complex I-18 kDa) (CI-18 kDa) (Complex I-AQDQ) (CI-AQDQ) (NADH-ubiquinone oxidoreductase 18 kDa subunit)	NDUFB9	Q9Y6M9	NDUB9	NADH dehydrogenase [ubiquinone] 1 beta subcomplex subunit 9 (Complex I-B22) (CI-B22) (LYR motif-containing protein 3) (NADH-ubiquinone oxidoreductase B22 subunit)	0.909185	18	1.74e-07	0.85149	34	1.74e-10	0.057695	-1.55629	Bottom10%
411060	1513-P18621_RL17,X2498.P61353_RL27	RPL17	P18621	RL17	60S ribosomal protein L17 (60S ribosomal protein L23) (Large ribosomal subunit protein uL22) (PD-1)	RPL27	P61353	RL27	60S ribosomal protein L27 (Large ribosomal subunit protein eL27)	0.909185	18	1.74e-07	0.85149	34	1.74e-10	0.057695	-1.55629	Bottom10%
241276	871-O95168_NDUB4,X896.O95298_NDUC2	NDUFB4	O95168	NDUB4	NADH dehydrogenase [ubiquinone] 1 beta subcomplex subunit 4 (Complex I-B15) (CI-B15) (NADH-ubiquinone oxidoreductase B15 subunit)	NDUFC2	O95298	NDUC2	NADH dehydrogenase [ubiquinone] 1 subunit C2 (Complex I-B14.5b) (CI-B14.5b) (Human lung cancer oncogene 1 protein) (HLC-1) (NADH-ubiquinone oxidoreductase subunit B14.5b)	0.929825	18	2.37e-08	0.87288	34	1.69e-11	0.0569445	-1.55981	Bottom10%
633887	2498-P61353_RL27,X2848.Q07020_RL18	RPL27	P61353	RL27	60S ribosomal protein L27 (Large ribosomal subunit protein eL27)	RPL18	Q07020	RL18	60S ribosomal protein L18 (Large ribosomal subunit protein eL18)	0.909185	18	1.74e-07	0.852406	34	1.58e-10	0.0567783	-1.56059	Bottom10%
303742	1103-P05187_PPB1,X1282.P10696_PPBN	ALPP	P05187	PPB1	Alkaline phosphatase, placental type (EC 3.1.3.1) (Alkaline phosphatase Regan isozyme) (Placental alkaline phosphatase 1) (PLAP-1)	ALPG	P10696	PPBN	Alkaline phosphatase, germ cell type (EC 3.1.3.1) (ALP-1) (Alkaline phosphatase Nagao isozyme) (Alkaline phosphatase, placental-like) (Germ cell alkaline phosphatase) (GCAP) (Placental alkaline phosphatase-like) (PLAP-like)	0.900929	18	3.41e-07	0.847823	34	2.49e-10	0.053106	-1.57779	Bottom10%
142211	504-O60218_AK1BA,X1386.P14555_PA2GA	AKR1B10	O60218	AK1BA	Aldo-keto reductase family 1 member B10 (EC 1.1.1.300) (EC 1.1.1.54) (ARL-1) (Aldose reductase-like) (Aldose reductase-related protein) (ARP) (hARP) (Small intestine reductase) (SI reductase)	PLA2G2A	P14555	PA2GA	Phospholipase A2, membrane associated (EC 3.1.1.4) (GIIC sPLA2) (Group IIA phospholipase A2) (Non-pancreatic secretory phospholipase A2) (NPS-PLA2) (Phosphatidylcholine 2-acylhydrolase 2A)	0.902993	18	2.9e-07	0.850879	34	1.85e-10	0.0521143	-1.58244	Bottom10%
698326	2796-Q03518_TAP1,X2797.Q03519_TAP2	TAP1	Q03518	TAP1	Antigen peptide transporter 1 (APT1) (EC 7.4.2.-) (ATP-binding cassette sub-family B member 2) (Peptide supply factor 1) (Peptide transporter PSF1) (PSF-1) (Peptide transporter TAP1) (Peptide transporter involved in antigen processing 1) (Really interesting new gene 4 protein) (RING4)	TAP2	Q03519	TAP2	Antigen peptide transporter 2 (APT2) (EC 7.4.2.-) (ATP-binding cassette sub-family B member 3) (Peptide supply factor 2) (Peptide transporter PSF2) (PSF-2) (Peptide transporter TAP2) (Peptide transporter involved in antigen processing 2) (Really interesting new gene 11 protein) (RING11)	0.913313	18	1.22e-07	0.861268	34	6.28e-11	0.0520446	-1.58277	Bottom10%
634721	2501-P61513_RL37A,X2545.P62312_LSM6	RPL37A	P61513	RL37A	60S ribosomal protein L37a (Large ribosomal subunit protein eL43)	LSM6	P62312	LSM6	U6 snRNA-associated Sm-like protein LSm6	0.902993	18	2.9e-07	0.855768	34	1.12e-10	0.047225	-1.60535	Bottom10%
632593	2494-P61254_RL26,X2498.P61353_RL27	RPL26	P61254	RL26	60S ribosomal protein L26 (Large ribosomal subunit protein uL24)	RPL27	P61353	RL27	60S ribosomal protein L27 (Large ribosomal subunit protein eL27)	0.917441	18	8.36e-08	0.878992	34	8.06e-12	0.0384491	-1.64648	Bottom10%
404891	1493-P17931_LEG3,X4835.Q8NB78_KDM1B	LGALS3	P17931	LEG3	Galectin-3 (Gal-3) (35 kDa lectin) (Carbohydrate-binding protein 35) (CBP 35) (Galactose-specific lectin 3) (Galactoside-binding protein) (GALBP) (IgE-binding protein) (L-31) (Laminin-binding protein) (Lectin L-29) (Mac-2 antigen)	KDM1B	Q8NB78	KDM1B	Lysine-specific histone demethylase 2 (EC 1.14.99.66) (Flavin-containing amine oxidase domain-containing protein 1) (Lysine-specific histone demethylase 1B)	0.909185	18	1.74e-07	0.870741	34	2.18e-11	0.0384437	-1.6465	Bottom10%
290502	1060-P03928_ATP8,X1520.P18859_ATP5J	MT-ATP8	P03928	ATP8	ATP synthase protein 8 (A6L) (F-ATPase subunit 8)	ATP5PF	P18859	ATP5J	ATP synthase-coupling factor 6, mitochondrial (ATPase subunit F6) (ATP synthase peripheral stalk subunit F6)	0.902993	18	2.9e-07	0.86738	34	3.2e-11	0.0356131	-1.65976	Bottom10%
35746	135-O00423_EMAL1,X2450.P58107_EPIPL	EML1	O00423	EMAL1	Echinoderm microtubule-associated protein-like 1 (EMAP-1) (HuEMAP-1)	EPPK1	P58107	EPIPL	Epiplakin (450 kDa epidermal antigen)	0.900929	18	3.41e-07	0.866463	34	3.55e-11	0.0344659	-1.66514	Bottom10%
648162	2559-P62750_RL23A,X2573.P62861_RS30	RPL23A	P62750	RL23A	60S ribosomal protein L23a (Large ribosomal subunit protein uL23)	FAU	P62861	RS30	FAU ubiquitin-like and ribosomal protein S30 [Cleaved into: Ubiquitin-like protein FUBI; 40S ribosomal protein S30 (Small ribosomal subunit protein eS30)]	0.927761	18	2.97e-08	0.895187	34	9.12e-13	0.0325734	-1.67401	Bottom10%
648159	2559-P62750_RL23A,X2565.P62829_RL23	RPL23A	P62750	RL23A	60S ribosomal protein L23a (Large ribosomal subunit protein uL23)	RPL23	P62829	RL23	60S ribosomal protein L23 (60S ribosomal protein L17) (Large ribosomal subunit protein uL14)	0.909185	18	1.74e-07	0.877464	34	9.74e-12	0.031721	-1.678	Bottom10%
590636	2284-P52272_HNRPM,X2729.Q01130_SRSF2	HNRNPM	P52272	HNRPM	Heterogeneous nuclear ribonucleoprotein M (hnRNP M)	SRSF2	Q01130	SRSF2	Serine/arginine-rich splicing factor 2 (Protein PR264) (Splicing component, 35 kDa) (Splicing factor SC35) (SC-35) (Splicing factor, arginine/serine-rich 2)	0.921569	18	5.62e-08	0.891826	34	1.47e-12	0.0297428	-1.68727	Bottom10%
411102	1513-P18621_RL17,X2606.P67809_YBOX1	RPL17	P18621	RL17	60S ribosomal protein L17 (60S ribosomal protein L23) (Large ribosomal subunit protein uL22) (PD-1)	YBX1	P67809	YBOX1	Y-box-binding protein 1 (YB-1) (CCAAT-binding transcription factor I subunit A) (CBF-A) (DNA-binding protein B) (DBPB) (Enhancer factor I subunit A) (EFI-A) (Nuclease-sensitive element-binding protein 1) (Y-box transcription factor)	0.909185	18	1.74e-07	0.882659	34	5.06e-12	0.0265262	-1.70235	Bottom10%
781796	3271-Q14764_MVP,X7434.Q9UKK3_PARP4	MVP	Q14764	MVP	Major vault protein (MVP) (Lung resistance-related protein)	PARP4	Q9UKK3	PARP4	Protein mono-ADP-ribosyltransferase PARP4 (EC 2.4.2.-) (193 kDa vault protein) (ADP-ribosyltransferase diphtheria toxin-like 4) (ARTD4) (PARP-related/IalphaI-related H5/proline-rich) (PH5P) (Poly [ADP-ribose] polymerase 4) (PARP-4) (Vault poly(ADP-ribose) polymerase) (VPARP)	0.907121	18	2.07e-07	0.881742	34	5.69e-12	0.0253789	-1.70772	Bottom10%
722377	2932-Q12834_CDC20,X3662.Q53HL2_BOREA	CDC20	Q12834	CDC20	Cell division cycle protein 20 homolog (p55CDC)	CDCA8	Q53HL2	BOREA	Borealin (Cell division cycle-associated protein 8) (Dasra-B) (hDasra-B) (Pluripotent embryonic stem cell-related gene 3 protein)	0.907121	18	2.07e-07	0.89152	34	1.54e-12	0.0156005	-1.75354	Bottom10%
108315	382-O43181_NDUS4,X1730.P28331_NDUS1	NDUFS4	O43181	NDUS4	NADH dehydrogenase [ubiquinone] iron-sulfur protein 4, mitochondrial (Complex I-18 kDa) (CI-18 kDa) (Complex I-AQDQ) (CI-AQDQ) (NADH-ubiquinone oxidoreductase 18 kDa subunit)	NDUFS1	P28331	NDUS1	NADH-ubiquinone oxidoreductase 75 kDa subunit, mitochondrial (EC 7.1.1.2) (Complex I-75kD) (CI-75kD)	0.915377	18	1.01e-07	0.901604	34	3.48e-13	0.0137724	-1.76211	Bottom10%
648166	2559-P62750_RL23A,X2578.P62899_RL31	RPL23A	P62750	RL23A	60S ribosomal protein L23a (Large ribosomal subunit protein uL23)	RPL31	P62899	RL31	60S ribosomal protein L31 (Large ribosomal subunit protein eL31)	0.919505	18	6.87e-08	0.9123	34	5.97e-14	0.0072051	-1.79288	Bottom10%
241272	871-O95168_NDUB4,X872.O95169_NDUB8	NDUFB4	O95168	NDUB4	NADH dehydrogenase [ubiquinone] 1 beta subcomplex subunit 4 (Complex I-B15) (CI-B15) (NADH-ubiquinone oxidoreductase B15 subunit)	NDUFB8	O95169	NDUB8	NADH dehydrogenase [ubiquinone] 1 beta subcomplex subunit 8, mitochondrial (Complex I-ASHI) (CI-ASHI) (NADH-ubiquinone oxidoreductase ASHI subunit)	0.905057	18	2.46e-07	0.898243	34	5.81e-13	0.00681387	-1.79472	Bottom10%
632614	2494-P61254_RL26,X2559.P62750_RL23A	RPL26	P61254	RL26	60S ribosomal protein L26 (Large ribosomal subunit protein uL24)	RPL23A	P62750	RL23A	60S ribosomal protein L23a (Large ribosomal subunit protein uL23)	0.931889	18	1.88e-08	0.930023	34	1.78e-15	0.0018656	-1.8179	Bottom10%
792178	3338-Q15119_PDK2,X3339.Q15120_PDK3	PDK2	Q15119	PDK2	[Pyruvate dehydrogenase (acetyl-transferring)] kinase isozyme 2, mitochondrial (EC 2.7.11.2) (Pyruvate dehydrogenase kinase isoform 2) (PDH kinase 2) (PDKII)	PDK3	Q15120	PDK3	[Pyruvate dehydrogenase (acetyl-transferring)] kinase isozyme 3, mitochondrial (EC 2.7.11.2) (Pyruvate dehydrogenase kinase isoform 3)	0.923633	18	4.57e-08	0.925134	34	5.33e-15	-0.0015011	-1.83368	Bottom10%
411081	1513-P18621_RL17,X2559.P62750_RL23A	RPL17	P18621	RL17	60S ribosomal protein L17 (60S ribosomal protein L23) (Large ribosomal subunit protein uL22) (PD-1)	RPL23A	P62750	RL23A	60S ribosomal protein L23a (Large ribosomal subunit protein uL23)	0.905057	18	2.46e-07	0.90741	34	1.37e-13	-0.00235344	-1.83767	Bottom10%
411132	1513-P18621_RL17,X2848.Q07020_RL18	RPL17	P18621	RL17	60S ribosomal protein L17 (60S ribosomal protein L23) (Large ribosomal subunit protein uL22) (PD-1)	RPL18	Q07020	RL18	60S ribosomal protein L18 (Large ribosomal subunit protein eL18)	0.905057	18	2.46e-07	0.91016	34	8.66e-14	-0.00510363	-1.85056	Bottom10%
932653	4304-Q7Z404_TMC4,X5942.Q99828_CIB1	TMC4	Q7Z404	TMC4	Transmembrane channel-like protein 4	CIB1	Q99828	CIB1	Calcium and integrin-binding protein 1 (CIB) (Calcium- and integrin-binding protein) (CIBP) (Calmyrin) (DNA-PKcs-interacting protein) (Kinase-interacting protein) (KIP) (SNK-interacting protein 2-28) (SIP2-28)	0.902993	18	2.9e-07	0.909855	34	9.1e-14	-0.0068621	-1.8588	Bottom10%
343574	1243-Q71UI9_H2AV,X2284.P52272_HNRPM	H2AZ2	Q71UI9	H2AV	Histone H2A.V (H2A.F/Z) (H2A.Z variant histone 2)	HNRNPM	P52272	HNRPM	Heterogeneous nuclear ribonucleoprotein M (hnRNP M)	0.907121	18	2.07e-07	0.91505	34	3.66e-14	-0.00792896	-1.8638	Bottom10%
4046	16-A1L170_CA226,X609.O75052_CAPON	C1orf226	A1L170	CA226	Uncharacterized protein C1orf226	NOS1AP	O75052	CAPON	Carboxyl-terminal PDZ ligand of neuronal nitric oxide synthase protein (C-terminal PDZ ligand of neuronal nitric oxide synthase protein) (Nitric oxide synthase 1 adaptor protein)	0.925697	18	3.69e-08	0.935523	34	4.44e-16	-0.00982671	-1.87269	Bottom10%
315090	1141-P07148_FABPL,X6798.Q9NQV6_PRD10	FABP1	P07148	FABPL	Fatty acid-binding protein, liver (Fatty acid-binding protein 1) (Liver-type fatty acid-binding protein) (L-FABP)	PRDM10	Q9NQV6	PRD10	PR domain zinc finger protein 10 (EC 2.1.1.-) (PR domain-containing protein 10) (Tristanin)	0.900929	18	3.41e-07	0.911383	34	7.02e-14	-0.0104539	-1.87563	Bottom10%
241624	872-O95169_NDUB8,X896.O95298_NDUC2	NDUFB8	O95169	NDUB8	NADH dehydrogenase [ubiquinone] 1 beta subcomplex subunit 8, mitochondrial (Complex I-ASHI) (CI-ASHI) (NADH-ubiquinone oxidoreductase ASHI subunit)	NDUFC2	O95298	NDUC2	NADH dehydrogenase [ubiquinone] 1 subunit C2 (Complex I-B14.5b) (CI-B14.5b) (Human lung cancer oncogene 1 protein) (HLC-1) (NADH-ubiquinone oxidoreductase subunit B14.5b)	0.911249	18	1.46e-07	0.924828	34	5.55e-15	-0.0135794	-1.89028	Bottom10%
411058	1513-P18621_RL17,X2494.P61254_RL26	RPL17	P18621	RL17	60S ribosomal protein L17 (60S ribosomal protein L23) (Large ribosomal subunit protein uL22) (PD-1)	RPL26	P61254	RL26	60S ribosomal protein L26 (Large ribosomal subunit protein uL24)	0.913313	18	1.22e-07	0.933079	34	8.88e-16	-0.019766	-1.91927	Bottom10%

## Sheet: Table S3B
Table S3B: Correlation coefficients of the top and bottom 10% protein‒protein pairs
			KRAS mut cells	KRAS mut cells	KRAS mut cells	34 CRC cells	34 CRC cells	34 CRC cells
Node1 (, ;interact with) Node2	Node1_Gene	Node2_Gene	Rho①	number of valid value	p-value	Rho②	number of valid value	p-value	Top10%/ Bottom10%	Annotation(C; CRC35, F;STRING Functional, P;STRING Physical )	cocor comparing correlations (Two-tailed ) http://comparingcorrelations.org
103-O00212_RHOD,X1405.P15153_RAC2	RHOD	RAC2	0.314286	6	0.544093	0.216783	12	0.498556	Top10%	F
103-O00212_RHOD,X2339.P53667_LIMK1	RHOD	LIMK1	0.3	9	0.432845	-0.0315789	19	0.897883	Top10%	F
103-O00212_RHOD,X4918.Q8NEZ3_WDR19	RHOD	WDR19	0.928571	7	0.00251947	0.00714286	15	0.979844	Top10%	C	z = 2.8419, p-value = 0.0045
103-O00212_RHOD,X620.O75116_ROCK2	RHOD	ROCK2	-0.27972	12	0.378569	0.176877	23	0.419456	Top10%	F
1041-P02462_CO4A1,X2694.P98095_FBLN2	COL4A1	FBLN2	0.4	4	0.6	0.0952381	8	0.822505	Top10%	F
1041-P02462_CO4A1,X6716.Q9HD23_MRS2	COL4A1	MRS2	0.904762	8	0.00200828	-0.243956	14	0.400625	Top10%	C	z = 3.2387, p-value = 0.0012
1051-P02753_RET4,X4434.Q86VV8_RTTN	RBP4	RTTN	0.90303	10	0.000343612	0.141728	22	0.529252	Top10%	C	z = 3.0436, p-value = 0.0023
1080-P04439_HLAA,X5185.Q8WXI7_MUC16	HLA-A	MUC16	-0.245455	11	0.466922	-0.0857143	20	0.719366	Top10%	F
1080-P04439_HLAA,X7343.Q9UHV7_MED13	HLA-A	MED13	0.967033	13	7.06e-08	0.236239	26	0.245283	Top10%	C	z = 4.7615, p-value = 0.0000
1134-P06748_NPM,X1412.P15313_VATB1	NPM1	ATP6V1B1	0.902098	12	6e-05	0.122051	26	0.552538	Top10%	C	z = 3.4608, p-value = 0.0005
1134-P06748_NPM,X1547.P20042_IF2B	NPM1	EIF2S2	0.157895	18	0.531483	0.292895	34	0.092749	Top10%	F
1134-P06748_NPM,X4931.Q8NFH3_NUP43	NPM1	NUP43	0.141383	18	0.575754	0.28495	34	0.102375	Top10%	F+P
1134-P06748_NPM,X620.O75116_ROCK2	NPM1	ROCK2	0.0113519	18	0.964342	0.0600458	34	0.735866	Top10%	F+P
1178-P08138_TNR16,X2918.Q11201_SIA4A	NGFR	ST3GAL1	0.928571	8	0.000862968	0.230075	20	0.329138	Top10%	C	z = 2.7787, p-value = 0.0055
1282-P10696_PPBN,X1103.P05187_PPB1	ALPG	ALPP	0.900929	18	3.41e-07	0.847823	34	2.49e-10	Bottom10%	C
1386-P14555_PA2GA,X504.O60218_AK1BA	PLA2G2A	AKR1B10	0.902993	18	2.9e-07	0.850879	34	1.85e-10	Bottom10%	C
1390-P14635_CCNB1,X2932.Q12834_CDC20	CCNB1	CDC20	0.839009	18	1.35e-05	0.787319	34	3.32e-08	Bottom10%	F+P
1405-P15153_RAC2,X2339.P53667_LIMK1	RAC2	LIMK1	0.372727	11	0.258926	0.131564	22	0.559479	Top10%	F
1405-P15153_RAC2,X6003.Q9BR39_JPH2	RAC2	JPH2	1	4	0	0.236364	11	0.484091	Top10%	C	z = Inf, p-value = 0.0000
1405-P15153_RAC2,X620.O75116_ROCK2	RAC2	ROCK2	-0.034965	12	0.914093	-0.0256917	23	0.907367	Top10%	F
1504-P18124_RL7,X2501.P61513_RL37A	RPL7	RPL37A	0.880289	18	1.45e-06	0.803514	34	1.06e-08	Bottom10%	F+P
1504-P18124_RL7,X5013.Q8TCC3_RM30	RPL7	MRPL30	-0.00103199	18	0.996757	0.0132926	34	0.940523	Bottom10%	F
1513-P18621_RL17,X1504.P18124_RL7	RPL17	RPL7	0.80805	18	4.97e-05	0.709091	34	2.68e-06	Bottom10%	F+P
1513-P18621_RL17,X2494.P61254_RL26	RPL17	RPL26	0.913313	18	1.22e-07	0.933079	34	8.88e-16	Bottom10%	C+F+P
1513-P18621_RL17,X2498.P61353_RL27	RPL17	RPL27	0.909185	18	1.74e-07	0.85149	34	1.74e-10	Bottom10%	C+F+P
1513-P18621_RL17,X2501.P61513_RL37A	RPL17	RPL37A	0.723426	18	0.000690902	0.706646	34	3e-06	Bottom10%	F+P
1513-P18621_RL17,X2513.P61927_RL37	RPL17	RPL37	0.793602	18	8.47e-05	0.80107	34	1.27e-08	Bottom10%	F+P
1513-P18621_RL17,X2559.P62750_RL23A	RPL17	RPL23A	0.905057	18	2.46e-07	0.90741	34	1.37e-13	Bottom10%	C+F+P
1513-P18621_RL17,X2565.P62829_RL23	RPL17	RPL23	0.826625	18	2.35e-05	0.799236	34	1.45e-08	Bottom10%	F+P
1513-P18621_RL17,X2570.P62851_RS25	RPL17	RPS25	0.822497	18	2.79e-05	0.821238	34	2.68e-09	Bottom10%	F+P
1513-P18621_RL17,X2573.P62861_RS30	RPL17	FAU	0.836945	18	1.49e-05	0.816654	34	3.88e-09	Bottom10%	F+P
1513-P18621_RL17,X2578.P62899_RL31	RPL17	RPL31	0.79773	18	7.3e-05	0.815432	34	4.27e-09	Bottom10%	F+P
1513-P18621_RL17,X2606.P67809_YBOX1	RPL17	YBX1	0.909185	18	1.74e-07	0.882659	34	5.06e-12	Bottom10%	C+F
1513-P18621_RL17,X2848.Q07020_RL18	RPL17	RPL18	0.905057	18	2.46e-07	0.91016	34	8.66e-14	Bottom10%	C+F+P
1513-P18621_RL17,X554.O60524_NEMF	RPL17	NEMF	0.911249	18	1.46e-07	0.813293	34	5.05e-09	Bottom10%	C+F+P
1513-P18621_RL17,X7594.Q9UQ80_PA2G4	RPL17	PA2G4	0.649123	18	0.00355837	0.578304	34	0.0003406	Bottom10%	F+P
1520-P18859_ATP5J,X1060.P03928_ATP8	ATP5PF	MT-ATP8	0.902993	18	2.9e-07	0.86738	34	3.2e-11	Bottom10%	C
1520-P18859_ATP5J,X772.O75947_ATP5H	ATP5PF	ATP5PD	0.940144	18	6.86e-09	0.876547	34	1.09e-11	Bottom10%	C
1730-P28331_NDUS1,X382.O43181_NDUS4	NDUFS1	NDUFS4	0.915377	18	1.01e-07	0.901604	34	3.48e-13	Bottom10%	C+F+P
1730-P28331_NDUS1,X871.O95168_NDUB4	NDUFS1	NDUFB4	0.599587	18	0.0085367	0.609167	34	0.000131569	Bottom10%	F+P
1730-P28331_NDUS1,X872.O95169_NDUB8	NDUFS1	NDUFB8	0.680083	18	0.0018996	0.759817	34	1.87e-07	Bottom10%	F+P
1777-P30050_RL12,X1504.P18124_RL7	RPL12	RPL7	0.913313	18	1.22e-07	0.814515	34	4.59e-09	Bottom10%	C+F+P
1777-P30050_RL12,X1513.P18621_RL17	RPL12	RPL17	0.739938	18	0.000447266	0.782735	34	4.51e-08	Bottom10%	F+P
1777-P30050_RL12,X2284.P52272_HNRPM	RPL12	HNRNPM	0.737874	18	0.000473057	0.790069	34	2.75e-08	Bottom10%	F
1777-P30050_RL12,X2494.P61254_RL26	RPL12	RPL26	0.638803	18	0.00432212	0.773568	34	8.13e-08	Bottom10%	F+P
1777-P30050_RL12,X2498.P61353_RL27	RPL12	RPL27	0.795666	18	7.87e-05	0.795264	34	1.92e-08	Bottom10%	F+P
1777-P30050_RL12,X2501.P61513_RL37A	RPL12	RPL37A	0.847265	18	9.11e-06	0.801375	34	1.24e-08	Bottom10%	F+P
1777-P30050_RL12,X2513.P61927_RL37	RPL12	RPL37	0.531476	18	0.0232163	0.632697	34	5.95e-05	Bottom10%	F+P
1777-P30050_RL12,X2559.P62750_RL23A	RPL12	RPL23A	0.655315	18	0.00315585	0.799236	34	1.45e-08	Bottom10%	F+P
1777-P30050_RL12,X2565.P62829_RL23	RPL12	RPL23	0.657379	18	0.00303029	0.716119	34	1.92e-06	Bottom10%	F+P
1777-P30050_RL12,X2570.P62851_RS25	RPL12	RPS25	0.570691	18	0.0133843	0.625974	34	7.51e-05	Bottom10%	F+P
1777-P30050_RL12,X2573.P62861_RS30	RPL12	FAU	0.688338	18	0.0015871	0.728037	34	1.06e-06	Bottom10%	F+P
1777-P30050_RL12,X2578.P62899_RL31	RPL12	RPL31	0.640867	18	0.00415955	0.73262	34	8.39e-07	Bottom10%	F+P
1777-P30050_RL12,X2606.P67809_YBOX1	RPL12	YBX1	0.638803	18	0.00432212	0.753705	34	2.67e-07	Bottom10%	F
1777-P30050_RL12,X2848.Q07020_RL18	RPL12	RPL18	0.75645	18	0.000280219	0.808709	34	7.19e-09	Bottom10%	F+P
1777-P30050_RL12,X554.O60524_NEMF	RPL12	NEMF	0.669763	18	0.00236009	0.699618	34	4.14e-06	Bottom10%	F+P
1777-P30050_RL12,X7594.Q9UQ80_PA2G4	RPL12	PA2G4	0.859649	18	4.83e-06	0.707563	34	2.88e-06	Bottom10%	F+P
1845-P32926_DSG3,X7423.Q9UKA9_PTBP2	DSG3	PTBP2	0.918182	11	6.66e-05	0.221053	20	0.348974	Top10%	C	z = 3.1547, p-value = 0.0016
2051-P46013_KI67,X1134.P06748_NPM	MKI67	NPM1	-0.00928793	18	0.970822	0.187471	34	0.288373	Top10%	F
2051-P46013_KI67,X4051.Q6P6B1_ERIC5	MKI67	ERICH5	0.936364	11	2.21e-05	0.06917	23	0.753822	Top10%	C	z = 3.9165, p-value = 0.0001
2051-P46013_KI67,X6407.Q9H211_CDT1	MKI67	CDT1	-0.356643	12	0.255138	0.0317949	26	0.877462	Top10%	F
2156-P49638_TTPA,X1542.P19835_CEL	TTPA	CEL	0.90303	10	0.000343612	0.179221	21	0.436965	Top10%	C	z = 2.9347, p-value = 0.0033
2156-P49638_TTPA,X2855.Q07654_TFF3	TTPA	TFF3	1	4	0	0.166667	8	0.693239	Top10%	C	z = Inf, p-value = 0.0000
2156-P49638_TTPA,X2968.Q12982_BNIP2	TTPA	BNIP2	-0.369697	10	0.29305	-0.476623	21	0.0289283	Top10%	F
2156-P49638_TTPA,X436.O43566_RGS14	TTPA	RGS14	1	5	0	0.188811	12	0.556737	Top10%	C	z = Inf, p-value = 0.0000
2284-P52272_HNRPM,X1243.Q71UI9_H2AV	HNRNPM	H2AZ2	0.907121	18	2.07e-07	0.91505	34	3.66e-14	Bottom10%	C
2284-P52272_HNRPM,X2570.P62851_RS25	HNRNPM	RPS25	0.814241	18	3.91e-05	0.819404	34	3.11e-09	Bottom10%	F
2339-P53667_LIMK1,X5552.Q96F46_I17RA	LIMK1	IL17RA	0.933333	9	0.0002359	0.196992	20	0.405152	Top10%	C	z = 3.1252, p-value = 0.0018
2339-P53667_LIMK1,X620.O75116_ROCK2	LIMK1	ROCK2	0.367857	15	0.177342	0.171524	30	0.364778	Top10%	F
2441-P57105_SYJ2B,X2694.P98095_FBLN2	SYNJ2BP	FBLN2	0.915152	10	0.000204472	0.233766	21	0.307788	Top10%	C	z = 2.9638, p-value = 0.0030
2450-P58107_EPIPL,X135.O00423_EMAL1	EPPK1	EML1	0.900929	18	3.41e-07	0.866463	34	3.55e-11	Bottom10%	C
2450-P58107_EPIPL,X213.O14686_KMT2D	EPPK1	KMT2D	-0.27967	18	0.261026	-0.0780749	34	0.660739	Bottom10%	F
2494-P61254_RL26,X1504.P18124_RL7	RPL26	RPL7	0.719298	18	0.000766664	0.69259	34	5.66e-06	Bottom10%	F+P
2494-P61254_RL26,X2501.P61513_RL37A	RPL26	RPL37A	0.723426	18	0.000690902	0.735982	34	7.04e-07	Bottom10%	F+P
2494-P61254_RL26,X2513.P61927_RL37	RPL26	RPL37	0.890609	18	7.28e-07	0.845684	34	3.07e-10	Bottom10%	F+P
2494-P61254_RL26,X2570.P62851_RS25	RPL26	RPS25	0.886481	18	9.66e-07	0.897937	34	6.08e-13	Bottom10%	F+P
2494-P61254_RL26,X382.O43181_NDUS4	RPL26	NDUFS4	0.473684	18	0.0470641	0.4466	34	0.00810379	Bottom10%	F
2494-P61254_RL26,X554.O60524_NEMF	RPL26	NEMF	0.760578	18	0.000247907	0.778762	34	5.84e-08	Bottom10%	F+P
2498-P61353_RL27,X1504.P18124_RL7	RPL27	RPL7	0.851393	18	7.42e-06	0.739343	34	5.89e-07	Bottom10%	F+P
2498-P61353_RL27,X2284.P52272_HNRPM	RPL27	HNRNPM	0.874097	18	2.12e-06	0.827044	34	1.65e-09	Bottom10%	F
2498-P61353_RL27,X2494.P61254_RL26	RPL27	RPL26	0.917441	18	8.36e-08	0.878992	34	8.06e-12	Bottom10%	C+F+P
2498-P61353_RL27,X2501.P61513_RL37A	RPL27	RPL37A	0.803922	18	5.82e-05	0.795569	34	1.88e-08	Bottom10%	F+P
2498-P61353_RL27,X2513.P61927_RL37	RPL27	RPL37	0.78741	18	0.00010501	0.723147	34	1.36e-06	Bottom10%	F+P
2498-P61353_RL27,X2559.P62750_RL23A	RPL27	RPL23A	0.847265	18	9.11e-06	0.852712	34	1.53e-10	Bottom10%	F+P
2498-P61353_RL27,X2565.P62829_RL23	RPL27	RPL23	0.876161	18	1.87e-06	0.900688	34	4.01e-13	Bottom10%	F+P
2498-P61353_RL27,X2570.P62851_RS25	RPL27	RPS25	0.824561	18	2.56e-05	0.817265	34	3.69e-09	Bottom10%	F+P
2498-P61353_RL27,X2573.P62861_RS30	RPL27	FAU	0.75645	18	0.000280219	0.811154	34	5.96e-09	Bottom10%	F+P
2498-P61353_RL27,X2578.P62899_RL31	RPL27	RPL31	0.76677	18	0.000205354	0.80657	34	8.45e-09	Bottom10%	F+P
2498-P61353_RL27,X2848.Q07020_RL18	RPL27	RPL18	0.909185	18	1.74e-07	0.852406	34	1.58e-10	Bottom10%	C+F+P
2498-P61353_RL27,X554.O60524_NEMF	RPL27	NEMF	0.793602	18	8.47e-05	0.728648	34	1.03e-06	Bottom10%	F+P
2513-P61927_RL37,X1504.P18124_RL7	RPL37	RPL7	0.54386	18	0.0196436	0.6767	34	1.11e-05	Bottom10%	F+P
2513-P61927_RL37,X2501.P61513_RL37A	RPL37	RPL37A	0.525284	18	0.0251836	0.583804	34	0.000289501	Bottom10%	F+P
2513-P61927_RL37,X554.O60524_NEMF	RPL37	NEMF	0.655315	18	0.00315585	0.69259	34	5.66e-06	Bottom10%	F+P
2545-P62312_LSM6,X2501.P61513_RL37A	LSM6	RPL37A	0.902993	18	2.9e-07	0.855768	34	1.12e-10	Bottom10%	C
2545-P62312_LSM6,X2513.P61927_RL37	LSM6	RPL37	0.529412	18	0.0238582	0.604889	34	0.000150995	Bottom10%	F
2559-P62750_RL23A,X1504.P18124_RL7	RPL23A	RPL7	0.737874	18	0.000473057	0.73751	34	6.5e-07	Bottom10%	F+P
2559-P62750_RL23A,X2284.P52272_HNRPM	RPL23A	HNRNPM	0.793602	18	8.47e-05	0.831016	34	1.17e-09	Bottom10%	F
2559-P62750_RL23A,X2494.P61254_RL26	RPL23A	RPL26	0.931889	18	1.88e-08	0.930023	34	1.78e-15	Bottom10%	C+F+P
2559-P62750_RL23A,X2501.P61513_RL37A	RPL23A	RPL37A	0.760578	18	0.000247907	0.757983	34	2.08e-07	Bottom10%	F+P
2559-P62750_RL23A,X2513.P61927_RL37	RPL23A	RPL37	0.814241	18	3.91e-05	0.821238	34	2.68e-09	Bottom10%	F+P
2559-P62750_RL23A,X2570.P62851_RS25	RPL23A	RPS25	0.839009	18	1.35e-05	0.802597	34	1.13e-08	Bottom10%	F+P
2559-P62750_RL23A,X554.O60524_NEMF	RPL23A	NEMF	0.826625	18	2.35e-05	0.792819	34	2.28e-08	Bottom10%	F+P
2565-P62829_RL23,X1504.P18124_RL7	RPL23	RPL7	0.688338	18	0.0015871	0.625363	34	7.67e-05	Bottom10%	F+P
2565-P62829_RL23,X2494.P61254_RL26	RPL23	RPL26	0.876161	18	1.87e-06	0.845989	34	2.98e-10	Bottom10%	F+P
2565-P62829_RL23,X2501.P61513_RL37A	RPL23	RPL37A	0.72549	18	0.000655434	0.747594	34	3.76e-07	Bottom10%	F+P
2565-P62829_RL23,X2513.P61927_RL37	RPL23	RPL37	0.785346	18	0.000112654	0.709091	34	2.68e-06	Bottom10%	F+P
2565-P62829_RL23,X2559.P62750_RL23A	RPL23	RPL23A	0.909185	18	1.74e-07	0.877464	34	9.74e-12	Bottom10%	C+F+P
2565-P62829_RL23,X2570.P62851_RS25	RPL23	RPS25	0.845201	18	1.01e-05	0.811765	34	5.69e-09	Bottom10%	F+P
2565-P62829_RL23,X2578.P62899_RL31	RPL23	RPL31	0.859649	18	4.83e-06	0.836516	34	7.21e-10	Bottom10%	F+P
2565-P62829_RL23,X2606.P67809_YBOX1	RPL23	YBX1	0.812178	18	4.24e-05	0.775095	34	7.38e-08	Bottom10%	F
2565-P62829_RL23,X554.O60524_NEMF	RPL23	NEMF	0.77709	18	0.000148126	0.679756	34	9.8e-06	Bottom10%	F+P
2570-P62851_RS25,X1504.P18124_RL7	RPS25	RPL7	0.609907	18	0.00719666	0.564248	34	0.000509432	Bottom10%	F+P
2570-P62851_RS25,X2501.P61513_RL37A	RPS25	RPL37A	0.593395	18	0.00943262	0.65042	34	3.13e-05	Bottom10%	F+P
2570-P62851_RS25,X2513.P61927_RL37	RPS25	RPL37	0.956656	18	5.47e-10	0.799236	34	1.45e-08	Bottom10%	F+P
2573-P62861_RS30,X1504.P18124_RL7	FAU	RPL7	0.69453	18	0.00138177	0.717953	34	1.75e-06	Bottom10%	F+P
2573-P62861_RS30,X2494.P61254_RL26	FAU	RPL26	0.830753	18	1.96e-05	0.830405	34	1.24e-09	Bottom10%	F+P
2573-P62861_RS30,X2501.P61513_RL37A	FAU	RPL37A	0.824561	18	2.56e-05	0.781818	34	4.79e-08	Bottom10%	F+P
2573-P62861_RS30,X2513.P61927_RL37	FAU	RPL37	0.702786	18	0.00114272	0.723453	34	1.34e-06	Bottom10%	F+P
2573-P62861_RS30,X2559.P62750_RL23A	FAU	RPL23A	0.927761	18	2.97e-08	0.895187	34	9.12e-13	Bottom10%	C+F+P
2573-P62861_RS30,X2565.P62829_RL23	FAU	RPL23	0.830753	18	1.96e-05	0.808709	34	7.19e-09	Bottom10%	F+P
2573-P62861_RS30,X2570.P62851_RS25	FAU	RPS25	0.74613	18	0.000376859	0.740565	34	5.52e-07	Bottom10%	F+P
2573-P62861_RS30,X2578.P62899_RL31	FAU	RPL31	0.867905	18	3.05e-06	0.856684	34	1.02e-10	Bottom10%	F+P
2578-P62899_RL31,X1504.P18124_RL7	RPL31	RPL7	0.719298	18	0.000766664	0.789152	34	2.93e-08	Bottom10%	F+P
2578-P62899_RL31,X2284.P52272_HNRPM	RPL31	HNRNPM	0.762642	18	0.000232967	0.83071	34	1.2e-09	Bottom10%	F
2578-P62899_RL31,X2494.P61254_RL26	RPL31	RPL26	0.818369	18	3.31e-05	0.860657	34	6.71e-11	Bottom10%	F+P
2578-P62899_RL31,X2501.P61513_RL37A	RPL31	RPL37A	0.73581	18	0.000500083	0.801681	34	1.21e-08	Bottom10%	F+P
2578-P62899_RL31,X2513.P61927_RL37	RPL31	RPL37	0.752322	18	0.000316009	0.790985	34	2.59e-08	Bottom10%	F+P
2578-P62899_RL31,X2559.P62750_RL23A	RPL31	RPL23A	0.919505	18	6.87e-08	0.912299	34	5.97e-14	Bottom10%	C+F+P
2578-P62899_RL31,X2570.P62851_RS25	RPL31	RPS25	0.834881	18	1.63e-05	0.791597	34	2.48e-08	Bottom10%	F+P
2578-P62899_RL31,X554.O60524_NEMF	RPL31	NEMF	0.785346	18	0.000112654	0.78304	34	4.42e-08	Bottom10%	F+P
258-O14974_MYPT1,X1405.P15153_RAC2	PPP1R12A	RAC2	0.048951	12	0.879919	0.22332	23	0.305699	Top10%	F
258-O14974_MYPT1,X2339.P53667_LIMK1	PPP1R12A	LIMK1	-0.328571	15	0.23181	-0.0874305	30	0.64594	Top10%	F
258-O14974_MYPT1,X2694.P98095_FBLN2	PPP1R12A	FBLN2	0.915152	10	0.000204472	0.138961	21	0.548018	Top10%	C	z = 3.1845, p-value = 0.0015
258-O14974_MYPT1,X2963.Q12972_PP1R8	PPP1R12A	PPP1R8	0.246646	18	0.323809	0.216807	34	0.218092	Top10%	F
258-O14974_MYPT1,X620.O75116_ROCK2	PPP1R12A	ROCK2	-0.0237358	18	0.925518	0.000763942	34	0.996579	Top10%	F+P
2606-P67809_YBOX1,X1504.P18124_RL7	YBX1	RPL7	0.727554	18	0.000621502	0.756455	34	2.28e-07	Bottom10%	F
2606-P67809_YBOX1,X2284.P52272_HNRPM	YBX1	HNRNPM	0.70485	18	0.00108867	0.812376	34	5.43e-09	Bottom10%	F
2606-P67809_YBOX1,X2494.P61254_RL26	YBX1	RPL26	0.836945	18	1.49e-05	0.851184	34	1.79e-10	Bottom10%	F
2606-P67809_YBOX1,X2501.P61513_RL37A	YBX1	RPL37A	0.675955	18	0.00207395	0.693812	34	5.36e-06	Bottom10%	F
2606-P67809_YBOX1,X2559.P62750_RL23A	YBX1	RPL23A	0.839009	18	1.35e-05	0.85699	34	9.89e-11	Bottom10%	F
2606-P67809_YBOX1,X2570.P62851_RS25	YBX1	RPS25	0.79773	18	7.3e-05	0.789763	34	2.81e-08	Bottom10%	F
2645-P78549_NTH,X5365.Q969Q5_RAB24	NTHL1	RAB24	0.904762	8	0.00200828	0.116615	18	0.644932	Top10%	C	z = 2.6737, p-value = 0.0075
2645-P78549_NTH,X5727.Q96MM7_H6ST2	NTHL1	HS6ST2	1	5	0	-0.13986	12	0.664633	Top10%	C	z = Inf, p-value = 0.0000
2645-P78549_NTH,X6183.Q9BWW4_SSBP3	NTHL1	SSBP3	0.942857	6	0.00480466	0.161765	16	0.549483	Top10%	C	z = 2.4980, p-value = 0.0125
2645-P78549_NTH,X7576.Q9UPT6_JIP3	NTHL1	MAPK8IP3	1	4	0	0.318182	11	0.340298	Top10%	C	z = Inf, p-value = 0.0000
2685-P84103_SRSF3,X2284.P52272_HNRPM	SRSF3	HNRNPM	0.71517	18	0.00084924	0.795569	34	1.88e-08	Bottom10%	F
2685-P84103_SRSF3,X2494.P61254_RL26	SRSF3	RPL26	0.828689	18	2.15e-05	0.820015	34	2.96e-09	Bottom10%	F
2685-P84103_SRSF3,X2559.P62750_RL23A	SRSF3	RPL23A	0.907121	18	2.07e-07	0.827349	34	1.61e-09	Bottom10%	C
2685-P84103_SRSF3,X2606.P67809_YBOX1	SRSF3	YBX1	0.80805	18	4.97e-05	0.826432	34	1.74e-09	Bottom10%	F
2685-P84103_SRSF3,X2729.Q01130_SRSF2	SRSF3	SRSF2	0.583075	18	0.0110924	0.702063	34	3.71e-06	Bottom10%	F+P
2729-Q01130_SRSF2,X2284.P52272_HNRPM	SRSF2	HNRNPM	0.921569	18	5.62e-08	0.891826	34	1.47e-12	Bottom10%	C+F
2729-Q01130_SRSF2,X2606.P67809_YBOX1	SRSF2	YBX1	0.609907	18	0.00719666	0.740565	34	5.52e-07	Bottom10%	F+P
2737-Q01484_ANK2,X4272.Q7L945_ZN627	ANK2	ZNF627	0.9	11	0.000159971	0.048419	23	0.826348	Top10%	C	z = 3.4034, p-value = 0.0007
2737-Q01484_ANK2,X6003.Q9BR39_JPH2	ANK2	JPH2	0.714286	8	0.0465282	0.364912	19	0.124497	Top10%	F
276-O15054_KDM6B,X5092.Q8WU10_PYRD1	KDM6B	PYROXD1	1	4	0	-0.0238095	8	0.955374	Top10%	C	z = Inf, p-value = 0.0000
2791-Q03252_LMNB2,X1390.P14635_CCNB1	LMNB2	CCNB1	-0.49226	18	0.037965	-0.316425	34	0.0682714	Bottom10%	F
2791-Q03252_LMNB2,X2513.P61927_RL37	LMNB2	RPL37	0.917441	18	8.36e-08	0.817265	34	3.69e-09	Bottom10%	C
2791-Q03252_LMNB2,X2570.P62851_RS25	LMNB2	RPS25	0.925697	18	3.69e-08	0.815126	34	4.38e-09	Bottom10%	C
2791-Q03252_LMNB2,X2932.Q12834_CDC20	LMNB2	CDC20	-0.366357	18	0.134837	-0.0664629	34	0.708806	Bottom10%	F
2791-Q03252_LMNB2,X3662.Q53HL2_BOREA	LMNB2	CDCA8	-0.327141	18	0.185133	-0.0679908	34	0.702413	Bottom10%	F
2797-Q03519_TAP2,X2796.Q03518_TAP1	TAP2	TAP1	0.913313	18	1.22e-07	0.861268	34	6.28e-11	Bottom10%	C+F+P
2848-Q07020_RL18,X1504.P18124_RL7	RPL18	RPL7	0.801858	18	6.28e-05	0.797403	34	1.65e-08	Bottom10%	F+P
2848-Q07020_RL18,X2494.P61254_RL26	RPL18	RPL26	0.824561	18	2.56e-05	0.876547	34	1.09e-11	Bottom10%	F+P
2848-Q07020_RL18,X2501.P61513_RL37A	RPL18	RPL37A	0.764706	18	0.000218793	0.756761	34	2.24e-07	Bottom10%	F+P
2848-Q07020_RL18,X2513.P61927_RL37	RPL18	RPL37	0.73581	18	0.000500083	0.843239	34	3.87e-10	Bottom10%	F+P
2848-Q07020_RL18,X2559.P62750_RL23A	RPL18	RPL23A	0.76677	18	0.000205354	0.854545	34	1.27e-10	Bottom10%	F+P
2848-Q07020_RL18,X2565.P62829_RL23	RPL18	RPL23	0.729618	18	0.000589052	0.761345	34	1.71e-07	Bottom10%	F+P
2848-Q07020_RL18,X2570.P62851_RS25	RPL18	RPS25	0.781218	18	0.000129364	0.797097	34	1.69e-08	Bottom10%	F+P
2848-Q07020_RL18,X2573.P62861_RS30	RPL18	FAU	0.71517	18	0.00084924	0.757678	34	2.12e-07	Bottom10%	F+P
2848-Q07020_RL18,X2578.P62899_RL31	RPL18	RPL31	0.702786	18	0.00114272	0.798014	34	1.58e-08	Bottom10%	F+P
2848-Q07020_RL18,X554.O60524_NEMF	RPL18	NEMF	0.779154	18	0.000138476	0.794041	34	2.09e-08	Bottom10%	F+P
2921-Q12767_TMM94,X7142.Q9P0M2_AKA7G	TMEM94	AKAP7	0.939394	10	5.48e-05	0.184641	22	0.410735	Top10%	C	z = 3.4968, p-value = 0.0005
2939-Q12864_CAD17,X1493.P17931_LEG3	CDH17	LGALS3	0.721362	18	0.00072796	0.66906	34	1.52e-05	Bottom10%	F+P
2939-Q12864_CAD17,X2090.P47902_CDX1	CDH17	CDX1	0.913313	18	1.22e-07	0.802292	34	1.16e-08	Bottom10%	C
2963-Q12972_PP1R8,X4931.Q8NFH3_NUP43	PPP1R8	NUP43	0.915377	18	1.01e-07	0.180749	34	0.306321	Top10%	C	z = 4.3780, p-value = 0.0000
2968-Q12982_BNIP2,X7645.Q9Y2D9_ZN652	BNIP2	ZNF652	0.909091	12	4.19e-05	0.210474	23	0.335063	Top10%	C	z = 2.9676, p-value = 0.0030
3131-Q13753_LAMC2,X3130.Q13751_LAMB3	LAMC2	LAMB3	0.960784	18	2.49e-10	0.856684	34	1.02e-10	Bottom10%	C+F+P
3213-Q14314_FGL2,X3473.Q16533_SNPC1	FGL2	SNAPC1	0.927273	10	0.000112035	0.230943	22	0.301112	Top10%	C	z = 3.1741, p-value = 0.0015
3257-Q14686_NCOA6,X1141.P07148_FABPL	NCOA6	FABP1	0.205366	18	0.413635	0.224752	34	0.201277	Bottom10%	F
3257-Q14686_NCOA6,X213.O14686_KMT2D	NCOA6	KMT2D	0.905057	18	2.46e-07	0.823682	34	2.19e-09	Bottom10%	C+F+P
3257-Q14686_NCOA6,X4459.Q86X55_CARM1	NCOA6	CARM1	0.294118	18	0.236143	0.0673797	34	0.704968	Bottom10%	F
3257-Q14686_NCOA6,X6798.Q9NQV6_PRD10	NCOA6	PRDM10	0.327141	18	0.185133	0.262032	34	0.134382	Bottom10%	F
3339-Q15120_PDK3,X3338.Q15119_PDK2	PDK3	PDK2	0.923633	18	4.57e-08	0.925134	34	5.33e-15	Bottom10%	C+F+P
3389-Q15428_SF3A2,X1243.Q71UI9_H2AV	SF3A2	H2AZ2	0.913313	18	1.22e-07	0.799236	34	1.45e-08	Bottom10%	C
3389-Q15428_SF3A2,X2545.P62312_LSM6	SF3A2	LSM6	0.640867	18	0.00415955	0.632086	34	6.07e-05	Bottom10%	F+P
3389-Q15428_SF3A2,X2606.P67809_YBOX1	SF3A2	YBX1	0.558308	18	0.0160382	0.656532	34	2.48e-05	Bottom10%	F+P
3389-Q15428_SF3A2,X2685.P84103_SRSF3	SF3A2	SRSF3	0.601651	18	0.00825378	0.652559	34	2.88e-05	Bottom10%	F+P
3389-Q15428_SF3A2,X2729.Q01130_SRSF2	SF3A2	SRSF2	0.79773	18	7.3e-05	0.724675	34	1.26e-06	Bottom10%	F+P
3397-Q15468_STIL,X1390.P14635_CCNB1	STIL	CCNB1	0.75645	18	0.000280219	0.694118	34	5.29e-06	Bottom10%	F
3397-Q15468_STIL,X2932.Q12834_CDC20	STIL	CDC20	0.921569	18	5.62e-08	0.851795	34	1.68e-10	Bottom10%	C+F
3397-Q15468_STIL,X3662.Q53HL2_BOREA	STIL	CDCA8	0.869969	18	2.71e-06	0.77204	34	8.94e-08	Bottom10%	F
3424-Q15649_ZNHI3,X5552.Q96F46_I17RA	ZNHIT3	IL17RA	0.915152	10	0.000204472	0.0961039	21	0.678583	Top10%	C	z = 3.2820, p-value = 0.0010
3662-Q53HL2_BOREA,X1390.P14635_CCNB1	CDCA8	CCNB1	0.78741	18	0.00010501	0.695646	34	4.95e-06	Bottom10%	F
3662-Q53HL2_BOREA,X2932.Q12834_CDC20	CDCA8	CDC20	0.907121	18	2.07e-07	0.89152	34	1.54e-12	Bottom10%	C+F
3666-Q53RE8_ANR39,X4968.Q8TAA5_GRPE2	ANKRD39	GRPEL2	0.909091	12	4.19e-05	0.162055	23	0.460057	Top10%	C	z = 3.3852, p-value = 0.0007
378-O43167_ZBT24,X3295.Q14CW9_AT7L3	ZBTB24	ATXN7L3	0.90303	10	0.000343612	-0.000564653	22	0.99801	Top10%	C	z = 3.3676, p-value = 0.0008
378-O43167_ZBT24,X4581.Q8IX15_HOMEZ	ZBTB24	HOMEZ	0.942857	6	0.00480466	0.0764706	16	0.778341	Top10%	C	z = 2.6331, p-value = 0.0085
378-O43167_ZBT24,X5185.Q8WXI7_MUC16	ZBTB24	MUC16	1	4	0	0.116667	9	0.765008	Top10%	C	z = Inf, p-value = 0.0000
3791-Q5T4D3_TMTC4,X4727.Q8N4C6_NIN	TMTC4	NIN	1	4	0	-0.020979	12	0.948402	Top10%	C	z = Inf, p-value = 0.0000
3791-Q5T4D3_TMTC4,X5765.Q96PE3_INP4A	TMTC4	INPP4A	0.9	11	0.000159971	0.121542	23	0.580646	Top10%	C	z = 3.2273, p-value = 0.0012
382-O43181_NDUS4,X871.O95168_NDUB4	NDUFS4	NDUFB4	0.762642	18	0.000232967	0.736593	34	6.82e-07	Bottom10%	F+P
3900-Q687X5_STEA4,X4422.Q86VE9_SERC5	STEAP4	SERINC5	0.933333	9	0.0002359	0.110423	18	0.662698	Top10%	C	z = 3.2559, p-value = 0.0011
3936-Q6DN12_MCTP2,X4063.Q6PCB8_EMB	MCTP2	EMB	1	4	0	0.214286	8	0.610344	Top10%	C	z = Inf, p-value = 0.0000
4018-Q6P1A2_MBOA5,X6168.Q9BWD1_THIC	LPCAT3	ACAT2	0.124871	18	0.621526	0.13919	34	0.432403	Top10%	F
4018-Q6P1A2_MBOA5,X6552.Q9H7U1_CCSE2	LPCAT3	CCSER2	0.9	11	0.000159971	0.168421	20	0.477829	Top10%	C	z = 3.6759, p-value = 0.0002
4144-Q6UXY1_BI2L2,X2266.P51788_CLCN2	BAIAP2L2	CLCN2	0.909185	18	1.74e-07	0.826432	34	1.74e-09	Bottom10%	C
4144-Q6UXY1_BI2L2,X3338.Q15119_PDK2	BAIAP2L2	PDK2	0.271414	18	0.275952	0.286478	34	0.100467	Bottom10%	F
4459-Q86X55_CARM1,X1141.P07148_FABPL	CARM1	FABP1	0.232198	18	0.353838	0.204889	34	0.245075	Bottom10%	F
4459-Q86X55_CARM1,X213.O14686_KMT2D	CARM1	KMT2D	0.106295	18	0.67464	0.0313216	34	0.860415	Bottom10%	F
4459-Q86X55_CARM1,X2494.P61254_RL26	CARM1	RPL26	0.919505	18	6.87e-08	0.853323	34	1.44e-10	Bottom10%	C
4515-Q8IV08_PLD3,X4018.Q6P1A2_MBOA5	PLD3	LPCAT3	0.325077	18	0.188085	0.316119	34	0.068553	Top10%	F+P
4700-Q8N302_AGGF1,X5728.Q96MN5_TEAN2	AGGF1	TCEANC2	0.942857	6	0.00480466	0.2	11	0.555445	Top10%	C	z = 2.3049, p-value = 0.0212
4700-Q8N302_AGGF1,X7616.Q9Y251_HPSE	AGGF1	HPSE	1	4	0	0.15	9	0.700094	Top10%	C	z = Inf, p-value = 0.0000
4709-Q8N3F0_MTURN,X4774.Q8N5Y8_PAR16	MTURN	PARP16	1	4	0	0.047619	8	0.910849	Top10%	C	z = Inf, p-value = 0.0000
4709-Q8N3F0_MTURN,X6168.Q9BWD1_THIC	MTURN	ACAT2	0.915152	10	0.000204472	0.138961	21	0.548018	Top10%	C	z = 3.1845, p-value = 0.0015
4835-Q8NB78_KDM1B,X1493.P17931_LEG3	KDM1B	LGALS3	0.909185	18	1.74e-07	0.870741	34	2.18e-11	Bottom10%	C
4835-Q8NB78_KDM1B,X213.O14686_KMT2D	KDM1B	KMT2D	0.100103	18	0.69269	0.163636	34	0.355111	Bottom10%	F
5185-Q8WXI7_MUC16,X2918.Q11201_SIA4A	MUC16	ST3GAL1	0.892857	7	0.00680719	0.525275	14	0.0537475	Top10%	F
5422-Q96B97_SH3K1,X6003.Q9BR39_JPH2	SH3KBP1	JPH2	0.927273	10	0.000112035	0.0773574	22	0.732221	Top10%	C	z = 3.5307, p-value = 0.0004
554-O60524_NEMF,X2501.P61513_RL37A	NEMF	RPL37A	0.647059	18	0.00370153	0.596944	34	0.000193998	Bottom10%	F+P
5564-Q96FS4_SIPA1,X6407.Q9H211_CDT1	SIPA1	CDT1	0.964286	7	0.000454149	0.17402	17	0.50415	Top10%	C	z = 3.2240, p-value = 0.0013
5581-Q96GC5_RM48,X382.O43181_NDUS4	MRPL48	NDUFS4	0.256966	18	0.303309	0.160886	34	0.363365	Bottom10%	F
5581-Q96GC5_RM48,X5013.Q8TCC3_RM30	MRPL48	MRPL30	0.933953	18	1.48e-08	0.842934	34	3.99e-10	Bottom10%	C+F+P
5581-Q96GC5_RM48,X871.O95168_NDUB4	MRPL48	NDUFB4	0.339525	18	0.168071	0.241253	34	0.169281	Bottom10%	F
565-O60658_PDE8A,X3242.Q14623_IHH	PDE8A	IHH	0.90303	10	0.000343612	0.165443	22	0.461856	Top10%	C	z = 2.9887, p-value = 0.0028
565-O60658_PDE8A,X7142.Q9P0M2_AKA7G	PDE8A	AKAP7	-0.340659	14	0.233316	-0.261084	28	0.179612	Top10%	F
5942-Q99828_CIB1,X4304.Q7Z404_TMC4	CIB1	TMC4	0.902993	18	2.9e-07	0.909855	34	9.1e-14	Bottom10%	C
59-A6ZKI3_RTL8C,X1547.P20042_IF2B	RTL8C	EIF2S2	0.901099	13	2.61e-05	0.0446076	22	0.843739	Top10%	C	z = 3.6690, p-value = 0.0002
6003-Q9BR39_JPH2,X7508.Q9ULW8_PADI3	JPH2	PADI3	0.942857	6	0.00480466	0.232143	15	0.405099	Top10%	C	z = 2.3652, p-value = 0.0180
609-O75052_CAPON,X16.A1L170_CA226	NOS1AP	C1orf226	0.925697	18	3.69e-08	0.935523	34	4.44e-16	Bottom10%	C+F
6168-Q9BWD1_THIC,X4968.Q8TAA5_GRPE2	ACAT2	GRPEL2	-0.124871	18	0.621526	-0.22903	34	0.192606	Top10%	F
620-O75116_ROCK2,X6552.Q9H7U1_CCSE2	ROCK2	CCSER2	0.927273	11	3.97e-05	0.210526	20	0.37297	Top10%	C	z = 3.3233, p-value = 0.0009
6435-Q9H329_E41LB,X2090.P47902_CDX1	EPB41L4B	CDX1	0.942208	18	5.21e-09	0.852101	34	1.63e-10	Bottom10%	C
6478-Q9H4H8_FA83D,X1390.P14635_CCNB1	FAM83D	CCNB1	0.915377	18	1.01e-07	0.826432	34	1.74e-09	Bottom10%	C+F
6478-Q9H4H8_FA83D,X2932.Q12834_CDC20	FAM83D	CDC20	0.836945	18	1.49e-05	0.815432	34	4.27e-09	Bottom10%	F
6478-Q9H4H8_FA83D,X3662.Q53HL2_BOREA	FAM83D	CDCA8	0.754386	18	0.000297661	0.74576	34	4.16e-07	Bottom10%	F
6798-Q9NQV6_PRD10,X1141.P07148_FABPL	PRDM10	FABP1	0.900929	18	3.41e-07	0.911383	34	7.02e-14	Bottom10%	C
687-O75460_ERN1,X4063.Q6PCB8_EMB	ERN1	EMB	1	4	0	0.166667	8	0.693239	Top10%	C	z = Inf, p-value = 0.0000
687-O75460_ERN1,X4774.Q8N5Y8_PAR16	ERN1	PARP16	-0.109091	11	0.749509	-0.00902256	20	0.969885	Top10%	F
7032-Q9NXG6_P4HTM,X7690.Q9Y2U8_MAN1	P4HTM	LEMD3	0.902098	12	6e-05	0.219368	23	0.31456	Top10%	C	z = 3.1401, p-value = 0.0017
7351-Q9UI10_EI2BD,X1547.P20042_IF2B	EIF2B4	EIF2S2	-0.442724	18	0.0657824	-0.328342	34	0.0579765	Top10%	F+P
7351-Q9UI10_EI2BD,X7459.Q9UL33_TPC2L	EIF2B4	TRAPPC2L	0.916084	12	2.84e-05	0.201581	22	0.368337	Top10%	C	z = 3.3603, p-value = 0.0008
7434-Q9UKK3_PARP4,X3271.Q14764_MVP	PARP4	MVP	0.907121	18	2.07e-07	0.881742	34	5.69e-12	Bottom10%	C+F+P
7444-Q9UKT4_FBX5,X1390.P14635_CCNB1	FBXO5	CCNB1	0.807143	15	0.000275244	0.731527	29	6.53e-06	Bottom10%	F
7444-Q9UKT4_FBX5,X2932.Q12834_CDC20	FBXO5	CDC20	0.810714	15	0.000246008	0.757635	29	1.95e-06	Bottom10%	F+P
7444-Q9UKT4_FBX5,X3397.Q15468_STIL	FBXO5	STIL	0.757143	15	0.00108111	0.732512	29	6.25e-06	Bottom10%	F
7444-Q9UKT4_FBX5,X3662.Q53HL2_BOREA	FBXO5	CDCA8	0.917857	15	1.42e-06	0.80197	29	1.69e-07	Bottom10%	C+F
7594-Q9UQ80_PA2G4,X1504.P18124_RL7	PA2G4	RPL7	0.816305	18	3.6e-05	0.792208	34	2.38e-08	Bottom10%	F+P
7594-Q9UQ80_PA2G4,X2494.P61254_RL26	PA2G4	RPL26	0.626419	18	0.00541003	0.583193	34	0.000294819	Bottom10%	F+P
7594-Q9UQ80_PA2G4,X2498.P61353_RL27	PA2G4	RPL27	0.665635	18	0.00256833	0.543774	34	0.000887635	Bottom10%	F+P
7594-Q9UQ80_PA2G4,X2501.P61513_RL37A	PA2G4	RPL37A	0.727554	18	0.000621502	0.669366	34	1.5e-05	Bottom10%	F+P
7594-Q9UQ80_PA2G4,X2513.P61927_RL37	PA2G4	RPL37	0.550052	18	0.0180276	0.532162	34	0.00119765	Bottom10%	F+P
7594-Q9UQ80_PA2G4,X2559.P62750_RL23A	PA2G4	RPL23A	0.69453	18	0.00138177	0.628113	34	6.98e-05	Bottom10%	F+P
7594-Q9UQ80_PA2G4,X2565.P62829_RL23	PA2G4	RPL23	0.630547	18	0.00502514	0.511077	34	0.00200939	Bottom10%	F+P
7594-Q9UQ80_PA2G4,X2570.P62851_RS25	PA2G4	RPS25	0.589267	18	0.0100708	0.415737	34	0.0144731	Bottom10%	F+P
7594-Q9UQ80_PA2G4,X2573.P62861_RS30	PA2G4	FAU	0.696594	18	0.00131844	0.606112	34	0.000145198	Bottom10%	F+P
7594-Q9UQ80_PA2G4,X2578.P62899_RL31	PA2G4	RPL31	0.678019	18	0.0019852	0.705118	34	3.22e-06	Bottom10%	F+P
7594-Q9UQ80_PA2G4,X2606.P67809_YBOX1	PA2G4	YBX1	0.622291	18	0.00581855	0.590833	34	0.000234201	Bottom10%	F+P
7594-Q9UQ80_PA2G4,X2848.Q07020_RL18	PA2G4	RPL18	0.574819	18	0.012582	0.550497	34	0.00074259	Bottom10%	F+P
7594-Q9UQ80_PA2G4,X5799.Q96QT4_TRPM7	PA2G4	TRPM7	0.911249	18	1.46e-07	0.822765	34	2.36e-09	Bottom10%	C
7931-Q9Y6M9_NDUB9,X1730.P28331_NDUS1	NDUFB9	NDUFS1	0.845201	18	1.01e-05	0.748205	34	3.64e-07	Bottom10%	F+P
7931-Q9Y6M9_NDUB9,X382.O43181_NDUS4	NDUFB9	NDUFS4	0.909185	18	1.74e-07	0.85149	34	1.74e-10	Bottom10%	C+F+P
7931-Q9Y6M9_NDUB9,X871.O95168_NDUB4	NDUFB9	NDUFB4	0.78741	18	0.00010501	0.651031	34	3.06e-05	Bottom10%	F+P
7931-Q9Y6M9_NDUB9,X872.O95169_NDUB8	NDUFB9	NDUFB8	0.729618	18	0.000589052	0.659893	34	2.18e-05	Bottom10%	F+P
7931-Q9Y6M9_NDUB9,X896.O95298_NDUC2	NDUFB9	NDUFC2	0.742002	18	0.000422665	0.692895	34	5.59e-06	Bottom10%	F+P
7933-Q9Y6N5_SQOR,X4820.Q8N9Z2_CC71L	SQOR	CCDC71L	0.936017	18	1.15e-08	0.871963	34	1.89e-11	Bottom10%	C
872-O95169_NDUB8,X382.O43181_NDUS4	NDUFB8	NDUFS4	0.781218	18	0.000129364	0.819099	34	3.19e-09	Bottom10%	F+P
872-O95169_NDUB8,X871.O95168_NDUB4	NDUFB8	NDUFB4	0.905057	18	2.46e-07	0.898243	34	5.81e-13	Bottom10%	C+F+P
896-O95298_NDUC2,X1730.P28331_NDUS1	NDUFC2	NDUFS1	0.616099	18	0.00647797	0.710619	34	2.49e-06	Bottom10%	F+P
896-O95298_NDUC2,X382.O43181_NDUS4	NDUFC2	NDUFS4	0.816305	18	3.6e-05	0.824905	34	1.98e-09	Bottom10%	F+P
896-O95298_NDUC2,X871.O95168_NDUB4	NDUFC2	NDUFB4	0.929825	18	2.37e-08	0.87288	34	1.69e-11	Bottom10%	C+F+P
896-O95298_NDUC2,X872.O95169_NDUB8	NDUFC2	NDUFB8	0.911249	18	1.46e-07	0.924828	34	5.55e-15	Bottom10%	C+F+P

## Sheet: Table S3C
Table S3C: Functional annotation of the commonly occurring protein pairs (bottom 10% of the correlation difference) (CORUM sets)
geneSet	description	size	overlap	expect	enrichmentRatio	pValue	FDR	overlapId	userId
306	Ribosome, cytoplasmic	80	13	0.796486	16.3217	1.47e-13	5.58e-11	6129;6139;6136;6154;6155;6168;6167;6147;9349;6230;2197;6160;6141	RPS25;RPL37;RPL7;RPL23A;RPL26;RPL17;RPL27;RPL37A;RPL12;RPL18;FAU;RPL23;RPL31
308	60S ribosomal subunit, cytoplasmic	47	11	0.467936	23.5075	2.19e-13	5.58e-11	6129;6139;6136;6154;6155;6168;6167;6147;9349;6160;6141	RPL37;RPL7;RPL23A;RPL26;RPL17;RPL27;RPL37A;RPL12;RPL18;RPL23;RPL31
3055	Nop56p-associated pre-rRNA complex	104	12	1.03543	11.5894	1.05e-10	1.79e-08	6129;6139;6136;4670;6154;6155;6168;6147;9349;6160;4904;6141	RPL7;RPL23A;RPL26;RPL17;RPL27;RPL37A;HNRNPM;RPL12;RPL18;RPL23;YBX1;RPL31
178	Respiratory chain complex I (holoenzyme), mitochondrial	44	6	0.438067	13.6965	3.31e-06	0.000421	4724;4710;4714;4718;4719;4715	NDUFS4;NDUFB4;NDUFB8;NDUFB9;NDUFC2;NDUFS1
2914	Respiratory chain complex I (beta subunit) mitochondrial	16	4	0.159297	25.1103	1.37e-05	0.001396	4710;4714;4718;4715	NDUFB4;NDUFB8;NDUFB9;NDUFC2
5380	TRBP containing complex (DICER, RPL7A, EIF6, MOV10 and subunits of the 60S ribosomal particle)	25	4	0.248902	16.0706	8.94e-05	0.007586	6129;6136;6155;6168	RPL7;RPL27;RPL37A;RPL12
2948	Respiratory chain complex I (incomplete intermediate), mitochondrial	11	3	0.109517	27.393	0.000141	0.01025	4724;4714;4719	NDUFS4;NDUFB8;NDUFS1
1400	ASCOM complex	7	2	0.069693	28.6975	0.001959	0.124619	8085;23054	KMT2D;NCOA6
6467	MLL4 complex	9	2	0.089605	22.3203	0.003316	0.168783	8085;23054	KMT2D;NCOA6
6838	IGF2BP1 complex	9	2	0.089605	22.3203	0.003316	0.168783	6154;4904	RPL26;YBX1
3075	UTX-MLL2/3 complex	12	2	0.119473	16.7402	0.005967	0.276087	8085;23054	KMT2D;NCOA6
563	F1F0-ATP synthase, mitochondrial	16	2	0.159297	12.5551	0.010581	0.414298	10476;522	ATP5PD;ATP5PF
2920	Respiratory chain complex I (lambda subunit) mitochondrial	16	2	0.159297	12.5551	0.010581	0.414298	4724;4719	NDUFS4;NDUFS1
338	40S ribosomal subunit, cytoplasmic	31	2	0.308638	6.48008	0.037365	1	6230;2197	RPS25;FAU
247	RalBP1-CCNB1-AP2A-NUMB-EPN1 complex	5	1	0.04978	20.0882	0.048827	1	891	CCNB1
5179	NCOA6-DNA-PK-Ku-PARP1 complex	5	1	0.04978	20.0882	0.048827	1	23054	NCOA6
351	Spliceosome	142	4	1.41376	2.82933	0.050519	1	11157;6428;6427;8175	SF3A2;SRSF3;LSM6;SRSF2
310	Cell cycle kinase complex CDC2	6	1	0.059736	16.7402	0.058311	1	891	CCNB1
561	LSm1-7 complex	7	1	0.069693	14.3487	0.067703	1	11157	LSM6
562	LSm2-8 complex	7	1	0.069693	14.3487	0.067703	1	11157	LSM6
1746	SMN containing complex	7	1	0.069693	14.3487	0.067703	1	3958	LGALS3
324	39S ribosomal subunit, mitochondrial	48	2	0.477892	4.18505	0.081669	1	51263;51642	MRPL30;MRPL48
5195	PTIP-HMT complex	9	1	0.089605	11.1601	0.086215	1	23054	NCOA6
6461	MLL3 complex	9	1	0.089605	11.1601	0.086215	1	23054	NCOA6
86	NUMAC complex (nucleosomal methylation activator complex)	10	1	0.099561	10.0441	0.095337	1	10498	CARM1
2904	Respiratory chain complex I (intermediate VII/650kD), mitochondrial	10	1	0.099561	10.0441	0.095337	1	4724	NDUFS4
6460	MLL2 complex	10	1	0.099561	10.0441	0.095337	1	8085	KMT2D

## Sheet: Table S3D
Table S3D: Functional annotation of the KRAS-specific protein pairs (top 10% of correlation coefficients of differential gene pairs) (KEGG pathway sets)
geneSet	description	size	overlap	expect	enrichmentRatio	pValue	FDR	overlapId	userId
hsa05205	Proteoglycans in cancer	198	5	0.844175	5.92294	0.001359	0.446988	10855;287;3549;4659;9475	ANK2;HPSE;IHH;PPP1R12A;ROCK2
hsa04360	Axon guidance	175	4	0.746115	5.36111	0.006141	0.611447	29984;3984;5880;9475	LIMK1;RAC2;RHOD;ROCK2
hsa04510	Focal adhesion	199	4	0.848439	4.71454	0.009603	0.611447	1282;4659;5880;9475	COL4A1;PPP1R12A;RAC2;ROCK2
hsa04015	Rap1 signaling pathway	206	4	0.878284	4.55434	0.010812	0.611447	10636;4804;5880;6494	NGFR;RAC2;RGS14;SIPA1
hsa04670	Leukocyte transendothelial migration	112	3	0.477513	6.28255	0.011688	0.611447	5880;6494;9475	RAC2;ROCK2;SIPA1
hsa04810	Regulation of actin cytoskeleton	213	4	0.908128	4.40466	0.012116	0.611447	3984;4659;5880;9475	LIMK1;PPP1R12A;RAC2;ROCK2
hsa04975	Fat digestion and absorption	41	2	0.174804	11.4414	0.01301	0.611447	1056;39	ACAT2;CEL
hsa05416	Viral myocarditis	59	2	0.251547	7.95079	0.025889	1	3105;5880	HLA-A;RAC2
hsa03013	RNA transport	166	3	0.707743	4.23883	0.032908	1	348995;8890;8894	EIF2B4;EIF2S2;NUP43
hsa00072	Synthesis and degradation of ketone bodies	10	1	0.042635	23.4548	0.041852	1	39	ACAT2
