# Supplementary material for: Integrative analysis of cancer dependency data and comprehensive phosphoproteomics data revealed the EPHA2-PARD3 axis as a cancer vulnerability in KRAS-mutant colorectal cancer
Source: Royal Society of Chemistry journal article supplement (doi:10.1039/d3mo00042g), 2023-05-16
Supplement: d3mo00042g6.xlsx [file d3mo00042g6.xlsx]

## Sheet: Table S4
Table S4: Pairwise correlation analysis of each phosphorylation level of phosphorylation sites with the gene dependence scores of the corresponding phosphoproteins, related to Figure 4
NOTE: Of the 35 CRC cell lines, 28 cell lines shared with CRISPR-Cas9 knockout screens data and our phosphoproteomic data. We performed pairwise spearman correlation analysis only when at least half of the samples (14/28 cell lines) had quantitative values (29585/40744 phosphosites).
CRC35 phosphoproteomic data																																				High-throughput CRISPR-Cas9 knockout screens data (DepMap Public 22Q2 CRISPR_gene_dependency.csv)
Unique identifier	DepMap ID/ site number	Number	Number-Sequence	entrezgene	symbol	C2BBe1	CCK-81	COLO205	GP5d	HCT116	HCT-15	HT115	HT29	HT55	LoVo	LS1034	LS123	LS180	LS411N	LS513	MDST8	NCI-H716	NCI-H747	RCM-1	RKO	SNU-C1	SW1116	SW1463	SW48	SW620	SW837	SW948	T84	Number of valid value [/28]		DepMap_ID	C2BBe1	CCK-81	COLO205	GP5d	HCT116	HCT-15	HT115	HT29	HT55	LoVo	LS1034	LS123	LS180
UID15	E2F8..79733./8	8	8-GAESILSGKENSSALSPNHRIYSSPIAGVIP	79733	E2F8	0.347412	0.832008	-0.280225	0.319184	-0.499104	-0.203227	-0.219512	-0.444446	0.130341	-0.500644	0.00331664	-0.279147	0.341633	-0.158932	-0.330883	-0.00500345	0.467548	0.592815	0.113257	-0.359509	0.65258	0.326011	0.468371	-0.171711	-0.426594	-0.566706	-0.00627343	0.36951	28		E2F8..79733.	0.0115	0.123	0.0355	0.0241	0.0257	0.0907	0.0213	0.00392	0.0257	0.0168	0.00122	0.625	0.0346
UID18	E2F8..79733./9	9	9-KSIESDRRKINSAPSSPIKTNKAESSQNSAP	79733	E2F8	0.441463	0.101488	-0.328838	0.149791	-0.100095	0.790006	-0.0694774	0.0816075	0.594177	-0.578046	0.18768	0.220248	0.292853	0.318527	-0.374485	-0.233745	0.167183	0.727381	0.0364606	0.22817	-0.430939	0.381436	-0.0730516	-0.168658	-0.02292	0.00351715	-0.301975	1.14284	28		E2F8..79733.	0.0115	0.123	0.0355	0.0241	0.0257	0.0907	0.0213	0.00392	0.0257	0.0168	0.00122	0.625	0.0346
UID19	E2F8..79733./10	10	10-PWTPTANLKMLISAVSPEIRNRDQKRGLFDN	79733	E2F8	0.140418	0.172834	0.366201	-0.0346424	-0.167289	0.0255087	-0.0675427	-0.0875502	0.0959986	0.102467	-0.0150011	0.243823	0.170234	0.248143	0.11368	0.421576	0.280618	0.543103	0.0422888	0.214896	0.26833	0.185153	0.194005	0.108741	-0.1531	0.00301298	0.0185339	0.145632	28		E2F8..79733.	0.0115	0.123	0.0355	0.0241	0.0257	0.0907	0.0213	0.00392	0.0257	0.0168	0.00122	0.625	0.0346
UID20	UBA6..55236./11	11	11-FPLDIRLKDGSLFWQSPKRPPSPIKFDLNEP	55236	UBA6	0.139248	-0.131682	NA	NA	NA	NA	0.18529	NA	NA	NA	-0.0259838	0.376612	NA	NA	-0.0479279	0.0811071	0.706204	NA	-0.11338	0.170639	NA	NA	-0.167735	NA	0.269571	0.279272	0.440079	NA	14		UBA6..55236.	0.637	0.0529	0.403	0.354	0.516	0.855	0.397	0.583	0.0278	0.318	0.071	0.0901	0.53
UID22	ESYT2..57488./12	12	12-LLASPGHISVKEPTPSIASDISLPIATQELR	57488	ESYT2	-0.0879105	-0.0414424	-0.198752	0.067431	0.0602516	-0.0796657	-0.0438035	-0.124237	-0.0993215	0.0177846	-0.0476451	0.20388	-0.0521228	-0.063316	0.338703	0.0657434	-0.0943659	-0.0218616	-0.0895745	-0.0349577	-0.186767	-0.0175015	-0.216517	0.257488	0.0997305	0.0429487	0.0482306	0.281477	28		ESYT2..57488.	0.0376207	0.0256444	0.0205409	0.0701292	0.00490202	0.0446124	0.0143326	0.0194883	0.0716722	0.018447	0.149611	0.0149506	0.00941373
UID23	ESYT2..57488./13	13	13-SPGHISVKEPTPSIASDISLPIATQELRQRL	57488	ESYT2	0.0560651	0.092916	0.313695	0.237183	0.399372	-0.224246	0.336442	0.256637	0.226463	0.189107	0.253017	0.50068	0.358544	0.217095	0.33994	-0.0728588	-0.14635	0.0769512	0.131977	0.120348	0.278957	0.245114	0.430115	0.421361	0.430724	0.17425	1.01406	-0.0880578	28		ESYT2..57488.	0.0376207	0.0256444	0.0205409	0.0701292	0.00490202	0.0446124	0.0143326	0.0194883	0.0716722	0.018447	0.149611	0.0149506	0.00941373
UID24	ESYT2..57488./14	14	14-HISVKEPTPSIASDISLPIATQELRQRLRQL	57488	ESYT2	0.140922	0.236021	0.37872	-0.178967	0.0949998	0.0248108	0.267725	0.215842	-0.128581	0.754985	-0.0847473	0.267182	0.15482	0.0473027	0.287376	0.0463867	0.134212	0.566744	0.818911	-0.0934939	0.205832	0.221387	0.00529051	0.32696	0.171251	-0.0418878	-0.0698099	0.121421	28		ESYT2..57488.	0.0376207	0.0256444	0.0205409	0.0701292	0.00490202	0.0446124	0.0143326	0.0194883	0.0716722	0.018447	0.149611	0.0149506	0.00941373
UID25	ESYT2..57488./15	15	15-PPSRAEAGVRRSRVPSEGRWRGAEPPGISAS	57488	ESYT2	2.14602	-0.077045	NA	0.100284	NA	-0.35856	0.490009	0.0639181	0.824451	1.20636	-0.279142	0.381508	-0.131653	-0.543247	0.535892	0.685777	1.39221	0.915205	0.760102	0.289327	NA	NA	0.293398	0.878737	0.261526	-0.344151	0.773916	0.178966	24		ESYT2..57488.	0.0376207	0.0256444	0.0205409	0.0701292	0.00490202	0.0446124	0.0143326	0.0194883	0.0716722	0.018447	0.149611	0.0149506	0.00941373
UID32	UHRF1BP1L..23074./19	19	19-NVEMLKQAVKDHNVGSPPKSPTHASPQHTQT	23074	BLTP3B	-0.0606116	0.456121	0.118094	0.225906	-0.592929	0.0676312	-0.00101948	-0.0774361	-0.00152508	0.204622	0.0682953	-0.608841	0.380592	0.681152	-0.417921	-0.179462	0.492415	-0.339387	0.233609	0.0609724	-0.454731	-0.192658	-0.205938	0.1163	0.0942364	0.388325	0.490408	-0.150565	28		UHRF1BP1L..23074.	0.0231	0.0104	0.126	0.0298	0.0126	0.00235	0.01	0.0163	0.00464	0.00704	0.637	0.0458	0.0139
UID36	UHRF1BP1L..23074./22	22	22-SETSDKKDSFYTDSSSILNYREDSNILSFDS	23074	BLTP3B	-0.142802	-0.279	NA	NA	NA	NA	-0.365258	NA	NA	NA	-0.529978	0.359967	NA	NA	-0.443328	-0.129368	-0.147712	NA	-0.525639	-0.363736	NA	NA	-0.595346	NA	-0.499175	-0.763403	-0.674245	NA	14		UHRF1BP1L..23074.	0.0231	0.0104	0.126	0.0298	0.0126	0.00235	0.01	0.0163	0.00464	0.00704	0.637	0.0458	0.0139
UID37	UHRF1BP1L..23074./23	23	23-LAGRLKRKKLLKEYYSTESEPLTNGGQKPSS	23074	BLTP3B	NA	-0.320862	-1.1856	-0.14703	-0.216938	-0.517207	-0.712907	0.492251	-0.443613	-1.26473	0.350966	0.0822096	-0.151652	NA	-0.177217	-0.643138	-1.07421	-0.555526	-0.303468	-0.677306	NA	0.0674267	-0.152064	-0.754613	0.0802641	-0.427864	NA	-0.3865	24		UHRF1BP1L..23074.	0.0231	0.0104	0.126	0.0298	0.0126	0.00235	0.01	0.0163	0.00464	0.00704	0.637	0.0458	0.0139
UID39	UHRF1BP1L..23074./24	24	24-LSHIPLKDPLLFKSASDTNLQKGISFMDYLS	23074	BLTP3B	1.2067	0.629241	0.00558519	0.599666	0.202269	0.645015	1.52535	0.310456	0.218734	0.299719	0.306967	-0.383167	0.0953763	0.0741723	-0.562667	-0.165962	0.827367	-0.085974	0.59593	-0.814181	0.872813	-0.466036	0.118693	-0.160157	-0.79555	-0.236607	0.354923	0.471813	28		UHRF1BP1L..23074.	0.0231	0.0104	0.126	0.0298	0.0126	0.00235	0.01	0.0163	0.00464	0.00704	0.637	0.0458	0.0139
UID40	UHRF1BP1L..23074./25	25	25-LGKISEDESSGLVYKSGSGEIGSETSDKKDS	23074	BLTP3B	0.64029	0.15846	-0.440725	0.317855	-0.0470366	-0.380738	0.243622	-0.357066	-0.277696	-0.874931	0.022765	-0.79814	-0.357797	-0.321998	-0.846049	-0.270473	-0.213288	-0.568179	-0.28492	-0.61217	-0.100503	-0.66023	-0.437209	-0.269205	-0.843143	-0.379693	0.217398	NA	27		UHRF1BP1L..23074.	0.0231	0.0104	0.126	0.0298	0.0126	0.00235	0.01	0.0163	0.00464	0.00704	0.637	0.0458	0.0139
UID41	UHRF1BP1L..23074./26	26	26-KISEDESSGLVYKSGSGEIGSETSDKKDSFY	23074	BLTP3B	0.745999	0.148008	-0.471125	0.34884	0.0465768	-0.305542	0.337351	-0.105843	-0.0943348	-1.00899	-0.0349952	-0.721829	-0.307679	-0.387974	-0.964143	-0.322197	-0.2209	-0.707703	-0.315748	-0.761347	-0.0234057	-0.729607	-0.511214	-0.476749	-1.13098	-0.525036	0.231352	0.0136452	28		UHRF1BP1L..23074.	0.0231	0.0104	0.126	0.0298	0.0126	0.00235	0.01	0.0163	0.00464	0.00704	0.637	0.0458	0.0139
UID42	UHRF1BP1L..23074./27	27	27-NRIRSVTVNHMSDNRSMSVDLSHIPLKDPLL	23074	BLTP3B	1.11216	-0.198954	0.199267	0.52456	0.162086	-0.946956	-0.472226	NA	0.217339	-0.455027	-0.0588851	0.068181	NA	NA	-0.795923	-0.0998246	1.6594	-0.48664	0.022007	-0.520641	NA	0.369071	-0.550553	-0.971584	-0.724181	-0.20239	-0.658743	0.521247	24		UHRF1BP1L..23074.	0.0231	0.0104	0.126	0.0298	0.0126	0.00235	0.01	0.0163	0.00464	0.00704	0.637	0.0458	0.0139
UID43	UHRF1BP1L..23074./28	28	28-IRSVTVNHMSDNRSMSVDLSHIPLKDPLLFK	23074	BLTP3B	1.32885	-0.293084	-0.264602	-0.599817	0.0632691	-0.694748	-0.241831	0.836229	-0.370262	-0.173281	-0.0582256	0.457377	-0.288005	-0.605654	-0.839826	-0.568225	1.87547	-0.475806	-0.0940843	-0.405449	1.83901	-0.359619	-0.626284	-0.55722	-0.714491	-0.236835	-0.0655929	-0.301427	28		UHRF1BP1L..23074.	0.0231	0.0104	0.126	0.0298	0.0126	0.00235	0.01	0.0163	0.00464	0.00704	0.637	0.0458	0.0139
UID45	UHRF1BP1L..23074./29	29	29-VDQANTLKSPVSESVSPVVPDYLPTENGDFL	23074	BLTP3B	0.471988	-0.27591	-0.497673	-0.109623	0.15541	-0.366808	0.261993	-0.337108	-0.168971	-0.917581	-0.169758	-0.424833	-0.198797	-0.477632	-0.396128	0.0665755	-0.0193367	-0.483685	-0.628593	-0.251915	-0.159664	-0.893554	-0.201186	-0.658674	-0.571747	-0.106135	-0.0268714	0.0699234	28		UHRF1BP1L..23074.	0.0231	0.0104	0.126	0.0298	0.0126	0.00235	0.01	0.0163	0.00464	0.00704	0.637	0.0458	0.0139
UID48	UHRF1BP1L..23074./31	31	31-YDLKKQRSVTQATQTSPGVPWPSQSANFPEF	23074	BLTP3B	-0.0910716	-0.401734	-0.444473	-0.206362	0.289548	-0.200078	0.232308	0.0185623	0.137308	-0.169329	0.0172302	0.0240545	-0.175242	-0.108386	-0.422587	0.516925	0.0101879	-0.348802	0.0850531	0.115185	-0.216663	-0.745944	-0.21768	-0.159134	-0.32227	-0.252789	-0.12546	0.320946	28		UHRF1BP1L..23074.	0.0231	0.0104	0.126	0.0298	0.0126	0.00235	0.01	0.0163	0.00464	0.00704	0.637	0.0458	0.0139
UID52	SHTN1..57698./32	32	32-TALNKKTLEAEFNSPSPPTPEPGEGPRKLEG	57698	SHTN1	0.186883	0.426305	0.315516	0.240666	0.00873756	0.149121	-0.083265	0.0051562	-0.0766533	-0.345167	0.237868	-0.598848	-0.00820859	0.0133193	0.105246	-0.544223	-0.511118	0.0140793	-0.374649	-0.539549	-0.0150134	0.16483	-0.0582226	-0.068272	0.487981	0.211508	0.0487475	0.128315	28		SHTN1..57698.	0.0356106	0.00258952	0.0252329	0.00373514	0.111236	0.0202328	0.00359454	0.0116455	0.0148857	0.00623531	0.0229462	0.0360031	0.011822
UID54	SHTN1..57698./33	33	33-RILRRRKVTAEADSSSPTGILATSESKSMPV	57698	SHTN1	0.601409	0.497883	0.552139	0.484899	0.6884	0.273935	0.377608	0.356287	-0.0797442	0.346671	0.408903	-0.169996	0.284125	0.0110645	0.373753	-0.360049	0.00297594	-0.141217	0.0592464	-0.491009	-0.166754	0.0515865	0.0393173	-0.150988	0.493341	0.546419	0.0140618	0.586875	28		SHTN1..57698.	0.0356106	0.00258952	0.0252329	0.00373514	0.111236	0.0202328	0.00359454	0.0116455	0.0148857	0.00623531	0.0229462	0.0360031	0.011822
UID55	SHTN1..57698./34	34	34-LATKLNKENKTLKRISMLYMAKLGPDVITEE	57698	SHTN1	0.877023	0.743458	1.53836	NA	0.462296	NA	NA	NA	NA	1.10245	0.653128	NA	NA	0.304251	0.359305	-0.0777016	0.21955	0.24502	0.170076	NA	1.74972	1.0815	0.776478	NA	NA	-0.154745	0.824818	NA	17		SHTN1..57698.	0.0356106	0.00258952	0.0252329	0.00373514	0.111236	0.0202328	0.00359454	0.0116455	0.0148857	0.00623531	0.0229462	0.0360031	0.011822
UID56	SHTN1..57698./35	35	35-FAQEMFIEQNKLKRQSHLLLQSSIPDQQLLK	57698	SHTN1	0.854801	0.933721	0.77091	0.106735	0.386944	-0.336302	0.121514	NA	-0.33709	1.15471	0.392344	0.310785	NA	0.0368242	0.11587	0.480127	-0.235235	NA	0.525238	-0.403594	0.552907	1.19325	0.18147	-0.351173	-0.457476	0.219482	0.306764	1.04137	25		SHTN1..57698.	0.0356106	0.00258952	0.0252329	0.00373514	0.111236	0.0202328	0.00359454	0.0116455	0.0148857	0.00623531	0.0229462	0.0360031	0.011822
UID58	SHTN1..57698./36	36	36-DSSSPTGILATSESKSMPVLGSVSSVTKTAL	57698	SHTN1	-0.316563	1.50135	0.913955	0.632046	0.810061	0.61386	0.389966	0.248901	0.332188	1.07014	-0.0849503	0.802948	0.0753679	0.223303	0.418458	0.277734	0.374276	-0.0644819	0.058581	-0.286491	0.367549	-0.169075	0.360911	-0.183671	-0.210807	0.249233	-0.175891	0.671537	28		SHTN1..57698.	0.0356106	0.00258952	0.0252329	0.00373514	0.111236	0.0202328	0.00359454	0.0116455	0.0148857	0.00623531	0.0229462	0.0360031	0.011822
UID63	ARHGAP10..79658./38	38	38-TPPDTTFPEPTCLSASPPNAPPRQSKRQGQR	79658	ARHGAP10	0.388443	-0.338064	-0.714697	-0.0644024	0.454249	0.0353456	-0.3103	-0.171733	-0.526892	-0.311274	-0.614541	0.162989	0.128251	-0.189616	-0.464318	0.489632	0.0520031	0.193605	0.171479	0.34711	-1.00857	-0.376561	-0.0597816	-0.254742	-0.244882	0.0357056	-0.0640972	-0.464613	28		ARHGAP10..79658.	0.00935525	0.0153571	0.0093722	0.00266821	0.0101776	0.0112848	0.00961028	0.0074096	0.058281	0.0466797	0.0270269	0.0145613	0.0202445
UID69	BICDL2..146439./39	39	39-SGDEGFFPFVLERRDSFLGGGPGPEEPEDLA	146439	BICDL2	0.388296	-0.0649362	2.35571	0.545103	0.25766	0.282334	-0.0218795	0.0511344	1.77031	2.23358	-0.356652	1.16992	-0.115261	1.0117	1.44414	-0.112536	-0.167057	-0.188532	-0.334976	0.0482771	3.55209	2.28757	0.0438021	0.495901	0.0534515	1.60065	0.150129	1.56774	28		BICDL2..146439.	0.12462	0.3437	0.332398	0.210308	0.191494	0.123363	0.174755	0.142994	0.269241	0.254768	0.233418	0.140036	0.195234
UID70	BICDL2..146439./40	40	40-AGEALSALRRLQRRVSELEEESRLQDADVSA	146439	BICDL2	0.0196191	0.0532235	1.10296	0.11216	0.398066	-0.0481637	0.806507	0.30409	0.702907	1.54958	0.458959	1.05012	0.60269	0.281771	1.6277	0.386313	0.46053	1.20498	0.722226	-0.0872808	1.02416	0.873445	0.438303	0.332891	-0.188288	0.611129	0.438294	1.05317	28		BICDL2..146439.	0.12462	0.3437	0.332398	0.210308	0.191494	0.123363	0.174755	0.142994	0.269241	0.254768	0.233418	0.140036	0.195234
UID71	ARHGEF37..389337./41	41	41-GQRGYVPSGFLARARSPVLWGWSLPS_____	389337	ARHGEF37	-0.13685	-0.0332613	-0.277979	-0.0430758	-0.150714	0.349234	0.220297	-0.246917	-0.26318	0.915071	-0.0351648	0.409922	-0.579725	-0.0631886	-0.152089	-0.0245142	0.0926943	0.130751	0.0745382	-0.0633168	-0.0853748	0.59895	0.389993	0.448472	-0.0162392	1.28756	0.000705719	0.252988	28		ARHGEF37..389337.	0.0708411	0.0997779	0.005257	0.0239812	0.0107848	0.0253531	0.0422417	0.0485004	0.0577451	0.0238095	0.0540661	0.0229185	0.0180982
UID72	FAM168B..130074./42	42	42-FQTGYTPGTPYKVSCSPTSGAVPPYSSSPNP	130074	FAM168B	0.167068	0.362004	NA	NA	NA	NA	0.0697012	NA	NA	NA	-0.16292	-0.305848	NA	NA	-0.38523	0.046279	-0.176766	NA	-0.151938	0.00736284	NA	NA	-0.0423508	NA	0.0234175	-0.117214	-0.0739565	NA	14		FAM168B..130074.	0.130266	0.0179849	0.0212286	0.0727279	0.0529761	0.158034	0.0938391	0.0700104	0.0924414	0.0264391	0.182111	0.129753	0.0403237
UID76	C1orf226..400793./44	44	44-SQDESKLKMTECRRASSPSLIERNGFKLSLS	400793	C1orf226	-0.192439	0.0292776	0.926086	0.452687	0.117424	0.228905	0.302182	-0.261894	1.62374	1.7656	0.348979	1.27894	0.722786	-0.39942	1.4231	0.258675	0.923807	0.620061	0.94641	0.167203	0.49376	0.117062	0.986908	0.0789886	-0.331724	0.727353	1.2713	0.734531	28		C1orf226..400793.	0.0292693	0.134487	0.0152445	0.0522068	0.113041	0.043526	0.0456255	0.037859	0.0277326	0.115395	0.0152604	0.0357254	0.0754558
UID77	C1orf226..400793./45	45	45-QDESKLKMTECRRASSPSLIERNGFKLSLSP	400793	C1orf226	-0.278494	-0.0919642	1.25878	0.795365	0.952025	1.00801	1.26207	0.356685	1.46873	1.85785	0.33503	0.848434	1.82666	1.59464	1.55924	0.0777925	-0.280544	0.900338	1.01681	-1.22165	0.163016	1.67288	0.694906	0.354615	0.161998	1.88815	1.53701	0.982226	28		C1orf226..400793.	0.0292693	0.134487	0.0152445	0.0522068	0.113041	0.043526	0.0456255	0.037859	0.0277326	0.115395	0.0152604	0.0357254	0.0754558
UID81	C1orf226..400793./46	46	46-SSPSLIERNGFKLSLSPISLAESWEDGSPPP	400793	C1orf226	-0.0874648	0.00267792	0.289048	0.211176	0.276011	-0.0561601	0.0783992	0.133379	0.497544	-0.0284808	0.110609	0.295485	0.168667	-0.0391412	0.275002	0.0487761	-0.137024	-0.353767	-0.0552216	0.00575304	0.822618	0.311124	-0.119015	0.0196133	0.0763655	0.330845	0.266378	0.217161	28		C1orf226..400793.	0.0292693	0.134487	0.0152445	0.0522068	0.113041	0.043526	0.0456255	0.037859	0.0277326	0.115395	0.0152604	0.0357254	0.0754558
UID83	C1orf226..400793./48	48	48-LSLSPISLAESWEDGSPPPQARTSSLDNEGP	400793	C1orf226	-0.139151	0.00701984	0.520503	-0.0421062	0.351048	-0.0366702	1.0138	0.0736192	0.373832	0.336004	-0.00628964	0.467092	0.483902	0.53723	0.656495	0.150205	-0.0151588	0.267607	0.372317	0.161845	0.00877508	0.0738649	0.336842	-0.10213	0.0741329	0.461599	0.230213	0.140457	28		C1orf226..400793.	0.0292693	0.134487	0.0152445	0.0522068	0.113041	0.043526	0.0456255	0.037859	0.0277326	0.115395	0.0152604	0.0357254	0.0754558
UID85	C1orf226..400793./49	49	49-ENLNTALTPKLQASRSFPHLSKPVAPGSAPL	400793	C1orf226	0.357867	-0.0263305	1.14241	0.695315	0.663654	NA	1.72034	0.536062	NA	2.49044	0.652327	1.4584	1.26218	0.751523	1.01731	-0.105185	1.01421	1.18698	1.37227	-0.845653	1.55714	0.739396	1.1899	0.442519	-0.138806	1.61863	1.69923	NA	25		C1orf226..400793.	0.0292693	0.134487	0.0152445	0.0522068	0.113041	0.043526	0.0456255	0.037859	0.0277326	0.115395	0.0152604	0.0357254	0.0754558
UID89	C1orf226..400793./51	51	51-REERGKVLPNGEVSLSVPDLIHKDSQDESKL	400793	C1orf226	0.0225867	-0.183061	1.10769	0.424234	0.241857	0.848754	0.790358	0.79103	1.75813	2.13538	0.326115	1.87555	1.22817	0.848739	1.3607	0.210991	0.727292	1.02081	1.55593	-0.34931	1.20379	1.83095	1.29991	0.30835	0.258362	1.77049	2.57434	0.958198	28		C1orf226..400793.	0.0292693	0.134487	0.0152445	0.0522068	0.113041	0.043526	0.0456255	0.037859	0.0277326	0.115395	0.0152604	0.0357254	0.0754558
UID94	PLEKHG3..26030./54	54	54-PPLQWEKVAPERDGKSPTVPCLQEEAGEPLG	26030	PLEKHG3	1.09657	-0.193248	0.227013	-0.114667	0.206907	-0.0946733	0.326818	-0.0518141	-0.00997845	0.469374	0.0103482	0.577392	0.17091	-0.089351	0.539159	0.113775	-0.18199	-0.199743	0.772395	0.125829	0.384617	1.57484	0.110412	-0.0952129	-0.0427367	0.17341	0.172806	0.586283	28		PLEKHG3..26030.	0.0387582	0.00567946	0.00905577	0.0145348	0.0185029	0.0450576	0.0822734	0.0145573	0.00194783	0.00744362	0.00180946	0.0198205	0.00273745
UID95	PLEKHG3..26030./55	55	55-NAEHHDAGFSVRRRESLSYIPKGLVRNSISR	26030	PLEKHG3	1.65284	-0.482392	0.412901	-0.469366	-0.0194028	0.549702	0.729506	0.218625	0.104144	1.4867	0.0367726	2.2162	0.265828	0.053182	1.04405	-0.391463	0.718197	0.751883	1.53889	0.361723	2.42137	2.03812	0.407038	-0.107238	-0.991154	0.856684	0.0135716	1.35019	28		PLEKHG3..26030.	0.0387582	0.00567946	0.00905577	0.0145348	0.0185029	0.0450576	0.0822734	0.0145573	0.00194783	0.00744362	0.00180946	0.0198205	0.00273745
UID96	PLEKHG3..26030./56	56	56-EHHDAGFSVRRRESLSYIPKGLVRNSISRFN	26030	PLEKHG3	1.31514	-0.397809	NA	NA	NA	NA	0.590177	NA	NA	NA	-0.0843267	1.91561	NA	NA	0.749619	-0.00447464	0.571804	NA	1.24579	0.10931	NA	NA	0.00855923	NA	0.251946	0.605029	0.312676	NA	14		PLEKHG3..26030.	0.0387582	0.00567946	0.00905577	0.0145348	0.0185029	0.0450576	0.0822734	0.0145573	0.00194783	0.00744362	0.00180946	0.0198205	0.00273745
UID97	PLEKHG3..26030./57	57	57-YIPKGLVRNSISRFNSLPRPDPEPVPPVGSK	26030	PLEKHG3	NA	-0.719004	0.802832	-0.705544	-0.340138	0.581877	0.0636673	0.301991	-0.0677433	0.358094	0.221123	0.700808	0.685101	NA	0.222444	-0.0969658	-0.460037	0.253137	0.296845	-0.100614	NA	0.253412	-0.579463	-0.551096	-0.154396	-0.326624	NA	0.420292	24		PLEKHG3..26030.	0.0387582	0.00567946	0.00905577	0.0145348	0.0185029	0.0450576	0.0822734	0.0145573	0.00194783	0.00744362	0.00180946	0.0198205	0.00273745
UID98	PLEKHG3..26030./58	58	58-LDQASVIAERFVSSFSRRSSVAQEDSKSSGF	26030	PLEKHG3	0.860741	-0.881278	0.662226	-0.192533	-0.550375	0.0299587	0.580395	0.764412	-0.00807524	1.2929	-0.471438	2.455	0.0493071	-0.604383	0.0758977	1.15659	1.36152	0.919752	1.27277	0.824733	2.0598	1.11479	-0.504047	-0.254947	-0.216343	0.216119	-0.787151	1.63383	28		PLEKHG3..26030.	0.0387582	0.00567946	0.00905577	0.0145348	0.0185029	0.0450576	0.0822734	0.0145573	0.00194783	0.00744362	0.00180946	0.0198205	0.00273745
UID100	PLEKHG3..26030./59	59	59-SNNNSSSWLNVKGPLSPFNSRAAAGPAHHKL	26030	PLEKHG3	0.340962	-0.119071	1.10291	0.501769	0.538872	0.502971	0.866422	-0.200219	0.0722372	-0.0141358	0.578051	0.796931	0.352182	-0.00827662	1.15226	-0.386385	-0.142332	0.401373	0.997917	0.260895	0.600653	1.37368	0.465925	0.322615	-0.281998	0.782873	0.012808	1.42388	28		PLEKHG3..26030.	0.0387582	0.00567946	0.00905577	0.0145348	0.0185029	0.0450576	0.0822734	0.0145573	0.00194783	0.00744362	0.00180946	0.0198205	0.00273745
UID101	PLEKHG3..26030./60	60	60-SEIVKIWEGMESSGGSPGKGPGQGQANGFDL	26030	PLEKHG3	-0.0507772	-0.360398	0.229004	0.0933802	0.384932	0.133484	0.0617393	0.0422235	0.0944662	0.494492	-0.095209	0.511108	0.0423117	0.0944996	0.0200917	0.179705	-0.101174	0.092514	0.457044	-0.059106	0.475111	0.360274	-0.128471	0.187824	-0.265861	0.0241206	-0.160695	0.332575	28		PLEKHG3..26030.	0.0387582	0.00567946	0.00905577	0.0145348	0.0185029	0.0450576	0.0822734	0.0145573	0.00194783	0.00744362	0.00180946	0.0198205	0.00273745
UID105	PLEKHG3..26030./61	61	61-RESESSRSSRRPSGRSPTSTEKRMSFESISS	26030	PLEKHG3	-0.404396	-0.572928	4.25152	0.217054	0.935459	-0.983895	NA	NA	-0.831284	0.383521	NA	-2.45516	NA	1.23717	2.77471	-1.14553	NA	NA	NA	-1.9731	1.87559	0.280212	NA	0.782288	0.427502	1.41052	1.62256	-0.487113	20		PLEKHG3..26030.	0.0387582	0.00567946	0.00905577	0.0145348	0.0185029	0.0450576	0.0822734	0.0145573	0.00194783	0.00744362	0.00180946	0.0198205	0.00273745
UID108	PLEKHG3..26030./64	64	64-SATASPESSSPTEGRSPAHLARELKELVKEL	26030	PLEKHG3	0.953028	NA	NA	0.241152	-0.175842	0.894383	0.870032	0.038518	0.51807	NA	NA	1.27832	0.681759	0.0898895	0.377811	-0.0299053	NA	NA	NA	0.0503387	0.371696	2.01701	NA	-0.150315	0.100316	0.606543	0.293077	1.68169	20		PLEKHG3..26030.	0.0387582	0.00567946	0.00905577	0.0145348	0.0185029	0.0450576	0.0822734	0.0145573	0.00194783	0.00744362	0.00180946	0.0198205	0.00273745
UID109	PLEKHG3..26030./65	65	65-VSQRTTSPGGRPSARSPLSPTETFSWPDVRE	26030	PLEKHG3	0.579918	-0.208132	-0.37526	0.43275	-0.355558	-0.388595	0.134873	0.320923	0.147633	-0.548573	0.298526	0.349228	0.28354	0.147115	-0.100379	-0.190661	-0.416968	0.0670187	0.287248	-0.214091	0.647535	-0.743748	0.564756	0.270905	0.0394007	0.373041	0.393621	0.58193	28		PLEKHG3..26030.	0.0387582	0.00567946	0.00905577	0.0145348	0.0185029	0.0450576	0.0822734	0.0145573	0.00194783	0.00744362	0.00180946	0.0198205	0.00273745
UID110	PLEKHG3..26030./66	66	66-RTTSPGGRPSARSPLSPTETFSWPDVRELCS	26030	PLEKHG3	0.43141	-0.127918	0.118407	0.178742	0.00667858	-0.17895	0.451525	0.145296	0.0496621	0.179166	0.283638	0.84299	0.258003	0.26841	0.562283	0.128443	-0.120122	0.298472	0.141436	0.0530851	0.079946	-0.170439	0.504097	-0.164883	-0.0261893	0.282946	0.171468	0.511815	28		PLEKHG3..26030.	0.0387582	0.00567946	0.00905577	0.0145348	0.0185029	0.0450576	0.0822734	0.0145573	0.00194783	0.00744362	0.00180946	0.0198205	0.00273745
UID111	PLEKHG3..26030./67	67	67-RSSVAQEDSKSSGFGSPRLVSRSSSVLSLEG	26030	PLEKHG3	0.568461	-0.296775	0.584887	0.503156	-0.383462	0.209012	0.75014	0.264068	0.0391739	0.350348	0.299594	0.938268	0.637719	-0.219575	0.902401	-0.231096	-0.519418	0.00982841	0.867544	-0.0573347	0.762849	1.74822	-0.185876	0.22731	-0.330983	0.739987	0.142079	1.1842	28		PLEKHG3..26030.	0.0387582	0.00567946	0.00905577	0.0145348	0.0185029	0.0450576	0.0822734	0.0145573	0.00194783	0.00744362	0.00180946	0.0198205	0.00273745
UID112	PLEKHG3..26030./68	68	68-DSKSSGFGSPRLVSRSSSVLSLEGSEKGLAR	26030	PLEKHG3	-0.613862	-0.775166	-0.711623	-0.386511	-0.703952	-1.1875	NA	NA	0.153445	-0.998928	NA	-0.36228	NA	-0.624815	-0.709688	-0.503948	NA	NA	NA	-0.141103	-0.349653	-0.646498	NA	-0.647606	-1.1216	-0.465125	-0.473243	-0.605485	20		PLEKHG3..26030.	0.0387582	0.00567946	0.00905577	0.0145348	0.0185029	0.0450576	0.0822734	0.0145573	0.00194783	0.00744362	0.00180946	0.0198205	0.00273745
UID115	PLEKHG3..26030./69	69	69-GFGSPRLVSRSSSVLSLEGSEKGLARHGSAT	26030	PLEKHG3	0.533429	-0.175827	0.287094	0.223757	-0.0496325	0.10978	0.566597	-0.41419	0.11778	-0.436916	0.525199	0.335075	0.410189	0.0425873	0.609715	-0.395631	-0.365987	0.142085	0.183639	0.0745851	0.49678	0.587923	0.119933	0.0267042	0.082147	0.267143	0.169743	0.342696	28		PLEKHG3..26030.	0.0387582	0.00567946	0.00905577	0.0145348	0.0185029	0.0450576	0.0822734	0.0145573	0.00194783	0.00744362	0.00180946	0.0198205	0.00273745
UID116	PLEKHG3..26030./70	70	70-PRLVSRSSSVLSLEGSEKGLARHGSATDSLS	26030	PLEKHG3	NA	NA	0.630911	0.0790873	-0.114709	-0.0372837	0.0169735	0.04813	0.302989	NA	-0.0148196	0.578206	0.177229	NA	0.754985	0.530131	-0.273699	-0.109903	0.398748	0.208347	NA	1.50349	0.392331	0.102722	-0.0146122	0.547615	NA	0.808671	22		PLEKHG3..26030.	0.0387582	0.00567946	0.00905577	0.0145348	0.0185029	0.0450576	0.0822734	0.0145573	0.00194783	0.00744362	0.00180946	0.0198205	0.00273745
UID117	PLEKHG3..26030./71	71	71-QRFFFNPSAVSQRTTSPGGRPSARSPLSPTE	26030	PLEKHG3	0.879078	-0.246659	1.22	0.155362	0.669027	-1.7936	1.11924	-0.120771	0.0733542	-0.488714	0.903193	0.620506	0.732662	0.0655823	0.690238	-0.53915	-0.419835	-0.0595895	1.38312	0.255717	1.23814	-3.12334	0.180024	0.3867	-0.183661	0.712198	0.340772	1.35304	28		PLEKHG3..26030.	0.0387582	0.00567946	0.00905577	0.0145348	0.0185029	0.0450576	0.0822734	0.0145573	0.00194783	0.00744362	0.00180946	0.0198205	0.00273745
UID118	PLEKHG3..26030./72	72	72-AILEMDSYYPNRYRCSPERLKKAWSSQDEVS	26030	PLEKHG3	0.723761	0.0530311	0.825753	0.438769	-0.0620572	0.711691	0.51734	0.0436557	-0.254907	-0.423302	0.63609	1.08369	0.449767	0.0638018	1.42126	-0.603486	-0.481209	0.64471	1.0799	0.0962316	0.944877	1.40664	0.348263	0.462827	-0.192669	0.825127	0.266103	1.27457	28		PLEKHG3..26030.	0.0387582	0.00567946	0.00905577	0.0145348	0.0185029	0.0450576	0.0822734	0.0145573	0.00194783	0.00744362	0.00180946	0.0198205	0.00273745
UID119	SH3PXD2B..285590./73	73	73-KKNSGEPLPPKPGPGSPSHPGALDLDGVSRQ	285590	SH3PXD2B	-0.610018	-0.208772	-0.446672	-0.310791	0.502731	-0.325362	0.056839	-0.354003	-0.0292807	-0.16656	0.555882	-0.166737	-0.220579	0.182741	-0.0784636	1.38249	-0.539176	0.272606	-0.00445318	-0.352234	-0.66633	0.564534	-0.101458	-0.117592	-0.00070858	-0.0717506	-0.212597	NA	27		SH3PXD2B..285590.	0.0204078	0.0582437	0.0164052	0.0742259	0.00842749	0.0181106	0.0276585	0.00847419	0.0274337	0.0148305	0.00496349	0.0229883	0.0123028
UID120	CIBAR1..137392./74	74	74-PDYSSRLDIVRANSKSPLQRSLSAKCVSGTG	137392	CIBAR1	-3.05106	-3.17776	NA	-0.985117	0.739099	-1.68226	-3.14015	NA	-2.72495	NA	-3.05748	-3.15035	NA	NA	-2.60283	0.331646	-2.47093	NA	-2.63276	0.764071	NA	-1.84005	-0.074441	-2.77115	-1.92168	-1.90393	-2.16944	-2.9617	21		CIBAR1..137392.	0.0106568	0.010462	0.281075	0.0108702	0.0873962	0.195033	0.186684	0.121331	0.027962	0.00648177	0.0350104	0.0172746	0.0920876
UID121	ZBTB7C..201501./75	75	75-YSDTPRDFPDSFQAGSPGHLGVIRDFSIESL	201501	ZBTB7C	-0.285764	-0.370769	-0.522446	-0.20804	-0.577105	-1.04438	-0.617741	-0.12428	-0.822062	-0.177459	-0.431058	-0.151912	-0.185555	-0.0337858	0.371791	-0.480124	-0.520143	-0.978714	-0.0428243	-0.571012	0.286092	NA	-0.37912	0.660363	0.3361	-0.390921	0.164946	NA	26		ZBTB7C..201501.	0.0318211	0.0243839	0.00499495	0.043365	0.00762172	0.00162706	0.038587	0.0171051	0.0228707	0.037628	0.00920303	0.0454276	0.0198759
UID124	FRMD3..257019./77	77	77-PLPKEENISAPLISSSPVKAAREYEDPPSEE	257019	FRMD3	-0.0867586	-0.306765	-0.681068	0.0591249	0.477322	-0.0704069	0.523602	-0.723228	0.364611	0.410834	-0.399284	0.224517	1.68557	0.189692	-0.193565	0.826836	1.69601	2.20328	0.0745707	0.70795	NA	NA	-0.422219	-0.406159	-0.33718	2.73932	0.614793	0.257065	26		FRMD3..257019.	0.0271958	0.0299981	0.00911941	0.00622563	0.0160353	0.00947868	0.0171523	0.01253	0.0357421	0.00619931	0.0226033	0.0346848	0.00325919
UID125	FRMD3..257019./78	78	78-SSSPVKAAREYEDPPSEEEDKIKEEPLTISE	257019	FRMD3	-0.433337	0.0298581	-0.0594745	0.0283978	0.0727487	0.0742073	0.928384	-0.409464	0.537308	1.16445	-0.0784917	0.342203	1.486	-0.00766691	0.584445	-0.156274	1.36006	2.03836	0.332093	-0.258186	0.818415	1.08484	0.18234	-0.177944	-0.109941	2.89995	0.793282	0.398485	28		FRMD3..257019.	0.0271958	0.0299981	0.00911941	0.00622563	0.0160353	0.00947868	0.0171523	0.01253	0.0357421	0.00619931	0.0226033	0.0346848	0.00325919
UID126	FRMD3..257019./79	79	79-RRTMKMIHFRSSSVKSLSQEMRCTIRLLDDS	257019	FRMD3	-0.41364	-0.535634	-0.438632	-0.166192	-0.0842667	-0.242063	1.4455	-0.771306	0.274131	1.1398	-0.928198	0.366699	2.22485	-0.00591373	1.1757	0.371124	3.01401	3.20472	0.805516	-0.487706	1.63904	1.61201	0.0509729	-0.733512	-0.108356	3.48158	0.677531	0.0179005	28		FRMD3..257019.	0.0271958	0.0299981	0.00911941	0.00622563	0.0160353	0.00947868	0.0171523	0.01253	0.0357421	0.00619931	0.0226033	0.0346848	0.00325919
UID127	PTPDC1..138639./80	80	80-ECLQPLTHLKRRLSYSDSDLKRAENLLEQGE	138639	PTPDC1	-1.07899	-0.625927	0.68221	0.0718403	0.44368	-0.440172	0.251028	-0.127763	-0.57021	-1.16721	-0.191248	-0.659723	0.188239	-0.253698	-0.0268059	-0.0306396	0.58585	-0.413538	-0.419473	-0.170791	-0.634934	-0.610866	-0.428869	-0.885242	0.165562	0.401294	0.229552	-0.756393	28		PTPDC1..138639.	0.0826925	0.123988	0.021238	0.105909	0.037034	0.0805503	0.0474777	0.0348753	0.120175	0.0676271	0.023433	0.0859846	0.103093
UID129	BCLAF3..256643./81	81	81-NSLENVYMYKPHRGYSPGRGDSNRRAQYMPK	256643	BCLAF3	-0.521092	0.768814	0.584256	-0.947057	-0.150983	-0.0689832	-0.0467854	0.61309	0.692896	-0.240523	0.927009	-1.70322	1.13119	1.34238	0.958009	-1.38888	0.309028	-0.432964	-0.32455	-0.661614	1.40813	0.315866	0.385393	1.46761	1.18894	-0.21605	1.16671	-0.521266	28		BCLAF3..256643.	0.0675584	0.0259873	0.034214	0.0587249	0.0108871	0.0427896	0.0154296	0.0588393	0.0702482	0.0152483	0.0199522	0.0790298	0.00394434
UID131	BCLAF3..256643./82	82	82-ARSRSRSPRWKHRSLSPVPRNAEHYKQRHSH	256643	BCLAF3	-0.507694	0.1492	-0.528956	-0.848423	-0.363849	-0.213411	-0.0593615	0.44708	0.155511	1.01235	0.313756	-0.0933933	0.329721	0.372646	0.558018	-0.376354	-0.508613	-0.464577	-0.153337	-0.221237	0.312836	-0.0974474	-0.284214	0.126698	0.891148	-0.0999022	0.138067	-0.284294	28		BCLAF3..256643.	0.0675584	0.0259873	0.034214	0.0587249	0.0108871	0.0427896	0.0154296	0.0588393	0.0702482	0.0152483	0.0199522	0.0790298	0.00394434
UID132	BCLAF3..256643./83	83	83-SNQLDKSQKLPDVKPSPINLRKKSLTVKVDV	256643	BCLAF3	-0.602068	-0.0143292	-0.227834	-1.30063	-0.434004	-0.261342	-0.288317	0.137374	-0.244521	-0.191333	0.43471	0.325974	-0.318255	0.530491	-0.242778	0.0309989	0.347914	-0.0135137	0.209649	-0.76377	-0.2211	-0.189228	-0.24558	-0.0958945	0.0722586	-0.2644	-0.8719	0.0420284	28		BCLAF3..256643.	0.0675584	0.0259873	0.034214	0.0587249	0.0108871	0.0427896	0.0154296	0.0588393	0.0702482	0.0152483	0.0199522	0.0790298	0.00394434
UID133	BCLAF3..256643./84	84	84-QRIQEEKYSQSTRRGSEDFETRSSFQKRYPE	256643	BCLAF3	0.216698	-0.0333816	0.164658	-0.92822	-0.121394	-0.279429	0.343281	0.647262	0.616156	0.997296	1.59251	0.0771691	0.255666	0.321516	0.739668	0.0288992	0.523682	0.52187	0.375804	-0.34265	1.06817	0.153155	0.0347241	0.313964	0.175973	0.750472	0.572254	0.159632	28		BCLAF3..256643.	0.0675584	0.0259873	0.034214	0.0587249	0.0108871	0.0427896	0.0154296	0.0588393	0.0702482	0.0152483	0.0199522	0.0790298	0.00394434
UID135	ZNF320..162967./86	86	86-GEKPHKCGDCGKAFNSPSHLIRHQRIHTGQK	162967	ZNF320	-0.706949	-0.909697	-1.0288	-1.21066	-0.152225	0.269327	-0.0882219	-0.609224	-1.05839	0.462579	-0.356688	0.0386079	0.0860252	-0.749202	-0.515703	-1.19921	-0.653228	0.0263674	-1.034	0.424373	-1.1624	0.0236378	-0.158795	-1.25929	-0.429242	-0.264365	-0.497256	0.623654	28		ZNF320..162967.	0.11945	0.0290501	0.016759	0.0129902	0.0724116	0.0326098	0.0157395	0.0249398	0.0428167	0.0110286	0.0660915	0.0350015	0.0126332
UID136	NBAS..51594./87	87	87-IKTVKHFIEKPRKRNSEDEAQEAKDSKVTYA	51594	NBAS	0.460518	0.0454669	0.541414	-0.064768	0.515612	-0.581087	-0.0632257	0.240403	0.416134	0.744548	0.756611	-0.138627	0.846215	0.0906652	0.889325	-0.13521	0.463892	-0.16459	0.244134	0.468004	1.19848	0.21196	0.516678	0.652495	0.369556	0.125652	0.958587	-0.104148	28		NBAS..51594.	0.962466	0.226433	0.929775	0.853225	0.135834	0.916961	0.109508	0.923664	0.659678	0.609027	0.878353	0.582705	0.0606806
UID137	TARS3..123283./88	88	88-FIREEYHKRDFTEVLSPNMYNSKLWEASGHW	123283	TARS3	-0.242936	-0.263103	-0.106211	-0.436577	0.929386	NA	0.511387	-0.0778875	NA	0.517521	-0.463075	0.0967002	-0.191783	-0.39562	-0.0573654	-0.353713	0.672283	NA	-0.27527	0.149878	-0.427347	-0.0160022	-0.192496	0.507447	-0.106543	-0.339662	0.20446	NA	24		TARS3..123283.	0.0274747	0.0406956	0.0174484	0.0256805	0.0139049	0.0185323	0.00401304	0.00818547	0.0333847	0.0626261	0.0338794	0.126352	0.0260848
UID142	CCDC66..285331./90	90	90-EPLNIHSFSKERSPSSPVPVVKNRTQQTQNT	285331	CCDC66	NA	0.78253	-0.350639	0.620018	0.172433	-0.00699615	NA	NA	-0.304172	-0.679376	0.00455666	-0.978148	NA	NA	-0.13441	0.0422029	-0.439967	-0.553747	0.202333	-0.41365	NA	-0.313507	0.0128102	0.441607	-0.295794	-0.384907	NA	0.0359735	21		CCDC66..285331.	0.0298566	0.00903044	0.362217	0.0590966	0.0673439	0.051761	0.0604821	0.0506214	0.0394199	0.0285545	0.0911551	0.0164036	0.0263644
UID143	DENND3..22898./91	91	91-RNSSLRLTDTAGCRGSSAVLNVTPKSPYTFK	22898	DENND3	0.47052	-0.819453	NA	NA	NA	NA	-0.181568	NA	NA	NA	-0.423925	1.4944	NA	NA	-0.397456	1.14337	0.609032	NA	-0.141082	0.210336	NA	NA	-0.580545	NA	-0.506743	-0.00132275	-0.748371	NA	14		DENND3..22898.	0.011825	0.0620301	0.051519	0.0243584	0.00962406	0.0106483	0.0572949	0.105765	0.130535	0.017694	0.0180778	0.102302	0.0248067
UID144	DENND3..22898./92	92	92-RKSSHLHVTHRRMVVSMPNLQDIAMPELAPR	22898	DENND3	0.319927	0.575285	NA	NA	NA	NA	0.0480776	NA	NA	NA	-0.0514975	1.01337	NA	NA	-0.0439491	0.162229	-0.116306	NA	0.449789	0.291107	NA	NA	-0.338871	NA	-0.430032	-0.115296	0.084507	NA	14		DENND3..22898.	0.011825	0.0620301	0.051519	0.0243584	0.00962406	0.0106483	0.0572949	0.105765	0.130535	0.017694	0.0180778	0.102302	0.0248067
UID149	SBNO1..55206./93	93	93-IRKDHKKNKEKKKKKSIDPDSIQSALLASGL	55206	SBNO1	0.233456	-0.0151057	-0.222553	-0.341621	-0.717307	0.138086	-0.0175214	0.212553	0.310615	-0.29375	-0.13156	0.0868244	-0.472528	-0.811252	-0.41886	-0.101195	0.64403	0.114799	0.189487	0.683917	0.118366	-0.367483	0.0684211	0.35623	-0.283913	0.0598845	-0.0873473	-0.0859203	28		SBNO1..55206.	0.994948	0.990219	0.993074	0.998505	0.999995	1	0.963467	0.998865	0.997133	0.978947	0.991661	1	0.969904
UID151	SBNO1..55206./95	95	95-RKKLYSLLGIDLTAPSNNSSPRDSPCKENKI	55206	SBNO1	-0.00184154	0.0607171	0.231282	NA	-0.0336237	NA	NA	NA	NA	0.205363	0.355442	NA	NA	-0.478286	0.0324068	0.000464439	0.238977	-0.102277	0.0859518	NA	-0.642529	-0.0753169	0.0303292	NA	NA	-0.346188	-0.329324	NA	17		SBNO1..55206.	0.994948	0.990219	0.993074	0.998505	0.999995	1	0.963467	0.998865	0.997133	0.978947	0.991661	1	0.969904
UID152	SBNO1..55206./96	96	96-LYSLLGIDLTAPSNNSSPRDSPCKENKIKKR	55206	SBNO1	-0.0916128	-0.256655	0.214555	-0.323809	NA	0.0905969	0.0698996	0.147761	-0.098963	-0.0319223	0.0407894	0.237063	0.146203	0.019043	-0.102291	0.0604563	-0.0320055	-0.0923417	-0.0692902	-0.0774083	NA	NA	0.0244122	0.290704	-0.390121	-0.0327473	-0.0913954	0.181545	25		SBNO1..55206.	0.994948	0.990219	0.993074	0.998505	0.999995	1	0.963467	0.998865	0.997133	0.978947	0.991661	1	0.969904
UID153	SBNO1..55206./97	97	97-YSLLGIDLTAPSNNSSPRDSPCKENKIKKRK	55206	SBNO1	0.52642	NA	NA	-0.000535727	-0.14194	0.187698	0.532619	0.00656033	-0.0823526	NA	NA	0.0285416	0.245107	0.142779	-0.383444	-0.472639	NA	NA	NA	0.354847	0.945227	0.0364771	NA	0.216821	0.0583663	0.0555592	0.31033	-0.217566	20		SBNO1..55206.	0.994948	0.990219	0.993074	0.998505	0.999995	1	0.963467	0.998865	0.997133	0.978947	0.991661	1	0.969904
UID154	SBNO1..55206./98	98	98-GIDLTAPSNNSSPRDSPCKENKIKKRKGEEI	55206	SBNO1	0.308351	0.443878	-0.192231	-0.0866847	-0.299627	0.216684	-0.00436354	-0.0579915	-0.143014	-0.556282	-0.166664	-0.123632	-0.160157	-0.389764	-0.317407	0.0192776	0.154976	-0.242597	0.118428	0.144987	-0.182378	NA	0.31922	0.0921192	-0.0163422	-0.00260544	0.00153637	NA	26		SBNO1..55206.	0.994948	0.990219	0.993074	0.998505	0.999995	1	0.963467	0.998865	0.997133	0.978947	0.991661	1	0.969904
UID155	SBNO1..55206./99	99	99-IQSALLASGLGSKRPSFSSTPVISPAPNSTP	55206	SBNO1	0.472251	0.445731	0.705511	0.107379	-0.080787	0.748281	0.606455	0.0220474	0.457568	0.156735	0.602331	0.303175	-0.141282	-0.206643	-0.0623681	0.0378768	1.01199	0.357329	0.121655	0.778806	0.627087	0.019235	0.0242569	0.589579	0.482946	0.362617	0.586789	0.535673	28		SBNO1..55206.	0.994948	0.990219	0.993074	0.998505	0.999995	1	0.963467	0.998865	0.997133	0.978947	0.991661	1	0.969904
UID159	SBNO1..55206./101	101	101-RVVSNDDGSISYESRSELDVPVEILNITEKQ	55206	SBNO1	0.134488	0.147694	0.414772	0.157551	-0.491076	NA	0.233552	0.386025	NA	0.659717	-0.022891	0.0394735	0.285248	-0.0402718	-0.191691	-0.126844	0.555073	-0.368514	0.0688906	0.342738	0.218063	NA	0.0179782	0.0960531	0.344185	0.0594568	0.118802	NA	24		SBNO1..55206.	0.994948	0.990219	0.993074	0.998505	0.999995	1	0.963467	0.998865	0.997133	0.978947	0.991661	1	0.969904
UID161	SBNO1..55206./103	103	103-EGARMWINDMKMRSFSPTMKVPVVKEDDEPE	55206	SBNO1	0.335279	-0.147951	0.327421	-0.177569	-0.591894	-0.0836717	0.527895	0.0347853	0.216068	-0.294369	0.221337	-0.673865	-0.242197	-0.654806	0.192009	-0.557583	0.0473027	0.0548933	-0.193689	0.18687	-0.106761	-0.284113	0.510465	0.371738	0.241947	-0.205451	0.0245954	-0.185316	28		SBNO1..55206.	0.994948	0.990219	0.993074	0.998505	0.999995	1	0.963467	0.998865	0.997133	0.978947	0.991661	1	0.969904
UID162	SBNO1..55206./104	104	104-EIVMKSIVNLDSPMVSPPPDYPGEFFKDVRQ	55206	SBNO1	-0.704271	-0.300374	0.363234	-0.130766	0.0986427	-0.357274	0.295976	-0.173903	-0.0862427	0.501289	-0.302819	-0.337654	-0.397466	-0.433451	-0.0137286	-0.0524955	-0.00218677	-0.420169	0.159233	0.989837	-0.318916	-0.424032	-0.296057	0.140447	-0.0466328	-0.349631	-0.186259	-0.0759072	28		SBNO1..55206.	0.994948	0.990219	0.993074	0.998505	0.999995	1	0.963467	0.998865	0.997133	0.978947	0.991661	1	0.969904
UID165	GSAP..54103./106	106	106-HYNNSVVRREWHNLISEEKTGKRRSAAYVRN	54103	GSAP	-0.375659	-0.201884	NA	NA	NA	NA	0.377982	NA	NA	NA	-0.0152826	-0.106297	NA	NA	-0.348077	-0.00944424	0.0777597	NA	-0.214149	0.0257277	NA	NA	-0.401059	NA	-0.0834541	0.00397492	-0.323471	NA	14		GSAP..54103.	0.0599692	0.169175	0.00910109	0.061707	0.09207	0.058921	0.0499738	0.018239	0.240673	0.121992	0.00681274	0.0407696	0.0756852
UID168	KLRG2..346689./109	109	109-SPRPSTRFLKVPVPESPAFSRHADPAHQLLL	346689	KLRG2	-0.117552	-0.111362	-0.626414	3.71715	-0.234844	0.0905585	0.0428505	0.0438733	-0.151251	0.117594	0.247548	1.09967	0.0375073	0.0226603	-0.0733833	0.270561	0.0394917	-0.0130656	0.0380402	-0.11043	0.408489	0.00627518	-0.18282	-0.0701005	-0.0954452	1.53007	0.169563	-0.0728229	28		KLRG2..346689.	0.0364473	0.0156491	0.0222131	0.127769	0.0513189	0.0207097	0.014998	0.0302907	0.0200448	0.008531	0.0961372	0.00896391	0.0104068
UID171	KLRG2..346689./111	111	111-VPPLSLGYGVCPEPPSPGPALVKLPRNGEAP	346689	KLRG2	1.18412	0.689503	-0.364153	2.08504	-0.0641359	-0.0392017	NA	0.160499	0.0534627	-0.111368	-0.284844	0.304848	-0.169738	0.0166039	-0.273849	-0.395156	-0.492042	-0.526726	-0.318489	-0.25792	-0.630487	-0.269629	0.205436	-0.270331	-0.0160151	1.87496	-0.141626	-0.031916	27		KLRG2..346689.	0.0364473	0.0156491	0.0222131	0.127769	0.0513189	0.0207097	0.014998	0.0302907	0.0200448	0.008531	0.0961372	0.00896391	0.0104068
UID193	BDP1..55814./125	125	125-SSRSSSTVSQRRKRISSTSSLVKSSVSVPSE	55814	BDP1	0.70399	-0.106419	NA	-0.416167	NA	NA	0.749103	0.318775	NA	NA	-0.0621548	0.446377	-0.0502086	0.29427	-0.0826244	0.0670404	0.82832	NA	0.0417404	0.949436	0.459798	NA	-0.328918	0.44968	0.149069	-0.0179863	0.0397263	NA	20		BDP1..55814.	0.907847	0.911189	0.846321	0.952158	0.947935	0.996173	0.883887	0.933793	0.916027	0.975702	0.951052	0.995877	0.90356
UID195	BDP1..55814./127	127	127-EEAVILPCTQTERNLSPSNSCEPKEESQSAP	55814	BDP1	0.0273333	-0.143008	NA	NA	NA	NA	1.09476	NA	NA	NA	-0.565511	0.0868349	NA	NA	0.115456	0.0766239	0.23189	NA	-0.228279	0.0444045	NA	NA	-0.235007	NA	0.00262737	-0.0190763	-0.161115	NA	14		BDP1..55814.	0.907847	0.911189	0.846321	0.952158	0.947935	0.996173	0.883887	0.933793	0.916027	0.975702	0.951052	0.995877	0.90356
UID199	FAM83G..644815./131	131	131-____________MAFSQVQCLDDNHVNWRSS	644815	FAM83G	-0.106074	-0.532796	0.246898	0.237741	-0.0338294	0.257272	-0.0471907	0.0635567	0.0345683	0.0809223	0.255492	-0.075841	0.0665468	0.0933177	0.126444	0.0630713	-0.167815	-0.0724111	-5.75384e-05	0.239789	0.0264448	-0.0873432	0.0391568	0.0507758	0.0893968	-0.197521	-0.000890891	-0.0761919	28		FAM83G..644815.	0.209034	0.0168624	0.101196	0.0467736	0.0203764	0.0479953	0.0789225	0.0513351	0.041989	0.0167149	0.0586999	0.020546	0.00603606
UID200	FAM83G..644815./132	132	132-AKKLVNPKYALVKAKSVDEIAKISSEKQEAK	644815	FAM83G	0.321023	-0.434209	-0.0626945	0.960257	0.368745	0.488498	0.453043	0.507766	0.661769	-0.0306032	0.62942	0.228522	0.557952	0.654961	0.644816	0.140601	-1.40609	0.134979	0.264364	0.0858912	0.219084	0.931372	0.321373	0.819679	0.234166	-0.171229	0.843479	0.642962	28		FAM83G..644815.	0.209034	0.0168624	0.101196	0.0467736	0.0203764	0.0479953	0.0789225	0.0513351	0.041989	0.0167149	0.0586999	0.020546	0.00603606
UID203	FAM83G..644815./135	135	135-QAKGGQVPRLLPDPGSPRLAQNARPMTDGRA	644815	FAM83G	-0.216176	-0.301123	0.0134087	1.02817	0.278133	-0.351859	-0.367424	-0.257412	0.376677	-0.579374	-0.0886586	-0.632401	0.304336	0.167238	-0.164023	0.667595	-1.33296	-0.474919	-0.157657	0.973309	-0.262589	0.342141	-0.00820136	1.15357	-0.445899	-0.149273	0.260628	0.178936	28		FAM83G..644815.	0.209034	0.0168624	0.101196	0.0467736	0.0203764	0.0479953	0.0789225	0.0513351	0.041989	0.0167149	0.0586999	0.020546	0.00603606
UID204	FAM83G..644815./136	136	136-EQVANGPTPPPRRQLSAPHITRGTFVGPQGG	644815	FAM83G	0.452494	0.342373	0.0950189	0.726564	0.570233	-0.00562859	0.116085	0.0582595	0.347546	0.81563	0.154945	0.221536	0.386289	-0.013992	0.878801	0.0879936	-0.285656	0.0847137	0.0328417	0.251101	0.805975	0.882288	0.362766	0.228898	0.407139	0.259328	0.796466	0.254333	28		FAM83G..644815.	0.209034	0.0168624	0.101196	0.0467736	0.0203764	0.0479953	0.0789225	0.0513351	0.041989	0.0167149	0.0586999	0.020546	0.00603606
UID207	FAM83G..644815./138	138	138-SSGRGPGPRRPSVASSVSEEYFEVREHSVPL	644815	FAM83G	-0.539456	0.130823	-0.207825	0.667842	0.25803	0.322592	0.0232185	-0.408876	-0.193105	-0.287854	-0.00966374	-0.90253	0.170595	0.276567	0.11065	0.204351	-0.686144	-0.303836	-0.157884	-0.0678799	-0.985752	NA	0.179062	0.453383	0.116231	0.123957	-0.235229	-0.00334072	27		FAM83G..644815.	0.209034	0.0168624	0.101196	0.0467736	0.0203764	0.0479953	0.0789225	0.0513351	0.041989	0.0167149	0.0586999	0.020546	0.00603606
UID209	FAM83G..644815./140	140	140-KDGFPGPPRYRSAADSVQSSTRNAGPAMAGP	644815	FAM83G	NA	NA	1.24271	1.49736	0.97165	0.919943	1.2245	-0.385165	-0.179279	NA	0.258802	0.592909	1.04106	NA	0.386889	1.00881	-1.05364	-0.113221	1.02122	0.365149	NA	1.8441	0.169688	1.17212	1.22115	0.647721	NA	0.652846	22		FAM83G..644815.	0.209034	0.0168624	0.101196	0.0467736	0.0203764	0.0479953	0.0789225	0.0513351	0.041989	0.0167149	0.0586999	0.020546	0.00603606
UID210	FAM83G..644815./141	141	141-EPLPSLEYWPQKSDRSIPQLDLGWPDTIAYR	644815	FAM83G	-0.175001	-0.811928	0.148188	0.995107	0.24693	0.298432	0.637341	0.293425	0.47266	0.264459	0.0464622	0.151264	0.277989	0.668754	0.213873	0.397705	-1.13962	-0.216973	0.0324519	0.33463	0.100177	0.29127	-0.02713	0.669288	-0.0793908	-0.0413564	0.341804	0.430754	28		FAM83G..644815.	0.209034	0.0168624	0.101196	0.0467736	0.0203764	0.0479953	0.0789225	0.0513351	0.041989	0.0167149	0.0586999	0.020546	0.00603606
UID211	PALM3..342979./142	142	142-VEAGSVGQTDLNKRASLPAGLVGTPPESPSE	342979	PALM3	1.77209	-0.224842	-0.136601	0.017467	0.0720027	-0.0525333	-0.0513798	-0.327774	0.145119	0.129686	-0.146382	0.124629	-0.267255	0.160474	0.200242	0.0696672	-0.288528	0.148969	-0.167889	0.0775787	0.045131	0.467987	1.28895	-2.22524e-06	-0.163631	0.540786	-0.198884	0.312352	28		PALM3..342979.	0.0747816	0.176698	0.0757425	0.14463	0.0699933	0.0373532	0.0714916	0.106884	0.0100499	0.277829	0.0153364	0.0475243	0.0545037
UID212	PALM3..342979./143	143	143-KRASLPAGLVGTPPESPSEPREDVLGFLPGP	342979	PALM3	0.818593	-0.131679	-0.393072	-0.293032	-0.263107	NA	0.157789	0.375255	NA	-0.331278	-0.132723	-0.105508	-0.00587225	-0.249192	-0.199	0.0939589	0.155121	NA	0.212087	-0.0370624	-0.19865	-0.145829	0.617848	0.0323009	-0.0413923	0.116057	-0.316639	NA	24		PALM3..342979.	0.0747816	0.176698	0.0757425	0.14463	0.0699933	0.0373532	0.0714916	0.106884	0.0100499	0.277829	0.0153364	0.0475243	0.0545037
UID213	PALM3..342979./144	144	144-GSEEKPGTGRDEAEMSPVVERKGGEKKLELE	342979	PALM3	0.184615	-0.389473	-0.129134	NA	0.352827	NA	-0.343113	NA	NA	-0.56451	-0.345526	0.0165539	NA	NA	-0.175705	-0.231293	-0.0663114	0.266817	-0.447368	0.0291572	NA	NA	1.05308	NA	-0.126752	1.33734	0.0510769	NA	18		PALM3..342979.	0.0747816	0.176698	0.0757425	0.14463	0.0699933	0.0373532	0.0714916	0.106884	0.0100499	0.277829	0.0153364	0.0475243	0.0545037
UID214	PALM3..342979./145	145	145-GLEGPEVAGRERGDESPLGAEGAKTGGGEET	342979	PALM3	3.46159	-1.02519	-0.153557	-0.427512	0.321726	-0.511576	-0.614574	-0.695488	1.11996	-1.13617	-0.861233	0.173755	-0.594209	0.383983	-0.655578	-0.209917	-0.287054	0.0513768	-0.522835	0.474231	-0.238475	0.923501	2.72323	0.388295	-0.56524	2.09615	-0.706006	0.388774	28		PALM3..342979.	0.0747816	0.176698	0.0757425	0.14463	0.0699933	0.0373532	0.0714916	0.106884	0.0100499	0.277829	0.0153364	0.0475243	0.0545037
UID215	PALM3..342979./146	146	146-EEVVLEAIGDRKGAGSLELPAWVKEDRGIVE	342979	PALM3	2.29473	-0.24821	0.0848255	-0.159003	0.00939465	-0.186805	-0.261388	-0.517819	0.989445	0.718292	0.01771	0.551255	-0.249456	0.266899	-0.246171	0.506109	-0.0675924	0.42013	-0.0719619	0.344656	0.265225	0.418701	2.36034	0.133312	-0.118269	1.06163	-0.0223616	0.421605	28		PALM3..342979.	0.0747816	0.176698	0.0757425	0.14463	0.0699933	0.0373532	0.0714916	0.106884	0.0100499	0.277829	0.0153364	0.0475243	0.0545037
UID216	PALM3..342979./147	147	147-EAMGEIGRVPEVVQTSSPRLQERLEAAASIE	342979	PALM3	1.74503	-0.233063	0.014349	-0.0228851	0.298475	0.342121	-0.0599093	-0.278487	0.458211	0.240787	0.0062952	0.488486	-0.0937552	0.598938	0.106083	0.0986614	0.402512	-0.00432491	0.193789	0.516872	-0.0196218	0.622589	1.18889	0.218172	-0.00413831	0.828706	-0.0790005	0.18829	28		PALM3..342979.	0.0747816	0.176698	0.0757425	0.14463	0.0699933	0.0373532	0.0714916	0.106884	0.0100499	0.277829	0.0153364	0.0475243	0.0545037
UID217	PALM3..342979./148	148	148-AMGEIGRVPEVVQTSSPRLQERLEAAASIEG	342979	PALM3	1.39834	-0.316769	-0.744614	-0.27707	0.227804	-0.361125	0.00181293	-0.471002	0.267428	-0.0456872	-0.218631	-0.0978489	-0.402689	-0.0225407	-0.327817	0.0297489	0.769421	-0.020757	0.0790544	-0.000940562	-0.78546	-0.284667	0.94612	-0.430055	-0.184689	0.609098	-0.70386	0.181702	28		PALM3..342979.	0.0747816	0.176698	0.0757425	0.14463	0.0699933	0.0373532	0.0714916	0.106884	0.0100499	0.277829	0.0153364	0.0475243	0.0545037
UID219	PALM3..342979./149	149	149-PGAAGDSSEANGPCPSPIPTPEQGLSQRAVP	342979	PALM3	1.3586	-0.164978	0.295018	0.0810373	0.0951176	0.108322	0.0801992	-0.106221	0.279245	-0.0510771	-0.056486	-0.0645761	0.0440784	-0.0487127	-0.0237652	-0.223462	-0.1591	-0.105305	-0.135777	0.0350006	0.00519943	-0.137116	0.892205	-0.0165415	0.0704606	0.580826	-0.0982499	0.0377951	28		PALM3..342979.	0.0747816	0.176698	0.0757425	0.14463	0.0699933	0.0373532	0.0714916	0.106884	0.0100499	0.277829	0.0153364	0.0475243	0.0545037
UID220	PALM3..342979./150	150	150-GGEETLEAEKRGGEESLETEKTQGTEGDLNL	342979	PALM3	2.33733	-0.226765	NA	NA	NA	NA	-0.217011	NA	NA	NA	-0.244295	0.285584	NA	NA	-0.611287	0.226093	-0.0597496	NA	0.0563383	-0.146309	NA	NA	1.07964	NA	-0.434456	0.0931034	-0.317914	NA	14		PALM3..342979.	0.0747816	0.176698	0.0757425	0.14463	0.0699933	0.0373532	0.0714916	0.106884	0.0100499	0.277829	0.0153364	0.0475243	0.0545037
UID221	PALM3..342979./151	151	151-EKTQGTEGDLNLEQGSREGSESQAEEMNEAG	342979	PALM3	1.23896	0.00454259	0.45354	0.0155494	-0.428697	-0.432451	0.192656	-0.136106	-0.116923	-0.160934	0.139709	-0.194915	0.0352902	0.0909386	-0.220066	-0.0230007	0.321163	NA	0.21674	0.0636776	0.216326	0.0234235	1.21883	-0.126909	-0.269195	0.512186	0.0014863	-0.415831	27		PALM3..342979.	0.0747816	0.176698	0.0757425	0.14463	0.0699933	0.0373532	0.0714916	0.106884	0.0100499	0.277829	0.0153364	0.0475243	0.0545037
UID223	PGP..283871./152	152	152-ALRARGKRLGFITNNSSKTRAAYAEKLRRLG	283871	PGP	0.197929	-0.00334501	NA	NA	NA	NA	-0.195189	NA	NA	NA	-0.0791731	-0.451053	NA	NA	-0.477164	-0.120833	-0.138665	NA	-0.270733	-0.121515	NA	NA	-0.548345	NA	-0.493698	-0.0789776	-0.333467	NA	14		PGP..283871.	0.041871	0.128552	0.166012	0.278206	0.409675	0.37507	0.361238	0.0926326	0.08219	0.0318648	0.0609644	0.0225314	0.0145181
UID225	SOWAHB..345079./154	154	154-RPPRSRKPSKAGTAPSPRVDAGLSLKLAEVK	345079	SOWAHB	0.272674	1.25354	NA	2.01976	-0.0696173	0.623933	-0.0460796	0.65525	1.51685	-0.333788	0.542865	-0.183483	0.763872	1.25311	1.13682	-1.76992	-0.965117	-0.44252	-0.643517	-2.06297	NA	0.783007	0.281599	0.320109	-1.21603	1.06369	0.867362	0.738262	26		SOWAHB..345079.	0.0199062	0.31433	0.00866525	0.0429327	0.0616595	0.0578155	0.0138233	0.0483942	0.0769749	0.0810868	0.0276618	0.071472	0.0629515
UID226	SOWAHB..345079./155	155	155-AHSPPATVEAATSRASPPALLPGPAPRGDRP	345079	SOWAHB	0.19687	0.386959	-0.109414	0.394333	-0.0717999	0.131632	0.275266	0.46665	0.27991	-0.0105987	-0.0484093	0.16621	0.515439	-0.180133	1.05619	-0.858943	-0.91617	-0.201036	-0.582074	-0.646311	-0.189037	0.280314	-0.373948	-0.0731907	-0.894804	0.555254	0.42622	0.217774	28		SOWAHB..345079.	0.0199062	0.31433	0.00866525	0.0429327	0.0616595	0.0578155	0.0138233	0.0483942	0.0769749	0.0810868	0.0276618	0.071472	0.0629515
UID229	SOWAHB..345079./157	157	157-EPPAAAPSAGGAAPCSPRGARRGEPPQQQPR	345079	SOWAHB	-0.0649803	0.171255	-0.0227814	0.499142	-0.416157	-0.0211806	-0.18245	0.390814	0.29179	-0.119031	-0.0867546	0.083724	0.323151	-0.185898	0.533499	-0.552959	-0.220091	-0.187406	-0.413684	-1.19529	-0.122017	-0.212049	-0.164703	0.0749165	-0.684916	0.0566049	0.210533	-0.154028	28		SOWAHB..345079.	0.0199062	0.31433	0.00866525	0.0429327	0.0616595	0.0578155	0.0138233	0.0483942	0.0769749	0.0810868	0.0276618	0.071472	0.0629515
UID230	SOWAHB..345079./158	158	158-EGALAEPAPVPAVAHSPPATVEAATSRASPP	345079	SOWAHB	0.136849	0.311943	0.538946	-0.0165491	-0.370135	-0.350277	0.374894	0.570382	0.183817	0.351335	0.282098	-0.0638709	0.42272	-0.0518856	0.633516	-0.554907	0.0794461	0.693123	-0.164386	-0.720762	NA	-0.179787	0.218933	0.0674105	-0.335636	0.188326	0.31593	-0.259085	27		SOWAHB..345079.	0.0199062	0.31433	0.00866525	0.0429327	0.0616595	0.0578155	0.0138233	0.0483942	0.0769749	0.0810868	0.0276618	0.071472	0.0629515
UID231	SOWAHB..345079./159	159	159-SDSRRAPGKGGGSKGSPGQRPPVPAAAAAGA	345079	SOWAHB	-0.262672	NA	0.117743	0.458412	NA	0.423737	0.0764704	0.267367	0.507801	NA	0.375237	-0.497965	0.426861	-0.18087	NA	NA	-0.374752	-0.401846	-0.0577888	0.00189591	-0.150278	NA	-0.458493	0.0639896	0.443122	NA	-0.378041	NA	20		SOWAHB..345079.	0.0199062	0.31433	0.00866525	0.0429327	0.0616595	0.0578155	0.0138233	0.0483942	0.0769749	0.0810868	0.0276618	0.071472	0.0629515
UID233	SOWAHB..345079./160	160	160-PRGKPIFPVYPLVGSSSPTRKAKSKEISRSV	345079	SOWAHB	-0.400411	-0.122634	0.266739	0.62366	-0.403753	-0.089922	-0.00410366	0.646455	0.370878	-0.0240257	0.528297	0.369616	0.352015	-0.129608	0.781221	-0.786053	-1.2245	-0.451453	-0.79878	-0.831709	NA	NA	-0.383363	-0.211596	-0.475879	0.332959	0.209229	0.214428	26		SOWAHB..345079.	0.0199062	0.31433	0.00866525	0.0429327	0.0616595	0.0578155	0.0138233	0.0483942	0.0769749	0.0810868	0.0276618	0.071472	0.0629515
UID234	SOWAHB..345079./161	161	161-RGKPIFPVYPLVGSSSPTRKAKSKEISRSVT	345079	SOWAHB	0.144825	0.0119885	-0.150643	0.760532	-0.454973	-0.425546	0.347232	0.605309	0.539326	0.0535337	0.256448	-0.231179	0.571473	-0.308889	1.13522	-1.81495	-1.7924	-0.391506	-0.917087	-1.54114	-0.270543	0.075209	-0.27319	-0.32848	-1.26275	0.445998	0.554103	-0.30368	28		SOWAHB..345079.	0.0199062	0.31433	0.00866525	0.0429327	0.0616595	0.0578155	0.0138233	0.0483942	0.0769749	0.0810868	0.0276618	0.071472	0.0629515
UID235	SOWAHB..345079./162	162	162-KAKSKEISRSVTRKTSFAALLKSQHNKWKLA	345079	SOWAHB	0.53481	NA	-1.16822	-0.754094	-1.0471	0.38825	0.499696	1.14274	-0.468523	1.56442	-0.479643	0.372988	0.720258	-0.945801	0.134357	-1.61253	-1.23418	-0.495281	-0.691731	-1.38452	0.186911	0.0348701	-0.736885	-0.691316	-1.14579	-0.0796614	-0.118028	-0.0455284	27		SOWAHB..345079.	0.0199062	0.31433	0.00866525	0.0429327	0.0616595	0.0578155	0.0138233	0.0483942	0.0769749	0.0810868	0.0276618	0.071472	0.0629515
UID240	WIPF3..644150./167	167	167-RLPNKTISGPLIPPASPRLGNTSEAHGAART	644150	WIPF3	-0.156113	-0.864612	-0.992336	-0.288959	-0.0388056	-0.169594	-0.149723	-0.382186	-0.402497	0.494273	-0.581426	0.0906038	-0.499864	0.0456357	-0.405658	0.24866	-0.602805	-0.31638	-0.155269	0.74476	-0.639244	-0.394973	-0.490989	-0.283729	-0.592731	-0.341027	-0.708042	0.23812	28		WIPF3..644150.	0.0248297	0.00810301	0.010245	0.0116707	0.0296539	0.0238528	0.0241184	0.0274803	0.0516802	0.0238412	0.0129427	0.0359794	0.0468277
UID242	TVP23A..780776./168	168	168-LVGLRWWNQIDEDGKSHWIFEARKVSPNSIA	780776	TVP23A	-0.132226	0.490793	0.921412	-0.111365	1.45658	NA	-0.465954	-0.300839	NA	0.366083	NA	-0.300817	-0.216884	0.061902	NA	NA	NA	NA	NA	-0.540321	0.171478	0.0914359	NA	-0.235357	-0.282142	NA	-0.345332	NA	17		TVP23A..780776.	0.021052	0.0473734	0.0108563	0.114439	0.0450996	0.0426023	0.00724803	0.0181677	0.0544862	0.0654521	0.0296523	0.0858226	0.0750994
UID246	SMCHD1..23347./169	169	169-LGMTPIRKCNDSLRHSPKVETTDCPVPPKRM	23347	SMCHD1	0.0761778	-1.15293	-0.136158	0.113893	-0.254226	0.905081	-0.010807	0.00363064	-0.208064	0.311245	NA	-0.262773	0.626206	-0.0547997	NA	NA	NA	-0.471824	NA	-0.29597	0.431968	-0.708903	NA	0.0855746	-0.305871	NA	-0.433679	-0.0226603	21		SMCHD1..23347.	0.0917	0.0935	0.00587	0.0369	0.0611	0.0671	0.0552	0.051	0.042	0.0242	0.00289	0.0222	0.0785
UID253	WTIP..126374./173	173	173-YADFLPPGACPAPARSPEPAGPAPFPLPALP	126374	WTIP	0.443602	0.0423918	-0.405718	-0.286012	0.220051	-0.398746	-0.721642	-0.0646472	-0.766702	-0.207922	-0.454106	0.802376	-0.148767	-0.680768	-0.588562	0.760514	-0.227131	-0.0876987	-0.433335	-0.706388	-0.300277	-0.850691	-0.376198	-0.491721	-0.870244	-0.678527	-0.617756	-0.0889063	28		WTIP..126374.	0.0800334	0.00503226	0.054102	0.0766216	0.0421426	0.0312065	0.0435275	0.0690234	0.000373812	0.0143026	0.00661137	0.00581873	0.0547225
UID256	CCDC85C..317762./175	175	175-TRRSLDDLSAPPHHRSIPNGLHDPSSTYIRQ	317762	CCDC85C	-0.504195	0.176473	0.298495	-0.430071	0.0269008	-0.30999	-0.73859	-0.350126	-0.282381	0.413888	-0.562773	-0.0336971	-0.323043	-0.443302	-0.232615	-0.334024	-0.0745382	-0.227145	-0.267279	-0.701588	0.0411822	0.0645423	0.000389576	0.162415	-0.583489	0.00356293	-0.412615	-0.108799	28		CCDC85C..317762.	0.00296678	0.0321367	0.00302222	0.00451307	0.00485798	0.0190093	0.010794	0.00329397	0.0220955	0.00870482	0.0225935	0.0200391	0.00655001
UID258	CCDC85C..317762./176	176	176-AASGGGGGGGGAGSRSSIDSQASLSGPLSGG	317762	CCDC85C	NA	NA	NA	-0.119325	0.136254	0.0553703	NA	-0.00258541	0.299447	0.231853	NA	0.29274	0.234693	0.50579	0.321335	-0.0788097	NA	0.342212	NA	-0.0466375	NA	0.466269	NA	0.532603	0.108183	0.477323	NA	0.277504	18		CCDC85C..317762.	0.00296678	0.0321367	0.00302222	0.00451307	0.00485798	0.0190093	0.010794	0.00329397	0.0220955	0.00870482	0.0225935	0.0200391	0.00655001
UID259	CCDC85C..317762./177	177	177-ASGGGGGGGGAGSRSSIDSQASLSGPLSGGA	317762	CCDC85C	NA	NA	NA	-0.119325	0.136254	0.0553703	NA	-0.00258541	0.299447	0.231853	NA	0.29274	0.234693	0.50579	0.321335	-0.0788097	NA	0.342212	NA	-0.0466375	NA	0.466269	NA	0.532603	0.108183	0.477323	NA	0.277504	18		CCDC85C..317762.	0.00296678	0.0321367	0.00302222	0.00451307	0.00485798	0.0190093	0.010794	0.00329397	0.0220955	0.00870482	0.0225935	0.0200391	0.00655001
UID260	SAC3D1..29901./178	178	178-AFPQHCRPRDAERPPSPRSPLMPGCELPVGT	29901	SAC3D1	-0.722719	0.602129	-0.26333	0.707551	0.638057	0.345303	-0.54322	-0.00596968	0.0795442	-0.245116	0.361531	-0.0415672	-0.0103064	0.103093	0.108786	0.159798	-0.0150174	-0.0935696	-0.339703	0.542288	-0.592739	-0.347481	0.798387	0.123834	0.865233	0.547929	0.317043	-0.113899	28		SAC3D1..29901.	0.101635	0.200909	0.128318	0.0714318	0.0521626	0.113809	0.0184124	0.0219059	0.0384898	0.195854	0.0307469	0.155014	0.0371982
UID262	SAC3D1..29901./179	179	179-VVMAEEEDEGTDRPGSPA_____________	29901	SAC3D1	-0.0191242	-0.0227211	-0.198364	0.114495	-0.0284201	-0.256314	-0.174002	0.138857	-0.247806	-0.369082	-0.298767	0.157985	-0.204666	-0.153854	-0.246195	0.0253124	-0.436468	-0.303457	-0.438452	0.119077	-0.168598	-0.190955	-0.295307	-0.0844218	0.321349	0.0336011	-0.0615471	-0.0894178	28		SAC3D1..29901.	0.101635	0.200909	0.128318	0.0714318	0.0521626	0.113809	0.0184124	0.0219059	0.0384898	0.195854	0.0307469	0.155014	0.0371982
UID299	ZSWIM8..23053./204	204	204-LALGSRGGYNGRGWGSPGRPKKKHTGMASID	23053	ZSWIM8	0.0452242	-0.522665	-0.194939	0.911947	0.342038	-0.961956	-0.43316	0.116802	-0.419932	-1.48488	-0.642958	0.0984197	0.287031	0.331964	-0.766084	0.906228	-0.724828	-0.796283	-0.306818	-0.0887611	-1.6118	-0.487533	0.380635	-0.243675	0.55606	0.0665417	-0.691196	-0.787772	28		ZSWIM8..23053.	0.160779	0.0507176	0.0531719	0.202063	0.170859	0.147347	0.493553	0.330133	0.0532211	0.0588149	0.0159191	0.154915	0.100343
UID301	ZSWIM8..23053./205	205	205-EAESLCQNWRGWRKQSAGPNSPTGGGGGGGS	23053	ZSWIM8	0.901106	-0.450823	-0.478848	0.863152	0.111274	-1.36741	0.885884	-0.517848	0.38121	-0.266119	-0.43135	1.69505	0.401614	-0.153251	-0.18001	2.62846	1.51609	0.564822	-0.0888395	0.158679	0.958117	-0.294517	0.197464	-0.0772634	-0.0686703	0.930021	0.0261962	-0.887245	28		ZSWIM8..23053.	0.160779	0.0507176	0.0531719	0.202063	0.170859	0.147347	0.493553	0.330133	0.0532211	0.0588149	0.0159191	0.154915	0.100343
UID302	ZSWIM8..23053./206	206	206-CQNWRGWRKQSAGPNSPTGGGGGGGSGGTRM	23053	ZSWIM8	-0.169502	0.0069569	0.2666	-0.182141	0.585569	-0.950423	-0.0358375	-0.97228	-0.279562	-0.091083	-0.575773	-1.14516	0.151398	-0.029597	0.482725	-0.222636	-0.0732144	-1.19323	-0.368186	-0.269069	-0.736615	-0.170249	0.122252	-0.0282977	0.336711	0.0947488	-0.267008	-0.696169	28		ZSWIM8..23053.	0.160779	0.0507176	0.0531719	0.202063	0.170859	0.147347	0.493553	0.330133	0.0532211	0.0588149	0.0159191	0.154915	0.100343
UID304	ZSWIM8..23053./208	208	208-LGEGVPSSQRGPRRLSAEGGDKALHKMGPGG	23053	ZSWIM8	1.07556	0.233738	0.137683	0.350856	0.715493	-0.777727	0.576582	-0.215941	0.245522	0.0451813	-0.700293	0.629261	0.183732	0.0742296	0.322802	1.09756	0.596226	-0.118186	0.260156	0.558844	0.307177	0.266767	-0.0718689	0.196238	-0.186587	0.520703	-0.478232	-0.435238	28		ZSWIM8..23053.	0.160779	0.0507176	0.0531719	0.202063	0.170859	0.147347	0.493553	0.330133	0.0532211	0.0588149	0.0159191	0.154915	0.100343
UID305	ARHGAP32..9743./209	209	209-KAESECLESGASFLDSPGYSKDKPSANKKDA	9743	ARHGAP32	-0.196363	0.55393	-0.0481615	0.222549	-0.206099	-0.414952	0.324958	0.164857	0.383663	-0.0448248	0.608578	-0.107869	0.097019	-0.189989	0.455291	-0.452837	-0.292035	-0.468823	0.0430088	-0.297751	-0.00915051	NA	0.00917673	-0.0618896	0.337271	-0.0437679	0.42541	-0.020813	27		ARHGAP32..9743.	0.0412321	0.0157683	0.0179858	0.0218326	0.0340067	0.0500513	0.0380786	0.0516736	0.106933	0.00273203	0.0125819	0.0699113	0.0925565
UID306	ARHGAP32..9743./210	210	210-SVAEGKESRHAAKAISPEGEDRFYRRHPEAE	9743	ARHGAP32	-0.279708	0.0237103	-0.25007	1.29728	-0.799889	-1.0837	1.09515	-0.0722895	0.194289	-0.541399	-0.488973	-1.00358	0.404856	0.0279045	0.495305	-0.881824	0.179393	-0.354192	-0.666889	-0.715005	0.602897	NA	-0.629362	-0.247821	0.214478	-0.339523	0.0103655	NA	26		ARHGAP32..9743.	0.0412321	0.0157683	0.0179858	0.0218326	0.0340067	0.0500513	0.0380786	0.0516736	0.106933	0.00273203	0.0125819	0.0699113	0.0925565
UID310	ARHGAP32..9743./211	211	211-SQCQTPGSTASSEPVSPLQEKLSPFFTLDLS	9743	ARHGAP32	0.285514	-0.22484	-0.21783	0.261609	-0.489101	-0.0974782	1.14694	-0.159864	1.01336	-0.461121	0.0472109	-1.19893	0.670999	0.000299454	0.781026	-0.531019	-0.0469305	-0.305018	-0.81232	-0.784999	0.899263	0.0361094	-0.323067	-0.0020752	0.156937	-0.286539	0.337512	-0.0755043	28		ARHGAP32..9743.	0.0412321	0.0157683	0.0179858	0.0218326	0.0340067	0.0500513	0.0380786	0.0516736	0.106933	0.00273203	0.0125819	0.0699113	0.0925565
UID311	ARHGAP32..9743./212	212	212-STWDKCVEERDATNRSPTQIVKMKTNETVAQ	9743	ARHGAP32	-0.398009	0.325698	-0.392339	0.880572	-0.714736	-0.611316	1.00348	0.244823	0.638568	-0.028659	0.199543	-0.897799	0.480573	0.113513	0.650929	-0.156328	-0.513175	-0.166324	-0.527517	-1.19647	0.464645	-0.028093	-0.0345956	-0.319709	0.275351	-0.0210209	0.231092	0.0715116	28		ARHGAP32..9743.	0.0412321	0.0157683	0.0179858	0.0218326	0.0340067	0.0500513	0.0380786	0.0516736	0.106933	0.00273203	0.0125819	0.0699113	0.0925565
UID312	ARHGAP32..9743./213	213	213-PRFYSGDQPPSYLGASVDKLHHPLEFADKSP	9743	ARHGAP32	-0.203811	0.115918	-0.430829	1.32549	-0.433171	-0.255149	-0.0295941	0.890185	1.08194	-0.844294	0.416554	-0.421144	0.119505	0.0902259	0.201448	-0.370895	-0.659748	-0.0219092	-0.306392	-0.964188	-0.254621	0.505704	-0.0410193	-0.484391	0.0715017	-0.0466601	0.569236	0.437467	28		ARHGAP32..9743.	0.0412321	0.0157683	0.0179858	0.0218326	0.0340067	0.0500513	0.0380786	0.0516736	0.106933	0.00273203	0.0125819	0.0699113	0.0925565
UID313	ARHGAP32..9743./214	214	214-TPPNLPSDKIYPPSGSPEENTSTATMTYMTT	9743	ARHGAP32	-0.024488	NA	0.175749	0.552845	NA	0.0634377	0.641224	0.105841	0.109607	-0.0349312	0.794892	-0.385276	0.351774	0.126508	NA	NA	0.448054	0.248946	-0.0591803	-0.226046	0.364665	NA	-0.13028	0.167891	0.446563	NA	0.101424	-0.102935	22		ARHGAP32..9743.	0.0412321	0.0157683	0.0179858	0.0218326	0.0340067	0.0500513	0.0380786	0.0516736	0.106933	0.00273203	0.0125819	0.0699113	0.0925565
UID314	ARHGAP32..9743./215	215	215-STASSEPVSPLQEKLSPFFTLDLSPTEDKSS	9743	ARHGAP32	0.590954	0.172242	-0.782547	0.843462	-0.245669	NA	0.935628	0.601335	NA	0.702489	-0.0479527	0.163928	0.647416	-0.204293	0.516241	-0.33275	0.0225754	NA	-0.398176	-0.255524	0.601888	0.22656	-0.402762	0.392832	0.538343	0.324815	0.469084	NA	24		ARHGAP32..9743.	0.0412321	0.0157683	0.0179858	0.0218326	0.0340067	0.0500513	0.0380786	0.0516736	0.106933	0.00273203	0.0125819	0.0699113	0.0925565
UID315	ARHGAP32..9743./216	216	216-SPLQEKLSPFFTLDLSPTEDKSSKPSSFTEK	9743	ARHGAP32	-0.538783	-0.57933	0.291774	0.641422	-0.446252	-0.948611	1.22444	0.148873	0.502779	-0.566648	0.154115	-0.228661	0.368	-0.129852	0.511444	-0.623321	-0.280116	-0.0712355	-0.694105	-0.799338	0.388219	0.258272	-0.181948	-0.694386	0.0452541	0.00977707	0.216416	-0.0517387	28		ARHGAP32..9743.	0.0412321	0.0157683	0.0179858	0.0218326	0.0340067	0.0500513	0.0380786	0.0516736	0.106933	0.00273203	0.0125819	0.0699113	0.0925565
UID316	ARHGAP32..9743./217	217	217-GKSSSVSKRKLQRNESEPSEMKAMALKGGRA	9743	ARHGAP32	0.159015	0.216519	0.646187	1.02651	-0.374779	-0.175579	1.37541	0.306437	0.767693	0.166082	0.520806	-0.726293	0.475759	-0.353203	0.618344	-0.360516	0.417054	-0.0346662	-0.464733	-0.552799	1.50359	0.25971	-0.0908624	-0.0509033	0.0949265	-0.456128	0.951839	-0.284334	28		ARHGAP32..9743.	0.0412321	0.0157683	0.0179858	0.0218326	0.0340067	0.0500513	0.0380786	0.0516736	0.106933	0.00273203	0.0125819	0.0699113	0.0925565
UID318	ARHGAP32..9743./219	219	219-GKNSMPTVSFLDQDQSPPRFYSGDQPPSYLG	9743	ARHGAP32	0.122289	0.120927	-0.254045	0.274258	-0.379526	-0.25496	-0.0601425	-0.145202	-0.0587063	0.23782	-0.154106	0.093761	-0.209121	-0.236235	0.103462	0.250912	0.0128503	-0.409365	-0.269847	0.506932	-0.080759	NA	-0.144705	-0.517948	0.0310979	-0.154566	-0.00435257	NA	26		ARHGAP32..9743.	0.0412321	0.0157683	0.0179858	0.0218326	0.0340067	0.0500513	0.0380786	0.0516736	0.106933	0.00273203	0.0125819	0.0699113	0.0925565
UID323	ARHGAP32..9743./221	221	221-RPQNKMKKSPVGSWRSFFNLGKSSSVSKRKL	9743	ARHGAP32	-0.655328	0.263235	-0.119109	0.901834	-0.590615	-0.599839	0.60592	0.923346	0.604164	-0.545902	0.749119	-0.879317	-0.190912	-0.213024	0.147439	-1.1555	-0.823182	-0.0208596	-0.967639	-2.08169	1.09181	-0.13888	-0.183678	-0.488649	0.213912	-0.125431	-0.10747	-0.16962	28		ARHGAP32..9743.	0.0412321	0.0157683	0.0179858	0.0218326	0.0340067	0.0500513	0.0380786	0.0516736	0.106933	0.00273203	0.0125819	0.0699113	0.0925565
UID324	ARHGAP32..9743./222	222	222-SMAMQEGAASLSRPKSLLVSSPSTKLLTLEE	9743	ARHGAP32	NA	-1.02765	-0.474457	-0.267111	-1.13276	-0.48664	NA	0.802786	-0.40874	0.172711	-0.506627	NA	-0.667989	-0.836587	-0.562362	1.2377	-0.459743	0.351669	-0.787989	NA	NA	NA	-0.734762	-0.883777	NA	-0.90029	NA	0.168648	20		ARHGAP32..9743.	0.0412321	0.0157683	0.0179858	0.0218326	0.0340067	0.0500513	0.0380786	0.0516736	0.106933	0.00273203	0.0125819	0.0699113	0.0925565
UID326	ARHGAP32..9743./224	224	224-AASLSRPKSLLVSSPSTKLLTLEEAQARTQA	9743	ARHGAP32	0.0115504	-0.106816	0.496705	0.283998	-0.608253	-0.234443	1.21469	0.671137	-0.225471	0.635788	-0.108783	-0.218561	-0.48472	-0.711384	-0.554746	-0.0598021	0.96969	0.287887	-0.242473	-1.03376	1.87669	-0.524262	-0.519149	-0.859844	-0.656453	-0.439878	-0.572684	-0.440528	28		ARHGAP32..9743.	0.0412321	0.0157683	0.0179858	0.0218326	0.0340067	0.0500513	0.0380786	0.0516736	0.106933	0.00273203	0.0125819	0.0699113	0.0925565
UID328	ARHGAP32..9743./226	226	226-VVYAFSPKIGRKLSKSPSMSISEPISVTLPP	9743	ARHGAP32	-0.121665	-0.179067	0.0109708	0.364822	-0.143634	-0.00418162	0.0372481	-0.210217	-0.214002	-0.160982	-0.25294	0.0706444	-0.195157	-0.20585	0.0523672	-0.0890045	-0.0305793	-0.125563	-0.199232	-0.0933895	0.224891	0.132223	-0.0675895	-0.0320792	0.0680399	-0.462259	0.0234673	0.0112743	28		ARHGAP32..9743.	0.0412321	0.0157683	0.0179858	0.0218326	0.0340067	0.0500513	0.0380786	0.0516736	0.106933	0.00273203	0.0125819	0.0699113	0.0925565
UID330	ARHGAP32..9743./228	228	228-ASVDKLHHPLEFADKSPTPPNLPSDKIYPPS	9743	ARHGAP32	-0.429568	0.058768	-1.96155	0.706431	-0.652714	-0.477753	0.213802	0.0699911	0.477813	-1.74995	-0.00206852	-0.898685	0.196788	-0.650257	-0.0454516	-0.522964	-0.74437	-0.634335	-0.691998	-0.813368	-0.545689	-0.223861	-0.556042	-0.262924	0.083409	-0.148633	-0.181811	-0.215448	28		ARHGAP32..9743.	0.0412321	0.0157683	0.0179858	0.0218326	0.0340067	0.0500513	0.0380786	0.0516736	0.106933	0.00273203	0.0125819	0.0699113	0.0925565
UID332	ARHGAP32..9743./229	229	229-AVDGDSKLFRPRRPRSSSDALSASFNGEMLG	9743	ARHGAP32	-0.204933	0.122199	-0.100163	0.312281	-0.0093255	-0.320744	0.426151	0.0646753	0.0308881	-0.456901	-0.188269	0.155003	0.221404	-0.198473	-0.309342	-0.325516	0.11214	-0.0249817	-0.135454	0.201153	0.211104	0.216812	-0.126752	0.0166759	-0.0537405	-0.292864	0.131777	-0.147757	28		ARHGAP32..9743.	0.0412321	0.0157683	0.0179858	0.0218326	0.0340067	0.0500513	0.0380786	0.0516736	0.106933	0.00273203	0.0125819	0.0699113	0.0925565
UID334	ARHGAP32..9743./230	230	230-LTLEEAQARTQAQVNSPIVTENKYIEVGEGP	9743	ARHGAP32	-0.35649	-0.511338	-0.559323	0.448004	-0.258796	-0.445409	0.866512	0.0200901	0.690045	-0.49107	-0.184723	-0.478298	-0.0682895	-0.2928	-0.158001	-0.758062	-0.73087	-0.178397	-0.717937	-0.634636	0.0814791	0.333109	-0.895406	-0.602144	0.0601139	-0.28015	-0.172222	-0.053606	28		ARHGAP32..9743.	0.0412321	0.0157683	0.0179858	0.0218326	0.0340067	0.0500513	0.0380786	0.0516736	0.106933	0.00273203	0.0125819	0.0699113	0.0925565
UID335	ARHGAP32..9743./231	231	231-SSKPSSFTEKVVYAFSPKIGRKLSKSPSMSI	9743	ARHGAP32	-0.641813	0.098412	-0.0522989	0.777181	-0.707263	-0.563665	0.684529	0.16514	0.837633	-0.802357	0.309811	-1.17038	0.243373	-0.18956	0.279313	-0.559886	-0.519525	-0.240465	-0.697378	-1.66443	-0.174263	0.112746	-0.144941	-0.343604	-0.0307802	-0.260788	0.335098	0.0558027	28		ARHGAP32..9743.	0.0412321	0.0157683	0.0179858	0.0218326	0.0340067	0.0500513	0.0380786	0.0516736	0.106933	0.00273203	0.0125819	0.0699113	0.0925565
UID336	DISP2..85455./232	232	232-YKQAGPSPKTRARQDSQGEEAEPLPASPEAP	85455	DISP2	0.802021	-0.151907	NA	NA	NA	NA	-0.447669	NA	NA	NA	-0.261121	-0.245039	NA	NA	-0.667642	-0.130498	1.78163	NA	0.00970745	-0.633871	NA	NA	-0.0782089	NA	0.0791388	0.243829	0.563284	NA	14		DISP2..85455.	0.0136708	0.024033	0.01249	0.0131766	0.0172465	0.0113165	0.0781314	0.0612658	0.0382153	0.0058705	0.00745047	0.0540045	0.015742
UID339	DISP2..85455./233	233	233-HSSLSWKGRGGPGDGSPVVLPNSQPDLPDVW	85455	DISP2	0.566506	-0.0849837	0.561766	0.245551	0.454456	NA	-0.178912	0.166571	NA	0.288378	-0.11528	0.0231066	-0.145487	0.308108	-0.127829	-0.0968323	1.30722	-0.113152	0.0926766	-0.264921	-0.420389	0.497215	-0.220455	-0.324303	-0.166722	0.17059	0.0699633	NA	25		DISP2..85455.	0.0136708	0.024033	0.01249	0.0131766	0.0172465	0.0113165	0.0781314	0.0612658	0.0382153	0.0058705	0.00745047	0.0540045	0.015742
UID340	DISP2..85455./234	234	234-SCSEQYELQPLARRRSPSFDTSTATSKLSHR	85455	DISP2	0.889119	-0.644664	NA	NA	NA	NA	-0.258758	NA	NA	NA	-0.244929	-0.364198	NA	NA	-0.496589	0.12207	2.09943	NA	0.142517	-0.385641	NA	NA	-0.43581	NA	0.104556	-0.268638	0.0153875	NA	14		DISP2..85455.	0.0136708	0.024033	0.01249	0.0131766	0.0172465	0.0113165	0.0781314	0.0612658	0.0382153	0.0058705	0.00745047	0.0540045	0.015742
UID342	TBKBP1..9755./236	236	236-PRAYGSELYGPGRPLSPRRAFEGIRLRFEKQ	9755	TBKBP1	1.10655	-1.33705	-0.428279	-0.756316	-0.490098	NA	-1.39668	-0.798581	NA	-0.271826	-1.85206	-0.966726	-0.891902	-0.872227	-1.39632	-0.311222	0.113054	NA	-1.41164	0.71046	-0.754221	-1.02004	-0.86949	-0.0255604	-0.681419	-0.668044	-0.157337	NA	24		TBKBP1..9755.	0.729807	0.135015	0.113424	0.0512249	0.106248	0.0623451	0.138694	0.156229	0.105007	0.0404137	0.187416	0.141003	0.0537519
UID345	SOBP..55084./237	237	237-EHGRSEVVDLTRRAGSPPGPPGAGGQLGFPG	55084	SOBP	-0.99561	-0.121514	-0.872712	-0.829554	-0.0103493	-0.193343	-0.165793	-0.161522	-0.69752	-0.502906	-0.778519	-0.415899	-0.470301	0.191524	-0.352196	-0.493725	1.01906	-0.797205	-0.428898	0.245149	-0.397453	-0.76585	-0.197372	0.180013	-0.00392596	-0.440699	-0.0904775	-0.6823	28		SOBP..55084.	0.0279051	0.135466	0.0136437	0.0389902	0.0497505	0.0657747	0.0326193	0.0349722	0.035417	0.0502557	0.00794792	0.0376554	0.0250859
UID348	POM121C..100101267./239	239	239-LQAETATKPQATSAPSPAPKQSFLFGTQNTS	100101267	POM121C	0.497921	0.255432	-0.469959	-0.325899	-0.311468	0.512068	-0.154179	0.151015	0.0947102	0.53094	-0.279853	-0.404635	-0.270333	-0.237255	-0.273531	0.237086	0.348742	-0.598259	0.315308	0.0665689	0.257175	-0.507624	-0.708729	0.074103	0.0514646	-0.147853	-0.283641	0.224786	28		POM121C..100101267.	0.443979	0.115849	0.574572	0.930739	0.697113	0.884882	0.683769	0.585315	0.567668	0.139935	0.68964	0.422996	0.54327
UID349	POM121C..100101267./240	240	240-PSSNAPDPCAKETVLSALKEKEKKRTVEEED;PSSNAPDPCAKETVLSALKEKKKKRTVEEED	100101267	POM121C	-0.0729931	-0.0149143	-0.865782	-0.219209	-0.402974	0.0412362	-0.687949	-0.292977	0.104065	-0.047061	-0.922605	-0.368347	-0.993738	-0.158995	-0.885692	0.438122	0.596928	0.336703	0.562419	-0.0727971	-0.819675	-0.626217	-0.821445	-0.0945277	0.0840373	-0.0728559	-1.47917	0.119337	28		POM121C..100101267.	0.443979	0.115849	0.574572	0.930739	0.697113	0.884882	0.683769	0.585315	0.567668	0.139935	0.68964	0.422996	0.54327
UID351	POM121C..100101267./242	242	242-WWGLSREPRGSRPLSSFVQKARHRRTLFASP	100101267	POM121C	-0.918864	-0.618095	0.691292	-1.1338	-0.404821	-0.869938	-0.578874	-0.706474	-1.24381	-0.422407	-1.11767	-1.15493	-0.135445	-1.01753	NA	NA	2.0118	-0.562269	-0.576398	-1.28995	1.55277	-0.92779	-1.08797	-1.19454	-0.986541	NA	-1.12282	NA	24		POM121C..100101267.	0.443979	0.115849	0.574572	0.930739	0.697113	0.884882	0.683769	0.585315	0.567668	0.139935	0.68964	0.422996	0.54327
UID352	POM121C..100101267./243	243	243-QGEKAADTTPRKKQNSNSQSTPGSSGQRKRK	100101267	POM121C	0.243108	-0.0823908	0.529762	0.178736	1.1719	-0.106388	NA	NA	0.091465	1.61179	NA	-0.767682	NA	0.207663	0.812089	0.11908	NA	NA	NA	-0.759794	0.265505	0.0658935	NA	0.327602	-0.369354	-0.785635	0.417251	-0.176514	20		POM121C..100101267.	0.443979	0.115849	0.574572	0.930739	0.697113	0.884882	0.683769	0.585315	0.567668	0.139935	0.68964	0.422996	0.54327
UID355	POM121C..100101267./246	246	246-HKKAVLSPRNSRMVCSPVTVRIAPPDRRFSR	100101267	POM121C	0.0875273	0.351084	0.213201	-0.140619	-0.0784626	0.412071	NA	NA	0.185372	0.467012	NA	-0.371672	NA	0.0894337	0.112057	0.706896	NA	NA	NA	-0.410197	0.249545	-0.0416034	NA	0.500469	0.703499	0.171842	-0.295248	0.124251	20		POM121C..100101267.	0.443979	0.115849	0.574572	0.930739	0.697113	0.884882	0.683769	0.585315	0.567668	0.139935	0.68964	0.422996	0.54327
UID357	POM121C..100101267./247	247	247-TRGISQLWKRNGPSSSPFSSPASSRSQTPER	100101267	POM121C	-0.10725	0.530129	0.38402	0.899953	-0.153697	0.0650191	-0.230781	-0.164163	0.555319	0.479968	0.184898	-0.945751	0.36981	0.151121	0.637527	0.988542	0.917055	-0.0765607	0.185374	-0.0877404	0.556532	-0.0410328	0.0825295	0.972977	0.41733	0.192163	-0.199048	0.23068	28		POM121C..100101267.	0.443979	0.115849	0.574572	0.930739	0.697113	0.884882	0.683769	0.585315	0.567668	0.139935	0.68964	0.422996	0.54327
UID365	POM121C..100101267./248	248	248-______________MSPAAAAAGAGERRRPI	100101267	POM121C	-0.557988	-0.165993	-1.06788	-0.377369	0.389701	0.238939	-0.403539	-0.222034	-0.584431	-1.80178	-0.75206	-1.13276	-0.427204	-0.0379791	-0.720149	0.318088	-0.132997	-0.496698	0.19197	-0.122417	-1.35703	-1.40791	-0.835641	-0.12081	-0.571514	-0.679237	-1.46589	-0.600327	28		POM121C..100101267.	0.443979	0.115849	0.574572	0.930739	0.697113	0.884882	0.683769	0.585315	0.567668	0.139935	0.68964	0.422996	0.54327
UID366	POM121C..100101267./249	249	249-TSTPTFNIPFGSSAKSPLPSYPGANPQPAFG	100101267	POM121C	1.02564	-0.0416255	-0.378741	0.0145939	-0.473438	0.138276	0.209169	0.243317	0.448594	0.942873	-0.189179	0.206804	-0.185992	-0.187478	-0.178876	0.431016	-0.0464896	-0.219427	-0.0489203	0.706666	0.808258	-0.568512	-0.158027	-0.287129	-0.185347	-0.163546	-0.423729	0.0946579	28		POM121C..100101267.	0.443979	0.115849	0.574572	0.930739	0.697113	0.884882	0.683769	0.585315	0.567668	0.139935	0.68964	0.422996	0.54327
UID367	POM121C..100101267./250	250	250-NGPSSSPFSSPASSRSQTPERPAKKIREEEL	100101267	POM121C	-0.14976	0.0251295	0.252066	0.464553	0.204545	0.273507	0.296773	0.541673	0.492501	0.907873	0.0988536	0.321681	0.445411	0.226176	0.282354	0.708309	0.0535541	0.29895	0.709537	0.00232108	0.388293	0.0456133	-0.33805	0.373058	0.0203164	0.00221697	-0.223426	0.227491	28		POM121C..100101267.	0.443979	0.115849	0.574572	0.930739	0.697113	0.884882	0.683769	0.585315	0.567668	0.139935	0.68964	0.422996	0.54327
UID380	DDX11..1663./257	257	257-QLESGEEELVLAEYESDEEKKVASRAPSDAT	1663	DDX11	-0.283577	NA	NA	-0.108215	0.407228	0.779022	-0.192891	0.281674	-0.0706384	-0.250264	NA	0.249782	0.00161338	0.102426	-0.426589	0.00123215	NA	0.143327	NA	0.110829	-0.954093	-0.0762148	NA	0.135991	0.796758	0.423648	-0.0945959	0.13779	22		DDX11..1663.	0.948006	0.9386	0.674427	0.958577	0.943727	0.828418	0.941113	0.932983	0.908156	0.976057	0.968222	0.864525	0.932793
UID383	FAM171A2..284069./259	259	259-PGPLHSAFSSSRDLASSRDDFFRTKPRSASR	284069	FAM171A2	-0.898864	-0.19187	NA	NA	NA	NA	-0.305964	NA	NA	NA	-0.408242	-1.09173	NA	NA	-0.69549	0.374647	0.237381	NA	-0.615844	-0.30782	NA	NA	-0.637794	NA	0.0446215	-0.519446	-0.62568	NA	14		FAM171A2..284069.	0.124	0.0687	0.0551	0.0678	0.122	0.0853	0.759	0.0878	0.11	0.0712	0.0106	0.196	0.0862
UID384	FAM171A2..284069./260	260	260-GPLHSAFSSSRDLASSRDDFFRTKPRSASRP	284069	FAM171A2	-0.898864	-0.19187	NA	NA	NA	NA	-0.305964	NA	NA	NA	-0.408242	-1.09173	NA	NA	-0.69549	0.374647	0.237381	NA	-0.615844	-0.30782	NA	NA	-0.637794	NA	0.0446215	-0.519446	-0.62568	NA	14		FAM171A2..284069.	0.124	0.0687	0.0551	0.0678	0.122	0.0853	0.759	0.0878	0.11	0.0712	0.0106	0.196	0.0862
UID385	FAM171A2..284069./261	261	261-RGDSSRSSASELRRDSLTSPEDELGAEVGDE	284069	FAM171A2	-2.01945	-1.32367	-1.67338	-1.72677	0.651276	-1.58427	-2.33301	-1.59062	-2.22946	-0.159376	-1.75511	-2.02059	-2.24992	-1.32751	-1.30815	0.893459	-0.177644	-1.6219	-1.35799	0.585675	-1.22187	-2.20231	-1.61877	0.814374	-0.585803	-0.691602	-2.0496	-1.62043	28		FAM171A2..284069.	0.124	0.0687	0.0551	0.0678	0.122	0.0853	0.759	0.0878	0.11	0.0712	0.0106	0.196	0.0862
UID388	PHF20L1..51105./262	262	262-LTLVSQLSSSVINKTSPPQPVNPPRPFKHSE	51105	PHF20L1	-0.586892	0.222941	-0.391402	0.0138018	-0.146606	-0.255679	-0.280869	-0.0132554	-0.895433	-0.499755	-0.801541	-0.172106	-0.0177078	0.0761646	-0.496218	0.302535	-0.542904	-0.313673	-0.385841	-0.0430033	-0.54988	-0.76441	-0.367195	-0.79469	-0.538158	-0.279381	-0.310431	-0.0780373	28		PHF20L1..51105.	0.0234	0.0374	0.0387	0.021	0.00814	0.0187	0.00328	0.0286	0.0286	0.0221	0.0367	0.0314	0.00295
UID389	PHF20L1..51105./263	263	263-RLATLPMPDDSVEKVSSPSPATDGKVFSISS	51105	PHF20L1	0.272691	-0.23456	NA	-0.796087	-0.078124	-0.437515	0.256541	NA	-0.524199	NA	-0.208488	-0.720097	NA	NA	-0.425897	0.285405	-0.256948	NA	-0.555695	0.373594	NA	-0.752157	-0.0242968	-1.20426	-0.326811	-0.814447	-0.353538	-0.333899	21		PHF20L1..51105.	0.0234	0.0374	0.0387	0.021	0.00814	0.0187	0.00328	0.0286	0.0286	0.0221	0.0367	0.0314	0.00295
UID395	ESPN..83715./267	267	267-AFQPDSPLPSVSPALSPVRSPTPPAAGFQPL	83715	ESPN	0.319847	-0.364331	-0.576518	-0.127872	0.636452	-1.13494	-0.62638	-1.00531	-0.765065	-0.353041	-0.504598	-0.619862	-1.39827	-1.09913	-0.694369	-0.431105	-0.694672	-0.777138	-0.658737	-0.707518	-0.776769	-0.51251	-0.233608	-1.02293	0.231744	0.0214106	-0.58626	-0.353613	28		ESPN..83715.	0.133731	0.188558	0.0685642	0.420458	0.0798532	0.0467454	0.150346	0.164283	0.203098	0.038719	0.0127883	0.0578971	0.0952142
UID396	ESPN..83715./268	268	268-GCGQRRSSSSTGSTKSFNMMSPTGDNSELLA	83715	ESPN	2.91137	0.100899	-0.0664635	-0.0975471	0.167631	NA	-0.129524	0.83875	NA	0.100421	0.433058	-0.0484099	0.00731611	-0.168607	-0.0328655	-0.521584	-0.2687	NA	-0.106848	0.123519	0.150485	1.01407	-0.12512	-0.327741	-0.170973	-0.172841	0.0856954	NA	24		ESPN..83715.	0.133731	0.188558	0.0685642	0.420458	0.0798532	0.0467454	0.150346	0.164283	0.203098	0.038719	0.0127883	0.0578971	0.0952142
UID397	ESPN..83715./269	269	269-RSSSSTGSTKSFNMMSPTGDNSELLAEIKAG	83715	ESPN	0.952186	-0.108602	-0.0201845	-0.214484	0.977583	-0.613706	-0.26259	-0.50487	-0.106419	0.435734	NA	-0.63351	-0.678561	-0.61974	-0.380971	-0.527478	NA	NA	NA	-0.480203	-0.252134	0.225668	NA	-0.64283	0.0796566	0.147518	-0.280003	-0.293423	23		ESPN..83715.	0.133731	0.188558	0.0685642	0.420458	0.0798532	0.0467454	0.150346	0.164283	0.203098	0.038719	0.0127883	0.0578971	0.0952142
UID400	MYO9A..4649./272	272	272-LPGSCRKEFKENKEPSPKAKRKRSVKISNVA	4649	MYO9A	0.394576	-0.093478	-0.565794	0.726936	-0.224098	0.374722	0.286349	0.0692024	1.17808	0.155388	1.10115	-0.0767562	0.159498	-0.682975	0.19856	0.358819	0.776011	NA	0.500607	-0.0380759	0.690624	0.267509	-0.192674	0.265134	0.151264	0.827682	0.573475	0.56955	27		MYO9A..4649.	0.244694	0.0103091	0.0846135	0.040972	0.0712366	0.073847	0.0180821	0.0345152	0.0480192	0.0103608	0.236292	0.0605905	0.0400529
UID403	MYO9A..4649./273	273	273-SNRISRESSVDCLKESPNKQQERAQSQSGVD	4649	MYO9A	-0.0596037	-0.151024	NA	NA	NA	NA	-0.339244	NA	NA	NA	-0.422891	0.509807	NA	NA	-1.04948	0.734402	-0.067318	NA	0.713379	-0.297141	NA	NA	-0.836998	NA	-0.517537	0.965367	-0.59166	NA	14		MYO9A..4649.	0.244694	0.0103091	0.0846135	0.040972	0.0712366	0.073847	0.0180821	0.0345152	0.0480192	0.0103608	0.236292	0.0605905	0.0400529
UID408	MYO9A..4649./274	274	274-KLESVISDEGDLQFPSPKISSSPKFDSRDNA	4649	MYO9A	0.193107	0.0597198	-0.275904	0.360757	-0.0928688	-0.0717614	0.105836	-0.00325489	0.106061	0.213479	0.0604819	0.02058	0.368937	-0.279355	0.218258	0.414988	0.375653	0.110415	0.370033	-0.173999	0.0295029	0.388033	-0.303517	-0.00589323	0.0825914	0.419911	0.0276403	0.28777	28		MYO9A..4649.	0.244694	0.0103091	0.0846135	0.040972	0.0712366	0.073847	0.0180821	0.0345152	0.0480192	0.0103608	0.236292	0.0605905	0.0400529
UID412	MYO9A..4649./275	275	275-EDRRWSTELVPEGLQSPRGTPDSESSQGSLE	4649	MYO9A	0.182049	-0.123326	-0.0601277	0.365595	-0.115842	0.0552789	0.219885	0.0829363	0.237979	-0.325183	0.158949	-0.0092907	0.0090402	-0.376074	-0.142782	-0.205124	0.338868	-0.0716732	-0.0657635	0.275811	0.490788	-0.0693493	-0.240878	0.0309292	0.0294962	0.00252374	0.137508	-0.0546036	28		MYO9A..4649.	0.244694	0.0103091	0.0846135	0.040972	0.0712366	0.073847	0.0180821	0.0345152	0.0480192	0.0103608	0.236292	0.0605905	0.0400529
UID413	MYO9A..4649./276	276	276-GVDLQEDVLVRERPRSLEDLHQKKVGRAKRE	4649	MYO9A	0.672118	-0.0716634	-0.338727	0.33792	-0.175036	0.251178	-0.0231015	0.364549	0.455375	-0.471689	0.190855	0.14246	0.145748	-0.963037	-0.0241187	1.71541	0.352791	0.488552	0.614836	0.314079	0.236802	0.959184	-0.214105	0.0248769	0.310647	0.915333	-0.124732	0.563835	28		MYO9A..4649.	0.244694	0.0103091	0.0846135	0.040972	0.0712366	0.073847	0.0180821	0.0345152	0.0480192	0.0103608	0.236292	0.0605905	0.0400529
UID414	MYO9A..4649./277	277	277-IFSLELLKVRSLGGISPSEDRRWSTELVPEG	4649	MYO9A	0.105439	-0.0720799	0.325434	0.440254	0.0301986	0.0676444	0.431667	-0.437591	0.651177	-0.011951	0.628267	0.0459941	0.0354896	-0.992205	0.157515	0.751372	0.701136	0.467817	0.513439	-0.1319	0.3787	0.23967	-0.0137165	-0.0159993	-0.0262591	0.356495	0.164874	0.168641	28		MYO9A..4649.	0.244694	0.0103091	0.0846135	0.040972	0.0712366	0.073847	0.0180821	0.0345152	0.0480192	0.0103608	0.236292	0.0605905	0.0400529
UID415	MYO9A..4649./278	278	278-SLELLKVRSLGGISPSEDRRWSTELVPEGLQ	4649	MYO9A	0.19789	0.0376906	0.350633	NA	NA	-0.0582585	0.258476	-0.361495	0.406568	NA	0.29528	0.177165	0.00738668	NA	-0.0395966	0.713346	0.514074	-0.116043	0.198957	0.113761	NA	NA	0.0247645	NA	-0.091609	0.320281	-0.0465879	NA	20		MYO9A..4649.	0.244694	0.0103091	0.0846135	0.040972	0.0712366	0.073847	0.0180821	0.0345152	0.0480192	0.0103608	0.236292	0.0605905	0.0400529
UID416	MYO9A..4649./279	279	279-KAIEECKSVIESNRISRESSVDCLKESPNKQ	4649	MYO9A	NA	0.0565224	-0.143985	0.590729	0.124387	0.463035	-0.16557	0.773778	0.436664	-0.504522	1.22602	0.0481701	0.765677	NA	0.366662	0.927884	0.280902	0.164481	0.102969	-0.108726	NA	0.49361	0.0369966	0.0967655	0.622616	0.629487	NA	0.117135	24		MYO9A..4649.	0.244694	0.0103091	0.0846135	0.040972	0.0712366	0.073847	0.0180821	0.0345152	0.0480192	0.0103608	0.236292	0.0605905	0.0400529
UID417	MYO9A..4649./280	280	280-RFSSVDEQAKLHKTMSQGEITKLAVRQKASD	4649	MYO9A	0.452843	-0.0224628	0.248223	0.371607	0.228996	0.188467	-0.0549622	0.0686467	0.324524	-0.0986431	0.602365	-0.12604	0.11917	-0.248394	0.119615	0.131189	0.620788	0.19647	0.301365	-0.0869317	0.760469	0.192225	-0.0720489	0.408005	0.163891	0.318945	0.519876	0.0607351	28		MYO9A..4649.	0.244694	0.0103091	0.0846135	0.040972	0.0712366	0.073847	0.0180821	0.0345152	0.0480192	0.0103608	0.236292	0.0605905	0.0400529
UID435	ZNF552..79818./288	288	288-YIQRETQVRTPMAGVSPKKAHPCEMCGPILG	79818	ZNF552	0.238051	-0.645131	-1.11535	-0.00577497	-0.792605	-0.0645302	-0.554712	0.656302	-0.230379	-0.63879	-0.339871	0.264749	-0.46937	-0.248929	-0.576379	-1.06636	-1.02328	-0.418832	-0.719213	-0.871452	-0.614025	-0.566508	-0.699752	-0.416436	-0.702806	0.0832589	-1.18993	0.0925846	28		ZNF552..79818.	0.012523	0.09847	0.00569549	0.0171471	0.0220772	0.0126608	0.043507	0.037299	0.0136789	0.0218097	0.00516674	0.0635354	0.0149846
UID436	PPP1R3G..648791./289	289	289-EQEELLECRRRCRARSFSLPADPILQAAKFL	648791	PPP1R3G	1.34765	0.531873	0.370564	-0.16455	-0.105905	0.770858	0.1818	-0.227429	-0.207324	2.04829	-0.00471306	1.24966	1.06318	-0.166282	-0.386313	-0.0752258	-0.0741138	0.189132	0.454154	-0.0224423	0.754507	1.06813	0.363483	-0.273993	-0.0678511	0.387299	0.357478	1.43346	28		PPP1R3G..648791.	0.0517691	0.0366473	0.221915	0.0164802	0.0105842	0.0921941	0.0411509	0.078521	0.0254087	0.0566097	0.329204	0.0639925	0.0619894
UID437	PPP1R3G..648791./290	290	290-EELLECRRRCRARSFSLPADPILQAAKFLQQ	648791	PPP1R3G	1.49149	0.141674	-0.146902	-0.161992	-0.299686	0.832092	NA	-0.388386	-0.20334	2.72518	NA	1.34268	1.19232	-0.0582433	-0.312889	0.0397692	NA	0.0439715	NA	0.117272	0.743836	1.37782	NA	-0.226199	-0.134211	0.3977	0.339609	1.487	23		PPP1R3G..648791.	0.0517691	0.0366473	0.221915	0.0164802	0.0105842	0.0921941	0.0411509	0.078521	0.0254087	0.0566097	0.329204	0.0639925	0.0619894
UID438	AJM1..389813./291	291	291-KSAPRAPPGLTPAPASPPVLPRRGREAQRAA	389813	AJM1	0.613591	-0.0947595	0.00750033	-0.109647	-0.137931	0.342872	-0.0889788	0.507462	0.153294	0.0387986	-0.268937	-0.0822721	-0.0170736	-0.133215	0.456573	0.861906	0.202949	-0.321024	0.127024	0.510642	0.327701	-0.197445	0.197591	0.0216346	-0.0216889	-0.0872164	-0.3276	-0.155739	28		AJM1..389813.	0.214192	0.0176678	0.0472703	0.264538	0.0535766	0.128802	0.0814406	0.100875	0.117993	0.0192308	0.0216846	0.0431818	0.0653656
UID443	TMEM238..388564./295	295	295-RARRAARAPPPPAAGSRRVRLQLATLEAGPG	388564	TMEM238	-0.00128826	0.239958	0.476554	-0.25327	-1.13202	-0.52704	0.196132	0.968053	-0.470537	-0.874424	0.163652	0.0829954	0.793729	-0.0320994	0.55136	-1.22392	-0.858477	-0.504064	0.0152054	-0.451986	0.389936	-0.246283	0.325609	-0.901692	-0.492032	-0.883669	0.633656	-0.762169	28		TMEM238..388564.	0.169525	0.207055	0.0485262	0.107944	0.0769004	0.0930221	0.0575342	0.0527559	0.0962453	0.0787563	0.142714	0.142776	0.0756963
UID444	TMEM238..388564./296	296	296-PSALARLARKLSRRWSAPAAAGQRPAPGSRR	388564	TMEM238	1.64148	-0.941385	-0.0157914	-0.833341	-0.901929	-0.750765	0.363594	1.88512	1.30468	0.501821	1.44634	0.445626	1.66125	0.190465	1.96487	-1.48641	-0.76338	0.233324	1.43745	-1.59331	2.90079	0.488635	1.3606	-1.0627	-1.10412	0.695543	1.03923	-0.101924	28		TMEM238..388564.	0.169525	0.207055	0.0485262	0.107944	0.0769004	0.0930221	0.0575342	0.0527559	0.0962453	0.0787563	0.142714	0.142776	0.0756963
UID445	MCRIP1..348262./297	297	297-VSRVVYNGKRTSSPRSPPSSSEIFTPAHEEN	348262	MCRIP1	-0.481542	-0.908569	0.12672	-0.51398	0.497676	-0.2324	-0.996006	0.0436996	-0.691329	-0.787742	-0.595714	-0.0289202	-0.605222	-0.235421	-0.73592	1.21841	-0.202377	-0.0892851	-0.515684	0.365299	-0.241126	-0.358563	-0.435384	-0.613621	0.148138	-0.211372	-0.555321	-0.510357	28		MCRIP1..348262.	0.174993	0.0370714	0.0368438	0.0625257	0.0166559	0.0245119	0.0355832	0.101748	0.250508	0.0382445	0.035847	0.396579	0.132126
UID449	RNF223..401934./299	299	299-IASMPRSPSSAGSPRSPGTPGSERVASPLEC	401934	RNF223	1.36629	0.460128	-0.198395	1.0991	0.630663	0.0682206	1.20556	-0.441464	2.2983	0.0703753	2.29385	1.38662	0.243394	0.384202	0.808537	-0.05162	-0.677268	1.65164	0.24224	-0.77391	2.44866	1.28628	-0.297118	-0.270819	-0.0461745	2.44852	0.213252	1.15653	28		RNF223..401934.	0.0193501	0.123726	0.318657	0.0466857	0.0230666	0.0390766	0.219641	0.177825	0.0810575	0.0165862	0.015851	0.0665725	0.0281896
UID450	RNF223..401934./300	300	300-VPPPRRSSSIASMPRSPSSAGSPRSPGTPGS	401934	RNF223	NA	NA	-0.0922976	1.1039	0.369572	0.034107	0.789291	-0.607051	2.1817	0.768697	1.81778	0.783211	0.246353	0.616626	0.923369	-0.712379	-0.460099	1.05552	-0.134336	-0.844565	NA	0.888811	0.0160952	0.131771	-0.150944	1.95662	NA	1.10368	24		RNF223..401934.	0.0193501	0.123726	0.318657	0.0466857	0.0230666	0.0390766	0.219641	0.177825	0.0810575	0.0165862	0.015851	0.0665725	0.0281896
UID460	AGPS..8540./304	304	304-REALSTNECKARRAASAATAAPTATPAAQES	8540	AGPS	-0.3338	-1.10768	0.0655753	-0.551831	-0.403334	-0.585336	-0.00355816	-0.656862	-0.705926	-0.477381	-0.013701	-1.40165	-0.306867	-0.780383	-0.623518	-0.833028	-0.0534269	-0.660277	-0.711914	-0.303099	-0.97942	-0.602187	-0.439275	-1.02709	-0.354287	-0.863761	-0.875796	-0.745653	28		AGPS..8540.	0.0283	0.133	0.0855	0.00733	0.0258	0.0812	0.0115	0.0841	0.0223	0.0136	0.00667	0.0223	0.0219
UID463	KIF2A..3796./307	307	307-EQSSSAQQNGSVSDISPVQAAKKEFGPPSRR	3796	KIF2A	-0.163966	-0.417382	-0.492903	NA	-0.75242	-0.073153	-0.446252	-0.0075655	0.128404	-1.0038	-0.680644	-0.190839	-0.363533	NA	-0.444117	-0.212958	-0.286659	-0.0673418	-0.0338818	0.158903	NA	NA	-0.10818	NA	-0.0881052	-0.325523	-0.372991	NA	22		KIF2A..3796.	0.0588693	0.001347	0.123311	0.0391579	0.00554036	0.0241053	0.257732	0.0257579	0.00430196	0.00490605	0.0260673	0.0226689	0.00151814
UID469	DDX39A..10212./309	309	309-AELPEEIDISTYIEQSR______________	10212	DDX39A	0.080955	-0.243792	0.134029	-0.236928	-0.573102	-0.432328	0.137208	0.15991	0.00974703	-0.384586	-0.000466347	0.142746	-0.264609	-0.00516081	-0.522518	-0.113386	-0.00460052	-0.544523	-0.0430918	0.354087	0.308664	NA	-0.316206	-0.312473	0.208513	-0.0387335	0.0528154	0.160387	27		DDX39A..10212.	0.0384202	0.094204	0.13412	0.405629	0.258247	0.185885	0.103553	0.168486	0.107301	0.116441	0.0346791	0.346568	0.0609411
UID471	DDX39A..10212./310	310	310-VVGTPGRILALVRNRSFSLKNVKHFVLDECD	10212	DDX39A	-0.0430574	-0.0202012	2.27396	NA	-0.60622	-0.611135	0.245107	-0.702512	-0.221625	0.566459	0.609836	-0.276538	1.03671	0.980149	0.28034	-0.155378	3.01119	-0.455551	-0.484376	0.200542	3.46655	-0.956347	0.590188	NA	-0.250542	-0.111871	2.05011	NA	25		DDX39A..10212.	0.0384202	0.094204	0.13412	0.405629	0.258247	0.185885	0.103553	0.168486	0.107301	0.116441	0.0346791	0.346568	0.0609411
UID472	PDLIM1..9124./311	311	311-KMLQEKQELNEPPKQSTSFLVLQEILESEEK	9124	PDLIM1	0.778392	-0.402623	NA	0.484401	NA	-0.142983	0.660954	0.348514	-0.185145	1.37778	-0.164271	2.18138	-0.34177	0.207803	0.140319	0.141947	1.74669	1.48493	0.618868	-0.226073	NA	NA	-0.256926	-0.282534	-0.371922	0.633326	-0.180609	0.920489	24		PDLIM1..9124.	0.0118278	0.0346679	0.00558306	0.0590946	0.0367883	0.0386388	0.0333663	0.0162755	0.0188028	0.0277638	0.0251388	0.0351349	0.117341
UID473	PDLIM1..9124./312	312	312-LQEKQELNEPPKQSTSFLVLQEILESEEKGD	9124	PDLIM1	1.02514	0.40688	0.077055	0.328723	0.0411372	0.469908	0.667185	0.310838	0.284067	0.877062	-0.00738001	2.18181	-0.122016	0.0788116	-0.16815	0.29164	1.86618	1.32887	0.635551	-0.0679874	2.7256	1.36521	0.351131	-0.301707	-0.375468	0.288509	0.121083	0.920474	28		PDLIM1..9124.	0.0118278	0.0346679	0.00558306	0.0590946	0.0367883	0.0386388	0.0333663	0.0162755	0.0188028	0.0277638	0.0251388	0.0351349	0.117341
UID474	PDLIM1..9124./313	313	313-HIGSAHNRSAMPFTASPASSTTARVITNQYN	9124	PDLIM1	1.42654	0.605884	-0.487116	0.355346	-0.259227	0.603264	0.482398	0.429332	0.44153	0.0169892	-0.232947	2.21031	0.222154	0.377644	-0.00546741	-0.192222	0.291704	1.43457	0.701579	-0.342305	-0.157018	1.6052	0.246633	-0.315293	-0.281698	0.261816	0.0222945	0.775957	28		PDLIM1..9124.	0.0118278	0.0346679	0.00558306	0.0590946	0.0367883	0.0386388	0.0333663	0.0162755	0.0188028	0.0277638	0.0251388	0.0351349	0.117341
UID478	PDLIM1..9124./314	314	314-DNLTLTVARSEHKVWSPLVTEEGKRHPYKMN	9124	PDLIM1	2.31076	0.088607	-0.540237	0.85232	-0.0633138	0.512554	0.676489	0.924873	1.1245	0.319295	-0.0284047	2.44765	0.296175	0.819051	0.328173	0.137304	1.4824	2.62581	1.56708	-1.43244	1.15567	1.70586	0.779344	-0.993275	-0.751748	0.851938	0.11621	1.99585	28		PDLIM1..9124.	0.0118278	0.0346679	0.00558306	0.0590946	0.0367883	0.0386388	0.0333663	0.0162755	0.0188028	0.0277638	0.0251388	0.0351349	0.117341
UID479	ACOT7..11332./315	315	315-ADPVVDSSQKRYRAASAFFTYVSLSQEGRSL	11332	ACOT7	0.0732632	0.516768	NA	0.401813	NA	0.126288	0.347807	-0.433357	-0.303347	-0.0442162	-0.0833635	0.507795	-0.176056	-0.0563974	0.292034	0.655938	-0.101642	-0.0529447	0.199773	0.451311	NA	NA	0.349596	0.280643	0.0287256	0.0289431	0.57561	0.216105	24		ACOT7..11332.	0.0196494	0.014525	0.0158516	0.0523301	0.019309	0.0263558	0.0113511	0.0105057	0.00871176	0.0207993	0.00662594	0.0469365	0.016316
UID482	MYO1C..4641./317	317	317-LVGKINRSLASKDVESPSWRSTTVLGLLDIY	4641	MYO1C	0.655571	-0.688147	0.183948	-0.0262606	0.131527	-0.384655	0.303409	0.278258	0.887278	0.740381	-0.664241	0.191995	0.00612593	-0.330373	0.336245	-0.0663789	-0.256353	0.150191	0.211197	-0.259368	-0.981548	0.0770245	-0.361639	0.467423	-0.279872	-0.289816	-0.232643	0.21068	28		MYO1C..4641.	0.300664	0.0490868	0.0183958	0.130284	0.0664684	0.0480681	0.0322285	0.0213214	0.228675	0.0322335	0.0654939	0.0325537	0.0230802
UID484	MYO1C..4641./319	319	319-ELCIKNMVWKYCRSISPEWKQQLQQKAVASE	4641	MYO1C	-0.0670234	-0.97133	-0.967751	1.17617	-0.528543	0.196836	0.0961583	-0.239261	0.31169	0.224596	-0.887649	0.299695	0.0876678	-0.828447	0.21012	0.296469	-1.1989	-0.332528	-0.713674	0.419266	-0.643095	-0.212251	-0.518392	-0.554301	-1.16516	-0.879907	0.867033	-0.109583	28		MYO1C..4641.	0.300664	0.0490868	0.0183958	0.130284	0.0664684	0.0480681	0.0322285	0.0213214	0.228675	0.0322335	0.0654939	0.0325537	0.0230802
UID485	MYO1C..4641./320	320	320-LGTDEISPRVLQALGSEPIQYAVPVVKYDRK	4641	MYO1C	-0.228157	-0.492837	-0.582513	-0.0370488	-0.607689	NA	-0.119098	0.467984	NA	-0.358521	-0.721283	-0.105177	-0.173798	-0.397271	-0.163246	-0.0932817	-0.224727	NA	-0.133651	0.196213	-0.359898	-0.10181	-0.655342	0.13192	-0.433766	-0.186133	-0.221628	NA	24		MYO1C..4641.	0.300664	0.0490868	0.0183958	0.130284	0.0664684	0.0480681	0.0322285	0.0213214	0.228675	0.0322335	0.0654939	0.0325537	0.0230802
UID487	SNAP23..8773./321	321	321-DAREDEMEENLTQVGSILGNLKDMALNIGNE	8773	SNAP23	0.332074	0.344693	1.79043	0.259122	-0.0946833	-0.157859	0.445782	0.435585	-0.0967682	1.3709	0.0953202	0.229523	0.283046	-0.158877	-0.0926825	0.807906	1.89836	0.156492	0.0524502	0.257401	3.21053	0.33175	0.227942	-0.225923	-0.199284	-0.128441	0.0997949	0.203616	28		SNAP23..8773.	0.893367	0.92173	0.944821	0.96429	0.989264	0.644252	0.936969	0.949405	0.970828	0.929982	0.976824	0.895347	0.952556
UID488	SNAP23..8773./322	322	322-ESLESTRRILGLAIESQDAGIKTITMLDEQK	8773	SNAP23	NA	-0.162237	-0.0162258	-0.137968	0.0420413	-0.318832	NA	-0.12518	-0.391049	-0.185251	-0.0734806	0.20427	0.454039	-0.582095	-0.128276	1.52371	0.253764	-0.115034	0.361975	0.0682259	NA	0.0663528	-0.13862	-0.430729	0.117579	-0.0487609	NA	0.0308708	24		SNAP23..8773.	0.893367	0.92173	0.944821	0.96429	0.989264	0.644252	0.936969	0.949405	0.970828	0.929982	0.976824	0.895347	0.952556
UID489	SNAP23..8773./323	323	323-SGKAYKTTWGDGGENSPCNVVSKQPGPVTNG	8773	SNAP23	0.123863	-0.260509	0.117507	-0.410334	-0.351902	-0.093075	-0.270449	0.146133	-0.0658256	-0.971144	0.0391323	-0.531678	0.669757	0.248536	0.16225	0.0110715	-0.198211	-0.231157	0.470032	0.832759	-1.0756	-0.719137	0.357897	-0.764165	-0.326433	0.164271	-0.782992	0.0752589	28		SNAP23..8773.	0.893367	0.92173	0.944821	0.96429	0.989264	0.644252	0.936969	0.949405	0.970828	0.929982	0.976824	0.895347	0.952556
UID490	GTPBP1..9567./324	324	324-KAVGTITKLLQTTNNSPMNSKPQQIKMQSTK	9567	GTPBP1	0.420199	0.159747	0.0235259	0.122107	-0.346046	0.26443	0.0993776	-0.201969	-0.249428	0.126318	0.120974	-0.118353	-0.269626	-0.143394	0.310991	-0.0460135	0.74012	-0.152403	0.0453717	0.48493	-0.0686563	0.189033	-0.294553	0.0745875	0.181217	-0.145968	-0.738951	0.216049	28		GTPBP1..9567.	0.0510566	0.0211518	0.0139507	0.0596971	0.0383046	0.114172	0.106686	0.0347438	0.0414784	0.0398634	0.076114	0.0630034	0.0222926
UID491	GTPBP1..9567./325	325	325-NGEPELDLTSKLVLVSPTSEQYDSLLRQMWE	9567	GTPBP1	-0.187453	-0.417704	-0.0779963	0.239365	0.0411687	0.134456	NA	NA	0.159022	1.24648	NA	0.807331	NA	0.127496	0.64178	0.217625	NA	NA	NA	0.676942	0.0279202	0.329915	NA	0.383186	-0.0127144	0.211959	-0.151877	0.689497	20		GTPBP1..9567.	0.0510566	0.0211518	0.0139507	0.0596971	0.0383046	0.114172	0.106686	0.0347438	0.0414784	0.0398634	0.076114	0.0630034	0.0222926
UID493	GTPBP1..9567./326	326	326-AMDSPVPASMFAPEPSSPGAARAAAAAARLH	9567	GTPBP1	-0.00749826	-0.188599	0.0265554	-0.0412987	0.0714296	-0.211664	0.0240552	-0.202783	-0.157739	-0.0606612	0.0493662	-0.0354064	0.0284249	-0.429804	-0.0187235	-0.286769	0.350491	-0.307045	-0.390323	0.235609	0.0594362	-0.0226774	0.0734302	0.188308	0.103334	-0.236835	-0.0745346	-0.146104	28		GTPBP1..9567.	0.0510566	0.0211518	0.0139507	0.0596971	0.0383046	0.114172	0.106686	0.0347438	0.0414784	0.0398634	0.076114	0.0630034	0.0222926
UID494	GTPBP1..9567./327	327	327-MDSPVPASMFAPEPSSPGAARAAAAAARLHG	9567	GTPBP1	-0.0395303	0.412096	0.425179	-0.0216594	0.0935332	0.355358	-0.208625	-0.107266	0.207105	0.559648	0.268092	-0.318954	0.0903743	-0.555685	-0.0219269	-0.194017	0.474595	-0.0741566	-0.202257	-0.177062	0.0528615	0.279842	0.241487	-0.0468788	-0.103175	-0.00787544	-0.0681984	0.1189	28		GTPBP1..9567.	0.0510566	0.0211518	0.0139507	0.0596971	0.0383046	0.114172	0.106686	0.0347438	0.0414784	0.0398634	0.076114	0.0630034	0.0222926
UID496	STXBP3..6814./328	328	328-LLDDIKMLNKPKDKVSLIKDE__________	6814	STXBP3	-0.270453	-0.475775	-0.190729	-0.841998	-0.944018	0.0569259	-0.105623	-1.08289	0.885903	0.879545	0.863225	-0.148787	0.321544	-1.01541	0.947227	0.442697	0.608427	-0.208039	0.425778	0.590744	0.88649	0.988214	0.341437	0.295158	-0.0940673	0.434752	0.727552	0.748805	28		STXBP3..6814.	0.81108	0.431224	0.727166	0.594279	0.312436	0.118159	0.233453	0.943863	0.918629	0.289716	0.277443	0.748997	0.376587
UID497	ARVCF..421./329	329	329-AFPMVTAPLAQPERGSMGSLDRLVRRSPSVD	421	ARVCF	-0.638774	-1.75744	-1.43872	0.676501	-0.126195	-0.370691	-1.04054	1.20876	-1.36294	-0.193464	-1.27557	-0.131516	0.391649	-0.583804	-0.238658	-0.0418491	-1.52897	-1.07462	-1.5353	-1.35405	-1.05179	-0.0737667	-1.26858	-0.180895	-1.12051	0.166914	-0.0234451	-1.0393	28		ARVCF..421.	0.0174675	0.0282296	0.0108029	0.00903553	0.0238332	0.0216789	0.0370641	0.012504	0.0493627	0.00840044	0.0353764	0.0221333	0.0241775
UID498	ARVCF..421./330	330	330-MVTAPLAQPERGSMGSLDRLVRRSPSVDSAR	421	ARVCF	-0.572713	-1.2093	-1.36174	-0.317768	-0.037034	-0.118203	-1.53354	2.25102	-1.85014	-1.07374	-0.746655	-0.857211	0.418369	-0.720617	0.0366592	0.0623579	-1.97224	-0.893633	-1.37486	-1.49532	-1.17137	0.0824083	-1.01994	-0.021231	-1.35261	0.670435	-0.334924	-1.29937	28		ARVCF..421.	0.0174675	0.0282296	0.0108029	0.00903553	0.0238332	0.0216789	0.0370641	0.012504	0.0493627	0.00840044	0.0353764	0.0221333	0.0241775
UID499	ARVCF..421./331	331	331-GFPEGPEPRDSPSYGSLSRGLGMRPPRAGPL	421	ARVCF	NA	-2.45605	-1.50776	NA	-0.350304	-1.57591	-2.01746	1.49473	-2.41861	-1.53859	-1.52913	NA	0.378777	NA	-1.58038	-0.436947	-2.69987	-1.61684	-1.98264	NA	NA	NA	-1.93411	NA	NA	-0.968285	NA	NA	17		ARVCF..421.	0.0174675	0.0282296	0.0108029	0.00903553	0.0238332	0.0216789	0.0370641	0.012504	0.0493627	0.00840044	0.0353764	0.0221333	0.0241775
UID501	ARVCF..421./333	333	333-FQSAAATAKGPKGALSPGGFDDSTLPLVDKS	421	ARVCF	-0.643129	-0.472973	NA	-0.0249829	NA	NA	-0.50458	0.919368	NA	NA	-0.409876	-1.00374	0.596401	-0.312081	-0.117876	-0.538069	-0.446856	NA	-0.740673	-0.299141	-0.767883	NA	-0.726595	-0.128374	-0.646983	0.454812	-0.298829	NA	20		ARVCF..421.	0.0174675	0.0282296	0.0108029	0.00903553	0.0238332	0.0216789	0.0370641	0.012504	0.0493627	0.00840044	0.0353764	0.0221333	0.0241775
UID504	ARVCF..421./335	335	335-GYSTVDRRERRPRGASSAGEASEKEPLKLDP	421	ARVCF	-0.612376	-1.93716	-2.13317	-0.399377	-0.372655	-0.495286	NA	1.39761	-0.667904	-0.916794	-1.56284	-0.750227	0.520791	-0.575337	-1.30337	0.346992	-2.58415	-1.33402	-2.47528	-0.957042	0.0937386	-0.918552	-2.22034	-0.368874	-1.63817	-0.10269	-0.511512	-0.623055	27		ARVCF..421.	0.0174675	0.0282296	0.0108029	0.00903553	0.0238332	0.0216789	0.0370641	0.012504	0.0493627	0.00840044	0.0353764	0.0221333	0.0241775
UID506	ARVCF..421./337	337	337-PERGSMGSLDRLVRRSPSVDSARKEPRWRDP	421	ARVCF	-1.33298	-0.793469	-1.31289	0.719333	-0.026172	-0.46328	-2.12887	1.09803	-1.32335	-0.858313	-1.07127	-1.05736	0.764511	-0.885071	0.242599	-0.747482	-1.78241	-1.28176	-1.53783	-2.87218	-1.94759	-0.5623	-0.730081	-0.0762018	-1.70049	0.800861	-0.669397	-1.37145	28		ARVCF..421.	0.0174675	0.0282296	0.0108029	0.00903553	0.0238332	0.0216789	0.0370641	0.012504	0.0493627	0.00840044	0.0353764	0.0221333	0.0241775
UID507	ARVCF..421./338	338	338-RGSMGSLDRLVRRSPSVDSARKEPRWRDPEL	421	ARVCF	-1.20775	-1.53741	-1.60664	0.87456	-0.19153	-0.762077	-0.250143	0.821242	-1.53823	-1.35735	-1.08641	-2.15292	1.15691	-1.1029	0.193564	-1.3224	-1.19422	-1.29742	-1.73458	-0.610517	-2.18071	-0.988901	-1.1532	-0.0826664	-1.77142	-0.530269	-0.16468	-2.15628	28		ARVCF..421.	0.0174675	0.0282296	0.0108029	0.00903553	0.0238332	0.0216789	0.0370641	0.012504	0.0493627	0.00840044	0.0353764	0.0221333	0.0241775
UID511	C11orf58..10944./340	340	340-_MSAARESHPHGVKRSASPDDDLGSSNWEAA	10944	C11orf58	0.0885819	-0.0873774	1.20233	0.15475	0.68365	0.413668	-0.237939	0.15834	0.368311	-0.00312281	-0.234653	0.215525	0.169901	0.723047	-0.0653872	0.037652	-0.0821729	-0.0737631	-0.325389	0.190317	0.46758	0.838383	0.0100763	0.611162	0.213262	0.0353837	0.498968	0.291649	28		C11orf58..10944.	0.21089	0.0474333	0.136862	0.0421965	0.064286	0.128016	0.046161	0.0265349	0.0212695	0.0405715	0.0603292	0.105865	0.129237
UID512	C11orf58..10944./341	341	341-SAARESHPHGVKRSASPDDDLGSSNWEAADL	10944	C11orf58	-0.131474	-0.19973	0.0606276	0.114754	0.0347468	0.200401	-0.0969795	0.101031	0.145717	-0.391315	-0.0563315	-0.249773	-0.0355679	0.0623004	-0.0443144	-0.177617	-0.065304	-0.176157	-0.334139	0.0180774	-0.298603	-0.107858	0.145122	0.10099	0.541313	-0.401138	0.37553	0.0906518	28		C11orf58..10944.	0.21089	0.0474333	0.136862	0.0421965	0.064286	0.128016	0.046161	0.0265349	0.0212695	0.0405715	0.0603292	0.105865	0.129237
UID513	AP3B1..8546./342	342	342-KEGDELEDNGKNFYESDDDQKEKTDKKKKPY	8546	AP3B1	0.353829	0.31876	0.0532977	0.458575	0.503965	0.393694	0.59201	0.137735	0.237371	0.00630267	0.528768	0.0155973	0.301342	-0.324604	0.641912	0.547503	-0.307724	0.518556	0.0149959	-0.197145	-0.0682532	0.246528	0.413177	0.193916	0.0858784	0.193445	0.574037	-0.382119	28		AP3B1..8546.	0.170696	0.219029	0.344571	0.293407	0.105218	0.0580092	0.0147484	0.453202	0.485248	0.231714	0.324552	0.21375	0.262972
UID514	AP3B1..8546./343	343	343-ETSAVIIAAPQNFTPSVIFQKVVNVANVGAV	8546	AP3B1	NA	0.387776	0.547219	0.38293	0.444403	-0.0902839	NA	0.401371	0.538707	0.190313	0.393641	0.490081	0.215658	-0.0566835	0.367386	0.252705	0.271855	0.0282791	0.208098	0.520837	NA	0.768783	0.314373	0.163405	0.315485	0.446311	NA	0.275266	24		AP3B1..8546.	0.170696	0.219029	0.344571	0.293407	0.105218	0.0580092	0.0147484	0.453202	0.485248	0.231714	0.324552	0.21375	0.262972
UID515	AP3B1..8546./344	344	344-ENKRTAKRNSKAKGKSDSEDGEKENEKSKTS	8546	AP3B1	-0.771301	NA	0.0529299	0.958964	NA	0.383934	0.477679	0.358222	0.276778	1.70096	0.180402	-0.516912	0.423936	-0.262051	NA	NA	0.00735903	1.06988	0.45346	-0.657835	-0.428499	NA	1.13358	0.309834	-0.191434	NA	-0.34628	-0.525674	22		AP3B1..8546.	0.170696	0.219029	0.344571	0.293407	0.105218	0.0580092	0.0147484	0.453202	0.485248	0.231714	0.324552	0.21375	0.262972
UID519	SULT2B1..6820./346	346	346-SLEPNTSLEREPRPNSSPSPSPGQASETPHP	6820	SULT2B1	-1.05483	0.0818911	0.557959	0.0461669	-0.00271893	0.712815	-0.0482106	1.39145	0.195648	-0.0112457	0.347944	0.0406561	-1.05014	-0.20004	NA	NA	-0.695098	0.661592	1.08043	-1.10952	0.855428	0.627606	0.162696	-0.447372	-0.891385	NA	-0.741723	NA	24		SULT2B1..6820.	0.232487	0.0476623	0.0716278	0.186838	0.229736	0.100438	0.0185492	0.127106	0.0322078	0.0863433	0.113911	0.283249	0.148661
UID520	SULT2B1..6820./347	347	347-LEPNTSLEREPRPNSSPSPSPGQASETPHPR	6820	SULT2B1	-0.837519	-1.42538	0.592359	0.960893	-2.09974	0.710202	0.704594	1.35598	-0.386177	-0.953967	0.120354	0.790137	-1.41542	0.00886631	0.495631	-0.410581	-0.502882	-0.328308	0.636015	-0.606184	NA	NA	0.765556	-0.254093	-0.307027	-1.18395	0.378963	0.758129	26		SULT2B1..6820.	0.232487	0.0476623	0.0716278	0.186838	0.229736	0.100438	0.0185492	0.127106	0.0322078	0.0863433	0.113911	0.283249	0.148661
UID521	SULT2B1..6820./348	348	348-PNTSLEREPRPNSSPSPSPGQASETPHPRPS	6820	SULT2B1	-0.820114	0.123144	0.822278	0.395295	-0.842218	0.195286	0.0988712	1.0819	-0.55304	0.121833	-0.00304914	0.627353	-0.579512	-0.124115	-0.0769911	-0.616508	-0.196016	0.365782	0.763346	-1.31029	1.59687	1.58477	0.503143	-0.20121	-1.17841	-1.43163	-0.403844	0.850295	28		SULT2B1..6820.	0.232487	0.0476623	0.0716278	0.186838	0.229736	0.100438	0.0185492	0.127106	0.0322078	0.0863433	0.113911	0.283249	0.148661
UID522	SULT2B1..6820./349	349	349-TSLEREPRPNSSPSPSPGQASETPHPRPS__	6820	SULT2B1	NA	-0.397689	0.552739	0.326472	0.277309	0.214794	NA	0.635028	-0.0796866	-0.106509	-0.036787	NA	0.203689	0.435883	0.243077	0.258219	-0.304506	-0.0235288	0.262601	NA	NA	NA	0.247028	0.346291	NA	-0.436884	NA	0.310321	20		SULT2B1..6820.	0.232487	0.0476623	0.0716278	0.186838	0.229736	0.100438	0.0185492	0.127106	0.0322078	0.0863433	0.113911	0.283249	0.148661
UID524	TNFRSF10A..8797./351	351	351-YAMLMKWVNKTGRNASIHTLLDALERMEERH	8797	TNFRSF10A	-0.271391	-0.0577502	0.113936	-0.24503	0.30823	0.158614	0.311397	-0.747139	0.478019	1.58704	0.455653	-0.187915	-0.0508342	-0.711781	-0.153504	-0.198012	0.253757	0.483239	-0.170248	0.135786	-0.337825	0.00472514	-0.280441	0.358521	0.263615	-0.140761	-0.0922322	0.326562	28		TNFRSF10A..8797.	0.0248	0.0807	0.0157	0.0731	0.0167	0.0485	0.193	0.0514	0.0384	0.0431	0.00624	0.212	0.0464
UID525	NFKBIE..4794./352	352	352-LPESTSAPASGPSDGSPQPCTHPPGPVKEPQ	4794	NFKBIE	-0.496908	NA	NA	-0.441283	0.595785	-0.319946	-0.728494	-0.296077	-0.853687	NA	NA	-1.50553	-0.503747	-0.868777	0.0135946	-0.981613	NA	NA	NA	-0.0467157	-1.07586	-0.592782	NA	-0.278095	-0.238055	0.272642	-1.01413	-0.51461	20		NFKBIE..4794.	0.601563	0.743607	0.481617	0.670576	0.571099	0.56732	0.586062	0.409375	0.483675	0.392914	0.592225	0.343326	0.352545
UID526	PSMD11..5717./353	353	353-__MAAAAVVEFQRAQSLLSTDREASIDILHS	5717	PSMD11	0.680741	0.075032	-0.631617	0.0998363	-0.298407	-0.0338249	-0.0512724	0.255086	-0.104471	0.555529	0.22771	-0.425651	0.070015	-0.0183201	-0.18691	-1.01287	0.641189	-0.322131	-0.271368	0.322574	NA	NA	-0.0902054	0.354233	0.373412	-0.301153	-0.0120344	-0.47563	26		PSMD11..5717.	0.997701	0.972111	0.8583	0.963339	0.999998	1	0.976152	0.999595	0.998601	0.974113	0.999998	1	0.984398
UID527	PSMD11..5717./354	354	354-EFQRAQSLLSTDREASIDILHSIVKRDIQEN	5717	PSMD11	2.94581	0.639738	-0.652276	0.935671	-0.104923	-0.544901	-0.776671	0.0376387	-0.283075	-0.716296	0.84221	-0.545379	0.830658	1.01213	0.573819	-1.1208	-0.992836	0.127507	-0.280491	-0.910159	0.070535	0.887398	0.465881	-0.0502256	-0.235993	1.03635	1.35126	-0.13663	28		PSMD11..5717.	0.997701	0.972111	0.8583	0.963339	0.999998	1	0.976152	0.999595	0.998601	0.974113	0.999998	1	0.984398
UID528	PSMD12..5718./355	355	355-EAASILQELQVETYGSMEKKERVEFILEQMR	5718	PSMD12	0.0296671	-0.23405	0.249806	-0.103509	-0.3938	-0.0453186	-0.149353	0.0151186	-0.0294442	-0.116509	-0.167704	-0.0439129	-0.162094	0.221927	0.0557203	-0.287561	0.0210009	0.346869	-0.534991	0.237204	1.24165	-0.0799437	-0.27513	0.330591	0.0170617	-0.0360556	0.11661	-0.29556	28		PSMD12..5718.	0.99849	0.952215	0.961843	0.975872	0.98317	0.974455	0.983181	0.986676	0.989168	0.993318	0.958516	0.999235	0.98532
UID533	MEN1..4221./356	356	356-GEEAREGRRRGPRRESKPEEPPPPKKPALDK	4221	MEN1	0.907995	-0.221538	-0.392074	-0.492254	-0.287469	-0.121369	0.0249796	-0.105989	0.632098	1.68581	0.156592	0.304857	-0.441864	0.248152	-0.44794	0.365685	0.683681	0.422646	0.114158	0.0498998	0.927224	-0.398373	-0.503017	0.159212	0.0810852	0.358628	-0.0996296	0.0489521	28		MEN1..4221.	0.0537	0.913	0.283	0.564	0.597	0.411	0.742	0.78	0.194	0.853	0.0443	0.461	0.354
UID534	CBX4..8535./357	357	357-HAVGLNLSHVRKRCLSETHGEREPCKKRLTA	8535	CBX4	0.654382	-0.0339144	1.02681	-0.401741	0.716041	0.25684	0.667078	0.0188894	-0.297375	1.38439	0.552392	0.578003	-0.181563	0.339339	0.271138	0.474867	0.873926	0.516788	-0.285531	0.915328	0.596253	-0.258689	-0.33621	-0.362215	0.130184	-0.177176	0.403498	0.328235	28		CBX4..8535.	0.0959268	0.0080055	0.0731757	0.0302604	0.0251919	0.0940687	0.136103	0.0641223	0.0412886	0.00559768	0.0941689	0.0992949	0.0679444
UID535	CBX4..8535./358	358	358-KMYDLQYQGGHKEAPSPTCPDLGAKSHPPDK	8535	CBX4	0.73014	-0.0727201	0.551131	-0.63385	0.274236	0.294457	-0.129622	-0.126275	-0.354459	NA	-0.11547	-0.209112	-0.0956817	-0.33485	0.0665016	-0.0783758	0.476206	0.109247	-0.238508	0.198535	-0.266487	-0.0440464	-0.448888	-0.0893822	0.291699	0.441304	-0.25501	0.100233	27		CBX4..8535.	0.0959268	0.0080055	0.0731757	0.0302604	0.0251919	0.0940687	0.136103	0.0641223	0.0412886	0.00559768	0.0941689	0.0992949	0.0679444
UID537	PGRMC1..10857./360	360	360-HVGKLLKEGEEPTVYSDEEEPKDESARKND_	10857	PGRMC1	-0.146348	0.599095	-0.217566	0.604551	-0.177176	-0.387247	-0.175055	0.0468779	0.293643	-1.09744	0.17919	0.524418	0.224469	0.103479	-0.195039	-0.514146	0.163176	-0.0718354	0.377032	-0.120216	0.778159	0.0831951	-0.198733	-0.0571206	0.0817572	0.447201	0.0138596	0.737083	28		PGRMC1..10857.	0.0555245	0.0412252	0.0704706	0.0264046	0.0310634	0.0920003	0.110653	0.033899	0.0406865	0.021727	0.00186043	0.00618251	0.00467279
UID538	PGRMC1..10857./361	361	361-LYKIVRGDQPAASGDSDDDEPPPLPRLKRRD	10857	PGRMC1	0.138322	0.314494	-0.122396	0.208611	0.0327193	-0.0990138	-0.0066932	0.196467	0.263287	-0.499912	0.177593	0.15752	0.118292	0.0217781	0.00174236	-0.134989	0.1154	0.0930454	0.00801881	0.251489	0.949368	0.01126	0.369476	-0.0166454	0.0168591	-0.0190201	0.175562	0.118074	28		PGRMC1..10857.	0.0555245	0.0412252	0.0704706	0.0264046	0.0310634	0.0920003	0.110653	0.033899	0.0406865	0.021727	0.00186043	0.00618251	0.00467279
UID540	SUPT5H..6829./362	362	362-PRDVTNFTVGGFAPMSPRISSPMHPSAGGQR	6829	SUPT5H	-0.12259	0.0493932	-0.0116075	0.10781	-0.0690962	-0.069715	-0.209837	0.00417678	-0.159606	-0.26351	-0.0233776	-0.00501537	0.0211388	0.00311406	-0.073837	-0.094862	-0.0636242	0.0870004	-0.229751	-0.0465652	-0.205308	-0.323058	0.0771775	-0.00310198	0.301821	0.0446122	-0.0569291	-0.0595767	28		SUPT5H..6829.	0.968357	1	0.946812	0.993823	0.978633	0.996335	0.993081	0.984205	0.913469	0.999937	1	0.787384	0.981828
UID542	SUPT5H..6829./364	364	364-NFTVGGFAPMSPRISSPMHPSAGGQRGGFGS	6829	SUPT5H	0.000692526	0.433031	0.531845	0.476096	0.0639267	0.227909	0.0922375	0.203946	0.0890807	0.805451	0.275691	-0.462967	0.581507	0.0613604	0.623164	0.318541	0.779761	0.274157	0.368329	0.106956	0.871674	0.484762	0.68169	0.0798454	0.130736	-0.0723327	0.167764	0.54749	28		SUPT5H..6829.	0.968357	1	0.946812	0.993823	0.978633	0.996335	0.993081	0.984205	0.913469	0.999937	1	0.787384	0.981828
UID543	TAF4..6874./365	365	365-RARPGGGGPQRPGPPSPRRPLVPAGPAPPAA	6874	TAF4	0.665746	0.0328848	-0.188926	-0.976434	-0.137662	-0.35862	-0.509257	0.328766	-0.106592	0.143675	0.246897	-0.0236845	-0.236871	-0.627694	-0.462754	-0.150489	0.379015	0.138485	0.23635	0.63441	NA	-0.454083	-0.141126	-0.516396	0.0413537	0.390268	-0.183912	-0.487411	27		TAF4..6874.	0.0643406	0.0681506	0.441943	0.366242	0.23532	0.247762	0.176409	0.042717	0.0319363	0.251084	0.462809	0.464576	0.187905
UID549	TAF4..6874./366	366	366-LNSSPQPYLVPFLKRSLPALRQLTPDSAAFI	6874	TAF4	0.340798	0.802333	0.443498	0.463244	0.63263	0.942242	0.251881	NA	0.280939	0.462512	0.725889	-0.116339	NA	0.82023	-0.0383134	-0.205691	0.294729	NA	0.188452	0.567361	-0.00553703	0.00184123	0.45287	0.701317	0.453376	0.138961	0.257956	0.0487409	25		TAF4..6874.	0.0643406	0.0681506	0.441943	0.366242	0.23532	0.247762	0.176409	0.042717	0.0319363	0.251084	0.462809	0.464576	0.187905
UID550	TAF4..6874./367	367	367-SQAQTTVQPSATLQRSPGVQPQLVLGGAAQT	6874	TAF4	0.0341306	0.177104	-0.0919669	0.0117892	-0.115449	0.0412234	0.0903893	-0.0837879	-0.154433	-0.131243	0.0873446	0.101132	-0.0283473	-0.0712306	-0.170226	-0.136209	-0.128991	-0.17428	0.0475849	0.403259	-0.140315	0.180898	-0.0121783	-0.0461683	0.165844	0.0746644	0.184247	-0.0638119	28		TAF4..6874.	0.0643406	0.0681506	0.441943	0.366242	0.23532	0.247762	0.176409	0.042717	0.0319363	0.251084	0.462809	0.464576	0.187905
UID552	DFFA..1676./369	369	369-TQSLHSLRSISASKASPPGDLQNPKRARQDP	1676	DFFA	0.544082	0.614659	0.0901095	0.0238538	0.152192	0.513799	-0.041316	-0.0395727	0.0397849	-0.0541355	-0.609597	-0.93376	0.100794	0.69496	0.119016	-0.727341	0.00334469	-1.06852	-0.177521	0.0241714	-0.0687752	0.0617094	0.709028	0.640853	0.116442	0.162076	0.0685363	-0.597054	28		DFFA..1676.	0.0777	0.0288	0.0667	0.0917	0.0159	0.00871	0.0587	0.0047	0.1	0.00633	0.000375	0.0062	0.00912
UID553	DFFA..1676./370	370	370-GEEVDAVDTGISRETSSDVALASHILTALRE	1676	DFFA	0.585725	-0.103166	0.384606	0.15742	0.120425	-0.0153754	0.230824	-0.142571	0.0971458	2.25704	-0.203555	-0.344836	-0.13571	0.565076	-0.322241	-0.394831	0.218664	-0.193434	-0.146214	-0.0405052	0.253891	0.193551	-0.0958957	0.623067	-0.198528	0.199599	0.351279	-0.367249	28		DFFA..1676.	0.0777	0.0288	0.0667	0.0917	0.0159	0.00871	0.0587	0.0047	0.1	0.00633	0.000375	0.0062	0.00912
UID555	DFFA..1676./371	371	371-LTALREKQAPELSLSSQDLELVTKEDPKALA	1676	DFFA	1.2605	0.117385	0.912169	-0.435195	-0.0701723	0.312294	0.0738042	0.082715	-0.000879288	0.349409	0.158066	0.514493	0.647075	1.01607	-0.453389	-0.213504	0.610776	0.169297	0.33534	-0.0200017	1.05656	0.554893	0.263361	0.181452	0.137004	0.430353	0.245431	NA	27		DFFA..1676.	0.0777	0.0288	0.0667	0.0917	0.0159	0.00871	0.0587	0.0047	0.1	0.00633	0.000375	0.0062	0.00912
UID561	TULP1..7287./373	373	373-KGSGEADKDPSGSPASARKSPAAMFLVGEGS	7287	TULP1	0.896455	2.38636	-3.32656	-2.35063	0.483941	1.80854	0.70951	-0.356234	0.917416	-3.49463	1.01742	-0.246723	0.455221	0.781625	0.681188	2.84166	-0.331993	-2.27346	1.02643	-2.35302	0.475729	0.0477409	-1.76714	1.23492	-2.01182	0.718273	1.53067	-2.15815	28		TULP1..7287.	0.076497	0.104956	0.325684	0.0751805	0.0887525	0.109292	0.0281116	0.0354529	0.0397194	0.0363106	0.256613	0.213129	0.0971334
UID564	CLIC1..1192./374	374	374-DNYLTSPLPEEVDETSAEDEGVSQRKFLDGN	1192	CLIC1	-0.00814939	-0.0580816	0.120397	-0.0125734	-0.120547	-0.00368929	0.233516	0.00836436	0.0477904	0.0963888	0.0364366	0.175486	0.128503	0.1989	0.571022	0.207396	0.17416	0.0147917	0.123915	0.0582995	0.434887	0.0858402	0.498486	0.00534534	0.0349526	-0.0952826	0.40954	0.31232	28		CLIC1..1192.	0.0382881	0.0440168	0.00987404	0.0366658	0.0348688	0.0369163	0.00779555	0.01334	0.0295936	0.0558874	0.0108617	0.0221394	0.0767236
UID566	EIF3F..8665./376	376	376-DTERIGVDLIMKTCFSPNRVIGLSSDLQQVG	8665	EIF3F	0.573058	-0.610382	0.0828463	-0.452758	-0.0627937	0.458544	0.635393	-0.0525719	-1.06488	-0.370374	-0.487463	0.760364	-0.936967	0.36101	-0.695416	1.04722	-0.563155	1.25731	-0.269576	-0.159264	-0.556338	-0.665355	-0.738335	-1.46936	0.317921	-1.40834	-0.474751	0.675862	28		EIF3F..8665.	0.999065	1	0.995031	0.990765	0.96786	0.970637	0.934868	0.997412	0.999979	0.999792	1	0.888954	0.985105
UID567	WWP2..11060./377	377	377-HSGASARTTPATGEQSPGARSRHRQPVKNSG	11060	WWP2	-0.572539	0.960262	-0.1959	-0.485918	-0.268358	-0.144568	-0.042915	-0.152909	-0.255229	-0.866077	0.565708	-0.986844	0.51316	-0.0721674	-0.175808	-0.476704	-0.365125	0.165008	0.0397889	0.00213257	-0.576967	-0.594155	0.252528	-0.399025	1.29641	-0.410773	-0.513349	0.0793629	28		WWP2..11060.	0.0359292	0.0515915	0.013612	0.120879	0.0514931	0.18417	0.144265	0.0410083	0.0790783	0.0655216	0.0175027	0.0562658	0.0937876
UID569	ARNTL..406./378	378	378-SLGTSGVDCNRKRKGSSTDYQESMDTDKDDP	406	ARNTL	-0.0871999	-0.65201	0.369988	-1.15487	1.09356	-0.370444	-0.496915	0.012372	0.293508	-0.504842	-0.0181699	0.168081	-0.939938	0.326444	NA	NA	0.371991	-0.0128574	-0.339328	-0.458376	0.196576	0.727315	-0.20916	-0.132183	-0.329785	NA	0.516406	NA	24		ARNTL..406.	0.0547	0.0496	0.04	0.227	0.189	0.105	0.122	0.0533	0.0164	0.125	0.00677	0.0215	0.0566
UID571	WASL..8976./380	380	380-EGAQLKKVEQNSRPVSCSGRDALLDQIRQGI	8976	WASL	1.05078	0.247759	-1.57727	0.122438	-0.260424	-0.233638	-0.206853	0.559205	-0.511429	0.728275	-0.155912	-0.804425	-0.599128	-0.981114	-0.291277	2.08935	-1.21125	1.58324	0.243029	-0.573449	-1.20845	1.33868	-0.132289	-0.649207	-1.72118	0.528288	-0.285356	-0.15345	28		WASL..8976.	0.00778379	0.152205	0.0285156	0.0742567	0.121028	0.279169	0.0468051	0.288072	0.058085	0.0562817	0.211429	0.0214334	0.0772897
UID572	WASL..8976./381	381	381-AQLKKVEQNSRPVSCSGRDALLDQIRQGIQL	8976	WASL	1.12078	0.201721	NA	NA	NA	NA	-0.143273	NA	NA	NA	-0.35802	-0.338017	NA	NA	-0.507157	2.25486	-0.579936	NA	0.30549	-0.226304	NA	NA	-0.0634069	NA	-0.796956	0.32063	-0.215563	NA	14		WASL..8976.	0.00778379	0.152205	0.0285156	0.0742567	0.121028	0.279169	0.0468051	0.288072	0.058085	0.0562817	0.211429	0.0214334	0.0772897
UID573	FOXN3..1112./382	382	382-DTLPLKKRRTEKPPESDDEEMKEAAGSLLHL	1112	FOXN3	-0.025819	-0.316098	-1.52565	-0.493016	-0.536038	-0.465902	0.0877481	-0.644294	-0.286124	-0.350579	-0.658157	-1.2451	0.0449274	-0.883181	-0.496494	0.194614	0.546583	-0.202943	-0.612885	-0.780906	-0.893969	-0.348452	-0.590302	0.417301	-0.727454	-0.513567	-0.922413	-0.772062	28		FOXN3..1112.	0.0237782	0.0129893	0.0631555	0.0151773	0.0262671	0.0128372	0.0442407	0.067621	0.0352237	0.0183822	0.0219001	0.0201196	0.0179935
UID577	IPO5..3843./384	384	384-QVKRQDEDYDEQVEESLQDEDDNDVYILTKV	3843	IPO5	-0.352342	-0.363554	0.150252	NA	-0.0502062	0.20673	-0.358598	-0.462969	-0.531017	-0.200298	-0.370532	0.584521	-0.243055	-0.249542	-0.509918	0.136587	0.0966256	-0.429804	-0.0317769	-0.50772	-0.364521	-0.20772	-0.157928	NA	0.0136843	-0.0403204	0.681655	NA	25		IPO5..3843.	0.455588	0.273256	0.612435	0.0733282	0.321732	0.0543083	0.0934591	0.576925	0.241988	0.281596	0.285725	0.0379099	0.218921
UID581	EEF2K..29904./386	386	386-KWNLLNSSRLHLPRASAVALEVQRLNALDLE	29904	EEF2K	0.19269	-0.361905	0.224721	0.163414	-0.335173	0.0806441	0.0182187	-0.0467591	0.142506	-0.179127	-0.0683408	0.911074	0.208732	-0.279657	0.223555	0.211738	2.94657	0.0963864	0.00897884	0.000632048	1.85595	0.0474877	0.0860209	0.410061	0.123025	0.163085	0.0248736	NA	27		EEF2K..29904.	0.0125439	0.00930146	0.00432978	0.0172427	0.0234731	0.0489298	0.0340104	0.0167203	0.0277275	0.0224029	0.0170788	0.0178865	0.0202281
UID582	EEF2K..29904./387	387	387-DNHRESENSGDSGYPSEKRGELDDPEPREHG	29904	EEF2K	1.00514	-0.745153	1.64271	-0.0118554	0.440838	0.269441	-0.306222	-0.413433	1.10985	0.580877	0.948849	-0.373071	0.229667	0.619701	1.49321	-0.231313	3.3547	0.403437	1.21256	0.139716	2.39522	1.04404	0.792259	1.04578	0.419084	0.699183	1.92638	0.545309	28		EEF2K..29904.	0.0125439	0.00930146	0.00432978	0.0172427	0.0234731	0.0489298	0.0340104	0.0167203	0.0277275	0.0224029	0.0170788	0.0178865	0.0202281
UID583	EEF2K..29904./388	388	388-EPREHGHSYSNRKYESDEDSLGSSGRVCVEK	29904	EEF2K	0.218046	-1.26813	-1.49354	-1.89023	0.909984	-0.268281	-1.30583	0.164741	0.280157	-1.55865	0.403762	-1.14866	-0.561077	0.450187	-0.670029	-0.331871	-0.58577	-0.135485	-0.053291	0.518866	-1.30461	-0.774688	-0.915503	0.191393	-0.00171153	-0.305111	-0.528639	-0.214657	28		EEF2K..29904.	0.0125439	0.00930146	0.00432978	0.0172427	0.0234731	0.0489298	0.0340104	0.0167203	0.0277275	0.0224029	0.0170788	0.0178865	0.0202281
UID584	EEF2K..29904./389	389	389-HGHSYSNRKYESDEDSLGSSGRVCVEKWNLL	29904	EEF2K	0.0680835	-0.650163	1.61707	-0.920685	0.276321	-0.347898	-0.75164	-0.295107	0.416016	0.468219	0.453287	-0.672771	0.236035	0.351872	0.36299	-0.112743	2.98426	-0.349295	0.392076	0.0880985	2.15669	0.272807	0.0363278	0.926002	-0.224076	0.104559	1.46512	0.23329	28		EEF2K..29904.	0.0125439	0.00930146	0.00432978	0.0172427	0.0234731	0.0489298	0.0340104	0.0167203	0.0277275	0.0224029	0.0170788	0.0178865	0.0202281
UID585	EEF2K..29904./390	390	390-SYSNRKYESDEDSLGSSGRVCVEKWNLLNSS	29904	EEF2K	0.0206571	NA	1.22909	-0.0377972	-0.135026	-0.0743926	-0.287384	-0.000935555	0.372071	NA	0.502979	0.0439272	0.218786	0.368769	0.0265827	0.0945759	2.64465	0.547472	0.280904	-0.167417	2.28375	0.0624332	-0.185834	0.494672	-0.0668435	-0.208354	1.01525	0.0750494	26		EEF2K..29904.	0.0125439	0.00930146	0.00432978	0.0172427	0.0234731	0.0489298	0.0340104	0.0167203	0.0277275	0.0224029	0.0170788	0.0178865	0.0202281
UID587	EEF2K..29904./391	391	391-DEDLIFRLEGVDGGQSPRAGHDGDSDGDSDD	29904	EEF2K	-0.424298	-0.90697	-0.354315	-1.34072	0.322161	-0.313135	-1.0591	-0.150325	-0.195199	-0.387462	0.215382	-1.12315	-0.394024	-0.00831286	-0.28118	-0.329632	0.839905	-0.124106	0.0782067	0.0238922	-0.208797	-0.592323	-0.729198	-0.128606	-0.108578	-0.213857	-0.407516	-0.332989	28		EEF2K..29904.	0.0125439	0.00930146	0.00432978	0.0172427	0.0234731	0.0489298	0.0340104	0.0167203	0.0277275	0.0224029	0.0170788	0.0178865	0.0202281
UID588	EEF2K..29904./392	392	392-RGTEEKCGSPQVRTLSGSRPPLLRPLSENSG	29904	EEF2K	0.628747	NA	NA	-1.03879	NA	-0.622697	0.0663528	0.449228	-0.345827	-1.30844	NA	0.0801983	-0.360041	0.734113	NA	NA	NA	-0.213334	NA	0.999224	0.241821	NA	NA	-0.0700164	0.134414	NA	0.387418	0.080348	17		EEF2K..29904.	0.0125439	0.00930146	0.00432978	0.0172427	0.0234731	0.0489298	0.0340104	0.0167203	0.0277275	0.0224029	0.0170788	0.0178865	0.0202281
UID592	IGF2BP3..10643./394	394	394-NLKKIEQDTDTKITISPLQELTLYNPERTIT	10643	IGF2BP3	0.668089	0.408742	0.0743551	-0.294428	0.0834131	-0.153288	0.164895	0.372232	-0.0575868	0.378281	0.326065	0.882622	0.127655	0.184507	0.304451	0.256426	0.931134	0.154759	-0.112904	0.466393	1.62568	-0.112245	0.321447	0.287191	0.380828	0.212899	0.962922	0.358406	28		IGF2BP3..10643.	0.103	0.0723	0.0893	0.031	0.0168	0.11	0.02	0.0663	0.0671	0.0525	0.00395	0.0676	0.0645
UID593	IGF2BP3..10643./395	395	395-RGRRGLGQRGSSRQGSPGSVSKQKPCDLPLR	10643	IGF2BP3	1.86466	0.937313	-0.68212	-0.511588	0.084645	0.57723	-0.133854	0.426871	0.480248	0.582363	-0.0150158	0.660776	0.64084	-1.02314	-0.869529	1.17585	1.30985	1.12504	0.521983	-0.120389	0.796698	0.436232	-1.73896	-1.09638	0.524332	1.16813	0.824378	0.809442	28		IGF2BP3..10643.	0.103	0.0723	0.0893	0.031	0.0168	0.11	0.02	0.0663	0.0671	0.0525	0.00395	0.0676	0.0645
UID594	DNM1L..10059./396	396	396-LLAEEKSKPIPIMPASPQKGHAVNLLDVPVP	10059	DNM1L	0.248859	0.371239	-0.0941658	0.202011	0.013806	-0.219509	0.0217702	-0.414512	-0.152813	0.20654	0.542125	0.656341	-0.368499	0.552507	-0.0764151	-0.213853	0.208788	-0.4223	0.0755192	0.421695	-0.120178	-0.0689116	0.0786646	0.367634	0.158589	0.349704	-0.69489	0.320868	28		DNM1L..10059.	0.782592	0.474765	0.489321	0.868993	0.320098	0.96421	0.549488	0.827435	0.499127	0.734992	0.47767	0.104692	0.50589
UID595	PIK3C2A..5286./397	397	397-EKLTQAELEKLLLDDSFETKKTPVLPVTPIL	5286	PIK3C2A	0.64176	-0.929498	NA	-0.564571	NA	-0.197276	-0.580935	0.116281	0.0902524	-0.817876	-0.283361	0.368749	-0.220064	-0.0989141	-0.358239	-0.0776882	0.0109568	0.355441	-0.25097	-0.234722	NA	NA	-0.353743	-0.425513	-0.212418	-0.0101805	-0.254268	0.152226	24		PIK3C2A..5286.	0.0215198	0.184576	0.0173458	0.0353649	0.00855876	0.0226232	0.0750422	0.0908004	0.0160661	0.00787833	0.0135609	0.0189836	0.0428747
UID598	PIK3C2A..5286./399	399	399-VNGKSLSVATVTRSQSLNIRTTQLAKAQGHI	5286	PIK3C2A	0.309281	-2.46793	-0.602402	-1.58054	-1.27185	-0.487151	-0.741622	0.153782	-1.07215	0.0952741	-0.717963	0.523835	-0.295952	-0.951429	-1.14615	-0.812682	-0.731025	0.144894	-0.673891	0.522556	-0.707404	0.38409	-0.722609	-0.896626	-0.672745	-1.20269	-0.432503	-0.309495	28		PIK3C2A..5286.	0.0215198	0.184576	0.0173458	0.0353649	0.00855876	0.0226232	0.0750422	0.0908004	0.0160661	0.00787833	0.0135609	0.0189836	0.0428747
UID599	PIK3C2A..5286./400	400	400-TDLEITDSKVSNLQVSPKSEDISKFDWLDLD	5286	PIK3C2A	0.688342	-0.652792	0.200207	-1.34825	0.156919	-0.461089	0.0130924	-0.284771	0.295062	1.55171	-0.123031	0.337708	-0.338028	-0.356838	-0.287829	0.19717	-0.240794	0.117242	-0.258431	0.991828	-0.132194	0.633688	-0.583241	-0.468526	-0.236591	-0.830887	0.278615	0.59554	28		PIK3C2A..5286.	0.0215198	0.184576	0.0173458	0.0353649	0.00855876	0.0226232	0.0750422	0.0908004	0.0160661	0.00787833	0.0135609	0.0189836	0.0428747
UID600	PLK4..10733./401	401	401-SVSKRSGGGENEERYSPTDNNANIFNFFKEK	10733	PLK4	0.0759335	-0.573599	-0.250808	-0.276694	0.630626	0.154043	-0.192235	0.195714	0.110006	0.150694	-0.463817	0.924892	-0.489559	0.0380507	-0.341778	0.280177	-0.0302606	0.846246	-0.431401	0.671098	NA	-0.190081	-0.370153	-0.245884	-0.236822	0.288125	-0.295762	0.0926425	27		PLK4..10733.	0.965813	0.927057	0.907083	0.966985	0.978094	0.95573	0.936416	0.999944	0.917299	0.976929	0.961101	0.83151	0.995095
UID601	IFRD1..3475./402	402	402-__MPKNKKRNTPHRGSSAGGGGSGAAAATAA	3475	IFRD1	NA	NA	NA	-0.202711	-0.141122	0.455894	NA	0.186987	0.226594	0.589733	NA	-0.0255003	0.0427628	-0.0207434	-0.0180788	-0.220736	NA	0.213965	NA	-0.331367	NA	-0.235841	NA	-0.179891	-0.251055	-0.21804	NA	-0.00885868	18		IFRD1..3475.	0.0413	0.0407	0.147	0.0589	0.0816	0.0603	0.00321	0.0226	0.0685	0.0439	0.0107	0.0457	0.0661
UID602	IFRD1..3475./403	403	403-_MPKNKKRNTPHRGSSAGGGGSGAAAATAAT	3475	IFRD1	-0.143961	0.208878	-0.215806	-0.202711	-0.141122	0.398884	0.214066	0.15416	0.26759	0.589733	0.322057	0.0400968	0.0839999	-0.0207434	-0.011025	-0.134278	0.523207	0.247344	-0.16168	-0.30753	NA	-0.235841	0.171417	-0.179891	-0.157978	-0.158664	0.759078	-0.00885868	27		IFRD1..3475.	0.0413	0.0407	0.147	0.0589	0.0816	0.0603	0.00321	0.0226	0.0685	0.0439	0.0107	0.0457	0.0661
UID603	PIK3R2..5296./404	404	404-GATFGPLLLRAPPPPSSPPPGGAPDGSEPSP	5296	PIK3R2	-0.0902314	-0.0905363	0.0905069	-0.56889	1.16469	-0.353715	-0.00305144	-0.64711	0.126538	0.792875	-0.142461	-0.0471341	-0.255843	-0.454307	0.016737	1.55375	-0.347034	-0.198578	0.245176	0.843099	-0.0586011	-0.448767	-0.137537	0.251534	-0.23665	-0.563054	-0.418774	-0.51061	28		PIK3R2..5296.	0.0679342	0.387691	0.0184953	0.0913996	0.163709	0.0933946	0.0341688	0.161754	0.0226042	0.141141	0.0213791	0.14714	0.0139511
UID604	PIK3R2..5296./405	405	405-ATFGPLLLRAPPPPSSPPPGGAPDGSEPSPD	5296	PIK3R2	-0.215703	-0.0671651	-0.1594	-0.502655	1.26574	-0.210567	0.123803	NA	0.0273314	0.781432	-0.237103	-0.0901165	NA	-0.603545	-0.0599794	1.45419	-0.420914	NA	-0.162095	0.791443	-0.211466	-0.404875	-0.205754	0.165514	-0.39585	-0.487567	-0.247696	-0.5714	25		PIK3R2..5296.	0.0679342	0.387691	0.0184953	0.0913996	0.163709	0.0933946	0.0341688	0.161754	0.0226042	0.141141	0.0213791	0.14714	0.0139511
UID605	GOLIM4..27333./406	406	406-RHEPREQGPREADPESEADRAAVEDINPADD	27333	GOLIM4	0.986068	-0.26563	-0.27309	0.246294	0.550942	-0.386517	0.435484	NA	0.170156	0.918823	0.487961	0.481547	NA	NA	-0.0616614	3.57722	4.14219	0.0711479	0.0408759	-0.296856	NA	1.22513	1.41908	1.10946	-0.407023	0.373055	-0.257674	0.248722	24		GOLIM4..27333.	0.0678848	0.107774	0.0232322	0.109972	0.0294592	0.0565933	0.0612646	0.056482	0.0718121	0.038066	0.00875972	0.00802731	0.00983969
UID606	GOLIM4..27333./407	407	407-VREENLPDENEEQKQSNQKQENTEVEEHLVM	27333	GOLIM4	2.59476	0.200811	-1.11447	0.321123	0.125983	-0.974524	0.594393	-1.03301	-1.48482	1.26197	-1.85444	2.41133	-0.975983	1.47318	NA	NA	2.36369	-1.26329	-1.97627	-0.436016	-0.712041	2.19432	3.31584	1.48403	-0.39494	NA	0.343364	-0.781494	25		GOLIM4..27333.	0.0678848	0.107774	0.0232322	0.109972	0.0294592	0.0565933	0.0612646	0.056482	0.0718121	0.038066	0.00875972	0.00802731	0.00983969
UID607	MEIS1..4211./408	408	408-MPIDLVIDDREGGSKSDSEDITRSANLTDQP	4211	MEIS1	0.0708543	0.61381	-0.0461531	-2.42909	-1.52314	-2.37654	-2.0152	-1.01151	-1.96944	-0.680824	-1.45738	-3.36661	0.208853	-1.26502	-2.78998	-0.349088	3.31713	-1.32633	-0.945238	-3.40947	-1.119	-0.81184	-1.93098	-2.58181	0.0341371	-0.0702305	-0.393581	-2.91364	28		MEIS1..4211.	0.046547	0.0590117	0.00553661	0.059222	0.0465394	0.0291197	0.0474334	0.0261595	0.0365754	0.0153183	0.00628435	0.0250101	0.00312433
UID608	MEIS1..4211./409	409	409-IDLVIDDREGGSKSDSEDITRSANLTDQPSW	4211	MEIS1	NA	-1.27411	-1.63117	NA	-1.39539	-2.5065	-3.2435	-1.34311	-2.59085	-1.00135	-2.10431	NA	0.247027	NA	-1.38462	-0.409199	3.08743	-1.68261	-0.933511	NA	NA	NA	-2.17364	NA	NA	-0.128256	NA	NA	17		MEIS1..4211.	0.046547	0.0590117	0.00553661	0.059222	0.0465394	0.0291197	0.0474334	0.0261595	0.0365754	0.0153183	0.00628435	0.0250101	0.00312433
UID610	ELL2..22936./411	411	411-SRSESPVCSSRDAVSSPQKRLLDSEFIDPLM	22936	ELL2	0.0612133	-0.949617	-0.662009	-0.494622	NA	-1.56707	-2.59536	-0.990493	-1.86055	NA	-2.11374	-0.992903	-1.52084	-0.908075	-2.65278	-1.45174	0.839991	-1.74192	-2.39364	1.8845	-0.800161	NA	-0.863332	-0.67911	-0.745812	-1.55716	-1.36503	NA	24		ELL2..22936.	0.0871718	0.209589	0.030094	0.17104	0.367757	0.04814	0.124946	0.0912082	0.157029	0.555463	0.120745	0.398177	0.176107
UID611	ELL2..22936./412	412	412-EEDLKREEEIAKLNNSSPNSSGGVKEDCTAS	22936	ELL2	0.0829802	-0.679842	NA	NA	NA	NA	-0.724257	NA	NA	NA	-0.922729	-0.656816	NA	NA	-0.875756	-0.384359	0.34754	NA	-0.648227	1.53012	NA	NA	-0.432119	NA	-0.7361	-0.412577	-0.44136	NA	14		ELL2..22936.	0.0871718	0.209589	0.030094	0.17104	0.367757	0.04814	0.124946	0.0912082	0.157029	0.555463	0.120745	0.398177	0.176107
UID612	ELL2..22936./413	413	413-EDLKREEEIAKLNNSSPNSSGGVKEDCTASM	22936	ELL2	NA	NA	-0.606645	-1.06779	-0.858123	-1.01017	-0.951387	-0.777902	-1.4813	NA	-0.774941	-2.05066	-0.731899	NA	-1.32529	-1.22698	0.364302	-0.689024	-0.980847	1.34094	NA	-1.81587	-0.321716	-0.955555	-0.458285	-0.756341	NA	-1.29877	22		ELL2..22936.	0.0871718	0.209589	0.030094	0.17104	0.367757	0.04814	0.124946	0.0912082	0.157029	0.555463	0.120745	0.398177	0.176107
UID616	ELL2..22936./415	415	415-KLNPSQNAAGTSRSESPVCSSRDAVSSPQKR	22936	ELL2	0.768214	-0.893511	0.428539	-1.77125	-0.628088	-1.11077	-2.25084	-0.843193	-1.22439	-0.628116	-1.2206	-1.42201	-2.01075	-0.762725	-1.48707	-0.513967	0.976564	-1.15677	-1.81808	2.1501	-0.981571	-1.31618	-0.0839386	-1.76029	-0.495425	-1.2665	-1.33361	-1.0107	28		ELL2..22936.	0.0871718	0.209589	0.030094	0.17104	0.367757	0.04814	0.124946	0.0912082	0.157029	0.555463	0.120745	0.398177	0.176107
UID618	HMGN4..10473./417	417	417-KAKVKDEPQRRSARLSAKPAPPKPEPRPKKA	10473	HMGN4	-0.652164	NA	-0.00339794	-0.79258	NA	-0.163306	-0.293667	-0.260777	-0.232926	NA	-0.0947556	0.904554	-0.486084	0.588406	NA	NA	0.174838	-0.635242	0.581157	-0.0791359	-0.189003	NA	0.0571766	0.0806503	0.605805	NA	-0.596559	NA	20		HMGN4..10473.	0.166914	0.45413	0.183076	0.123439	0.0593695	0.0406467	0.0916981	0.249806	0.231993	0.278806	0.0965068	0.662498	0.386921
UID620	BIN1..274./418	418	418-VKAQPSDNAPAKGNKSPSPPDGSPAATPEIR	274	BIN1	1.39217	-1.63291	0.813434	0.270789	-0.0415268	0.0352521	-0.465251	0.216053	0.527771	-0.897365	0.365818	-0.718174	-0.0243572	0.743582	-0.0736513	0.308046	-1.83239	-0.320446	0.484347	-0.150595	0.0923379	0.998914	0.471154	-0.426043	0.679682	-0.857671	1.21382	0.0496508	28		BIN1..274.	0.135027	0.019784	0.0589246	0.027815	0.0929598	0.0779601	0.0863805	0.11643	0.152754	0.0204167	0.0922632	0.00918952	0.0251135
UID621	BIN1..274./419	419	419-AQPSDNAPAKGNKSPSPPDGSPAATPEIRVN	274	BIN1	1.71791	-0.884744	1.0639	0.633592	0.159575	0.172938	-0.35392	0.251376	0.941326	-0.360662	0.867825	-0.68928	0.194261	0.991163	0.391679	0.148168	-1.073	-0.0224109	0.440074	-0.020706	0.0993462	0.988321	0.741824	-0.180532	0.907139	-0.379503	1.73119	0.0995833	28		BIN1..274.	0.135027	0.019784	0.0589246	0.027815	0.0929598	0.0779601	0.0863805	0.11643	0.152754	0.0204167	0.0922632	0.00918952	0.0251135
UID622	BIN1..274./420	420	420-NAPAKGNKSPSPPDGSPAATPEIRVNHEPEP	274	BIN1	1.02997	-0.0533144	0.0493825	0.102129	0.280286	0.463746	-0.266175	-0.0913051	0.485995	-0.161749	0.130119	-0.418869	0.0184857	0.365316	0.312342	-0.00268237	-0.258298	-0.198876	0.562913	-0.164979	-0.15719	0.604065	0.419405	0.158684	0.277828	-0.176612	0.670111	0.155218	28		BIN1..274.	0.135027	0.019784	0.0589246	0.027815	0.0929598	0.0779601	0.0863805	0.11643	0.152754	0.0204167	0.0922632	0.00918952	0.0251135
UID623	BIN1..274./421	421	421-PEPAGGATPGATLPKSPSQSSLPAVVVETFP	274	BIN1	0.322334	-0.206913	0.0617418	-0.184955	0.0441074	0.0487688	-0.176231	0.55874	0.172038	0.0388586	0.0839569	-0.138616	-0.0810715	0.157529	-0.135871	0.346243	-0.419908	0.422842	-0.131192	-0.05477	-0.589552	0.0305185	0.0846756	0.461109	0.291011	0.129781	-0.0526738	0.157297	28		BIN1..274.	0.135027	0.019784	0.0589246	0.027815	0.0929598	0.0779601	0.0863805	0.11643	0.152754	0.0204167	0.0922632	0.00918952	0.0251135
UID626	BIN1..274./424	424	424-GATPGATLPKSPSQSSLPAVVVETFPATVNG	274	BIN1	0.872929	-0.0956588	0.0446339	0.00477425	0.105686	0.100133	0.128311	0.30243	0.307152	0.426925	0.150052	-0.0426792	0.157326	0.0829147	0.474762	0.0441825	-0.0310826	0.209006	0.14335	0.159979	0.0616007	0.565669	0.204994	0.189933	0.147199	0.0937332	0.558958	0.161228	28		BIN1..274.	0.135027	0.019784	0.0589246	0.027815	0.0929598	0.0779601	0.0863805	0.11643	0.152754	0.0204167	0.0922632	0.00918952	0.0251135
UID628	KPNA3..3839./425	425	425-LLKKRNVPQEESLEDSDVDADFKAQNVTLEA	3839	KPNA3	-0.12154	-0.325857	-0.588669	0.094914	-0.235408	-0.339551	-0.661745	-0.0805222	-0.714943	-1.13615	-0.408526	0.478503	-0.270085	-0.120906	-0.514977	0.136436	-0.893773	-0.793176	-0.483717	-0.124091	0.0571925	-0.395911	-0.271099	-0.434877	-0.44259	-0.511022	0.329732	-0.609518	28		KPNA3..3839.	0.027503	0.00228611	0.0503509	0.0396051	0.0124318	0.0656877	0.0306269	0.0275995	0.0684826	0.00556349	0.0309373	0.0173364	0.00710606
UID629	STK25..10494./426	426	426-SDLHPMRVLFLIPKNSPPTLEGQHSKPFKEF	10494	STK25	-0.0753717	-0.231227	NA	NA	NA	NA	0.256597	NA	NA	NA	-0.236363	-0.0518484	NA	NA	-0.044879	0.463123	-0.333555	NA	-0.0908966	0.232433	NA	NA	-0.208863	NA	0.119208	0.572015	-0.00893688	NA	14		STK25..10494.	0.040768	0.0795016	0.0715167	0.0666929	0.0105211	0.019495	0.0334179	0.0459918	0.0794093	0.0289026	0.128474	0.0384841	0.0355465
UID630	BCL9..607./427	427	427-AGNGAKGKGKRERSISADSFDQRDPGTPNDD	607	BCL9	1.36272	-0.228942	0.427115	-0.0213072	0.671533	0.0328941	0.847651	0.235315	1.47425	0.530558	1.65566	-0.416082	-0.36179	-0.094677	0.581536	0.267532	1.63189	0.880322	0.532181	0.0443668	1.16783	0.49121	0.190238	0.189137	0.0894442	0.495466	1.00959	0.989513	28		BCL9..607.	0.191507	0.21307	0.0151247	0.162921	0.166779	0.118037	0.13569	0.161567	0.0568067	0.279602	0.071575	0.18235	0.181963
UID631	BCL9..607./428	428	428-PAPKPAAPPRPLDRESPGVENKLIPSVGSPA	607	BCL9	-0.13699	-1.37162	-0.163129	0.312031	0.17677	-0.0347641	-0.0099802	-0.315874	0.313854	-0.743617	0.938996	-0.878035	-1.21528	-0.462651	-0.277725	0.382716	0.325938	0.201573	0.150728	-0.633958	-0.104758	-0.284368	-0.103401	-0.667075	-0.506249	-0.076282	0.382475	0.371827	28		BCL9..607.	0.191507	0.21307	0.0151247	0.162921	0.166779	0.118037	0.13569	0.161567	0.0568067	0.279602	0.071575	0.18235	0.181963
UID632	BCL9..607./429	429	429-GNNPIFPRIPVEGPLSPSRGDFPKGIPPQMG	607	BCL9	0.180998	-2.13497	0.314288	0.524483	0.538984	0.0933894	0.0913312	-0.168685	0.61783	-1.0654	1.13627	-1.09355	-2.91936	-0.262215	-0.434904	0.0941041	0.34114	0.0828919	0.260706	-0.619062	0.502168	-0.0238498	-0.167201	-0.940104	-0.466588	-0.0672468	0.429695	0.253701	28		BCL9..607.	0.191507	0.21307	0.0151247	0.162921	0.166779	0.118037	0.13569	0.161567	0.0568067	0.279602	0.071575	0.18235	0.181963
UID633	BCL9..607./430	430	430-RESPGVENKLIPSVGSPASSTPLPPDGTGPN	607	BCL9	-0.0809045	0.119231	0.0153014	0.345412	0.326668	0.0600305	0.0556771	-0.123743	0.131886	-0.0651116	0.145428	-0.605224	-0.0999695	0.0577284	0.193796	-0.129587	-0.171559	-0.184812	-0.0180998	-0.105535	-0.104596	-0.121957	0.124429	-0.143429	0.158593	-0.123552	0.298515	0.00519625	28		BCL9..607.	0.191507	0.21307	0.0151247	0.162921	0.166779	0.118037	0.13569	0.161567	0.0568067	0.279602	0.071575	0.18235	0.181963
UID636	BCL9..607./432	432	432-PKSKQEVMVRPPTVMSPSGNPQLDSKFSNQG	607	BCL9	NA	-0.420861	0.253455	0.156819	0.0901179	0.270272	0.227774	-0.322049	0.131264	0.0222743	0.590461	-0.629262	-0.474161	0.010767	-0.16686	0.00914383	0.434596	0.153522	0.0887575	-0.0436468	NA	-0.00600815	0.0948622	0.386907	-0.108685	-0.042521	NA	-0.0892372	25		BCL9..607.	0.191507	0.21307	0.0151247	0.162921	0.166779	0.118037	0.13569	0.161567	0.0568067	0.279602	0.071575	0.18235	0.181963
UID637	BCL9..607./433	433	433-SNQGKQGGSASQSQPSPCDSKSGGHTPKALP	607	BCL9	NA	NA	NA	-0.0581226	0.215747	-0.494554	NA	0.058279	0.220984	-0.284051	NA	-0.63535	-0.725994	-0.587801	0.103006	0.0617332	NA	0.0948234	NA	-1.07712	NA	-0.720272	NA	-0.142354	-0.634329	-0.270563	NA	0.278836	18		BCL9..607.	0.191507	0.21307	0.0151247	0.162921	0.166779	0.118037	0.13569	0.161567	0.0568067	0.279602	0.071575	0.18235	0.181963
UID639	BCL9..607./434	434	434-AASIKSPPVLGSAAASPVHLKSPSLPAPSPG	607	BCL9	0.00387144	-0.552356	0.155558	0.633323	0.0275733	0.170524	-0.00101693	0.068394	0.562561	-0.410157	0.892407	-0.508029	-0.677669	-0.336768	-0.17917	0.366707	0.851338	-0.1057	0.288259	-0.376964	0.0557435	-0.351907	0.18818	-0.336974	-0.213653	-0.18742	0.385096	0.305529	28		BCL9..607.	0.191507	0.21307	0.0151247	0.162921	0.166779	0.118037	0.13569	0.161567	0.0568067	0.279602	0.071575	0.18235	0.181963
UID645	BCL9..607./437	437	437-SNPKVRSSPSGNTQSSPKSKQEVMVRPPTVM	607	BCL9	0.0452587	-0.423631	0.20764	0.619442	0.366194	0.226033	0.0432612	-0.19009	0.258464	-0.0112192	0.940385	-0.971175	-0.767652	-0.136065	-0.0902049	-0.0116514	0.308465	0.475583	0.0908432	-0.588994	0.582757	-0.17092	0.147357	-0.222756	-0.13438	0.355085	0.724163	0.211035	28		BCL9..607.	0.191507	0.21307	0.0151247	0.162921	0.166779	0.118037	0.13569	0.161567	0.0568067	0.279602	0.071575	0.18235	0.181963
UID649	LAD1..3898./438	438	438-SEKASIFEKALASEKSPTADAKPAPKRATAS	3898	LAD1	0.662703	0.81772	0.894161	0.785635	-0.0792745	0.329684	1.43245	1.38288	1.19475	0.319178	-0.237295	0.615734	0.440612	0.853666	0.815499	-0.724082	-1.14397	0.605092	2.42138	-0.721219	-0.0991007	0.85178	0.243971	0.414918	0.45681	0.631946	0.306017	1.39256	28		LAD1..3898.	0.0456726	0.0824951	0.0460385	0.0359214	0.0204749	0.0345557	0.168465	0.0152486	0.0109293	0.0429758	0.00774847	0.0310008	0.00735816
UID650	LAD1..3898./439	439	439-RATASEQPLAQEPPASGGSPATTKEQRGRAL	3898	LAD1	0.243315	0.404153	NA	NA	NA	NA	0.409027	NA	NA	NA	0.174418	0.40582	NA	NA	0.509097	-1.03878	-0.768311	NA	1.70266	-0.698048	NA	NA	0.0439816	NA	0.414894	0.51899	0.0176954	NA	14		LAD1..3898.	0.0456726	0.0824951	0.0460385	0.0359214	0.0204749	0.0345557	0.168465	0.0152486	0.0109293	0.0429758	0.00774847	0.0310008	0.00735816
UID651	LAD1..3898./440	440	440-ASEQPLAQEPPASGGSPATTKEQRGRALPGK	3898	LAD1	0.33927	0.717612	0.705682	0.493484	-0.331446	-0.160762	1.25758	0.389322	0.750116	-0.385082	0.233938	-0.272096	1.50232	0.911501	0.69973	-1.05782	-0.815006	-0.044236	1.39019	-0.870825	-0.13092	0.150712	-0.176652	0.309693	0.419261	0.46166	0.0979139	0.735663	28		LAD1..3898.	0.0456726	0.0824951	0.0460385	0.0359214	0.0204749	0.0345557	0.168465	0.0152486	0.0109293	0.0429758	0.00774847	0.0310008	0.00735816
UID652	LAD1..3898./441	441	441-TLQVKIPSKEEEADMSSPTQRTYSSSLKRSS	3898	LAD1	1.25105	0.38639	1.80253	-0.253547	0.549621	-0.391191	1.32591	1.05176	1.64254	1.09397	1.06892	0.499255	1.31146	0.534819	2.28777	-1.6214	-1.14755	0.260441	1.90552	-1.48283	1.21279	1.12231	0.474464	0.725773	0.345491	0.627039	1.16376	1.1075	28		LAD1..3898.	0.0456726	0.0824951	0.0460385	0.0359214	0.0204749	0.0345557	0.168465	0.0152486	0.0109293	0.0429758	0.00774847	0.0310008	0.00735816
UID653	LAD1..3898./442	442	442-LQVKIPSKEEEADMSSPTQRTYSSSLKRSSP	3898	LAD1	1.00401	0.170836	1.45537	-0.0372519	0.348635	-0.460753	1.01042	0.865422	1.64909	0.941083	0.831508	0.754327	1.12968	0.637398	2.12048	-0.906611	-0.583886	0.22588	1.72248	-0.915562	0.789911	0.814337	0.388864	0.492489	0.28658	0.365339	0.823867	1.56272	28		LAD1..3898.	0.0456726	0.0824951	0.0460385	0.0359214	0.0204749	0.0345557	0.168465	0.0152486	0.0109293	0.0429758	0.00774847	0.0310008	0.00735816
UID654	LAD1..3898./443	443	443-SRAEPASSRKENLRLSGVVTSRLNLWISRTQ	3898	LAD1	0.57916	0.320901	0.992917	-0.362558	-0.183789	0.0858995	0.545555	1.1745	0.677504	0.505416	0.131692	0.343026	0.1358	0.511888	0.927373	-0.329013	-0.788832	0.871425	1.73498	-1.20833	0.108332	1.5782	0.038746	-0.378884	0.0317084	0.349037	0.489871	1.18477	28		LAD1..3898.	0.0456726	0.0824951	0.0460385	0.0359214	0.0204749	0.0345557	0.168465	0.0152486	0.0109293	0.0429758	0.00774847	0.0310008	0.00735816
UID656	LAD1..3898./444	444	444-VGREPEERKKGVPEKSPVLEKSSMPKKTAPE	3898	LAD1	0.413872	1.38216	1.35712	1.07112	-0.322866	0.137481	1.40481	1.01079	1.58799	0.833072	1.2979	0.0974925	0.465917	1.07365	1.45523	-0.872089	-0.794436	0.435082	2.2043	-0.984549	0.876967	0.519059	1.17327	0.987	0.525724	0.935228	1.23674	1.18469	28		LAD1..3898.	0.0456726	0.0824951	0.0460385	0.0359214	0.0204749	0.0345557	0.168465	0.0152486	0.0109293	0.0429758	0.00774847	0.0310008	0.00735816
UID657	LAD1..3898./445	445	445-EEEQERERRRRHRNLSSTTDDEAPRLSQNGD	3898	LAD1	0.607672	0.249233	1.33262	-0.172567	0.177714	-0.163936	-0.0390336	0.164575	0.358464	0.266432	0.15776	-0.0555191	0.49574	0.163659	0.520747	-0.0948162	0.196469	-0.0823667	0.245924	-0.121133	0.505935	0.266357	0.0762391	-0.0705051	0.0501865	0.0586596	0.217132	-0.00290585	28		LAD1..3898.	0.0456726	0.0824951	0.0460385	0.0359214	0.0204749	0.0345557	0.168465	0.0152486	0.0109293	0.0429758	0.00774847	0.0310008	0.00735816
UID658	LAD1..3898./446	446	446-EEQERERRRRHRNLSSTTDDEAPRLSQNGDR	3898	LAD1	0.7309	-0.278984	0.0437323	-0.0167988	-0.148081	-0.601714	0.178058	0.714435	1.13832	1.24666	-0.0524958	0.0364904	0.521525	0.414242	1.35239	-0.370857	-0.434967	-0.226367	0.64973	-0.278551	0.116866	-0.153549	0.31625	0.406846	-0.237274	-0.0917225	0.209198	0.285221	28		LAD1..3898.	0.0456726	0.0824951	0.0460385	0.0359214	0.0204749	0.0345557	0.168465	0.0152486	0.0109293	0.0429758	0.00774847	0.0310008	0.00735816
UID659	LAD1..3898./447	447	447-VASRLPPVTLQVKIPSKEEEADMSSPTQRTY	3898	LAD1	1.21724	0.384259	3.11896	1.11237	-0.0185494	0.00270677	0.0463066	1.23248	0.182621	-0.789081	1.26161	-0.470487	1.12653	0.262313	2.12483	-0.0925288	0.456423	-0.183166	0.127656	-0.500773	0.399856	0.959026	0.869044	-0.165899	0.993236	-0.0155125	1.60465	-0.222691	28		LAD1..3898.	0.0456726	0.0824951	0.0460385	0.0359214	0.0204749	0.0345557	0.168465	0.0152486	0.0109293	0.0429758	0.00774847	0.0310008	0.00735816
UID660	LAD1..3898./448	448	448-SPRTISFRMKPKKENSETTLTRSASMKLPDN	3898	LAD1	NA	0.361921	3.18393	NA	0.173866	-0.00902033	1.09008	2.303	0.355155	1.28231	1.15995	NA	2.01986	NA	2.78935	-1.89399	-0.925264	0.154284	1.14786	NA	NA	NA	1.35097	NA	NA	0.0111618	NA	NA	17		LAD1..3898.	0.0456726	0.0824951	0.0460385	0.0359214	0.0204749	0.0345557	0.168465	0.0152486	0.0109293	0.0429758	0.00774847	0.0310008	0.00735816
UID661	LAD1..3898./449	449	449-QAPIQERLEAEEGRNSLSPVQATQKPLVSKK	3898	LAD1	0.370696	0.566889	1.33563	0.13766	0.579933	-0.22922	0.261295	0.363329	0.504847	0.388593	0.390161	0.660261	0.216768	0.1235	1.04966	-0.456814	-0.181059	0.252324	1.41975	-0.503613	1.30707	0.79704	0.0800889	-0.151321	-0.039197	0.414658	0.572168	0.593483	28		LAD1..3898.	0.0456726	0.0824951	0.0460385	0.0359214	0.0204749	0.0345557	0.168465	0.0152486	0.0109293	0.0429758	0.00774847	0.0310008	0.00735816
UID662	LAD1..3898./450	450	450-PIQERLEAEEGRNSLSPVQATQKPLVSKKEL	3898	LAD1	0.578714	1.09734	1.36233	0.532947	0.0519377	-0.335687	0.89601	0.504682	0.416009	-0.0244247	0.506909	0.609436	0.751243	0.890674	1.31504	-0.618421	-0.475073	0.145049	1.25806	-0.632795	0.310844	0.661462	0.36464	0.0826855	0.290799	0.437746	0.764214	0.760333	28		LAD1..3898.	0.0456726	0.0824951	0.0460385	0.0359214	0.0204749	0.0345557	0.168465	0.0152486	0.0109293	0.0429758	0.00774847	0.0310008	0.00735816
UID663	LAD1..3898./451	451	451-SQNGDRQASASERLPSVEEAEVPKPLPPASK	3898	LAD1	1.31228	0.403453	1.82488	0.124817	0.502276	-0.318742	1.63091	1.33375	1.45845	1.59129	0.609242	1.08388	0.986909	0.71424	2.2135	-0.402117	-0.632325	0.0412749	2.28009	-0.551987	0.83253	1.01251	0.400098	0.644529	0.357342	0.417809	1.00464	1.37094	28		LAD1..3898.	0.0456726	0.0824951	0.0460385	0.0359214	0.0204749	0.0345557	0.168465	0.0152486	0.0109293	0.0429758	0.00774847	0.0310008	0.00735816
UID664	LAD1..3898./452	452	452-HRNLSSTTDDEAPRLSQNGDRQASASERLPS	3898	LAD1	0.322017	1.7197	1.71747	0.549225	0.0234694	0.0136292	0.596936	0.876265	0.35891	-0.28886	0.524031	-0.0644011	0.44204	0.608028	1.54775	-0.65934	-0.203521	0.408564	1.47475	-0.39841	0.377149	1.15311	0.727994	0.142557	0.0892143	0.803147	1.11717	0.863497	28		LAD1..3898.	0.0456726	0.0824951	0.0460385	0.0359214	0.0204749	0.0345557	0.168465	0.0152486	0.0109293	0.0429758	0.00774847	0.0310008	0.00735816
UID665	LAD1..3898./453	453	453-RMKPKKENSETTLTRSASMKLPDNTVKLGEK	3898	LAD1	0.441754	-0.393963	2.89838	-0.491511	-0.427284	0.461866	0.777057	1.58983	-0.0541495	1.78454	1.08877	-0.200762	0.642706	0.192286	1.39132	-2.25355	-2.45756	0.879014	2.16064	-0.735332	1.32775	1.22458	0.409764	0.0587972	-0.0411849	-0.247969	0.493623	0.239723	28		LAD1..3898.	0.0456726	0.0824951	0.0460385	0.0359214	0.0204749	0.0345557	0.168465	0.0152486	0.0109293	0.0429758	0.00774847	0.0310008	0.00735816
UID666	LAD1..3898./454	454	454-KPKKENSETTLTRSASMKLPDNTVKLGEKLE	3898	LAD1	0.714378	-0.412228	2.23134	-0.581878	-0.822517	0.220856	0.629757	1.48065	-0.186337	2.17771	0.559403	0.555103	0.59544	0.218107	1.66707	-2.60684	-1.95463	0.713466	1.79343	-1.1025	1.26052	1.44847	-0.00246064	0.448945	0.193337	-0.799354	0.506085	0.318581	28		LAD1..3898.	0.0456726	0.0824951	0.0460385	0.0359214	0.0204749	0.0345557	0.168465	0.0152486	0.0109293	0.0429758	0.00774847	0.0310008	0.00735816
UID668	LAD1..3898./455	455	455-LERYHTAIRRSESVKSRGLPCTELFVAPVGV	3898	LAD1	0.829272	0.212895	1.29838	NA	-0.0572958	0.482719	0.344324	0.694201	0.23549	1.54782	0.878275	0.718928	0.452071	0.200005	0.847067	-0.163233	-0.27819	0.53948	1.58582	-0.135191	0.585583	0.654707	0.413507	NA	0.514441	0.504798	0.509758	NA	25		LAD1..3898.	0.0456726	0.0824951	0.0460385	0.0359214	0.0204749	0.0345557	0.168465	0.0152486	0.0109293	0.0429758	0.00774847	0.0310008	0.00735816
UID669	LAD1..3898./456	456	456-VVTSRLNLWISRTQESGDQDPQEAQKASSAT	3898	LAD1	1.34456	0.24689	0.223331	0.391655	0.23222	0.307283	0.0501814	1.39259	0.118243	-0.210092	1.052	-0.0161289	0.965782	0.193851	2.06025	-0.26777	-0.416242	0.0700523	0.776034	-0.308629	-0.28938	1.21317	0.896883	-0.350925	0.864854	0.15138	1.32453	0.161048	28		LAD1..3898.	0.0456726	0.0824951	0.0460385	0.0359214	0.0204749	0.0345557	0.168465	0.0152486	0.0109293	0.0429758	0.00774847	0.0310008	0.00735816
UID673	LAD1..3898./457	457	457-EEEADMSSPTQRTYSSSLKRSSPRTISFRMK	3898	LAD1	0.443434	NA	NA	0.164184	NA	0.0200672	-0.0292568	0.470077	1.09958	0.548737	NA	0.286856	0.85017	0.49092	NA	NA	NA	0.821661	NA	-0.265382	0.49425	NA	NA	0.64789	-0.695384	NA	2.71204	0.103907	17		LAD1..3898.	0.0456726	0.0824951	0.0460385	0.0359214	0.0204749	0.0345557	0.168465	0.0152486	0.0109293	0.0429758	0.00774847	0.0310008	0.00735816
UID674	LAD1..3898./458	458	458-EEADMSSPTQRTYSSSLKRSSPRTISFRMKP	3898	LAD1	1.04292	-0.0168571	2.9932	0.304996	-0.238212	-0.0166225	1.14928	0.79661	0.693133	0.3899	1.13772	0.189585	1.30437	0.899143	1.33097	-1.30014	-0.0366983	0.433624	1.91471	-3.6164	0.489217	0.851887	0.569064	0.759486	0.847367	-0.00505447	1.10538	0.12911	28		LAD1..3898.	0.0456726	0.0824951	0.0460385	0.0359214	0.0204749	0.0345557	0.168465	0.0152486	0.0109293	0.0429758	0.00774847	0.0310008	0.00735816
UID676	FAAH..2166./460	460	460-GSGGSPLGLGTDIGGSIRFPSSFCGICGLKP	2166	FAAH	0.13496	0.231674	-0.0678725	0.274972	-0.0218015	NA	0.180294	0.336061	NA	-0.0249121	-0.0683517	0.11048	-0.0482125	-0.0457702	-0.0550394	-0.0670643	-0.252265	-0.0749502	-0.0450935	-0.236748	0.697783	0.229226	-0.0951972	0.140553	-0.043292	0.109422	0.109163	NA	25		FAAH..2166.	0.0635748	0.00219084	0.121558	0.0284682	0.0627621	0.0216492	0.138855	0.181873	0.0359612	0.0171726	0.00161437	0.247959	0.0206441
UID677	KRIT1..889./461	461	461-IEDAYVAVIRPKNTASLNSREYRAKSYEILL	889	KRIT1	-0.103045	-0.750349	-2.05692	NA	-0.968666	NA	-0.238223	NA	NA	-0.325145	-0.451237	0.446174	NA	NA	0.666391	0.86862	-0.611928	1.81672	0.776687	-0.00802755	NA	NA	-0.591028	NA	-0.600161	-0.242737	0.419539	NA	18		KRIT1..889.	0.025964	0.038664	0.0242194	0.0717853	0.00641989	0.0736292	0.0173882	0.0126211	0.0517053	0.0175254	0.0302499	0.0247423	0.0196598
UID679	EBAG9..9166./462	462	462-FLKRLICRSGRGRKLSGDQITLPTTVDYSSV	9166	EBAG9	0.186274	0.0241946	0.873491	0.341828	0.33306	-0.115976	0.423649	-0.0892712	0.0889519	0.576857	0.0819589	0.081371	0.347609	0.370849	0.418625	-0.326079	-0.029222	-0.0273197	0.324103	0.395754	1.17729	0.228077	0.851426	0.188781	-0.124343	0.149597	0.473304	0.0282586	28		EBAG9..9166.	0.0523974	0.00952573	0.0243577	0.0370171	0.0498839	0.0538455	0.005386	0.0890987	0.0177396	0.021436	0.026515	0.0372166	0.0257471
UID680	SDCBP..6386./463	463	463-LYPRLYPELSQYMGLSLNEEEIRANVAVVSG	6386	SDCBP	-0.0533335	0.0282896	-0.353205	-0.263713	-0.449492	0.117755	0.278776	0.114116	-0.392998	0.0397928	-0.00901143	0.142026	-0.0823259	-0.0999908	-0.0281032	0.308408	-0.156089	-0.221418	-0.0462545	0.331014	0.23163	-0.510911	0.185233	-0.291485	-0.0814969	0.103853	0.376154	-0.313792	28		SDCBP..6386.	0.153932	0.502891	0.0528129	0.338515	0.0552096	0.0515686	0.0744124	0.176097	0.116721	0.10171	0.0136597	0.0970242	0.0982777
UID684	SDCBP..6386./465	465	465-__________MSLYPSLEDLKVDKVIQAQTA	6386	SDCBP	-0.764491	-1.21725	-1.04732	-0.0894262	-1.07249	-1.1149	-1.38684	0.635032	-0.689234	-1.74503	-1.61005	-1.21305	-0.923058	-0.950401	-0.669344	0.399722	-1.1945	-0.844759	-0.569603	-0.69385	-0.253164	-0.442726	0.372025	-1.03184	-0.905568	1.19331	-0.293476	-1.36598	28		SDCBP..6386.	0.153932	0.502891	0.0528129	0.338515	0.0552096	0.0515686	0.0744124	0.176097	0.116721	0.10171	0.0136597	0.0970242	0.0982777
UID687	PITPNM1..9600./468	468	468-VRDPLADGVEGLGRGSPEPSALPPQRIPSDM	9600	PITPNM1	0.255039	-0.185571	0.144771	0.2689	0.187331	-0.561876	0.0372197	-0.218317	0.189773	-0.515269	0.0440745	-0.121584	0.553415	-0.127747	0.491996	0.625125	0.279417	-0.188371	0.0918016	0.362812	0.546939	0.582783	0.312064	0.126801	-0.183603	0.238114	0.274853	0.393777	28		PITPNM1..9600.	0.162678	0.607094	0.133116	0.280639	0.250158	0.31641	0.145941	0.262366	0.321364	0.243884	0.116547	0.401419	0.24018
UID688	PITPNM1..9600./469	469	469-QAAPATTSSWEPRRASTAFCPPAASSEAPDG	9600	PITPNM1	0.252705	-0.221867	-0.212092	0.138549	-0.094957	-0.138452	-0.171974	-0.360762	0.155141	-0.203731	-0.330231	-0.112069	-0.0776615	-0.471177	0.164912	0.319401	1.21441	-0.299646	-0.205729	0.615071	0.553477	-0.0601807	-0.273728	-0.119394	-0.148173	0.266298	0.126923	-0.0139036	28		PITPNM1..9600.	0.162678	0.607094	0.133116	0.280639	0.250158	0.31641	0.145941	0.262366	0.321364	0.243884	0.116547	0.401419	0.24018
UID689	PITPNM1..9600./470	470	470-SANAGTGSRGSSRRGSMNNELLSPEFGPVRD	9600	PITPNM1	0.68599	0.000181675	0.304401	0.203915	0.54963	-0.334611	-0.00695833	-0.248771	0.0770583	-0.151779	-0.152386	0.324142	0.315081	-0.124247	0.470947	0.748084	-0.00440105	-0.21212	0.257589	0.548134	0.19069	1.06109	0.088752	0.272811	-0.484298	0.360022	0.753537	0.354067	28		PITPNM1..9600.	0.162678	0.607094	0.133116	0.280639	0.250158	0.31641	0.145941	0.262366	0.321364	0.243884	0.116547	0.401419	0.24018
UID693	PITPNM1..9600./472	472	472-GTPPTTLARGKARSISLKLDSEE________	9600	PITPNM1	1.10585	0.0812418	0.937563	NA	0.190965	NA	-0.201411	NA	NA	-0.272175	0.264099	-0.079977	NA	-0.130431	0.316083	0.626908	0.783924	NA	0.266942	0.498379	0.432899	0.540084	0.425886	NA	-0.0975981	-0.334065	0.272021	NA	20		PITPNM1..9600.	0.162678	0.607094	0.133116	0.280639	0.250158	0.31641	0.145941	0.262366	0.321364	0.243884	0.116547	0.401419	0.24018
UID694	PITPNM1..9600./473	473	473-SDSEEVFPKEMTKWNSNDFIDAFASPVEAEG	9600	PITPNM1	0.166171	-0.697234	-0.0249084	0.412199	0.619788	-0.56008	-0.189325	-0.0374565	0.395039	-0.533784	0.347132	0.0791804	0.877599	0.0723852	0.858317	0.593194	-0.24392	-0.345808	0.139256	0.578725	0.260052	0.752482	0.382751	0.405818	-0.644266	0.596507	0.819423	0.513748	28		PITPNM1..9600.	0.162678	0.607094	0.133116	0.280639	0.250158	0.31641	0.145941	0.262366	0.321364	0.243884	0.116547	0.401419	0.24018
UID698	NOP56..10528./474	474	474-SKPKKKKSFSKEELMSSDLEETAGSTSIPKR	10528	NOP56	0.217453	0.318028	0.668513	0.330554	0.200853	0.440431	0.378258	0.257456	0.118239	0.162788	0.665313	-0.0330245	0.59095	0.319531	0.112591	-0.0872548	0.285524	-0.207254	0.0532554	0.371343	0.374874	-0.0281162	0.452274	0.00195853	0.247558	-0.0755049	0.504775	-0.0821489	28		NOP56..10528.	0.992763	0.999999	1	0.99543	0.998358	0.999736	0.993859	0.999132	0.999718	0.998257	0.919014	0.227356	0.994393
UID699	NOP56..10528./475	475	475-KPKKKKSFSKEELMSSDLEETAGSTSIPKRK	10528	NOP56	-0.00795857	0.0445867	0.412404	0.348938	0.464007	0.458772	0.185394	0.322896	0.063169	0.51784	0.292562	-0.0465492	0.364992	0.362459	0.1084	-0.177598	-0.292116	-0.0580656	0.0813697	0.373153	0.573908	0.268312	0.51651	0.399924	0.364325	0.126041	0.471079	0.0867049	28		NOP56..10528.	0.992763	0.999999	1	0.99543	0.998358	0.999736	0.993859	0.999132	0.999718	0.998257	0.919014	0.227356	0.994393
UID701	NOP56..10528./476	476	476-SGSKKKRKFSKEEPVSSGPEEAVGKSSSKKK	10528	NOP56	NA	-2.10712	0.483728	0.860155	0.614793	-0.546656	NA	NA	-0.947979	0.215559	0.563299	0.139635	NA	NA	0.613265	0.266341	0.130347	0.600428	0.638746	-0.739253	NA	0.743402	1.1974	0.606308	0.982443	0.626931	NA	0.374733	21		NOP56..10528.	0.992763	0.999999	1	0.99543	0.998358	0.999736	0.993859	0.999132	0.999718	0.998257	0.919014	0.227356	0.994393
UID702	NOP56..10528./477	477	477-GSKKKRKFSKEEPVSSGPEEAVGKSSSKKKK	10528	NOP56	0.731003	-0.849345	0.535611	1.09296	0.540058	-1.02921	-1.34255	0.739296	-1.15145	0.202313	0.378236	-0.0832733	0.240647	-1.0337	0.534127	0.161416	0.321365	0.498814	0.510615	-0.986348	0.95635	0.663884	0.858497	1.01386	1.29828	0.653354	-0.267989	0.43044	28		NOP56..10528.	0.992763	0.999999	1	0.99543	0.998358	0.999736	0.993859	0.999132	0.999718	0.998257	0.919014	0.227356	0.994393
UID704	NOP56..10528./478	478	478-EEAGHRSGSKKKRKFSKEEPVSSGPEEAVGK	10528	NOP56	0.661162	-0.622417	1.11922	0.423336	-0.193626	-0.856658	-0.375318	0.354478	-0.273988	2.99208	1.20948	-0.228364	1.13124	-0.187346	1.63644	-0.217075	1.46814	0.301614	0.644886	-0.588978	NA	NA	0.313289	3.17823	-0.0430059	-0.328472	0.276656	0.74227	26		NOP56..10528.	0.992763	0.999999	1	0.99543	0.998358	0.999736	0.993859	0.999132	0.999718	0.998257	0.919014	0.227356	0.994393
UID705	NOP56..10528./479	479	479-MEDPSISFSKPKKKKSFSKEELMSSDLEETA	10528	NOP56	NA	NA	0.564067	-0.444698	0.0984907	0.129215	0.380154	-0.093688	0.327588	NA	0.575792	-0.812335	0.0821519	NA	0.0332031	-0.418422	1.23143	-0.284798	-0.0780993	-0.194554	NA	-0.740617	0.042841	0.115345	0.302322	-0.118743	NA	-0.0834103	22		NOP56..10528.	0.992763	0.999999	1	0.99543	0.998358	0.999736	0.993859	0.999132	0.999718	0.998257	0.919014	0.227356	0.994393
UID706	NOP56..10528./480	480	480-DPSISFSKPKKKKSFSKEELMSSDLEETAGS	10528	NOP56	0.257871	-0.174013	-0.219203	-0.0518157	-0.277464	0.432799	0.264602	0.265993	0.981925	0.667225	0.0917048	-0.338429	0.295336	0.751746	-0.153615	-0.564091	0.881061	0.143039	-0.379328	-0.0634892	0.270656	-0.0727916	-0.332246	0.574668	0.500101	-0.545368	-0.260472	0.3368	28		NOP56..10528.	0.992763	0.999999	1	0.99543	0.998358	0.999736	0.993859	0.999132	0.999718	0.998257	0.919014	0.227356	0.994393
UID707	NOP56..10528./481	481	481-LEETAGSTSIPKRKKSTPKEETVNDPEEAGH	10528	NOP56	0.828804	-0.38574	0.0463119	-0.288887	0.0973186	0.297614	0.139891	0.112955	0.344296	0.216235	-0.0887094	0.329854	-0.293822	0.860237	-0.293251	-0.507517	1.60215	0.096176	0.351551	0.610136	2.11933	NA	-0.448136	0.327601	0.642426	0.142406	-0.395626	0.267057	27		NOP56..10528.	0.992763	0.999999	1	0.99543	0.998358	0.999736	0.993859	0.999132	0.999718	0.998257	0.919014	0.227356	0.994393
UID715	DDX3X..1654./486	486	486-HYKGSSRGRSKSSRFSGGFGARDYRQSSGAS	1654	DDX3X	0.336724	-0.175694	-1.09693	-0.708368	-0.664394	-0.405268	-1.05046	-0.121694	-0.515072	-1.51029	-0.889777	-0.0175905	-1.00448	-0.263436	-1.4652	0.914258	-1.17872	-0.499677	0.434766	-0.200258	-0.931806	-0.0407387	-1.29385	-1.11203	-0.358431	-0.322173	-2.1186	0.0149053	28		DDX3X..1654.	0.981	0.947	0.53	0.964	0.995	0.691	0.948	0.993	0.987	0.596	0.855	0.998	0.953
UID718	DDX3X..1654./489	489	489-SKPLPPSERLEQELFSGGNTGINFEKYDDIP	1654	DDX3X	-0.261461	-0.00843143	0.391309	-0.0307648	0.206336	0.196804	-0.0421367	0.081049	0.133368	0.554176	0.335008	0.259761	0.0983429	0.560363	0.13036	-0.117044	0.127855	-0.354537	0.0423136	-0.0290051	0.842367	-0.255497	0.157257	0.162976	0.196586	0.120238	-0.423143	0.128592	28		DDX3X..1654.	0.981	0.947	0.53	0.964	0.995	0.691	0.948	0.993	0.987	0.596	0.855	0.998	0.953
UID721	DDX3X..1654./490	490	490-FGARDYRQSSGASSSSFSSSRASSSRSGGGG	1654	DDX3X	-0.088028	-0.0550284	NA	-0.0760794	-0.01723	-0.00644016	-0.349779	0.288806	-0.0949805	0.721271	-0.189404	0.334733	0.197751	0.0656929	-0.0732298	0.249197	0.583714	-0.377603	0.442584	-0.0421927	NA	0.130616	0.0270777	0.0344706	-0.0453463	-0.195768	-0.0760765	-0.0151291	26		DDX3X..1654.	0.981	0.947	0.53	0.964	0.995	0.691	0.948	0.993	0.987	0.596	0.855	0.998	0.953
UID722	DDX3X..1654./491	491	491-RSDSRGKSSFFSDRGSGSRGRFDDRGRSDYD	1654	DDX3X	1.86569	0.449586	0.855707	-0.353293	1.03851	-0.638294	-0.786676	0.627917	0.547753	-0.972998	0.552176	-0.678391	0.237922	-0.0217597	-0.301056	-0.92701	0.118927	0.236662	1.94588	-0.264879	-0.0867542	1.23486	0.111928	-0.435124	-0.121411	-0.536166	-0.456672	-0.324352	28		DDX3X..1654.	0.981	0.947	0.53	0.964	0.995	0.691	0.948	0.993	0.987	0.596	0.855	0.998	0.953
UID726	PODXL..5420./494	494	494-EVMETSSEMQEKKVVSLNGELGDSWIVPLDN	5420	PODXL	-0.0270851	-1.56828	-1.93536	-0.821117	0.217467	-0.586829	-1.02339	0.772689	-1.33022	-0.721847	-0.546107	-1.215	0.120536	-0.820536	-1.62426	-1.23936	-1.91901	-1.16519	-1.69149	-1.13558	-1.66174	-0.992226	-2.15632	0.211094	-1.0927	-0.0705643	-1.83223	-1.29022	28		PODXL..5420.	0.0363511	0.339791	0.0770361	0.122202	0.102156	0.132259	0.0503911	0.0422539	0.207901	0.276151	0.371081	0.0325476	0.149184
UID730	KPNA4..3840./495	495	495-LLKRRNVPHEDICEDSDIDGDYRVQNTSLEA	3840	KPNA4	-0.371377	0.242748	-0.559783	0.241264	-0.130071	0.262572	-0.0126893	-0.0843089	-0.135662	-0.382896	-0.0823045	0.736456	-0.0230945	0.187881	-0.188879	0.208991	-0.399869	-0.271513	0.185556	0.0908313	-0.442913	0.138102	0.107006	-0.0232557	0.0348943	0.10499	0.0881128	-0.0797488	28		KPNA4..3840.	0.255288	0.233101	0.230618	0.266601	0.106137	0.266982	0.179111	0.174805	0.235389	0.137245	0.240897	0.398778	0.120196
UID731	KPNA4..3840./496	496	496-CEDSDIDGDYRVQNTSLEAIVQNASSDNQGI	3840	KPNA4	NA	NA	-0.0433483	0.0370274	0.491408	0.291525	-0.120803	0.0458527	0.379324	NA	0.178485	0.95822	-0.252521	NA	0.313807	1.28502	-0.0275226	-0.0537796	0.461956	1.12729	NA	0.272009	0.315022	0.408098	-0.112976	0.278382	NA	0.642377	22		KPNA4..3840.	0.255288	0.233101	0.230618	0.266601	0.106137	0.266982	0.179111	0.174805	0.235389	0.137245	0.240897	0.398778	0.120196
UID732	TRIM38..10475./497	497	497-ELKSHILELEEKCQGSAQKLLQNVNDTLSRS	10475	TRIM38	-0.411339	0.308665	-1.49583	-0.345204	-0.833634	-0.347193	-1.1305	-0.729807	-0.684213	-2.11952	-1.32539	-0.889736	-0.696157	-0.0332572	-1.10342	-1.08967	-0.153114	-0.473199	0.0558513	-0.477863	-2.29229	-1.49044	-0.588139	-0.688874	-0.232093	-0.811039	-1.67231	-0.879386	28		TRIM38..10475.	0.0435876	0.0672659	0.0768532	0.0670798	0.02684	0.0153937	0.0109974	0.0311203	0.0431682	0.01942	0.00109215	0.0206235	0.00681332
UID733	NFIB..4781./498	498	498-PAAGSRTWHERDQDMSSPTTMKKPEKPLFSS	4781	NFIB	-1.44326	0.0137889	-0.562898	0.296301	-0.271026	0.704903	1.37948	0.57689	-0.768475	0.101174	-0.713276	-0.439723	0.768449	1.08456	0.346174	-0.31772	0.182836	0.41321	-0.304899	0.166987	NA	-0.299925	0.624163	0.898314	-0.622537	0.423125	-0.804811	-0.245709	27		NFIB..4781.	0.0480772	0.0509801	0.0208356	0.0156002	0.056707	0.0300051	0.00766675	0.0124407	0.0168772	0.0102931	0.00828841	0.119337	0.159486
UID734	NFIB..4781./499	499	499-AAGSRTWHERDQDMSSPTTMKKPEKPLFSSA	4781	NFIB	-1.34534	1.71264	-0.384016	NA	-0.315346	0.239198	0.883369	0.388782	-0.476242	0.456854	-0.318211	NA	0.514147	0.649935	NA	NA	0.0650659	0.0809345	-0.125436	NA	-0.0462012	-0.419792	0.749769	NA	NA	NA	0.530171	NA	19		NFIB..4781.	0.0480772	0.0509801	0.0208356	0.0156002	0.056707	0.0300051	0.00766675	0.0124407	0.0168772	0.0102931	0.00828841	0.119337	0.159486
UID736	NFIB..4781./501	501	501-KKPEKPLFSSASPQDSSPRLSTFPQHHHPGI	4781	NFIB	-1.50871	0.508272	-0.914697	0.406782	-0.680959	1.03189	1.29154	0.743948	-0.928091	-0.100515	-1.39016	-0.431749	0.680645	0.756588	0.144984	-0.832197	0.0596838	-0.216061	-0.747862	0.33564	-0.190072	-0.736055	0.875382	0.633088	-1.21074	0.667524	0.327411	-0.244926	28		NFIB..4781.	0.0480772	0.0509801	0.0208356	0.0156002	0.056707	0.0300051	0.00766675	0.0124407	0.0168772	0.0102931	0.00828841	0.119337	0.159486
UID739	NFIB..4781./504	504	504-____MNSGVNLQRSLSSPPSSKRPKTISIDE	4781	NFIB	-0.837808	0.745747	0.330435	-0.299546	-0.0546889	0.918217	1.12389	0.226551	-0.234733	2.20242	-0.722603	-0.0542606	0.091217	0.856147	0.566522	-0.780132	0.120641	0.570666	-0.312434	0.428801	1.48486	-0.137247	0.756121	0.479817	-0.878174	0.981987	0.344629	0.304519	28		NFIB..4781.	0.0480772	0.0509801	0.0208356	0.0156002	0.056707	0.0300051	0.00766675	0.0124407	0.0168772	0.0102931	0.00828841	0.119337	0.159486
UID740	NFIB..4781./505	505	505-___MNSGVNLQRSLSSPPSSKRPKTISIDEN	4781	NFIB	-1.35243	0.718044	-0.785003	0.228984	-0.304448	0.843454	1.52161	0.595343	-1.51668	0.661971	-1.91653	-0.66568	0.716046	1.15807	0.604445	-0.47856	-0.635581	-0.093442	-0.767101	0.234999	1.09076	-0.114852	1.29898	0.537861	-1.24688	0.798315	0.0427966	NA	27		NFIB..4781.	0.0480772	0.0509801	0.0208356	0.0156002	0.056707	0.0300051	0.00766675	0.0124407	0.0168772	0.0102931	0.00828841	0.119337	0.159486
UID743	NFIB..4781./507	507	507-NMEPSPTGDFYPSPSSPAAGSRTWHERDQDM	4781	NFIB	-0.107874	0.115929	-0.291981	0.025846	-0.0534293	0.243066	0.566168	0.299416	-0.582388	0.82355	-0.452348	-0.391324	0.52495	0.28235	0.0546376	-0.32522	-0.368887	-0.38727	-0.368377	0.163475	-0.132224	-0.412938	0.0871732	0.670652	-0.173875	0.350278	0.343791	-0.296587	28		NFIB..4781.	0.0480772	0.0509801	0.0208356	0.0156002	0.056707	0.0300051	0.00766675	0.0124407	0.0168772	0.0102931	0.00828841	0.119337	0.159486
UID744	E2F3..1871./508	508	508-KTPKGKGRAALRSPDSPKTPKSPSEKTRYDT	1871	E2F3	NA	NA	0.84114	0.4559	NA	0.848228	0.455845	-0.00512886	0.330992	-0.0659237	1.23518	NA	0.663044	-0.0816059	NA	NA	1.05624	0.081742	0.257558	NA	NA	NA	0.160564	2.10306	NA	NA	NA	-0.173648	16		E2F3..1871.	0.31152	0.0595508	0.0776272	0.148208	0.238597	0.163937	0.306609	0.233444	0.183163	0.387516	0.00610022	0.0212159	0.127393
UID749	PIK3C2B..5287./509	509	509-SSPGPGDIEGSCKKLSPPPLPPRASIWDTPP	5287	PIK3C2B	-0.288752	-1.96158	1.05546	0.183402	-0.236803	0.124146	0.169379	0.819606	0.727452	0.536244	0.987676	0.473671	0.658964	-0.229962	1.83373	-0.946979	-0.14781	0.409858	0.836361	-0.405046	0.853615	0.927697	0.391125	0.365032	0.0692736	0.383447	0.757527	-0.19107	28		PIK3C2B..5287.	0.0730118	0.0696804	0.0215249	0.00936964	0.00628412	0.00578902	0.00728885	0.00696439	0.0195506	0.0126011	0.00386806	0.05451	0.00897146
UID751	PIK3C2B..5287./510	510	510-VKQFFALNGSCRLPLSPSLLVKGIVPRDCSY	5287	PIK3C2B	-0.078759	-0.848995	0.069324	0.621254	-0.383972	0.3887	-0.39132	0.407155	1.03102	1.23163	0.454625	0.512205	0.626897	0.0207963	0.797318	-0.263339	0.266177	0.246278	0.538229	0.525339	0.362187	0.00194454	0.308881	0.342386	0.330086	0.0145356	0.348594	0.460286	28		PIK3C2B..5287.	0.0730118	0.0696804	0.0215249	0.00936964	0.00628412	0.00578902	0.00728885	0.00696439	0.0195506	0.0126011	0.00386806	0.05451	0.00897146
UID754	SCD..6319./513	513	513-GWLLVRKHPAVKEKGSTLDLSDLEAEKLVMF	6319	SCD	0.827478	-0.632172	0.397044	0.0694854	1.16166	-0.0776131	-0.752499	-0.715749	-0.376527	-0.796344	-0.427819	-0.55473	-0.409431	-0.873163	-0.251226	0.0823962	0.0250109	-0.523737	0.429774	-0.496147	0.366049	0.902742	0.842714	-0.61298	0.0387332	2.09691	-0.340125	0.0950117	28		SCD..6319.	0.958832	0.830984	0.974559	0.694495	0.953697	0.971334	0.957427	0.999997	0.99279	0.749559	0.999906	0.972032	0.909982
UID755	DLGAP1..9229./514	514	514-SHSYLRAVSEVSINRSLDSLDPAGLLTSPKF	9229	DLGAP1	-0.390388	2.93375	0.082181	NA	-0.0105896	NA	NA	NA	NA	0.119702	-0.123145	NA	NA	-0.250907	-0.359642	0.0443811	-0.0202818	-0.221801	-0.0864601	NA	0.13581	0.0193973	-0.256528	NA	NA	0.0491533	0.0350432	NA	17		DLGAP1..9229.	0.0155139	0.0051752	0.0136934	0.0548212	0.0504749	0.00675462	0.00405295	0.011982	0.00824647	0.00422019	0.00418117	0.00714656	0.00858386
UID763	PLPP3..8613./518	518	518-TTLSLPAPAIRKEILSPVDIIDRNNHHNMM_	8613	PLPP3	1.28211	-0.0584562	1.60892	0.548887	0.471224	0.255038	-0.113188	NA	0.356582	1.15524	-0.084012	0.524718	NA	0.170256	-0.00813484	0.813485	-0.0854025	NA	0.0539932	0.103502	-0.447665	0.57212	0.00504875	0.724482	0.925032	0.275436	-0.23277	0.416123	25		PLPP3..8613.	0.0396	0.00784	0.0281	0.029	0.013	0.045	0.0133	0.0446	0.0174	0.036	0.128	0.25	0.00747
UID765	ARID1A..8289./519	519	519-TPQPTATPTLNQLLTSPSSARGYQGYPGGDY	8289	ARID1A	0.23898	0.0566344	-0.115254	-0.112435	-0.0500348	-0.144136	-0.0168724	-0.131006	-0.319446	-0.40304	-0.223418	-0.32831	-0.155297	-0.471459	-0.34253	-0.110569	-0.15078	-0.148191	-0.227995	-0.272448	-0.109655	-0.0675443	0.04197	-0.166714	0.302067	0.0482969	-0.0881658	-0.159568	28		ARID1A..8289.	0.074	0.0523	0.761	0.14	0.387	0.461	0.279	0.012	0.46	0.0458	0.191	0.0504	0.087
UID766	ARID1A..8289./520	520	520-SSEAIKESSKFPFGISPAQSHRNIKILEDEP	8289	ARID1A	0.328769	-0.15853	-0.079392	-0.322583	-0.015007	0.0541885	0.186764	0.0247698	0.26211	-0.0627806	-0.181257	0.322228	-0.343516	-0.435454	0.0278811	0.173193	0.172436	-0.00114965	-0.190932	-0.161667	-0.146974	NA	-0.210238	-0.503752	0.204352	-0.0177603	-0.0635514	-0.0898476	27		ARID1A..8289.	0.074	0.0523	0.761	0.14	0.387	0.461	0.279	0.012	0.46	0.0458	0.191	0.0504	0.087
UID767	ARID1A..8289./521	521	521-QTAYSQQRFPPPQELSQDSFGSQASSAPSMT	8289	ARID1A	0.580762	0.178037	0.408563	0.0270066	0.230399	0.098859	0.699028	0.123846	0.319001	0.369653	0.198103	-0.0969214	0.158083	-0.11949	0.480668	0.370339	0.419798	0.35568	0.0082372	-0.0660408	NA	0.132378	0.502504	-0.0234528	0.253758	0.531988	0.60171	0.146637	27		ARID1A..8289.	0.074	0.0523	0.761	0.14	0.387	0.461	0.279	0.012	0.46	0.0458	0.191	0.0504	0.087
UID768	ARID1A..8289./522	522	522-FSPHTSPHLPGIRGPSPSPVGSPASVAQSRS	8289	ARID1A	-0.132247	0.292249	0.386783	0.0647562	0.0978705	0.519291	0.142761	0.289553	0.170102	-0.115246	-0.0951091	-0.105693	0.0887664	-0.276153	0.143895	-0.0160739	0.484786	-0.0120533	-0.110582	-0.662632	0.0181599	-0.0104043	0.470049	-0.450149	0.239025	0.0453148	-0.192476	-0.0305773	28		ARID1A..8289.	0.074	0.0523	0.761	0.14	0.387	0.461	0.279	0.012	0.46	0.0458	0.191	0.0504	0.087
UID769	ARID1A..8289./523	523	523-PHTSPHLPGIRGPSPSPVGSPASVAQSRSGP	8289	ARID1A	NA	NA	NA	-0.0344048	0.161929	0.197002	NA	-0.029851	0.0219696	-0.0237474	NA	0.148626	-0.0921183	-0.065444	0.194719	0.181896	NA	-0.10826	NA	-0.218524	NA	-0.0700493	NA	-0.137029	0.27788	-0.10897	NA	-0.0222095	18		ARID1A..8289.	0.074	0.0523	0.761	0.14	0.387	0.461	0.279	0.012	0.46	0.0458	0.191	0.0504	0.087
UID772	ARID1A..8289./524	524	524-PQMPQYSSPQPGSALSPRQPSGGQIHTGMGS	8289	ARID1A	0.369039	-0.00230805	0.234862	0.246366	0.00862312	-0.0739296	-0.00821336	0.00108242	0.209947	-0.331622	0.0132257	-0.341223	-0.385834	0.0461617	0.189312	-0.22976	0.0117497	-0.134789	-0.226593	-0.654444	0.000570297	-0.03897	0.283774	-0.0970993	0.0252107	-0.121325	0.113398	-0.141534	28		ARID1A..8289.	0.074	0.0523	0.761	0.14	0.387	0.461	0.279	0.012	0.46	0.0458	0.191	0.0504	0.087
UID773	ARID1A..8289./525	525	525-PNRSAYPPPAPAYALSSPRGGTPGSGAAAAA	8289	ARID1A	0.0988622	-0.0280526	-0.115411	-0.0292132	-0.356392	0.123461	-0.0866152	0.131985	0.0481091	-0.211553	-0.315177	-0.347614	-0.17493	-0.240861	-0.232138	-0.239992	-0.0141828	-0.172209	-0.00363588	-0.347269	-0.460297	-0.131742	0.00777769	-0.0668054	0.0490122	0.00763512	-0.396204	0.0795994	28		ARID1A..8289.	0.074	0.0523	0.761	0.14	0.387	0.461	0.279	0.012	0.46	0.0458	0.191	0.0504	0.087
UID774	ARID1A..8289./526	526	526-NRSAYPPPAPAYALSSPRGGTPGSGAAAAAG	8289	ARID1A	NA	0.188566	-0.0714793	-0.0881081	-0.634394	0.195444	0.100927	0.340619	0.022886	-0.188601	-0.228533	NA	-0.044399	0.187927	-0.52332	-0.144611	0.0450733	-0.137296	0.0944238	NA	NA	NA	0.108438	-0.151426	NA	0.131136	NA	0.0244465	21		ARID1A..8289.	0.074	0.0523	0.761	0.14	0.387	0.461	0.279	0.012	0.46	0.0458	0.191	0.0504	0.087
UID775	ARID1A..8289./527	527	527-AASGGAQQRSHHAPMSPGSSGGGGQPLARTP	8289	ARID1A	0.0770965	0.13027	0.143576	0.452508	0.485168	NA	0.1005	-0.115868	NA	0.202436	0.705674	-0.726732	0.461121	-0.159021	0.444511	0.236064	0.704507	0.427949	-0.391524	-0.477377	0.249005	NA	1.04386	-0.142546	0.297284	-0.104585	0.678542	NA	24		ARID1A..8289.	0.074	0.0523	0.761	0.14	0.387	0.461	0.279	0.012	0.46	0.0458	0.191	0.0504	0.087
UID776	ARID1A..8289./528	528	528-GGAQQRSHHAPMSPGSSGGGGQPLARTPQPS	8289	ARID1A	0.203676	NA	0.497126	-0.0192354	-0.0605373	0.302343	0.325452	-0.00533962	-0.0205626	NA	0.341104	-0.790874	0.0146208	-0.850616	-0.168744	-0.321812	0.0225825	-0.128172	-0.471243	-1.13812	0.103569	-0.0354376	0.680328	-0.884529	0.31319	-0.187368	0.449224	-0.573061	26		ARID1A..8289.	0.074	0.0523	0.761	0.14	0.387	0.461	0.279	0.012	0.46	0.0458	0.191	0.0504	0.087
UID778	ARID1A..8289./530	530	530-PHSQIPPLPGMSRSNSVGIQDAFNDGSDSTF	8289	ARID1A	0.549803	-0.397787	0.356735	-0.270345	-0.0915521	0.183772	0.580883	0.24933	0.0791577	-0.269745	0.092979	0.593555	-0.293569	0.184476	-0.169325	0.0578607	0.666791	0.196033	-0.17057	-0.719214	0.350396	0.0879126	0.240691	-0.522716	0.481745	0.152072	0.38079	0.322828	28		ARID1A..8289.	0.074	0.0523	0.761	0.14	0.387	0.461	0.279	0.012	0.46	0.0458	0.191	0.0504	0.087
UID779	ARID1A..8289./531	531	531-APLPRPMENRTSPSKSPFLHSGMKMQKAGPP	8289	ARID1A	0.613162	0.095571	NA	NA	NA	NA	0.303264	NA	NA	NA	-0.147671	0.309947	NA	NA	-0.0489368	0.391768	0.762711	NA	0.123606	-0.760159	NA	NA	0.439845	NA	0.368579	0.0104876	-0.0943804	NA	14		ARID1A..8289.	0.074	0.0523	0.761	0.14	0.387	0.461	0.279	0.012	0.46	0.0458	0.191	0.0504	0.087
UID783	ARID1A..8289./533	533	533-VGDPGQRTLLDPGRFSKVSSPAPMEGGEEEE	8289	ARID1A	-0.274176	-0.495728	0.258441	-0.791884	0.846622	-0.108296	0.0129671	0.487771	0.37221	1.0094	-0.00552924	-0.243981	-0.985286	-1.63266	-0.379703	-1.02453	0.972156	-0.312415	-0.318702	-1.89029	0.104843	-0.0894995	-0.187319	-2.42304	0.0553716	0.42956	-0.343695	-0.0215136	28		ARID1A..8289.	0.074	0.0523	0.761	0.14	0.387	0.461	0.279	0.012	0.46	0.0458	0.191	0.0504	0.087
UID784	ARID1A..8289./534	534	534-SGGGGQPLARTPQPSSPMDQMGKMRPQPYGG	8289	ARID1A	0.0631225	0.318021	NA	-0.152471	NA	0.0791559	0.242175	0.0878487	0.531712	-0.614214	0.198197	-0.446838	-0.296983	-0.800767	0.303978	0.378984	-0.0488987	-0.308458	0.00764084	-0.731205	-0.399513	NA	0.119733	-1.54475	0.00069046	-0.0117254	-0.0397844	0.173234	25		ARID1A..8289.	0.074	0.0523	0.761	0.14	0.387	0.461	0.279	0.012	0.46	0.0458	0.191	0.0504	0.087
UID788	ARID1A..8289./536	536	536-GQRTLLDPGRFSKVSSPAPMEGGEEEEELLG	8289	ARID1A	-0.0322022	0.215313	0.362986	-0.121949	0.411022	0.291721	0.177876	0.228405	0.330919	0.0440243	0.0555733	0.0691856	-0.0426741	-0.451022	0.122195	-0.106347	0.494249	-0.399422	-0.218469	-0.711206	0.298343	0.0256484	0.199166	-1.07231	0.533018	0.232732	0.245454	0.127528	28		ARID1A..8289.	0.074	0.0523	0.761	0.14	0.387	0.461	0.279	0.012	0.46	0.0458	0.191	0.0504	0.087
UID790	C2CD2L..9854./537	537	537-GPAATMAVELHYEEGSPRNLGTPTSSTPRPS	9854	C2CD2L	0.0805919	-0.426819	0.38138	0.216752	0.0356105	-0.210247	0.145786	0.00531292	0.264076	0.362734	0.258127	-0.0867577	0.148011	-0.374758	0.638645	0.361494	-0.0949652	0.125489	-0.284632	-0.0895257	0.602945	0.274052	0.573931	-0.0649338	0.0463843	0.229187	0.396811	0.0991732	28		C2CD2L..9854.	0.044	0.156	0.0747	0.0694	0.0408	0.0992	0.0236	0.0145	0.0711	0.0122	0.0218	0.0359	0.0203
UID791	C2CD2L..9854./538	538	538-IFRRRPRQKEAGLSQSHDDLSNATATPSVRK	9854	C2CD2L	-0.425402	-0.333947	-0.167267	0.0521557	0.170793	0.192338	0.37537	0.202233	0.806988	0.660592	0.213485	0.467595	0.35651	0.195444	0.404983	0.226013	0.11747	0.264258	-0.578356	0.171106	0.237963	0.288464	0.126288	0.220749	0.12874	-0.351	-0.184217	0.254486	28		C2CD2L..9854.	0.044	0.156	0.0747	0.0694	0.0408	0.0992	0.0236	0.0145	0.0711	0.0122	0.0218	0.0359	0.0203
UID794	C2CD2L..9854./539	539	539-QSRPRIDGKLDSPSRSPSKVEVTEKTTTVLS	9854	C2CD2L	-0.347366	-0.860552	-0.57747	0.0869203	0.0339718	0.0516038	0.0943969	-0.287684	-0.0456147	-0.305073	-0.395015	0.0364892	-0.348922	0.216897	-0.134993	0.689171	-0.0304001	0.405155	-0.645951	0.772064	-0.0156962	0.0226094	-0.205497	0.0812988	-0.149741	-0.225813	-0.711989	0.371606	28		C2CD2L..9854.	0.044	0.156	0.0747	0.0694	0.0408	0.0992	0.0236	0.0145	0.0711	0.0122	0.0218	0.0359	0.0203
UID799	C2CD2L..9854./541	541	541-CGDTELLGQATLPVGSPSRPLSRRQLCPLTP	9854	C2CD2L	-0.109481	-0.205561	-0.0121384	-0.0554166	-0.112522	0.00376844	-0.309792	-0.138781	0.187283	0.342088	-0.0517864	0.141363	0.0267427	0.0433068	0.110924	0.638197	0.103389	0.17218	-0.508804	-0.0423584	-0.167671	0.174909	0.0137429	-0.263742	0.0885143	-0.202698	-0.201388	0.0675189	28		C2CD2L..9854.	0.044	0.156	0.0747	0.0694	0.0408	0.0992	0.0236	0.0145	0.0711	0.0122	0.0218	0.0359	0.0203
UID808	TXNDC9..10190./544	544	544-ETLEWRLGSSDILNYSGNLMEPPFQNQKKFG	10190	TXNDC9	0.92191	-0.372458	-0.090466	-1.33779	-0.789133	-0.27319	0.411504	0.495943	0.474358	-0.934178	0.366357	0.29692	-1.09491	-1.30057	-0.411129	0.457774	-0.0439967	0.681551	0.244537	-1.02348	0.133228	0.107111	-0.610995	-1.50313	0.441831	0.0321267	0.228582	0.506498	28		TXNDC9..10190.	0.389855	0.336847	0.114623	0.253711	0.392168	0.280199	0.0633314	0.115529	0.0904833	0.506199	0.0621831	0.863711	0.299151
UID813	SOCS6..9306./546	546	546-KISLKTLRKSFNLNKSKEETDFMVVQQPSLA	9306	SOCS6	0.480605	-0.356277	-0.50888	-0.396584	0.853246	-0.0404032	-0.609171	0.730475	-0.0976691	-0.922201	-0.192431	-0.511866	0.990143	-0.525212	-0.114708	-1.15017	-1.06925	-0.323973	-0.833541	-0.0240073	-0.168909	-0.21624	-0.190686	-0.0940297	-0.744453	-0.550341	0.0312967	-0.819249	28		SOCS6..9306.	0.0216176	0.129555	0.0922197	0.0460768	0.0201469	0.018565	0.067999	0.0530276	0.063803	0.0292201	0.00867917	0.0170648	0.0107199
UID815	TRAFD1..10906./548	548	548-SCNPSRALPSLNTGSSSPRGVEEPDVIFQNF	10906	TRAFD1	-0.0438533	-0.00787258	-0.0204577	0.257493	-0.185377	-0.32652	-0.264904	-0.37073	-0.192249	-0.203365	0.174333	0.729322	-0.356959	-0.0769577	-0.134552	0.0539408	0.193034	0.217916	0.032342	-0.227261	-0.297825	NA	0.134211	-0.220312	-0.252786	-0.113854	-0.0915556	0.509949	27		TRAFD1..10906.	0.0427547	0.0254943	0.0225135	0.0433435	0.0242297	0.0853014	0.0182695	0.0266745	0.0393902	0.044258	0.00853431	0.0384427	0.0343379
UID816	TRAFD1..10906./549	549	549-CNPSRALPSLNTGSSSPRGVEEPDVIFQNFL	10906	TRAFD1	0.105312	0.0537909	-0.302357	0.143802	-0.056359	-0.952046	-0.538179	-1.11589	-0.257901	-0.58202	-0.00674677	0.953277	-0.960099	-0.134016	-0.574377	-0.188001	0.398835	0.483094	-0.472444	-0.0342437	-0.243598	-0.112096	0.105517	-0.349812	-0.0799077	0.134764	0.0966512	0.434691	28		TRAFD1..10906.	0.0427547	0.0254943	0.0225135	0.0433435	0.0242297	0.0853014	0.0182695	0.0266745	0.0393902	0.044258	0.00853431	0.0384427	0.0343379
UID817	TRAFD1..10906./550	550	550-VTEGIPRLDSQPQETSPELPRRRVRHQGDLS	10906	TRAFD1	0.0915001	0.249802	0.0272573	0.15658	0.0536378	-1.25342	-0.596016	-0.601909	-0.285984	-0.615511	0.0561646	0.715447	-0.412173	0.0234973	-0.439176	-0.0791639	-0.141173	0.416815	-0.258068	-0.189805	0.0015049	0.0218534	0.0579044	-0.190703	-0.0699577	0.375567	0.0790579	0.424101	28		TRAFD1..10906.	0.0427547	0.0254943	0.0225135	0.0433435	0.0242297	0.0853014	0.0182695	0.0266745	0.0393902	0.044258	0.00853431	0.0384427	0.0343379
UID819	TRAFD1..10906./551	551	551-INNMTATYNQLSRSTSGPRPGCQPSSPCVPK	10906	TRAFD1	2.11043	NA	NA	-0.260609	0.249751	-0.589211	0.0699673	0.131341	-0.517415	NA	NA	1.41715	-0.0930686	0.153385	0.564508	-0.315336	NA	NA	NA	-0.273467	0.456728	0.905113	NA	-0.503319	0.0582709	-0.12774	0.234881	0.249776	20		TRAFD1..10906.	0.0427547	0.0254943	0.0225135	0.0433435	0.0242297	0.0853014	0.0182695	0.0266745	0.0393902	0.044258	0.00853431	0.0384427	0.0343379
UID820	TRAFD1..10906./552	552	552-LSRSTSGPRPGCQPSSPCVPKLSNSDSQDIQ	10906	TRAFD1	0.0593708	0.371965	-0.775141	-0.382118	-0.254943	-0.999101	-1.27176	-1.28715	-0.622376	-0.742906	-0.594764	0.431146	-1.17991	-0.385524	-1.02585	-0.20174	0.00149202	-0.289229	-0.379099	-0.29393	-1.20451	-0.704457	-0.533187	-0.696852	-0.401324	-0.259436	-0.962947	0.0907656	28		TRAFD1..10906.	0.0427547	0.0254943	0.0225135	0.0433435	0.0242297	0.0853014	0.0182695	0.0266745	0.0393902	0.044258	0.00853431	0.0384427	0.0343379
UID822	DYNC1I1..1780./554	554	554-SIGISPEPPLVPTPMSPSSKSVSTPSEAGSQ	1780	DYNC1I1	-0.741385	-0.791054	-0.160109	-0.593007	-0.15376	-0.641866	-0.0538287	-0.730051	0.16169	0.0211723	-0.446289	-0.456087	-0.643829	-1.63245	-0.725697	-0.210958	2.73934	-0.237792	-0.135036	-0.00459123	NA	-0.883327	-0.286303	-0.867008	1.22713	-0.302282	-0.295033	-0.766678	27		DYNC1I1..1780.	0.0194885	0.0152708	0.00750046	0.0150524	0.0489352	0.0363119	0.0211448	0.0172174	0.0290094	0.023906	0.0310337	0.00587971	0.0409999
UID824	CIT..11113./555	555	555-YATHFTEAFCRDKMNSPGLQTKEPSSSLHLE	11113	CIT	0.816785	-0.78595	0.23553	-0.179049	NA	-0.113306	-0.301557	-0.0176291	0.488254	-0.217718	0.0682361	0.372437	-0.375329	-0.111858	-0.414858	2.26716	0.505966	0.551318	0.499422	0.576446	NA	NA	-0.335538	0.680176	0.0708475	0.769502	-0.853638	0.369585	25		CIT..11113.	0.532619	0.204671	0.952858	0.880556	0.215852	0.19365	0.0810171	0.816115	0.820282	0.535083	0.321147	0.429984	0.571968
UID825	CIT..11113./556	556	556-PHRYREGRTELRRDKSPGRPLEREKSPGRML	11113	CIT	0.405305	-0.165226	0.140537	-0.0906329	-0.818091	0.175709	0.0195036	0.0619109	0.634845	-0.492855	0.512064	1.10863	-0.661098	-0.505728	-0.159357	2.52336	0.662006	1.07151	0.627746	-0.182814	-0.585054	-0.0209284	-0.260709	0.43178	0.160622	1.04483	-0.239323	0.555394	28		CIT..11113.	0.532619	0.204671	0.952858	0.880556	0.215852	0.19365	0.0810171	0.816115	0.820282	0.535083	0.321147	0.429984	0.571968
UID826	CIT..11113./557	557	557-VSREKAEADAKLLGNSLLKLEGDDRLDMNCT	11113	CIT	-0.465396	-0.450398	-0.21584	-1.05991	-0.296913	0.257524	-0.868307	0.877315	-0.279237	-0.289565	0.455012	0.65552	-0.442825	-0.737501	0.265376	1.23938	0.389603	0.542829	0.131847	-0.60075	0.189546	0.0671072	-0.425363	-0.254424	-0.531111	0.37518	-0.424165	0.144891	28		CIT..11113.	0.532619	0.204671	0.952858	0.880556	0.215852	0.19365	0.0810171	0.816115	0.820282	0.535083	0.321147	0.429984	0.571968
UID832	CIT..11113./558	558	558-MMNQLEEDLVSARRRSDLYESELRESRLAAE	11113	CIT	0.116342	-0.0883609	-0.217626	-0.350205	-0.374797	0.32464	-0.449119	0.523937	0.438914	-0.476861	0.487747	0.0333834	-0.181551	-0.353454	0.95493	1.77048	0.17178	0.852307	0.0467431	-0.392886	0.340023	0.7648	0.870385	0.486148	0.115109	1.04904	0.377298	0.73604	28		CIT..11113.	0.532619	0.204671	0.952858	0.880556	0.215852	0.19365	0.0810171	0.816115	0.820282	0.535083	0.321147	0.429984	0.571968
UID833	CIT..11113./559	559	559-GPPTYNEHITKRVASSPAPPEGPSHPREPST	11113	CIT	0.42748	0.388893	0.365618	-0.412018	-0.413049	-0.236589	-0.483535	NA	-0.123218	0.168404	0.230505	0.268853	NA	NA	-0.0828931	1.32535	0.298608	0.7155	-0.0895681	-0.519095	NA	-0.613951	-0.00487065	-0.100647	-0.0730586	-0.0129102	-0.186595	-0.136977	24		CIT..11113.	0.532619	0.204671	0.952858	0.880556	0.215852	0.19365	0.0810171	0.816115	0.820282	0.535083	0.321147	0.429984	0.571968
UID834	CIT..11113./560	560	560-CHKMEQEMTRLHRRVSEVEAVLSQKEVELKA	11113	CIT	0.221265	-0.627698	-0.129646	-0.0434915	-0.081172	0.208193	0.222644	-0.0864986	0.816536	0.176671	0.0562689	1.82037	-0.046497	-0.372877	0.0441281	2.83189	1.19504	0.926007	0.21194	0.452212	0.224975	0.20539	0.00556676	0.586717	-0.0780795	0.471259	0.011958	0.763355	28		CIT..11113.	0.532619	0.204671	0.952858	0.880556	0.215852	0.19365	0.0810171	0.816115	0.820282	0.535083	0.321147	0.429984	0.571968
UID835	CIT..11113./561	561	561-LGILGRSESVVSGLDSPAKTSSMEKKLLIKS	11113	CIT	-0.174978	0.118861	0.0353171	-0.348012	-0.369247	-0.0687067	-0.138605	-0.267814	0.277	-0.175934	0.0857654	0.625868	-0.539847	-0.325832	-0.0876872	1.27565	0.297419	0.492259	0.192505	-0.0353068	-0.606345	-0.130775	-0.296412	0.0739063	-0.230434	0.606627	-0.46267	0.529678	28		CIT..11113.	0.532619	0.204671	0.952858	0.880556	0.215852	0.19365	0.0810171	0.816115	0.820282	0.535083	0.321147	0.429984	0.571968
UID837	COPE..11316./562	562	562-______MAPPAPGPASGGSGEVDELFDVKNA	11316	COPE	NA	-0.0275173	0.547552	0.0772114	0.110936	0.0933647	NA	NA	0.177398	0.166574	0.227407	0.219915	NA	NA	0.447677	0.401235	-0.0738249	-0.0694733	-0.0923195	0.180541	NA	0.00637245	-0.0685191	0.342115	0.0262299	0.175104	NA	0.217595	21		COPE..11316.	0.968842	0.971479	0.835312	0.990021	0.998953	0.999893	0.972464	0.999989	0.999484	0.974113	0.961719	0.0713634	0.997673
UID839	COPE..11316./563	563	563-VRMFADYLAHESRRDSIVAELDREMSRSVDV	11316	COPE	0.125067	-0.657932	-0.0133643	0.785411	-0.282478	-0.0463125	0.421603	-0.437936	0.589134	0.702698	-0.255443	1.17299	0.194989	-0.39051	-0.221945	1.60769	1.41662	0.944036	-0.0895467	0.338464	0.0361238	-0.342319	0.043694	-0.00618839	-0.270597	-0.357434	0.38491	0.036857	28		COPE..11316.	0.968842	0.971479	0.835312	0.990021	0.998953	0.999893	0.972464	0.999989	0.999484	0.974113	0.961719	0.0713634	0.997673
UID840	CDC42EP2..10435./564	564	564-TRTATVCGRELPDGPSPLLKNAISLPVIGGP	10435	CDC42EP2	1.68372	-0.956782	NA	-0.672801	-0.112568	-0.150039	-0.566541	0.0684624	-0.404998	0.0483236	-0.767432	0.483432	-0.562827	-0.344933	-0.369525	0.827759	-0.605839	-0.108243	-0.158462	0.657828	NA	0.0172386	-0.310927	0.116844	-0.72337	-0.334486	-0.353456	0.44353	26		CDC42EP2..10435.	0.091263	0.155525	0.1902	0.400254	0.129246	0.195398	0.274329	0.112759	0.104064	0.110999	0.111368	0.0584487	0.117135
UID841	CDC42EP2..10435./565	565	565-RELPDGPSPLLKNAISLPVIGGPQALTLPTA	10435	CDC42EP2	0.2947	-0.762463	-0.623886	-0.938423	-0.455268	-0.538269	-0.282329	0.610514	-1.06316	-0.439073	-0.929744	1.37048	-1.20877	-0.80934	-0.389527	1.67846	-0.854193	-0.537522	-0.367905	0.0519547	-0.774532	0.340566	-0.834762	-0.689006	-0.802856	-0.502658	-0.681936	0.30167	28		CDC42EP2..10435.	0.091263	0.155525	0.1902	0.400254	0.129246	0.195398	0.274329	0.112759	0.104064	0.110999	0.111368	0.0584487	0.117135
UID843	AP3D1..8943./566	566	566-AVFHEEEQRRPKHRPSEADEEELARRREARK	8943	AP3D1	1.13815	0.141916	0.0945371	-0.29691	0.539599	0.116773	0.197041	0.00211875	0.445592	1.21195	-0.0600114	-0.0553188	-0.194136	-0.138254	0.144039	0.136688	1.33647	-0.115933	0.16927	0.433102	1.031	0.0127586	0.355215	0.513535	-0.142449	-0.282598	0.410408	-0.478797	28		AP3D1..8943.	0.0673999	0.0124293	0.430242	0.0503526	0.0786858	0.0148663	0.0584519	0.103645	0.0435772	0.0253631	0.0135988	0.0890786	0.0566665
UID847	AP3D1..8943./568	568	568-EKLPIQKHRNTETSKSPEKDVPMVEKKSKKP	8943	AP3D1	0.0576498	0.627842	0.0600535	0.00838836	0.570896	0.283965	0.0191806	-0.501519	-0.13613	-0.430262	0.287151	0.434458	-0.242092	-0.122049	-0.0708405	1.15029	0.123619	0.283885	0.118484	-0.163696	-0.792	0.0138076	-0.168841	-0.661486	0.0398661	-0.0447369	-0.412166	0.0674349	28		AP3D1..8943.	0.0673999	0.0124293	0.430242	0.0503526	0.0786858	0.0148663	0.0584519	0.103645	0.0435772	0.0253631	0.0135988	0.0890786	0.0566665
UID848	AP3D1..8943./569	569	569-KQEQANNPFYIKSSPSPQKRYQDTPGVEHIP	8943	AP3D1	NA	0.448681	-0.0977616	NA	0.265608	-0.0393643	-0.537574	-0.239151	-0.356097	0.433814	-0.187364	NA	-0.352001	NA	0.273433	1.39351	0.0641868	0.289119	0.258164	NA	NA	NA	0.19506	NA	NA	0.889122	NA	NA	17		AP3D1..8943.	0.0673999	0.0124293	0.430242	0.0503526	0.0786858	0.0148663	0.0584519	0.103645	0.0435772	0.0253631	0.0135988	0.0890786	0.0566665
UID853	ABLIM1..3983./572	572	572-NGRDCLCQLCAQPMSSSPKETTFSSNCAGCG	3983	ABLIM1	-0.183471	-0.254498	0.637972	-0.0722783	-0.182091	0.197499	0.436133	0.431249	0.544627	0.179987	0.834398	-0.238792	-0.310999	-0.304878	1.15864	-0.261123	0.943657	-0.385935	0.183018	-0.565013	0.384384	0.780416	0.317162	-0.547055	-0.0612583	0.604258	-0.230903	-0.0251751	28		ABLIM1..3983.	0.0111695	0.0273411	0.0269318	0.100749	0.0150057	0.00419997	0.00700495	0.012614	0.00756799	0.0136255	0.0223551	0.00737919	0.00625564
UID854	ABLIM1..3983./573	573	573-GRDCLCQLCAQPMSSSPKETTFSSNCAGCGR	3983	ABLIM1	NA	-0.102301	0.275719	0.265234	0.133907	0.149237	NA	0.520173	0.826758	-0.136711	0.506376	NA	-0.271891	-0.163483	0.552577	0.00200272	0.627404	-0.320468	0.099596	NA	NA	NA	0.572052	-0.331371	NA	0.343437	NA	0.217592	20		ABLIM1..3983.	0.0111695	0.0273411	0.0269318	0.100749	0.0150057	0.00419997	0.00700495	0.012614	0.00756799	0.0136255	0.0223551	0.00737919	0.00625564
UID856	ABLIM1..3983./574	574	574-QLILKEEMEKESRERSSLLASRYDSPINSAS	3983	ABLIM1	-0.144892	-0.255901	0.369733	-0.5237	-0.162453	-0.165552	NA	NA	0.121839	0.430726	0.0228004	-0.237755	NA	-0.688415	0.0992866	-0.299592	0.398496	-0.0829525	0.339314	-0.97108	0.224572	1.13363	0.0940919	-1.15983	-0.969463	0.918127	0.0264516	-0.31521	25		ABLIM1..3983.	0.0111695	0.0273411	0.0269318	0.100749	0.0150057	0.00419997	0.00700495	0.012614	0.00756799	0.0136255	0.0223551	0.00737919	0.00625564
UID857	ABLIM1..3983./575	575	575-LILKEEMEKESRERSSLLASRYDSPINSASH	3983	ABLIM1	-0.452191	-0.274109	0.377956	-0.505973	-0.114975	-0.177222	-0.213104	-0.169077	-0.0329289	0.0445318	NA	0.328631	-0.417099	-0.417879	NA	NA	NA	-0.395664	NA	-0.311618	0.21877	1.13224	NA	-0.795732	0.10567	NA	0.0712917	0.0840397	21		ABLIM1..3983.	0.0111695	0.0273411	0.0269318	0.100749	0.0150057	0.00419997	0.00700495	0.012614	0.00756799	0.0136255	0.0223551	0.00737919	0.00625564
UID858	ABLIM1..3983./576	576	576-LPDGHMPAMRMDRGVSMPNMLEPKIFPYEML	3983	ABLIM1	-0.541149	-0.339094	1.39829	-0.101031	0.125269	-0.0683799	-0.132138	0.934521	0.0522081	0.45056	0.745939	-0.238123	-0.337878	-0.205473	0.0291618	-0.734116	0.836735	0.0578192	0.0177323	-1.1662	1.05435	0.537023	-0.151305	-1.13565	-0.603736	0.600883	-0.458551	-0.326629	28		ABLIM1..3983.	0.0111695	0.0273411	0.0269318	0.100749	0.0150057	0.00419997	0.00700495	0.012614	0.00756799	0.0136255	0.0223551	0.00737919	0.00625564
UID859	ABLIM1..3983./577	577	577-ASLPGYGRNGLHRPVSTDFAQYNSYGDVSGG	3983	ABLIM1	-0.409464	-0.104149	0.315187	0.0376318	-0.0955596	-0.0297699	0.137797	0.222095	0.0181892	-0.078943	0.033896	-0.443395	0.028178	-0.125267	0.00896676	-0.346276	-0.00915241	-0.428687	-0.340333	-0.129301	0.34589	0.23556	0.0609128	-0.0898218	-0.0863825	0.387307	0.403421	-0.263747	28		ABLIM1..3983.	0.0111695	0.0273411	0.0269318	0.100749	0.0150057	0.00419997	0.00700495	0.012614	0.00756799	0.0136255	0.0223551	0.00737919	0.00625564
UID863	ABLIM1..3983./579	579	579-SSESIYSRPGSSIPGSPGHTIYAKVDNEILD	3983	ABLIM1	-0.0652077	-0.0549004	0.442564	0.463672	0.0880585	-0.295727	0.395268	0.345427	0.45671	0.254052	0.320989	0.0799804	-0.0309768	-0.460228	0.443494	-0.340284	1.05239	0.0596981	0.150863	-0.14002	0.342812	NA	0.558421	-0.382053	-0.226076	0.973162	0.360008	NA	26		ABLIM1..3983.	0.0111695	0.0273411	0.0269318	0.100749	0.0150057	0.00419997	0.00700495	0.012614	0.00756799	0.0136255	0.0223551	0.00737919	0.00625564
UID864	ABLIM1..3983./580	580	580-EPFYTSGYDDKQERQSLGESPRTLSPTPSAE	3983	ABLIM1	-0.62392	0.441805	-0.0523973	0.577655	0.0999413	-0.297881	0.634322	0.209512	0.635411	-0.739556	0.487067	-0.957803	1.13511	-0.623248	1.0304	-1.10904	0.417475	-0.246028	-0.0156274	-0.803944	0.361188	0.792075	0.333376	-0.846794	-0.407428	1.48929	0.611162	-0.204243	28		ABLIM1..3983.	0.0111695	0.0273411	0.0269318	0.100749	0.0150057	0.00419997	0.00700495	0.012614	0.00756799	0.0136255	0.0223551	0.00737919	0.00625564
UID865	ABLIM1..3983./581	581	581-TSGYDDKQERQSLGESPRTLSPTPSAEGYQD	3983	ABLIM1	-1.02312	-0.4908	0.238336	-0.0657578	-0.41997	-0.845428	NA	NA	-0.140468	-1.78987	-0.119249	-2.00052	NA	-0.0736599	0.635703	1.3455	-0.583144	-0.804024	-0.783909	-1.6564	-0.948131	0.854254	-0.163743	-1.6917	-1.57965	1.48317	-1.24149	-1.2777	25		ABLIM1..3983.	0.0111695	0.0273411	0.0269318	0.100749	0.0150057	0.00419997	0.00700495	0.012614	0.00756799	0.0136255	0.0223551	0.00737919	0.00625564
UID866	ABLIM1..3983./582	582	582-GPPSFAVVGPDMKRRSSGREEDDEELLRRRQ	3983	ABLIM1	0.143212	-0.126683	-0.075168	0.0736966	0.260468	0.140021	0.559971	0.34493	0.131778	0.0137038	-0.0234933	-0.31985	0.105632	-0.22368	0.615804	-0.719967	0.42854	-0.0954483	0.157198	-0.321958	1.16377	0.965541	-0.369824	-0.763831	-0.682118	1.70975	-0.0416087	-0.120038	28		ABLIM1..3983.	0.0111695	0.0273411	0.0269318	0.100749	0.0150057	0.00419997	0.00700495	0.012614	0.00756799	0.0136255	0.0223551	0.00737919	0.00625564
UID867	ABLIM1..3983./583	583	583-PPSFAVVGPDMKRRSSGREEDDEELLRRRQL	3983	ABLIM1	0.176851	-0.203786	0.336514	0.272175	0.103871	-0.325751	0.565305	0.000355721	0.434335	0.23925	-0.119349	-0.425315	0.256359	-0.189838	0.519181	-0.41169	1.13518	-0.0530162	-0.0384518	-0.281085	1.74128	0.668046	-0.27504	-0.363896	-0.497679	1.42688	0.112054	-0.289056	28		ABLIM1..3983.	0.0111695	0.0273411	0.0269318	0.100749	0.0150057	0.00419997	0.00700495	0.012614	0.00756799	0.0136255	0.0223551	0.00737919	0.00625564
UID868	ABLIM1..3983./584	584	584-PPIYKQHAALAAQSKSSEDIIKFSKFPAAQA	3983	ABLIM1	-0.818984	0.292638	1.74644	1.06674	0.0911306	0.53413	-0.0227718	1.31051	1.26024	0.131165	1.22234	-0.188641	0.587869	0.568179	1.32703	-1.49675	0.435809	-0.36767	0.757407	-1.78326	1.73086	1.72407	1.22897	-1.03146	0.14326	1.99548	1.78093	0.00820923	28		ABLIM1..3983.	0.0111695	0.0273411	0.0269318	0.100749	0.0150057	0.00419997	0.00700495	0.012614	0.00756799	0.0136255	0.0223551	0.00737919	0.00625564
UID871	ABLIM1..3983./585	585	585-EGYQDVRDRMIHRSTSQGSINSPVYSRHSYT	3983	ABLIM1	0.1083	-0.0660412	1.59712	0.621353	0.120085	0.114627	0.673813	0.151779	0.258651	0.297598	0.513927	-0.493771	0.597385	0.201008	0.801204	-0.784709	0.846944	-0.302742	-0.161731	-0.75528	1.53073	NA	0.574519	-0.670343	-0.0994625	1.23243	0.39147	NA	26		ABLIM1..3983.	0.0111695	0.0273411	0.0269318	0.100749	0.0150057	0.00419997	0.00700495	0.012614	0.00756799	0.0136255	0.0223551	0.00737919	0.00625564
UID875	ABLIM1..3983./587	587	587-SPINSASHIPSSKTASLPGYGRNGLHRPVST	3983	ABLIM1	-0.680101	-0.46887	1.81601	0.129191	0.222868	-0.622056	-0.172828	0.513406	0.211624	-0.316163	0.76877	-1.06673	-0.00338395	-0.319763	0.358791	-1.82454	0.0149217	-0.772574	-0.130566	-1.78118	0.786402	1.00644	-0.0619667	-1.75283	-0.871052	1.66862	0.266541	-0.70374	28		ABLIM1..3983.	0.0111695	0.0273411	0.0269318	0.100749	0.0150057	0.00419997	0.00700495	0.012614	0.00756799	0.0136255	0.0223551	0.00737919	0.00625564
UID876	ABLIM1..3983./588	588	588-DKQERQSLGESPRTLSPTPSAEGYQDVRDRM	3983	ABLIM1	-0.409129	-0.0874165	1.01992	0.0785851	0.106274	-0.353347	0.576146	0.213113	0.0802741	-0.486447	0.272714	-0.723877	0.290701	0.000599543	0.76606	-1.02123	0.136385	-0.223491	-0.193276	-0.71066	0.112111	0.914123	0.198082	-1.16613	-0.804139	1.75688	-0.496398	-0.255829	28		ABLIM1..3983.	0.0111695	0.0273411	0.0269318	0.100749	0.0150057	0.00419997	0.00700495	0.012614	0.00756799	0.0136255	0.0223551	0.00737919	0.00625564
UID878	ABLIM1..3983./589	589	589-KQSTKTEEKLRPTRTSSESIYSRPGSSIPGS	3983	ABLIM1	-0.352412	-0.365604	0.474579	0.554396	-0.0862956	-0.26096	NA	0.700873	0.567616	-0.3699	1.98017	NA	0.537577	-0.22078	1.56935	-2.26839	0.438354	-0.274271	0.494907	NA	0.0365057	0.620492	0.90494	-2.13872	NA	2.42404	-0.386426	-0.348804	24		ABLIM1..3983.	0.0111695	0.0273411	0.0269318	0.100749	0.0150057	0.00419997	0.00700495	0.012614	0.00756799	0.0136255	0.0223551	0.00737919	0.00625564
UID882	ABLIM1..3983./590	590	590-KESRERSSLLASRYDSPINSASHIPSSKTAS	3983	ABLIM1	-0.306514	-0.386357	NA	NA	NA	NA	-0.172787	NA	NA	NA	0.00741291	-0.378639	NA	NA	0.146993	-0.556746	0.359873	NA	0.0727539	-0.668351	NA	NA	0.990367	NA	0.0149431	0.460214	0.414504	NA	14		ABLIM1..3983.	0.0111695	0.0273411	0.0269318	0.100749	0.0150057	0.00419997	0.00700495	0.012614	0.00756799	0.0136255	0.0223551	0.00737919	0.00625564
UID885	DVL1..1855./591	591	591-SGVGSSWRERPAGQLSRGSSPRSQASATAPG	1855	DVL1	-1.29543	0.296371	-1.21089	-0.303116	1.08484	0.292073	0.167422	1.1745	0.0709028	-1.00774	-0.208719	0.309688	-0.962637	NA	-0.622528	-0.085495	-0.845199	0.032692	0.18169	-1.00261	NA	0.0384598	-1.20714	-0.618325	-0.828074	0.202573	-0.584813	-0.376584	26		DVL1..1855.	0.203052	0.496913	0.0642716	0.430401	0.183232	0.0847722	0.0741868	0.179492	0.208764	0.121365	0.132667	0.379724	0.101113
UID891	CHD1..1105./592	592	592-SDWQMDHRASSSGPRSPLDQRSYGSRSPFEH	1105	CHD1	-0.162398	-0.264655	-0.130439	-0.48446	-0.0613613	-0.0461256	-0.0551284	-0.460464	0.520078	-0.792724	-0.219647	-2.04987	-0.912896	0.269613	0.242981	-1.64565	-0.501119	-0.628701	-0.686653	-0.379373	-0.199244	0.0866868	-0.0273159	-0.560321	-0.130653	-0.534815	-0.141195	-1.1134	28		CHD1..1105.	0.0520439	0.0631515	0.59208	0.341122	0.646838	0.164296	0.0462571	0.189784	0.0948887	0.234945	0.0122269	0.202255	0.110715
UID897	CHD1..1105./594	594	594-LPRMRNCAKQISFNGSEGRRSRSRRYSGSDS	1105	CHD1	0.240326	-0.182344	0.741902	0.0656681	0.200676	0.068712	0.275438	-0.172589	0.379929	0.317108	0.118022	-0.672059	-0.373765	0.239983	0.511957	-0.38011	0.350178	0.0356226	-0.412162	0.120374	0.708726	0.315148	0.0938153	-0.254825	0.0538378	0.0416598	-0.000212431	-0.348003	28		CHD1..1105.	0.0520439	0.0631515	0.59208	0.341122	0.646838	0.164296	0.0462571	0.189784	0.0948887	0.234945	0.0122269	0.202255	0.110715
UID900	CHD1..1105./595	595	595-VQAKPPKVDGAEFWKSSPSILAVQRSAILKK	1105	CHD1	-0.623637	-0.0202594	-0.480776	-0.468024	-0.407408	-0.152392	-0.0436134	-0.138664	-0.0283964	-0.191768	-0.337145	-0.425251	-0.493145	0.0357412	-0.305485	-0.0966473	0.115712	-0.0196815	0.00916036	0.227756	-0.729005	-0.411867	-0.280778	-0.690277	-0.238721	-0.101535	-0.93154	-0.0899763	28		CHD1..1105.	0.0520439	0.0631515	0.59208	0.341122	0.646838	0.164296	0.0462571	0.189784	0.0948887	0.234945	0.0122269	0.202255	0.110715
UID902	CHD1..1105./597	597	597-SYGSRSPFEHSVEHKSTPEHTWSSRKT____	1105	CHD1	NA	-0.379345	-0.183902	NA	-0.245664	0.511344	0.461034	0.337085	0.900283	0.0818257	-0.350231	NA	-0.0612102	NA	-0.409142	-0.596339	0.239153	0.115039	-0.171866	NA	NA	NA	0.052242	NA	NA	-0.568534	NA	NA	17		CHD1..1105.	0.0520439	0.0631515	0.59208	0.341122	0.646838	0.164296	0.0462571	0.189784	0.0948887	0.234945	0.0122269	0.202255	0.110715
UID910	CHD2..1106./599	599	599-ENKVPRLKEEHGIELSSPRHSDNPSEEGEVK	1106	CHD2	NA	0.103127	0.26328	0.138884	0.549571	0.304328	-0.296177	0.030488	0.143707	0.569464	0.367006	0.25539	-0.0331893	NA	0.377894	0.219975	0.308409	0.237605	0.569961	-0.130561	NA	0.627199	0.524202	-0.150457	0.00190926	0.522847	NA	0.16176	24		CHD2..1106.	0.0390084	0.0230461	0.134479	0.0593961	0.173489	0.100861	0.0336308	0.083424	0.053617	0.00957703	0.466038	0.044244	0.00567407
UID911	CHD2..1106./600	600	600-NKVPRLKEEHGIELSSPRHSDNPSEEGEVKD	1106	CHD2	0.0396895	0.0483594	0.0868821	0.301248	0.208714	0.405412	0.0225091	0.441826	0.320032	0.583509	0.694833	0.669457	0.473084	-0.437045	0.571073	0.282577	0.282313	0.249217	0.805152	-0.256418	-1.32105	0.276761	0.837034	-0.990955	0.200542	0.539537	1.03596	0.310635	28		CHD2..1106.	0.0390084	0.0230461	0.134479	0.0593961	0.173489	0.100861	0.0336308	0.083424	0.053617	0.00957703	0.466038	0.044244	0.00567407
UID913	CHD2..1106./601	601	601-RDYYDRHHHDSKRRRSDEFRPQNYHQQDFRR	1106	CHD2	0.452515	0.0129997	0.432173	0.124243	0.260314	0.355686	0.223818	0.383144	0.467587	1.34768	0.902372	0.637636	0.441406	0.0875066	0.560262	-0.0254084	0.225217	0.350065	0.474371	0.161277	-0.271991	0.445744	0.159753	-0.401122	0.0215365	0.486643	0.739482	0.463181	28		CHD2..1106.	0.0390084	0.0230461	0.134479	0.0593961	0.173489	0.100861	0.0336308	0.083424	0.053617	0.00957703	0.466038	0.044244	0.00567407
UID921	STX16..8675./604	604	604-EQVSSHITSSPLHSRSIAAELDELADDRMAL	8675	STX16	-0.181416	-0.0572605	0.250256	-0.165907	-0.251626	-0.286094	-0.0942407	0.144633	-0.256474	0.414092	0.222739	-0.119725	-0.0646296	-0.0931168	0.11985	0.0398769	1.78015	-0.0125375	-0.111008	-0.452538	0.642245	-0.0135369	0.0172355	-0.0528402	0.397267	-0.0401497	0.0818293	NA	27		STX16..8675.	0.0137805	0.0159345	0.0148385	0.0100738	0.0172337	0.0167102	0.0217314	0.00706263	0.690289	0.0129296	0.0189683	0.033605	0.00447371
UID922	PRRG1..5638./605	605	605-LGYVVGRSDSVSTRLSNCDPPPTYEEATGQV	5638	PRRG1	-0.173482	-0.385138	0.135466	-0.0422194	0.263089	-0.24284	0.0848827	-0.504216	-0.141534	-0.0030849	-0.140036	0.44252	-0.291666	0.0555296	0.174366	0.160092	0.199517	-0.324583	0.208643	0.201475	0.205677	0.405148	0.337304	-0.17347	0.455467	0.0463929	0.273478	0.341106	28		PRRG1..5638.	0.00372797	0.0395752	0.0508695	0.024877	0.0118707	0.0111455	0.0859296	0.0311515	0.038263	0.0562532	0.00575937	0.0205847	0.0101275
UID931	TP53I11..9537./610	610	610-__MAAKQPPPLMKKHSQTDLVSRLKTRKILG	9537	TP53I11	-1.04875	0.637499	-1.58682	1.00878	-1.46638	-1.235	0.780614	1.31262	0.109562	-0.274061	-1.45506	-1.34999	1.67923	1.40702	1.12416	-1.56089	-0.261179	2.028	-1.10453	-0.82771	1.85414	-1.3838	0.226364	-0.175991	-1.94561	-0.498841	2.03056	1.33184	28		TP53I11..9537.	0.0643245	0.0218231	0.0237636	0.0112377	0.0276115	0.0111966	0.0302023	0.00687554	0.00967953	0.0556937	0.0255435	0.120669	0.0555554
UID932	KMT2D..8085./611	611	611-PHLGSGRWEQEDRALSPVIPLIPRASIPVFP	8085	KMT2D	0.731016	-0.075748	0.171099	-0.0662456	-0.666971	-0.170561	0.485204	0.0326277	0.541215	-2.47073	0.662117	0.299115	-0.411545	0.00113233	0.324449	0.043745	0.326177	0.276625	0.269138	-2.96505	0.0132039	0.336371	1.02948	-1.98787	0.873409	0.502486	0.8012	0.653648	28		KMT2D..8085.	0.869495	0.824447	0.456973	0.399763	0.492272	0.263635	0.160231	0.0445462	0.494674	0.333428	0.65427	0.733582	0.0739546
UID933	KMT2D..8085./612	612	612-ARPKPRARPPEEGEDSRPPRLKKWKGVRWKR	8085	KMT2D	0.783872	-0.122255	NA	0.427092	0.519114	0.600942	0.516612	NA	0.678762	NA	-0.172762	-0.373845	NA	NA	0.213068	0.00485086	1.75985	NA	0.0620394	-0.288616	NA	1.19924	1.07689	-0.525708	0.253889	0.135624	1.29866	1.21922	21		KMT2D..8085.	0.869495	0.824447	0.456973	0.399763	0.492272	0.263635	0.160231	0.0445462	0.494674	0.333428	0.65427	0.733582	0.0739546
UID934	KMT2D..8085./613	613	613-ESPGVGGGKASEPLLSPPPFGESRKALEVKK	8085	KMT2D	1.08251	-0.815643	0.273076	-0.31286	0.396397	-0.0972915	0.55616	0.24395	0.747575	-0.85014	0.628774	-0.0109269	-0.158476	-0.100137	0.37656	0.328676	0.549682	0.240995	0.185827	-0.636641	0.388309	0.405364	1.05128	-0.503056	0.504323	0.112263	0.437694	0.317236	28		KMT2D..8085.	0.869495	0.824447	0.456973	0.399763	0.492272	0.263635	0.160231	0.0445462	0.494674	0.333428	0.65427	0.733582	0.0739546
UID940	KMT2D..8085./616	616	616-AAGAVGPPGSWGAEPSSPAFEQLSRGQTPFA	8085	KMT2D	0.394	-0.122021	NA	-0.0825913	NA	-0.167664	0.0411634	0.0774031	-0.241969	-0.142358	0.0418863	-0.111122	-0.395739	0.0488043	0.149209	0.124891	-0.13121	-0.372622	0.0684786	-0.0206378	-0.163127	NA	-0.0157757	-0.130158	0.0714135	-0.0753822	0.0500193	-0.180628	25		KMT2D..8085.	0.869495	0.824447	0.456973	0.399763	0.492272	0.263635	0.160231	0.0445462	0.494674	0.333428	0.65427	0.733582	0.0739546
UID941	KMT2D..8085./617	617	617-AGAVGPPGSWGAEPSSPAFEQLSRGQTPFAG	8085	KMT2D	0.155477	-0.152824	NA	NA	NA	NA	0.136003	NA	NA	NA	-0.370545	0.0350208	NA	NA	0.0849981	0.174674	-0.475692	NA	0.211674	0.56098	NA	NA	-0.117249	NA	0.0583391	0.117171	-0.141325	NA	14		KMT2D..8085.	0.869495	0.824447	0.456973	0.399763	0.492272	0.263635	0.160231	0.0445462	0.494674	0.333428	0.65427	0.733582	0.0739546
UID942	KMT2D..8085./618	618	618-ELESGALTLPGGPAASGDELDKMESSLVASE	8085	KMT2D	NA	NA	-0.268846	-0.327011	-0.478412	-0.196572	-0.227411	0.160132	-0.0173621	-0.187016	0.189765	0.506972	-0.276212	-0.175407	-0.296281	0.0405378	-0.657859	-0.0312297	-0.298882	-0.25724	NA	0.14417	0.397786	-0.280336	0.340396	0.194748	NA	0.230969	24		KMT2D..8085.	0.869495	0.824447	0.456973	0.399763	0.492272	0.263635	0.160231	0.0445462	0.494674	0.333428	0.65427	0.733582	0.0739546
UID944	KMT2D..8085./620	620	620-IRSVAEQHTPVCSRFSPPEPGDTPTDEPDAL	8085	KMT2D	0.177759	0.0481784	-0.166835	-0.0941103	-0.38591	-0.248161	0.215427	-0.30431	0.133405	-1.22083	0.220258	0.233646	-0.516867	-0.153343	0.360865	0.164822	-0.216558	-0.104223	0.14214	-0.599003	-0.129939	0.253675	0.55154	-0.463612	0.297816	0.529672	0.48157	0.404072	28		KMT2D..8085.	0.869495	0.824447	0.456973	0.399763	0.492272	0.263635	0.160231	0.0445462	0.494674	0.333428	0.65427	0.733582	0.0739546
UID945	KMT2D..8085./621	621	621-TSQKGDDGPDIADEESRGLEGKADTPGPEDG	8085	KMT2D	0.318448	-0.458162	NA	-0.0629673	-0.267735	0.666091	0.574878	NA	0.13712	NA	-0.152462	-0.0128837	NA	NA	-0.131545	-0.0382471	0.357168	NA	-0.13028	-0.634989	NA	1.15453	0.469746	-0.287732	-0.0906744	0.289325	1.0769	0.723737	21		KMT2D..8085.	0.869495	0.824447	0.456973	0.399763	0.492272	0.263635	0.160231	0.0445462	0.494674	0.333428	0.65427	0.733582	0.0739546
UID946	KMT2D..8085./622	622	622-EAEGPGGKEKGLEGKSPDTGPDWLKQFDAVL	8085	KMT2D	0.829541	-0.182888	0.284329	0.0388115	-0.359864	0.300913	0.611598	0.182957	0.541892	-0.233664	0.701184	0.618859	0.440254	0.0217371	0.198969	0.4883	0.278498	0.348067	0.322326	-0.398533	0.509187	0.45808	0.784998	-0.0817324	0.462911	0.346383	0.551446	0.626274	28		KMT2D..8085.	0.869495	0.824447	0.456973	0.399763	0.492272	0.263635	0.160231	0.0445462	0.494674	0.333428	0.65427	0.733582	0.0739546
UID949	KMT2D..8085./623	623	623-EPGQTPGSLASELKGSPVLLDPEELAPVTPM	8085	KMT2D	0.40585	0.17007	-0.0747948	-0.0574387	-0.0137733	-0.210626	0.468332	0.0235564	0.303883	-0.835518	0.390289	0.566806	-0.561938	-0.0888907	0.227057	0.259629	0.229258	0.226525	0.0160478	-0.380573	0.220039	0.186053	0.62447	-0.496832	0.568862	0.348447	0.684596	0.440541	28		KMT2D..8085.	0.869495	0.824447	0.456973	0.399763	0.492272	0.263635	0.160231	0.0445462	0.494674	0.333428	0.65427	0.733582	0.0739546
UID950	KMT2D..8085./624	624	624-LPEVKPKVEEGGRHPSPCQFTIATPKVEPAP	8085	KMT2D	0.798217	0.177758	0.0745462	-0.227224	-0.281392	-0.136098	0.334652	0.214548	0.417161	-0.546044	0.281259	-0.199912	-0.258311	-0.0600243	0.16034	-0.107233	0.102185	0.0783998	-0.165672	-0.294244	0.308907	0.207544	0.801802	-0.682299	0.627886	-0.110619	1.09718	0.334622	28		KMT2D..8085.	0.869495	0.824447	0.456973	0.399763	0.492272	0.263635	0.160231	0.0445462	0.494674	0.333428	0.65427	0.733582	0.0739546
UID951	KMT2D..8085./625	625	625-GEFHTTPPGTPRHQPSTPDPFLKPRCPSLDN	8085	KMT2D	NA	NA	0.403596	-0.481489	NA	0.296165	0.849037	0.592545	0.650671	-1.28599	1.14922	NA	-0.215487	-0.0920134	NA	NA	0.659497	0.103798	0.20588	NA	NA	NA	0.964327	-0.959743	NA	NA	NA	0.397093	16		KMT2D..8085.	0.869495	0.824447	0.456973	0.399763	0.492272	0.263635	0.160231	0.0445462	0.494674	0.333428	0.65427	0.733582	0.0739546
UID952	KMT2D..8085./626	626	626-LSMKIPNSYEVLFPESPARAGTEPKKGEAEG	8085	KMT2D	0.305051	0.0124838	0.0311648	-0.0315459	-0.0315297	0.00122237	0.252902	0.0300922	-0.213285	-0.280249	-0.0865076	-0.187025	-0.0407739	-0.0114822	-0.368214	-0.0898609	-0.240435	-0.401134	-0.0895252	-0.265974	0.245297	-0.0262302	0.0172795	0.124584	0.0698942	0.283401	0.0809725	0.171727	28		KMT2D..8085.	0.869495	0.824447	0.456973	0.399763	0.492272	0.263635	0.160231	0.0445462	0.494674	0.333428	0.65427	0.733582	0.0739546
UID958	KMT2D..8085./628	628	628-GVEHMECEIKLEGPVSPDVEPGKEETEESKK	8085	KMT2D	0.35144	-0.3348	0.0401484	-0.24003	0.0121053	-0.244801	0.370456	0.100094	0.40499	-1.51218	0.364679	0.227223	-0.454775	0.00230026	0.201193	-0.121389	0.0557097	-0.109938	0.0998507	-1.14278	0.260546	0.369701	0.767217	-1.16048	0.634677	0.542488	0.911506	0.287612	28		KMT2D..8085.	0.869495	0.824447	0.456973	0.399763	0.492272	0.263635	0.160231	0.0445462	0.494674	0.333428	0.65427	0.733582	0.0739546
UID962	KMT2D..8085./630	630	630-PEESPMSPPPEVSRLSPLPVVSRLSPPPEES	8085	KMT2D	0.796702	0.238712	0.243765	0.163803	0.127274	0.0832887	0.661352	0.515475	0.24386	-1.04479	0.384448	1.03415	-0.0740754	0.136726	0.017909	0.600717	0.0787447	0.586492	0.377317	-0.214053	0.65128	0.500692	0.784572	-0.207816	0.784025	0.24907	0.71932	0.720748	28		KMT2D..8085.	0.869495	0.824447	0.456973	0.399763	0.492272	0.263635	0.160231	0.0445462	0.494674	0.333428	0.65427	0.733582	0.0739546
UID963	KMT2D..8085./631	631	631-WLTETGMALLRNLTMSPLHKRRQRRGRLGLP	8085	KMT2D	0.680046	0.177709	-0.111161	0.134357	-0.236105	0.155982	-0.0192181	-0.128532	0.0874445	-1.58933	0.368099	0.318808	-0.662262	-0.063755	-0.100777	0.425542	0.162479	-0.075767	0.0549103	-0.844579	0.0155592	0.229674	0.188204	-1.13407	0.263979	-0.150846	0.17429	0.719467	28		KMT2D..8085.	0.869495	0.824447	0.456973	0.399763	0.492272	0.263635	0.160231	0.0445462	0.494674	0.333428	0.65427	0.733582	0.0739546
UID964	KMT2D..8085./632	632	632-PKPQGPTLEPPPGRVSPAAAQLADTLFSKGL	8085	KMT2D	0.884888	-0.141365	-0.0912673	-0.0660955	-0.549541	-0.0716929	0.541962	0.313569	0.447789	-1.3826	0.464794	0.640447	-0.303006	0.0113633	0.213967	0.406764	0.23985	0.398745	0.328023	-1.15769	0.0373999	0.409096	0.757533	-1.16143	0.696248	0.394793	0.543684	0.792782	28		KMT2D..8085.	0.869495	0.824447	0.456973	0.399763	0.492272	0.263635	0.160231	0.0445462	0.494674	0.333428	0.65427	0.733582	0.0739546
UID968	KMT2D..8085./636	636	636-LPYLSHGASQRSGITSPVEKREDPGTGMGSS	8085	KMT2D	1.70908	-0.2722	0.204877	-0.0846925	-0.104275	-0.120244	0.627304	0.0797338	0.382932	-1.54909	0.457606	0.210345	-0.287637	0.197184	0.461062	0.481839	-0.0917252	0.245709	0.419899	-2.14953	0.604149	NA	0.697821	-1.54762	0.925644	0.572642	0.253866	NA	26		KMT2D..8085.	0.869495	0.824447	0.456973	0.399763	0.492272	0.263635	0.160231	0.0445462	0.494674	0.333428	0.65427	0.733582	0.0739546
UID970	KMT2D..8085./637	637	637-PPRSLPSDPFSRVPASPQSQSSSQSPLTPRP	8085	KMT2D	-0.0132833	0.0511148	0.299147	0.10419	0.032649	0.14021	0.368171	0.244773	0.179631	-0.0694566	-0.114547	-0.330423	0.186389	0.0152373	0.117861	-0.387458	-0.0773935	0.0121951	-0.353204	-0.324929	0.322245	0.145493	0.391666	0.0410557	0.0313139	-0.0811229	0.18388	-0.0792557	28		KMT2D..8085.	0.869495	0.824447	0.456973	0.399763	0.492272	0.263635	0.160231	0.0445462	0.494674	0.333428	0.65427	0.733582	0.0739546
UID974	ITGB1BP1..9270./638	638	638-VDSSLGGLSRSSTVASLDTDSTKSSGQSNNN	9270	ITGB1BP1	-0.286846	NA	NA	-0.11146	NA	0.166145	0.100616	-0.0144587	0.0554891	-0.33415	NA	-0.0852985	-0.157033	-0.103149	NA	NA	NA	0.36659	NA	-0.00592804	0.155214	NA	NA	-0.395381	-0.499133	NA	0.184693	0.239412	17		ITGB1BP1..9270.	0.0817189	0.023299	0.00786679	0.054246	0.0158491	0.0234569	0.0351317	0.0239087	0.0754633	0.00979251	0.0262483	0.0230886	0.0144228
UID979	MAP2K7..5609./643	643	643-ENREARRRIDLNLDISPQRPRPTLQLPLAND	5609	MAP2K7	0.419975	-0.659952	-0.12888	0.644332	0.133434	-0.584706	0.277554	0.0792732	-0.166747	-1.06222	0.22963	0.744664	-0.231306	-0.20875	-0.642441	0.0851841	-0.467147	-0.295042	-0.106565	0.492946	0.390194	NA	0.359698	-0.58831	0.25074	-0.0239697	0.22819	-0.205746	27		MAP2K7..5609.	0.0116034	0.0357101	0.0268926	0.0425916	0.0870234	0.0912215	0.0108731	0.00828203	0.00117877	0.0135366	0.0071162	0.134548	0.016455
UID983	PDCD5..9141./645	645	645-EKTTTVKFNRRKVMDSDEDDDY_________	9141	PDCD5	-0.0803278	-0.636388	-0.574682	0.039913	-0.331279	-0.00946124	-0.214969	-0.340408	-0.225522	-1.03056	-0.0838749	0.0134459	-0.446847	-0.101834	-0.451549	-0.61716	-0.530215	-0.424498	-0.894912	-0.35748	0.0299829	-0.498825	-0.539501	-0.192334	0.0334651	-0.0593967	-0.302231	-0.394298	28		PDCD5..9141.	0.562374	0.497335	0.0668378	0.940535	0.719854	0.366335	0.221564	0.28119	0.403727	0.835956	0.282898	0.642909	0.66684
UID984	PDCD5..9141./646	646	646-AAQQEAKHREAEMRNSILAQVLDQSARARLS	9141	PDCD5	0.206808	-0.316715	0.352121	0.241304	0.083374	NA	0.360216	0.136784	NA	0.410127	-0.0376225	0.335595	0.108474	0.0639467	0.402027	1.02431	0.632741	0.354467	0.0184984	-0.0208111	0.239464	NA	0.0524688	0.100728	0.119388	0.0567341	0.363315	NA	24		PDCD5..9141.	0.562374	0.497335	0.0668378	0.940535	0.719854	0.366335	0.221564	0.28119	0.403727	0.835956	0.282898	0.642909	0.66684
UID985	PRMT5..10419./647	647	647-NAYELFAKGYEDYLQSPLQPLMDNLESQTYE	10419	PRMT5	-0.863344	-0.793988	-0.48895	-0.414388	-0.339895	-0.0698659	0.296648	-0.226785	-0.0951498	0.770439	0.184901	0.0808187	-0.0535196	-0.730975	0.68186	-0.202878	0.466455	-0.222759	0.378033	-0.0558064	-0.318202	-0.530733	0.161074	-0.0684237	0.0102744	-0.0516005	-0.353246	0.329978	28		PRMT5..10419.	0.960346	0.926898	0.944813	0.962998	0.951793	0.979476	0.962758	0.98433	0.993689	0.97704	0.978405	0.869998	0.960461
UID986	SLC9A3R1..9368./648	648	648-QKENSREALAEAALESPRPALVRSASSDTSE	9368	SLC9A3R1	1.5882	-0.197385	0.237296	0.0221429	-0.00117111	-0.589405	-0.0738586	0.76547	-0.121007	-0.598338	-0.229698	-0.903108	-0.00430648	0.125704	-0.19037	-0.911154	0.424101	-0.805538	0.275519	-0.369538	-0.42974	0.481369	0.943328	-0.403142	-0.331032	0.587419	-0.251498	-0.06309	28		SLC9A3R1..9368.	0.307938	0.114375	0.0113659	0.0275761	0.0168273	0.0254411	0.0163303	0.020671	0.0173726	0.101134	0.0209191	0.0470925	0.0274639
UID987	SLC9A3R1..9368./649	649	649-PLPVPFTNGEIQKENSREALAEAALESPRPA	9368	SLC9A3R1	-0.0727099	-0.608952	-0.252492	-0.210666	0.407576	-0.503714	-0.498659	-0.166537	-0.571536	-0.394911	-0.481839	-0.941146	-0.0941331	-0.476952	-0.304667	-0.730488	0.106747	-0.708665	-0.770012	-0.855056	0.228519	-0.271245	-0.481422	0.229658	-0.135108	-0.216077	-0.435087	-0.840644	28		SLC9A3R1..9368.	0.307938	0.114375	0.0113659	0.0275761	0.0168273	0.0254411	0.0163303	0.020671	0.0173726	0.101134	0.0209191	0.0470925	0.0274639
UID990	SLC9A3R1..9368./652	652	652-EAALESPRPALVRSASSDTSEELNSQDSPPK	9368	SLC9A3R1	1.38228	-0.108994	0.279626	0.304117	0.132389	-0.17031	0.00190512	0.741828	0.132359	-0.23349	-0.122738	-0.599518	0.058252	0.241431	0.296074	-0.547234	0.304495	-0.372343	0.30604	-0.384264	0.126148	0.861281	0.551966	-0.382482	-0.0752328	0.514651	0.481367	0.00361252	28		SLC9A3R1..9368.	0.307938	0.114375	0.0113659	0.0275761	0.0168273	0.0254411	0.0163303	0.020671	0.0173726	0.101134	0.0209191	0.0470925	0.0274639
UID991	SLC9A3R1..9368./653	653	653-AALESPRPALVRSASSDTSEELNSQDSPPKQ	9368	SLC9A3R1	1.45601	-0.405517	-0.265263	0.396431	0.0379324	-0.337132	0.236846	0.611252	0.160518	-0.574875	-5.96046e-05	-0.533453	0.307089	-0.150777	0.397257	-1.32308	0.6466	-0.760106	0.647554	-0.330721	-0.209327	0.909166	0.773077	-0.457538	-0.0238088	0.812611	0.363407	-0.0547349	28		SLC9A3R1..9368.	0.307938	0.114375	0.0113659	0.0275761	0.0168273	0.0254411	0.0163303	0.020671	0.0173726	0.101134	0.0209191	0.0470925	0.0274639
UID995	CHEK1..1111./655	655	655-GGVSESPSGFSKHIQSNLDFSPVNSASSEEN	1111	CHEK1	-0.123329	0.143679	0.437278	0.161151	-0.357325	0.0407047	-0.642023	0.416997	-0.533526	-0.395955	NA	-0.738712	-0.883482	-0.0549679	-0.514135	0.249763	NA	NA	NA	-0.110643	-0.478297	-0.274515	NA	-0.460387	0.50455	0.158082	-0.661058	-0.245001	23		CHEK1..1111.	1	0.998496	1	0.997562	1	0.957359	0.962984	1	1	0.989527	1	1	0.999435
UID997	CHEK1..1111./657	657	657-SSQPEPRTGLSLWDTSPSYIDKLVQGISFSQ	1111	CHEK1	0.407881	-0.580876	-0.539866	-0.150927	-0.215144	-0.165349	-0.674834	-0.0482702	-0.186201	-0.625336	-0.219517	-0.480312	-0.811071	0.0181662	-0.416782	-0.121503	-0.643029	-0.0310524	0.0770149	-0.155148	-0.879804	-0.781989	-0.364634	-0.196988	0.137378	-0.207571	-0.743085	-0.0600602	28		CHEK1..1111.	1	0.998496	1	0.997562	1	0.957359	0.962984	1	1	0.989527	1	1	0.999435
UID998	CHEK1..1111./658	658	658-QPEPRTGLSLWDTSPSYIDKLVQGISFSQPT	1111	CHEK1	0.359534	0.421162	NA	0.503502	0.14506	-0.0162253	0.161515	0.089242	-0.0789745	0.00140858	0.417501	-0.298181	-0.0449371	0.0921717	-0.193878	0.425458	-0.097518	0.137666	0.435951	0.101312	NA	-0.143147	0.138787	-0.0453968	0.499927	0.70722	0.165488	-0.0923802	26		CHEK1..1111.	1	0.998496	1	0.997562	1	0.957359	0.962984	1	1	0.989527	1	1	0.999435
UID999	CHEK1..1111./659	659	659-YNKPLKKGAKRPRVTSGGVSESPSGFSKHIQ	1111	CHEK1	1.9641	-0.413045	-0.144561	-0.179894	0.156678	-0.522404	-0.89113	0.101671	-0.17896	-0.40673	-0.562466	-0.977734	-0.691709	-0.351779	-0.739471	0.865842	-0.528825	-0.110085	-0.304469	0.540584	-0.380163	-0.224585	-0.379798	-0.135845	-0.334349	-0.238434	-1.1222	-0.231292	28		CHEK1..1111.	1	0.998496	1	0.997562	1	0.957359	0.962984	1	1	0.989527	1	1	0.999435
UID1000	CHEK1..1111./660	660	660-KGAKRPRVTSGGVSESPSGFSKHIQSNLDFS	1111	CHEK1	0.39612	-0.0855105	-0.725048	0.0458863	-0.232384	0.187916	-0.793078	-0.163168	-0.00805902	-0.501531	-0.618511	-0.378149	-0.649051	0.0173564	-1.15964	-0.0473118	-0.548188	-0.124492	-0.197599	-0.367801	-0.624355	NA	-0.685265	-0.460745	-0.0715666	-0.256588	-1.28239	0.059659	27		CHEK1..1111.	1	0.998496	1	0.997562	1	0.957359	0.962984	1	1	0.989527	1	1	0.999435
UID1003	NDC80..10403./662	662	662-FGKLSINKPTSERKVSLFGKRTSGHGSRNSQ	10403	NDC80	0.195857	-0.640158	NA	-1.77565	NA	NA	-0.951067	0.0381269	NA	NA	-0.681517	1.78068	-1.54273	-0.94104	-0.436588	0.869737	1.03827	NA	0.356349	0.0119565	0.568459	NA	-0.611791	-1.12535	-0.716945	-0.0305872	-1.03774	NA	20		NDC80..10403.	1	1	1	0.999997	1	1	0.997311	1	1	0.999935	1	0.999964	0.999969
UID1004	NDC80..10403./663	663	663-VSLFGKRTSGHGSRNSQLGIFSSSEKIKDPR	10403	NDC80	0.235002	0.180856	-0.244966	-0.499472	-0.0232334	-0.319004	-0.425895	-0.301287	-0.187519	-0.1346	-0.255477	1.78546	-0.407055	-0.211228	-0.162742	1.38879	0.148046	0.00699854	0.843565	0.256795	0.706986	0.0969076	-0.0913323	-0.186675	-0.0439878	0.132321	-0.107881	-0.0115197	28		NDC80..10403.	1	1	1	0.999997	1	1	0.997311	1	1	0.999935	1	0.999964	0.999969
UID1005	NRP1..8829./664	664	664-LYCACWHNGMSERNLSALENYNFELVDGVKL	8829	NRP1	0.915798	-1.24796	0.237376	-1.04784	-0.383739	-0.575628	-0.317403	0.471829	0.732495	-0.550026	1.59826	0.148759	-0.170001	-0.228095	-0.0365613	3.44724	2.91267	-0.327405	1.36555	0.482576	-0.914096	0.680427	-0.323284	-0.766747	0.280629	1.20989	-0.199784	-0.0823615	28		NRP1..8829.	0.0558	0.0866	0.00818	0.0816	0.0163	0.14	0.0448	0.00766	0.0172	0.00807	0.000855	0.0165	0.0271
UID1006	UNC13B..10497./665	665	665-SMQSYDLDYPERRAISPTSSSRYGSSCNVSQ	10497	UNC13B	-0.182082	-0.320404	0.253899	NA	0.127277	0.000995159	1.40536	0.187564	-0.167165	0.248528	0.268621	-0.95972	1.20163	0.260292	2.38046	-0.183744	1.43198	-0.123693	-0.385947	-0.105591	0.402176	0.129673	0.299445	NA	-0.537276	-0.155753	0.428959	NA	25		UNC13B..10497.	0.292498	0.221086	0.0238447	0.0469406	0.14703	0.027798	0.0581397	0.0566395	0.106029	0.123446	0.133021	0.235529	0.0805204
UID1008	UNC13B..10497./667	667	667-EESQRKPLPTAAAQCSFEDPDSAVDDRDSDY	10497	UNC13B	0.79889	-0.107735	0.940774	0.338634	0.769838	0.40154	0.160432	1.0357	-0.0729425	-0.432122	1.52661	0.166495	1.9301	0.324212	3.16764	-0.335272	0.289936	0.0998452	0.156247	0.0919143	0.648755	0.961818	0.735004	0.0646702	0.823685	0.00258032	1.12756	-0.423516	28		UNC13B..10497.	0.292498	0.221086	0.0238447	0.0469406	0.14703	0.027798	0.0581397	0.0566395	0.106029	0.123446	0.133021	0.235529	0.0805204
UID1009	UNC13B..10497./668	668	668-SQPNASVHQFPVPVRSPQQLLLQGSSRDSCN	10497	UNC13B	0.0804894	-0.245851	-0.21506	0.0931881	-0.0640821	0.0776219	0.550039	-0.0108461	-0.221781	-0.0704491	-0.0209079	0.344811	0.265671	0.189542	0.249929	0.226734	0.281201	0.101683	0.149147	0.174532	0.346093	-0.0986404	-0.12136	0.118135	-0.124039	-0.122344	0.0940328	-0.252234	28		UNC13B..10497.	0.292498	0.221086	0.0238447	0.0469406	0.14703	0.027798	0.0581397	0.0566395	0.106029	0.123446	0.133021	0.235529	0.0805204
UID1010	UNC13B..10497./669	669	669-FPVPVRSPQQLLLQGSSRDSCNDSMQSYDLD	10497	UNC13B	0.0953908	-0.0238886	-0.176381	-0.162684	-0.035553	-0.0869529	-0.078053	-0.138873	-0.257597	-0.262686	-0.0514576	-0.0426416	0.0819076	-0.102534	0.84757	0.1583	-0.0245616	-0.0584518	-0.14519	0.0886583	0.0974045	NA	-0.267227	-0.132014	0.0751705	-0.0659876	-0.177404	-0.031394	27		UNC13B..10497.	0.292498	0.221086	0.0238447	0.0469406	0.14703	0.027798	0.0581397	0.0566395	0.106029	0.123446	0.133021	0.235529	0.0805204
UID1011	PSMA7..5688./670	670	670-_____MSYDRAITVFSPDGHLFQVEYAQEAV	5688	PSMA7	0.884598	-0.162836	-0.332843	-0.326487	-0.591561	-0.31939	-0.117621	0.451414	-0.174166	-0.477044	-0.332465	0.434142	-0.558421	-0.30292	-0.724699	0.370237	0.439461	0.702188	0.716774	-0.0467916	-0.102634	-0.351269	-0.135216	-0.61035	-0.0773163	0.0893807	-0.616173	-0.0454359	28		PSMA7..5688.	0.999996	1	1	0.999515	1	1	1	1	1	0.999976	1	1	1
UID1012	RASGRF2..5924./671	671	671-ESSPAADTTELSPCRSPSTPRHLRYRQPGGQ	5924	RASGRF2	0.166656	0.043762	-0.646563	0.0231226	-0.674005	-1.02183	-0.250273	0.33899	1.13572	0.158375	-0.715081	-1.23201	-1.01346	-0.52516	1.21812	-1.26928	-0.635586	-0.895733	-0.623033	-0.883083	-0.197055	0.30834	0.326379	-0.649256	0.0839955	-0.243336	0.752533	-0.671	28		RASGRF2..5924.	0.0237964	0.274461	0.00934399	0.134876	0.0486743	0.0283135	0.039498	0.0385429	0.0728146	0.107997	0.0123425	0.0358458	0.0189058
UID1013	RASGRF2..5924./672	672	672-SPAADTTELSPCRSPSTPRHLRYRQPGGQTA	5924	RASGRF2	0.225199	-0.408935	NA	NA	NA	NA	-0.338638	NA	NA	NA	-1.14844	-1.54139	NA	NA	1.14913	-1.29755	-1.16433	NA	-0.746869	-1.11147	NA	NA	0.205318	NA	-0.0284185	-0.653411	1.1782	NA	14		RASGRF2..5924.	0.0237964	0.274461	0.00934399	0.134876	0.0486743	0.0283135	0.039498	0.0385429	0.0728146	0.107997	0.0123425	0.0358458	0.0189058
UID1016	RASGRF2..5924./673	673	673-LAVSRTSSPVRARKLSLTSPLNSKIGALDLT	5924	RASGRF2	2.05707	-1.53274	-1.38919	-1.17132	-1.60476	-1.32421	-1.07744	0.642543	1.72238	2.12754	-1.85214	-1.15163	-1.78021	-1.60178	0.931662	-1.75531	-1.61904	-1.73115	-1.09359	-1.59248	1.60532	1.17145	-1.80391	-1.68678	-0.927718	-1.08293	1.17247	-0.540423	28		RASGRF2..5924.	0.0237964	0.274461	0.00934399	0.134876	0.0486743	0.0283135	0.039498	0.0385429	0.0728146	0.107997	0.0123425	0.0358458	0.0189058
UID1017	SCAMP3..10067./674	674	674-LDNPFQDPAVIQHRPSRQYATLDVYNPFETR	10067	SCAMP3	-0.290006	-0.8017	0.665058	0.0264719	0.0290527	0.0234489	0.0199378	-0.471541	0.22724	0.41916	-0.267921	0.325132	0.102387	0.00541687	-0.225241	0.0985556	3.9346	0.679873	-0.10955	0.297727	3.04772	-0.00884024	0.153009	0.338269	0.260323	0.617641	0.302681	0.0782967	28		SCAMP3..10067.	0.039263	0.0224769	0.013015	0.0114521	0.0500559	0.0998724	0.0559194	0.00833894	0.0382467	0.00364665	0.0724056	0.159915	0.00392832
UID1018	SCAMP3..10067./675	675	675-LPPPSAPSLQPSRKLSPTEPKNYGSYSTQAS	10067	SCAMP3	-0.225712	-0.957908	1.54525	-0.354144	0.61714	-0.539635	-0.0107272	-0.185953	0.196846	0.602869	0.144467	1.41281	-0.140234	0.19381	0.314649	1.42771	0.390786	1.16351	0.409307	0.473367	0.492556	0.402392	0.415069	0.326009	-0.255708	1.16309	-0.025908	0.160551	28		SCAMP3..10067.	0.039263	0.0224769	0.013015	0.0114521	0.0500559	0.0998724	0.0559194	0.00833894	0.0382467	0.00364665	0.0724056	0.159915	0.00392832
UID1020	BACH1..571./677	677	677-TPQCKLRRYQGNAKASPPLQDSASQTYESMC	571	BACH1	0.640348	-0.0582757	0.22434	-0.260274	0.0338945	0.1328	0.150874	-0.152163	-0.0767477	0.0177922	-0.101381	-0.207496	0.857899	-0.0255973	0.113615	-0.0442092	-0.166495	0.155304	-0.266066	0.308563	0.504755	0.0390708	0.192823	0.0529346	-0.0561689	0.757699	0.119416	0.0767237	28		BACH1..571.	0.0246596	0.05204	0.00881855	0.00720654	0.043619	0.0272029	0.00498711	0.014841	0.0321359	0.0578143	0.00517122	0.0406258	0.0296742
UID1022	BACH1..571./678	678	678-LGTREDSSVASSDRSSVEREVAEHLAKGFWS	571	BACH1	NA	-0.866549	0.428953	-1.01405	-0.519485	-0.488235	NA	0.131404	0.0663381	-0.384809	-0.169854	NA	0.812716	-0.419899	0.706237	0.0568314	-0.521292	0.218727	-0.0924444	NA	NA	NA	0.345453	-0.325331	NA	0.969353	NA	0.0372887	20		BACH1..571.	0.0246596	0.05204	0.00881855	0.00720654	0.043619	0.0272029	0.00498711	0.014841	0.0321359	0.0578143	0.00517122	0.0406258	0.0296742
UID1024	BACH1..571./680	680	680-SDRPPAVLPPCARGNSEPGYARGQESQQMST	571	BACH1	2.23716	NA	0.980743	-0.579402	-1.42067	-0.82397	1.63586	0.454747	-0.190038	-0.116638	-0.0834022	1.49252	0.633282	1.27743	0.0630121	-0.166796	0.970659	1.81604	0.182199	-0.222766	3.11929	1.30603	0.998166	-0.211123	-0.152235	1.21133	1.53923	1.34111	27		BACH1..571.	0.0246596	0.05204	0.00881855	0.00720654	0.043619	0.0272029	0.00498711	0.014841	0.0321359	0.0578143	0.00517122	0.0406258	0.0296742
UID1025	BACH1..571./681	681	681-QKRSECPWLGIRISESPEPGQRTFTTLSSVN	571	BACH1	0.853418	-0.03301	0.166432	-0.266245	-0.279715	-0.231128	0.354208	-0.0104507	-0.17854	-0.390695	-0.16697	-0.143127	1.13268	-0.306162	0.402331	-0.0202459	0.00406694	0.383196	-0.328865	0.179874	0.72078	0.116992	0.408418	-0.142784	-0.0575616	0.617741	0.298429	0.320106	28		BACH1..571.	0.0246596	0.05204	0.00881855	0.00720654	0.043619	0.0272029	0.00498711	0.014841	0.0321359	0.0578143	0.00517122	0.0406258	0.0296742
UID1026	BCKDK..10295./682	682	682-PLRPLLGPALALRARSTSATDTHHVEMARER	10295	BCKDK	-0.265799	0.510389	0.0369511	-0.205128	0.364289	-0.179163	0.069458	-0.239894	-0.268526	-0.564782	-0.437729	0.622724	0.79188	-0.150994	-0.375735	-0.117808	0.230069	0.180025	-0.192128	0.25651	0.0294123	-0.479778	0.0272654	0.244306	-0.473198	-0.552966	0.0702259	-0.499063	28		BCKDK..10295.	0.00869492	0.0134336	0.023427	0.0168079	0.0510219	0.210118	0.00407057	0.0418536	0.0543631	0.0336038	0.0044955	0.0597556	0.0326665
UID1030	IFIT3..3437./683	683	683-LEDGSEEMGQGAVSSSPRELLSNSEQLN___	3437	IFIT3	-0.230718	-0.234468	-0.502508	-0.404254	-0.374279	-0.481116	-0.1757	0.0149202	-0.199136	-0.394133	-0.250773	1.49306	-0.3346	-0.337514	-0.210438	-0.143154	-0.457975	0.907764	-0.360063	-0.00667429	-0.499763	0.0616668	-0.257376	-0.310084	-0.263982	0.65003	-0.349326	0.704908	28		IFIT3..3437.	0.0191322	0.0152844	0.00253817	0.0116825	0.0153235	0.00795001	0.0260261	0.014967	0.00370846	0.0168955	0.015967	0.0201594	0.0155844
UID1031	IFIT3..3437./684	684	684-EKQFSTDVLKQAIELSPDNQYVKVLLGLKLQ	3437	IFIT3	0.745983	-0.39514	NA	0.0872974	-0.0106936	-0.184555	-0.448016	NA	0.0396547	NA	-0.349467	2.16606	NA	NA	-0.223788	0.345237	-0.170708	NA	0.0823584	-0.224224	NA	0.188543	-0.55029	-0.10449	-0.072648	1.34691	-0.449224	0.763769	21		IFIT3..3437.	0.0191322	0.0152844	0.00253817	0.0116825	0.0153235	0.00795001	0.0260261	0.014967	0.00370846	0.0168955	0.015967	0.0201594	0.0155844
UID1032	GEMIN2..8487./685	685	685-EKLCADGAVGPATNESPGIDYVQIGFPPLLS	8487	GEMIN2	-0.139834	-0.373255	-0.477958	NA	-0.611976	NA	-0.127504	NA	NA	-0.538734	-0.22245	-0.269185	NA	NA	-0.494856	-0.641772	0.275922	-0.0922604	-0.184515	0.173476	NA	NA	-0.505906	NA	0.260694	0.182924	-0.490549	NA	18		GEMIN2..8487.	0.223722	0.494999	0.616081	0.788203	0.266088	0.477906	0.148452	0.36567	0.605948	0.291415	0.0506612	0.128086	0.244462
UID1036	IRF6..3664./687	687	687-DFTRSFDSGSVRLQISTPDIKDNIVAQLKQL	3664	IRF6	2.84869	0.399669	0.391614	-1.08692	-0.473611	1.08507	0.622815	-0.759445	0.68748	0.815869	0.137901	0.366921	0.534583	0.486718	0.812771	-0.802195	0.179792	1.2792	1.04685	-0.919498	1.06282	0.93245	0.127031	0.641571	-0.985037	0.779586	0.266103	0.582824	28		IRF6..3664.	0.0189	0.0292	0.274	0.0718	0.161	0.0507	0.000257	0.0151	0.0173	0.129	0.0189	0.346	0.0195
UID1039	KLF11..8462./689	689	689-PQSPDLVEPSTRTPVSPQVTDSKACTATDVL	8462	KLF11	0.230454	1.24931	-0.247636	NA	0.14039	NA	0.256317	NA	NA	0.109	0.054029	-0.212448	NA	NA	0.023572	0.0296512	-0.170723	0.309872	0.246367	-0.0300899	NA	NA	0.313269	NA	0.0557775	1.64007	-0.325785	NA	18		KLF11..8462.	0.036702	0.00882365	0.0612439	0.0565194	0.0418689	0.0196343	0.010503	0.0234631	0.0516292	0.0433155	0.0109715	0.0420542	0.0158776
UID1042	TAX1BP3..30851./690	690	690-FSEDKTDKGIYVTRVSEGGPAEIAGLQIGDK	30851	TAX1BP3	0.141203	-0.786655	-0.496586	-0.278378	-0.338131	0.0253935	0.47432	-0.06989	0.677922	0.15013	-0.2606	1.01421	-0.286472	-0.0197759	0.568758	2.00591	-0.510404	0.606845	0.486921	0.674569	0.370366	0.70707	-0.398857	-0.164873	0.710833	0.469365	0.102728	0.573111	28		TAX1BP3..30851.	0.252929	0.0394453	0.376259	0.116542	0.0824154	0.464772	0.0377937	0.0777438	0.454052	0.163817	0.846096	0.507577	0.599162
UID1045	GIPC1..10755./692	692	692-AFDMISQRSAGGRPGSGPQLGTGRGTLRLRS	10755	GIPC1	0.865565	-0.617042	-0.521708	-1.46197	-0.0174904	-0.106713	0.580466	0.251616	0.0635492	-0.200064	-0.818738	1.70961	-1.41289	-0.466998	0.818744	2.04211	-1.30616	1.83434	0.778907	0.150445	0.1519	0.910003	-0.720875	-0.189349	-0.501479	0.241306	-0.461702	0.602079	28		GIPC1..10755.	0.00852822	0.0129732	0.0452178	0.101938	0.0463444	0.0283511	0.29872	0.0293955	0.00177719	0.0174071	0.00906037	0.0283187	0.0334142
UID1047	IKBKB..3551./694	694	694-LLKIACSKVRGPVSGSPDSMNASRLSQPGQL	3551	IKBKB	0.00824547	0.367995	-0.182076	0.196229	0.119557	0.402717	0.105897	-0.594218	-0.347668	-0.3441	0.138825	-0.662511	0.0679266	0.115882	0.102109	0.463854	0.249899	0.132445	0.050842	0.270526	1.0864	0.311463	-0.0166939	0.370196	0.361648	-0.0848926	0.333359	-0.382035	28		IKBKB..3551.	0.0224169	0.0215256	0.0239834	0.110655	0.0531019	0.017255	0.0235469	0.063016	0.0100059	0.0463951	0.0127009	0.0506391	0.0455816
UID1050	RGS12..6002./696	696	696-EVEGRALPDSQQVPSSPASKHSLGSDHSSVS	6002	RGS12	-0.503312	-0.259365	0.163433	-0.254096	0.421133	-0.0220032	-0.24228	-0.369868	-0.138654	-0.174676	-0.296568	-0.0434394	0.253429	-0.0656548	0.221646	1.19053	-0.799725	-0.448872	-0.2599	0.0510552	NA	-0.177097	-0.0990508	0.697315	0.187581	0.567134	0.11765	-0.119829	27		RGS12..6002.	0.0130439	0.356487	0.00888346	0.00699872	0.00917036	0.00761862	0.0224246	0.00979989	0.0169731	0.0398826	0.0100268	0.0151509	0.0170935
UID1053	RGS12..6002./697	697	697-MFRAGEASKRPLPGPSPPRVRSVEVARGRAG	6002	RGS12	-0.284107	-0.124284	0.380986	-1.29443	0.0394039	-0.69382	-1.06933	-0.705282	-0.690219	-0.56118	-0.20302	-0.391814	0.6372	0.191574	0.43211	1.60253	-0.785545	-0.776156	-0.520796	-0.707865	-1.81423	-0.415014	-0.63574	0.523783	0.36187	0.386164	-0.143224	-0.36809	28		RGS12..6002.	0.0130439	0.356487	0.00888346	0.00699872	0.00917036	0.00761862	0.0224246	0.00979989	0.0169731	0.0398826	0.0100268	0.0151509	0.0170935
UID1055	RGS12..6002./698	698	698-VSTPKKLSGKSKSGRSLNEELGDEDSEKKRK	6002	RGS12	-0.0362673	-0.261408	0.0510383	-0.63706	-0.0517259	0.111658	NA	-0.222758	0.179404	-0.303772	0.0503807	NA	0.774336	-0.0506096	0.35765	0.587385	-0.242377	-0.131193	0.0266399	NA	-0.373436	0.0746455	-0.116231	0.778698	NA	0.0393009	0.184584	0.202839	24		RGS12..6002.	0.0130439	0.356487	0.00888346	0.00699872	0.00917036	0.00761862	0.0224246	0.00979989	0.0169731	0.0398826	0.0100268	0.0151509	0.0170935
UID1057	HAT1..8520./700	700	700-EQYRSYRLDIKRRLISPYKKKQRDLAKMRKC	8520	HAT1	-0.830625	-0.230141	-0.766691	-0.459162	-0.454759	0.402772	-0.393568	-0.798004	-1.0958	-1.5215	-1.05907	-1.22756	-0.668873	0.0998497	-0.695615	0.190188	-0.247486	-0.536767	-0.848712	0.0461593	-0.967904	-2.09545	-1.73443	-0.607329	-0.169181	-0.770503	-1.30938	-0.7742	28		HAT1..8520.	0.183	0.0286	0.0243	0.0877	0.0701	0.0465	0.0256	0.0347	0.195	0.0341	0.262	0.0217	0.0166
UID1061	CASK..8573./703	703	703-FNARRKLKGAVLAAVSSHKFNSFYGDPPEEL	8573	CASK	0.269756	-0.566966	1.03916	0.180887	-0.652516	0.355602	-0.254833	-0.0205193	0.232245	0.210089	0.299553	0.241772	-0.0435007	-0.00966326	-0.132382	-0.330519	0.341435	-0.410198	0.584833	-0.725614	1.27455	0.321465	1.0257	-0.197362	0.125205	-0.304226	0.857638	0.00104713	28		CASK..8573.	0.0259094	0.0246098	0.00186518	0.00858314	0.00997696	0.0155928	0.0168132	0.0121219	0.0358012	0.00219542	0.0158281	0.0155916	0.00654901
UID1065	CASK..8573./704	704	704-IVPSYRTQSSSCERDSPSTSRQSPANGHSST	8573	CASK	0.58734	1.40042	0.912737	1.52787	-0.55418	0.300427	-0.298576	-1.14427	0.262807	-1.31121	1.51087	-0.712805	0.868709	0.465711	-0.23062	-0.616893	-1.43763	-1.70108	0.777288	-1.74769	-0.575968	0.981771	-0.459316	-0.961016	0.237314	-0.266527	0.43491	1.27605	28		CASK..8573.	0.0259094	0.0246098	0.00186518	0.00858314	0.00997696	0.0155928	0.0168132	0.0121219	0.0358012	0.00219542	0.0158281	0.0155916	0.00654901
UID1068	CASK..8573./705	705	705-SITFKIVPSYRTQSSSCEDLPSTTQPKGRQI	8573	CASK	1.20095	0.708332	0.960398	0.312485	0.044679	-0.218893	0.439989	-0.16834	0.49734	0.222199	1.13063	0.122895	0.418265	0.218377	0.623801	0.86994	0.530428	0.241613	0.893088	-0.290155	0.649044	1.11676	0.687884	-0.0122814	0.123285	0.170747	1.36264	0.763725	28		CASK..8573.	0.0259094	0.0246098	0.00186518	0.00858314	0.00997696	0.0155928	0.0168132	0.0121219	0.0358012	0.00219542	0.0158281	0.0155916	0.00654901
UID1070	MYL12A..10627./706	706	706-KRTKTKTKKRPQRATSNVFAMFDQSQIQEFK	10627	MYL12A	-0.172843	-0.558378	-0.165687	-0.785354	-0.835809	-0.256987	0.0395314	1.10276	-0.451895	0.883394	-0.595125	2.5381	-0.80308	-1.06153	-0.361103	1.95841	-0.418228	0.635402	0.0483402	0.422466	0.0836849	0.101834	-0.906188	-1.1727	-0.909267	-0.868396	-0.894678	0.574832	28		MYL12A..10627.	0.068916	0.0146948	0.0470239	0.247944	0.229939	0.120413	0.222676	0.086073	0.0690868	0.0301963	0.109683	0.0292308	0.306469
UID1078	PPP1R12A..4659./707	707	707-QKKQNLLHSEKRDKKSPLIESTANMDNNQSQ	4659	PPP1R12A	-0.0927021	-0.407121	0.252939	-0.0040253	0.629982	0.243774	1.35934	0.101399	-0.091297	0.689675	-0.118486	0.99142	0.15141	0.0509771	0.106142	0.529181	-0.0690195	1.02073	0.212076	0.180053	0.00594012	1.11053	0.237388	0.155525	-0.410161	0.0750968	0.820301	1.02237	28		PPP1R12A..4659.	0.98	0.913	0.952	0.917	0.78	0.472	0.936	0.935	0.908	0.942	0.921	0.748	0.781
UID1079	PPP1R12A..4659./708	708	708-LLHSEKRDKKSPLIESTANMDNNQSQKTFKN	4659	PPP1R12A	0.208514	-1.00872	-0.581604	0.139486	0.250737	-0.388388	2.05531	NA	-0.409472	-0.231924	0.004951	-0.110353	NA	NA	-0.148547	0.180239	-0.743726	0.524134	-0.0769262	0.377919	NA	0.380348	0.237078	-0.0784035	-0.261648	-0.114395	1.14938	0.973075	24		PPP1R12A..4659.	0.98	0.913	0.952	0.917	0.78	0.472	0.936	0.935	0.908	0.942	0.921	0.748	0.781
UID1080	PPP1R12A..4659./709	709	709-PTSPIKKFPTTATKISPKEEERKDESPATWR	4659	PPP1R12A	-0.0315728	-0.508573	-0.312693	-0.45773	-0.0483036	0.372753	0.477731	-0.376876	-0.136464	-0.630501	-0.735076	-1.83868	-0.149929	0.457833	-0.646219	-1.35887	-0.6114	-0.514508	-0.643634	-0.496911	-0.429308	0.418162	-0.70294	0.860164	-0.258175	-0.406882	0.373161	-0.488061	28		PPP1R12A..4659.	0.98	0.913	0.952	0.917	0.78	0.472	0.936	0.935	0.908	0.942	0.921	0.748	0.781
UID1081	PPP1R12A..4659./710	710	710-DESPATWRLGLRKTGSYGALAEITASKEGQK	4659	PPP1R12A	-0.185867	0.412216	0.491156	0.000446796	0.363502	0.805096	0.858802	-0.177415	0.0230435	1.19315	-0.488797	0.0383558	-0.0222762	0.278252	-0.0336657	-0.0416285	0.421169	0.267448	-0.38337	-0.0418744	0.551052	0.559464	-0.118143	0.00629298	-0.524055	-0.466776	-0.194067	0.679262	28		PPP1R12A..4659.	0.98	0.913	0.952	0.917	0.78	0.472	0.936	0.935	0.908	0.942	0.921	0.748	0.781
UID1082	PPP1R12A..4659./711	711	711-TRLAYVAPTIPRRLASTSDIEEKENRDSSSL	4659	PPP1R12A	0.576881	-0.448926	0.0601317	-1.64525	0.547522	-0.23578	-0.0404024	0.137926	0.60754	1.81588	-0.817124	0.687674	-0.690207	-0.0752138	-0.404093	0.79542	1.26252	0.00973431	-0.0848379	1.45967	0.868732	0.521658	-0.553744	-0.171687	-0.867926	-0.827826	-0.758131	0.323004	28		PPP1R12A..4659.	0.98	0.913	0.952	0.917	0.78	0.472	0.936	0.935	0.908	0.942	0.921	0.748	0.781
UID1083	PPP1R12A..4659./712	712	712-LAYVAPTIPRRLASTSDIEEKENRDSSSLRT	4659	PPP1R12A	0.731032	-0.518239	0.185064	-0.0705462	1.24246	0.860945	0.580365	0.12747	0.415446	1.64971	-0.831549	0.984902	0.837055	0.398359	-0.0255437	0.621233	1.30421	0.086539	0.321673	1.41442	NA	NA	-0.315311	-0.0570698	-0.268035	-1.15325	-0.118194	0.799854	26		PPP1R12A..4659.	0.98	0.913	0.952	0.917	0.78	0.472	0.936	0.935	0.908	0.942	0.921	0.748	0.781
UID1086	PPP1R12A..4659./715	715	715-TAGVTRSASSPRLSSSLDNKEKEKDSKGTRL	4659	PPP1R12A	0.104812	-0.15589	NA	-0.135498	NA	0.0164509	0.194264	-0.0864019	-0.0649924	-0.333761	0.0431566	0.106688	0.0618916	-0.284214	-0.50989	1.0444	-0.257593	0.130954	-0.305653	0.209632	NA	NA	0.0609884	-0.108944	-0.249965	-0.181661	-0.331546	0.0730801	24		PPP1R12A..4659.	0.98	0.913	0.952	0.917	0.78	0.472	0.936	0.935	0.908	0.942	0.921	0.748	0.781
UID1087	PPP1R12A..4659./716	716	716-AGTQSSTSNRLWAEDSTEKEKDSVPTAVTIP	4659	PPP1R12A	1.75253	-0.774388	-0.138817	0.291633	-0.46244	NA	-0.151308	0.789104	NA	-1.04741	0.772266	0.4281	0.356935	-1.12754	0.910649	0.230095	-0.033133	0.340545	-0.160202	-0.260063	-0.634596	-0.813101	0.374458	-0.24659	0.514555	-0.0148792	0.410071	NA	25		PPP1R12A..4659.	0.98	0.913	0.952	0.917	0.78	0.472	0.936	0.935	0.908	0.942	0.921	0.748	0.781
UID1088	PPP1R12A..4659./717	717	717-LEMEKRERRALERRISEMEEELKMLPDLKAD	4659	PPP1R12A	0.0331562	-0.0207782	0.0932929	-0.178776	0.554139	0.305822	0.693053	-0.0741905	0.102875	3.16664	0.554196	0.179161	0.676281	-0.0630894	0.751152	1.60933	0.48265	0.512827	0.199032	0.2353	-0.276482	0.254328	-0.364541	0.889862	-0.00238927	-0.0385005	-0.186001	0.592538	28		PPP1R12A..4659.	0.98	0.913	0.952	0.917	0.78	0.472	0.936	0.935	0.908	0.942	0.921	0.748	0.781
UID1090	PPP1R12A..4659./718	718	718-SSTSAGDRYDSLLGRSGSYSYLEERKPYSSR	4659	PPP1R12A	-0.139355	-0.758615	1.58656	0.686335	0.306737	2.17923	0.218895	0.0314217	-0.213729	1.26253	NA	0.473903	0.0474868	-0.207482	0.158819	0.595375	NA	NA	NA	0.295743	2.1538	0.925134	NA	0.204621	-0.151386	0.345557	0.28751	0.83853	23		PPP1R12A..4659.	0.98	0.913	0.952	0.917	0.78	0.472	0.936	0.935	0.908	0.942	0.921	0.748	0.781
UID1091	PPP1R12A..4659./719	719	719-TSAGDRYDSLLGRSGSYSYLEERKPYSSRLE	4659	PPP1R12A	NA	0.261021	0.867598	0.686601	0.305799	0.965017	NA	0.239797	0.353172	1.253	0.0152874	0.963918	0.408411	0.316015	0.244004	0.326717	1.62563	0.249787	-0.24049	-0.00133324	NA	0.636699	0.148245	0.387684	0.292647	-0.079123	NA	0.796628	24		PPP1R12A..4659.	0.98	0.913	0.952	0.917	0.78	0.472	0.936	0.935	0.908	0.942	0.921	0.748	0.781
UID1092	PPP1R12A..4659./720	720	720-AGDRYDSLLGRSGSYSYLEERKPYSSRLEKD	4659	PPP1R12A	0.707474	-0.117718	1.52497	0.469924	NA	1.20466	2.68777	0.21731	0.100747	NA	-0.0152595	0.74691	0.398859	0.164928	0.196022	0.741268	2.50792	0.269976	0.0695987	0.689825	3.01451	NA	0.231814	0.298044	-0.1145	0.443334	1.15142	NA	24		PPP1R12A..4659.	0.98	0.913	0.952	0.917	0.78	0.472	0.936	0.935	0.908	0.942	0.921	0.748	0.781
UID1095	PPP1R12A..4659./721	721	721-SFWTQDSDENEQEQQSDTEEGSNKKETQTDS	4659	PPP1R12A	-0.0457067	-0.259556	-0.0241617	0.667068	-0.00184107	0.0676277	0.450367	0.187068	0.480526	1.06928	0.0758994	NA	0.24614	0.183238	0.475976	0.423798	0.10209	0.129402	0.191767	NA	0.19195	0.869078	0.250678	0.387619	NA	0.44359	1.04278	0.999184	25		PPP1R12A..4659.	0.98	0.913	0.952	0.917	0.78	0.472	0.936	0.935	0.908	0.942	0.921	0.748	0.781
UID1096	PPP1R12A..4659./722	722	722-AGTVSSTTEVRERRRSYLTPVRDEESESQRK	4659	PPP1R12A	0.298384	0.0106339	0.0468912	NA	0.191663	NA	NA	NA	NA	1.57185	-0.259829	NA	NA	0.207245	-0.175235	0.431343	1.29224	0.869459	-0.0591106	NA	0.781743	0.773589	-0.434082	NA	NA	-0.327545	0.100361	NA	17		PPP1R12A..4659.	0.98	0.913	0.952	0.917	0.78	0.472	0.936	0.935	0.908	0.942	0.921	0.748	0.781
UID1101	GAK..2580./724	724	724-QDVGSGREYALKRLLSNEEEKNRAIIQEVCF	2580	GAK	-0.379274	-0.337706	0.100255	-0.236176	-0.251527	-0.448708	NA	-0.29883	-0.0108333	1.5921	0.320174	NA	-0.129015	-0.0721469	0.395404	0.120487	0.518366	0.000680208	0.0308218	NA	0.458761	-0.0803256	0.219959	-0.239442	NA	-0.23955	-0.131975	-0.0781736	24		GAK..2580.	0.7264	0.193462	0.818244	0.682433	0.600057	0.944235	0.457771	0.826534	0.76437	0.380746	0.231163	0.88205	0.451635
UID1102	GAK..2580./725	725	725-DAGAGSPEAEPTDSDSPPSSSADASRFLHTL	2580	GAK	-0.0159559	-0.0545201	0.470148	NA	0.347525	NA	NA	NA	NA	-0.0901525	0.0217323	NA	NA	0.359103	0.347188	-0.169958	0.351574	-0.263681	-0.233838	NA	0.2415	0.237915	0.136688	NA	NA	-0.382674	0.519702	NA	17		GAK..2580.	0.7264	0.193462	0.818244	0.682433	0.600057	0.944235	0.457771	0.826534	0.76437	0.380746	0.231163	0.88205	0.451635
UID1110	ZNF263..10127./727	727	727-TERSPGPRLQELLGPSPQRDPQAVKERALSA	10127	ZNF263	-0.0609463	-0.0528426	0.0311171	0.00861907	-0.454159	0.610784	-0.0595884	-0.214959	-0.306066	-0.374729	-0.147883	-0.712543	-0.270199	0.0835648	-0.329124	-0.162698	0.151564	0.0109653	0.607405	0.380643	-0.192312	-0.168128	-0.119317	-0.395814	0.15347	0.183115	-0.645847	0.279268	28		ZNF263..10127.	0.0080644	0.103637	0.16245	0.0466408	0.0491068	0.0865307	0.0223427	0.0209659	0.0470478	0.0206557	0.0166446	0.0746853	0.0129006
UID1111	HNRNPDL..9987./728	728	728-LKGKEPPKKVFVGGLSPDTSEEQIKEYFGAF	9987	HNRNPDL	0.488373	0.160876	0.0524883	0.208416	0.321079	0.597474	0.0313285	-0.0976057	-0.111484	0.782875	0.230855	0.291158	-0.213555	-0.115432	0.189547	0.417089	0.503195	0.106983	0.261406	0.434648	0.422175	-0.182011	0.171629	0.0192509	0.437078	-0.146276	0.437721	-0.131684	28		HNRNPDL..9987.	0.0481937	0.0880524	0.181302	0.15805	0.0747277	0.0446093	0.00903601	0.0633607	0.0305228	0.045747	0.0549882	0.0168086	0.0990288
UID1116	XPO1..7514./730	730	730-IALRQADEEKHKRQMSVPGIFNPHEIPEEMC	7514	XPO1	0.251698	0.0530162	0.328569	-0.0810499	NA	-0.046303	0.11063	0.00922298	0.0848658	0.810922	0.16933	0.266342	0.00426221	-0.249421	0.439479	0.462869	0.814897	0.07776	0.0275736	0.293239	NA	NA	0.0758867	0.0366354	0.232967	0.478714	-0.0570755	-0.627149	25		XPO1..7514.	0.989547	0.936716	0.946899	0.962707	0.999986	0.836529	0.976192	0.989951	0.999798	0.9769	0.225917	1	0.987654
UID1120	BTAF1..9044./732	732	732-PRTRQEPTSESSMEDSPTTERLNFDRFDICR	9044	BTAF1	0.404319	0.140975	-0.555792	-0.0596571	-0.0728951	-0.251301	0.110506	-0.734535	0.16684	-0.0139267	0.141789	-1.40998	0.37912	1.18787	0.0780656	-0.853087	-0.291631	-0.228408	-0.736207	0.0358903	NA	-0.357525	-0.685887	1.30534	0.882324	-0.350394	-0.304011	-0.525689	27		BTAF1..9044.	0.681736	0.0726152	0.335053	0.192358	0.71749	0.95579	0.527429	0.461376	0.31999	0.673289	0.319792	0.374619	0.390876
UID1121	BTAF1..9044./733	733	733-KNKAKRMAKLFAKQRSRDAVETNEKSNDSTD	9044	BTAF1	1.38447	0.606664	NA	0.780158	NA	0.142155	-0.137942	0.18377	0.612908	0.561976	1.7567	-0.14853	0.638901	0.63485	1.06974	-0.0338736	-0.102288	0.570673	0.271756	0.983521	NA	NA	0.249252	0.175798	1.75952	0.0060091	0.216072	-0.252099	24		BTAF1..9044.	0.681736	0.0726152	0.335053	0.192358	0.71749	0.95579	0.527429	0.461376	0.31999	0.673289	0.319792	0.374619	0.390876
UID1122	PIP5K1B..8395./734	734	734-PSKKRCNSIAALKATSQEIVSSISQEWKDEK	8395	PIP5K1B	0.197535	0.176541	1.03832	2.03033	-1.05584	-0.7502	1.35741	0.219755	0.544905	0.0967238	-0.174053	-0.788259	0.741351	0.543531	0.0773048	-0.988029	-0.593414	-0.769334	-0.463204	-0.868615	1.58382	-0.280253	0.703625	-1.01921	0.361498	-0.674844	0.649254	-0.280422	28		PIP5K1B..8395.	0.0334835	0.00518408	0.0070273	0.00227573	0.00918704	0.00557414	0.0102201	0.00939128	0.00222713	0.00475452	0.420475	0.0192369	0.00307645
UID1126	PIP5K1B..8395./735	735	735-FMNSRVFKKIQALKASPSKKRCNSIAALKAT	8395	PIP5K1B	-0.171694	0.376436	1.02031	1.73719	-0.734166	-0.922281	1.42681	-0.562074	0.271744	-0.524585	-0.23153	-1.0312	0.68355	0.497899	1.23659	-0.959093	0.163335	-1.00953	-0.243781	-1.24307	1.19894	-0.329529	1.00237	-0.986357	-1.38172	-0.680203	1.76454	-0.808781	28		PIP5K1B..8395.	0.0334835	0.00518408	0.0070273	0.00227573	0.00918704	0.00557414	0.0102201	0.00939128	0.00222713	0.00475452	0.420475	0.0192369	0.00307645
UID1129	SYN3..8224./736	736	736-LSPQSGSPQQQRSPGSPQLSRASSGSSPNQA	8224	SYN3	NA	0.168823	-0.265232	0.186518	-0.551416	-0.433897	NA	NA	2.5187	-0.320263	1.7435	-1.32585	NA	NA	3.36686	0.213281	-0.224496	-0.460579	-0.492458	-0.561307	NA	0.560215	-0.344118	-0.265795	-0.689802	-0.397501	NA	-0.624914	21		SYN3..8224.	0.0269577	0.0222349	0.0201141	0.0327725	0.0137203	0.027985	0.0438434	0.12049	0.0179948	0.0304786	0.0103795	0.0175326	0.0105785
UID1133	ARHGEF10..9639./739	739	739-TRAAVKRGRSFIRTKSLIAQDHRSSLEEEQN	9639	ARHGEF10	-0.0369064	-0.235288	-0.0464444	0.0136828	0.554099	-0.990862	-0.0672658	-0.71021	0.030385	0.748365	-0.346574	0.567093	0.126181	0.154647	-0.95046	0.53574	-0.706217	0.393938	-0.298219	0.0593498	0.712496	-0.111492	-0.649266	0.124891	-0.35701	-0.518466	-0.402591	NA	27		ARHGEF10..9639.	0.018194	0.0161407	0.00815917	0.0171816	0.0144707	0.0105354	0.0345503	0.014852	0.0135807	0.00289358	0.0364851	0.013972	0.0100403
UID1134	ARHGEF10..9639./740	740	740-LATALHEKDKDKSRDSLAPGPEPQDEDQKDA	9639	ARHGEF10	0.48701	NA	0.346763	0.212131	0.610131	-0.675985	0.525998	-0.883333	-0.144672	NA	-0.10265	0.698198	-0.0908265	0.545378	-0.449175	2.67365	-0.285484	1.49912	0.51785	0.237442	0.185692	0.173458	0.205345	0.893942	-0.356101	-0.443652	-0.584807	-0.0883255	26		ARHGEF10..9639.	0.018194	0.0161407	0.00815917	0.0171816	0.0144707	0.0105354	0.0345503	0.014852	0.0135807	0.00289358	0.0364851	0.013972	0.0100403
UID1137	ZNF609..23060./741	741	741-SPLTPGKVCRAEEGKSPFRESSGDGMKMEGL	23060	ZNF609	-0.522788	-1.21995	-0.362342	-0.848293	-0.617352	-0.15457	-0.773081	0.173177	-0.550718	-0.254669	-0.155917	-1.48318	-0.709465	-2.49049	-1.27755	-0.103084	-0.212043	-0.86396	-0.541881	-0.0371931	-0.675411	-0.911872	-0.823005	-0.544875	-0.0767956	-0.210696	-1.15523	-0.56833	28		ZNF609..23060.	0.0241	0.0226	0.00515	0.00703	0.0355	0.0176	0.0388	0.011	0.042	0.0293	0.00541	0.0182	0.0251
UID1138	ZNF609..23060./742	742	742-WKQKPSIPPTLTKAPSLTDLVKSGPGKAKEP	23060	ZNF609	-0.314593	-0.913108	-0.087602	-1.48063	-0.80252	-0.130161	-0.450225	0.650682	-0.986027	-0.458403	0.0794037	-1.00137	-0.619661	-3.08083	-1.17359	-0.465776	-0.596576	-1.00698	-0.597554	-0.435272	-0.516718	-0.66945	-0.677186	-0.534483	0.253377	0.0963891	-0.983305	-0.770074	28		ZNF609..23060.	0.0241	0.0226	0.00515	0.00703	0.0355	0.0176	0.0388	0.011	0.042	0.0293	0.00541	0.0182	0.0251
UID1139	ZNF609..23060./743	743	743-GSKVSGGEDADKARASPSVTCKSSSESKALD	23060	ZNF609	-0.372742	-1.46527	-1.29829	-0.888683	-0.920504	-0.426311	-0.900965	0.182899	-0.516288	-1.11208	-0.802215	-1.53136	-0.471652	-2.14303	-1.32042	0.267831	-0.847014	-1.25091	-0.941944	-0.943783	-1.86416	-1.14318	-0.878766	-0.601702	0.13387	-1.02681	-1.42371	-0.286217	28		ZNF609..23060.	0.0241	0.0226	0.00515	0.00703	0.0355	0.0176	0.0388	0.011	0.042	0.0293	0.00541	0.0182	0.0251
UID1140	ZNF609..23060./744	744	744-KVSGGEDADKARASPSVTCKSSSESKALDIL	23060	ZNF609	-0.676263	-1.31876	NA	-1.21854	-0.939521	-0.610397	-1.37983	NA	-0.844472	NA	-1.17127	-1.63185	NA	NA	-1.31618	-0.164751	-1.18047	NA	-1.15308	-1.18386	NA	-1.08866	-0.811373	-0.865982	-0.150744	-1.18194	-1.70561	-0.752958	21		ZNF609..23060.	0.0241	0.0226	0.00515	0.00703	0.0355	0.0176	0.0388	0.011	0.042	0.0293	0.00541	0.0182	0.0251
UID1143	ZNF609..23060./746	746	746-LGSCNGASVSQKGSLSPARSATPKVRLVEPH	23060	ZNF609	-0.542894	-1.21147	-0.0148684	-0.956087	-0.170475	-0.349229	-0.839774	0.108434	-0.448182	0.0389037	0.00844145	-1.55444	-0.59741	-1.80229	-0.728775	-0.123298	-0.0852205	-0.689573	-0.633894	-0.0931261	-0.815418	-0.697624	-0.85992	-0.167399	-0.0739708	-0.0954425	-0.802079	-0.432708	28		ZNF609..23060.	0.0241	0.0226	0.00515	0.00703	0.0355	0.0176	0.0388	0.011	0.042	0.0293	0.00541	0.0182	0.0251
UID1144	ZNF609..23060./747	747	747-KAEADKIYSFTDNAPSPSIGGSSRLENTTPT	23060	ZNF609	-0.121307	-0.422769	-0.235081	-0.385341	-0.0836048	-0.163124	-0.0582647	0.00523218	-0.323291	0.091729	-0.162868	-0.249967	-0.204092	-0.602105	-0.36729	0.0531508	-0.117469	-0.204883	-0.193842	-0.084655	-0.277524	-0.278357	-0.127722	-0.0532875	-0.0845515	-0.05056	-0.286119	-0.30368	28		ZNF609..23060.	0.0241	0.0226	0.00515	0.00703	0.0355	0.0176	0.0388	0.011	0.042	0.0293	0.00541	0.0182	0.0251
UID1145	ZNF609..23060./748	748	748-PARSATPKVRLVEPHSPSPSSKFSTKGLCKK	23060	ZNF609	-0.512785	-0.610489	0.125536	-0.621097	0.00993299	-0.140769	-0.573766	0.521664	-0.189147	-0.0194862	-0.0194345	-1.15925	-0.297404	-1.0465	-0.70748	-0.359125	0.0132623	-0.70904	-0.264251	0.0835967	-0.340054	-0.367159	-0.399407	-0.0465787	-0.000561396	0.0832628	-0.523537	-0.544689	28		ZNF609..23060.	0.0241	0.0226	0.00515	0.00703	0.0355	0.0176	0.0388	0.011	0.042	0.0293	0.00541	0.0182	0.0251
UID1148	ZNF609..23060./750	750	750-NECRLLKKVKSEKMESPVSTPAVLPIHLLVP	23060	ZNF609	-0.172024	-0.140553	0.021437	-0.62569	-0.351372	-0.556721	0.333111	0.145459	-0.339878	0.234344	-0.0604218	-0.156225	-0.103109	-0.577108	-0.677578	-0.306252	-0.337287	-0.0675998	-0.197245	0.216499	-0.373324	-0.425631	-0.379753	0.0621961	-0.17433	-0.142609	-0.203157	-0.141847	28		ZNF609..23060.	0.0241	0.0226	0.00515	0.00703	0.0355	0.0176	0.0388	0.011	0.042	0.0293	0.00541	0.0182	0.0251
UID1149	ZNF609..23060./751	751	751-EMRNGRGRGKRMRPNSNTPVNETATASDSKG	23060	ZNF609	-0.759316	NA	NA	-0.76394	0.188493	0.0667853	-0.862247	0.250865	-0.238436	1.15644	NA	-1.22192	0.0989034	-1.14066	-0.558153	-0.450296	NA	-0.0833144	NA	-1.00119	-0.200317	-0.881721	NA	0.0922216	-0.472822	0.198316	-0.247772	-0.80305	22		ZNF609..23060.	0.0241	0.0226	0.00515	0.00703	0.0355	0.0176	0.0388	0.011	0.042	0.0293	0.00541	0.0182	0.0251
UID1150	ZNF609..23060./752	752	752-PGTKVEPTVLDRNCPSPVLIDCPHPNCNKKY	23060	ZNF609	-0.367383	-0.698282	0.322859	-0.590643	0.0183519	-0.272798	-0.291089	0.0978015	-0.499422	-0.0290233	0.168903	-1.08813	-0.0660035	-1.08173	-0.579107	-0.224829	-0.249715	-0.924284	-0.375375	0.0427833	-0.542121	-0.948579	-0.504187	-0.115296	-0.154835	0.0187047	-0.589105	-0.796468	28		ZNF609..23060.	0.0241	0.0226	0.00515	0.00703	0.0355	0.0176	0.0388	0.011	0.042	0.0293	0.00541	0.0182	0.0251
UID1152	ZNF609..23060./754	754	754-SSKTRAGANSKGRRGSQNSSEHRPPASSTSE	23060	ZNF609	0.343116	-1.05058	0.498709	-0.906574	0.147349	0.135665	-0.450158	0.269357	0.337542	1.30624	0.147345	-0.604219	0.125785	-1.3423	-0.134634	-0.22684	0.74932	-0.619919	-0.599226	0.47825	0.572237	0.00277901	-1.06057	0.27277	-0.332067	0.0603676	-0.188406	0.216807	28		ZNF609..23060.	0.0241	0.0226	0.00515	0.00703	0.0355	0.0176	0.0388	0.011	0.042	0.0293	0.00541	0.0182	0.0251
UID1156	ZNF609..23060./756	756	756-ALDILQQHASHYKSKSPTISDKTSQERDRGG	23060	ZNF609	-0.337294	-1.40882	-0.168154	-0.964872	-0.608197	-0.366076	-0.777527	-0.00467873	-0.602377	-0.219959	-0.295261	-1.93972	-0.629144	-2.9374	-1.09024	-0.190437	0.0233286	-0.892733	-0.758856	-0.76687	-0.951231	-0.831467	-0.831264	-0.436584	0.0684789	-0.420212	-1.0529	-0.716129	28		ZNF609..23060.	0.0241	0.0226	0.00515	0.00703	0.0355	0.0176	0.0388	0.011	0.042	0.0293	0.00541	0.0182	0.0251
UID1157	ZNF609..23060./757	757	757-SSSEDSKGSKRVRTNSMGSATGPLPGTKVEP	23060	ZNF609	0.16575	-0.281476	1.12903	-0.0419354	0.541507	0.196918	0.397628	0.247439	0.141073	0.705523	0.596516	-0.0604493	0.281657	-0.448377	0.0294104	0.527199	0.853808	0.280281	-0.223326	0.625495	0.489037	0.176029	0.440606	0.665001	-0.149364	-0.0955954	0.581472	-0.155508	28		ZNF609..23060.	0.0241	0.0226	0.00515	0.00703	0.0355	0.0176	0.0388	0.011	0.042	0.0293	0.00541	0.0182	0.0251
UID1162	ZNF646..9726./759	759	759-EEGEEEGVAEAAPARSPPLQLSEAELLNQLQ	9726	ZNF646	-0.0652035	0.131934	-0.0274194	-0.178261	-0.17015	0.0639008	0.0498009	0.106085	0.075342	0.0861637	0.0418518	0.685387	-0.0998252	-0.029665	-0.202823	-0.0398343	0.125919	0.0300899	0.11205	-0.0643678	0.0494397	-0.0219609	-0.126466	-0.23266	-0.061986	0.025438	-0.0575573	0.108529	28		ZNF646..9726.	0.0633301	0.130114	0.020051	0.0869686	0.0677239	0.210626	0.0365405	0.0855964	0.0678532	0.0373848	0.00514436	0.0410725	0.0390643
UID1163	ZNF646..9726./760	760	760-HGAGEKENSRTETTMSPPRAFACRDCGKSYR	9726	ZNF646	-0.168758	0.208097	0.0142094	-0.225683	-0.169246	0.0200877	-0.0893386	-0.447679	0.133417	-0.410915	0.598913	0.396287	-0.0865936	0.142414	-0.167607	-0.148497	0.130391	0.259571	-0.168617	-0.15186	0.131916	0.102868	-0.0273964	-0.453023	-0.0431	-0.362011	-0.309047	0.325254	28		ZNF646..9726.	0.0633301	0.130114	0.020051	0.0869686	0.0677239	0.210626	0.0365405	0.0855964	0.0678532	0.0373848	0.00514436	0.0410725	0.0390643
UID1166	SPTBN2..6712./761	761	761-SEGNIHADKIREKADSIERRHKKNQDAAQQF	6712	SPTBN2	0.111269	-0.679415	1.09305	0.993556	-0.271748	NA	0.118599	-0.263586	NA	-0.127006	0.00851727	1.04129	0.707469	0.835646	0.432115	-0.186997	0.260158	0.0694513	-0.20874	0.861486	0.0399675	NA	-0.0904632	1.01922	0.561031	1.19853	0.586004	NA	24		SPTBN2..6712.	0.0262524	0.0497088	0.0038289	0.019309	0.0821446	0.0813197	0.00401505	0.00816219	0.0301669	0.00714222	0.0405881	0.0811705	0.0229705
UID1170	MAST4..375449./764	764	764-DPNTMGGASHRDRALSVTATVGETKGKDPAP	375449	MAST4	0.337058	NA	NA	-0.272688	-0.507753	-0.301731	-0.160928	0.148517	-0.538331	NA	NA	0.300124	0.0311627	-0.22	-0.353099	0.868284	NA	NA	NA	1.87101	0.896549	-0.354218	NA	-0.415884	0.0637536	-0.138562	-0.120896	-0.171527	20		MAST4..375449.	0.0240141	0.072131	0.0197067	0.0953183	0.0261436	0.0523651	0.0249271	0.074883	0.0193472	0.109319	0.0065612	0.292214	0.073373
UID1171	MAST4..375449./765	765	765-SSSGKKNDTTSARELSPSSLKMNKSYLLEPW	375449	MAST4	-0.410316	-0.788328	-0.719	-0.81337	-1.99013	-0.81254	-0.905794	NA	-1.17183	-0.645976	-1.37028	-0.757749	NA	NA	0.527822	0.206723	-1.59503	0.163196	-0.867741	2.02773	NA	-1.12413	-0.354486	-0.715075	-0.381671	-0.798607	-0.394316	-0.97681	24		MAST4..375449.	0.0240141	0.072131	0.0197067	0.0953183	0.0261436	0.0523651	0.0249271	0.074883	0.0193472	0.109319	0.0065612	0.292214	0.073373
UID1176	MAST4..375449./770	770	770-GCLKRPVSRKVGRQESVDDLDRDKLKAKVVV	375449	MAST4	-0.209888	-0.736208	-1.11576	-0.657644	-1.91886	-1.06622	-1.16919	-0.773707	-0.964849	-0.515442	-1.07705	-1.12727	-0.125418	-1.08772	1.08728	-0.829704	-1.54146	0.0449636	-0.719467	0.657842	-1.00315	-0.68334	-0.211978	-0.93459	-0.372239	-0.695008	0.218061	-1.23585	28		MAST4..375449.	0.0240141	0.072131	0.0197067	0.0953183	0.0261436	0.0523651	0.0249271	0.074883	0.0193472	0.109319	0.0065612	0.292214	0.073373
UID1177	MAST4..375449./771	771	771-CPTLCKQTDNRQTDKSPSQPAANTDRRAEGK	375449	MAST4	-0.366963	-0.539071	-0.967113	-0.510043	-1.46053	-0.579212	NA	-0.791615	-1.41761	-0.64292	NA	NA	-1.02206	-1.11291	NA	NA	NA	0.442611	NA	NA	-1.34467	-0.875892	NA	-0.425878	NA	NA	-0.330573	-0.695368	17		MAST4..375449.	0.0240141	0.072131	0.0197067	0.0953183	0.0261436	0.0523651	0.0249271	0.074883	0.0193472	0.109319	0.0065612	0.292214	0.073373
UID1178	MAST4..375449./772	772	772-TLCKQTDNRQTDKSPSQPAANTDRRAEGKKC	375449	MAST4	-0.718473	-0.642926	-1.34287	-0.455784	-1.57056	-0.442356	-0.855179	-1.31534	-0.972151	-0.759089	-1.58964	-0.8341	-1.00769	NA	-0.347087	0.314446	-1.27377	0.473716	-0.552208	1.58453	NA	-0.748819	-0.790501	-0.732756	-0.617144	-0.579765	-0.444127	-0.735925	26		MAST4..375449.	0.0240141	0.072131	0.0197067	0.0953183	0.0261436	0.0523651	0.0249271	0.074883	0.0193472	0.109319	0.0065612	0.292214	0.073373
UID1179	MAST4..375449./773	773	773-HFSFVPARRTDGRRWSLASLPSSGYGTNTPS;SAHFSFARRTDGRRWSLASLPSSGYGTNTPS	375449	MAST4	0.466778	NA	-0.244565	0.00477719	NA	0.0313981	-0.165334	-0.234618	0.178522	0.599037	-0.654397	0.534752	-0.115877	-0.444395	NA	NA	-0.401463	0.409655	-0.205832	2.22922	0.55279	NA	0.207359	-0.0343142	-0.482408	NA	0.286763	0.0277119	22		MAST4..375449.	0.0240141	0.072131	0.0197067	0.0953183	0.0261436	0.0523651	0.0249271	0.074883	0.0193472	0.109319	0.0065612	0.292214	0.073373
UID1181	MAST4..375449./775	775	775-YGTNTPSSTVSSSCSSQEKLHQLPFQPTADE;YGTNTPSSTVSSSCSSQEKLHQLPYQPTPDE	375449	MAST4	-0.178594	0.365793	NA	NA	NA	NA	-0.520773	NA	NA	NA	-0.0545301	-0.0671358	NA	NA	0.325386	-0.234328	-0.646037	NA	-0.473883	-0.101779	NA	NA	-0.56351	NA	-0.399957	0.0746202	0.0788927	NA	14		MAST4..375449.	0.0240141	0.072131	0.0197067	0.0953183	0.0261436	0.0523651	0.0249271	0.074883	0.0193472	0.109319	0.0065612	0.292214	0.073373
UID1183	MAST4..375449./776	776	776-IVRHIVRPKSAEPPRSPLLKRVQSEEKLSPS;LGRQLSRPKSAEPPRSPLLKRVQSAEKLAAA;PPVVRPRPKSAEPPRSPLLKRVQSAEKLGAS	375449	MAST4	0.250858	0.478498	-0.146697	1.22413	0.187818	-0.132063	0.0708351	-0.589428	0.467502	0.0623534	-0.36832	-0.26218	-0.435935	-0.497322	0.421121	0.79578	0.258334	-0.527144	-0.0520272	2.01219	-0.336627	-0.219832	0.12873	1.06086	-0.377387	0.194923	-0.0425904	NA	27		MAST4..375449.	0.0240141	0.072131	0.0197067	0.0953183	0.0261436	0.0523651	0.0249271	0.074883	0.0193472	0.109319	0.0065612	0.292214	0.073373
UID1184	MAST4..375449./777	777	777-APKLGGQRYRSGRRKSAGNIPLSPLARTPSP	375449	MAST4	-0.0298879	-0.518496	-0.496258	-0.554072	-1.50617	-0.53293	-0.948189	-0.435903	-0.408762	0.710241	-0.58336	0.0212793	-0.490611	-0.961302	0.0553451	0.333089	-0.664297	-0.0275867	-0.424856	2.14266	-0.0398264	-0.913265	-0.241282	-0.795079	-0.504607	-0.429213	-0.333066	-0.820838	28		MAST4..375449.	0.0240141	0.072131	0.0197067	0.0953183	0.0261436	0.0523651	0.0249271	0.074883	0.0193472	0.109319	0.0065612	0.292214	0.073373
UID1185	MAST4..375449./778	778	778-RYRSGRRKSAGNIPLSPLARTPSPTPQPTSP	375449	MAST4	-0.567886	-0.615678	-0.721446	-0.0898798	-1.20635	-0.99436	-0.570443	-0.809667	-0.663118	-0.779916	-0.715534	-0.7887	-0.582055	-0.953599	0.187866	0.311028	-1.40698	0.202899	-0.623741	0.990026	-0.985799	-0.38178	0.158339	-0.685122	-0.488819	-0.361756	-0.212073	-0.598929	28		MAST4..375449.	0.0240141	0.072131	0.0197067	0.0953183	0.0261436	0.0523651	0.0249271	0.074883	0.0193472	0.109319	0.0065612	0.292214	0.073373
UID1186	MAST4..375449./779	779	779-AQPAGEGRTHMTKSDSLPSFRVSTLPLESHH	375449	MAST4	0.66594	-0.406109	0.592865	-0.323859	-0.661317	-0.482472	NA	-0.630589	-0.651809	0.360795	-0.664019	NA	-0.113871	-0.537647	0.0681849	0.197948	0.116927	0.17999	-0.565845	NA	0.911681	-0.492787	0.0536847	-0.450869	NA	-0.368652	0.0599523	-0.395109	24		MAST4..375449.	0.0240141	0.072131	0.0197067	0.0953183	0.0261436	0.0523651	0.0249271	0.074883	0.0193472	0.109319	0.0065612	0.292214	0.073373
UID1187	MAST4..375449./780	780	780-PPTEADKPNGMKRSPSATGQSSFRSTALPEK	375449	MAST4	0.186432	-0.359132	-0.18904	-0.132563	-1.28836	0.210464	0.594033	0.130879	-0.719714	1.07385	-0.843052	-0.493354	0.694019	-1.11308	0.470348	0.176418	-0.252645	0.506685	-0.389563	1.30124	0.461128	-0.67419	0.0137205	-0.432609	-0.218045	-0.747825	0.0563266	-0.290379	28		MAST4..375449.	0.0240141	0.072131	0.0197067	0.0953183	0.0261436	0.0523651	0.0249271	0.074883	0.0193472	0.109319	0.0065612	0.292214	0.073373
UID1188	MAST4..375449./781	781	781-IALLSGPQASKTELPSPESAQSPSPSGDVRA	375449	MAST4	-0.115528	NA	NA	-0.016123	0.0837641	-0.0317168	0.247065	-0.00337505	-0.0871804	-0.131296	NA	0.343515	0.0606129	0.0613832	0.752077	0.331516	NA	0.178073	NA	0.448292	-0.122722	0.119888	NA	0.0550969	0.160253	0.318425	0.150815	-0.0373039	22		MAST4..375449.	0.0240141	0.072131	0.0197067	0.0953183	0.0261436	0.0523651	0.0249271	0.074883	0.0193472	0.109319	0.0065612	0.292214	0.073373
UID1189	MAST4..375449./782	782	782-KSAGNIPLSPLARTPSPTPQPTSPQRSPSPL	375449	MAST4	0.505564	0.0235369	-0.304646	NA	-0.862473	0.116418	0.174338	-0.0833645	0.0510492	0.184512	-0.253773	0.266742	0.296456	NA	0.5009	0.443733	0.0858108	0.658555	-0.213955	1.28704	NA	NA	0.206313	NA	0.262762	-0.252225	0.253531	NA	22		MAST4..375449.	0.0240141	0.072131	0.0197067	0.0953183	0.0261436	0.0523651	0.0249271	0.074883	0.0193472	0.109319	0.0065612	0.292214	0.073373
UID1191	MAST4..375449./783	783	783-RVDSGTEKPGLVAPESPVRKSPSEYKLEGRS	375449	MAST4	-0.106877	-0.678911	-0.753279	-0.858225	-1.44902	-1.41485	-1.11365	-1.08769	-1.04005	-0.62695	-1.3796	-0.823329	-0.643353	-1.43396	0.107245	0.277793	-1.06992	-0.180798	-0.729635	1.81883	NA	-0.700781	-0.378812	-0.342384	-0.188787	-0.601953	-0.325985	-1.17803	27		MAST4..375449.	0.0240141	0.072131	0.0197067	0.0953183	0.0261436	0.0523651	0.0249271	0.074883	0.0193472	0.109319	0.0065612	0.292214	0.073373
UID1192	MAST4..375449./784	784	784-RQFSSCSHRFSKVFSSIDRITQNSAEEKEDS	375449	MAST4	NA	-0.980571	-0.689336	-0.828085	-1.31469	-1.22999	NA	NA	-0.624745	-0.902276	-0.883677	0.000921249	NA	NA	1.36767	-0.62788	-0.980547	0.168718	-0.658878	-0.230708	NA	0.175915	0.132205	-1.27087	-0.0241833	-0.550848	NA	-1.17265	21		MAST4..375449.	0.0240141	0.072131	0.0197067	0.0953183	0.0261436	0.0523651	0.0249271	0.074883	0.0193472	0.109319	0.0065612	0.292214	0.073373
UID1194	SEC16A..9919./785	785	785-WDRADSGPTQPPLSLSPAPETKRPGQAAKKE	9919	SEC16A	0.0225654	-0.344076	0.00985209	-0.299434	-0.233922	-0.260875	0.276075	-0.065732	0.152243	0.629482	-0.474083	-0.246794	-0.113079	-0.259434	0.163187	-0.287	-0.773283	-0.0174664	-0.313921	0.572953	-0.193544	0.517595	-0.547991	0.288401	-0.477383	-0.220588	-0.296262	0.230106	28		SEC16A..9919.	0.638243	0.52244	0.696181	0.942525	0.945487	0.786073	0.595448	0.664586	0.624361	0.3975	0.904698	0.348414	0.529929
UID1195	SEC16A..9919./786	786	786-LERAQQELVPPQQQASPPQLPKAMFSELSNP	9919	SEC16A	-0.305942	0.170041	-0.69925	0.0380826	-0.306684	0.0366495	0.344848	-0.0945698	0.0330736	-0.185369	-0.0164603	-0.374989	0.251805	0.00333023	0.526979	-0.470348	-0.430096	-0.512204	-0.0910991	0.449921	-0.0965265	0.335289	-0.217789	-0.0437285	-0.0718822	0.197418	0.0811865	0.113765	28		SEC16A..9919.	0.638243	0.52244	0.696181	0.942525	0.945487	0.786073	0.595448	0.664586	0.624361	0.3975	0.904698	0.348414	0.529929
UID1196	SEC16A..9919./787	787	787-QNYRYPEPERPSSRASHSSERPPPRQGYPEG	9919	SEC16A	1.00613	2.97983	0.874602	0.684254	0.801271	NA	0.733528	1.73903	NA	0.862793	1.62335	0.319125	1.50782	1.95538	1.08307	0.272161	0.569079	1.45908	-0.142774	2.56652	1.3264	0.364347	0.68765	1.16943	0.041029	1.29072	1.54272	NA	25		SEC16A..9919.	0.638243	0.52244	0.696181	0.942525	0.945487	0.786073	0.595448	0.664586	0.624361	0.3975	0.904698	0.348414	0.529929
UID1199	SEC16A..9919./789	789	789-EKRDNNWRYDPRFTGSFDDDPDPHRDPYGEE	9919	SEC16A	0.23201	0.590694	-0.0242081	0.233274	-0.128795	0.131948	-0.29968	0.511935	-0.0102232	-0.542435	0.284287	0.262309	0.99459	0.526391	1.49098	-0.458534	-0.388573	-0.187995	-0.142995	0.266315	0.187701	1.21324	0.504754	0.202382	0.126225	0.600487	1.09944	0.393266	28		SEC16A..9919.	0.638243	0.52244	0.696181	0.942525	0.945487	0.786073	0.595448	0.664586	0.624361	0.3975	0.904698	0.348414	0.529929
UID1200	SEC16A..9919./790	790	790-HRPASALVNPLARGDSPENRTHHPLGAGAGS	9919	SEC16A	-0.301185	0.543514	0.502507	0.628448	-0.186588	0.358745	-0.344537	0.1025	-0.54189	0.129998	-0.459667	-0.472403	0.0925589	0.314632	0.680297	-0.270533	-1.03711	-0.285958	-0.301796	0.199185	0.441502	1.23101	0.108802	0.605282	-0.354134	0.417583	0.375237	-0.18938	28		SEC16A..9919.	0.638243	0.52244	0.696181	0.942525	0.945487	0.786073	0.595448	0.664586	0.624361	0.3975	0.904698	0.348414	0.529929
UID1203	SEC16A..9919./792	792	792-VSQNYRGSVSQPSTPSPPKPTGIFQTSANSS	9919	SEC16A	0.196727	0.0567093	0.581361	-0.439728	-0.121634	NA	-0.204849	0.0297403	NA	1.07062	NA	0.311878	0.310589	0.27075	NA	NA	NA	NA	NA	0.609579	0.650006	0.510961	NA	0.217691	-0.264255	NA	0.464492	NA	17		SEC16A..9919.	0.638243	0.52244	0.696181	0.942525	0.945487	0.786073	0.595448	0.664586	0.624361	0.3975	0.904698	0.348414	0.529929
UID1207	SEC16A..9919./793	793	793-ESTFRQNPRIVNHWASPELRQNPGVKNEHRP	9919	SEC16A	-0.200471	-0.243766	-0.286792	-0.3426	-0.464975	0.10593	-0.177306	0.112701	0.0898105	-0.648445	-0.299589	0.0296208	0.0610933	0.128625	-0.158844	-0.190265	-0.429135	0.135071	0.0740601	0.45975	-0.61018	0.199556	-0.334193	-0.131337	-0.26569	0.0711692	-0.635891	0.399303	28		SEC16A..9919.	0.638243	0.52244	0.696181	0.942525	0.945487	0.786073	0.595448	0.664586	0.624361	0.3975	0.904698	0.348414	0.529929
UID1208	SEC16A..9919./794	794	794-LLPSAPQTLPDGPLASPARVPMFPVPLPPGP	9919	SEC16A	0.0894777	-0.0908058	-0.283738	-0.249376	-0.949987	-0.397156	0.230216	0.137471	-0.219073	0.523202	-0.339837	-0.140799	-0.413108	-0.293785	-0.622715	-0.127137	-0.237646	-0.25037	-0.134417	0.60101	-0.396884	0.0679172	-0.353211	0.0727266	-0.684831	0.0925382	-0.314708	-0.296118	28		SEC16A..9919.	0.638243	0.52244	0.696181	0.942525	0.945487	0.786073	0.595448	0.664586	0.624361	0.3975	0.904698	0.348414	0.529929
UID1209	SEC16A..9919./795	795	795-DSVSSSYSSRSHGRLSGSARPQELVGTFIQQ	9919	SEC16A	0.370471	-0.0971093	-0.509756	-0.543488	-0.946924	0.335622	NA	0.217755	0.308787	0.30616	-0.197857	0.259499	0.0557737	-0.030138	0.0838313	0.45222	0.327054	0.587802	0.616184	0.567565	0.448562	0.658266	-0.707375	-0.609167	-0.537531	0.525221	-0.843656	0.583224	27		SEC16A..9919.	0.638243	0.52244	0.696181	0.942525	0.945487	0.786073	0.595448	0.664586	0.624361	0.3975	0.904698	0.348414	0.529929
UID1210	SEC16A..9919./796	796	796-VSSSYSSRSHGRLSGSARPQELVGTFIQQEV	9919	SEC16A	NA	NA	NA	-0.306406	-0.165122	0.36734	NA	0.199599	0.43459	0.331141	NA	0.56665	0.0862646	0.0854721	0.278791	0.522064	NA	0.199884	NA	0.249701	NA	1.16038	NA	-0.601189	-0.339764	0.240164	NA	0.767543	18		SEC16A..9919.	0.638243	0.52244	0.696181	0.942525	0.945487	0.786073	0.595448	0.664586	0.624361	0.3975	0.904698	0.348414	0.529929
UID1214	SEC16A..9919./798	798	798-PEDEASGSFFKQIDSSPVGGETDETTVSQNY	9919	SEC16A	-0.2257	0.0175347	0.120195	-0.0369093	-0.213703	0.00343752	0.146591	0.0202284	-0.12888	-0.338558	-0.389795	0.524868	-0.115083	0.126352	-0.104538	0.083409	-0.0165362	0.169948	-0.173617	0.108644	-0.1659	0.442991	-0.0825947	-0.155429	-0.172646	0.0426598	0.00263929	0.152023	28		SEC16A..9919.	0.638243	0.52244	0.696181	0.942525	0.945487	0.786073	0.595448	0.664586	0.624361	0.3975	0.904698	0.348414	0.529929
UID1215	SEC16A..9919./799	799	799-HNVAAGSYEAPLPPGSFHGDFAYGTYRSNFS	9919	SEC16A	-0.349263	-0.163013	0.109612	0.122719	-0.0960515	-0.00577497	NA	-0.203293	0.234716	0.162332	0.0751743	-0.145907	0.132472	0.0342155	0.373517	-0.0319471	0.0632963	0.0991843	0.0733471	0.322688	-0.0781112	0.0228004	-0.0489249	0.277997	0.0754852	0.0811591	-0.0663505	-0.00406837	27		SEC16A..9919.	0.638243	0.52244	0.696181	0.942525	0.945487	0.786073	0.595448	0.664586	0.624361	0.3975	0.904698	0.348414	0.529929
UID1216	SEC16A..9919./800	800	800-EEVDRRSVHSEHSARSLHSAHSLASRRSSLS	9919	SEC16A	0.0414643	0.298103	1.76017	NA	0.0869026	NA	0.641793	NA	NA	0.197432	0.35587	-0.0291967	NA	0.598882	1.23121	-1.06841	-0.135911	NA	-0.0493498	0.812211	1.20195	1.29837	0.986513	NA	0.0559978	0.17957	0.637077	NA	20		SEC16A..9919.	0.638243	0.52244	0.696181	0.942525	0.945487	0.786073	0.595448	0.664586	0.624361	0.3975	0.904698	0.348414	0.529929
UID1217	SEC16A..9919./801	801	801-DRRSVHSEHSARSLHSAHSLASRRSSLSSHS	9919	SEC16A	-0.517641	-0.118191	1.58601	-0.133205	-0.522132	-0.188911	0.530216	0.124194	0.298599	-0.58256	-0.218138	-0.333549	0.527034	0.0755685	1.03706	-1.42272	-0.971969	0.389201	-0.384553	0.70193	0.771646	1.26451	0.185212	0.219682	-0.514727	0.201114	0.249675	0.215046	28		SEC16A..9919.	0.638243	0.52244	0.696181	0.942525	0.945487	0.786073	0.595448	0.664586	0.624361	0.3975	0.904698	0.348414	0.529929
UID1223	SEC16A..9919./802	802	802-DTVWPAMEQVSSRPTSPEKFSVPHVCARFGP	9919	SEC16A	0.0898135	0.291665	0.985257	-0.104059	-0.103751	0.056195	0.858848	0.184455	0.244141	0.0312142	0.182085	-0.0507116	0.974237	0.507811	1.34934	-0.839168	-0.28455	0.148479	0.00360489	0.698087	1.30141	1.33344	0.33057	0.794296	-0.323316	0.94259	0.91076	0.405785	28		SEC16A..9919.	0.638243	0.52244	0.696181	0.942525	0.945487	0.786073	0.595448	0.664586	0.624361	0.3975	0.904698	0.348414	0.529929
UID1224	SEC16A..9919./803	803	803-VPPLQERRHLLQEARSPDPGIVPQEAPVGNS	9919	SEC16A	-0.100202	-0.450082	-0.729069	-0.380501	-0.726291	0.0957758	-0.239146	-0.135699	0.0338966	1.54616	-0.546675	-0.205361	-0.000754038	-0.226577	-0.499933	-0.520997	-0.772335	-0.28181	-0.351164	0.969262	-0.593749	0.503296	-0.809858	0.148117	-0.344999	-0.161654	-0.738948	0.153365	28		SEC16A..9919.	0.638243	0.52244	0.696181	0.942525	0.945487	0.786073	0.595448	0.664586	0.624361	0.3975	0.904698	0.348414	0.529929
UID1228	SEC16A..9919./805	805	805-NPEPAPEPKVLSSAASLPGSELPSSRPEGSQ	9919	SEC16A	0.111538	0.0927024	NA	-0.0836949	NA	NA	0.0844998	-0.0208635	NA	NA	-0.132129	0.590801	-0.0342593	-0.0534039	-0.130363	0.698952	-0.135368	NA	0.320946	0.412485	0.157671	NA	-0.0969601	-0.0177479	0.0929232	0.471517	0.338717	NA	20		SEC16A..9919.	0.638243	0.52244	0.696181	0.942525	0.945487	0.786073	0.595448	0.664586	0.624361	0.3975	0.904698	0.348414	0.529929
UID1229	SEC16A..9919./806	806	806-ASLPGSELPSSRPEGSQGGELSRCSSMSSLS	9919	SEC16A	0.886933	-0.07057	0.156547	0.135536	0.309849	-0.514993	NA	NA	0.524302	0.454924	0.57889	0.659851	NA	-0.306104	0.49234	0.602385	0.24203	1.27028	0.418177	-0.0326395	-0.489568	0.573334	0.873784	0.168369	0.0616474	0.0620761	-0.14753	0.299098	25		SEC16A..9919.	0.638243	0.52244	0.696181	0.942525	0.945487	0.786073	0.595448	0.664586	0.624361	0.3975	0.904698	0.348414	0.529929
UID1230	SEC16A..9919./807	807	807-ELPSSRPEGSQGGELSRCSSMSSLSREVSQH	9919	SEC16A	NA	0.188025	0.142054	-0.265677	0.606336	-0.128782	NA	-0.558857	-0.491989	0.342174	-0.0398169	1.98141	-0.541123	-0.502874	-0.168791	1.52582	-0.213927	2.24275	-0.126478	0.04076	NA	0.684594	0.18962	-0.680739	-0.438664	-0.396405	NA	0.670996	24		SEC16A..9919.	0.638243	0.52244	0.696181	0.942525	0.945487	0.786073	0.595448	0.664586	0.624361	0.3975	0.904698	0.348414	0.529929
UID1231	SEC16A..9919./808	808	808-SAYAQNYRYPEPERPSSRASHSSERPPPRQG	9919	SEC16A	-0.604556	0.712402	0.15379	-0.466224	-0.547849	0.315705	0.0784178	0.420221	-0.181446	0.283405	-0.0737411	0.177072	0.61794	0.052557	0.459367	0.0145569	-0.417264	0.486056	-0.222355	0.79383	-0.102168	0.29135	-0.550486	-0.0718288	-0.299152	0.0897738	-0.715352	0.546357	28		SEC16A..9919.	0.638243	0.52244	0.696181	0.942525	0.945487	0.786073	0.595448	0.664586	0.624361	0.3975	0.904698	0.348414	0.529929
UID1232	SEC16A..9919./809	809	809-AYAQNYRYPEPERPSSRASHSSERPPPRQGY	9919	SEC16A	-0.504149	0.531626	0.422915	-0.280065	-0.404023	0.258298	0.110574	0.46565	-0.151628	0.213402	-0.0769302	0.183581	0.606816	0.187866	0.374394	-0.0925852	-0.460214	0.377422	-0.207095	0.766507	0.249449	0.425615	-0.387386	-0.0232576	-0.374993	0.0584965	-0.52855	0.532195	28		SEC16A..9919.	0.638243	0.52244	0.696181	0.942525	0.945487	0.786073	0.595448	0.664586	0.624361	0.3975	0.904698	0.348414	0.529929
UID1234	RIMBP2..23504./810	810	810-PVTVPSIDDYGRDRLSPDFYEESETDPGAEE	23504	RIMBP2	0.124663	-0.117198	NA	NA	NA	NA	0.039649	NA	NA	NA	0.471635	-0.295854	NA	NA	1.4156	-0.0723457	1.22206	NA	0.305134	0.0273471	NA	NA	0.243325	NA	1.09526	-0.13306	0.183736	NA	14		RIMBP2..23504.	0.0107054	0.0589535	0.0127296	0.0744854	0.00919705	0.0205951	0.000524281	0.0266818	0.0363769	0.0381684	0.0062351	0.0149357	0.0369664
UID1235	KHNYN..23351./811	811	811-PGEEAWEREVALRPQSVGGGARESAPLKGKA	23351	KHNYN	NA	0.0557461	0.483261	0.535155	-0.170372	0.204077	NA	0.425179	0.298364	0.626467	0.379837	NA	0.484945	-0.00374699	0.230369	0.901661	0.219491	0.189317	-0.145189	NA	NA	NA	0.322722	0.119075	NA	0.152849	NA	0.29183	20		KHNYN..23351.	0.0475338	0.0699492	0.0194517	0.0610671	0.0417792	0.0446301	0.0627118	0.0411493	0.0105906	0.0608092	0.0118232	0.0141672	0.0814892
UID1236	KHNYN..23351./812	812	812-______MPTWGARPASPDRFAVSAEAENKVR	23351	KHNYN	0.264816	0.384298	1.92491	0.321599	0.8228	-0.227903	-0.113748	-0.190032	-0.168934	-0.106654	1.29439	-0.773184	0.43748	0.0603959	1.04536	-0.345343	0.246305	-0.818828	-0.372216	0.223599	0.780375	0.33882	0.258701	0.31277	0.116306	0.221101	0.659797	-0.484157	28		KHNYN..23351.	0.0475338	0.0699492	0.0194517	0.0610671	0.0417792	0.0446301	0.0627118	0.0411493	0.0105906	0.0608092	0.0118232	0.0141672	0.0814892
UID1237	KHNYN..23351./813	813	813-LQRLHNGNASPPRVPSPPPAPEPPWHCGDRG	23351	KHNYN	NA	-0.103786	-0.145788	0.0628166	-0.16907	-0.0955145	-0.0270023	-0.159545	0.0182819	0.591766	-0.0351102	0.0687504	0.0597367	NA	-0.208311	0.0171657	0.0946448	-0.232452	-0.0104842	0.188899	NA	0.360605	-0.0910923	0.318758	-0.243013	-0.20026	NA	0.0559301	24		KHNYN..23351.	0.0475338	0.0699492	0.0194517	0.0610671	0.0417792	0.0446301	0.0627118	0.0411493	0.0105906	0.0608092	0.0118232	0.0141672	0.0814892
UID1243	U2SURP..23350./815	815	815-KHNYRNESARESLCDSPHQNLSRPLLENKLK	23350	U2SURP	-0.208945	0.468801	0.714164	-0.216792	0.259216	0.32266	-0.36097	-0.16079	0.0840468	0.59994	-0.407685	0.919814	0.0946442	0.292028	-0.653615	-0.22623	0.596184	0.159118	0.00714588	-0.312852	0.237097	-0.413478	-0.169902	-0.213053	-0.297215	-0.407031	0.123572	-0.0106119	28		U2SURP..23350.	0.995774	1	0.999999	0.976604	0.996792	0.999372	0.972479	0.999721	0.937681	0.993677	1	0.983134	0.99558
UID1245	U2SURP..23350./817	817	817-TKKPPLKKGEKEKKKSNLELFKEELKQIQEE	23350	U2SURP	0.24128	-0.133116	0.262875	-0.11114	0.473703	0.28095	0.0539455	-0.00122166	0.685575	-0.162081	-0.487898	2.03464	-0.258741	-0.116085	-0.334432	1.56268	0.10156	0.947948	-0.381725	-0.108653	0.53513	0.630043	-0.368907	-0.380425	2.33867	-0.447968	-0.337855	0.865839	28		U2SURP..23350.	0.995774	1	0.999999	0.976604	0.996792	0.999372	0.972479	0.999721	0.937681	0.993677	1	0.983134	0.99558
UID1246	U2SURP..23350./818	818	818-HVYYRWKLYSILQGDSPTKWRTEDFRMFKNG	23350	U2SURP	-0.02798	-0.659631	-0.731539	-0.0984581	-0.521814	0.150376	-0.786571	-0.151281	-0.348343	-0.476682	-0.772934	0.00607332	-0.834055	-0.733099	-0.769676	-0.33407	-0.555472	0.128654	0.432831	-0.379595	-1.21715	-0.382773	-0.769366	-0.575046	-0.166069	0.227669	-0.752143	0.358054	28		U2SURP..23350.	0.995774	1	0.999999	0.976604	0.996792	0.999372	0.972479	0.999721	0.937681	0.993677	1	0.983134	0.99558
UID1247	U2SURP..23350./819	819	819-PSPSRSSSGRRVKSPSPKSERSERSERSHKE	23350	U2SURP	NA	0.393795	0.372861	NA	-0.00952911	0.391742	-0.0572987	-0.141706	-0.129142	1.48964	0.678489	NA	1.83187	NA	0.541144	-0.276772	1.06558	-0.292048	0.132722	NA	NA	NA	1.10596	NA	NA	0.278561	NA	NA	17		U2SURP..23350.	0.995774	1	0.999999	0.976604	0.996792	0.999372	0.972479	0.999721	0.937681	0.993677	1	0.983134	0.99558
UID1249	SETD1A..9739./820	820	820-PSPEREEVRTSPRPASPARSGSPAPETTNES	9739	SETD1A	-0.270751	0.236011	0.0802266	0.40918	0.144099	-0.125296	-0.411157	-0.821934	-0.231507	1.10893	-0.0652668	-0.570056	0.386754	-0.350786	-0.222758	-0.476476	0.857998	-0.361648	-0.260322	-0.0938098	0.297377	-0.807784	-0.0611599	0.68177	-0.291835	0.152247	-0.734229	-0.381833	28		SETD1A..9739.	0.910868	0.972891	0.932079	0.963597	0.947274	0.977407	0.932246	0.936636	0.925692	0.960401	0.935075	0.618537	0.955671
UID1250	SETD1A..9739./821	821	821-EMLLKEQRSKFSFLASDTEEEEENSSMVLGA	9739	SETD1A	-0.277853	0.0458722	-0.0863349	-0.0163372	-0.0623897	-0.15039	-0.024539	-0.0529846	-0.00477997	0.024213	-0.0899599	-0.298958	-0.0822589	-0.155233	-0.209856	-0.239026	0.100007	-0.0533125	-0.0646569	-0.0224153	-0.100664	-0.12022	-0.216385	0.18766	-0.117577	0.195094	-0.14392	-0.176988	28		SETD1A..9739.	0.910868	0.972891	0.932079	0.963597	0.947274	0.977407	0.932246	0.936636	0.925692	0.960401	0.935075	0.618537	0.955671
UID1252	SETD1A..9739./822	822	822-PAGPPAPAPRPDERPSSPIPLLPPPKKRRKT	9739	SETD1A	-0.619565	-1.04457	0.487329	-0.28572	0.311891	0.0313579	-0.646988	-0.214724	-0.202654	0.497432	0.0780244	0.505494	-0.364338	-0.200694	-0.136586	0.0653105	-0.194409	0.162656	-0.0176042	-0.141892	NA	-0.122715	-0.238134	-0.277134	-0.607845	0.255909	-1.24563	-0.0951564	27		SETD1A..9739.	0.910868	0.972891	0.932079	0.963597	0.947274	0.977407	0.932246	0.936636	0.925692	0.960401	0.935075	0.618537	0.955671
UID1253	SETD1A..9739./823	823	823-AGPPAPAPRPDERPSSPIPLLPPPKKRRKTV	9739	SETD1A	0.151284	-0.182518	-0.444429	0.199693	-0.00668001	-0.201727	-0.115599	-0.349094	-0.591072	0.184732	0.117216	0.699453	-0.309235	-0.496794	0.192266	0.249195	-0.235868	-0.0220879	-0.142063	0.554359	-0.307301	-0.723011	0.207039	0.226722	0.259595	0.512287	-0.38592	-0.232645	28		SETD1A..9739.	0.910868	0.972891	0.932079	0.963597	0.947274	0.977407	0.932246	0.936636	0.925692	0.960401	0.935075	0.618537	0.955671
UID1254	SETD1A..9739./824	824	824-PSEISEASEEKRPRPSTPAEEDEDDPEQEKE	9739	SETD1A	-0.619936	-0.0625479	-0.110329	0.0776699	-0.11765	0.144804	-0.436939	-0.672357	-0.143112	-0.411682	-0.176801	-0.708641	-0.363921	-0.775733	-0.0189533	-0.69319	-0.0485533	-0.75805	-0.469668	-0.354414	-1.09274	-0.647261	-0.0703451	0.0460428	-0.156905	0.360042	-0.184096	-0.712604	28		SETD1A..9739.	0.910868	0.972891	0.932079	0.963597	0.947274	0.977407	0.932246	0.936636	0.925692	0.960401	0.935075	0.618537	0.955671
UID1259	SETD1A..9739./827	827	827-EVRTSPRPASPARSGSPAPETTNESVPFAQH	9739	SETD1A	-0.0294676	-0.0221765	-0.10646	0.0554724	0.0925665	0.170358	0.382299	-0.13911	0.150872	-0.1776	0.0937781	-0.00293541	0.430535	NA	-0.131879	-0.302765	-0.0326247	-0.173089	-0.145674	-0.0476987	NA	-0.063839	0.0292347	0.0589857	0.0391712	-0.0206807	-0.0598917	0.178258	26		SETD1A..9739.	0.910868	0.972891	0.932079	0.963597	0.947274	0.977407	0.932246	0.936636	0.925692	0.960401	0.935075	0.618537	0.955671
UID1260	SETD1A..9739./828	828	828-TPAPVEVPVPERVAGSPVTPLPEQEASPARP	9739	SETD1A	-0.410581	0.371653	0.0063777	0.260591	0.446371	-0.423717	-0.300654	-0.318756	-0.637535	-0.270141	0.200187	0.152248	0.0816126	-0.0695276	0.177539	-0.0836849	-0.527004	-0.310185	-0.629817	-0.167042	-0.0767612	NA	0.0905211	0.102526	-0.299052	0.0154648	-0.315486	0.230555	27		SETD1A..9739.	0.910868	0.972891	0.932079	0.963597	0.947274	0.977407	0.932246	0.936636	0.925692	0.960401	0.935075	0.618537	0.955671
UID1261	PER2..8864./829	829	829-CPATRATPPSAMGRASPPLFQSRSSSPLQLN	8864	PER2	-0.441496	0.392734	0.971134	0.659404	0.0901121	0.0303349	0.295722	0.138101	1.23211	-0.842799	0.639242	-1.06099	0.370318	0.288626	1.17388	0.091006	0.873233	-0.0758084	0.1201	0.37749	1.03593	0.54297	0.296637	-0.177488	-0.0565567	0.0793228	0.958807	0.0965856	28		PER2..8864.	0.0507439	0.385892	0.0443041	0.11182	0.0480454	0.0343041	0.0301579	0.187379	0.188124	0.0785472	0.0500669	0.0776479	0.0705885
UID1262	PER2..8864./830	830	830-NVPALRSSDKRKATVSPGPHAGEAEPPSRVN	8864	PER2	0.0711246	0.27117	1.10573	NA	0.151781	-0.355072	0.125249	-0.1457	1.41547	-0.190608	0.663702	-0.116987	1.07128	0.450279	0.519066	-0.113806	0.632296	-0.159048	0.0731564	0.0613952	0.662378	0.172784	0.473694	NA	0.185403	-0.0960464	0.714976	NA	25		PER2..8864.	0.0507439	0.385892	0.0443041	0.11182	0.0480454	0.0343041	0.0301579	0.187379	0.188124	0.0785472	0.0500669	0.0776479	0.0705885
UID1264	PER2..8864./831	831	831-GKELGMLVEPPDARQSPDTFSLMMAKSEHNP	8864	PER2	-0.183607	0.259094	0.808111	0.349067	0.12179	0.812696	0.0726585	-0.162847	-0.449329	-0.575852	NA	-0.370758	-0.198383	0.46537	NA	NA	NA	-0.561499	NA	-0.0517426	0.614453	0.317702	NA	-0.132315	-0.0177584	NA	0.450861	0.199631	21		PER2..8864.	0.0507439	0.385892	0.0443041	0.11182	0.0480454	0.0343041	0.0301579	0.187379	0.188124	0.0785472	0.0500669	0.0776479	0.0705885
UID1265	SYNJ2..8871./832	832	832-AEAAIRCLLEARGGASEEALSAVAPRDLEAS	8871	SYNJ2	0.0277464	0.0394373	0.243688	-0.086637	-0.199826	-0.0957847	-0.291764	-0.150052	-0.25958	0.0406475	-0.201058	0.116483	-0.432771	-0.0614452	NA	NA	0.42873	-0.203371	0.0684624	0.150753	0.874085	0.0201983	-0.0962267	0.295458	0.198211	NA	-0.00351548	NA	24		SYNJ2..8871.	0.00176	0.000561	0.00373	0.00475	0.00387	0.00895	0.0346	0.0152	0.00387	0.000919	0.051	0.0317	0.00361
UID1268	ZBTB5..9925./833	833	833-VEVEGVVVSAEKIDLSPESSDRSFSDPQSST	9925	ZBTB5	-0.257001	0.0223987	0.414215	0.310588	0.105743	0.0321002	0.420006	-0.108288	0.526275	-0.0274844	0.519966	-0.233006	0.416281	0.152441	0.906828	-0.424607	0.381335	0.0672245	-0.0677964	-0.122059	0.640228	NA	0.243117	0.22607	0.227385	0.180971	0.239726	NA	26		ZBTB5..9925.	0.145278	0.0226394	0.0174499	0.0984304	0.0375455	0.0376512	0.0835348	0.00721879	0.0211891	0.0457568	0.0203827	0.0581386	0.0268363
UID1270	GARRE1..9710./834	834	834-HTPLTPQPGLAPQQQSPKQQQPQVQYYQHLL	9710	GARRE1	0.00344674	-0.326939	-0.802813	-0.160314	-0.209575	-0.443468	-0.850045	-0.196095	-0.553242	-0.27061	-0.320045	0.584479	-0.75449	-0.706228	-0.379017	1.13519	-0.472124	-0.329824	-0.809373	0.0751344	-0.851332	-0.707988	-0.371432	-0.442303	-0.446446	-0.19707	-0.219662	-0.489432	28		GARRE1..9710.	0.0198466	0.0381208	0.0125469	0.0703285	0.0244231	0.0167084	0.0543106	0.3239	0.00546262	0.0199372	0.0491854	0.123794	0.0186178
UID1273	PFAS..5198./836	836	836-IWGAEYQESNALLLRSPNRDFLTHVSARERC	5198	PFAS	-0.772487	NA	NA	-0.413954	NA	0.0360374	-0.352306	-0.616178	-0.533261	-0.493899	NA	-1.63851	-0.30576	-0.356711	NA	NA	NA	-0.497256	NA	-0.318678	-0.401766	NA	NA	-0.784953	0.100303	NA	-0.624988	-0.216628	17		PFAS..5198.	0.573929	0.409516	0.997399	0.545794	0.681558	0.963738	0.936031	0.813463	0.70798	0.160119	0.440302	0.356453	0.768332
UID1277	MCF2L..23263./837	837	837-LEQSQSLPLPAPTSTSPSRGNSRNIKKLEER	23263	MCF2L	-0.26078	0.0750577	0.567106	0.581857	-0.0610619	-0.263683	-0.489412	0.0337067	0.120337	0.373226	-0.0319221	0.019426	0.432428	0.186726	0.9149	-1.32979	-0.206566	-0.155582	0.0298123	-0.259229	0.00255044	-0.0575514	0.5549	0.346729	0.751831	-0.354465	-0.0186582	-0.630313	28		MCF2L..23263.	0.0454253	0.0403614	0.100701	0.0552616	0.0531127	0.01519	0.0501034	0.0125127	0.121804	0.0214197	0.0463343	0.106572	0.0133263
UID1278	MCF2L..23263./838	838	838-RRAKSEMSESRQGRGSAGEEEESLAILRRHV	23263	MCF2L	-0.0128385	-0.135475	0.697394	-0.324008	0.120866	-0.295083	-0.848593	0.0540167	-0.115754	0.401536	-0.377154	0.228374	0.0645062	-0.205	1.06968	-0.555617	-0.366217	-0.684337	-0.227166	0.208896	0.0408014	0.202408	0.0648017	0.286893	0.274208	-0.388883	-0.225675	-0.0774778	28		MCF2L..23263.	0.0454253	0.0403614	0.100701	0.0552616	0.0531127	0.01519	0.0501034	0.0125127	0.121804	0.0214197	0.0463343	0.106572	0.0133263
UID1279	MCF2L..23263./839	839	839-ALAKSPCPSPGIRRGSENSSSEGGALRRGPY	23263	MCF2L	1.86484	-0.160037	1.39665	0.179422	0.710701	-0.636576	-0.348674	0.515321	1.03615	1.32989	0.0798297	-0.394005	0.908026	0.139496	1.46968	-0.846702	1.83673	-0.35442	0.293471	0.867314	2.1385	0.309769	0.813499	0.728682	-0.208651	0.360897	0.522657	-0.662832	28		MCF2L..23263.	0.0454253	0.0403614	0.100701	0.0552616	0.0531127	0.01519	0.0501034	0.0125127	0.121804	0.0214197	0.0463343	0.106572	0.0133263
UID1284	DCLK1..9201./842	842	842-RRSTTKSPGPSRRSKSPASTSSVNGTPGSQL	9201	DCLK1	0.299346	0.10689	0.0457621	NA	0.214983	NA	0.311293	0.134341	NA	-0.141276	0.13873	0.207944	-0.0230823	0.341733	0.479893	2.79399	-0.0354309	NA	-0.0425234	0.273633	-0.522948	0.0365119	0.692988	0.596961	-1.892	0.3978	0.0915011	NA	23		DCLK1..9201.	0.00467691	0.168536	0.0710825	0.0153398	0.04347	0.0226582	0.170243	0.037283	0.212897	0.0447758	0.00595306	0.0213864	0.108277
UID1289	DCLK1..9201./843	843	843-LSTPRSGKSPSPSPTSPGSLRKQRSSQHGGS	9201	DCLK1	-0.717742	-0.704945	-0.62985	-1.03504	-0.639233	-1.088	-0.513197	-0.533631	-1.32333	-1.19171	-1.03385	0.253965	-0.793832	-0.50857	-1.35517	0.493711	-0.745584	-0.275392	-0.399763	-1.04907	-0.677998	-1.36979	-0.880804	0.290384	-0.979609	-0.902893	-0.476007	-1.21109	28		DCLK1..9201.	0.00467691	0.168536	0.0710825	0.0153398	0.04347	0.0226582	0.170243	0.037283	0.212897	0.0447758	0.00595306	0.0213864	0.108277
UID1294	SNPH..9751./846	846	846-LPGSRRTSAGSRRRTSPPVSVRDAYGTSSLS	9751	SNPH	-0.442092	-0.532208	0.0934258	NA	0.818355	NA	-0.398459	NA	NA	0.521037	-0.347134	-0.0355749	NA	NA	-0.354325	1.58664	0.182163	-0.297544	-0.327763	-0.0220466	NA	NA	0.28471	NA	-0.381167	0.0176368	-0.255033	NA	18		SNPH..9751.	0.0168603	0.0760107	0.0151607	0.0208435	0.0218049	0.00942462	0.0108338	0.0166766	0.0289655	0.0121531	0.0252702	0.0407565	0.0145449
UID1295	ANKRD28..23243./847	847	847-TFNAINRYTNTSKTVSFEALPIMRNEPSSYC	23243	ANKRD28	0.0623082	0.488132	-0.495537	-0.122524	-0.191754	0.228413	-0.0105216	0.726892	-0.27899	-0.46363	-0.189035	0.384817	0.564123	-0.208436	0.0932449	-0.399583	-0.814461	-0.0739121	-0.154299	-0.448748	-0.223313	0.117276	-0.114858	-0.426035	-0.0135632	-0.297988	0.34442	-0.581874	28		ANKRD28..23243.	0.0466385	0.0366593	0.0195657	0.103504	0.0559779	0.0460848	0.0319068	0.0561158	0.11471	0.0118985	0.0261247	0.00704854	0.0321696
UID1299	ARHGEF11..9826./849	849	849-QGKHQVLLEDPEQEGSAEEEELGVLPCPSTS	9826	ARHGEF11	-0.125549	0.0744112	0.444795	0.410072	-0.0213523	0.0739477	0.167343	-0.181406	-0.103574	-0.164704	-0.350499	-0.499007	0.232586	0.0856285	0.0510225	-0.160263	-0.402963	-0.121048	0.0344229	0.285417	-0.234898	0.0992152	-0.0399628	-0.0750437	0.0775609	-0.0168471	0.322129	-0.172404	28		ARHGEF11..9826.	0.211686	0.0411716	0.0400311	0.100389	0.287446	0.147736	0.0062425	0.113838	0.0891192	0.0480145	0.106955	0.0274582	0.141374
UID1300	ARHGEF11..9826./850	850	850-DPSPAGAPRITSVIPSPPPPPPLPPPQRITG	9826	ARHGEF11	0.154843	0.0714059	0.0429815	0.232252	0.142765	-0.17416	-0.0627675	-0.103803	-0.013604	-0.202211	-0.106007	0.298417	-0.0798362	-0.0361357	0.0450635	0.242158	-0.409061	-0.11118	-0.248247	0.44295	0.388963	-0.138951	-0.227798	-0.0532932	0.0251203	0.116091	0.192832	0.0459903	28		ARHGEF11..9826.	0.211686	0.0411716	0.0400311	0.100389	0.287446	0.147736	0.0062425	0.113838	0.0891192	0.0480145	0.106955	0.0274582	0.141374
UID1301	ARHGEF11..9826./851	851	851-DAAAEATRLHQSASSSTSSLSTRSLENPTPP	9826	ARHGEF11	NA	0.557572	0.769219	0.411949	0.272278	0.0834892	-0.176921	-0.0616446	0.293437	0.475884	0.746154	0.0144176	0.733557	NA	0.973121	0.212502	0.428601	0.275504	0.0708747	-0.00955772	NA	0.439196	0.664409	0.435047	0.521632	0.352384	NA	0.192514	24		ARHGEF11..9826.	0.211686	0.0411716	0.0400311	0.100389	0.287446	0.147736	0.0062425	0.113838	0.0891192	0.0480145	0.106955	0.0274582	0.141374
UID1305	ARHGEF11..9826./854	854	854-MGLCSLEHLPPRTRNSGIWESPELDRNLAED	9826	ARHGEF11	0.00606553	-0.00321722	0.201628	0.158419	0.238174	0.06837	-0.0802978	-0.142221	0.252588	0.0995479	0.206991	0.140655	0.14323	-0.0804323	0.165662	0.020038	-0.220188	0.245905	-0.212916	0.214857	0.247738	-0.155667	0.107349	0.201166	-0.0748126	-0.0323512	0.102395	0.0742842	28		ARHGEF11..9826.	0.211686	0.0411716	0.0400311	0.100389	0.287446	0.147736	0.0062425	0.113838	0.0891192	0.0480145	0.106955	0.0274582	0.141374
UID1307	ARHGEF11..9826./855	855	855-SLMNRNSVLSDPGLDSPRTSPVIMARVAQHH	9826	ARHGEF11	-0.349788	NA	NA	-0.177715	0.384105	0.121727	-0.130857	0.219737	0.165132	NA	NA	0.255884	-0.438154	0.169952	0.248014	0.0653801	NA	NA	NA	-0.146783	-0.735019	0.315041	NA	0.166214	-0.0908341	0.220147	-1.33089	0.340932	20		ARHGEF11..9826.	0.211686	0.0411716	0.0400311	0.100389	0.287446	0.147736	0.0062425	0.113838	0.0891192	0.0480145	0.106955	0.0274582	0.141374
UID1308	ARHGEF11..9826./856	856	856-RNSVLSDPGLDSPRTSPVIMARVAQHHRRQG	9826	ARHGEF11	NA	0.0372391	0.18239	0.546455	0.458781	0.36458	NA	-0.0796919	0.277487	0.403145	0.682051	0.362579	-0.0359039	-0.113659	0.648861	-0.0515327	-0.00190258	0.465009	-0.0537643	0.372214	NA	0.127874	0.409911	1.15301	-0.067831	0.357513	NA	0.235659	24		ARHGEF11..9826.	0.211686	0.0411716	0.0400311	0.100389	0.287446	0.147736	0.0062425	0.113838	0.0891192	0.0480145	0.106955	0.0274582	0.141374
UID1309	ARHGEF11..9826./857	857	857-DSAPERKSPSHHRQPSDASETTGLVQRCVII	9826	ARHGEF11	0.537203	0.219308	NA	0.209766	NA	-0.164352	0.277229	0.139153	-0.235269	0.209141	0.423549	-0.0835657	0.115858	0.0162244	0.61153	-0.219387	0.126709	0.0618434	0.057375	0.274146	0.748923	NA	0.406106	0.303006	0.254613	-0.467055	0.377421	0.186687	25		ARHGEF11..9826.	0.211686	0.0411716	0.0400311	0.100389	0.287446	0.147736	0.0062425	0.113838	0.0891192	0.0480145	0.106955	0.0274582	0.141374
UID1310	ARHGEF11..9826./858	858	858-LHQSASSSTSSLSTRSLENPTPPFTPKMGRR	9826	ARHGEF11	NA	NA	1.23244	0.282076	0.141948	-0.00818427	1.43877	0.114469	0.601678	1.03305	0.217049	0.23844	0.915248	0.702135	0.285761	0.100945	0.242875	0.149872	0.684544	-0.248044	NA	0.186405	1.57407	0.0506248	-0.25996	0.00127697	NA	0.352829	24		ARHGEF11..9826.	0.211686	0.0411716	0.0400311	0.100389	0.287446	0.147736	0.0062425	0.113838	0.0891192	0.0480145	0.106955	0.0274582	0.141374
UID1311	ARHGEF11..9826./859	859	859-PQLQGGNDDPRRPSRSPPSLALRDVGMIFHT	9826	ARHGEF11	0.170646	0.559344	0.301982	-0.115769	-0.387297	-0.743171	-1.53081	-0.173026	0.409988	0.339301	0.382653	0.592057	0.390113	0.234322	0.566388	0.381927	-0.25893	0.716113	-0.423851	0.691934	0.00733376	-0.729334	0.0647372	0.754403	0.266258	-0.495935	-0.654018	-1.6841	28		ARHGEF11..9826.	0.211686	0.0411716	0.0400311	0.100389	0.287446	0.147736	0.0062425	0.113838	0.0891192	0.0480145	0.106955	0.0274582	0.141374
UID1313	ARHGEF11..9826./861	861	861-EMKRSRKAENVPRSRSDVDMDAAAEATRLHQ	9826	ARHGEF11	NA	-1.11919	0.379572	NA	-0.174006	0.11074	-0.0292015	0.216107	0.109633	0.178444	-0.105503	NA	0.130755	NA	0.537391	0.00310707	-0.127355	0.176276	-0.220784	NA	NA	NA	-0.114614	NA	NA	0.0363274	NA	NA	17		ARHGEF11..9826.	0.211686	0.0411716	0.0400311	0.100389	0.287446	0.147736	0.0062425	0.113838	0.0891192	0.0480145	0.106955	0.0274582	0.141374
UID1316	ARHGEF11..9826./862	862	862-GSFHTEAARWTDGSLSPPAKEPLASDSRNSH	9826	ARHGEF11	0.250664	-0.0506199	0.553982	0.194593	0.419479	-0.328923	0.0989332	0.0939302	0.309615	0.0469979	0.274779	0.235799	0.283928	0.0412483	0.841036	0.130075	0.0637269	0.36445	-0.0933803	0.391113	0.789733	-0.070665	0.318678	0.0763098	0.0696023	0.0416908	-0.345274	0.277959	28		ARHGEF11..9826.	0.211686	0.0411716	0.0400311	0.100389	0.287446	0.147736	0.0062425	0.113838	0.0891192	0.0480145	0.106955	0.0274582	0.141374
UID1319	TBX3..6926./863	863	863-FAAERPRDSGRLDKASPDSRHSPATISSSTR	6926	TBX3	-0.762266	NA	-1.64576	-0.557377	-1.71703	-0.153476	0.790442	-0.948561	-0.990324	-0.635794	-0.112025	-1.94242	0.787444	0.316124	-0.753979	1.4369	-1.07934	-0.731922	-1.11357	-1.94686	-0.746193	-1.01741	-0.23702	-0.982503	-2.26057	-0.364072	-0.115956	0.0485954	27		TBX3..6926.	0.186894	0.132505	0.191137	0.0756133	0.113909	0.193778	0.0549463	0.0873187	0.0449591	0.00961099	0.127932	0.230254	0.00145709
UID1322	TBX3..6926./864	864	864-RDSGRLDKASPDSRHSPATISSSTRGLGAEE	6926	TBX3	0.0917578	0.0801435	NA	NA	NA	NA	0.152777	NA	NA	NA	0.222507	-0.598432	NA	NA	0.00852871	1.51586	-0.352937	NA	-0.0833721	0.01162	NA	NA	0.383382	NA	-0.460305	-0.160484	-0.0180168	NA	14		TBX3..6926.	0.186894	0.132505	0.191137	0.0756133	0.113909	0.193778	0.0549463	0.0873187	0.0449591	0.00961099	0.127932	0.230254	0.00145709
UID1323	TBX3..6926./865	865	865-LNSRSSTLSSSSMSLSPKLCAEKEAATSELQ	6926	TBX3	-0.433945	-0.564455	-0.835194	-0.236349	-1.1415	-0.341156	0.310206	-0.311738	-0.422162	-0.610933	0.189709	-0.668734	0.555566	0.0475127	-0.258532	1.02803	-0.767524	-0.627705	-0.627572	-1.00637	-0.389712	-0.671093	-0.150916	-0.44268	-0.515785	-0.0928574	-0.0453776	0.0289885	28		TBX3..6926.	0.186894	0.132505	0.191137	0.0756133	0.113909	0.193778	0.0549463	0.0873187	0.0449591	0.00961099	0.127932	0.230254	0.00145709
UID1324	TBX3..6926./866	866	866-AAAGPLDGKVAALAASPASVAVDSGSELNSR	6926	TBX3	NA	-0.429135	-0.425618	-0.216891	-0.659288	0.213785	NA	-0.0736675	0.203487	-0.147388	-0.289474	NA	0.183417	-0.138956	-0.360032	0.199898	-0.172997	-0.216578	-0.374937	NA	NA	NA	-0.412175	-0.531487	NA	-0.15842	NA	0.291398	20		TBX3..6926.	0.186894	0.132505	0.191137	0.0756133	0.113909	0.193778	0.0549463	0.0873187	0.0449591	0.00961099	0.127932	0.230254	0.00145709
UID1328	KPNA5..3841./870	870	870-_____________MASPGKDNYRMKSYKNKA	3841	KPNA5	-0.0756599	0.111058	-0.318218	0.702254	0.169809	0.646621	0.000716209	-0.484794	-0.630219	-0.597812	-0.433309	-1.38121	-0.253755	-0.0385284	-0.683247	0.293205	0.0736496	-0.20574	-0.749875	0.277542	-0.507835	-0.754432	-0.260707	-0.0583973	0.0670554	-0.094944	-0.895675	-0.325747	28		KPNA5..3841.	0.00359268	0.00796844	0.154824	0.0394222	0.013489	0.0115628	0.00830429	0.0208752	0.0199006	0.00371939	0.12097	0.0038661	0.011152
UID1331	MDM4..4194./872	872	872-KENEGNDVPDCRRTISAPVVRPKDAYIKKEN	4194	MDM4	-0.776759	-0.5299	-0.026711	-0.375542	-0.347771	-0.627255	0.478412	-0.689376	0.0742102	0.363328	0.609121	0.380545	-0.227634	0.582348	0.0206676	-0.162987	0.172253	0.0764284	0.480057	0.492127	-0.316704	NA	-0.707425	0.334721	-0.839815	-0.844716	0.109585	NA	26		MDM4..4194.	0.285926	0.133776	0.0947006	0.517039	0.832006	0.225648	0.059561	0.0975663	0.0719614	0.156781	0.0723644	0.202385	0.858883
UID1333	BET1..10282./873	873	873-LTESLRSKVTAIKSLSIEIGHEVKTQNKLLA	10282	BET1	1.27819	-0.490537	-0.733095	-0.98502	-0.546399	0.0083197	-0.719824	0.916463	-0.738961	-0.83819	0.573427	0.743148	0.414768	-0.755266	0.24207	-0.997595	-0.657811	0.12216	-0.705223	-0.151789	-0.378564	-0.278134	-0.881122	-1.07862	0.539011	-0.729525	-0.504761	-0.773816	28		BET1..10282.	0.623238	0.15269	0.731379	0.270636	0.646695	0.825093	0.746235	0.71051	0.327459	0.142811	0.911191	0.483027	0.708508
UID1335	ZBTB7B..51043./874	874	874-AFATATASGVPNGEDSPPQVPLPPPPPPPPR	51043	ZBTB7B	-0.217582	-0.00302649	0.00894674	0.241675	-0.442763	-0.0394203	0.141932	0.0710014	0.211745	-0.175642	-0.0356231	0.129327	0.0968695	-0.0462551	0.0939293	-0.0663436	-0.194415	-0.172938	-0.0227839	0.0281752	-0.144039	0.195415	0.107169	-0.297833	-0.0407855	0.112411	0.283522	0.336102	28		ZBTB7B..51043.	0.296312	0.0207726	0.15483	0.0223585	0.0092425	0.115186	0.160005	0.122423	0.41351	0.0576941	0.672837	0.0311823	0.0183229
UID1337	TRIM24..8805./876	876	876-VRKDTNIDHGQPRPPSNRTVQSPNSSVPSPG	8805	TRIM24	-0.164639	-0.916979	-1.23198	0.737338	-1.29303	-0.206457	-1.83602	-1.06316	-1.68798	-1.82556	-2.20137	-2.25727	-1.51647	-0.745031	-1.71359	-0.324682	-0.972033	-1.99534	-0.56083	0.0906806	-2.17956	-1.38922	-1.33538	-0.583877	-0.787345	-2.09812	-1.91218	-1.11323	28		TRIM24..8805.	0.0231	0.0161	0.0206	0.0333	0.0152	0.0419	0.013	0.0491	0.0637	0.0111	0.00646	0.0279	0.00544
UID1338	TRIM24..8805./877	877	877-DSDDDFVQPRKKRLKSIEERQLLK_______	8805	TRIM24	1.79926	-0.42295	0.515775	-0.82678	-0.127172	-0.0399502	0.426027	0.0541538	0.851101	0.190305	0.90514	-0.477642	-0.0546045	0.287786	0.933273	-0.405972	1.71916	-0.134021	-0.189839	0.299072	1.71444	-0.430298	-0.479621	0.756334	0.237615	-1.00408	0.705549	-0.365469	28		TRIM24..8805.	0.0231	0.0161	0.0206	0.0333	0.0152	0.0419	0.013	0.0491	0.0637	0.0111	0.00646	0.0279	0.00544
UID1341	TRIM24..8805./878	878	878-PPENYDFPVVIVKQESDEESRPQNANYPRSI	8805	TRIM24	0.624783	-0.0871603	-0.54527	0.885415	0.0878369	0.443984	-0.638471	-0.122439	-0.29554	-1.39524	-0.194321	-0.0302343	-0.359619	-0.109861	-0.531913	0.0502977	-0.122087	-0.21463	-0.305622	0.0503875	-0.534328	-0.755565	-0.0633012	-0.139956	0.358847	-0.267319	-0.343066	-0.355288	28		TRIM24..8805.	0.0231	0.0161	0.0206	0.0333	0.0152	0.0419	0.013	0.0491	0.0637	0.0111	0.00646	0.0279	0.00544
UID1343	TRIM24..8805./879	879	879-NSSNGKSEWLDPSQKSPLHVGETRKEDDPNE	8805	TRIM24	0.464328	-0.128316	-0.620047	0.760269	-0.55062	0.227314	-0.284767	-0.0304708	-0.0148721	-0.890967	-0.340449	-0.0848182	-0.297637	0.463978	-0.174319	-0.292868	0.0720188	-0.394907	-0.172634	-0.0967126	0.0127729	-0.48199	0.123338	-0.0358315	0.402101	-0.419369	0.287429	-0.395452	28		TRIM24..8805.	0.0231	0.0161	0.0206	0.0333	0.0152	0.0419	0.013	0.0491	0.0637	0.0111	0.00646	0.0279	0.00544
UID1344	TRIM24..8805./880	880	880-ANYPRSILTSLLLNSSQSSTSEETVLRSDAP	8805	TRIM24	0.281438	0.143165	-0.00748348	-0.131367	-0.360308	-0.021811	0.155334	0.419097	-0.00657535	0.121829	-0.131581	0.221692	-0.156125	0.176253	-0.0653667	0.0897183	0.133849	-0.0318961	-0.0499659	0.254902	0.0369021	0.00559616	-0.262954	0.00900078	0.0971038	0.102023	0.165874	0.0344191	28		TRIM24..8805.	0.0231	0.0161	0.0206	0.0333	0.0152	0.0419	0.013	0.0491	0.0637	0.0111	0.00646	0.0279	0.00544
UID1345	TRIM24..8805./881	881	881-PRSILTSLLLNSSQSSTSEETVLRSDAPDST	8805	TRIM24	0.0941181	-0.258577	-0.144795	-0.0728626	-0.335393	0.246665	0.0746288	-0.484755	-0.279139	0.107322	-0.418376	0.0527143	-0.0362511	0.270514	-0.384873	-0.243313	0.133316	-0.222661	0.0912938	0.480107	NA	NA	-0.303886	0.117494	0.0174675	-0.331916	0.124727	0.542678	26		TRIM24..8805.	0.0231	0.0161	0.0206	0.0333	0.0152	0.0419	0.013	0.0491	0.0637	0.0111	0.00646	0.0279	0.00544
UID1346	TRIM24..8805./882	882	882-LAGPVTMTSVHPPIRSPSASSVGSRGSSGSS	8805	TRIM24	1.3726	-0.417676	0.198007	0.61182	-0.221848	0.075513	-0.166984	-0.0716489	0.280236	0.234821	-0.481881	0.25734	-0.344395	0.350588	-0.345649	0.637866	-0.526791	-0.0740937	0.138879	0.504994	0.392815	-0.132079	-0.0169803	0.117984	0.133566	-0.816613	-0.376364	-0.078145	28		TRIM24..8805.	0.0231	0.0161	0.0206	0.0333	0.0152	0.0419	0.013	0.0491	0.0637	0.0111	0.00646	0.0279	0.00544
UID1349	TRIM24..8805./883	883	883-MLGSAETPPPVPAPGSPVSGSSPFATQVGVI	8805	TRIM24	0.85087	-0.175907	-0.0036726	0.365149	-0.226401	-0.255056	0.171876	-0.133779	-0.0373785	-0.060403	0.0534736	-0.136601	-0.351415	0.282756	0.199806	0.0106274	-0.149162	-0.34783	-0.178843	0.1062	0.535957	0.127384	-0.0160553	-0.0665115	0.42762	-0.231232	0.194072	0.0199423	28		TRIM24..8805.	0.0231	0.0161	0.0206	0.0333	0.0152	0.0419	0.013	0.0491	0.0637	0.0111	0.00646	0.0279	0.00544
UID1351	AXIN1..8312./884	884	884-LDEHVQRVLRTPGRQSPGPGHRSPDSGHVAK	8312	AXIN1	0.323444	1.04288	0.138577	1.36117	-0.365666	0.0956709	1.24722	0.900845	1.02854	-0.1826	-0.0494473	-1.46369	2.16025	0.994813	0.721866	-1.61048	-0.486688	-0.775105	-0.246185	-0.644711	0.62558	0.192963	0.100801	1.31654	0.56805	0.531667	0.99028	-0.368286	28		AXIN1..8312.	0.063	0.0117	0.148	0.0791	0.048	0.0289	0.0412	0.0398	0.0446	0.0239	0.0335	0.178	0.0281
UID1353	AXIN1..8312./886	886	886-RRSDLDLGYEPEGSASPTPPYLKWAESLHSL	8312	AXIN1	-0.158485	0.775671	0.174911	0.710012	-0.287191	-0.0269141	0.309074	0.282774	0.372562	-0.533837	-0.0917192	-0.43855	0.939936	0.406695	0.485863	-0.421178	-0.3564	-0.447319	0.0971889	-0.282536	0.327727	0.216362	0.141927	0.675627	0.122952	0.119001	0.297697	-0.230928	28		AXIN1..8312.	0.063	0.0117	0.148	0.0791	0.048	0.0289	0.0412	0.0398	0.0446	0.0239	0.0335	0.178	0.0281
UID1355	PGRMC2..10424./888	888	888-ESPATSLPRMKKRDFSLEQLRQYDGSRNPRI	10424	PGRMC2	1.65384	0.532202	0.0614262	-0.178624	0.153063	NA	-0.272507	-0.247856	NA	2.94757	-0.0719137	-0.555107	0.997871	-0.531911	0.132772	0.192181	0.50286	0.154971	0.199922	-0.259286	0.635994	1.7417	1.24542	0.173347	-0.570412	0.122836	1.76651	NA	25		PGRMC2..10424.	0.038	0.0327	0.048	0.102	0.0453	0.148	0.0427	0.0525	0.0175	0.0224	0.0241	0.0136	0.0222
UID1356	PGRMC2..10424./889	889	889-WGRRGLGAGAGAGEESPATSLPRMKKRDFSL	10424	PGRMC2	0.275243	0.0778934	-0.331603	0.275106	-0.226173	-0.0940992	-0.579052	-0.0161905	-0.109066	-0.303442	-0.429595	0.234327	-0.0729195	0.0560411	-0.640596	-0.266537	0.201708	-0.348286	-0.462341	0.325223	-0.399851	-0.203228	-0.247482	0.0345656	-0.394871	-0.0974789	-0.464437	0.101672	28		PGRMC2..10424.	0.038	0.0327	0.048	0.102	0.0453	0.148	0.0427	0.0525	0.0175	0.0224	0.0241	0.0136	0.0222
UID1358	CTDSPL..10217./890	890	890-PKEDEGRLPGAGEKASQCNVSLKKQRSRSIL	10217	CTDSPL	NA	NA	NA	0.0757952	-0.25336	0.40957	NA	0.19209	0.588824	0.389501	NA	1.71755	0.0585775	0.362239	0.0447254	0.0925274	NA	0.254096	NA	-0.298375	NA	0.295298	NA	0.132414	-0.267601	0.465659	NA	0.44052	18		CTDSPL..10217.	0.0079	0.00431	0.00109	0.00512	0.0113	0.00308	0.00584	0.00371	0.00608	0.0287	0.0149	0.00642	0.0126
UID1359	CTDSPL..10217./891	891	891-GRLPGAGEKASQCNVSLKKQRSRSILSSFFC	10217	CTDSPL	-0.15878	0.166348	-0.494233	-0.178521	-0.145741	0.717188	0.125799	-0.182705	0.873251	-0.184776	0.165589	-0.0616121	0.46501	0.513304	0.0719137	-0.787056	-1.16507	-0.0319139	0.228344	-0.434627	-1.00576	-0.746884	-1.01632	1.24925	-0.106077	-0.928914	-0.696764	0.146825	28		CTDSPL..10217.	0.0079	0.00431	0.00109	0.00512	0.0113	0.00308	0.00584	0.00371	0.00608	0.0287	0.0149	0.00642	0.0126
UID1370	VILL..50853./896	896	896-YKWTSHPSHKEVVDGSPAAASTISEITAEVN	50853	VILL	0.0503364	-0.0113085	0.13232	-0.11544	-0.103848	0.0405895	0.170335	-0.119918	0.109898	-0.055553	-0.0368168	0.29181	-0.149562	-0.24327	0.539222	0.117345	-0.263994	0.153849	0.220565	0.107796	0.414666	0.97869	0.214646	0.200354	0.0692031	0.0307331	0.323604	0.542162	28		VILL..50853.	0.0328162	0.0549156	0.0437763	0.00516282	0.0294136	0.0132137	0.0118114	0.0548592	0.0393068	0.0201787	0.154858	0.0379608	0.120422
UID1372	RGL2..5863./897	897	897-___MLPRPLRLLLDTSPPGGVVLSSFRSRDP	5863	RGL2	-0.22082	-0.490553	-0.778761	-0.458707	-0.655484	-0.587042	-0.556365	0.387166	-0.384252	-0.564095	-0.946193	-0.0879555	0.354882	-0.284152	-0.677404	0.514587	-0.213325	-0.286886	-0.203551	0.723874	-0.292894	-0.552653	0.0820239	-0.110739	-0.628853	-0.214317	-0.0633712	-0.511823	28		RGL2..5863.	0.0237567	0.0123453	0.00523692	0.0303595	0.00784894	0.0383788	0.00259148	0.00797748	0.0053297	0.0135758	0.0266549	0.0236735	0.00317181
UID1377	WDR46..9277./900	900	900-RRYWEEETVPTTAGASPGPPRNKKNRELRPQ	9277	WDR46	-0.277977	-0.261866	-0.149076	-0.195616	0.162518	0.118069	-0.178777	-0.0170101	0.00117318	-0.0176536	-0.255171	0.0353403	-0.161599	0.112274	0.0160049	-0.213391	-0.240011	-0.240514	-0.129406	0.102062	-0.380594	0.245707	-0.219903	-0.212535	-0.149653	-0.285301	-0.32299	0.408566	28		WDR46..9277.	0.958255	0.999997	0.994089	0.971326	0.949112	0.999934	0.967823	0.976644	0.924614	0.979714	0.952017	0.0755349	0.979749
UID1385	ZNF185..7739./904	904	904-EGRTIELPSGRSRATSFSSAGEVPKPRPPST	7739	ZNF185	-0.0892701	-0.354654	0.68593	-0.0920971	0.823789	0.161862	0.381355	0.768591	1.00667	1.56429	-0.384831	4.25073	0.0200122	-0.523593	0.0374416	-0.382612	-0.142949	3.47001	1.15608	-0.369735	1.84538	2.64716	-0.190079	0.518325	-0.192286	1.47823	0.356843	1.74798	28		ZNF185..7739.	0.117596	0.199882	0.0911957	0.222133	0.0632544	0.120014	0.0805102	0.132676	0.176199	0.0105448	0.031791	0.207796	0.0354245
UID1386	ZNF185..7739./905	905	905-RQSSPSGSEQLVRRESCGSSVLTDFEGKDVA	7739	ZNF185	-0.459795	-0.137171	0.620258	-0.0610785	0.517202	0.138784	0.298013	0.272115	0.923831	0.781232	-0.396631	3.78998	-0.558342	-0.610772	0.889096	-0.367336	-0.197397	3.21536	1.55107	-0.842409	2.22872	2.1805	-0.363472	0.465748	-0.541135	2.91415	0.1004	0.935839	28		ZNF185..7739.	0.117596	0.199882	0.0911957	0.222133	0.0632544	0.120014	0.0805102	0.132676	0.176199	0.0105448	0.031791	0.207796	0.0354245
UID1389	ZNF185..7739./907	907	907-GQGDPAVPAQQPADPSTPERQSSPSGSEQLV	7739	ZNF185	-0.866265	0.204665	1.00127	-0.0186779	-0.160778	-0.257183	-0.0116773	0.432815	0.455735	0.087894	0.112614	2.54787	-0.430843	-0.347714	0.017293	-0.479703	-0.162654	1.65075	0.232244	-0.973651	0.892298	0.948138	0.0426366	1.04456	-0.864923	0.971611	-0.216396	0.556836	28		ZNF185..7739.	0.117596	0.199882	0.0911957	0.222133	0.0632544	0.120014	0.0805102	0.132676	0.176199	0.0105448	0.031791	0.207796	0.0354245
UID1391	ZNF185..7739./909	909	909-PAQQPADPSTPERQSSPSGSEQLVRRESCGS	7739	ZNF185	-0.517709	0.35314	0.16898	0.199976	0.604234	0.336763	0.392846	0.275427	0.900696	0.624646	-0.863167	3.13827	-0.409815	-0.524481	1.08683	-0.565521	-0.897055	3.49405	1.89596	-0.847692	0.849299	2.72367	-1.34372	0.915416	-0.405581	2.93541	-0.0821242	1.14765	28		ZNF185..7739.	0.117596	0.199882	0.0911957	0.222133	0.0632544	0.120014	0.0805102	0.132676	0.176199	0.0105448	0.031791	0.207796	0.0354245
UID1392	ZNF185..7739./910	910	910-GQGDPAVPTQQPADPSTPEQQNSPSGSEQFV	7739	ZNF185	-1.31106	0.697933	0.190422	-0.0730612	1.05532	0.198487	0.00810623	0.223236	0.678225	0.14887	0.0279379	3.80992	-0.920368	-0.565078	1.0405	-1.12219	-1.73154	3.1601	1.72196	-1.10714	1.14777	NA	-0.946807	1.08214	-1.02999	3.09663	-0.434978	1.62818	27		ZNF185..7739.	0.117596	0.199882	0.0911957	0.222133	0.0632544	0.120014	0.0805102	0.132676	0.176199	0.0105448	0.031791	0.207796	0.0354245
UID1393	ZNF185..7739./911	911	911-PTQQPADPSTPEQQNSPSGSEQFVRRESCTS	7739	ZNF185	-0.250487	0.508251	-0.051204	-0.0467591	0.596295	0.664793	0.27409	0.261218	0.0895073	0.449516	-0.247404	2.07216	0.0447458	0.259994	0.302799	-0.0787716	-0.352369	2.31457	0.939558	-0.336627	0.687403	1.64325	-0.267881	0.425278	-0.0892757	1.71615	0.0739344	0.691754	28		ZNF185..7739.	0.117596	0.199882	0.0911957	0.222133	0.0632544	0.120014	0.0805102	0.132676	0.176199	0.0105448	0.031791	0.207796	0.0354245
UID1395	ZNF185..7739./912	912	912-REHSYVLSAAKKSTGSPTQETQAPFIAKRVE	7739	ZNF185	-0.903999	0.339731	0.0262006	-0.210685	0.417175	0.156582	0.408329	0.300547	0.489257	0.900925	-0.414919	3.7896	0.148383	-0.570943	0.802541	-0.756425	-0.706505	2.9223	1.54162	-0.791932	0.714238	2.2822	-0.447447	1.18268	-0.417645	3.0699	-0.115998	1.53673	28		ZNF185..7739.	0.117596	0.199882	0.0911957	0.222133	0.0632544	0.120014	0.0805102	0.132676	0.176199	0.0105448	0.031791	0.207796	0.0354245
UID1396	ZNF185..7739./913	913	913-TTEDYKKLAPYNIRRSSTSGDTEEEEEEEVV	7739	ZNF185	-0.471183	-0.220772	0.175884	-0.0198691	0.245554	0.111748	0.317689	0.595892	0.76848	1.29233	-0.454066	2.99426	-0.0786777	-0.10836	1.03543	-0.69688	-0.439502	3.25495	1.28197	-0.382265	1.50725	1.89075	-0.227337	0.763586	-0.329141	2.81142	0.486222	0.626571	28		ZNF185..7739.	0.117596	0.199882	0.0911957	0.222133	0.0632544	0.120014	0.0805102	0.132676	0.176199	0.0105448	0.031791	0.207796	0.0354245
UID1404	ZNF185..7739./919	919	919-ASLVRTANAGPPRPSSSGYKMTTEDYKKLAP	7739	ZNF185	-0.542155	0.0185974	0.231096	-0.401582	0.415794	0.0608482	-0.221421	0.797021	0.41339	0.549054	-0.166083	2.41932	-0.572898	-0.802979	0.592907	-0.0748994	-0.0590487	3.05893	1.06579	-0.439046	0.59907	2.88343	-0.0680525	-0.106177	-0.371491	2.007	-0.111928	0.937444	28		ZNF185..7739.	0.117596	0.199882	0.0911957	0.222133	0.0632544	0.120014	0.0805102	0.132676	0.176199	0.0105448	0.031791	0.207796	0.0354245
UID1410	ZNF185..7739./922	922	922-EEEVVPFSSDEQKRSSPTQETQAPFIAKRVE	7739	ZNF185	NA	0.633749	-0.450043	0.237885	0.481643	0.279487	0.0865021	0.430308	0.687627	-0.410034	-0.28254	1.61301	-0.214624	NA	0.0265107	-0.55486	-0.349361	2.30339	0.945365	-0.186053	NA	0.167871	-0.104402	0.997437	-0.15591	0.231287	NA	-0.0341692	24		ZNF185..7739.	0.117596	0.199882	0.0911957	0.222133	0.0632544	0.120014	0.0805102	0.132676	0.176199	0.0105448	0.031791	0.207796	0.0354245
UID1411	CASC3..22794./923	923	923-SYRSRRLEQTSVRDPSPEADAPVLGSPEKEE	22794	CASC3	-0.111904	0.470501	-0.0563151	0.396919	0.0522321	-0.0458166	0.20153	0.397117	0.0666022	0.334627	0.159558	-0.143602	0.140564	0.349365	0.170368	0.169528	-0.172407	0.0924236	-0.0438509	0.0639199	0.197322	0.173835	0.263056	0.185326	0.458114	0.179711	0.294826	0.0612863	28		CASC3..22794.	0.618695	0.0235063	0.15358	0.311532	0.387949	0.474847	0.646084	0.413568	0.488706	0.132675	0.0788052	0.143581	0.155194
UID1413	CASC3..22794./924	924	924-ASGSDSGGSPLRGGGSCSGSAGGGGSGSLPS	22794	CASC3	NA	0.0221262	-0.0922165	0.292844	0.139487	0.343923	NA	0.0630846	0.26367	0.301378	0.0504427	0.213927	0.0136633	0.266333	0.0803509	0.222784	-0.000780106	-0.00233245	-0.32399	0.197631	NA	0.16683	0.21346	0.386068	0.0666819	0.178041	NA	-0.0108836	24		CASC3..22794.	0.618695	0.0235063	0.15358	0.311532	0.387949	0.474847	0.646084	0.413568	0.488706	0.132675	0.0788052	0.143581	0.155194
UID1414	CASC3..22794./925	925	925-LRGGGSCSGSAGGGGSGSLPSQRGGRTGALH	22794	CASC3	-0.0679424	0.41908	0.248921	0.419222	0.0908756	0.11474	-0.0663913	0.198578	0.10666	0.556848	0.145676	-0.339737	0.480314	-0.131239	0.647222	0.416932	0.0063192	0.162202	0.0851285	0.107697	-0.0294304	-0.0779514	0.176921	0.262817	0.260225	0.339602	0.247564	-0.12107	28		CASC3..22794.	0.618695	0.0235063	0.15358	0.311532	0.387949	0.474847	0.646084	0.413568	0.488706	0.132675	0.0788052	0.143581	0.155194
UID1416	CASC3..22794./926	926	926-EEKPDTKSTVTGERQSGDGQESTEPVENKVG	22794	CASC3	-0.35371	0.0782882	0.370173	0.34994	-0.0539214	0.612107	0.283123	0.110466	0.0569282	-0.067197	0.154651	-0.3208	0.25428	0.368823	-0.0247615	0.426586	-0.399496	-0.141298	-0.203481	0.0936173	-0.015433	0.524538	-0.129847	0.152914	0.128459	0.0880235	0.238445	0.062575	28		CASC3..22794.	0.618695	0.0235063	0.15358	0.311532	0.387949	0.474847	0.646084	0.413568	0.488706	0.132675	0.0788052	0.143581	0.155194
UID1418	CASC3..22794./927	927	927-EGEYSEEENSKVELKSEANDAVNSSTKEEKG	22794	CASC3	NA	-0.112896	0.186722	-0.164683	0.180483	0.146108	NA	0.146081	0.00497675	0.0470474	0.0426769	NA	0.153286	0.0968981	-0.269206	0.0602646	-0.0407438	-0.0914772	-0.258795	NA	NA	NA	-0.0511813	-0.126006	NA	0.175529	NA	-0.113268	20		CASC3..22794.	0.618695	0.0235063	0.15358	0.311532	0.387949	0.474847	0.646084	0.413568	0.488706	0.132675	0.0788052	0.143581	0.155194
UID1419	CASC3..22794./928	928	928-NSKVELKSEANDAVNSSTKEEKGEEKPDTKS	22794	CASC3	-0.249857	0.0850409	0.0815843	0.263199	-0.256584	0.418785	0.282018	0.064126	0.00632811	-0.115431	0.313918	-0.783842	0.0752865	0.0656986	0.0525421	-0.49139	-0.210961	0.0566557	-0.26972	-0.0679148	-0.0565815	0.224813	-0.0298495	0.211791	0.0921427	-0.0550849	0.248162	-0.258483	28		CASC3..22794.	0.618695	0.0235063	0.15358	0.311532	0.387949	0.474847	0.646084	0.413568	0.488706	0.132675	0.0788052	0.143581	0.155194
UID1421	CASC3..22794./930	930	930-PDDIKPRRIRKPRYGSPPQRDPNWNGERLNK	22794	CASC3	0.0395077	0.212897	0.723479	0.486522	0.259602	0.343566	0.475055	0.268104	-0.191589	-0.0359241	0.275526	-0.0798229	0.26386	0.655565	0.112249	0.401716	-0.297489	0.330333	0.0144612	0.259969	0.434165	0.433083	0.108476	0.239017	0.246365	0.216003	0.164442	-0.0780532	28		CASC3..22794.	0.618695	0.0235063	0.15358	0.311532	0.387949	0.474847	0.646084	0.413568	0.488706	0.132675	0.0788052	0.143581	0.155194
UID1422	VGF..7425./931	931	931-GLGGRGLQEAAEERESAREEEEAEQERRGGE	7425	VGF	0.445091	-0.450201	-0.0866327	NA	0.105135	-0.138002	0.064425	-0.285602	0.359732	0.270508	0.359778	-0.408185	0.161529	NA	0.640721	0.226267	5.12373	0.361123	-0.125634	0.211889	NA	NA	0.218128	NA	-0.0459023	0.250522	0.645094	NA	22		VGF..7425.	0.00357	0.0159	0.0112	0.0258	0.00878	0.0281	0.122	0.0296	0.0176	0.00874	0.0182	0.0115	0.00381
UID1424	VGF..7425./933	933	933-LPPPAPSQFQARMPDSGPLPETHKFGEGVSS	7425	VGF	-0.429212	-1.14639	0.402847	NA	0.33007	NA	-0.357197	NA	NA	0.807648	0.210205	0.0185881	NA	NA	0.0649595	-0.121861	3.74934	0.690943	3.76701e-05	-0.303274	NA	NA	0.501875	NA	0.365008	0.104141	0.0384417	NA	18		VGF..7425.	0.00357	0.0159	0.0112	0.0258	0.00878	0.0281	0.122	0.0296	0.0176	0.00874	0.0182	0.0115	0.00381
UID1425	VGF..7425./934	934	934-GPKDGSAPEVRGARNSEPQDEGELFQGVDPR	7425	VGF	-0.321535	-0.337759	NA	NA	NA	NA	-0.288283	NA	NA	NA	-0.0101252	0.0734015	NA	NA	-0.174995	0.209128	1.46422	NA	-0.211489	0.241232	NA	NA	-0.348228	NA	-0.199809	-0.0515957	-0.0643568	NA	14		VGF..7425.	0.00357	0.0159	0.0112	0.0258	0.00878	0.0281	0.122	0.0296	0.0176	0.00874	0.0182	0.0115	0.00381
UID1426	VGF..7425./935	935	935-FAEEEDGEAGAEDKRSQEETPGHRRKEAEGT	7425	VGF	-0.50451	-0.436513	-0.331906	NA	0.0286183	0.218048	-0.0876718	-0.517085	0.0199404	-0.22908	0.056087	0.174087	-0.0920157	2.42293	-0.0892453	0.354142	5.76197	0.292304	-0.387535	-0.148739	-0.988727	-1.15172	0.0953062	NA	-0.0262918	-0.0970626	1.70168	NA	25		VGF..7425.	0.00357	0.0159	0.0112	0.0258	0.00878	0.0281	0.122	0.0296	0.0176	0.00874	0.0182	0.0115	0.00381
UID1427	RER1..11079./936	936	936-IAFLSPKVDPSLMEDSDDGPSLPTKQNEEFR	11079	RER1	0.790414	-0.0573688	0.47158	0.305311	0.258351	0.25755	0.322093	0.0421085	0.40371	0.555432	0.477825	0.358937	0.307486	0.307638	0.381867	0.0661116	0.0756637	0.0490406	0.0153125	0.24667	0.764092	0.645802	0.424146	0.031929	0.26839	0.759611	0.961572	0.63916	28		RER1..11079.	0.358125	0.259026	0.548815	0.189724	0.0521668	0.128398	0.239715	0.144101	0.248829	0.0469845	0.0505572	0.0403538	0.0792784
UID1429	MAPK13..5603./937	937	937-VDEWKQHIYKEIVNFSPIARKDSRRRSGMKL	5603	MAPK13	0.27359	0.280728	-0.27643	0.562345	-0.450121	0.469077	0.673185	0.198566	0.541055	0.17758	0.840304	-0.145602	0.29608	-0.234833	0.334228	-0.613661	-0.63847	0.00365051	1.20151	0.13872	1.16522	-0.452784	0.877699	-0.0621783	0.291601	-0.197006	0.210004	0.694263	28		MAPK13..5603.	0.0383928	0.0210241	0.0184327	0.0118453	0.0385796	0.0420819	0.0714809	0.0590495	0.0178675	0.0117298	0.0350822	0.0389942	0.0512413
UID1433	ATXN7..6314./938	938	938-SHTPLDKLIGKKRKCSPSSSSINNSSSKPTK	6314	ATXN7	-0.154771	NA	NA	0.244867	NA	0.551004	0.513422	-0.0367107	0.484763	-1.28871	NA	-0.910345	-0.609282	0.0675831	NA	NA	NA	0.111049	NA	-0.294825	0.429277	NA	NA	-0.45079	-0.159926	NA	0.131215	0.193617	17		ATXN7..6314.	0.0185	0.0984	0.00296	0.0415	0.0229	0.0274	0.0574	0.0189	0.0846	0.0193	0.0559	0.0444	0.0247
UID1436	OGT..8473./940	940	940-VGNVADSTEPTKRMLSFQGLAELAHREYQAG	8473	OGT	-0.286229	-0.29827	-0.0887585	-0.185212	0.109499	-0.180756	-0.0939999	0.0128589	-0.0148279	0.268253	-0.0570638	0.313827	0.0664599	-0.266616	0.0206385	0.181676	0.135032	0.222988	0.087254	-0.054492	0.100782	0.175818	-0.272463	-0.464498	-0.267452	-0.0343933	-0.33611	0.0481834	28		OGT..8473.	0.947938	0.95051	0.948958	0.964596	0.971154	0.941214	0.966585	0.995595	0.90947	0.977165	0.987799	0.235894	0.938944
UID1437	PPM1D..8493./941	941	941-TQIVVEPEPTAEEKPSPRRSLSQPLPPRPSP	8493	PPM1D	-0.633326	1.5175	0.184844	-0.643538	1.05013	-0.383838	NA	NA	-1.13529	-0.556007	NA	-1.48377	NA	-0.0119247	-0.617121	-1.13721	NA	NA	NA	-0.679664	-0.247774	-0.602509	NA	0.13468	-0.453635	-0.171977	-0.475473	-0.90178	20		PPM1D..8493.	0.141744	0.912101	0.0160014	0.813001	0.561036	0.135211	0.0225249	0.0401628	0.101401	0.418227	0.0069824	0.479661	0.667971
UID1438	POLR3G..10622./942	942	942-LKKMEELEKRGDGEKSDEENEEKEGSKEKSK	10622	POLR3G	-0.882971	-0.563861	-0.984013	0.0987598	0.624344	0.0295332	0.565242	-0.601217	-0.907559	0.290578	-0.532381	-1.48917	-0.148796	0.204805	-1.15909	-0.16437	-0.202536	-0.878877	-0.55255	0.797594	-0.610236	-0.541268	-0.320295	0.659571	-0.380909	-0.0651143	-0.696476	-0.974115	28		POLR3G..10622.	0.352572	0.143515	0.494493	0.116518	0.052555	0.470565	0.362626	0.0562752	0.123585	0.0231595	0.0150659	0.101022	0.0548642
UID1442	MID1..4281./944	944	944-NIIDRFQKASVSGPNSPSETRRERAFDANTM	4281	MID1	0.538085	0.463158	-0.61205	-0.244015	0.661999	-0.176623	0.580657	-0.539518	0.332145	-0.869875	-0.464043	1.45406	0.107616	-0.317936	-0.222247	1.57907	0.0889761	1.05685	-0.0857306	-1.12885	-0.754777	0.234434	-0.00953786	-0.0566975	1.10537	-0.213667	0.12423	0.248875	28		MID1..4281.	0.00724	0.0311	0.00549	0.0161	0.00331	0.00584	0.00709	0.00442	0.0211	0.00242	0.00953	0.0167	0.00244
UID1445	TP73..7161./947	947	947-SSAKNGAASKRAFKQSPPAVPALGAGVKKRR	7161	TP73	0.433712	-0.35811	-0.807474	-0.183364	-0.520868	-0.192585	-1.03701	0.0848246	-0.670471	-1.16721	-0.774657	-0.305361	-0.809361	0.54269	NA	NA	0.788702	-0.0218327	0.418242	-0.825237	-0.857434	-0.350625	-0.804726	-0.0901027	-0.695848	NA	-0.315607	-0.567985	25		TP73..7161.	0.196	0.0996	0.0701	0.165	0.087	0.0973	0.17	0.116	0.281	0.0137	0.00731	0.162	0.134
UID1447	PPM1G..5496./948	948	948-LNGEAGPEDSTRETPSQENGPTAKAYTGFSS	5496	PPM1G	0.546776	0.136654	1.2551	-0.299409	-0.0229034	0.113893	0.00888777	-0.299102	0.0955119	0.875689	0.44797	0.38121	0.191551	0.323658	-0.0773077	-0.268281	1.46357	0.646942	0.515544	-0.412455	1.00373	0.799208	0.0730309	0.148176	-0.185341	0.020071	0.792124	0.449045	28		PPM1G..5496.	0.213051	0.169572	0.115591	0.559384	0.229022	0.157794	0.141952	0.140898	0.262642	0.56503	0.0993957	0.382018	0.354234
UID1450	PPM1G..5496./951	951	951-PPHSKSGGGTGEEPGSQGLNGEAGPEDSTRE	5496	PPM1G	0.243582	-0.0454679	NA	-0.308598	NA	0.0880556	0.133914	-0.228529	0.104743	0.526532	0.276061	0.596462	-0.119582	-0.191209	0.121728	-0.0363941	0.786645	-0.161185	0.347414	0.0145774	NA	NA	-0.172056	-0.0489254	0.102643	0.163258	0.567486	0.322767	24		PPM1G..5496.	0.213051	0.169572	0.115591	0.559384	0.229022	0.157794	0.141952	0.140898	0.262642	0.56503	0.0993957	0.382018	0.354234
UID1451	INPPL1..3636./952	952	952-VEGEREPDPPDDRDASDGEDEKPPLPPRSGS	3636	INPPL1	1.05771	-0.434855	-0.322722	-0.0289505	0.145151	0.151055	0.146152	0.23233	0.253006	0.344589	0.127692	0.879837	0.410753	-0.0830841	-0.0910978	1.33478	-0.533153	0.00942659	0.349914	0.478273	-0.257802	0.59048	0.689206	0.283747	0.240417	0.572636	0.444609	0.238536	28		INPPL1..3636.	0.0489	0.0495	0.0494	0.108	0.189	0.223	0.084	0.067	0.0625	0.0359	0.0695	0.134	0.0509
UID1453	INPPL1..3636./953	953	953-VLEGVPHQLLPPEPPSPARAPVPSATKNKVA	3636	INPPL1	0.702869	-0.106184	-0.142135	-0.489751	-0.201085	-0.358664	-0.1149	-0.179216	-0.243066	-0.205623	-0.204849	0.251063	-0.305887	-0.33093	-0.402114	0.487007	-0.182208	-0.420506	-0.000258446	0.394107	-0.136499	0.0585979	0.0123642	-0.103403	-0.0109275	0.114516	-0.17448	-0.213516	28		INPPL1..3636.	0.0489	0.0495	0.0494	0.108	0.189	0.223	0.084	0.067	0.0625	0.0359	0.0695	0.134	0.0509
UID1454	INPPL1..3636./954	954	954-VLSGLEILSKVFDQQSSPMVTRLLQQQNLPQ	3636	INPPL1	0.47672	0.258118	NA	NA	NA	NA	0.167671	NA	NA	NA	0.353915	-0.107656	NA	NA	0.419849	0.26943	0.0771475	NA	0.448884	0.0808396	NA	NA	0.428947	NA	0.253806	0.267011	-0.0287371	NA	14		INPPL1..3636.	0.0489	0.0495	0.0494	0.108	0.189	0.223	0.084	0.067	0.0625	0.0359	0.0695	0.134	0.0509
UID1455	INPPL1..3636./955	955	955-LSGLEILSKVFDQQSSPMVTRLLQQQNLPQT	3636	INPPL1	0.252263	0.0213108	-0.0473552	-0.0439961	-0.178393	0.0343666	-0.0295029	-0.157338	0.205451	0.328146	-0.393624	-0.196247	0.074156	-0.168896	-0.210235	-0.156465	-0.191075	0.0410521	-0.124262	-0.0180407	-0.0152877	0.329382	-0.151128	0.16558	-0.0586681	0.0789337	-0.000963449	0.20454	28		INPPL1..3636.	0.0489	0.0495	0.0494	0.108	0.189	0.223	0.084	0.067	0.0625	0.0359	0.0695	0.134	0.0509
UID1456	EIF3D..8664./956	956	956-VRQKWDQKSQKPRDSSVEVRSDWEVKEEMDF	8664	EIF3D	-0.305441	0.51668	-0.423704	0.199949	0.174649	0.0585014	0.131207	-0.455498	-0.479788	0.414419	0.413805	-1.02398	0.706402	-0.101345	-0.545943	-0.222389	-0.629233	-0.530412	-0.249026	0.0501215	-0.0812798	-0.647573	-0.0767156	0.199078	-0.456381	-1.11098	0.593022	-0.190306	28		EIF3D..8664.	0.990497	0.973329	0.877243	0.963517	0.994404	0.858637	0.96751	0.997243	0.971695	0.974073	0.970332	0.865992	0.965459
UID1457	EIF3H..8667./957	957	957-RLTPKLMEVCKEKDFSPEALKKANITFEYMF	8667	EIF3H	0.565378	0.0111508	-0.534448	-0.0415689	0.100236	-0.266218	0.364388	0.0977856	-0.445657	-0.274177	-0.288089	-0.0139761	-0.477398	0.0999985	-0.262465	0.111499	-0.410977	-0.126916	-0.00982126	0.402424	-0.091526	-0.336434	-0.598375	-0.377078	0.374727	-0.747517	-0.323158	0.123965	28		EIF3H..8667.	0.941233	0.969645	0.91386	0.958379	0.866962	0.950117	0.929404	0.980764	0.984912	0.975648	0.980211	0.501865	0.956183
UID1460	HDAC3..8841./958	958	958-APNEFYDGDHDNDKESDVEI___________	8841	HDAC3	-0.459632	-0.317455	-1.11351	-0.579857	-0.456136	-0.313609	NA	-0.205537	-0.323137	-0.560621	-0.19136	NA	-0.175485	-0.599626	-0.361571	-0.354557	-0.330108	-0.469263	0.121737	NA	-0.80803	-0.106453	-0.0480704	-0.646362	NA	0.273968	0.265229	-0.122967	24		HDAC3..8841.	0.949291	0.933232	0.949078	0.925909	0.960258	0.924927	0.794798	0.94093	0.89317	0.977045	0.964051	0.738205	0.844891
UID1461	HDAC3..8841./959	959	959-CRFHSEDYIDFLQRVSPTNMQGFTKSLNAFN	8841	HDAC3	-0.0305309	-0.0642085	0.40355	NA	0.195333	-0.554272	-0.0588703	-0.210479	-0.138751	0.847324	0.142071	NA	-0.0787654	-0.216694	-0.247211	0.111185	0.475763	-0.0222588	0.0962329	NA	0.37937	0.402738	0.0886986	NA	NA	-0.162493	0.0377746	NA	22		HDAC3..8841.	0.949291	0.933232	0.949078	0.925909	0.960258	0.924927	0.794798	0.94093	0.89317	0.977045	0.964051	0.738205	0.844891
UID1468	STX7..8417./960	960	960-REKEFVARVRASSRVSGSFPEDSSKERNLVS	8417	STX7	0.903596	-0.443714	-0.303683	-1.00552	0.0183678	-0.60943	0.248966	-0.461327	-0.050303	-0.316896	0.347173	-0.0741371	0.517044	-0.337061	0.536036	0.803194	-0.662764	1.10006	0.157165	-0.478016	-0.346291	0.815748	0.488431	-1.1667	-0.83821	-0.383718	-0.158561	0.0185083	28		STX7..8417.	0.0165993	0.0194899	0.0414355	0.0285909	0.0145203	0.0917368	0.0258561	0.0462776	0.0382139	0.0445641	0.0578843	0.111021	0.0157634
UID1469	STX7..8417./961	961	961-KEFVARVRASSRVSGSFPEDSSKERNLVSWE	8417	STX7	0.783651	-0.139137	-0.179626	-0.0141308	0.0981851	-0.195045	0.425591	-0.18489	0.28649	-0.201759	0.748704	0.557238	0.21856	0.000535965	0.445429	1.34131	-0.909529	1.20361	0.356879	-0.121872	0.722544	1.59069	0.596674	-0.643758	-0.281145	-0.295083	-0.0704603	0.330422	28		STX7..8417.	0.0165993	0.0194899	0.0414355	0.0285909	0.0145203	0.0917368	0.0258561	0.0462776	0.0382139	0.0445641	0.0578843	0.111021	0.0157634
UID1475	FOXP2..93986./962	962	962-DEVEYQKRRSQKITGSPTLVKNIPTSLGYGA	93986	FOXP2	0.427745	-0.968149	-0.1777	NA	NA	-0.00362063	1.11745	-0.21362	-0.403933	NA	0.0218275	0.238883	0.595472	NA	-0.0543394	0.634187	2.83973	0.0337009	0.161451	0.235897	NA	NA	-0.259467	NA	0.599626	0.383735	1.19371	NA	20		FOXP2..93986.	0.0197556	0.00871405	0.0399768	0.0413707	0.0122561	0.0335311	0.01901	0.0226631	0.0940284	0.00679345	0.0270908	0.0914949	0.0434296
UID1477	TNRC18..84629./964	964	964-ASGGGYRLGARERALSPGLEESGLGLLARFA	84629	TNRC18	0.0154481	-0.0637819	0.213546	0.119578	0.174161	0.154459	0.376513	0.487246	0.460534	0.00993967	-0.129839	0.27961	0.39102	0.199265	0.305787	0.304048	-0.106726	0.556387	0.191502	-0.591763	0.250903	0.371851	0.156076	0.378912	0.172046	0.229941	0.348565	0.368072	28		TNRC18..84629.	0.0236186	0.0273709	0.0288153	0.125047	0.0131661	0.0300063	0.0227611	0.188428	0.00151708	0.0116563	0.059961	0.163396	0.00327295
UID1478	TNRC18..84629./965	965	965-GTYGKAVSPPPSPRASPVAALKAKVIQKLED	84629	TNRC18	0.250758	-0.0368578	-0.250397	0.194749	-0.0727965	0.179629	0.311979	0.358316	0.433314	-0.0326365	0.0984912	0.120208	0.302655	0.205531	0.347662	0.49975	-0.199462	0.376894	0.312371	-0.42344	-0.135003	0.400022	0.153736	0.283322	0.463196	0.124304	0.0364003	0.350489	28		TNRC18..84629.	0.0236186	0.0273709	0.0288153	0.125047	0.0131661	0.0300063	0.0227611	0.188428	0.00151708	0.0116563	0.059961	0.163396	0.00327295
UID1479	TNRC18..84629./966	966	966-EPGPGLTFEDSGNPKSPDKAQAEQDGAEESE	84629	TNRC18	-0.101792	-0.21633	-0.513062	-0.140123	-0.0542278	0.0889767	-0.56279	0.407277	0.364936	-0.929767	-1.53507	-0.307125	0.163314	0.129651	-0.349046	0.00493526	-0.193105	0.476729	0.0349555	-0.623581	0.057346	0.454064	-0.973872	0.199782	-0.316857	0.397672	0.420522	0.32486	28		TNRC18..84629.	0.0236186	0.0273709	0.0288153	0.125047	0.0131661	0.0300063	0.0227611	0.188428	0.00151708	0.0116563	0.059961	0.163396	0.00327295
UID1480	TNRC18..84629./967	967	967-PGLAAGPAGTYGKAVSPPPSPRASPVAALKA	84629	TNRC18	-0.150445	0.079586	0.101794	0.254232	0.208951	0.0141354	0.471531	0.0536528	0.146197	0.0628548	NA	0.100897	0.407439	0.241614	NA	NA	NA	0.387067	NA	0.133169	0.157811	0.143742	NA	0.441957	0.267264	NA	0.211535	0.462881	21		TNRC18..84629.	0.0236186	0.0273709	0.0288153	0.125047	0.0131661	0.0300063	0.0227611	0.188428	0.00151708	0.0116563	0.059961	0.163396	0.00327295
UID1483	TNRC18..84629./968	968	968-NVVEKKDLELEKEAPSPFQALFSDIPPRYPF	84629	TNRC18	NA	0.0566864	-0.0346637	NA	-0.183255	0.0227761	0.136782	-0.130529	-0.258959	-0.155491	0.0805657	NA	-0.0428662	NA	-0.166474	-0.120475	-0.0448716	-0.251393	-0.222578	NA	NA	NA	-0.62187	NA	NA	-0.323931	NA	NA	17		TNRC18..84629.	0.0236186	0.0273709	0.0288153	0.125047	0.0131661	0.0300063	0.0227611	0.188428	0.00151708	0.0116563	0.059961	0.163396	0.00327295
UID1485	TNRC18..84629./969	969	969-SGLGLLARFAASALPSPTVGPSLSVVQLEAK	84629	TNRC18	0.746446	-0.262248	0.118356	-0.271557	-0.0660569	0.0946178	0.504964	NA	0.472886	0.38725	-0.341186	0.329396	NA	-0.0413256	0.291507	0.428511	0.147797	0.275595	0.229155	0.148794	0.264417	0.238549	-0.282209	0.0123615	-0.0265803	-0.16025	0.241138	0.343928	26		TNRC18..84629.	0.0236186	0.0273709	0.0288153	0.125047	0.0131661	0.0300063	0.0227611	0.188428	0.00151708	0.0116563	0.059961	0.163396	0.00327295
UID1487	TNRC18..84629./970	970	970-APATKTSRCAKGGPLSPRKDAGRAKDRKDPR	84629	TNRC18	-0.193166	0.0266702	0.242666	0.0844212	0.148855	0.148903	-0.0505204	0.133775	0.278765	-0.630357	-0.0913879	0.235553	-0.0593982	NA	0.272588	0.307324	0.0329016	0.789412	0.251081	-0.520359	NA	0.529469	0.0432744	0.144333	-0.103351	0.366276	-0.180745	0.440628	26		TNRC18..84629.	0.0236186	0.0273709	0.0288153	0.125047	0.0131661	0.0300063	0.0227611	0.188428	0.00151708	0.0116563	0.059961	0.163396	0.00327295
UID1488	TNRC18..84629./971	971	971-SLAAPTPGARGPDPSSPDKAKLAVEKGRKAR	84629	TNRC18	-0.0881357	0.399793	NA	0.201337	0.101369	0.388988	-0.0140028	0.100675	0.0845387	-0.126175	-0.122743	0.174475	0.0963373	0.459484	-0.211826	0.268775	0.176168	0.52791	0.234554	-0.592865	NA	0.555285	0.173684	0.123326	0.0866771	0.278346	-0.707372	0.36852	26		TNRC18..84629.	0.0236186	0.0273709	0.0288153	0.125047	0.0131661	0.0300063	0.0227611	0.188428	0.00151708	0.0116563	0.059961	0.163396	0.00327295
UID1489	TNRC18..84629./972	972	972-ARDAVAVRPGGCGKKSPFGGLGTMKPEPAPT	84629	TNRC18	0.271525	-0.263853	0.189267	-0.019424	-0.261738	0.0340549	-0.00527032	0.182965	0.255932	-0.3954	-0.0485927	-0.916168	0.20725	0.272475	0.0145133	0.165188	-0.259109	-0.0740409	-0.132097	-0.817084	-0.125937	0.503253	-0.0790013	0.0578607	0.407156	-0.365362	0.0272918	-0.0958411	28		TNRC18..84629.	0.0236186	0.0273709	0.0288153	0.125047	0.0131661	0.0300063	0.0227611	0.188428	0.00151708	0.0116563	0.059961	0.163396	0.00327295
UID1490	TNRC18..84629./973	973	973-EGRQDRGPPRLAERLSPFLAESKTKNAALQP	84629	TNRC18	0.103758	-0.377761	-0.242049	0.0946921	-0.566853	-0.895839	-0.169739	0.126178	0.217793	-0.273718	-0.305492	-0.2447	0.091396	0.223263	-0.00838184	0.119076	-0.313169	-0.377532	-0.1173	-1.04734	-0.419632	-0.00770219	-0.23193	-0.11075	0.337936	-0.227367	-0.195851	0.160408	28		TNRC18..84629.	0.0236186	0.0273709	0.0288153	0.125047	0.0131661	0.0300063	0.0227611	0.188428	0.00151708	0.0116563	0.059961	0.163396	0.00327295
UID1491	TNRC18..84629./974	974	974-PDVPLPADGPERLALSPEDKPIRLSPSKITE	84629	TNRC18	0.149682	-0.466131	0.179074	NA	0.0345531	NA	0.606021	NA	NA	0.536152	0.0333934	0.191621	NA	0.0907688	0.480518	0.48984	-0.0269046	0.370768	0.264274	-0.933446	0.187471	0.40758	0.166461	NA	0.252645	0.126166	0.34485	NA	21		TNRC18..84629.	0.0236186	0.0273709	0.0288153	0.125047	0.0131661	0.0300063	0.0227611	0.188428	0.00151708	0.0116563	0.059961	0.163396	0.00327295
UID1500	TNRC18..84629./977	977	977-HLPTTKELAKRQRLPSVENRPKIAAFLPARQ	84629	TNRC18	1.21322	0.0628262	0.722404	-0.30139	0.567807	0.0786114	NA	1.00809	1.43447	0.887297	NA	NA	0.565453	0.165445	NA	NA	NA	0.789667	NA	NA	1.79955	0.534408	NA	1.15426	NA	NA	0.292214	0.614386	17		TNRC18..84629.	0.0236186	0.0273709	0.0288153	0.125047	0.0131661	0.0300063	0.0227611	0.188428	0.00151708	0.0116563	0.059961	0.163396	0.00327295
UID1501	TNRC18..84629./978	978	978-ALAAAAELPQARPLPSPGAAGAQALEKLEAA	84629	TNRC18	-0.0276831	-0.254301	-0.0132771	-0.0486859	0.114477	-0.0825629	0.0523551	0.00616233	0.159442	0.157814	0.00843382	0.0108519	-0.0971403	0.0419877	0.210463	0.215754	-0.148797	0.0834254	0.131857	-0.204072	-0.113239	0.166193	-0.123807	0.453893	-0.0825939	-0.062151	-0.0147036	0.00731214	28		TNRC18..84629.	0.0236186	0.0273709	0.0288153	0.125047	0.0131661	0.0300063	0.0227611	0.188428	0.00151708	0.0116563	0.059961	0.163396	0.00327295
UID1503	TNRC18..84629./979	979	979-FEYTDSESEVKVRKRSPAGLLRPKKGLGEPG	84629	TNRC18	0.529644	0.255842	NA	0.41364	NA	0.470875	0.392895	0.524495	0.387476	0.4589	0.0554991	0.671094	0.494583	0.399348	0.127611	0.654316	0.133711	0.608686	0.215275	-0.220229	0.483221	NA	-0.26189	0.443624	0.215523	0.0968542	0.204547	0.737288	25		TNRC18..84629.	0.0236186	0.0273709	0.0288153	0.125047	0.0131661	0.0300063	0.0227611	0.188428	0.00151708	0.0116563	0.059961	0.163396	0.00327295
UID1504	TNRC18..84629./980	980	980-SECPDFVEGPEPRVDSPGRTEPCTAALDLGV	84629	TNRC18	0.106287	0.292408	0.00427723	0.110933	-0.0817709	0.0384472	0.220789	0.161564	0.235912	-0.228939	-0.0211253	-0.425798	0.248244	0.221771	0.418351	-0.497044	-0.129628	-0.367861	-0.0469281	-0.299394	NA	-0.0270061	-0.145796	0.293871	0.169289	0.192593	0.369891	-0.0724888	27		TNRC18..84629.	0.0236186	0.0273709	0.0288153	0.125047	0.0131661	0.0300063	0.0227611	0.188428	0.00151708	0.0116563	0.059961	0.163396	0.00327295
UID1508	ABCC3..8714./982	982	982-EGAEDKEALLIEDTLSNHTDLTDNDPVTYVV	8714	ABCC3	-0.59786	-0.561991	0.900489	-0.156808	-0.435935	-0.307449	0.71333	1.51196	0.918503	0.175474	0.403447	-0.252667	0.0542081	0.309661	1.8365	-0.322357	-0.664887	-0.387155	0.220978	-0.34327	0.921274	1.00802	0.377903	0.0245495	-0.321876	1.16532	0.430345	0.776375	28		ABCC3..8714.	0.172607	0.170409	0.0296986	0.130301	0.0346842	0.0905473	0.0925113	0.0280234	0.0354197	0.0118041	0.00521406	0.0138999	0.0149717
UID1509	ABCC3..8714./983	983	983-QTARHKASAAPGKNASGEDEVLLGARPRPRK	8714	ABCC3	-1.0138	-0.860703	0.319608	-0.590309	-0.802189	-0.971658	-0.655785	1.12175	0.235756	-0.468213	-0.26022	-1.18906	-0.440339	0.0240645	0.987118	-1.0454	-1.18176	-0.191387	-0.545714	-1.34457	0.695781	0.52323	-0.681467	-0.64945	-0.96847	0.00768614	0.0532231	-0.317783	28		ABCC3..8714.	0.172607	0.170409	0.0296986	0.130301	0.0346842	0.0905473	0.0925113	0.0280234	0.0354197	0.0118041	0.00521406	0.0138999	0.0149717
UID1510	ABCC3..8714./984	984	984-DPVTYVVQKQFMRQLSALSSDGEGQGRPVPR	8714	ABCC3	NA	-0.436836	1.1159	-0.359371	-0.611736	-0.401527	-0.100843	1.10048	0.428972	-0.0879581	-0.151653	-0.931499	-0.177121	-0.395187	1.54125	-0.899012	-0.49392	-0.428901	-0.208495	-0.691775	NA	0.634012	0.00533509	-0.325939	-0.263397	0.378159	NA	-0.0268434	25		ABCC3..8714.	0.172607	0.170409	0.0296986	0.130301	0.0346842	0.0905473	0.0925113	0.0280234	0.0354197	0.0118041	0.00521406	0.0138999	0.0149717
UID1511	ABCC3..8714./985	985	985-TYVVQKQFMRQLSALSSDGEGQGRPVPRRHL	8714	ABCC3	-0.325173	0.00454783	2.10875	-0.0680206	0.153283	-0.230595	0.602358	1.274	1.09835	0.289824	0.39871	-0.576628	0.235191	-0.0240526	2.63174	-0.351076	-0.731397	-0.260657	0.188443	-0.632828	0.845753	1.05791	0.222117	-0.0156908	-0.360797	0.976071	0.590323	0.36568	28		ABCC3..8714.	0.172607	0.170409	0.0296986	0.130301	0.0346842	0.0905473	0.0925113	0.0280234	0.0354197	0.0118041	0.00521406	0.0138999	0.0149717
UID1514	ABCC4..10257./987	987	987-FLLLDEISQRNRQLPSDGKKMVHVQDFTAFW	10257	ABCC4	0.475238	-1.02897	-1.38933	-0.339495	-0.265429	0.690185	-1.57246	-0.243586	-0.301869	-0.00700498	-0.727806	1.56703	-0.828458	0.265368	-1.44924	0.156366	0.0320382	0.0768511	-0.797857	0.287644	NA	-0.138138	-1.26628	-0.0727239	0.00758696	-0.262897	0.138804	-0.293552	27		ABCC4..10257.	0.00624	0.0155	0.00593	0.0167	0.00447	0.00311	0.00977	0.00216	0.0102	0.00303	0.0148	0.00947	0.00122
UID1515	ABCC4..10257./988	988	988-QPPVPGTPTLRNRTFSESSVWSQQSSRPSLK	10257	ABCC4	1.20543	-0.599166	-0.223238	-0.762499	-0.0801519	0.175589	-0.676175	0.177169	-0.00294987	0.14188	-0.373782	-0.12173	-0.305279	-0.057792	-1.13126	-0.191033	-0.213545	0.0728065	-0.43829	-0.0772023	-0.254641	-0.0407629	-0.401119	-0.135953	0.182027	-0.432329	0.490851	-0.880905	28		ABCC4..10257.	0.00624	0.0155	0.00593	0.0167	0.00447	0.00311	0.00977	0.00216	0.0102	0.00303	0.0148	0.00947	0.00122
UID1520	ABCC4..10257./991	991	991-TFSESSVWSQQSSRPSLKDGALESQDTENVP	10257	ABCC4	0.346132	-1.10039	-0.816544	-0.783196	-0.469735	0.772044	-0.744861	-0.225995	-0.587982	-0.25883	-0.544813	0.356883	-0.46868	-0.0797679	-1.88319	-0.539909	0.406054	-0.0951234	-0.355666	-0.724982	0.169651	-0.537091	-0.740016	-0.166009	0.408366	-0.494091	0.602879	-0.643479	28		ABCC4..10257.	0.00624	0.0155	0.00593	0.0167	0.00447	0.00311	0.00977	0.00216	0.0102	0.00303	0.0148	0.00947	0.00122
UID1521	POLR1G..10849./992	992	992-AVNGHGALEVDMALGSPEMDVRKKKKKKNQQ	10849	POLR1G	-0.09834	-0.0172381	0.355405	NA	0.168389	NA	NA	NA	NA	-0.0907214	-0.333964	NA	NA	0.0638742	-0.00358868	0.253018	-0.355431	-0.104135	0.082119	NA	0.167568	0.289126	-0.109445	NA	NA	0.0385408	0.438014	NA	17		POLR1G..10849.	0.517716	0.175881	0.523445	0.845263	0.772747	0.53648	0.685006	0.63188	0.310865	0.612753	0.0987497	0.0918441	0.402634
UID1523	POLR1G..10849./994	994	994-ARFSCPPNFTAKPPASESPRFSLEALTGPDT	10849	POLR1G	0.227582	0.207816	-0.130936	0.0821017	0.0860246	0.713967	0.701051	0.431612	0.442075	-0.0715617	-0.0512827	0.0186351	0.279241	0.257632	0.162049	0.445232	0.140065	-0.0376617	0.286589	-0.0628419	0.239965	-0.0893329	-0.241336	-0.0818488	0.0850315	-0.0174503	0.0637755	0.122449	28		POLR1G..10849.	0.517716	0.175881	0.523445	0.845263	0.772747	0.53648	0.685006	0.63188	0.310865	0.612753	0.0987497	0.0918441	0.402634
UID1524	POLR1G..10849./995	995	995-FSCPPNFTAKPPASESPRFSLEALTGPDTEL	10849	POLR1G	0.198884	0.382137	-0.244122	0.0137849	-0.0191727	0.852308	0.471232	0.438622	0.668766	-0.201389	0.0265485	-0.201522	0.0988118	0.281793	-0.0861444	0.116535	-0.27098	0.0958428	0.22706	-0.135128	0.199553	-0.500986	-0.269287	-0.188426	-0.334525	-0.216143	0.0558581	0.178047	28		POLR1G..10849.	0.517716	0.175881	0.523445	0.845263	0.772747	0.53648	0.685006	0.63188	0.310865	0.612753	0.0987497	0.0918441	0.402634
UID1526	POLR1G..10849./997	997	997-PQGTLRILEGPQQSLSGSPLQPIPASPPPQI	10849	POLR1G	NA	NA	NA	0.000972748	-0.177228	-0.053844	NA	0.432977	-0.184659	-0.49105	NA	-0.274076	0.0356932	0.379302	-0.456126	-0.133539	NA	-0.531926	NA	0.182725	NA	-0.103079	NA	-0.374912	-0.21017	-0.185058	NA	-0.262348	18		POLR1G..10849.	0.517716	0.175881	0.523445	0.845263	0.772747	0.53648	0.685006	0.63188	0.310865	0.612753	0.0987497	0.0918441	0.402634
UID1527	POLR1G..10849./998	998	998-GTLRILEGPQQSLSGSPLQPIPASPPPQIPP	10849	POLR1G	-0.364293	0.435016	-0.444727	-0.0187761	-0.0338415	0.675646	0.197233	0.0838582	-0.172293	-0.722707	-0.0569329	0.00349903	-0.0940479	0.356637	-0.281063	0.298111	-0.272469	-0.0205003	0.254111	0.0877693	-0.431614	-0.270659	-0.0289569	0.0385373	-0.246377	-0.0100549	-0.0888734	-0.427628	28		POLR1G..10849.	0.517716	0.175881	0.523445	0.845263	0.772747	0.53648	0.685006	0.63188	0.310865	0.612753	0.0987497	0.0918441	0.402634
UID1528	POLR1G..10849./999	999	999-PQQSLSGSPLQPIPASPPPQIPPGLRPRFCA	10849	POLR1G	1.15254	-0.20012	-0.293696	-0.816854	0.762753	0.524375	0.587056	0.736997	0.468548	0.143318	0.468601	0.510212	0.312711	0.0471446	0.145918	0.466824	-0.811106	0.064638	-0.0153786	-0.328983	0.452983	0.00572554	-0.15639	-0.203171	-0.088974	0.0159461	0.265836	-0.402132	28		POLR1G..10849.	0.517716	0.175881	0.523445	0.845263	0.772747	0.53648	0.685006	0.63188	0.310865	0.612753	0.0987497	0.0918441	0.402634
UID1529	POLR1G..10849./1000	1000	1000-TVPQEEMPGPPLNSESGEEAPTGRDKKRKQQ	10849	POLR1G	-0.0732663	-0.0627337	0.0667766	0.149068	0.126364	0.00712657	0.0514927	0.184187	0.134988	-0.0737197	-0.0259402	0.198389	-0.0206671	0.117352	0.119448	-0.13472	-0.239545	-0.127783	-0.012526	0.063745	0.154597	-0.00554878	-0.0348861	0.326913	0.402236	0.0573916	0.0249689	-0.0269289	28		POLR1G..10849.	0.517716	0.175881	0.523445	0.845263	0.772747	0.53648	0.685006	0.63188	0.310865	0.612753	0.0987497	0.0918441	0.402634
UID1530	POLR1G..10849./1001	1001	1001-KQEQINTEPLEDTVLSPTKKRKRQKGTEGME	10849	POLR1G	0.0829317	0.857267	-0.510495	0.308725	0.00130272	0.31145	0.0153837	-0.168981	-0.174653	-0.270414	-0.168343	0.312998	-0.263911	0.582961	-0.574977	0.351695	-0.649422	0.000270367	0.0774603	-0.246598	-0.311113	-0.0653989	-0.138171	0.26846	-0.103065	0.152597	-0.26468	0.117323	28		POLR1G..10849.	0.517716	0.175881	0.523445	0.845263	0.772747	0.53648	0.685006	0.63188	0.310865	0.612753	0.0987497	0.0918441	0.402634
UID1532	POLR1G..10849./1003	1003	1003-PVTGPRSALAPNLLTSGKKKKEMQVTEAPVT	10849	POLR1G	0.00781647	0.109921	-0.587234	-0.393225	-0.410126	0.406743	-0.234891	-0.0485868	-0.286814	-1.28708	-0.585115	0.193517	-0.495578	-0.0867144	-0.846552	0.224302	-0.308945	-0.0635486	0.129703	-0.34182	-0.635835	-0.725977	-0.822238	-0.322803	-0.144594	-0.366268	-0.730214	-0.143928	28		POLR1G..10849.	0.517716	0.175881	0.523445	0.845263	0.772747	0.53648	0.685006	0.63188	0.310865	0.612753	0.0987497	0.0918441	0.402634
UID1537	NUP42..11097./1006	1006	1006-RKEGFGLSENPFASLSPDEQKDEKKLLEGIV	11097	NUP42	-0.239903	-0.403271	-0.711949	-0.305367	-0.570966	0.0609787	0.301897	-0.14508	-0.170706	-1.18429	-0.606739	-0.279874	-0.678599	0.569685	-0.643231	0.380422	-0.190281	-1.56493	0.302677	0.0889454	-1.24536	-0.487524	-0.934424	-0.314283	0.535648	-0.224306	-0.885169	-0.198487	28		NUP42..11097.	0.0827679	0.0645071	0.444397	0.00339378	0.170117	0.00644461	0.0612143	0.0331892	0.162215	0.0943809	0.0169791	0.152492	0.00760882
UID1540	NUP42..11097./1007	1007	1007-AASFSFKSPAASSFGSPGFSGLPASLATGPV	11097	NUP42	NA	NA	NA	-0.265197	-0.0062561	-0.192211	NA	-0.343637	-0.0231521	-0.308021	NA	0.00969028	-0.22131	0.308186	-0.0759115	0.119071	NA	0.0108562	NA	0.186271	NA	-0.101094	NA	-0.327485	0.00150394	0.291755	NA	-0.0572297	18		NUP42..11097.	0.0827679	0.0645071	0.444397	0.00339378	0.170117	0.00644461	0.0612143	0.0331892	0.162215	0.0943809	0.0169791	0.152492	0.00760882
UID1541	ARPC5..10092./1008	1008	1008-PPINTKSQAVKDRAGSIVLKVLISFKANDIE	10092	ARPC5	0.830337	0.0551054	0.027504	-0.157387	-0.317429	-0.295507	0.0525093	0.401834	0.561074	0.828698	0.0524068	0.837535	0.406431	-0.357273	0.181864	1.70517	0.111908	0.727739	0.51062	0.0352266	NA	0.743769	0.316902	-0.277799	-0.648884	-0.065375	0.0541801	0.356951	27		ARPC5..10092.	0.558	0.0431	0.319	0.113	0.0618	0.228	0.258	0.0977	0.17	0.0548	0.0501	0.164	0.141
UID1543	MAFG..4097./1009	1009	1009-SKYEALQTFARTVARSPVAPARGPLAAGLGP	4097	MAFG	-0.662627	-0.250248	-0.130969	-0.773589	0.000938416	-0.0807687	-0.571522	-0.360108	-0.234956	-0.408027	-0.452254	-0.38308	-0.348995	-0.407708	-0.345886	0.0270138	-0.178531	0.0764	-0.473842	-0.192554	-0.705469	-0.233469	-0.43549	-0.386997	0.0637131	-0.405156	-0.992322	-0.278267	28		MAFG..4097.	0.215467	0.354271	0.366905	0.129816	0.0462531	0.11703	0.0156518	0.0613307	0.246357	0.0435394	0.0569468	0.251631	0.0221821
UID1544	PDPK1..5170./1010	1010	1010-TAKVLSPESKQARANSFVGTAQYVSPELLTE	5170	PDPK1	0.25114	0.0743343	0.574995	0.310572	-0.0129706	0.306913	0.387158	0.527668	-0.00164843	-0.067822	0.692256	0.00534534	-0.045598	0.102444	0.183363	0.369467	0.322971	0.295081	0.242764	-0.222027	0.371943	0.579937	0.386588	0.455783	0.131495	0.227095	-0.0163719	0.127573	28		PDPK1..5170.	0.818373	0.835054	0.953476	0.956278	0.844922	0.965828	0.948566	0.938702	0.989394	0.971251	0.851371	0.86966	0.946757
UID1548	PDPK1..5170./1011	1011	1011-DAVPIQSSVVLCSCPSPSMVRTQTESSTPPG	5170	PDPK1	0.067258	0.160696	0.210404	0.316111	-0.0417054	0.242308	0.112855	0.212169	0.0844251	0.226089	0.353324	0.0715618	0.199324	0.330786	0.239495	-0.0043602	0.021867	0.0370326	0.135695	0.316743	0.254832	0.199655	0.174452	0.583068	0.122854	0.3287	0.363722	0.173151	28		PDPK1..5170.	0.818373	0.835054	0.953476	0.956278	0.844922	0.965828	0.948566	0.938702	0.989394	0.971251	0.851371	0.86966	0.946757
UID1549	PER1..5187./1012	1012	1012-LPATGTFKAKALPCQSPDPELEAGSAPVQAP	5187	PER1	-0.239482	-0.0551138	-0.343041	-0.154439	-0.00749111	-0.0864382	NA	0.212633	0.351289	0.111185	NA	NA	0.320205	-0.142995	NA	NA	NA	0.119763	NA	NA	-0.293618	-0.16989	NA	-0.200902	NA	NA	-0.469635	0.481768	17		PER1..5187.	0.022215	0.00874169	0.00289802	0.00974151	0.00988422	0.0288178	0.0215864	0.0049812	0.00642796	0.00364095	0.0236014	0.032166	0.00819761
UID1553	PER1..5187./1014	1014	1014-PVSVGTKKDPPSAALSGEGATPRKEPVVGGT	5187	PER1	-0.233755	-0.233427	NA	-0.208946	NA	-0.347782	-0.864196	-0.0639153	0.0410619	0.473707	0.144353	-0.491216	-0.304573	0.195143	0.282763	-0.391512	-0.0306644	-0.0685649	-0.182612	-0.174564	NA	NA	-0.163373	-0.170406	-0.152657	-0.0386171	-0.00537395	-0.0712204	24		PER1..5187.	0.022215	0.00874169	0.00289802	0.00974151	0.00988422	0.0288178	0.0215864	0.0049812	0.00642796	0.00364095	0.0236014	0.032166	0.00819761
UID1554	PER1..5187./1015	1015	1015-EGATPRKEPVVGGTLSPLALANKAESVVSVT	5187	PER1	-0.57492	-0.946281	-0.537642	-0.585106	0.459622	-0.623222	-0.905977	-0.736884	-0.413619	0.0704506	-0.512156	-0.861391	-0.560864	-0.0566667	-0.041543	-0.789563	-0.589259	-0.388874	-0.789124	-0.789004	-0.687969	-0.423934	-0.913205	-0.707046	-0.604784	-0.677774	-0.724072	-0.823715	28		PER1..5187.	0.022215	0.00874169	0.00289802	0.00974151	0.00988422	0.0288178	0.0215864	0.0049812	0.00642796	0.00364095	0.0236014	0.032166	0.00819761
UID1558	RNF113A..7737./1017	1017	1017-EGRYGVYEDENYEVGSDDEEIPFKCFICRQS	7737	RNF113A	-0.862389	-0.112274	0.0727533	-0.147698	-0.572912	-0.0905725	0.291849	0.122389	-0.0315245	-0.598268	0.311106	1.07949	-0.0504897	0.197309	0.139682	-0.154132	-0.0593861	0.180401	0.65149	0.22223	0.649794	-0.0169172	-0.36351	0.112494	0.814512	0.176117	-0.0775819	0.974063	28		RNF113A..7737.	0.943406	0.982408	0.943891	0.974557	0.954483	0.997165	0.935113	0.969681	0.960319	0.977177	0.914753	0.998848	0.918647
UID1559	KDM6A..7403./1018	1018	1018-MTADAVCSPSHGDSKSPGLLSSDNPQLSALL	7403	KDM6A	0.548985	0.415794	-0.261045	0.204962	-0.913043	-1.26996	0.148097	0.418892	0.72974	-0.701498	0.184206	-0.177668	-1.47227	-0.194454	-0.400568	-0.484301	0.253762	-0.146564	0.261853	-1.29373	0.0274843	0.299418	0.739872	-0.741728	0.63636	-0.116325	1.1117	0.578127	28		KDM6A..7403.	0.104531	0.0184429	0.0149596	0.0561175	0.0201351	0.0195881	0.00805888	0.00507539	0.0296832	0.00337392	0.0145988	0.0270847	0.00742791
UID1563	KDM6A..7403./1019	1019	1019-SVASSPSSAISTATPSPKSTEQTTTNSVTSL	7403	KDM6A	-0.938212	0.110698	0.884559	-0.692063	0.540226	-1.02645	-1.43516	-0.947323	-0.583114	-0.243739	NA	-1.36919	-1.04964	-0.58684	-0.120468	-1.34653	NA	0.072557	NA	-0.714506	0.0165319	-0.22484	NA	-0.376874	-0.308785	0.183133	-0.286906	-0.838578	24		KDM6A..7403.	0.104531	0.0184429	0.0149596	0.0561175	0.0201351	0.0195881	0.00805888	0.00507539	0.0296832	0.00337392	0.0145988	0.0270847	0.00742791
UID1564	CLDN3..1365./1020	1020	1020-EKKYTATKVVYSAPRSTGPGASLGTGYDRKD	1365	CLDN3	-0.128741	0.263971	-0.190111	-0.140863	-0.0386836	0.642793	1.34806	-0.0357491	0.83063	1.04652	0.321575	-0.480077	0.418935	-0.0613753	3.03097	-0.394642	-0.122152	1.41992	1.47411	-0.427131	0.614587	2.41416	1.3203	-0.221013	-0.471519	1.53816	1.51485	1.27508	28		CLDN3..1365.	0.00527501	0.0188092	0.00527942	0.00427204	0.0166894	0.0258715	0.0135332	0.0025345	0.0139607	0.00977598	0.065187	0.0126438	0.0277352
UID1565	CLDN3..1365./1021	1021	1021-TKVVYSAPRSTGPGASLGTGYDRKDYV____	1365	CLDN3	-0.535303	0.558393	0.185116	-0.248102	-0.260373	0.325137	0.845589	0.361727	1.13819	0.197903	0.533707	-0.642371	0.219003	-0.0770715	1.97087	-0.405112	-0.191398	0.717523	0.8509	-0.614728	1.53049	1.84141	1.3518	-0.642503	-0.468098	0.507281	1.06827	1.59143	28		CLDN3..1365.	0.00527501	0.0188092	0.00527942	0.00427204	0.0166894	0.0258715	0.0135332	0.0025345	0.0139607	0.00977598	0.065187	0.0126438	0.0277352
UID1566	CLDN3..1365./1022	1022	1022-CPPREKKYTATKVVYSAPRSTGPGASLGTGY	1365	CLDN3	-0.221165	-0.109949	-0.318846	-0.747275	-0.850388	1.70404	2.38189	0.0640198	2.36505	1.4678	0.705305	-0.385836	0.648867	-0.199807	4.21237	-0.592777	-0.881357	2.24622	3.02885	-2.17212	0.671437	4.34729	3.04437	0.164421	-2.48043	2.08667	2.71894	2.83138	28		CLDN3..1365.	0.00527501	0.0188092	0.00527942	0.00427204	0.0166894	0.0258715	0.0135332	0.0025345	0.0139607	0.00977598	0.065187	0.0126438	0.0277352
UID1571	ZZEF1..23140./1027	1027	1027-GDVLAASEEEKAPIQSPKGVEAAKELYTHLC	23140	ZZEF1	-0.219207	-0.304241	0.264189	0.0120838	0.0932593	-0.0114117	0.349962	-0.169122	0.376611	0.125668	-0.0387135	0.18488	-0.198741	-0.0543194	0.20619	0.149103	0.273067	-0.184309	-0.147877	0.32545	0.311085	0.317392	0.156172	-0.177993	0.363719	-0.188093	0.228375	0.289712	28		ZZEF1..23140.	0.0584024	0.0684293	0.0327931	0.158992	0.0630594	0.155268	0.0426842	0.0935541	0.477535	0.0358687	0.00480218	0.0202522	0.0194638
UID1572	ZZEF1..23140./1028	1028	1028-LDERGDREEEVERPVSSPGDPEQKKLDPLEG	23140	ZZEF1	-0.402843	-0.0400729	-0.0659653	0.762001	-0.0467362	-0.302586	0.554781	-0.292594	0.200709	-0.438802	-0.142201	0.499998	-0.0129676	0.389732	0.385615	0.301032	-0.390412	-0.173406	-0.597423	0.718456	0.415079	-0.0517106	0.0395267	-0.0998592	0.945958	-0.00942326	0.965584	NA	27		ZZEF1..23140.	0.0584024	0.0684293	0.0327931	0.158992	0.0630594	0.155268	0.0426842	0.0935541	0.477535	0.0358687	0.00480218	0.0202522	0.0194638
UID1573	ZZEF1..23140./1029	1029	1029-DERGDREEEVERPVSSPGDPEQKKLDPLEGL	23140	ZZEF1	-0.822795	-0.619563	-0.238767	0.284523	-0.302951	0.00736475	0.475701	-0.49325	0.521571	-1.2174	-0.238697	-0.197458	-0.232172	-0.0299126	0.178187	0.36917	-0.695845	-0.278702	-0.524419	-0.0816852	0.0708351	-0.329588	-0.100125	-0.605699	0.276477	-0.631313	0.666245	0.0590426	28		ZZEF1..23140.	0.0584024	0.0684293	0.0327931	0.158992	0.0630594	0.155268	0.0426842	0.0935541	0.477535	0.0358687	0.00480218	0.0202522	0.0194638
UID1574	ZZEF1..23140./1030	1030	1030-LPAADVSPATAEEPLSPSTPTRRPPFTRGRL	23140	ZZEF1	-0.3894	-0.0318511	0.807939	0.106241	0.346391	0.10862	0.219861	-0.0326834	0.137473	0.0829754	0.0355949	-0.27563	-0.193324	0.0129595	0.28316	-0.0800662	0.128905	NA	-0.784099	0.254457	0.286854	0.144303	0.277364	0.116185	0.488747	-0.0537257	0.28238	0.0926952	27		ZZEF1..23140.	0.0584024	0.0684293	0.0327931	0.158992	0.0630594	0.155268	0.0426842	0.0935541	0.477535	0.0358687	0.00480218	0.0202522	0.0194638
UID1584	ASAP2..8853./1033	1033	1033-HVEYEWRLLHEDLDESDDDMDEKLQPSPNRR	8853	ASAP2	0.0522716	-0.498667	0.919388	0.571807	0.573379	-0.121851	0.216851	1.92537	0.448379	0.269823	0.45448	0.932005	0.133756	0.205364	0.561995	0.599588	0.435429	1.21268	0.311339	0.703969	0.713867	0.846629	0.202918	0.418846	0.421614	0.0335569	2.09667	0.540028	28		ASAP2..8853.	0.00820924	0.0108346	0.00130253	0.00592762	0.0023986	0.0039603	0.00876128	0.0106116	0.0351664	0.00871089	0.00348436	0.0248656	0.00437455
UID1585	ASAP2..8853./1034	1034	1034-DLDESDDDMDEKLQPSPNRREDRPISFYQLG	8853	ASAP2	-0.577242	-0.596487	-0.406826	-0.305661	-0.659627	-0.540129	-0.451044	0.422888	-0.00584586	-0.160386	-0.289465	0.267105	-0.393861	-1.23822	-0.075024	-0.351127	0.213123	0.650766	0.145418	-0.322892	-0.508149	0.338052	-0.459274	0.151859	-0.473866	0.27639	-0.175412	-0.0861772	28		ASAP2..8853.	0.00820924	0.0108346	0.00130253	0.00592762	0.0023986	0.0039603	0.00876128	0.0106116	0.0351664	0.00871089	0.00348436	0.0248656	0.00437455
UID1589	TET3..200424./1035	1035	1035-KAENPLTPTLSGFLESPLKYLDTPTKSLLDT	200424	TET3	NA	0.0407925	-0.0976076	1.05174	-0.399507	0.0986195	NA	NA	-0.473174	-0.020927	0.000562668	0.93412	NA	NA	-0.54222	-0.434406	0.195641	-0.015852	0.286633	-0.683503	NA	-0.401337	-0.494357	-0.84588	-0.494408	0.399551	NA	-0.284234	21		TET3..200424.	0.108812	0.0199611	0.0179779	0.020183	0.0222882	0.0812603	0.0712788	0.1414	0.0294429	0.0210185	0.0335209	0.161872	0.0198436
UID1591	TET3..200424./1037	1037	1037-SRDSLLPPTQEMRSPSPMTALQPGSTGPLPP	200424	TET3	0.711373	0.34077	-0.0985956	NA	-0.456593	NA	-0.286537	NA	NA	-0.235139	-0.177576	0.0838032	NA	NA	-0.166463	-0.316397	0.289642	-0.246655	-0.498425	0.0289483	NA	NA	-0.171253	NA	-0.0207596	0.158264	-0.298916	NA	18		TET3..200424.	0.108812	0.0199611	0.0179779	0.020183	0.0222882	0.0812603	0.0712788	0.1414	0.0294429	0.0210185	0.0335209	0.161872	0.0198436
UID1592	TTI1..9675./1038	1038	1038-KIVEERRWNSDDLNASPKTSATQPWNRIQRR	9675	TTI1	0.467064	-0.546453	-0.0158615	-0.100952	-0.155962	-0.292259	0.124168	0.0502214	-0.622399	-0.287382	-0.114672	-0.316603	-0.296785	0.110001	-0.483672	-0.0588398	0.257466	0.0261574	0.0578861	0.467894	0.47114	-0.690437	-0.36951	-0.16622	0.186181	-0.0681081	-0.10345	-0.470619	28		TTI1..9675.	0.931971	0.218665	0.91592	0.928576	0.815553	0.912802	0.862056	0.934519	0.902418	0.971933	0.86495	0.718597	0.845406
UID1597	RRP8..23378./1039	1039	1039-GSTTNDPPKQSPGSTSPKPPHTLSRKQWRNR	23378	RRP8	-0.082135	0.263824	0.445869	-0.381124	-0.683904	0.0814583	0.434325	0.161026	0.600585	0.135784	0.450678	-0.725299	-0.0442368	-0.113111	0.109049	0.481704	0.380182	0.374569	-0.0323054	0.147951	0.148909	-0.521482	0.408195	-0.369897	0.304201	-0.268281	0.158599	0.198192	28		RRP8..23378.	0.0338826	0.0191814	0.0886724	0.0210242	0.0063517	0.0414345	0.0326027	0.057159	0.0181927	0.00377466	0.0125703	0.064601	0.12871
UID1601	RRP8..23378./1040	1040	1040-PDQAPAEAPTEKTEVSPVPRTDSHEARAGAL	23378	RRP8	0.111547	-0.345242	-0.0952326	-0.452192	-0.972583	0.128115	0.192266	-0.0289412	0.18286	-0.22806	-0.00709772	-0.542693	-0.150826	-0.180506	-0.293815	0.282532	-0.467152	-0.0156824	-0.0491139	0.240301	-0.194223	-0.634831	-0.289755	-0.252399	0.257207	-0.32195	-0.473578	0.211611	28		RRP8..23378.	0.0338826	0.0191814	0.0886724	0.0210242	0.0063517	0.0414345	0.0326027	0.057159	0.0181927	0.00377466	0.0125703	0.064601	0.12871
UID1602	PJA2..9867./1041	1041	1041-VFELENREAEAYTGLSPPVPSFNCEVRDEFE	9867	PJA2	-0.122924	-0.134454	-0.208309	0.322998	-0.18749	-0.194231	-0.0549809	-0.252636	-0.278414	0.0421821	-0.209063	0.0330334	0.00105381	-0.060497	0.0364583	0.457231	0.385844	-0.0582925	-0.162012	0.107558	0.232969	-0.389904	-0.0163019	0.0500037	0.140979	0.184186	-0.192888	0.0817445	28		PJA2..9867.	0.0677	0.0246	0.067	0.0344	0.0598	0.0178	0.0121	0.0289	0.0123	0.0067	0.0115	0.114	0.0471
UID1607	SIPA1L1..26037./1042	1042	1042-SIYNSQREHFFTSRASLLDQALPNDVLFSST	26037	SIPA1L1	-0.470106	-0.434632	-0.0778747	-0.490543	-0.293267	0.337039	0.57183	0.532922	0.15402	0.391128	0.113754	0.937917	-0.229936	-0.534281	-0.138422	-0.0981483	0.806805	-0.742353	0.0539026	0.410061	0.370319	0.545501	-0.604469	0.546048	-0.250694	-0.253226	-0.557849	-0.222821	28		SIPA1L1..26037.	0.0303822	0.0498433	0.00196521	0.00290872	0.0113019	0.0212504	0.00241443	0.0121196	0.00645045	0.0334885	0.00909216	0.0124109	0.0142576
UID1608	SIPA1L1..26037./1043	1043	1043-DQALPNDVLFSSTYPSLPKSLPLRRPSYTLG	26037	SIPA1L1	-0.295015	-0.180324	0.611352	-0.354191	0.0219781	-0.178065	-0.0154025	0.214892	-0.200351	-0.391774	0.0133618	0.155443	0.276124	-0.291313	-0.254125	0.782801	-0.504778	-0.296347	-0.210101	-0.0722108	-0.247717	0.362844	-0.362084	-0.0727011	-0.404326	-0.444429	-0.240109	-0.310998	28		SIPA1L1..26037.	0.0303822	0.0498433	0.00196521	0.00290872	0.0113019	0.0212504	0.00241443	0.0121196	0.00645045	0.0334885	0.00909216	0.0124109	0.0142576
UID1609	SIPA1L1..26037./1044	1044	1044-IAHTRLRASTRDLRASPKPTSKSTIEEDLKK	26037	SIPA1L1	-0.431383	-0.115587	-0.154426	-0.0137474	-0.0813249	0.0724638	0.315567	-0.557143	-0.0691539	-0.564799	-0.394281	-0.199996	-0.106952	-0.510619	-0.0136207	-0.363334	0.168155	-0.912219	-0.58957	0.394627	-0.738349	0.894794	-0.477528	1.0066	-0.560793	-0.249709	-0.273385	-0.440413	28		SIPA1L1..26037.	0.0303822	0.0498433	0.00196521	0.00290872	0.0113019	0.0212504	0.00241443	0.0121196	0.00645045	0.0334885	0.00909216	0.0124109	0.0142576
UID1611	SIPA1L1..26037./1045	1045	1045-DQALAQMKPYSSKDSSPTLASKVDQLEGMLK	26037	SIPA1L1	0.10526	-0.124796	-0.110127	0.0729558	-0.237482	0.287452	1.06441	-0.29763	-0.0461102	-0.123201	-0.221108	0.821757	0.486681	0.186227	0.359238	-0.0815544	0.293543	-0.673422	-0.470096	0.89336	0.0578019	0.270694	-0.75528	1.11349	-0.191422	-0.0345049	0.194136	-0.0340757	28		SIPA1L1..26037.	0.0303822	0.0498433	0.00196521	0.00290872	0.0113019	0.0212504	0.00241443	0.0121196	0.00645045	0.0334885	0.00909216	0.0124109	0.0142576
UID1616	SIPA1L1..26037./1048	1048	1048-SPTYKTGPSLHREYGSTSSIDKQGTSGESFF	26037	SIPA1L1	-0.133718	-0.131033	0.103253	0.298656	0.161537	0.154671	NA	-0.510589	0.478932	0.196194	NA	1.03421	0.237898	-0.0187702	0.509621	0.282791	NA	-0.485293	NA	0.813788	0.224559	0.625005	NA	1.06725	-0.5802	-0.493903	0.0774446	0.0295118	23		SIPA1L1..26037.	0.0303822	0.0498433	0.00196521	0.00290872	0.0113019	0.0212504	0.00241443	0.0121196	0.00645045	0.0334885	0.00909216	0.0124109	0.0142576
UID1618	SIPA1L1..26037./1049	1049	1049-YKTGPSLHREYGSTSSIDKQGTSGESFFDLL	26037	SIPA1L1	NA	NA	NA	-0.289028	-0.252704	0.0298257	NA	-0.208849	0.0494115	-0.365836	NA	0.448225	0.253056	-0.2745	0.059124	0.0413761	NA	-0.151455	NA	0.194175	NA	1.00224	NA	0.298789	-0.0557709	0.0188913	NA	-0.187509	18		SIPA1L1..26037.	0.0303822	0.0498433	0.00196521	0.00290872	0.0113019	0.0212504	0.00241443	0.0121196	0.00645045	0.0334885	0.00909216	0.0124109	0.0142576
UID1621	SIPA1L1..26037./1050	1050	1050-SENMDSRFLMPEAYPSSPRKALRRIRQRSNS	26037	SIPA1L1	NA	0.201354	-0.16888	0.00296164	0.0615487	-0.131999	-0.01964	-0.00558519	-0.0230447	0.319915	-0.331163	-0.597248	-9.60827e-05	0.664416	-0.0601082	0.0229068	0.0123708	-0.00819476	-0.205929	0.136477	NA	0.243589	-0.114665	0.619419	-0.449018	0.0383101	NA	0.159945	25		SIPA1L1..26037.	0.0303822	0.0498433	0.00196521	0.00290872	0.0113019	0.0212504	0.00241443	0.0121196	0.00645045	0.0334885	0.00909216	0.0124109	0.0142576
UID1622	SIPA1L1..26037./1051	1051	1051-ENMDSRFLMPEAYPSSPRKALRRIRQRSNSD	26037	SIPA1L1	0.113928	0.136711	0.0512079	-0.0555116	-0.0401014	-0.19371	-0.0476484	-0.203275	0.00647275	-0.201922	0.0166408	0.65501	-0.0549819	-0.289164	0.1457	0.208726	0.418908	-0.0824342	-0.129026	0.459626	-0.25643	0.353229	-0.062901	0.250553	-0.182448	0.0971963	0.103968	0.0185245	28		SIPA1L1..26037.	0.0303822	0.0498433	0.00196521	0.00290872	0.0113019	0.0212504	0.00241443	0.0121196	0.00645045	0.0334885	0.00909216	0.0124109	0.0142576
UID1624	SIPA1L1..26037./1052	1052	1052-FRKLRNAKGEELGKSSDLEDNRSEDSVRPWT	26037	SIPA1L1	-0.061903	-0.443285	NA	-0.073822	-0.41809	-0.0592928	-0.208488	-0.897761	0.069804	-1.23913	-0.316793	0.451725	0.258858	-0.490486	-0.406572	-0.384469	-0.56002	-1.30687	-0.722547	0.4024	NA	1.09174	-0.710205	0.365465	-0.910543	-0.418565	-0.404464	-0.111764	26		SIPA1L1..26037.	0.0303822	0.0498433	0.00196521	0.00290872	0.0113019	0.0212504	0.00241443	0.0121196	0.00645045	0.0334885	0.00909216	0.0124109	0.0142576
UID1626	SIPA1L1..26037./1053	1053	1053-PTKLSDFLITGGGKGSGFSLDVIDGPISQRE	26037	SIPA1L1	-0.472959	-0.352255	-0.292132	0.142026	0.0417124	-0.0673156	0.325657	-0.115835	0.123758	-0.693005	-0.17609	0.183138	0.0145152	-0.443116	-0.0770388	0.179241	-0.192865	-0.638134	-0.434915	0.25182	-0.47921	0.339805	-0.488215	0.737467	-0.594035	-0.00244713	-0.19958	-0.265686	28		SIPA1L1..26037.	0.0303822	0.0498433	0.00196521	0.00290872	0.0113019	0.0212504	0.00241443	0.0121196	0.00645045	0.0334885	0.00909216	0.0124109	0.0142576
UID1627	SIPA1L1..26037./1054	1054	1054-LSDFLITGGGKGSGFSLDVIDGPISQRENLR	26037	SIPA1L1	NA	-0.344215	-0.440679	NA	0.2453	-0.453032	0.0772419	-0.687144	-0.167689	-0.541874	-0.323108	NA	-0.417942	NA	-0.151814	0.222273	-0.220063	-0.620799	-0.615942	NA	NA	NA	-0.427507	NA	NA	-0.0179844	NA	NA	17		SIPA1L1..26037.	0.0303822	0.0498433	0.00196521	0.00290872	0.0113019	0.0212504	0.00241443	0.0121196	0.00645045	0.0334885	0.00909216	0.0124109	0.0142576
UID1628	SIPA1L1..26037./1055	1055	1055-TINSVGFMDTRKRHQSDGNEIAHTRLRASTR	26037	SIPA1L1	0.659633	0.3819	0.837411	-0.0706904	0.632174	-0.20631	1.30911	-0.408739	0.632587	0.919328	-0.0983529	1.47808	0.642786	0.318307	-0.158788	0.643582	0.937243	-0.833837	0.0581503	1.34855	0.621601	0.960423	-1.51277	1.53317	-0.0973487	-1.00126	-0.0251968	0.201186	28		SIPA1L1..26037.	0.0303822	0.0498433	0.00196521	0.00290872	0.0113019	0.0212504	0.00241443	0.0121196	0.00645045	0.0334885	0.00909216	0.0124109	0.0142576
UID1630	SIPA1L1..26037./1056	1056	1056-DAASHTSTMSSRHSASPVVFTSARSSPKEEL	26037	SIPA1L1	0.241526	0.293734	0.114758	-0.00447989	0.410025	0.406161	0.271648	-0.202879	-0.0944632	-0.235817	-0.0673029	-0.0701036	0.0630782	0.245677	0.359278	0.0630436	0.279348	-0.514598	-0.273381	0.152894	-0.381807	0.484394	-0.0590351	0.499739	-0.234215	-0.0877604	-0.337177	-0.0219606	28		SIPA1L1..26037.	0.0303822	0.0498433	0.00196521	0.00290872	0.0113019	0.0212504	0.00241443	0.0121196	0.00645045	0.0334885	0.00909216	0.0124109	0.0142576
UID1632	SIPA1L1..26037./1057	1057	1057-KSTIEEDLKKLIDLESPTPESQKSFKFHALS	26037	SIPA1L1	0.288474	-0.278083	0.275143	-0.291612	0.220231	-0.0174886	0.78777	-0.456906	0.356114	0.127977	0.104572	0.752122	0.151137	-0.198245	0.224229	0.0882861	0.35918	-0.334508	-0.189626	0.843004	-0.334606	1.24288	-0.633658	0.908482	-0.57582	-0.281657	0.0308057	-0.00585429	28		SIPA1L1..26037.	0.0303822	0.0498433	0.00196521	0.00290872	0.0113019	0.0212504	0.00241443	0.0121196	0.00645045	0.0334885	0.00909216	0.0124109	0.0142576
UID1636	SIPA1L1..26037./1058	1058	1058-PRSISSDGRPLERRLSPGSDIYVTVSSMALA	26037	SIPA1L1	-0.483633	-0.387833	-0.452716	-0.133064	-0.451712	-0.133414	0.0588156	-0.0929114	-0.0907524	-0.546318	-0.467563	0.275081	0.0205539	-0.709682	0.0102326	-0.144953	-0.559917	-0.242988	-0.275009	0.160275	-0.702974	-0.228273	-0.43365	0.0560459	-0.281923	0.12207	-0.458559	-0.107274	28		SIPA1L1..26037.	0.0303822	0.0498433	0.00196521	0.00290872	0.0113019	0.0212504	0.00241443	0.0121196	0.00645045	0.0334885	0.00909216	0.0124109	0.0142576
UID1637	SIPA1L1..26037./1059	1059	1059-VTVSSMALARSQCRNSPSNLSSSSDTGSVGG	26037	SIPA1L1	0.10787	0.270154	0.907922	0.214925	1.09169	0.0837784	NA	-0.0345726	-0.329866	-0.179326	NA	-0.185785	0.0292215	0.528907	0.542643	0.0102253	NA	0.165259	NA	0.0921335	-0.233932	0.800646	NA	0.279459	-0.0506115	0.314738	0.425444	-0.111409	23		SIPA1L1..26037.	0.0303822	0.0498433	0.00196521	0.00290872	0.0113019	0.0212504	0.00241443	0.0121196	0.00645045	0.0334885	0.00909216	0.0124109	0.0142576
UID1639	SIPA1L1..26037./1061	1061	1061-SPSGRLMRQDPVVHLSPNKQGHSDSHYSSHS	26037	SIPA1L1	0.135071	0.212058	-0.460067	-0.0962736	0.0772193	-0.154555	-0.0893809	-1.06446	-0.405023	-0.758378	-0.801571	1.64522	-0.106555	-0.0184596	-0.897603	0.488011	0.27377	-0.854559	-0.256851	0.697134	-1.07304	0.751817	-1.00595	0.85142	-1.2116	0.429647	-0.862237	0.299789	28		SIPA1L1..26037.	0.0303822	0.0498433	0.00196521	0.00290872	0.0113019	0.0212504	0.00241443	0.0121196	0.00645045	0.0334885	0.00909216	0.0124109	0.0142576
UID1640	SIPA1L1..26037./1062	1062	1062-STYPSLPKSLPLRRPSYTLGMKSLHGEFSAS	26037	SIPA1L1	0.87058	-0.946125	-0.11761	-0.308013	0.0246906	-0.0659175	0.562193	-0.232611	0.597529	0.814097	-0.59501	1.51852	0.170311	-0.677942	-0.245664	0.416343	1.61093	-0.436319	-0.384935	1.42068	0.732057	0.867492	-0.891037	0.955533	-0.85404	-0.0606187	0.0575881	-0.085563	28		SIPA1L1..26037.	0.0303822	0.0498433	0.00196521	0.00290872	0.0113019	0.0212504	0.00241443	0.0121196	0.00645045	0.0334885	0.00909216	0.0124109	0.0142576
UID1641	SIPA1L1..26037./1063	1063	1063-YRQKSMPEGFGVSRRSPASIDRQNTQSDIGG	26037	SIPA1L1	-0.926982	-0.117035	-0.451806	0.0550001	0.027228	-0.0112618	-0.0146405	-0.769371	-0.334404	-0.964064	-0.50221	0.145818	0.247687	-0.415513	-0.550007	-0.486801	-0.548556	-1.14818	-0.597438	0.494905	-0.916862	0.581702	-0.770144	0.651321	-0.80525	-0.0524171	-1.21243	-0.370991	28		SIPA1L1..26037.	0.0303822	0.0498433	0.00196521	0.00290872	0.0113019	0.0212504	0.00241443	0.0121196	0.00645045	0.0334885	0.00909216	0.0124109	0.0142576
UID1642	SIPA1L1..26037./1064	1064	1064-RLFKEREKPLKRRSKSETGDSSIFRKLRNAK	26037	SIPA1L1	1.04465	-0.716201	0.0422599	-1.2212	-0.600572	0.496935	0.705016	-0.356953	0.61457	0.782205	-0.33229	0.948947	-0.347622	-0.649032	-0.378093	-0.476898	0.824393	-0.800125	-0.539274	1.50061	0.869968	0.677361	-0.816898	0.593937	-1.26269	-0.712956	-0.88177	-0.199202	28		SIPA1L1..26037.	0.0303822	0.0498433	0.00196521	0.00290872	0.0113019	0.0212504	0.00241443	0.0121196	0.00645045	0.0334885	0.00909216	0.0124109	0.0142576
UID1643	SIPA1L1..26037./1065	1065	1065-KMPPPERAANIPRSISSDGRPLERRLSPGSD	26037	SIPA1L1	1.03285	0.0501758	0.635125	-0.0482046	-0.115387	0.13574	0.387312	0.0767155	0.631505	0.773327	0.362719	0.284411	0.308718	-0.0149911	0.689719	-0.348558	1.04852	-0.319654	-0.285163	0.657254	0.608601	1.24155	-0.212314	0.440538	-0.118795	-0.101046	0.084586	-0.127282	28		SIPA1L1..26037.	0.0303822	0.0498433	0.00196521	0.00290872	0.0113019	0.0212504	0.00241443	0.0121196	0.00645045	0.0334885	0.00909216	0.0124109	0.0142576
UID1645	SIPA1L1..26037./1067	1067	1067-NLRLFKEREKPLKRRSKSETGDSSIFRKLRN	26037	SIPA1L1	0.0622244	0.0328903	-0.959441	-0.282776	-0.0887728	0.343605	NA	-0.258687	-0.276105	0.094243	NA	NA	0.392168	-0.300575	NA	NA	NA	-0.175177	NA	NA	0.167941	0.806035	NA	0.131433	NA	NA	-0.65649	-0.198236	17		SIPA1L1..26037.	0.0303822	0.0498433	0.00196521	0.00290872	0.0113019	0.0212504	0.00241443	0.0121196	0.00645045	0.0334885	0.00909216	0.0124109	0.0142576
UID1648	SIPA1L1..26037./1070	1070	1070-KGEELGKSSDLEDNRSEDSVRPWTCPKCFAH	26037	SIPA1L1	-0.284888	-0.128422	NA	0.0981808	NA	-0.0270233	0.688584	-0.275439	0.196091	-0.462294	-0.053895	0.646907	0.220745	-0.00188637	0.00806046	0.0677567	-0.299242	-0.417181	-0.113691	0.509813	NA	NA	-0.643411	0.553423	-0.680924	0.020463	-0.303716	-0.0148335	24		SIPA1L1..26037.	0.0303822	0.0498433	0.00196521	0.00290872	0.0113019	0.0212504	0.00241443	0.0121196	0.00645045	0.0334885	0.00909216	0.0124109	0.0142576
UID1649	SIPA1L1..26037./1071	1071	1071-SSRHSASPVVFTSARSSPKEELHPAAPSQLA	26037	SIPA1L1	-0.0486976	0.703353	0.702655	0.058132	0.501567	-0.0768461	0.296152	-0.367336	-0.206746	-0.0338788	0.144513	0.00374381	0.0761187	0.076375	0.44374	-0.191796	0.665918	-0.282164	-0.371712	0.0589404	0.0266221	0.52005	0.271703	0.697165	-0.171298	-0.175604	-0.0254324	-0.236651	28		SIPA1L1..26037.	0.0303822	0.0498433	0.00196521	0.00290872	0.0113019	0.0212504	0.00241443	0.0121196	0.00645045	0.0334885	0.00909216	0.0124109	0.0142576
UID1650	SIPA1L1..26037./1072	1072	1072-SRHSASPVVFTSARSSPKEELHPAAPSQLAP	26037	SIPA1L1	-0.0424066	0.425459	0.227968	0.0266271	0.265476	-0.00493336	0.270414	-0.310724	-0.221817	0.0550001	-0.126873	-0.0127039	-0.0380056	0.116187	0.292047	-0.323676	0.735359	-0.445184	-0.477464	0.061268	0.0266221	0.52005	-0.0808575	0.664672	-0.161972	-0.194801	-0.0120549	-0.147748	28		SIPA1L1..26037.	0.0303822	0.0498433	0.00196521	0.00290872	0.0113019	0.0212504	0.00241443	0.0121196	0.00645045	0.0334885	0.00909216	0.0124109	0.0142576
UID1654	SIPA1L1..26037./1074	1074	1074-FPSTPTSRRALHRTLSDESIYNSQREHFFTS	26037	SIPA1L1	0.0544403	0.0320713	0.204288	0.154871	0.0918566	0.161296	0.680977	-0.199943	0.326835	-0.234996	0.0458891	0.517506	0.338164	0.0357367	0.264731	0.0599766	0.343618	-0.157072	-0.146313	0.6049	-0.147986	1.02074	0.0420836	0.908897	-0.335888	-0.015372	0.181148	-0.00839488	28		SIPA1L1..26037.	0.0303822	0.0498433	0.00196521	0.00290872	0.0113019	0.0212504	0.00241443	0.0121196	0.00645045	0.0334885	0.00909216	0.0124109	0.0142576
UID1655	SIPA1L1..26037./1075	1075	1075-RSGPGKEKVAPLWHSSSEVISMADRTLETES	26037	SIPA1L1	NA	-0.390892	-0.0210152	0.164407	-0.14933	-0.0378947	NA	0.457415	0.606785	-0.163604	-0.108456	-0.0632935	0.246969	0.0628366	0.0486608	-0.283117	-0.124179	-0.0597823	-0.487581	0.0812445	NA	0.653265	-0.339197	0.492203	-0.192808	-0.0402408	NA	0.00228151	24		SIPA1L1..26037.	0.0303822	0.0498433	0.00196521	0.00290872	0.0113019	0.0212504	0.00241443	0.0121196	0.00645045	0.0334885	0.00909216	0.0124109	0.0142576
UID1656	SIPA1L1..26037./1076	1076	1076-CHLPAVSKVLPAFRESPSGRLMRQDPVVHLS	26037	SIPA1L1	-0.725253	0.139333	-0.665509	-0.8139	NA	-0.453757	-1.24282	-0.895718	-0.97664	NA	-1.02488	-0.927676	0.140286	-1.041	-0.205918	-1.40833	-0.738033	-1.29182	-0.424309	-0.488806	-1.32686	NA	-0.822283	-0.426981	-1.08777	0.0568438	-1.30944	NA	24		SIPA1L1..26037.	0.0303822	0.0498433	0.00196521	0.00290872	0.0113019	0.0212504	0.00241443	0.0121196	0.00645045	0.0334885	0.00909216	0.0124109	0.0142576
UID1661	CYB5B..80777./1079	1079	1079-AEASGSDGKGQEVETSVTYYRLEEVAKRNSL	80777	CYB5B	0.540308	-0.503341	-0.461454	-0.478176	-0.00285387	-0.497181	-0.268695	-0.595639	0.116438	-0.347529	0.119646	0.219513	-0.316617	-0.463213	0.408265	-0.182051	-0.181089	0.0910312	1.14956	-0.705902	-0.20159	-0.46212	-0.346935	-0.584851	0.128774	1.21473	-0.734832	-0.179846	28		CYB5B..80777.	0.520782	0.0575324	0.025483	0.10542	0.25911	0.788821	0.121826	0.177793	0.170419	0.0472338	0.181358	0.363299	0.0831017
UID1663	PHGDH..26227./1080	1080	1080-VITQGTSLKNAGNCLSPAVIVGLLKEASKQA	26227	PHGDH	0.265958	-0.184762	0.23641	-0.761978	0.0405383	-0.0554826	-0.497484	-0.134345	-0.491715	1.3108	-0.15277	-0.00417805	0.601791	0.495402	-0.024303	0.149542	0.282773	-0.439843	0.0224737	0.516073	0.413015	-0.365085	0.0155431	0.184714	0.235906	-0.0372949	0.22349	-0.277498	28		PHGDH..26227.	0.136092	0.0313082	0.00520877	0.0332498	0.0458534	0.0115429	0.0556764	0.0907241	0.0788363	0.0155988	0.079089	0.0197599	0.0102561
UID1667	PHF1..5252./1082	1082	1082-RAHLQRALQASVSPPSPSPNQSYQGSSGYNF	5252	PHF1	NA	-0.841982	0.553094	-0.373314	0.1806	0.0637234	0.555016	0.161703	0.527388	0.5215	-0.0510304	0.330992	-0.0239198	0.188507	-0.424713	-0.262628	0.222136	0.27305	0.132708	0.275153	NA	0.310736	-0.387443	0.376147	-0.236153	0.0111213	NA	0.257689	25		PHF1..5252.	0.058054	0.0100332	0.0422101	0.0677322	0.0771737	0.137119	0.0381786	0.0280571	0.050995	0.0395	0.17788	0.0895689	0.0587942
UID1670	GPR39..2863./1085	1085	1085-EKIFLSTFQSEAEPQSKSQSLSLESLEPNSG	2863	GPR39	0.689178	-0.00650907	0.454304	1.08559	-0.23335	-0.281808	-0.17512	1.24194	0.374904	-0.0344112	0.608842	0.0496416	0.306425	-0.12496	0.2383	0.695693	-0.0185671	0.38325	0.0122676	-0.0211492	NA	NA	0.263091	0.238827	-0.309412	0.229349	0.435099	0.573193	26		GPR39..2863.	0.0333	0.189	0.00609	0.0214	0.0526	0.0487	0.0368	0.0323	0.123	0.0286	0.05	0.0338	0.0337
UID1673	GPR39..2863./1086	1086	1086-TFQSEAEPQSKSQSLSLESLEPNSGAKPANS	2863	GPR39	0.374356	-0.0588326	NA	NA	NA	NA	-0.270466	NA	NA	NA	0.630115	0.549525	NA	NA	0.558056	0.0393276	-0.609474	NA	-0.159975	-0.0483747	NA	NA	-0.0157003	NA	-0.10732	0.893661	0.0693769	NA	14		GPR39..2863.	0.0333	0.189	0.00609	0.0214	0.0526	0.0487	0.0368	0.0323	0.123	0.0286	0.05	0.0338	0.0337
UID1675	DYNC1LI2..1783./1087	1087	1087-SLLAKQPATPTRASESPARGPSGSPRTQGRG	1783	DYNC1LI2	-0.182013	2.08064	2.32311	NA	2.98218	NA	-0.324713	NA	NA	-0.167525	1.25085	-1.02246	NA	1.1313	0.501229	-0.9869	0.460262	NA	-0.730113	0.820136	0.801918	0.995548	1.84893	NA	0.559441	-0.0554762	2.20475	NA	20		DYNC1LI2..1783.	0.138368	0.0274591	0.12745	0.0294339	0.095834	0.060506	0.0150853	0.0710157	0.0283388	0.131943	0.145588	0.0314099	0.0402523
UID1677	DYNC1LI2..1783./1088	1088	1088-KDFQDYMEPEEGCQGSPQRRGPLTSGSDEEN	1783	DYNC1LI2	-0.171244	0.457048	0.00741768	0.0652045	-0.0188014	0.457912	-0.260374	-0.133709	-0.40761	-0.438078	0.258092	-0.39479	-0.219449	-0.0395285	0.0698277	0.256234	0.555275	0.315037	0.141731	-0.0761406	-0.437375	-0.184092	-0.146832	-0.0363051	0.321258	0.600782	-0.41305	-0.114135	28		DYNC1LI2..1783.	0.138368	0.0274591	0.12745	0.0294339	0.095834	0.060506	0.0150853	0.0710157	0.0283388	0.131943	0.145588	0.0314099	0.0402523
UID1679	DYNC1LI2..1783./1089	1089	1089-SPRTQGRGGPASVPSSSPGTSVKKPDPNIKN	1783	DYNC1LI2	0.105775	-0.358733	-0.711369	-0.248547	-0.187301	-0.288224	-0.693625	-0.0719309	-0.0439544	NA	-0.186585	0.385035	-0.712129	NA	-0.15962	1.25641	-0.305979	0.0116901	-0.0897393	-0.243133	NA	0.153833	-0.0938573	-0.983332	-0.164962	-0.374888	-0.07759	0.00130463	25		DYNC1LI2..1783.	0.138368	0.0274591	0.12745	0.0294339	0.095834	0.060506	0.0150853	0.0710157	0.0283388	0.131943	0.145588	0.0314099	0.0402523
UID1680	DYNC1LI2..1783./1090	1090	1090-PRTQGRGGPASVPSSSPGTSVKKPDPNIKNN	1783	DYNC1LI2	0.355709	-0.182641	NA	-0.554126	-0.594619	-0.174445	-0.999882	-0.258449	-0.492178	-1.73241	-0.558491	-0.437188	-0.773071	-0.312147	-0.929491	-0.405334	-0.501911	-0.4128	-0.165431	-0.526814	NA	-1.28616	0.0204601	-0.905323	-0.0381179	-0.0543065	-1.22537	-0.396565	26		DYNC1LI2..1783.	0.138368	0.0274591	0.12745	0.0294339	0.095834	0.060506	0.0150853	0.0710157	0.0283388	0.131943	0.145588	0.0314099	0.0402523
UID1684	DYNC1LI2..1783./1093	1093	1093-LDRMTRKPDSMVTNSSTENEA__________	1783	DYNC1LI2	1.1492	-0.238864	-0.20515	-0.163155	0.346102	-0.12987	-0.242252	0.0748549	-0.231054	NA	0.458676	0.0960503	0.265578	NA	0.569042	0.429518	0.445626	-0.287814	-0.223666	-0.0496633	NA	0.475163	0.0187669	-0.136644	0.549119	0.127001	0.310502	-0.0114007	25		DYNC1LI2..1783.	0.138368	0.0274591	0.12745	0.0294339	0.095834	0.060506	0.0150853	0.0710157	0.0283388	0.131943	0.145588	0.0314099	0.0402523
UID1685	DYNC1LI2..1783./1094	1094	1094-VLASFFNSLLSKKTGSPGSPGAGGVQSTAKK	1783	DYNC1LI2	NA	NA	NA	-0.22066	-0.272052	0.0184526	NA	-0.362706	-0.356293	-0.950715	NA	-0.113565	-0.268837	-0.0824928	-0.447765	0.0180149	NA	-0.369687	NA	-0.510104	NA	-0.286648	NA	-0.365252	-0.176235	-0.164334	NA	-0.286189	18		DYNC1LI2..1783.	0.138368	0.0274591	0.12745	0.0294339	0.095834	0.060506	0.0150853	0.0710157	0.0283388	0.131943	0.145588	0.0314099	0.0402523
UID1686	DYNC1LI2..1783./1095	1095	1095-SFFNSLLSKKTGSPGSPGAGGVQSTAKKSGQ	1783	DYNC1LI2	0.0182524	-0.170989	-0.171395	-0.365959	0.608079	-0.130157	-0.549615	-0.544938	-0.506666	-1.37309	-0.277495	-0.519351	-0.235447	-0.308497	-0.395706	0.152058	-0.0139885	-0.296282	-0.0601082	-0.661579	-0.26755	-0.286377	1.65284	-0.0203266	-0.119494	0.176661	-0.611912	-1.1251	28		DYNC1LI2..1783.	0.138368	0.0274591	0.12745	0.0294339	0.095834	0.060506	0.0150853	0.0710157	0.0283388	0.131943	0.145588	0.0314099	0.0402523
UID1687	PSMD3..5709./1096	1096	1096-PQDVEMKEEAATGGGSTGEADGKTAAAAAEH	5709	PSMD3	-0.0759247	0.259281	-0.361383	0.317316	0.210997	0.0617166	0.0972509	0.067989	0.277741	0.487897	0.383286	-0.0776173	0.248455	-0.0424814	0.241308	0.0429853	0.210021	0.299197	0.0537771	-0.0983539	0.084184	0.067407	0.481972	0.268384	0.013389	-0.0928609	0.159715	0.133096	28		PSMD3..5709.	0.999871	0.999991	0.949256	0.98033	0.968137	0.998612	0.963763	1	0.976332	0.976552	0.995302	1	0.976906
UID1688	PSMD3..5709./1097	1097	1097-SRISLADIAQKLQLDSPEDAEFIVAKAIRDG	5709	PSMD3	0.610994	-0.391919	0.160233	NA	-0.129665	-0.0857863	0.323761	-0.00545788	-0.174657	-0.191262	0.0388639	NA	-0.126533	-0.484024	0.497993	0.0801535	-0.0374467	0.460826	-0.126893	NA	-0.284096	1.44321	0.148064	NA	NA	0.213298	0.317461	NA	22		PSMD3..5709.	0.999871	0.999991	0.949256	0.98033	0.968137	0.998612	0.963763	1	0.976332	0.976552	0.995302	1	0.976906
UID1691	SIAH2..6478./1098	1098	1098-__________MSRPSSTGPSANKPCSKQPPP	6478	SIAH2	-0.538985	-0.0266366	0.010375	0.0983725	NA	-0.133966	-0.41095	0.0753279	-0.0921156	-0.426831	-0.586031	-0.331154	-0.269232	-0.283155	-0.466709	-0.172659	-0.129279	-0.0451925	-0.035902	0.0523276	NA	NA	0.350013	0.0558577	-0.0967932	-0.620896	0.18447	0.0196199	25		SIAH2..6478.	0.00986	0.304	0.0105	0.0205	0.0156	0.0186	0.00723	0.0226	0.0485	0.0804	0.0163	0.0369	0.0129
UID1695	SART1..9092./1099	1099	1099-GAEAEARSSTHGRERSQAEPSERRVKREKRD	9092	SART1	-0.0178032	0.966085	0.762625	0.685493	0.867449	0.428688	NA	0.517809	0.367029	2.11457	NA	NA	0.749041	0.352827	NA	NA	NA	0.81003	NA	NA	0.775062	0.309045	NA	0.268269	NA	NA	0.670866	0.666694	17		SART1..9092.	0.957007	1	0.879136	0.968576	0.941856	0.964638	0.963091	0.937492	0.888704	0.985519	0.999694	0.872645	0.926626
UID1696	SART1..9092./1100	1100	1100-GDFGSRLRGRGRRRVSEVEEEKEPVPQPLPS	9092	SART1	0.357402	-0.0381268	0.113626	-0.448619	0.329841	-0.19856	0.458362	0.312532	0.416898	0.790656	0.259665	0.29888	-0.0089337	-0.0528259	0.311179	0.426497	0.177794	0.517131	-0.0794853	0.628207	0.383808	0.121364	-0.112378	0.110062	-0.0727164	-0.132228	0.422645	0.172559	28		SART1..9092.	0.957007	1	0.879136	0.968576	0.941856	0.964638	0.963091	0.937492	0.888704	0.985519	0.999694	0.872645	0.926626
UID1698	SART1..9092./1101	1101	1101-DFERDEERSANGGSESDGEENIGWSTVNLDE	9092	SART1	-0.372359	-0.23987	-0.505889	0.130344	-0.114068	-0.065853	0.154963	0.118576	0.0343973	-0.856238	-0.429214	-0.0453157	0.0814946	0.307832	0.0926002	0.0259539	-0.237374	-0.35022	-0.0550273	0.105964	-0.0250944	0.0957966	-0.0280992	0.235666	0.0458721	-0.0297133	0.541618	-0.01244	28		SART1..9092.	0.957007	1	0.879136	0.968576	0.941856	0.964638	0.963091	0.937492	0.888704	0.985519	0.999694	0.872645	0.926626
UID1704	SPINT2..10653./1103	1103	1103-RVARRNQERALRTVWSSGDDKEQLVKNTYVL	10653	SPINT2	0.428895	-1.1344	1.0304	-0.568597	-0.327569	NA	0.0631027	0.455245	NA	2.79776	NA	0.479902	-0.250423	-0.463991	NA	NA	NA	NA	NA	-0.852081	1.11439	-0.368353	NA	-0.497692	0.262855	NA	-0.190039	NA	17		SPINT2..10653.	0.560439	0.0461798	0.0964755	0.124211	0.243768	0.190268	0.119242	0.0826174	0.0950448	0.0608052	0.0870333	0.47922	0.0734395
UID1707	TGFB1I1..7041./1105	1105	1105-SGEQKEDQSEDKKRPSLPSSPSPGLPKASAT	7041	TGFB1I1	-0.45438	-0.894183	-0.864243	-0.87399	-0.0971378	-0.473766	-1.44655	-1.98026	-0.558852	-0.0260365	-0.773989	2.22573	-1.25105	-0.245081	-0.35465	2.05685	0.835497	0.176884	-0.604877	1.19026	-1.43624	-0.217038	-0.58061	1.01031	-0.392875	0.786516	-1.44993	-0.22842	28		TGFB1I1..7041.	0.0024767	0.142865	0.00183471	0.0514052	0.026724	0.0684349	0.00876752	0.0194412	0.0750453	0.0978914	0.0186715	0.204773	0.0509379
UID1710	TGFB1I1..7041./1106	1106	1106-DQSEDKKRPSLPSSPSPGLPKASATSATLEL	7041	TGFB1I1	-0.204935	NA	NA	-0.0225947	-0.0341997	0.0521297	-0.142239	-0.187617	-0.385468	NA	NA	1.05492	0.137309	0.0455418	-0.124004	1.52843	NA	NA	NA	0.52281	-0.2575	0.0918064	NA	0.641979	-0.0363803	0.372075	0.121663	-0.232305	20		TGFB1I1..7041.	0.0024767	0.142865	0.00183471	0.0514052	0.026724	0.0684349	0.00876752	0.0194412	0.0750453	0.0978914	0.0186715	0.204773	0.0509379
UID1711	TGFB1I1..7041./1107	1107	1107-SGDKDHLYSTVCKPRSPKPAAPAAPPFSSSS	7041	TGFB1I1	-0.330647	-1.2706	-2.05022	-0.497848	-0.573646	-0.556302	-0.681974	-1.45244	-1.346	-0.824367	-0.893242	1.25981	-0.863416	-0.202227	-0.146362	1.96951	0.70801	-0.425483	-0.869385	0.978224	-1.70095	-0.523696	-1.05118	0.470615	-0.0444934	0.70627	-0.976894	-0.790266	28		TGFB1I1..7041.	0.0024767	0.142865	0.00183471	0.0514052	0.026724	0.0684349	0.00876752	0.0194412	0.0750453	0.0978914	0.0186715	0.204773	0.0509379
UID1712	TGFB1I1..7041./1108	1108	1108-EGRPLCENHFHARRGSLCATCGLPVTGRCVS	7041	TGFB1I1	-0.233309	-0.469395	-0.320702	-0.278276	-0.102738	-0.0984135	-0.438334	-0.774699	-0.185327	0.391787	-0.528369	1.88277	-0.425965	-0.396221	-0.471029	2.74331	0.764046	-0.0188904	-0.34152	0.967002	-0.580215	0.0741558	-0.195739	0.418194	-0.0418104	0.194161	-0.355523	-0.125269	28		TGFB1I1..7041.	0.0024767	0.142865	0.00183471	0.0514052	0.026724	0.0684349	0.00876752	0.0194412	0.0750453	0.0978914	0.0186715	0.204773	0.0509379
UID1713	TGFB1I1..7041./1109	1109	1109-QNHLPASGPTQPPVVSSTNEGSPSPPEPTGK	7041	TGFB1I1	-0.449984	-0.306776	NA	NA	NA	NA	-0.799498	NA	NA	NA	-0.557539	1.18417	NA	NA	-0.563854	1.60965	0.353387	NA	-0.559339	0.723568	NA	NA	-0.291085	NA	-0.0281487	0.377243	-0.607005	NA	14		TGFB1I1..7041.	0.0024767	0.142865	0.00183471	0.0514052	0.026724	0.0684349	0.00876752	0.0194412	0.0750453	0.0978914	0.0186715	0.204773	0.0509379
UID1719	SRGAP3..9901./1111	1111	1111-SDYGFGGVMGRVRLRSDGAAIPRRRSGGDTH	9901	SRGAP3	-0.114758	-0.22504	-0.0311818	NA	-0.0459065	NA	0.0308619	NA	NA	-0.369743	-0.153509	-0.363034	NA	0.234369	-0.0849919	-1.14107	-0.317271	-0.864895	-0.501538	-0.0318036	-0.136433	-0.160889	0.156682	NA	-0.261041	-0.05409	0.868451	NA	21		SRGAP3..9901.	0.0154947	0.0178566	0.00409306	0.0117799	0.0258129	0.004672	0.00701347	0.0204689	0.0139554	0.0141208	0.0083493	0.150622	0.0235338
UID1722	SRGAP3..9901./1112	1112	1112-DGAAIPRRRSGGDTHSPPRGLGPSIDTPPRA	9901	SRGAP3	-1.1292	1.03045	-0.594956	-0.760285	-0.931558	NA	-1.88958	-1.13736	NA	-0.343334	NA	0.133666	0.393912	-0.371625	NA	NA	NA	NA	NA	-1.14054	-0.894798	-0.195362	NA	0.604795	-0.129691	NA	0.113811	NA	17		SRGAP3..9901.	0.0154947	0.0178566	0.00409306	0.0117799	0.0258129	0.004672	0.00701347	0.0204689	0.0139554	0.0141208	0.0083493	0.150622	0.0235338
UID1726	HSPA12A..259217./1114	1114	1114-GGSDGPRETAPTSAYSSPARSLGDTGITPLS	259217	HSPA12A	0.447331	0.904432	NA	-0.191769	NA	NA	-0.765393	-0.107538	NA	NA	1.46612	-1.37678	0.716624	1.47414	2.36267	-0.193789	-0.539927	NA	1.72759	-0.825705	-2.26313	NA	-0.751097	-0.520295	2.7558	0.580554	-1.04899	NA	20		HSPA12A..259217.	0.0240456	0.048991	0.0122363	0.0194253	0.0563003	0.0285047	0.00806216	0.0321654	0.0460464	0.0246268	0.031635	0.0433382	0.0482557
UID1727	HSPA12A..259217./1115	1115	1115-GSDGPRETAPTSAYSSPARSLGDTGITPLSP	259217	HSPA12A	-0.210042	-0.513617	1.79777	0.243353	-0.0656366	-0.738929	-1.50461	-1.35598	0.878565	-1.15697	0.194953	-1.60226	-0.397166	-1.12049	-0.329192	0.305147	0.503122	-1.50539	0.171344	-0.712872	-1.2704	-0.459073	-0.819227	0.0636504	1.81067	-0.220889	-1.05047	-1.10199	28		HSPA12A..259217.	0.0240456	0.048991	0.0122363	0.0194253	0.0563003	0.0285047	0.00806216	0.0321654	0.0460464	0.0246268	0.031635	0.0433382	0.0482557
UID1729	CCP110..9738./1117	1117	1117-GFVNKNKMLGTSSKESEELLKSKMLAFEEMR	9738	CCP110	1.86657	-0.376358	0.22504	0.17349	0.0211906	-0.516237	-0.595661	0.831252	0.437985	-0.718707	0.595649	1.9675	0.204315	-0.24424	1.1718	1.27317	-0.581105	1.39846	0.39291	1.29466	0.78318	1.02411	0.525383	-0.327535	0.286302	0.514688	1.66494	0.146099	28		CCP110..9738.	0.0279188	0.30709	0.0667054	0.154263	0.542885	0.490301	0.520709	0.29073	0.107256	0.148173	0.0977094	0.0433387	0.115912
UID1732	CCP110..9738./1119	1119	1119-LTGSYAKLPSPEPSMSPKMHRRRSRTSSACH	9738	CCP110	-1.06912	0.179598	0.258221	0.105912	0.140153	0.0919105	-0.598303	-0.0252015	0.0280541	-0.69065	0.285291	-0.0741657	-0.297416	-0.317642	-0.450197	0.044356	0.801023	0.0942197	-0.334245	0.53612	-0.601496	0.022116	-0.0877929	0.625654	-0.0552731	0.153972	-0.224773	-0.0559832	28		CCP110..9738.	0.0279188	0.30709	0.0667054	0.154263	0.542885	0.490301	0.520709	0.29073	0.107256	0.148173	0.0977094	0.0433387	0.115912
UID1733	ADCY6..112./1120	1120	1120-EEKAMLAKLQRTRANSMEGLMPRWVPDRAFS	112	ADCY6	1.33163	0.170878	0.39618	0.375581	-0.461133	-0.0712285	0.556185	0.326307	0.566713	0.843061	0.739645	-0.576375	0.544827	0.188681	0.68001	-0.249501	0.797389	0.140105	-0.259151	0.131419	0.797419	0.926592	0.627704	0.377313	0.376946	0.503412	0.354422	0.188603	28		ADCY6..112.	0.0227157	0.0415258	0.0113123	0.0314706	0.0631158	0.05868	0.00201627	0.0156466	0.0904497	0.0470767	0.03397	0.149676	0.0844641
UID1734	ADCY6..112./1121	1121	1121-CTPRYMSCLRDAEPPSPTPAGPPRCPWQDDA	112	ADCY6	0.707313	0.0781353	0.114069	0.11126	-0.1949	-0.0181174	0.248254	-0.0479244	0.472738	0.616392	0.259236	-0.279464	0.32749	0.0906493	0.638775	-0.0559409	0.34483	-0.121632	-0.125458	0.0161996	0.202644	0.436512	0.800427	-0.129043	0.2648	0.402747	-0.00570854	0.226142	28		ADCY6..112.	0.0227157	0.0415258	0.0113123	0.0314706	0.0631158	0.05868	0.00201627	0.0156466	0.0904497	0.0470767	0.03397	0.149676	0.0844641
UID1736	CTIF..9811./1123	1123	1123-DTAGDTGHSSLEAPRSPDTLAPVASERLPPQ	9811	CTIF	0.217731	-0.112862	0.146072	-0.173973	1.05816	-0.109675	-0.0489178	-0.376718	-0.210225	0.643646	-0.00266314	0.859204	-0.100799	-0.141887	0.229118	1.73311	0.22835	0.115757	0.22449	1.0024	NA	NA	0.114665	-0.277993	-0.674954	0.105202	-0.242183	-0.317461	26		CTIF..9811.	0.0467966	0.0174962	0.025034	0.0214784	0.0451577	0.0329772	0.0159837	0.0202022	0.0120696	0.0502792	0.0146627	0.0819676	0.0629733
UID1737	CTIF..9811./1124	1124	1124-NSSAASASSEAGSSRSQEIEELERFIDSYVL	9811	CTIF	-0.367921	0.0358062	NA	NA	NA	NA	-0.197044	NA	NA	NA	0.072814	0.828339	NA	NA	0.223574	0.721755	-0.385325	NA	0.274434	0.0147853	NA	NA	0.00796032	NA	-0.311959	0.0929155	-0.355933	NA	14		CTIF..9811.	0.0467966	0.0174962	0.025034	0.0214784	0.0451577	0.0329772	0.0159837	0.0202022	0.0120696	0.0502792	0.0146627	0.0819676	0.0629733
UID1739	MTSS1..9788./1126	1126	1126-TVSPGQIPESDPADLSPRDTPQGEDMLNAIR	9788	MTSS1	0.253983	0.0294459	0.177917	NA	0.0372534	0.126825	0.244442	-0.233624	0.164424	0.420498	0.233119	-0.100568	0.39119	NA	0.115758	0.170874	2.69514	0.0704246	0.152725	0.3504	NA	NA	0.235727	NA	0.524625	0.132837	0.242656	NA	22		MTSS1..9788.	0.0401803	0.0873505	0.294348	0.0984878	0.0511338	0.15738	0.0297139	0.171057	0.183317	0.0723084	0.0315331	0.291778	0.170287
UID1741	MTSS1..9788./1128	1128	1128-LKGSDYSWSYQTPPSSPSTTMSRKSSVCSSL	9788	MTSS1	-0.00633717	0.0812955	NA	NA	NA	NA	0.177515	NA	NA	NA	0.241236	0.558779	NA	NA	0.416036	-0.1652	2.41922	NA	0.39614	-0.0462184	NA	NA	0.110525	NA	0.195353	0.288992	0.0694723	NA	14		MTSS1..9788.	0.0401803	0.0873505	0.294348	0.0984878	0.0511338	0.15738	0.0297139	0.171057	0.183317	0.0723084	0.0315331	0.291778	0.170287
UID1743	MTSS1..9788./1130	1130	1130-QTPPSSPSTTMSRKSSVCSSLNSVNSSDSRS	9788	MTSS1	0.4465	-0.956024	-0.0939031	NA	-0.0662022	0.0147319	0.102151	0.00280285	0.212077	0.288367	-0.174297	-0.696431	-0.0118537	NA	0.308138	-0.291405	5.3798	0.119718	0.181443	-0.734436	NA	NA	-0.100902	NA	-0.0949411	0.856156	-0.494754	NA	22		MTSS1..9788.	0.0401803	0.0873505	0.294348	0.0984878	0.0511338	0.15738	0.0297139	0.171057	0.183317	0.0723084	0.0315331	0.291778	0.170287
UID1748	MTSS1..9788./1133	1133	1133-ISQSYRRMFQAKRPASTAGLPTTLGPAMVTP	9788	MTSS1	-0.192687	-0.261511	-0.251803	NA	0.0451288	0.179433	0.0594201	0.148171	-0.102469	0.198695	0.0350064	0.641273	-0.518827	NA	-0.0513644	0.00263023	3.31176	-0.0859647	0.0853796	-0.142125	NA	NA	-0.0567177	NA	-0.294463	0.145667	0.109265	NA	22		MTSS1..9788.	0.0401803	0.0873505	0.294348	0.0984878	0.0511338	0.15738	0.0297139	0.171057	0.183317	0.0723084	0.0315331	0.291778	0.170287
UID1749	MTSS1..9788./1134	1134	1134-PAMVTPGVATIRRTPSTKPSVRRGTIGAGPI	9788	MTSS1	NA	0.276617	0.204146	NA	0.0891066	-0.144043	-0.243022	-0.351085	-0.10338	-0.0844064	0.149542	NA	0.0444446	NA	0.588859	0.0609646	4.95995	-0.066751	0.525234	NA	NA	NA	-0.0571816	NA	NA	0.173922	NA	NA	17		MTSS1..9788.	0.0401803	0.0873505	0.294348	0.0984878	0.0511338	0.15738	0.0297139	0.171057	0.183317	0.0723084	0.0315331	0.291778	0.170287
UID1752	PPIP5K2..23262./1136	1136	1136-GCIDDATRGSAVKRFSISFARHPTNGFELYS	23262	PPIP5K2	0.756524	-0.524823	-0.0586278	-0.217995	-0.376669	-0.313376	-0.555208	0.572248	0.343506	0.599289	-0.555999	0.734545	-0.781397	-0.341993	-0.112429	1.91608	2.07902	0.0696839	0.624963	1.02572	-0.210284	-0.417048	-0.60483	0.0247733	0.0131429	0.255203	-0.116026	-0.429267	28		PPIP5K2..23262.	0.0440247	0.120286	0.250612	0.019633	0.350178	0.159459	0.0624593	0.116083	0.101204	0.101401	0.00803223	0.293214	0.0367054
UID1753	PPIP5K2..23262./1137	1137	1137-LHYTSGVGTGRRRRRSGEQITSSPVSPKSLA	23262	PPIP5K2	0.969353	-0.19883	0.149278	-0.177613	0.157959	0.0156746	-0.332882	-0.0672827	-0.0748894	0.00554101	-0.0500674	0.251549	-0.407934	-0.262688	-0.284568	0.212355	0.176616	1.34862	-0.0504751	-0.342546	-0.0846039	0.417991	-0.300507	-0.000331243	0.197832	0.143582	0.257937	0.0458832	28		PPIP5K2..23262.	0.0440247	0.120286	0.250612	0.019633	0.350178	0.159459	0.0624593	0.116083	0.101204	0.101401	0.00803223	0.293214	0.0367054
UID1759	MAP3K7..6885./1141	1141	1141-QSESGRLSLGASRGSSVESLPPTSEGKRMSA	6885	MAP3K7	0.466914	0.270498	NA	0.354424	NA	0.181414	-0.309152	0.50747	0.403538	0.0656815	0.134303	-0.231786	0.188368	0.138521	-0.0262909	-0.521398	-0.139339	0.25118	-0.290928	-0.138026	NA	NA	0.538695	0.359123	0.12079	-0.424657	0.356742	0.239365	24		MAP3K7..6885.	0.00620701	0.0619403	0.0219704	0.0616219	0.0361081	0.120565	0.052253	0.046124	0.043294	0.0852762	0.845285	0.020706	0.206801
UID1761	MAP3K7..6885./1142	1142	1142-TTAYSKPKRGHRKTASFGNILDVPEIVISGN	6885	MAP3K7	-0.206609	-0.0411337	-0.40466	-0.625118	-0.0262454	-0.201824	0.470575	0.280558	0.276304	-0.357065	-0.0389587	-0.133338	0.0548299	-0.452388	0.160284	-1.31486	-0.257617	-0.363465	0.145722	-0.646535	0.443784	-0.113798	0.265318	0.224607	0.0391197	-0.32776	0.278723	0.0433108	28		MAP3K7..6885.	0.00620701	0.0619403	0.0219704	0.0616219	0.0361081	0.120565	0.052253	0.046124	0.043294	0.0852762	0.845285	0.020706	0.206801
UID1762	MAP3K7..6885./1143	1143	1143-SSVESLPPTSEGKRMSADMSEIEARIAATTA	6885	MAP3K7	0.40737	-0.0216784	-0.581873	-0.402306	0.00769043	-0.28461	0.0729062	0.268631	-0.310226	0.123216	-0.277075	0.356573	-0.34188	-0.471106	-0.185831	0.933254	-0.146787	0.966432	-0.124633	0.394397	0.204536	0.572382	-0.338905	-0.156368	-0.337258	-0.250135	-0.173405	0.236257	28		MAP3K7..6885.	0.00620701	0.0619403	0.0219704	0.0616219	0.0361081	0.120565	0.052253	0.046124	0.043294	0.0852762	0.845285	0.020706	0.206801
UID1763	MAP3K7..6885./1144	1144	1144-VPEIVISGNGQPRRRSIQDLTVTGTEPGQVS	6885	MAP3K7	0.124739	-0.118469	-0.671782	-0.22445	-0.0222912	-0.114334	0.236707	-0.0289462	0.146477	0.0873663	0.0900238	0.241323	-0.00625706	-0.271055	-0.15279	-0.0149314	0.200442	0.25408	0.0902084	0.0871781	0.336407	-0.0246445	0.0982703	-0.0686302	-0.225836	-0.043293	0.131088	0.0611928	28		MAP3K7..6885.	0.00620701	0.0619403	0.0219704	0.0616219	0.0361081	0.120565	0.052253	0.046124	0.043294	0.0852762	0.845285	0.020706	0.206801
UID1764	MAP3K7..6885./1145	1145	1145-SIQDLTVTGTEPGQVSSRSSSPSVRMITTSG	6885	MAP3K7	0.0663994	0.00948922	0.460475	-0.27144	0.45461	-0.00495052	-0.55692	-0.187589	-0.379858	-0.15611	-0.281025	-0.202668	-0.276384	-0.207281	-0.452248	0.00539112	0.18657	-0.20284	-0.426752	-0.318317	0.0547311	0.58325	-0.110764	-0.131886	0.0133009	0.049171	0.0127664	-0.279276	28		MAP3K7..6885.	0.00620701	0.0619403	0.0219704	0.0616219	0.0361081	0.120565	0.052253	0.046124	0.043294	0.0852762	0.845285	0.020706	0.206801
UID1768	MSI1..4440./1146	1146	1146-NKMVECKKAQPKEVMSPTGSARGRSRVMPYG	4440	MSI1	-0.740852	-2.72229	-2.7114	-0.0228763	-0.68148	0.454113	-2.69474	-2.37799	-1.85651	-1.15928	-2.3312	-0.969757	-2.08563	-2.5576	-2.59588	-2.64601	-2.17176	-2.23225	-2.41999	1.59043	-2.6162	-1.94385	-0.693169	-2.36123	-2.43921	-2.49825	-2.28335	-2.03272	28		MSI1..4440.	0.088553	0.0431461	0.27121	0.142098	0.0443707	0.19382	0.100978	0.0838005	0.0814013	0.0198269	0.0705007	0.0917143	0.00489314
UID1770	RIPK2..8767./1148	1148	1148-SSQLHENSGSPETSRSLPAPQDNDFLSRKAQ	8767	RIPK2	-0.255909	-0.189839	0.0193787	-0.276655	-0.361047	-0.44091	-0.234914	-0.311625	-0.487505	-0.568877	-0.641668	-0.0777795	-0.177972	-0.170328	-0.592546	0.277379	-0.520433	-0.16008	-0.158647	0.954136	-0.0529372	0.0807734	-0.303077	-0.395345	-0.320637	-0.605842	-0.286566	-0.263738	28		RIPK2..8767.	0.00457881	0.107044	0.0122653	0.0756375	0.0315384	0.036729	0.00305662	0.0164386	0.043276	0.0600289	0.0363844	0.0144163	0.0417883
UID1771	RIPK2..8767./1149	1149	1149-QMGLQPYPEILVVSRSPSLNLLQNKSM____	8767	RIPK2	-0.736637	NA	NA	-0.439356	NA	-1.08053	-0.819956	-0.725178	-0.908958	0.277319	NA	-0.305044	-0.854606	-0.926991	NA	NA	NA	0.468354	NA	1.00103	-0.948494	NA	NA	-0.775933	-0.445075	NA	-0.869903	-0.501011	17		RIPK2..8767.	0.00457881	0.107044	0.0122653	0.0756375	0.0315384	0.036729	0.00305662	0.0164386	0.043276	0.0600289	0.0363844	0.0144163	0.0417883
UID1772	RIPK2..8767./1150	1150	1150-GLQPYPEILVVSRSPSLNLLQNKSM______	8767	RIPK2	-0.330737	-0.727559	0.69511	-0.41278	-0.841309	-0.771793	-0.268926	-0.449662	-0.654003	-0.359716	-0.540377	-0.155005	-0.721073	-0.960153	-0.89106	0.478535	-0.336509	0.165965	-0.066926	1.11874	0.382229	-0.168009	-0.369701	-0.706507	-0.373271	-0.710162	-0.718887	-0.272342	28		RIPK2..8767.	0.00457881	0.107044	0.0122653	0.0756375	0.0315384	0.036729	0.00305662	0.0164386	0.043276	0.0600289	0.0363844	0.0144163	0.0417883
UID1773	HOXA3..3200./1151	1151	1151-KDQKGKGMLTSSGGQSPSRSPVPPGAGGYLN	3200	HOXA3	0.961205	-1.21206	0.646297	-0.909418	-0.494008	-1.26313	0.272062	0.677984	0.315411	-0.54418	0.361692	-0.263387	-0.829895	0.804032	-0.30511	-0.759385	1.6283	1.90403	-0.00907834	-1.3622	0.41398	-0.185018	-0.121983	1.52953	1.39515	0.901093	0.541163	0.236194	28		HOXA3..3200.	0.0223422	0.0151474	0.0367905	0.0262477	0.0706806	0.0305945	0.0603387	0.0591673	0.0270845	0.0933967	0.00789783	0.0422263	0.0764909
UID1774	HOXA3..3200./1152	1152	1152-PQNASNNPTPANAAKSPLLNSPTVAKQIFPW	3200	HOXA3	0.258995	-0.221619	NA	-0.390601	-0.30854	-0.426756	0.440387	0.396537	0.210618	-0.129208	0.0577965	0.108761	-0.481531	0.5585	0.447979	-0.0586505	0.845221	0.948392	0.0811853	-0.497663	0.00423908	1.10332	0.111456	0.39132	0.438697	0.163437	0.478302	0.557876	27		HOXA3..3200.	0.0223422	0.0151474	0.0367905	0.0262477	0.0706806	0.0305945	0.0603387	0.0591673	0.0270845	0.0933967	0.00789783	0.0422263	0.0764909
UID1775	HOXA3..3200./1153	1153	1153-NNPTPANAAKSPLLNSPTVAKQIFPWMKESR	3200	HOXA3	1.21778	-0.402109	0.623365	-0.734849	-0.155507	-0.280789	0.091815	0.0543742	0.121088	-0.084671	0.0752292	-0.0202246	-0.404438	0.490641	NA	NA	0.3135	0.573944	0.0948534	-0.66806	0.52772	0.149914	-0.0164595	0.278401	0.479425	NA	0.0931656	NA	24		HOXA3..3200.	0.0223422	0.0151474	0.0367905	0.0262477	0.0706806	0.0305945	0.0603387	0.0591673	0.0270845	0.0933967	0.00789783	0.0422263	0.0764909
UID1776	HOXA3..3200./1154	1154	1154-KTSSSSSGESCAGDKSPPGQASSKRARTAYT	3200	HOXA3	1.20686	-0.640489	0.592733	-0.83425	-0.421312	-0.706265	0.265939	0.444456	0.0612416	-0.0377171	0.0165951	-0.479903	-0.755546	1.10979	-0.29406	-0.68751	1.01012	1.18407	-0.00526571	-1.00522	0.60963	0.124068	0.132389	1.31301	1.19013	0.600324	0.948553	0.41649	28		HOXA3..3200.	0.0223422	0.0151474	0.0367905	0.0262477	0.0706806	0.0305945	0.0603387	0.0591673	0.0270845	0.0933967	0.00789783	0.0422263	0.0764909
UID1777	WDR62..284403./1155	1155	1155-MDRGGSQPRAGTGYASPDRTHVLAAGKAEET	284403	WDR62	0.0252357	-0.389293	-0.987291	0.06649	-0.875225	-0.0917978	-0.0568461	0.169207	-0.366463	-0.993196	-0.198545	0.6405	-0.532437	-0.973301	-1.28701	0.96387	0.142755	-0.440673	-1.0962	-0.0854675	-1.32843	-0.661939	-1.36329	-0.283538	-0.66024	0.164181	-0.439445	-0.247922	28		WDR62..284403.	0.337891	0.0215545	0.151609	0.0792021	0.142395	0.191921	0.0819444	0.191982	0.0189431	0.152621	0.0313838	0.086636	0.0393072
UID1784	WDR62..284403./1159	1159	1159-LPSVMAGVPARRGQSSPPPAPPICLRRRTRL	284403	WDR62	0.438653	-0.013192	0.00360489	0.181993	-0.209688	0.0400065	0.0595765	0.101791	0.183069	0.011778	0.0621346	0.535807	-0.0631158	-0.228613	-0.0948572	0.52637	0.403194	-0.286744	-0.101263	0.17864	-0.102141	-0.218721	0.0946488	-0.0583076	0.0685706	0.300758	0.257693	0.159992	28		WDR62..284403.	0.337891	0.0215545	0.151609	0.0792021	0.142395	0.191921	0.0819444	0.191982	0.0189431	0.152621	0.0313838	0.086636	0.0393072
UID1785	WDR62..284403./1160	1160	1160-VEASEAEDHFFNPRLSISTQFLSSLQKASRF	284403	WDR62	0.064332	-0.0448453	-0.422113	NA	-0.561085	NA	-0.155388	NA	NA	0.0423889	-0.0834684	0.440741	NA	-0.603702	-0.260616	0.660857	1.83524	NA	-0.198186	-0.161133	0.510406	-0.26021	-0.245723	NA	-0.0749531	-0.477163	-0.225865	NA	20		WDR62..284403.	0.337891	0.0215545	0.151609	0.0792021	0.142395	0.191921	0.0819444	0.191982	0.0189431	0.152621	0.0313838	0.086636	0.0393072
UID1787	WDR62..284403./1162	1162	1162-PPPAPPICLRRRTRLSTASEETVQNRVSLEK	284403	WDR62	0.875281	-0.431844	-0.762317	-0.825226	-0.198823	-0.803405	0.13133	0.259123	0.267667	-0.121668	-0.567695	0.228601	-0.622785	-0.790441	-0.451502	0.723626	0.729175	-0.428702	-0.829738	0.660516	-0.138669	-0.333587	-0.861869	0.377871	-0.88869	-0.0922902	-0.360676	-0.22752	28		WDR62..284403.	0.337891	0.0215545	0.151609	0.0792021	0.142395	0.191921	0.0819444	0.191982	0.0189431	0.152621	0.0313838	0.086636	0.0393072
UID1789	WDR62..284403./1163	1163	1163-TQPGVTVPAVSFPAPSPVEESALRLHGSAFR	284403	WDR62	-0.179622	0.33045	0.264422	0.667184	0.0237726	-0.244641	-0.042181	0.809476	0.547127	-0.777067	0.449666	0.93315	0.228655	0.267729	0.0164309	0.0744489	0.264257	-0.506182	-0.256063	0.471672	-0.435728	0.672924	-0.116383	0.0888739	0.372056	-0.179849	0.585806	0.422499	28		WDR62..284403.	0.337891	0.0215545	0.151609	0.0792021	0.142395	0.191921	0.0819444	0.191982	0.0189431	0.152621	0.0313838	0.086636	0.0393072
UID1790	WDR62..284403./1164	1164	1164-SLLEPTSGALGLLQGSPARWSEPWVPVEALP	284403	WDR62	-0.454488	0.23346	-0.118554	0.184702	0.022728	NA	-0.187301	0.334102	NA	-0.104568	NA	-0.40139	-0.35375	-0.390239	NA	NA	NA	NA	NA	0.119628	0.378819	0.096374	NA	-0.114646	-0.302007	NA	0.379145	NA	17		WDR62..284403.	0.337891	0.0215545	0.151609	0.0792021	0.142395	0.191921	0.0819444	0.191982	0.0189431	0.152621	0.0313838	0.086636	0.0393072
UID1791	WDR62..284403./1165	1165	1165-EGPIVATLAQPLRRPSSVGELASLGQELQAI	284403	WDR62	0.128721	-0.212059	-0.253963	-0.013954	-0.295391	-0.309568	0.194796	0.492159	0.0419749	-0.214171	-0.152174	0.584166	0.0524756	-0.221222	-0.370413	0.0335611	0.0101527	-0.272342	-0.628814	0.129919	-1.36352	-0.125169	-0.588548	0.405905	0.00840251	0.203083	0.235438	-0.026185	28		WDR62..284403.	0.337891	0.0215545	0.151609	0.0792021	0.142395	0.191921	0.0819444	0.191982	0.0189431	0.152621	0.0313838	0.086636	0.0393072
UID1792	WDR62..284403./1166	1166	1166-GPIVATLAQPLRRPSSVGELASLGQELQAIT	284403	WDR62	0.0133761	-0.084386	-0.292494	0.0380162	-0.219852	-0.424323	0.149495	0.344305	0.0168233	-0.26931	-0.20124	0.43208	0.0112642	-0.272139	-0.163605	0.124485	-0.206922	-0.367731	-0.714048	0.186512	-1.33926	-0.177188	-0.591904	0.466668	-0.0360781	0.231684	0.159299	-0.0564353	28		WDR62..284403.	0.337891	0.0215545	0.151609	0.0792021	0.142395	0.191921	0.0819444	0.191982	0.0189431	0.152621	0.0313838	0.086636	0.0393072
UID1794	WDR62..284403./1167	1167	1167-MEATASSRARISRSISLGDSEGPIVATLAQP	284403	WDR62	0.0839979	-0.172932	-0.281488	-0.111233	-0.529321	-0.00174284	0.585938	0.584186	0.103768	-0.331816	0.285012	0.809319	-0.157109	-0.55452	-0.60531	0.471172	0.484649	-0.376381	-0.764793	0.371107	-1.05588	-0.595747	-0.818614	0.202096	-0.288993	0.58844	0.341705	-0.148402	28		WDR62..284403.	0.337891	0.0215545	0.151609	0.0792021	0.142395	0.191921	0.0819444	0.191982	0.0189431	0.152621	0.0313838	0.086636	0.0393072
UID1796	WDR62..284403./1168	1168	1168-ARWSEPWVPVEALPPSPLELSRVGNILHRLQ	284403	WDR62	0.0610566	0.038163	0.0619164	0.169282	0.138572	-0.518817	0.129834	0.323449	-0.00686852	0.017825	0.00748237	0.615124	0.17861	-0.153581	-0.25704	0.262742	0.0309304	-0.37806	-0.181898	0.275184	-0.349911	-0.197288	-0.089052	-0.0290537	-0.159321	0.20847	0.179291	-0.0574156	28		WDR62..284403.	0.337891	0.0215545	0.151609	0.0792021	0.142395	0.191921	0.0819444	0.191982	0.0189431	0.152621	0.0313838	0.086636	0.0393072
UID1798	HNRNPR..10236./1169	1169	1169-IGVCISVANNRLFVGSIPKSKTKEQILEEFS;LGVCISVANNRLFVGSIPKNKTKENILEEFS	10236	HNRNPR	-0.42307	-0.8582	1.97264	-0.627992	-0.348561	-0.761029	-0.0911563	-0.269488	-0.608546	-0.415856	0.942581	-0.0343242	0.155089	0.812582	0.788602	-0.346303	0.441126	-0.101451	-0.593847	-0.531421	2.65232	-1.22121	-0.180949	-0.685144	-0.213296	-1.24339	-0.131042	-0.597516	28		HNRNPR..10236.	0.868098	0.920105	0.289502	0.812453	0.698704	0.454181	0.626432	0.582906	0.485351	0.826184	0.446048	0.31072	0.60792
UID1800	PRPF3..9129./1170	1170	1170-EVEEEPEVIPGPPSESPGMLTKLQIKQMMEA	9129	PRPF3	-0.333876	-0.207938	-0.0720129	-0.293478	-0.289056	0.0542614	-0.508569	-0.303096	-0.0108953	0.179179	-0.179131	0.150156	-0.470511	-0.188216	-0.535983	-0.398765	-0.278085	0.34313	-0.291595	-0.200763	-0.17025	-0.404507	-0.437357	-0.523388	-0.30828	-0.274879	-0.621711	-0.240751	28		PRPF3..9129.	0.990941	0.992079	0.77803	0.956852	0.941296	0.969141	0.943819	0.935056	0.887074	0.970281	0.990458	0.862233	0.939222
UID1801	PRPF3..9129./1171	1171	1171-WDEQTSNTKGDDDEESDEEAVKKTNKCVLVW	9129	PRPF3	-0.465207	-0.361685	-0.330301	0.320892	-0.0686855	0.0189869	0.01767	0.0151288	-0.0380171	-0.149538	-0.121193	0.0677881	-0.101595	-0.121902	-0.233655	-0.0860799	-0.339302	0.43004	-0.208133	-0.0017031	-0.14846	-0.472466	-0.230009	-0.123597	-0.142967	0.197934	0.0165127	-0.0686487	28		PRPF3..9129.	0.990941	0.992079	0.77803	0.956852	0.941296	0.969141	0.943819	0.935056	0.887074	0.970281	0.990458	0.862233	0.939222
UID1807	TPD52L2..7165./1172	1172	1172-KVVGDRENGSDNLPSSAGSGDKPLSDPAPF_	7165	TPD52L2	0.44225	-0.226774	0.388655	-0.277313	0.322808	-0.5337	-0.229639	-0.248628	-0.214528	0.403578	NA	-0.299646	-0.206472	0.0803666	-0.242532	0.00644875	NA	NA	NA	0.706271	0.492115	0.187654	NA	0.0824566	0.193653	0.361594	0.2264	-0.0221286	23		TPD52L2..7165.	0.105144	0.0350951	0.118114	0.0928802	0.0430386	0.0253446	0.0111567	0.0738154	0.0831878	0.0407714	0.652345	0.238109	0.0455293
UID1808	TPD52L2..7165./1173	1173	1173-GDRENGSDNLPSSAGSGDKPLSDPAPF____	7165	TPD52L2	0.575889	0.0688753	0.645538	-0.267767	0.509614	NA	-0.298799	-0.207254	NA	0.860761	NA	-0.468319	-0.262774	-0.202233	NA	NA	NA	NA	NA	0.704594	0.481229	0.293816	NA	0.350526	0.0401516	NA	0.305939	NA	17		TPD52L2..7165.	0.105144	0.0350951	0.118114	0.0928802	0.0430386	0.0253446	0.0111567	0.0738154	0.0831878	0.0407714	0.652345	0.238109	0.0455293
UID1809	TPD52L2..7165./1174	1174	1174-QDINLNSPNKGLLSDSMTDVPVDTGVAARTP	7165	TPD52L2	0.783842	-0.249071	0.192806	0.113097	0.0494556	0.134477	0.224245	0.211845	0.119666	0.157541	-0.0577277	0.0568698	0.122036	0.200178	0.00446669	0.0797501	0.480971	0.344803	0.906941	0.247308	0.597507	0.396518	0.00379038	0.181839	0.315791	0.437113	0.14015	0.169153	28		TPD52L2..7165.	0.105144	0.0350951	0.118114	0.0928802	0.0430386	0.0253446	0.0111567	0.0738154	0.0831878	0.0407714	0.652345	0.238109	0.0455293
UID1811	TPD52L2..7165./1176	1176	1176-HSISMPAMRNSATFKSFEDRVGTIKSKVVGD;ISRKLGDMRNSATFKSFEDRVGTIKSKVVGD	7165	TPD52L2	1.49045	0.309013	0.715281	-1.19009	0.911766	-1.21067	-3.09315	-0.288009	-1.45535	-1.49132	0.750669	-3.21962	0.567967	-0.175072	0.291352	-3.41858	-1.60297	-1.56204	0.0296674	-2.75114	0.69096	0.135531	0.100273	0.776243	1.10723	-0.691137	2.26935	-1.85404	28		TPD52L2..7165.	0.105144	0.0350951	0.118114	0.0928802	0.0430386	0.0253446	0.0111567	0.0738154	0.0831878	0.0407714	0.652345	0.238109	0.0455293
UID1815	TPD52L2..7165./1178	1178	1178-SQAGQKTSAALSTVGSAISRKLGDMRNSATF;SQAGQKTSAALSTVGSAISRKLGDMSSYSIR	7165	TPD52L2	0.847894	0.203912	0.732018	0.199391	0.32908	NA	0.201837	0.135214	NA	0.923918	0.522246	0.0309181	0.264995	0.154258	0.484126	0.422897	1.10824	0.537981	0.606771	0.223807	0.0725355	NA	0.351048	0.2488	0.458782	0.116653	0.100089	NA	24		TPD52L2..7165.	0.105144	0.0350951	0.118114	0.0928802	0.0430386	0.0253446	0.0111567	0.0738154	0.0831878	0.0407714	0.652345	0.238109	0.0455293
UID1816	TPD52L2..7165./1179	1179	1179-RKLGDMSSYSIRHSISMPAMRNSATFKSFED;SKKFGDMSYSIRHSISMPAMRNSPTFKSFEE	7165	TPD52L2	0.27056	-0.877627	0.73734	NA	0.519781	0.178435	0.253981	-0.167969	0.165704	1.92008	0.412732	-0.72066	0.34006	NA	0.541086	-0.037571	3.96235	0.00142717	0.119459	-0.0270228	NA	NA	0.72354	NA	0.20996	0.0467167	0.915827	NA	22		TPD52L2..7165.	0.105144	0.0350951	0.118114	0.0928802	0.0430386	0.0253446	0.0111567	0.0738154	0.0831878	0.0407714	0.652345	0.238109	0.0455293
UID1818	SYNJ1..8867./1181	1181	1181-FNLLAVSKAQLSVQTSPVPTPDPKRLIQLPS	8867	SYNJ1	0.150985	-0.33486	-0.421129	-0.14221	-0.398692	0.250427	-0.224364	NA	-0.49706	-0.341924	-0.4568	-0.243789	NA	-0.966812	-0.46248	1.07334	0.0441966	-0.369024	-0.229677	0.227891	-0.230375	-0.0658204	-0.156078	-0.0159283	-0.285753	0.0457344	-0.40368	-0.0874147	26		SYNJ1..8867.	0.00644	0.0201	0.00204	0.0167	0.0435	0.0396	0.00753	0.0125	0.0224	0.00336	0.0109	0.0123	0.00876
UID1819	SYNJ1..8867./1182	1182	1182-TSPPVDPFTTLASKASPTLDFTER_______	8867	SYNJ1	0.201616	-0.377138	0.188113	-0.187769	-0.0338618	-0.0907915	-0.0173488	-0.443465	-0.182854	-0.124823	-0.481297	-0.162568	-0.664489	-0.800966	-0.360952	1.31829	0.0987763	0.0676173	-0.0283457	0.4212	0.118254	0.212596	-0.0610989	-0.216347	-0.191356	-0.323439	-0.284515	-0.208231	28		SYNJ1..8867.	0.00644	0.0201	0.00204	0.0167	0.0435	0.0396	0.00753	0.0125	0.0224	0.00336	0.0109	0.0123	0.00876
UID1823	SYNJ1..8867./1185	1185	1185-MPPIPARSQSQENMRSSPNPFITGLTRTNPF	8867	SYNJ1	-0.0975926	-0.0515523	0.612683	0.0922106	0.502648	0.0467846	-0.750313	-0.788117	-0.161302	-0.406343	-0.455905	-0.421043	-0.588134	-0.712634	-0.362801	1.03858	0.0555489	-0.194223	-0.449844	-0.402215	0.366319	0.213987	-0.324636	0.252781	0.0850859	0.0871658	0.185118	-0.0678018	28		SYNJ1..8867.	0.00644	0.0201	0.00204	0.0167	0.0435	0.0396	0.00753	0.0125	0.0224	0.00336	0.0109	0.0123	0.00876
UID1824	SYNJ1..8867./1186	1186	1186-PPIPARSQSQENMRSSPNPFITGLTRTNPFS	8867	SYNJ1	NA	-0.156388	-0.0305376	0.367547	0.0654731	0.0711465	NA	-0.697687	-0.448672	-0.280139	-0.509253	-1.52881	-0.400779	-0.82624	-0.359218	1.04008	-0.103079	-0.218885	-0.298263	-0.656293	NA	-0.468838	-0.272555	0.664607	-0.0477371	0.0552216	NA	-0.693614	24		SYNJ1..8867.	0.00644	0.0201	0.00204	0.0167	0.0435	0.0396	0.00753	0.0125	0.0224	0.00336	0.0109	0.0123	0.00876
UID1825	SYNJ1..8867./1187	1187	1187-SSSGLGTSPSSSPRTSPCQSPTISEGPVPSL	8867	SYNJ1	0.384707	-0.227616	-0.397508	0.251815	-0.602711	-0.169928	0.202742	-0.0639772	-0.459295	-0.116593	-0.119736	0.292387	-0.520056	-0.379022	-0.215432	1.24265	-0.133175	0.000738939	-0.338211	0.777504	-0.0844453	-0.352465	0.0316031	0.0348468	0.547853	-0.45203	0.383624	0.0187693	28		SYNJ1..8867.	0.00644	0.0201	0.00204	0.0167	0.0435	0.0396	0.00753	0.0125	0.0224	0.00336	0.0109	0.0123	0.00876
UID1827	EIF4G3..8672./1188	1188	1188-QPIFTTAIDDRCELSSPREDTIPIPSLTSCT	8672	EIF4G3	0.111008	-0.123994	-0.0751282	-0.0625758	0.41691	0.447851	0.342203	0.375445	-0.453288	0.691246	0.119788	0.41075	-0.118006	-0.525886	-0.561334	1.33837	0.488619	-0.0819694	0.00384188	1.44733	-0.410357	-0.0230926	0.374436	-0.627633	0.0562062	0.537963	-0.040211	0.0772765	28		EIF4G3..8672.	0.15119	0.397861	0.0389821	0.048939	0.0365709	0.0317237	0.135821	0.0493906	0.0350685	0.197063	0.015343	0.0862644	0.0545097
UID1828	EIF4G3..8672./1189	1189	1189-ETTAIVSIAELPLPPSPTTVSSVARSTIAAP	8672	EIF4G3	0.0814679	0.373891	0.166551	-0.231831	-0.0045948	-0.108019	-0.0580602	0.180533	-0.436718	0.00390768	-0.0499959	-0.138631	-0.308367	-0.184637	-0.211433	-0.0539598	0.00973272	-0.4746	-0.144403	0.203359	-0.00860151	-0.0810299	-0.0454645	-0.38811	0.0378366	-0.00439072	0.152137	-0.468352	28		EIF4G3..8672.	0.15119	0.397861	0.0389821	0.048939	0.0365709	0.0317237	0.135821	0.0493906	0.0350685	0.197063	0.015343	0.0862644	0.0545097
UID1829	EIF4G3..8672./1190	1190	1190-LPSATARPNTFMRGGSSKDLLDNQSQEEQRR	8672	EIF4G3	-0.640662	-0.508955	0.51902	-0.429657	1.01769	1.02812	-0.6394	-1.07053	-0.680001	-1.27639	-0.821348	-1.41764	0.0188615	-0.863207	-1.40654	-0.377716	0.117761	0.0851247	-0.949086	0.0983083	-0.368593	-0.00378847	-0.202875	-1.19828	0.0572166	-1.16527	-0.735164	-0.867708	28		EIF4G3..8672.	0.15119	0.397861	0.0389821	0.048939	0.0365709	0.0317237	0.135821	0.0493906	0.0350685	0.197063	0.015343	0.0862644	0.0545097
UID1830	EIF4G3..8672./1191	1191	1191-PSATARPNTFMRGGSSKDLLDNQSQEEQRRE	8672	EIF4G3	NA	-0.491755	-0.0697923	NA	-0.753428	2.40558	0.219383	-0.355491	0.142751	-1.40209	-1.17835	NA	1.62857	NA	-1.5199	-0.813494	0.241464	-0.765228	-1.08913	NA	NA	NA	-0.0858448	NA	NA	-0.608677	NA	NA	17		EIF4G3..8672.	0.15119	0.397861	0.0389821	0.048939	0.0365709	0.0317237	0.135821	0.0493906	0.0350685	0.197063	0.015343	0.0862644	0.0545097
UID1831	EIF4G3..8672./1192	1192	1192-HNFLLEQKLDFIESDSPCSSEALSKKELSAE	8672	EIF4G3	0.283351	-0.0427101	0.0809142	0.320403	0.27877	0.623056	0.0707095	0.524357	-0.0469028	0.605145	0.0327862	0.285244	0.0200644	-0.431704	-0.379261	0.512566	0.421161	-0.39741	-0.108804	0.962551	-0.0959282	-0.0840298	0.396591	-0.223865	0.173869	0.556753	0.252356	-0.091231	28		EIF4G3..8672.	0.15119	0.397861	0.0389821	0.048939	0.0365709	0.0317237	0.135821	0.0493906	0.0350685	0.197063	0.015343	0.0862644	0.0545097
UID1833	EIF4G3..8672./1194	1194	1194-QTEEILDSQNLNSRRSPVPAQIAITVPKTWK	8672	EIF4G3	0.142337	0.01851	-0.173757	0.358558	-0.177821	0.818178	-0.0337769	0.369245	-0.505119	-0.0514716	-0.431422	-1.00586	-0.414227	-0.615229	-1.05687	0.437871	0.0889141	-0.427557	-0.383063	0.753791	-0.491969	-0.209684	0.0849493	-0.512278	0.0299555	-0.124511	-0.304783	-0.363908	28		EIF4G3..8672.	0.15119	0.397861	0.0389821	0.048939	0.0365709	0.0317237	0.135821	0.0493906	0.0350685	0.197063	0.015343	0.0862644	0.0545097
UID1834	EIF4G3..8672./1195	1195	1195-DQKQEEKPKPDPVLKSPSPVLRLVLSGEKKE	8672	EIF4G3	0.583861	-0.114311	-0.0591121	0.705947	0.256609	0.611137	-0.122755	0.191419	-0.548003	-0.420263	-0.211005	-0.349083	-0.273695	-0.391817	-0.13425	0.435909	0.102576	-0.298992	-0.37531	0.719215	-0.243715	NA	0.372263	-0.294205	0.131553	0.868271	-0.125131	NA	26		EIF4G3..8672.	0.15119	0.397861	0.0389821	0.048939	0.0365709	0.0317237	0.135821	0.0493906	0.0350685	0.197063	0.015343	0.0862644	0.0545097
UID1836	CBFA2T2..9139./1197	1197	1197-DTIAPEPPAKRVCTISPAPRHSPALTVPLMN	9139	CBFA2T2	0.27095	-0.209594	0.250597	1.23421	-1.08977	0.347463	0.0298872	0.0712671	0.393734	-0.128835	-0.153812	-0.284166	-0.0678039	-0.157704	-0.534548	0.536863	1.01379	-0.647244	0.0123692	0.399487	-0.59324	-0.536733	1.0819	-0.219747	0.13438	-0.305942	-0.20909	-0.295492	28		CBFA2T2..9139.	0.0522224	0.0217024	0.102884	0.0206129	0.0954931	0.0574301	0.0634728	0.0144431	0.152561	0.0554186	0.0720955	0.392215	0.0794275
UID1838	CBFA2T2..9139./1199	1199	1199-VGRGSSARSADCSVPSPALDKTSATTSRSST	9139	CBFA2T2	0.301154	NA	NA	0.762731	NA	-0.0142899	-0.0944576	0.236341	0.34054	0.196882	NA	0.0875187	0.107913	0.00073433	NA	NA	NA	-0.0165448	NA	0.0514622	-0.179005	NA	NA	-0.121213	0.077775	NA	0.224586	-0.326034	17		CBFA2T2..9139.	0.0522224	0.0217024	0.102884	0.0206129	0.0954931	0.0574301	0.0634728	0.0144431	0.152561	0.0554186	0.0720955	0.392215	0.0794275
UID1840	CBFA2T2..9139./1201	1201	1201-____________MPGSPVEVKIQSRSSPPTM	9139	CBFA2T2	0.492514	-0.345984	-0.0133858	1.05043	-0.882021	NA	-0.238693	0.0819597	NA	-0.0107214	0.320673	-0.357563	-0.0476336	-0.124539	-0.192255	0.89684	1.24942	0.298981	0.261978	-0.0741081	-0.161256	-0.186681	1.24127	0.16358	0.215974	-0.177348	0.0233581	NA	25		CBFA2T2..9139.	0.0522224	0.0217024	0.102884	0.0206129	0.0954931	0.0574301	0.0634728	0.0144431	0.152561	0.0554186	0.0720955	0.392215	0.0794275
UID1841	SUV39H1..6839./1202	1202	1202-STRMDSNFGLAGLPGSPKKRVRIECKCGTES	6839	SUV39H1	-0.379861	-0.205651	-0.215737	0.130401	-0.208343	-0.074869	-0.446589	-0.525416	-0.407586	-0.604603	-0.441325	-0.26918	-0.521134	0.558468	-0.671261	0.147927	0.490394	-0.264984	-0.224764	-0.0492056	-0.514387	-0.162586	-0.290172	0.0497659	-0.00316175	-0.418434	-0.877166	0.166911	28		SUV39H1..6839.	0.0150753	0.0111448	0.0428714	0.0111434	0.0856405	0.021131	0.0056199	0.033228	0.025512	0.01504	0.0177715	0.0449445	0.0101568
UID1842	HTRA2..27429./1203	1203	1203-AHVVADRRRVRVRLLSGDTYEAVVTAVDPVA	27429	HTRA2	-0.351613	0.898878	-0.236231	0.448704	0.226488	0.261244	NA	NA	0.511646	0.4204	NA	0.890449	NA	-0.313286	0.560385	0.86856	NA	NA	NA	0.872874	-0.193619	0.457651	NA	0.634439	0.634242	0.542946	-0.0752778	0.583976	20		HTRA2..27429.	0.0464919	0.406842	0.0298061	0.337009	0.192245	0.881677	0.266393	0.162234	0.0541702	0.0685457	0.0426034	0.0240023	0.082045
UID1845	KLF4..9314./1205	1205	1205-GSEYGSPSVISVSKGSPDGSHPVVVAPYNGG	9314	KLF4	0.151834	0.293667	0.490711	NA	0.37103	NA	NA	NA	NA	0.509123	0.7481	NA	NA	0.461235	0.700536	-0.115898	0.692882	1.73874	0.590034	NA	0.540644	0.678207	0.486317	NA	NA	0.622059	0.390896	NA	17		KLF4..9314.	0.169887	0.0332457	0.0314921	0.114419	0.0490275	0.04398	0.0445879	0.0331759	0.380481	0.228139	0.198236	0.45731	0.0979118
UID1847	OIP5..11339./1206	1206	1206-SFTTSMEWDTQVVKGSSPLGPAGLGAEEPAA	11339	OIP5	-0.263031	0.112174	0.00258398	-0.167788	-0.166167	0.0137321	0.206808	-0.233772	-0.0984015	-0.639165	-0.05319	-0.0596927	-0.32553	-0.0506013	-0.393009	0.0970273	-0.0399401	-0.161656	0.166292	-0.0945983	-0.613806	-0.221824	-0.0920482	-0.00611178	0.0355078	0.0307159	-0.501472	0.0414788	28		OIP5..11339.	0.969581	0.921784	0.947973	0.962421	0.953394	0.967333	0.961173	0.999606	0.909738	0.997808	0.929639	0.809199	0.979358
UID1848	OIP5..11339./1207	1207	1207-FTTSMEWDTQVVKGSSPLGPAGLGAEEPAAG	11339	OIP5	-0.335696	1.00976	0.0852928	0.0843768	0.0814385	0.000885169	0.171676	-0.217395	0.0819217	-0.444588	-0.0373857	-0.21908	-0.303197	0.0326614	-0.334055	0.0781932	-0.0570834	-0.309174	0.129687	0.0409017	-0.548905	-0.0415249	-0.138623	0.21032	0.0693817	0.294504	-0.5218	0.106835	28		OIP5..11339.	0.969581	0.921784	0.947973	0.962421	0.953394	0.967333	0.961173	0.999606	0.909738	0.997808	0.929639	0.809199	0.979358
UID1850	AKR7A2..8574./1209	1209	1209-EDKDGKQPVGRFFGNSWAETYRNRFWKEHHF	8574	AKR7A2	0.252224	-0.42971	0.37444	0.0872157	-0.11506	-0.515205	0.152006	-0.176534	-0.237679	-0.465388	0.0382814	0.304005	-0.67129	-0.307857	0.343215	0.715075	0.25399	NA	0.122356	0.113659	0.552316	0.322796	0.179255	0.0695982	0.145129	0.574869	0.114094	-0.0779715	27		AKR7A2..8574.	0.0471123	0.0467241	0.0266835	0.0153142	0.0607224	0.163057	0.0350391	0.0217148	0.0270931	0.0768874	0.0311307	0.175015	0.0500724
UID1852	EPB41L2..2037./1210	1210	1210-MTTEVGSVSEVKKDSSQLGTDATKEKPKEVA	2037	EPB41L2	-0.0553603	NA	NA	0.22378	-0.4579	0.0530853	0.0838242	-0.6503	0.483878	NA	NA	0.138415	0.600344	0.136986	0.69018	0.242289	NA	NA	NA	0.330097	0.352751	0.824001	NA	-0.119578	-0.592816	-0.570149	0.610162	0.724432	20		EPB41L2..2037.	0.00832133	0.0105834	0.0566496	0.00770055	0.0295637	0.0168026	0.0534731	0.0391581	0.0146534	0.0151424	0.0241044	0.0258586	0.0157205
UID1853	EPB41L2..2037./1211	1211	1211-PAAKVVEREEAVPEASPVTQAGASVITVETV	2037	EPB41L2	0.423545	0.590293	-0.54769	-0.866239	-0.200103	-0.432282	1.22726	-1.43828	0.804373	0.565194	0.574736	1.24484	0.557929	1.4356	1.33509	-0.39683	-0.71873	0.397713	-0.218403	0.277901	0.28361	0.7799	0.462684	-0.851596	-0.444591	-0.476063	0.0254896	1.65917	28		EPB41L2..2037.	0.00832133	0.0105834	0.0566496	0.00770055	0.0295637	0.0168026	0.0534731	0.0391581	0.0146534	0.0151424	0.0241044	0.0258586	0.0157205
UID1854	EPB41L2..2037./1212	1212	1212-KDERVITEEMNGKEISPGSGPGEIRKVEPVT	2037	EPB41L2	0.14424	0.78101	-0.205809	-0.488575	-0.157352	-0.125204	0.492557	-0.969001	0.39347	-0.214182	0.654606	1.47245	0.285044	1.0406	0.730634	-0.201104	-0.193909	0.57779	-0.297325	0.275266	-0.155412	0.563526	0.931106	-0.573034	-0.612114	-0.441812	0.139494	1.26836	28		EPB41L2..2037.	0.00832133	0.0105834	0.0566496	0.00770055	0.0295637	0.0168026	0.0534731	0.0391581	0.0146534	0.0151424	0.0241044	0.0258586	0.0157205
[truncated: 28,736 more rows]
[truncated: 19 more columns]
