# Supplementary material for: Integrative analysis of cancer dependency data and comprehensive phosphoproteomics data revealed the EPHA2-PARD3 axis as a cancer vulnerability in KRAS-mutant colorectal cancer
Source: Royal Society of Chemistry journal article supplement (doi:10.1039/d3mo00042g), 2023-05-16
Supplement: d3mo00042g7.xlsx [file d3mo00042g7.xlsx]

## Sheet: Table S5A
Table S5A: PTM-SEA results, related to Figure 5
			BRAF/ KRAS wt	BRAF/ KRAS wt	BRAF/ KRAS wt	BRAF/ KRAS wt	BRAF/ KRAS wt	BRAF/ KRAS wt	BRAF/ KRAS wt	BRAF/ KRAS wt	BRAF/ KRAS wt	BRAF mut	BRAF mut	BRAF mut	BRAF mut	BRAF mut	BRAF mut	BRAF mut	KRAS mut	KRAS mut	KRAS mut	KRAS mut	KRAS mut	KRAS mut	KRAS mut	KRAS mut	KRAS mut	KRAS mut	KRAS mut	KRAS mut	KRAS mut	KRAS mut	KRAS mut	KRAS mut	KRAS mut	KRAS mut		BRAF/ KRAS wt	BRAF/ KRAS wt	BRAF/ KRAS wt	BRAF/ KRAS wt	BRAF/ KRAS wt	BRAF/ KRAS wt	BRAF/ KRAS wt	BRAF/ KRAS wt	BRAF/ KRAS wt	BRAF mut	BRAF mut	BRAF mut
id	Signature.set.description	Signature.set.size	Signature.set.overlap.percent.C2BBe1	Signature.set.overlap.percent.CaR1	Signature.set.overlap.percent.CCK81	Signature.set.overlap.percent.CW2	Signature.set.overlap.percent.HT55	Signature.set.overlap.percent.NCIH508	Signature.set.overlap.percent.NCIH716	Signature.set.overlap.percent.SNUC1	Signature.set.overlap.percent.SW48	Signature.set.overlap.percent.COLO205	Signature.set.overlap.percent.HT115	Signature.set.overlap.percent.HT29	Signature.set.overlap.percent.LS411N	Signature.set.overlap.percent.MDST8	Signature.set.overlap.percent.RKO	Signature.set.overlap.percent.SW1417	Signature.set.overlap.percent.GP5d	Signature.set.overlap.percent.HCT116	Signature.set.overlap.percent.HCT15	Signature.set.overlap.percent.LoVo	Signature.set.overlap.percent.LS1034	Signature.set.overlap.percent.LS123	Signature.set.overlap.percent.LS180	Signature.set.overlap.percent.LS513	Signature.set.overlap.percent.NCIH747	Signature.set.overlap.percent.RCM1	Signature.set.overlap.percent.SKCO1	Signature.set.overlap.percent.SNUC2B	Signature.set.overlap.percent.SW1116	Signature.set.overlap.percent.SW1463	Signature.set.overlap.percent.SW620	Signature.set.overlap.percent.SW837	Signature.set.overlap.percent.SW948	Signature.set.overlap.percent.T84	Signature.set.overlap.percent.COLO320HSR	Signature.set.overlap.C2BBe1	Signature.set.overlap.CaR1	Signature.set.overlap.CCK81	Signature.set.overlap.CW2	Signature.set.overlap.HT55	Signature.set.overlap.NCIH508	Signature.set.overlap.NCIH716	Signature.set.overlap.SNUC1	Signature.set.overlap.SW48	Signature.set.overlap.COLO205	Signature.set.overlap.HT115	Signature.set.overlap.HT29
KINASE-PSP_LYN	n=73|LAT2_Y119|NMT1_Y180|SLC4A1_Y904|ABL1_Y393|YY1_Y8|AKAP8_Y53|FCGR2C_Y310|BCR_Y177|RGS16_Y177|BTK_Y223|SLC4A1_Y21|SLC4A1_Y8|AKAP8_Y51|FCGR2A_Y304|CSF2RB_Y882|CSF2RB_Y822|CD19_Y531|ABL1_Y139|LAT2_Y110|IRF5_Y313|TRIM28_Y517|CASP8_Y380|AKAP8_Y152|CSF2RB_Y466|CASP8_Y448|CD19_Y500|IRF5_Y335|AKAP8_Y150|LY96_Y131|YY1_Y383|PTPN6_Y536|SLAMF1_Y327|RGS16_Y168|SLC4A1_Y359|ABL1_Y128|ABL1_Y172|AKAP8_Y80|LAT2…	72	5.6	4.2	5.6	5.6	5.6	4.2	5.6	5.6	6.9	4.2	5.6	5.6	5.6	5.6	6.9	5.6	6.9	5.6	5.6	4.2	5.6	6.9	5.6	5.6	4.2	5.6	4.2	5.6	5.6	5.6	6.9	5.6	5.6	5.6	5.6	TASDGKLYVSSESRF-p;u|QKGQESEYGNITYPP-p;u|WASKDATYTSARTLL-p;u|IVINPNAYDNLAIYK-p;u	QKGQESEYGNITYPP-p;u|WASKDATYTSARTLL-p;u|KVEEPSIYESVRVHT-p;u	QKGQESEYGNITYPP-p;u|WASKDATYTSARTLL-p;u|KVEEPSIYESVRVHT-p;u|IVINPNAYDNLAIYK-p;u	TASDGKLYVSSESRF-p;u|QKGQESEYGNITYPP-p;u|WASKDATYTSARTLL-p;u|IVINPNAYDNLAIYK-p;u	QKGQESEYGNITYPP-p;u|WASKDATYTSARTLL-p;u|KVEEPSIYESVRVHT-p;u|IVINPNAYDNLAIYK-p;u	QKGQESEYGNITYPP-p;u|WASKDATYTSARTLL-p;u|KVEEPSIYESVRVHT-p;u	QKGQESEYGNITYPP-p;u|WASKDATYTSARTLL-p;u|KVEEPSIYESVRVHT-p;u|IVINPNAYDNLAIYK-p;u	TASDGKLYVSSESRF-p;u|QKGQESEYGNITYPP-p;u|WASKDATYTSARTLL-p;u|IVINPNAYDNLAIYK-p;u	WASKDATYTSARTLL-p;u|TASDGKLYVSSESRF-p;u|IVINPNAYDNLAIYK-p;u|QKGQESEYGNITYPP-p;u|KVEEPSIYESVRVHT-p;u	QKGQESEYGNITYPP-p;u|WASKDATYTSARTLL-p;u|KVEEPSIYESVRVHT-p;u	TASDGKLYVSSESRF-p;u|QKGQESEYGNITYPP-p;u|WASKDATYTSARTLL-p;u|IVINPNAYDNLAIYK-p;u	TASDGKLYVSSESRF-p;u|QKGQESEYGNITYPP-p;u|WASKDATYTSARTLL-p;u|IVINPNAYDNLAIYK-p;u
KINASE-PSP_EphA2/EPHA2	n=10|EPHA2_Y772|EPHA2_Y921|EPHA2_Y960|EPHA2_Y575|EPHA2_Y694|EPHA2_Y588|CLDN4_Y208|EPHA2_Y594|EPHA2_Y628|EPHA2_Y735	10	60	70	70	50	70	70	70	50	60	70	70	70	50	70	60	50	60	70	70	70	70	60	70	70	70	70	70	60	60	70	60	70	60	60	70	EDDPEATYTTSGGKI-p;u|TYVDPHTYEDPNQAV-p;u|RQSPEDVYFSKSEQL-p;u|KYLANMNYVHRDLAA-p;u|ESIKMQQYTEHFMAA-p;u|GHQKRIAYSLLGLKD-p;u	KYLANMNYVHRDLAA-p;u|GHQKRIAYSLLGLKD-p;u|RQSPEDVYFSKSEQL-p;u|EDDPEATYTTSGGKI-p;u|TYVDPHTYEDPNQAV-p;u|ESIKMQQYTEHFMAA-p;u|QLKPLKTYVDPHTYE-p;u	EDDPEATYTTSGGKI-p;u|TYVDPHTYEDPNQAV-p;u|RQSPEDVYFSKSEQL-p;u|QLKPLKTYVDPHTYE-p;u|GHQKRIAYSLLGLKD-p;u|ESIKMQQYTEHFMAA-p;u|KYLANMNYVHRDLAA-p;u	EDDPEATYTTSGGKI-p;u|KYLANMNYVHRDLAA-p;u|TYVDPHTYEDPNQAV-p;u|RQSPEDVYFSKSEQL-p;u|GHQKRIAYSLLGLKD-p;u	KYLANMNYVHRDLAA-p;u|GHQKRIAYSLLGLKD-p;u|RQSPEDVYFSKSEQL-p;u|ESIKMQQYTEHFMAA-p;u|TYVDPHTYEDPNQAV-p;u|EDDPEATYTTSGGKI-p;u|QLKPLKTYVDPHTYE-p;u	KYLANMNYVHRDLAA-p;u|EDDPEATYTTSGGKI-p;u|TYVDPHTYEDPNQAV-p;u|ESIKMQQYTEHFMAA-p;u|RQSPEDVYFSKSEQL-p;u|QLKPLKTYVDPHTYE-p;u|GHQKRIAYSLLGLKD-p;u	KYLANMNYVHRDLAA-p;u|ESIKMQQYTEHFMAA-p;u|EDDPEATYTTSGGKI-p;u|GHQKRIAYSLLGLKD-p;u|RQSPEDVYFSKSEQL-p;u|QLKPLKTYVDPHTYE-p;u|TYVDPHTYEDPNQAV-p;u	KYLANMNYVHRDLAA-p;u|GHQKRIAYSLLGLKD-p;u|RQSPEDVYFSKSEQL-p;u|EDDPEATYTTSGGKI-p;u|TYVDPHTYEDPNQAV-p;u	KYLANMNYVHRDLAA-p;u|TYVDPHTYEDPNQAV-p;u|GHQKRIAYSLLGLKD-p;u|EDDPEATYTTSGGKI-p;u|ESIKMQQYTEHFMAA-p;u|RQSPEDVYFSKSEQL-p;u	KYLANMNYVHRDLAA-p;u|RQSPEDVYFSKSEQL-p;u|GHQKRIAYSLLGLKD-p;u|EDDPEATYTTSGGKI-p;u|ESIKMQQYTEHFMAA-p;u|TYVDPHTYEDPNQAV-p;u|QLKPLKTYVDPHTYE-p;u	ESIKMQQYTEHFMAA-p;u|KYLANMNYVHRDLAA-p;u|EDDPEATYTTSGGKI-p;u|TYVDPHTYEDPNQAV-p;u|RQSPEDVYFSKSEQL-p;u|GHQKRIAYSLLGLKD-p;u|QLKPLKTYVDPHTYE-p;u	KYLANMNYVHRDLAA-p;u|GHQKRIAYSLLGLKD-p;u|TYVDPHTYEDPNQAV-p;u|EDDPEATYTTSGGKI-p;u|QLKPLKTYVDPHTYE-p;u|ESIKMQQYTEHFMAA-p;u|RQSPEDVYFSKSEQL-p;u
KINASE-PSP_Src/SRC	n=423|CASP8_Y397|PTEN_Y155|GJA1_Y265|SPTAN1_Y1073|PTEN_Y377|GAPDH_Y42|FLT4_Y830|HRAS_Y96|THRAP3_Y344|GSN_Y465|CDCP1_Y734|HNF4A_Y288|GRK2_Y13|SHC1_Y194|GRIN2A_Y1325|STAT3_Y68|CDCP1_Y743|KIF11_Y211|ATG9A_Y8|GTF2I_Y248|TRPV1_Y200|PLCG2_Y753|BDKRB2_Y347|CDH2_Y884|WNK4_Y1164|CAV1_Y14|CHKA_Y197|MUC1_Y1229|SHC1_Y427|GAB1_Y242|AKAP8_Y53|CHN2_Y21|CCR7_Y155|KHSRP_Y583|HNRNPK_Y234|ITGB7_Y758|SFPQ_Y691|HNRNP…	417	10.1	10.1	10.6	8.9	9.8	10.1	11.3	8.9	9.8	10.1	10.8	10.1	8.9	11.5	11	8.9	9.8	10.6	9.8	9.4	11.3	11	10.3	11.5	10.1	11.3	9.8	10.1	7.9	11.3	11	11.5	10.1	8.4	9.8	RQEDGGVYSSSGLKQ-p;u|QKGQESEYGNITYPP-p;u|SSEPVGIYQGFEKKT-p;u|QGRYYEGYYAAGPGY-p;u|GRYYEGYYAAGPGYG-p;u|MQDNSGTYGKIWEGS-p;u|SKAQQGLYQVPGPSP-p;u|NKSESVVYADIRKN_-p;u|KGDKQVEYLDLDLDS-p;u|LFKEENPYARFENN_-p;u|GSVQNPVYHNQPLNP-p;u|EKIGEGTYGVVYKGR-p;u|GQTVDDPYATFVKML-p;u|PQSSSPVYGSSAKTS-p;u|ASDTDSSYCIPTAGM-p;u|HFNKGPSYGLSAEVK-p;u|DSKVDLIYQNTTAMT-p;u|PIGNQHIYQPVGKPD-p;u|ASVDSSLYNLPRSYS-p;u|FGGEPLSYTRFSLAR-p;u…	KVEEPSIYESVRVHT-p;u|SSTDRSPYEKVSAGN-p;u|LFMDDDSYSHHSGLE-p;u|VDSEGHLYTVPIREQ-p;u|HSTPPSAYGSVKAYT-p;u|GSVQNPVYHNQPLNP-p;u|ASVDSSLYNLPRSYS-p;u|DVYEEDSYVKRSQGR-p;u|ASDTDSSYCIPTAGM-p;u|ELFDDPSYVNVQNLD-p;u|VTQVSSAYQKTVPVE-p;u|KGDKQVEYLDLDLDS-p;u|QGRYYEGYYAAGPGY-p;u|NKSESVVYADIRKN_-p;u|KGYSDEIYVVPDDSQ-p;u|PFLLDEDYEKVLGYV-p;u|QKGQESEYGNITYPP-p;u|PPTPGNTYQIPRTFP-p;u|GRYYEGYYAAGPGYG-p;u|QSKDSNPYATLPRAS-p;u…	SSTDRSPYEKVSAGN-p;u|QKGQESEYGNITYPP-p;u|KADGGAEYATYQTKS-p;u|GRYYEGYYAAGPGYG-p;u|QGRYYEGYYAAGPGY-p;u|EKIGEGTYGVVYKGR-p;u|ASDTDSSYCIPTAGM-p;u|EEPPDHQYYNDFPGK-p;u|EPPDHQYYNDFPGKE-p;u|NKSESVVYADIRKN_-p;u|ELFDDPSYVNVQNLD-p;u|RNEGVATYAAAVLFR-p;u|PFLLDEDYEKVLGYV-p;u|ASVDSSLYNLPRSYS-p;u|MQDNSGTYGKIWEGS-p;u|GSVQNPVYHNQPLNP-p;u|GQTVDDPYATFVKML-p;u|SSEPVGIYQGFEKKT-p;u|GPGTPAGYGRGREEY-p;u|DSKVDLIYQNTTAMT-p;u…	RQEDGGVYSSSGLKQ-p;u|GLINKKCYEMASHLR-p;u|YRGRGRGYYQGGGGR-p;u|EEPPDHQYYNDFPGK-p;u|EPPDHQYYNDFPGKE-p;u|ELFDDPSYVNVQNLD-p;u|GSVQNPVYHNQPLNP-p;u|KGDKQVEYLDLDLDS-p;u|QGRYYEGYYAAGPGY-p;u|GRYYEGYYAAGPGYG-p;u|FGGEPLSYTRFSLAR-p;u|DRSNDKVYENVTGLV-p;u|YIDAFSDYANFK___-p;u|AIRNTNEYTEGPTVV-p;u|EKIGEGTYGVVYKGR-p;u|KADGGAEYATYQTKS-p;u|ASDTDSSYCIPTAGM-p;u|SSEPVGIYQGFEKKT-p;u|HSTPPSAYGSVKAYT-p;u|PIGNQHIYQPVGKPD-p;u…	SSTDRSPYEKVSAGN-p;u|MQDNSGTYGKIWEGS-p;u|ASVDSSLYNLPRSYS-p;u|KGDKQVEYLDLDLDS-p;u|KADGGAEYATYQTKS-p;u|MELQTYRYHGHSMSD-p;u|LFITEEDYQALRTSI-p;u|QKGQESEYGNITYPP-p;u|SSEPVGIYQGFEKKT-p;u|GSVQNPVYHNQPLNP-p;u|GLINKKCYEMASHLR-p;u|KVEEPSIYESVRVHT-p;u|ELFDDPSYVNVQNLD-p;u|EEPPDHQYYNDFPGK-p;u|EPPDHQYYNDFPGKE-p;u|ASDTDSSYCIPTAGM-p;u|HSTPPSAYGSVKAYT-p;u|KGYSDEIYVVPDDSQ-p;u|VTQVSSAYQKTVPVE-p;u|NKSESVVYADIRKN_-p;u…	ASVDSSLYNLPRSYS-p;u|SSTDRSPYEKVSAGN-p;u|VTQVSSAYQKTVPVE-p;u|ASDTDSSYCIPTAGM-p;u|DVYEEDSYVKRSQGR-p;u|KGYSDEIYVVPDDSQ-p;u|ELFDDPSYVNVQNLD-p;u|EEPPDHQYYNDFPGK-p;u|EPPDHQYYNDFPGKE-p;u|KGDKQVEYLDLDLDS-p;u|NKSESVVYADIRKN_-p;u|MELQTYRYHGHSMSD-p;u|QKGQESEYGNITYPP-p;u|SSEPVGIYQGFEKKT-p;u|PPTPGNTYQIPRTFP-p;u|GQTVDDPYATFVKML-p;u|PFLLDEDYEKVLGYV-p;u|QGRYYEGYYAAGPGY-p;u|RQEDGGVYSSSGLKQ-p;u|FGGEPLSYTRFSLAR-p;u…	DVYEEDSYVKRSQGR-p;u|GLINKKCYEMASHLR-p;u|VTQVSSAYQKTVPVE-p;u|HFNKGPSYGLSAEVK-p;u|NKSESVVYADIRKN_-p;u|FGGEPLSYTRFSLAR-p;u|RQEDGGVYSSSGLKQ-p;u|QSKDSNPYATLPRAS-p;u|PPTPGNTYQIPRTFP-p;u|KGYSDEIYVVPDDSQ-p;u|MELQTYRYHGHSMSD-p;u|KGDKQVEYLDLDLDS-p;u|DSKVDLIYQNTTAMT-p;u|SSEPVGIYQGFEKKT-p;u|KVEEPSIYESVRVHT-p;u|EKIGEGTYGVVYKGR-p;u|TLKDQLIYNLLKEEQ-p;u|ASDTDSSYCIPTAGM-p;u|SKAVCSTYLQSRYYR-p;u|EEPPDHQYYNDFPGK-p;u…	MQDNSGTYGKIWEGS-p;u|SSEPVGIYQGFEKKT-p;u|QKGQESEYGNITYPP-p;u|KADGGAEYATYQTKS-p;u|HSTPPSAYGSVKAYT-p;u|NKSESVVYADIRKN_-p;u|PFLLDEDYEKVLGYV-p;u|EEPPDHQYYNDFPGK-p;u|EPPDHQYYNDFPGKE-p;u|YIDAFSDYANFK___-p;u|ELFDDPSYVNVQNLD-p;u|GSVQNPVYHNQPLNP-p;u|GLINKKCYEMASHLR-p;u|ASDTDSSYCIPTAGM-p;u|LFKEENPYARFENN_-p;u|KGDKQVEYLDLDLDS-p;u|AIRNTNEYTEGPTVV-p;u|GQTVDDPYATFVKML-p;u|KGYSDEIYVVPDDSQ-p;u|IPHDGNLYPRLYPEL-p;u…	VDSEGHLYTVPIREQ-p;u|GSVQNPVYHNQPLNP-p;u|LFITEEDYQALRTSI-p;u|KGYSDEIYVVPDDSQ-p;u|YIDAFSDYANFK___-p;u|RQEDGGVYSSSGLKQ-p;u|DVVDADEYLIPQQGF-p;u|SKAVCSTYLQSRYYR-p;u|EEPPDHQYYNDFPGK-p;u|EPPDHQYYNDFPGKE-p;u|MQDNSGTYGKIWEGS-p;u|ASDTDSSYCIPTAGM-p;u|ELFDDPSYVNVQNLD-p;u|KGDKQVEYLDLDLDS-p;u|GLINKKCYEMASHLR-p;u|PFLLDEDYEKVLGYV-p;u|IPHDGNLYPRLYPEL-p;u|NKSESVVYADIRKN_-p;u|HSTPPSAYGSVKAYT-p;u|YRGRGRGYYQGGGGR-p;u…	TLKDQLIYNLLKEEQ-p;u|SSTDRSPYEKVSAGN-p;u|SSEPVGIYQGFEKKT-p;u|KADGGAEYATYQTKS-p;u|MELQTYRYHGHSMSD-p;u|EEPPDHQYYNDFPGK-p;u|EPPDHQYYNDFPGKE-p;u|HSTPPSAYGSVKAYT-p;u|YIDAFSDYANFK___-p;u|QKGQESEYGNITYPP-p;u|KGYSDEIYVVPDDSQ-p;u|ELFDDPSYVNVQNLD-p;u|YRGRGRGYYQGGGGR-p;u|NKSESVVYADIRKN_-p;u|IPHDGNLYPRLYPEL-p;u|PFLLDEDYEKVLGYV-p;u|KGDKQVEYLDLDLDS-p;u|VTQVSSAYQKTVPVE-p;u|FGGEPLSYTRFSLAR-p;u|SKAVCSTYLQSRYYR-p;u…	HFNKGPSYGLSAEVK-p;u|GLINKKCYEMASHLR-p;u|NKSESVVYADIRKN_-p;u|DSKVDLIYQNTTAMT-p;u|ELFDDPSYVNVQNLD-p;u|MELQTYRYHGHSMSD-p;u|GPGTPAGYGRGREEY-p;u|KADGGAEYATYQTKS-p;u|EEPPDHQYYNDFPGK-p;u|EPPDHQYYNDFPGKE-p;u|TLKDQLIYNLLKEEQ-p;u|SSTDRSPYEKVSAGN-p;u|KGDKQVEYLDLDLDS-p;u|QKGQESEYGNITYPP-p;u|MQDNSGTYGKIWEGS-p;u|PFLLDEDYEKVLGYV-p;u|YRGRGRGYYQGGGGR-p;u|SKAVCSTYLQSRYYR-p;u|GQTVDDPYATFVKML-p;u|ASDTDSSYCIPTAGM-p;u…	QGRYYEGYYAAGPGY-p;u|ASVDSSLYNLPRSYS-p;u|GRYYEGYYAAGPGYG-p;u|ASDTDSSYCIPTAGM-p;u|ELFDDPSYVNVQNLD-p;u|PQSSSPVYGSSAKTS-p;u|KGDKQVEYLDLDLDS-p;u|NKSESVVYADIRKN_-p;u|KGYSDEIYVVPDDSQ-p;u|YMEDSTYYKASKGKL-p;u|SSTDRSPYEKVSAGN-p;u|RYMEDSTYYKASKGK-p;u|MQDNSGTYGKIWEGS-p;u|QKGQESEYGNITYPP-p;u|EEPPDHQYYNDFPGK-p;u|EPPDHQYYNDFPGKE-p;u|GLINKKCYEMASHLR-p;u|PIGNQHIYQPVGKPD-p;u|GSVQNPVYHNQPLNP-p;u|HSTPPSAYGSVKAYT-p;u…
KINASE-PSP_Met/MET	n=20|PARP1_Y907|SHC1_Y427|MET_Y1356|MST1R_Y1353|PTK2_Y925|PTK2_Y5|MET_Y1349|PTK2_Y397|MET_Y1365|PTK2_Y861|PTK2_Y577|PTK2_Y194|MET_Y1234|MST1R_Y1360|MST1R_Y1238|PTK2_Y576|PTK2_Y407|MET_Y1230|MET_Y1235|MST1R_Y1239	20	45	45	45	45	40	45	45	45	45	45	45	45	45	45	45	45	45	45	40	45	45	45	45	45	45	45	45	45	35	45	45	45	45	35	40	DILDREYYSVQQHRH-p;u|PIGNQHIYQPVGKPD-p;u|ELFDDPSYVNVQNLD-p;u|YMEDSTYYKASKGKL-p;u|DRSNDKVYENVTGLV-p;u|RDILDREYYSVQQHR-p;u|RYMEDSTYYKASKGK-p;u|RDMYDKEYYSVHNKT-p;u|DMYDKEYYSVHNKTG-p;u	ELFDDPSYVNVQNLD-p;u|DILDREYYSVQQHRH-p;u|DMYDKEYYSVHNKTG-p;u|RDILDREYYSVQQHR-p;u|RDMYDKEYYSVHNKT-p;u|DRSNDKVYENVTGLV-p;u|RYMEDSTYYKASKGK-p;u|YMEDSTYYKASKGKL-p;u|PIGNQHIYQPVGKPD-p;u	DMYDKEYYSVHNKTG-p;u|RDMYDKEYYSVHNKT-p;u|ELFDDPSYVNVQNLD-p;u|RDILDREYYSVQQHR-p;u|DILDREYYSVQQHRH-p;u|DRSNDKVYENVTGLV-p;u|RYMEDSTYYKASKGK-p;u|YMEDSTYYKASKGKL-p;u|PIGNQHIYQPVGKPD-p;u	ELFDDPSYVNVQNLD-p;u|DRSNDKVYENVTGLV-p;u|DILDREYYSVQQHRH-p;u|PIGNQHIYQPVGKPD-p;u|YMEDSTYYKASKGKL-p;u|RDILDREYYSVQQHR-p;u|RYMEDSTYYKASKGK-p;u|RDMYDKEYYSVHNKT-p;u|DMYDKEYYSVHNKTG-p;u	DMYDKEYYSVHNKTG-p;u|RDILDREYYSVQQHR-p;u|ELFDDPSYVNVQNLD-p;u|RDMYDKEYYSVHNKT-p;u|DILDREYYSVQQHRH-p;u|DRSNDKVYENVTGLV-p;u|RYMEDSTYYKASKGK-p;u|YMEDSTYYKASKGKL-p;u	RDILDREYYSVQQHR-p;u|DILDREYYSVQQHRH-p;u|DMYDKEYYSVHNKTG-p;u|ELFDDPSYVNVQNLD-p;u|RDMYDKEYYSVHNKT-p;u|DRSNDKVYENVTGLV-p;u|PIGNQHIYQPVGKPD-p;u|RYMEDSTYYKASKGK-p;u|YMEDSTYYKASKGKL-p;u	DILDREYYSVQQHRH-p;u|RDILDREYYSVQQHR-p;u|ELFDDPSYVNVQNLD-p;u|DRSNDKVYENVTGLV-p;u|RDMYDKEYYSVHNKT-p;u|DMYDKEYYSVHNKTG-p;u|PIGNQHIYQPVGKPD-p;u|RYMEDSTYYKASKGK-p;u|YMEDSTYYKASKGKL-p;u	DILDREYYSVQQHRH-p;u|RDILDREYYSVQQHR-p;u|ELFDDPSYVNVQNLD-p;u|DMYDKEYYSVHNKTG-p;u|RDMYDKEYYSVHNKT-p;u|DRSNDKVYENVTGLV-p;u|RYMEDSTYYKASKGK-p;u|PIGNQHIYQPVGKPD-p;u|YMEDSTYYKASKGKL-p;u	ELFDDPSYVNVQNLD-p;u|DILDREYYSVQQHRH-p;u|DMYDKEYYSVHNKTG-p;u|RDMYDKEYYSVHNKT-p;u|DRSNDKVYENVTGLV-p;u|RDILDREYYSVQQHR-p;u|PIGNQHIYQPVGKPD-p;u|RYMEDSTYYKASKGK-p;u|YMEDSTYYKASKGKL-p;u	ELFDDPSYVNVQNLD-p;u|DILDREYYSVQQHRH-p;u|RDILDREYYSVQQHR-p;u|PIGNQHIYQPVGKPD-p;u|DRSNDKVYENVTGLV-p;u|YMEDSTYYKASKGKL-p;u|RYMEDSTYYKASKGK-p;u|DMYDKEYYSVHNKTG-p;u|RDMYDKEYYSVHNKT-p;u	RDILDREYYSVQQHR-p;u|DILDREYYSVQQHRH-p;u|ELFDDPSYVNVQNLD-p;u|RDMYDKEYYSVHNKT-p;u|DMYDKEYYSVHNKTG-p;u|PIGNQHIYQPVGKPD-p;u|DRSNDKVYENVTGLV-p;u|RYMEDSTYYKASKGK-p;u|YMEDSTYYKASKGKL-p;u	DMYDKEYYSVHNKTG-p;u|ELFDDPSYVNVQNLD-p;u|RDMYDKEYYSVHNKT-p;u|RDILDREYYSVQQHR-p;u|DILDREYYSVQQHRH-p;u|YMEDSTYYKASKGKL-p;u|RYMEDSTYYKASKGK-p;u|PIGNQHIYQPVGKPD-p;u|DRSNDKVYENVTGLV-p;u
KINASE-PSP_CK1D/CSNK1D	n=73|ZNF322_S396|PER2_S662|DCK_T72|MAPT_S202|EPAS1_T528|TARDBP_S393|DVL2_S143|TARDBP_S410|MDM2_T351|PPP5C_T362|MDM2_S220|MDM2_S386|BACE1_S498|MDM2_S262|CDH1_S844|DCK_S15|TARDBP_S333|TARDBP_S395|MDM2_S342|APC_S1507|MDM2_S260|MDM2_S166|MDM2_S350|DVL2_T224|TP53_S9|TARDBP_S403|MDM2_T419|PER2_S668|DCK_S74|TP53_T18|TARDBP_S404|MAPT_S396|PSEN2_S330|MAPT_S404|TP53_S20|MDM2_S373|EPAS1_S383|CTNNB1_S45|MDM2…	73	9.6	8.2	8.2	11	9.6	8.2	5.5	9.6	11	8.2	6.8	9.6	11	6.8	8.2	11	11	8.2	9.6	9.6	5.5	8.2	9.6	6.8	8.2	5.5	8.2	9.6	8.2	5.5	8.2	6.8	9.6	9.6	9.6	SCPSFSASSEGTRIK-p;u|QDEFEELTMSQKNGG-p;u|SRDESTDSGLSMSSY-p;u|EFEELTMSQKNGGNV-p;u|GAEIVYKSPVVSGDT-p;u|SGYSSPGSPGTPGSR-p;u|PVVSGDTSPRHLSNV-p;u	QDEFEELTMSQKNGG-p;u|EFEELTMSQKNGGNV-p;u|SELSDTDSGCCLGQS-p;u|SGYSSPGSPGTPGSR-p;u|GAEIVYKSPVVSGDT-p;u|PVVSGDTSPRHLSNV-p;u	SCPSFSASSEGTRIK-p;u|EFEELTMSQKNGGNV-p;u|QDEFEELTMSQKNGG-p;u|GAEIVYKSPVVSGDT-p;u|SGYSSPGSPGTPGSR-p;u|PVVSGDTSPRHLSNV-p;u	QDEFEELTMSQKNGG-p;u|PVVSGDTSPRHLSNV-p;u|GAEIVYKSPVVSGDT-p;u|SGYSSPGSPGTPGSR-p;u|EFEELTMSQKNGGNV-p;u|SCPSFSASSEGTRIK-p;u|SRDESTDSGLSMSSY-p;u|SELSDTDSGCCLGQS-p;u	QDEFEELTMSQKNGG-p;u|EFEELTMSQKNGGNV-p;u|SCPSFSASSEGTRIK-p;u|SELSDTDSGCCLGQS-p;u|SGYSSPGSPGTPGSR-p;u|GAEIVYKSPVVSGDT-p;u|PVVSGDTSPRHLSNV-p;u	QDEFEELTMSQKNGG-p;u|EFEELTMSQKNGGNV-p;u|GAEIVYKSPVVSGDT-p;u|SGYSSPGSPGTPGSR-p;u|SELSDTDSGCCLGQS-p;u|PVVSGDTSPRHLSNV-p;u	PVVSGDTSPRHLSNV-p;u|SGYSSPGSPGTPGSR-p;u|EFEELTMSQKNGGNV-p;u|QDEFEELTMSQKNGG-p;u	QDEFEELTMSQKNGG-p;u|SCPSFSASSEGTRIK-p;u|EFEELTMSQKNGGNV-p;u|SRDESTDSGLSMSSY-p;u|GAEIVYKSPVVSGDT-p;u|SGYSSPGSPGTPGSR-p;u|PVVSGDTSPRHLSNV-p;u	QDEFEELTMSQKNGG-p;u|EFEELTMSQKNGGNV-p;u|SCPSFSASSEGTRIK-p;u|SRDESTDSGLSMSSY-p;u|SELSDTDSGCCLGQS-p;u|GAEIVYKSPVVSGDT-p;u|SGYSSPGSPGTPGSR-p;u|PVVSGDTSPRHLSNV-p;u	SCPSFSASSEGTRIK-p;u|QDEFEELTMSQKNGG-p;u|EFEELTMSQKNGGNV-p;u|GAEIVYKSPVVSGDT-p;u|SGYSSPGSPGTPGSR-p;u|PVVSGDTSPRHLSNV-p;u	EFEELTMSQKNGGNV-p;u|QDEFEELTMSQKNGG-p;u|SRDESTDSGLSMSSY-p;u|SGYSSPGSPGTPGSR-p;u|PVVSGDTSPRHLSNV-p;u	SRDESTDSGLSMSSY-p;u|QDEFEELTMSQKNGG-p;u|EFEELTMSQKNGGNV-p;u|SELSDTDSGCCLGQS-p;u|GAEIVYKSPVVSGDT-p;u|SGYSSPGSPGTPGSR-p;u|PVVSGDTSPRHLSNV-p;u
KINASE-PSP_Brk/PTK6	n=16|PTK6_Y447|CTNNB1_Y142|PTK6_Y342|STAP2_Y250|BCAR1_Y664|CTNNB1_Y333|ARAP1_Y231|BCAR1_Y165|CTNNB1_Y331|AKT1_Y326|AKT1_Y315|STAT5B_Y699|PXN_Y118|CTNNB1_Y64|PXN_Y31|ARHGAP5_Y1109	16	31.2	31.2	31.2	31.2	31.2	31.2	31.2	25	31.2	25	31.2	31.2	31.2	31.2	31.2	31.2	31.2	25	31.2	31.2	31.2	31.2	31.2	31.2	31.2	31.2	25	31.2	25	31.2	31.2	31.2	31.2	25	31.2	VGEEEHVYSFPNKQK-p;u|PFLLDEDYEKVLGYV-p;u|PEFDDSDYDEVPEEG-p;u|KGYSDEIYVVPDDSQ-p;u|RLSSFTSYENPT___-p;u	RLSSFTSYENPT___-p;u|KGYSDEIYVVPDDSQ-p;u|PFLLDEDYEKVLGYV-p;u|PEFDDSDYDEVPEEG-p;u|VGEEEHVYSFPNKQK-p;u	PFLLDEDYEKVLGYV-p;u|PEFDDSDYDEVPEEG-p;u|KGYSDEIYVVPDDSQ-p;u|RLSSFTSYENPT___-p;u|VGEEEHVYSFPNKQK-p;u	PFLLDEDYEKVLGYV-p;u|VGEEEHVYSFPNKQK-p;u|PEFDDSDYDEVPEEG-p;u|KGYSDEIYVVPDDSQ-p;u|RLSSFTSYENPT___-p;u	KGYSDEIYVVPDDSQ-p;u|PFLLDEDYEKVLGYV-p;u|RLSSFTSYENPT___-p;u|VGEEEHVYSFPNKQK-p;u|PEFDDSDYDEVPEEG-p;u	RLSSFTSYENPT___-p;u|KGYSDEIYVVPDDSQ-p;u|PFLLDEDYEKVLGYV-p;u|PEFDDSDYDEVPEEG-p;u|VGEEEHVYSFPNKQK-p;u	RLSSFTSYENPT___-p;u|KGYSDEIYVVPDDSQ-p;u|PFLLDEDYEKVLGYV-p;u|PEFDDSDYDEVPEEG-p;u|VGEEEHVYSFPNKQK-p;u	VGEEEHVYSFPNKQK-p;u|KGYSDEIYVVPDDSQ-p;u|RLSSFTSYENPT___-p;u|PFLLDEDYEKVLGYV-p;u	KGYSDEIYVVPDDSQ-p;u|PFLLDEDYEKVLGYV-p;u|PEFDDSDYDEVPEEG-p;u|VGEEEHVYSFPNKQK-p;u|RLSSFTSYENPT___-p;u	VGEEEHVYSFPNKQK-p;u|KGYSDEIYVVPDDSQ-p;u|RLSSFTSYENPT___-p;u|PFLLDEDYEKVLGYV-p;u	RLSSFTSYENPT___-p;u|PFLLDEDYEKVLGYV-p;u|PEFDDSDYDEVPEEG-p;u|KGYSDEIYVVPDDSQ-p;u|VGEEEHVYSFPNKQK-p;u	KGYSDEIYVVPDDSQ-p;u|RLSSFTSYENPT___-p;u|VGEEEHVYSFPNKQK-p;u|PFLLDEDYEKVLGYV-p;u|PEFDDSDYDEVPEEG-p;u
KINASE-PSP_Fyn/FYN	n=113|GRIN2A_Y1118|ITCH_Y420|NMT1_Y180|CD5_Y453|FYB1_Y651|FYB1_Y625|GRIN2A_Y1325|FYB1_Y771|PLCG2_Y753|ABL1_Y393|PLXNA2_Y1605|IFITM3_Y20|CAV1_Y14|CHN2_Y21|ARHGAP33_Y406|GRIN2A_Y1246|BCR_Y177|CD3E_Y188|GRB10_Y67|FYB1_Y559|SKAP1_Y232|GRIN2A_Y1105|JUP_Y133|CRMP1_Y504|NFE2L2_Y576|SCN5A_Y1494|PLXNA1_Y1679|PECAM1_Y690|MAP2_Y67|MAP2_Y50|PLCG2_Y759|RPS6KA3_Y529|RPS6KA3_Y580|PROM1_Y852|PECAM1_Y713|ABL1_Y13…	109	7.3	7.3	6.4	5.5	8.3	7.3	8.3	5.5	8.3	7.3	9.2	8.3	5.5	9.2	9.2	5.5	8.3	8.3	8.3	4.6	8.3	9.2	8.3	9.2	7.3	8.3	7.3	7.3	7.3	8.3	9.2	9.2	7.3	6.4	8.3	AAGTQQPYTDGVRME-p;u|TASDGKLYVSSESRF-p;u|VGEEEHVYSFPNKQK-p;u|DSKVDLIYQNTTAMT-p;u|SKMQQNGYENPTYKF-p;u|EGEEDTEYMTPSSRP-p;u|EAPVYSVYSKLHPPA-p;u|VDSEGHLYTVPIREQ-p;u	VDSEGHLYTVPIREQ-p;u|SKRKGHEYTNIKYSL-p;u|SKMQQNGYENPTYKF-p;u|AAGTQQPYTDGVRME-p;u|QFNQRFIYGNQDLFA-p;u|LVNEAPVYSVYSKLH-p;u|EAPVYSVYSKLHPPA-p;u|VGEEEHVYSFPNKQK-p;u	AAGTQQPYTDGVRME-p;u|EAPVYSVYSKLHPPA-p;u|DSKVDLIYQNTTAMT-p;u|QFNQRFIYGNQDLFA-p;u|SKMQQNGYENPTYKF-p;u|VGEEEHVYSFPNKQK-p;u|VDSEGHLYTVPIREQ-p;u	EGEEDTEYMTPSSRP-p;u|SKMQQNGYENPTYKF-p;u|EAPVYSVYSKLHPPA-p;u|VGEEEHVYSFPNKQK-p;u|TASDGKLYVSSESRF-p;u|VDSEGHLYTVPIREQ-p;u	SLNQSSGYRYGTDPT-p;u|EGEEDTEYMTPSSRP-p;u|SKRKGHEYTNIKYSL-p;u|LVNEAPVYSVYSKLH-p;u|AAGTQQPYTDGVRME-p;u|EAPVYSVYSKLHPPA-p;u|VGEEEHVYSFPNKQK-p;u|VDSEGHLYTVPIREQ-p;u|SKMQQNGYENPTYKF-p;u	AAGTQQPYTDGVRME-p;u|SKRKGHEYTNIKYSL-p;u|SKMQQNGYENPTYKF-p;u|LVNEAPVYSVYSKLH-p;u|EAPVYSVYSKLHPPA-p;u|QFNQRFIYGNQDLFA-p;u|VDSEGHLYTVPIREQ-p;u|VGEEEHVYSFPNKQK-p;u	AAGTQQPYTDGVRME-p;u|SKRKGHEYTNIKYSL-p;u|SKMQQNGYENPTYKF-p;u|EAPVYSVYSKLHPPA-p;u|DSKVDLIYQNTTAMT-p;u|LVNEAPVYSVYSKLH-p;u|QFNQRFIYGNQDLFA-p;u|VDSEGHLYTVPIREQ-p;u|VGEEEHVYSFPNKQK-p;u	EGEEDTEYMTPSSRP-p;u|EAPVYSVYSKLHPPA-p;u|TASDGKLYVSSESRF-p;u|SKMQQNGYENPTYKF-p;u|VGEEEHVYSFPNKQK-p;u|VDSEGHLYTVPIREQ-p;u	VDSEGHLYTVPIREQ-p;u|TASDGKLYVSSESRF-p;u|SLNQSSGYRYGTDPT-p;u|AAGTQQPYTDGVRME-p;u|SKMQQNGYENPTYKF-p;u|EAPVYSVYSKLHPPA-p;u|SKRKGHEYTNIKYSL-p;u|EGEEDTEYMTPSSRP-p;u|VGEEEHVYSFPNKQK-p;u	LVNEAPVYSVYSKLH-p;u|EAPVYSVYSKLHPPA-p;u|AAGTQQPYTDGVRME-p;u|QFNQRFIYGNQDLFA-p;u|SKMQQNGYENPTYKF-p;u|SKRKGHEYTNIKYSL-p;u|VDSEGHLYTVPIREQ-p;u|VGEEEHVYSFPNKQK-p;u	AAGTQQPYTDGVRME-p;u|DSKVDLIYQNTTAMT-p;u|SKRKGHEYTNIKYSL-p;u|EAPVYSVYSKLHPPA-p;u|LVNEAPVYSVYSKLH-p;u|EGEEDTEYMTPSSRP-p;u|SKMQQNGYENPTYKF-p;u|TASDGKLYVSSESRF-p;u|VDSEGHLYTVPIREQ-p;u|VGEEEHVYSFPNKQK-p;u	SKRKGHEYTNIKYSL-p;u|EGEEDTEYMTPSSRP-p;u|VGEEEHVYSFPNKQK-p;u|AAGTQQPYTDGVRME-p;u|LVNEAPVYSVYSKLH-p;u|EAPVYSVYSKLHPPA-p;u|SKMQQNGYENPTYKF-p;u|TASDGKLYVSSESRF-p;u|VDSEGHLYTVPIREQ-p;u
KINASE-PSP_Syk/SYK	n=50|SLC4A1_Y904|SHC1_Y317|FCGR2C_Y310|SLC4A1_Y21|SLC4A1_Y8|PLCG1_Y771|BLNK_Y96|PLCG2_Y759|HCLS1_Y378|SHC1_Y239|FCGR2A_Y304|IKZF1_S361|CFTR_Y512|LAT2_Y233|IKZF1_S364|CTTN_Y421|ARHGDIB_Y24|BLNK_Y84|PLCG1_Y783|STAT5A_Y694|LAT2_Y193|CBL_Y700|FCGR2C_Y287|SLC4A1_Y359|SNCA_Y133|SHC1_Y240|LAT2_Y136|SNCA_Y136|DUSP3_Y138|SYK_Y352|SNCA_Y125|BLNK_Y178|FCGR2A_Y281|BTK_Y551|GCSAM_Y128|SYK_Y348|CBL_Y774|DUSP3_…	49	12.2	8.2	8.2	12.2	16.3	8.2	8.2	12.2	16.3	8.2	12.2	12.2	12.2	16.3	16.3	12.2	16.3	16.3	16.3	8.2	8.2	16.3	12.2	16.3	8.2	8.2	8.2	12.2	12.2	8.2	16.3	16.3	12.2	16.3	16.3	IGTAEPDYGALYEGR-p;u|RLPSSPVYEDAASFK-p;u|ELFDDPSYVNVQNLD-p;u|EEPPDHQYYNDFPGK-p;u|EPPDHQYYNDFPGKE-p;u|EGEEDTEYMTPSSRP-p;u	ELFDDPSYVNVQNLD-p;u|EEPPDHQYYNDFPGK-p;u|EPPDHQYYNDFPGKE-p;u|RLPSSPVYEDAASFK-p;u	ELFDDPSYVNVQNLD-p;u|EEPPDHQYYNDFPGK-p;u|EPPDHQYYNDFPGKE-p;u|RLPSSPVYEDAASFK-p;u	EEPPDHQYYNDFPGK-p;u|EPPDHQYYNDFPGKE-p;u|ELFDDPSYVNVQNLD-p;u|EGEEDTEYMTPSSRP-p;u|RLPSSPVYEDAASFK-p;u|IGTAEPDYGALYEGR-p;u	ALRADENYYKAQTHG-p;u|LRADENYYKAQTHGK-p;u|ELFDDPSYVNVQNLD-p;u|EEPPDHQYYNDFPGK-p;u|EPPDHQYYNDFPGKE-p;u|EGEEDTEYMTPSSRP-p;u|RLPSSPVYEDAASFK-p;u|IGTAEPDYGALYEGR-p;u	ELFDDPSYVNVQNLD-p;u|EEPPDHQYYNDFPGK-p;u|EPPDHQYYNDFPGKE-p;u|RLPSSPVYEDAASFK-p;u	ELFDDPSYVNVQNLD-p;u|EEPPDHQYYNDFPGK-p;u|EPPDHQYYNDFPGKE-p;u|RLPSSPVYEDAASFK-p;u	EGEEDTEYMTPSSRP-p;u|EEPPDHQYYNDFPGK-p;u|EPPDHQYYNDFPGKE-p;u|ELFDDPSYVNVQNLD-p;u|RLPSSPVYEDAASFK-p;u|IGTAEPDYGALYEGR-p;u	EEPPDHQYYNDFPGK-p;u|EPPDHQYYNDFPGKE-p;u|ELFDDPSYVNVQNLD-p;u|RLPSSPVYEDAASFK-p;u|IGTAEPDYGALYEGR-p;u|ALRADENYYKAQTHG-p;u|LRADENYYKAQTHGK-p;u|EGEEDTEYMTPSSRP-p;u	ELFDDPSYVNVQNLD-p;u|EEPPDHQYYNDFPGK-p;u|EPPDHQYYNDFPGKE-p;u|RLPSSPVYEDAASFK-p;u	ELFDDPSYVNVQNLD-p;u|RLPSSPVYEDAASFK-p;u|EEPPDHQYYNDFPGK-p;u|EPPDHQYYNDFPGKE-p;u|EGEEDTEYMTPSSRP-p;u|IGTAEPDYGALYEGR-p;u	ELFDDPSYVNVQNLD-p;u|EGEEDTEYMTPSSRP-p;u|RLPSSPVYEDAASFK-p;u|EEPPDHQYYNDFPGK-p;u|EPPDHQYYNDFPGKE-p;u|IGTAEPDYGALYEGR-p;u
KINASE-PSP_Abl/ABL1	n=142|SNCA_Y39|NFKBIA_Y305|YAP1_Y407|TBX21_Y305|CAT_Y231|MYLK_Y1449|ABL1_Y393|TP73_Y99|CAV1_Y14|RAD51_Y315|FOXA1_Y464|ESR1_Y52|ATR_Y310|BCR_Y177|PLCG1_Y1003|MET_Y1356|BTK_Y223|CDC73_Y315|EGFR_Y1016|RACK1_Y52|ABL2_Y261|STK3_Y81|PLCG1_Y771|PLK1_Y217|SRCIN1_Y396|SNW1_Y292|MET_Y1349|PIK3AP1_Y570|CEBPB_Y78|HRAS_Y137|MYC_Y74|MDM4_Y55|JUN_Y170|PIK3AP1_Y513|PDGFRB_Y970|KAT5_Y294|CTTN_Y486|MYC_Y32|TP63_Y1…	141	9.9	7.1	7.1	9.9	9.9	7.1	7.1	9.2	9.9	7.1	9.9	9.9	9.9	9.9	11.3	9.9	9.9	9.2	9.9	7.1	7.1	11.3	9.9	9.9	7.1	7.1	7.1	9.9	7.8	7.1	11.3	9.9	9.9	5.7	9.9	QERPGNFYVSSESIR-p;u|IGTAEPDYGALYEGR-p;u|PPTVPNDYMTSPARL-p;u|QKRVPNAYDKTALAL-p;u|VGEEEHVYSFPNKQK-p;u|SGLSMSSYSVPRTPD-p;u|VDPGERLYDLNMPAY-p;u|LVKGEGLYADPYGLL-p;u|RNEGVATYAAAVLFR-p;u|STAENAEYLRVAPQS-p;u|MLPESTVYGDVDLSN-p;u|AKVEFGVYESGPRKS-p;u|RIPGGNIYISPLKSP-p;u|VDSEGHLYTVPIREQ-p;u	VDSEGHLYTVPIREQ-p;u|STAENAEYLRVAPQS-p;u|TFLPVPEYINQSVPK-p;u|QERPGNFYVSSESIR-p;u|VDPGERLYDLNMPAY-p;u|PPTVPNDYMTSPARL-p;u|VGEEEHVYSFPNKQK-p;u|RNEGVATYAAAVLFR-p;u|RIPGGNIYISPLKSP-p;u|LVKGEGLYADPYGLL-p;u	PPTVPNDYMTSPARL-p;u|RNEGVATYAAAVLFR-p;u|VDPGERLYDLNMPAY-p;u|QERPGNFYVSSESIR-p;u|STAENAEYLRVAPQS-p;u|QKRVPNAYDKTALAL-p;u|RIPGGNIYISPLKSP-p;u|VGEEEHVYSFPNKQK-p;u|LVKGEGLYADPYGLL-p;u|VDSEGHLYTVPIREQ-p;u	VDPGERLYDLNMPAY-p;u|PPTVPNDYMTSPARL-p;u|SGLSMSSYSVPRTPD-p;u|VGEEEHVYSFPNKQK-p;u|STAENAEYLRVAPQS-p;u|MLPESTVYGDVDLSN-p;u|IGTAEPDYGALYEGR-p;u|AKVEFGVYESGPRKS-p;u|TFLPVPEYINQSVPK-p;u|QKRVPNAYDKTALAL-p;u|QERPGNFYVSSESIR-p;u|RIPGGNIYISPLKSP-p;u|LVKGEGLYADPYGLL-p;u|VDSEGHLYTVPIREQ-p;u	PPTVPNDYMTSPARL-p;u|STAENAEYLRVAPQS-p;u|QERPGNFYVSSESIR-p;u|TFLPVPEYINQSVPK-p;u|QKRVPNAYDKTALAL-p;u|MLPESTVYGDVDLSN-p;u|IGTAEPDYGALYEGR-p;u|VGEEEHVYSFPNKQK-p;u|VDPGERLYDLNMPAY-p;u|VDSEGHLYTVPIREQ-p;u|DVVDADEYLIPQQGF-p;u|RNEGVATYAAAVLFR-p;u|RIPGGNIYISPLKSP-p;u|LVKGEGLYADPYGLL-p;u	QERPGNFYVSSESIR-p;u|PPTVPNDYMTSPARL-p;u|TFLPVPEYINQSVPK-p;u|STAENAEYLRVAPQS-p;u|RNEGVATYAAAVLFR-p;u|VDPGERLYDLNMPAY-p;u|LVKGEGLYADPYGLL-p;u|VDSEGHLYTVPIREQ-p;u|RIPGGNIYISPLKSP-p;u|VGEEEHVYSFPNKQK-p;u	PPTVPNDYMTSPARL-p;u|QERPGNFYVSSESIR-p;u|LVKGEGLYADPYGLL-p;u|VDSEGHLYTVPIREQ-p;u|RNEGVATYAAAVLFR-p;u|STAENAEYLRVAPQS-p;u|VDPGERLYDLNMPAY-p;u|RIPGGNIYISPLKSP-p;u|QKRVPNAYDKTALAL-p;u|VGEEEHVYSFPNKQK-p;u	PPTVPNDYMTSPARL-p;u|AKVEFGVYESGPRKS-p;u|QERPGNFYVSSESIR-p;u|VDPGERLYDLNMPAY-p;u|STAENAEYLRVAPQS-p;u|MLPESTVYGDVDLSN-p;u|SGLSMSSYSVPRTPD-p;u|QKRVPNAYDKTALAL-p;u|LVKGEGLYADPYGLL-p;u|IGTAEPDYGALYEGR-p;u|VGEEEHVYSFPNKQK-p;u|RIPGGNIYISPLKSP-p;u|VDSEGHLYTVPIREQ-p;u	LVKGEGLYADPYGLL-p;u|VDSEGHLYTVPIREQ-p;u|VDPGERLYDLNMPAY-p;u|STAENAEYLRVAPQS-p;u|DVVDADEYLIPQQGF-p;u|TFLPVPEYINQSVPK-p;u|QERPGNFYVSSESIR-p;u|PPTVPNDYMTSPARL-p;u|MLPESTVYGDVDLSN-p;u|SGLSMSSYSVPRTPD-p;u|QKRVPNAYDKTALAL-p;u|IGTAEPDYGALYEGR-p;u|AKVEFGVYESGPRKS-p;u|VGEEEHVYSFPNKQK-p;u	QERPGNFYVSSESIR-p;u|PPTVPNDYMTSPARL-p;u|LVKGEGLYADPYGLL-p;u|VDPGERLYDLNMPAY-p;u|RIPGGNIYISPLKSP-p;u|QKRVPNAYDKTALAL-p;u|STAENAEYLRVAPQS-p;u|VDSEGHLYTVPIREQ-p;u|VGEEEHVYSFPNKQK-p;u|RNEGVATYAAAVLFR-p;u	QERPGNFYVSSESIR-p;u|AKVEFGVYESGPRKS-p;u|PPTVPNDYMTSPARL-p;u|STAENAEYLRVAPQS-p;u|SGLSMSSYSVPRTPD-p;u|QKRVPNAYDKTALAL-p;u|VDPGERLYDLNMPAY-p;u|MLPESTVYGDVDLSN-p;u|VDSEGHLYTVPIREQ-p;u|VGEEEHVYSFPNKQK-p;u|RIPGGNIYISPLKSP-p;u|IGTAEPDYGALYEGR-p;u|RNEGVATYAAAVLFR-p;u|LVKGEGLYADPYGLL-p;u	VGEEEHVYSFPNKQK-p;u|STAENAEYLRVAPQS-p;u|QERPGNFYVSSESIR-p;u|SGLSMSSYSVPRTPD-p;u|PPTVPNDYMTSPARL-p;u|AKVEFGVYESGPRKS-p;u|TFLPVPEYINQSVPK-p;u|VDPGERLYDLNMPAY-p;u|MLPESTVYGDVDLSN-p;u|LVKGEGLYADPYGLL-p;u|RIPGGNIYISPLKSP-p;u|VDSEGHLYTVPIREQ-p;u|IGTAEPDYGALYEGR-p;u|RNEGVATYAAAVLFR-p;u
KINASE-PSP_CK1A/CSNK1A1	n=108|SLC4A1_S303|FOXG1_S19|YWHAQ_S232|TARDBP_S379|FOXO4_S268|MDM4_S289|KCNIP3_S63|TARDBP_S393|CARD11_S615|ATF1_S47|TARDBP_S410|RAPGEF2_S1248|LGALS3_S6|TARDBP_S387|NFATC3_S211|TARDBP_S347|JADE1_S18|BACE1_S498|CTPS2_S568|CDH1_S844|LGALS3_S12|CREB1_S111|TARDBP_T116|TARDBP_S395|TARDBP_S273|ERG_S45|APC_S1507|PRKN_S378|CREB1_S156|LRP6_T1493|FOXO1_S325|VHL_S72|RAPGEF2_S1244|TARDBP_S403|FADD_S194|SQSTM1…	108	8.3	10.2	10.2	10.2	8.3	10.2	8.3	8.3	8.3	9.3	6.5	8.3	10.2	7.4	5.6	10.2	8.3	10.2	8.3	12	8.3	5.6	8.3	7.4	10.2	8.3	9.3	8.3	8.3	8.3	5.6	7.4	8.3	8.3	8.3	TIAESEDSQESVDSV-p;u|LSSSDRYSDASDDSF-p;u|EDQDELSSLLQVPLV-p;u|DEEDLVDSLSEGDAY-p;u|EDLVDSLSEGDAYPN-p;u|EKNEGSESAPEGQAQ-p;u|ETNVKMESEGGADDS-p;u|SEGGADDSAEEGDLL-p;u|EGEDDRDSANGEDDS-p;u	QISTIAESEDSQESV-p;u|TIAESEDSQESVDSV-p;u|LSSSDRYSDASDDSF-p;u|ETNVKMESEGGADDS-p;u|FKSIMKKSPFSGPTD-p;u|ESEDSQESVDSVTDS-p;u|SEGGADDSAEEGDLL-p;u|EGEDDRDSANGEDDS-p;u|CGSSGYFSSSPTLSS-p;u|EDQDELSSLLQVPLV-p;u|EKNEGSESAPEGQAQ-p;u	CGSSGYFSSSPTLSS-p;u|SEGGADDSAEEGDLL-p;u|ETNVKMESEGGADDS-p;u|EGEDDRDSANGEDDS-p;u|LSSSDRYSDASDDSF-p;u|EDQDELSSLLQVPLV-p;u|EKNEGSESAPEGQAQ-p;u|DEEDLVDSLSEGDAY-p;u|EDLVDSLSEGDAYPN-p;u|TIAESEDSQESVDSV-p;u|FKSIMKKSPFSGPTD-p;u	LSSSDRYSDASDDSF-p;u|ESEDSQESVDSVTDS-p;u|QISTIAESEDSQESV-p;u|EKNEGSESAPEGQAQ-p;u|TIAESEDSQESVDSV-p;u|EGEDDRDSANGEDDS-p;u|EDQDELSSLLQVPLV-p;u|SEGGADDSAEEGDLL-p;u|ETNVKMESEGGADDS-p;u|DEEDLVDSLSEGDAY-p;u|EDLVDSLSEGDAYPN-p;u	TIAESEDSQESVDSV-p;u|EDQDELSSLLQVPLV-p;u|ESEDSQESVDSVTDS-p;u|LSSSDRYSDASDDSF-p;u|QISTIAESEDSQESV-p;u|EGEDDRDSANGEDDS-p;u|SEGGADDSAEEGDLL-p;u|ETNVKMESEGGADDS-p;u|EKNEGSESAPEGQAQ-p;u	ESEDSQESVDSVTDS-p;u|QISTIAESEDSQESV-p;u|TIAESEDSQESVDSV-p;u|EKNEGSESAPEGQAQ-p;u|LSSSDRYSDASDDSF-p;u|CGSSGYFSSSPTLSS-p;u|EDQDELSSLLQVPLV-p;u|SEGGADDSAEEGDLL-p;u|ETNVKMESEGGADDS-p;u|FKSIMKKSPFSGPTD-p;u|EGEDDRDSANGEDDS-p;u	CGSSGYFSSSPTLSS-p;u|LSSSDRYSDASDDSF-p;u|TIAESEDSQESVDSV-p;u|ETNVKMESEGGADDS-p;u|EGEDDRDSANGEDDS-p;u|SEGGADDSAEEGDLL-p;u|FKSIMKKSPFSGPTD-p;u|EDQDELSSLLQVPLV-p;u|EKNEGSESAPEGQAQ-p;u	EDQDELSSLLQVPLV-p;u|LSSSDRYSDASDDSF-p;u|TIAESEDSQESVDSV-p;u|EGEDDRDSANGEDDS-p;u|EKNEGSESAPEGQAQ-p;u|DEEDLVDSLSEGDAY-p;u|EDLVDSLSEGDAYPN-p;u|SEGGADDSAEEGDLL-p;u|ETNVKMESEGGADDS-p;u	TIAESEDSQESVDSV-p;u|QISTIAESEDSQESV-p;u|ESEDSQESVDSVTDS-p;u|EGEDDRDSANGEDDS-p;u|EKNEGSESAPEGQAQ-p;u|EDQDELSSLLQVPLV-p;u|LSSSDRYSDASDDSF-p;u|SEGGADDSAEEGDLL-p;u|ETNVKMESEGGADDS-p;u	CGSSGYFSSSPTLSS-p;u|LSSSDRYSDASDDSF-p;u|EKNEGSESAPEGQAQ-p;u|EDQDELSSLLQVPLV-p;u|FKSIMKKSPFSGPTD-p;u|DEEDLVDSLSEGDAY-p;u|EDLVDSLSEGDAYPN-p;u|ETNVKMESEGGADDS-p;u|EGEDDRDSANGEDDS-p;u|SEGGADDSAEEGDLL-p;u	LSSSDRYSDASDDSF-p;u|EGEDDRDSANGEDDS-p;u|TIAESEDSQESVDSV-p;u|EDQDELSSLLQVPLV-p;u|SEGGADDSAEEGDLL-p;u|EKNEGSESAPEGQAQ-p;u|ETNVKMESEGGADDS-p;u	EGEDDRDSANGEDDS-p;u|SEGGADDSAEEGDLL-p;u|EDQDELSSLLQVPLV-p;u|ETNVKMESEGGADDS-p;u|QISTIAESEDSQESV-p;u|ESEDSQESVDSVTDS-p;u|LSSSDRYSDASDDSF-p;u|TIAESEDSQESVDSV-p;u|EKNEGSESAPEGQAQ-p;u
KINASE-PSP_Lck/LCK	n=82|PRDX1_Y194|SH2D2A_Y290|CD5_Y453|MED28_Y64|PLCG2_Y753|IL2RB_Y418|SHC1_Y317|CD247_Y142|SSBP3_Y25|CHN2_Y153|ZAP70_Y315|CD33_Y340|CCDC50_Y304|ZAP70_Y493|LCK_Y505|VAV1_Y160|IL2RB_Y536|PLCG2_Y759|PTPN6_Y564|SHC1_Y239|LCP2_Y145|ZAP70_Y178|VAV1_Y142|PECAM1_Y713|ZAP70_Y474|IL2RB_Y384|SSBP3_Y23|SH2D2A_Y280|VAV1_Y174|THEMIS_Y541|MAPK14_Y323|STAT2_Y690|STAT5A_Y694|SLAMF1_Y307|ADAM15_Y715|ZAP70_Y492|PTPN…	82	8.5	8.5	8.5	8.5	9.8	8.5	8.5	8.5	9.8	8.5	8.5	8.5	8.5	9.8	9.8	8.5	9.8	9.8	9.8	8.5	8.5	9.8	8.5	9.8	8.5	8.5	8.5	8.5	7.3	8.5	9.8	9.8	8.5	9.8	9.8	QKGQESEYGNITYPP-p;u|RLIEDNEYTAREGAK-p;u|ELFDDPSYVNVQNLD-p;u|EEPPDHQYYNDFPGK-p;u|EPPDHQYYNDFPGKE-p;u|EGEEDTEYMTPSSRP-p;u|FTATEGQYQPQP___-p;u	KVEEPSIYESVRVHT-p;u|ELFDDPSYVNVQNLD-p;u|QKGQESEYGNITYPP-p;u|EEPPDHQYYNDFPGK-p;u|EPPDHQYYNDFPGKE-p;u|RLIEDNEYTAREGAK-p;u|FTATEGQYQPQP___-p;u	QKGQESEYGNITYPP-p;u|RLIEDNEYTAREGAK-p;u|EEPPDHQYYNDFPGK-p;u|EPPDHQYYNDFPGKE-p;u|ELFDDPSYVNVQNLD-p;u|FTATEGQYQPQP___-p;u|KVEEPSIYESVRVHT-p;u	EEPPDHQYYNDFPGK-p;u|EPPDHQYYNDFPGKE-p;u|ELFDDPSYVNVQNLD-p;u|EGEEDTEYMTPSSRP-p;u|FTATEGQYQPQP___-p;u|QKGQESEYGNITYPP-p;u|RLIEDNEYTAREGAK-p;u	QKGQESEYGNITYPP-p;u|KVEEPSIYESVRVHT-p;u|ELFDDPSYVNVQNLD-p;u|EEPPDHQYYNDFPGK-p;u|EPPDHQYYNDFPGKE-p;u|EGEEDTEYMTPSSRP-p;u|RLIEDNEYTAREGAK-p;u|FTATEGQYQPQP___-p;u	ELFDDPSYVNVQNLD-p;u|EEPPDHQYYNDFPGK-p;u|EPPDHQYYNDFPGKE-p;u|QKGQESEYGNITYPP-p;u|KVEEPSIYESVRVHT-p;u|RLIEDNEYTAREGAK-p;u|FTATEGQYQPQP___-p;u	KVEEPSIYESVRVHT-p;u|EEPPDHQYYNDFPGK-p;u|EPPDHQYYNDFPGKE-p;u|QKGQESEYGNITYPP-p;u|ELFDDPSYVNVQNLD-p;u|FTATEGQYQPQP___-p;u|RLIEDNEYTAREGAK-p;u	EGEEDTEYMTPSSRP-p;u|QKGQESEYGNITYPP-p;u|EEPPDHQYYNDFPGK-p;u|EPPDHQYYNDFPGKE-p;u|RLIEDNEYTAREGAK-p;u|ELFDDPSYVNVQNLD-p;u|FTATEGQYQPQP___-p;u	EEPPDHQYYNDFPGK-p;u|EPPDHQYYNDFPGKE-p;u|FTATEGQYQPQP___-p;u|ELFDDPSYVNVQNLD-p;u|RLIEDNEYTAREGAK-p;u|EGEEDTEYMTPSSRP-p;u|QKGQESEYGNITYPP-p;u|KVEEPSIYESVRVHT-p;u	FTATEGQYQPQP___-p;u|RLIEDNEYTAREGAK-p;u|EEPPDHQYYNDFPGK-p;u|EPPDHQYYNDFPGKE-p;u|QKGQESEYGNITYPP-p;u|ELFDDPSYVNVQNLD-p;u|KVEEPSIYESVRVHT-p;u	ELFDDPSYVNVQNLD-p;u|EEPPDHQYYNDFPGK-p;u|EPPDHQYYNDFPGKE-p;u|QKGQESEYGNITYPP-p;u|EGEEDTEYMTPSSRP-p;u|FTATEGQYQPQP___-p;u|RLIEDNEYTAREGAK-p;u	ELFDDPSYVNVQNLD-p;u|EGEEDTEYMTPSSRP-p;u|QKGQESEYGNITYPP-p;u|EEPPDHQYYNDFPGK-p;u|EPPDHQYYNDFPGKE-p;u|RLIEDNEYTAREGAK-p;u|FTATEGQYQPQP___-p;u
KINASE-PSP_Etk/BMX	n=19|FGFR1_Y654|PTK2_Y925|FGFR1_Y653|TNK2_Y860|PTK2_Y861|BCAR1_Y12|PTK2_Y441|BAK1_Y108|PTK2_Y577|PTK2_Y1007|PTK2_Y194|PAK1_Y153|RUFY1_Y389|PTK2_Y898|TNK2_Y859|PTK2_Y576|RUFY1_Y400|MET_Y1235|PTK2_Y742	19	26.3	31.6	26.3	26.3	26.3	31.6	31.6	26.3	26.3	31.6	31.6	31.6	26.3	26.3	26.3	26.3	26.3	26.3	26.3	26.3	31.6	26.3	31.6	26.3	31.6	31.6	31.6	26.3	15.8	31.6	26.3	26.3	26.3	15.8	26.3	PIGNQHIYQPVGKPD-p;u|YMEDSTYYKASKGKL-p;u|DRSNDKVYENVTGLV-p;u|RYMEDSTYYKASKGK-p;u|DMYDKEYYSVHNKTG-p;u	KKVSSTHYYLLPERP-p;u|DMYDKEYYSVHNKTG-p;u|DRSNDKVYENVTGLV-p;u|RYMEDSTYYKASKGK-p;u|YMEDSTYYKASKGKL-p;u|PIGNQHIYQPVGKPD-p;u	DMYDKEYYSVHNKTG-p;u|DRSNDKVYENVTGLV-p;u|RYMEDSTYYKASKGK-p;u|YMEDSTYYKASKGKL-p;u|PIGNQHIYQPVGKPD-p;u	DRSNDKVYENVTGLV-p;u|PIGNQHIYQPVGKPD-p;u|YMEDSTYYKASKGKL-p;u|RYMEDSTYYKASKGK-p;u|DMYDKEYYSVHNKTG-p;u	KKVSSTHYYLLPERP-p;u|DMYDKEYYSVHNKTG-p;u|DRSNDKVYENVTGLV-p;u|RYMEDSTYYKASKGK-p;u|YMEDSTYYKASKGKL-p;u	DMYDKEYYSVHNKTG-p;u|KKVSSTHYYLLPERP-p;u|DRSNDKVYENVTGLV-p;u|PIGNQHIYQPVGKPD-p;u|RYMEDSTYYKASKGK-p;u|YMEDSTYYKASKGKL-p;u	KKVSSTHYYLLPERP-p;u|DRSNDKVYENVTGLV-p;u|DMYDKEYYSVHNKTG-p;u|PIGNQHIYQPVGKPD-p;u|RYMEDSTYYKASKGK-p;u|YMEDSTYYKASKGKL-p;u	DMYDKEYYSVHNKTG-p;u|DRSNDKVYENVTGLV-p;u|RYMEDSTYYKASKGK-p;u|PIGNQHIYQPVGKPD-p;u|YMEDSTYYKASKGKL-p;u	DMYDKEYYSVHNKTG-p;u|DRSNDKVYENVTGLV-p;u|PIGNQHIYQPVGKPD-p;u|RYMEDSTYYKASKGK-p;u|YMEDSTYYKASKGKL-p;u	KKVSSTHYYLLPERP-p;u|PIGNQHIYQPVGKPD-p;u|DRSNDKVYENVTGLV-p;u|YMEDSTYYKASKGKL-p;u|RYMEDSTYYKASKGK-p;u|DMYDKEYYSVHNKTG-p;u	KKVSSTHYYLLPERP-p;u|DMYDKEYYSVHNKTG-p;u|PIGNQHIYQPVGKPD-p;u|DRSNDKVYENVTGLV-p;u|RYMEDSTYYKASKGK-p;u|YMEDSTYYKASKGKL-p;u	DMYDKEYYSVHNKTG-p;u|KKVSSTHYYLLPERP-p;u|YMEDSTYYKASKGKL-p;u|RYMEDSTYYKASKGK-p;u|PIGNQHIYQPVGKPD-p;u|DRSNDKVYENVTGLV-p;u
KINASE-PSP_Ret/RET	n=31|PIK3R1_Y203|RET_Y826|RET_Y981|RET_Y1015|PDPK1_Y9|ATF4_T114|DOK1_Y398|PTK2_Y925|RET_Y809|PTK2_Y861|ATF4_T119|RET_Y1029|RET_Y1090|ATF4_T107|RET_Y687|PLCG1_Y783|PTK2_Y577|AFAP1L2_Y54|ATF4_T115|MAPK9_Y185|AKT1_Y315|RET_Y806|RET_Y1096|RET_Y900|MAPK1_Y187|MAPK8_Y185|RET_Y905|PTK2_Y576|MAPK3_Y204|RET_Y1062|MAPK14_Y182	30	30	36.7	40	23.3	23.3	36.7	40	23.3	26.7	36.7	30	26.7	23.3	40	30	23.3	26.7	36.7	23.3	33.3	40	30	26.7	40	36.7	40	30	30	20	40	30	40	30	20	23.3	TDDEMTGYVATRWYR-p;u|TNFMMTPYVVTRYYR-p;u|TSFMMTPYVVTRYYR-p;u|PIGNQHIYQPVGKPD-p;u|YMEDSTYYKASKGKL-p;u|DRSNDKVYENVTGLV-p;u|TWIENKLYGMSDPNW-p;u|RYMEDSTYYKASKGK-p;u|SSSSDEEYIYMNKVT-p;u	TNFMMTPYVVTRYYR-p;u|ARVKEEGYELPYNPA-p;u|FGLSRDVYEEDSYVK-p;u|DVYEEDSYVKRSQGR-p;u|TSFMMTPYVVTRYYR-p;u|TDDEMTGYVATRWYR-p;u|DRSNDKVYENVTGLV-p;u|RYMEDSTYYKASKGK-p;u|SSSSDEEYIYMNKVT-p;u|YMEDSTYYKASKGKL-p;u|PIGNQHIYQPVGKPD-p;u	ARVKEEGYELPYNPA-p;u|TDDEMTGYVATRWYR-p;u|TWIENKLYGMSDPNW-p;u|FGLSRDVYEEDSYVK-p;u|DVYEEDSYVKRSQGR-p;u|TNFMMTPYVVTRYYR-p;u|DRSNDKVYENVTGLV-p;u|RYMEDSTYYKASKGK-p;u|YMEDSTYYKASKGKL-p;u|PIGNQHIYQPVGKPD-p;u|TSFMMTPYVVTRYYR-p;u|SSSSDEEYIYMNKVT-p;u	TDDEMTGYVATRWYR-p;u|TSFMMTPYVVTRYYR-p;u|DRSNDKVYENVTGLV-p;u|TNFMMTPYVVTRYYR-p;u|PIGNQHIYQPVGKPD-p;u|YMEDSTYYKASKGKL-p;u|RYMEDSTYYKASKGK-p;u	TDDEMTGYVATRWYR-p;u|TNFMMTPYVVTRYYR-p;u|TSFMMTPYVVTRYYR-p;u|DRSNDKVYENVTGLV-p;u|RYMEDSTYYKASKGK-p;u|YMEDSTYYKASKGKL-p;u|SSSSDEEYIYMNKVT-p;u	ARVKEEGYELPYNPA-p;u|TNFMMTPYVVTRYYR-p;u|TDDEMTGYVATRWYR-p;u|FGLSRDVYEEDSYVK-p;u|DVYEEDSYVKRSQGR-p;u|TSFMMTPYVVTRYYR-p;u|DRSNDKVYENVTGLV-p;u|SSSSDEEYIYMNKVT-p;u|PIGNQHIYQPVGKPD-p;u|RYMEDSTYYKASKGK-p;u|YMEDSTYYKASKGKL-p;u	FGLSRDVYEEDSYVK-p;u|DVYEEDSYVKRSQGR-p;u|TDDEMTGYVATRWYR-p;u|TSFMMTPYVVTRYYR-p;u|TWIENKLYGMSDPNW-p;u|TNFMMTPYVVTRYYR-p;u|ARVKEEGYELPYNPA-p;u|DRSNDKVYENVTGLV-p;u|SSSSDEEYIYMNKVT-p;u|PIGNQHIYQPVGKPD-p;u|RYMEDSTYYKASKGK-p;u|YMEDSTYYKASKGKL-p;u	TDDEMTGYVATRWYR-p;u|TNFMMTPYVVTRYYR-p;u|TSFMMTPYVVTRYYR-p;u|DRSNDKVYENVTGLV-p;u|RYMEDSTYYKASKGK-p;u|PIGNQHIYQPVGKPD-p;u|YMEDSTYYKASKGKL-p;u	TNFMMTPYVVTRYYR-p;u|TDDEMTGYVATRWYR-p;u|TSFMMTPYVVTRYYR-p;u|DRSNDKVYENVTGLV-p;u|PIGNQHIYQPVGKPD-p;u|RYMEDSTYYKASKGK-p;u|YMEDSTYYKASKGKL-p;u|SSSSDEEYIYMNKVT-p;u	TDDEMTGYVATRWYR-p;u|ARVKEEGYELPYNPA-p;u|TNFMMTPYVVTRYYR-p;u|SSSSDEEYIYMNKVT-p;u|FGLSRDVYEEDSYVK-p;u|DVYEEDSYVKRSQGR-p;u|PIGNQHIYQPVGKPD-p;u|TSFMMTPYVVTRYYR-p;u|DRSNDKVYENVTGLV-p;u|YMEDSTYYKASKGKL-p;u|RYMEDSTYYKASKGK-p;u	TSFMMTPYVVTRYYR-p;u|TNFMMTPYVVTRYYR-p;u|TDDEMTGYVATRWYR-p;u|TWIENKLYGMSDPNW-p;u|PIGNQHIYQPVGKPD-p;u|SSSSDEEYIYMNKVT-p;u|DRSNDKVYENVTGLV-p;u|RYMEDSTYYKASKGK-p;u|YMEDSTYYKASKGKL-p;u	TDDEMTGYVATRWYR-p;u|YMEDSTYYKASKGKL-p;u|RYMEDSTYYKASKGK-p;u|PIGNQHIYQPVGKPD-p;u|SSSSDEEYIYMNKVT-p;u|TSFMMTPYVVTRYYR-p;u|DRSNDKVYENVTGLV-p;u|TNFMMTPYVVTRYYR-p;u
KINASE-PSP_PKCZ/PRKCZ	n=67|PTEN_S380|NCOA3_T1059|OCLN_T404|MARK2_T596|NCOA3_S1033|MAPT_S352|RND3_S210|PHGDH_S55|MAPT_S258|GSK3B_S147|GSK3B_S9|STK11_S399|AQP9_S222|MYH10_S1937|RPS6KB2_S473|NCOA3_S1042|AQP9_S11|OCLN_T438|SP1_T668|BAX_S184|SMARCD3_S247|STK11_S428|MARK3_T564|NR1H4_T442|PPP1R14A_T38|OCLN_T424|IRS1_S323|PHGDH_T57|PIAS4_S18|CTNNB1_S45|SP1_T681|PHGDH_T78|NCOA3_T1064|ADD2_S713|ADD1_S726|NCOA3_T1114|CASP9_S144|…	66	12.1	12.1	13.6	12.1	10.6	12.1	12.1	10.6	12.1	13.6	12.1	12.1	12.1	12.1	12.1	12.1	12.1	13.6	10.6	13.6	12.1	12.1	12.1	12.1	12.1	12.1	13.6	12.1	10.6	12.1	12.1	12.1	12.1	10.6	10.6	SGRPRTTSFAESCKP-p;u|SHSRQASTDAGTAGA-p;u|KSHSRQASTDAGTAG-p;u|DHYETDYTTGGESCD-p;u|KKKFRTPSFLKKSKK-p;u|MVGGKPGSFRVRASS-p;u|HYETDYTTGGESCDE-p;u|RGGPISFSSSRSGRR-p;u	QVVGRAGTGVDNVDL-p;u|MVGGKPGSFRVRASS-p;u|HYETDYTTGGESCDE-p;u|SGRPRTTSFAESCKP-p;u|KSHSRQASTDAGTAG-p;u|DHYETDYTTGGESCD-p;u|SHSRQASTDAGTAGA-p;u|KKKFRTPSFLKKSKK-p;u	KSHSRQASTDAGTAG-p;u|MVGGKPGSFRVRASS-p;u|HYETDYTTGGESCDE-p;u|SGRPRTTSFAESCKP-p;u|DHYETDYTTGGESCD-p;u|SHSRQASTDAGTAGA-p;u|QVVGRAGTGVDNVDL-p;u|KKKFRTPSFLKKSKK-p;u|RGGPISFSSSRSGRR-p;u	KKKFRTPSFLKKSKK-p;u|SGRPRTTSFAESCKP-p;u|RGGPISFSSSRSGRR-p;u|DHYETDYTTGGESCD-p;u|HYETDYTTGGESCDE-p;u|KSHSRQASTDAGTAG-p;u|MVGGKPGSFRVRASS-p;u|SHSRQASTDAGTAGA-p;u	SHSRQASTDAGTAGA-p;u|KSHSRQASTDAGTAG-p;u|HYETDYTTGGESCDE-p;u|DHYETDYTTGGESCD-p;u|SGRPRTTSFAESCKP-p;u|MVGGKPGSFRVRASS-p;u|KKKFRTPSFLKKSKK-p;u	HYETDYTTGGESCDE-p;u|DHYETDYTTGGESCD-p;u|SGRPRTTSFAESCKP-p;u|KSHSRQASTDAGTAG-p;u|SHSRQASTDAGTAGA-p;u|KKKFRTPSFLKKSKK-p;u|QVVGRAGTGVDNVDL-p;u|MVGGKPGSFRVRASS-p;u	QVVGRAGTGVDNVDL-p;u|SGRPRTTSFAESCKP-p;u|KSHSRQASTDAGTAG-p;u|HYETDYTTGGESCDE-p;u|DHYETDYTTGGESCD-p;u|MVGGKPGSFRVRASS-p;u|SHSRQASTDAGTAGA-p;u|KKKFRTPSFLKKSKK-p;u	KSHSRQASTDAGTAG-p;u|SGRPRTTSFAESCKP-p;u|MVGGKPGSFRVRASS-p;u|HYETDYTTGGESCDE-p;u|KKKFRTPSFLKKSKK-p;u|DHYETDYTTGGESCD-p;u|RGGPISFSSSRSGRR-p;u	MVGGKPGSFRVRASS-p;u|KSHSRQASTDAGTAG-p;u|SHSRQASTDAGTAGA-p;u|DHYETDYTTGGESCD-p;u|HYETDYTTGGESCDE-p;u|SGRPRTTSFAESCKP-p;u|KKKFRTPSFLKKSKK-p;u|RGGPISFSSSRSGRR-p;u	SGRPRTTSFAESCKP-p;u|SHSRQASTDAGTAGA-p;u|HYETDYTTGGESCDE-p;u|KSHSRQASTDAGTAG-p;u|DHYETDYTTGGESCD-p;u|QVVGRAGTGVDNVDL-p;u|MVGGKPGSFRVRASS-p;u|KKKFRTPSFLKKSKK-p;u|RGGPISFSSSRSGRR-p;u	DHYETDYTTGGESCD-p;u|HYETDYTTGGESCDE-p;u|SGRPRTTSFAESCKP-p;u|KSHSRQASTDAGTAG-p;u|KKKFRTPSFLKKSKK-p;u|SHSRQASTDAGTAGA-p;u|MVGGKPGSFRVRASS-p;u|RGGPISFSSSRSGRR-p;u	KKKFRTPSFLKKSKK-p;u|SGRPRTTSFAESCKP-p;u|MVGGKPGSFRVRASS-p;u|SHSRQASTDAGTAGA-p;u|HYETDYTTGGESCDE-p;u|KSHSRQASTDAGTAG-p;u|DHYETDYTTGGESCD-p;u|RGGPISFSSSRSGRR-p;u
KINASE-PSP_DYRK2	n=22|EIF4EBP1_S65|SIAH2_S68|H3F3A_T45|CARHSP1_S41|DCX_S306|SIAH2_T26|SIAH2_T119|KATNA1_S42|CARHSP1_S30|CARHSP1_S32|TP53_S46|KATNA1_S109|KATNA1_T133|DPYSL3_S522|DPYSL2_S522|MAPT_T212|SIAH2_S16|EIF4EBP1_S101|PSMC4_T25|TBK1_S527|CRMP1_S522|SIAH2_S28	22	45.5	45.5	45.5	45.5	45.5	45.5	45.5	45.5	45.5	45.5	40.9	45.5	45.5	45.5	45.5	45.5	45.5	45.5	45.5	45.5	45.5	45.5	45.5	45.5	45.5	45.5	45.5	45.5	45.5	45.5	45.5	45.5	45.5	45.5	45.5	FLMECRNSPVTKTPP-p;u|TPRSRERSPSPLRGN-p;u|RSRERSPSPLRGNVV-p;u|LRGNVVPSPLPTRRT-p;u|PASSAKTSPAKQQAP-p;u|SQSHLRNSPEDKRAG-p;u|LSVSRPQTGLSFLGP-p;u|PAGSARGSPTRPNPP-p;u|TPGSRSRTPSLPTPP-p;u|VPVERRPSPGPRKRQ-p;u	TPRSRERSPSPLRGN-p;u|LRGNVVPSPLPTRRT-p;u|RSRERSPSPLRGNVV-p;u|FLMECRNSPVTKTPP-p;u|SQSHLRNSPEDKRAG-p;u|PASSAKTSPAKQQAP-p;u|LSVSRPQTGLSFLGP-p;u|VPVERRPSPGPRKRQ-p;u|TPGSRSRTPSLPTPP-p;u|PAGSARGSPTRPNPP-p;u	VPVERRPSPGPRKRQ-p;u|SQSHLRNSPEDKRAG-p;u|LRGNVVPSPLPTRRT-p;u|LSVSRPQTGLSFLGP-p;u|TPGSRSRTPSLPTPP-p;u|FLMECRNSPVTKTPP-p;u|TPRSRERSPSPLRGN-p;u|RSRERSPSPLRGNVV-p;u|PASSAKTSPAKQQAP-p;u|PAGSARGSPTRPNPP-p;u	FLMECRNSPVTKTPP-p;u|TPGSRSRTPSLPTPP-p;u|VPVERRPSPGPRKRQ-p;u|LRGNVVPSPLPTRRT-p;u|RSRERSPSPLRGNVV-p;u|PASSAKTSPAKQQAP-p;u|SQSHLRNSPEDKRAG-p;u|TPRSRERSPSPLRGN-p;u|LSVSRPQTGLSFLGP-p;u|PAGSARGSPTRPNPP-p;u	VPVERRPSPGPRKRQ-p;u|LRGNVVPSPLPTRRT-p;u|RSRERSPSPLRGNVV-p;u|TPRSRERSPSPLRGN-p;u|SQSHLRNSPEDKRAG-p;u|LSVSRPQTGLSFLGP-p;u|PASSAKTSPAKQQAP-p;u|TPGSRSRTPSLPTPP-p;u|FLMECRNSPVTKTPP-p;u|PAGSARGSPTRPNPP-p;u	LSVSRPQTGLSFLGP-p;u|VPVERRPSPGPRKRQ-p;u|LRGNVVPSPLPTRRT-p;u|TPRSRERSPSPLRGN-p;u|SQSHLRNSPEDKRAG-p;u|RSRERSPSPLRGNVV-p;u|TPGSRSRTPSLPTPP-p;u|FLMECRNSPVTKTPP-p;u|PASSAKTSPAKQQAP-p;u|PAGSARGSPTRPNPP-p;u	TPGSRSRTPSLPTPP-p;u|LRGNVVPSPLPTRRT-p;u|TPRSRERSPSPLRGN-p;u|RSRERSPSPLRGNVV-p;u|PASSAKTSPAKQQAP-p;u|SQSHLRNSPEDKRAG-p;u|LSVSRPQTGLSFLGP-p;u|VPVERRPSPGPRKRQ-p;u|FLMECRNSPVTKTPP-p;u|PAGSARGSPTRPNPP-p;u	FLMECRNSPVTKTPP-p;u|LSVSRPQTGLSFLGP-p;u|SQSHLRNSPEDKRAG-p;u|VPVERRPSPGPRKRQ-p;u|TPGSRSRTPSLPTPP-p;u|TPRSRERSPSPLRGN-p;u|RSRERSPSPLRGNVV-p;u|LRGNVVPSPLPTRRT-p;u|PASSAKTSPAKQQAP-p;u|PAGSARGSPTRPNPP-p;u	VPVERRPSPGPRKRQ-p;u|PASSAKTSPAKQQAP-p;u|LRGNVVPSPLPTRRT-p;u|RSRERSPSPLRGNVV-p;u|SQSHLRNSPEDKRAG-p;u|TPRSRERSPSPLRGN-p;u|LSVSRPQTGLSFLGP-p;u|FLMECRNSPVTKTPP-p;u|TPGSRSRTPSLPTPP-p;u|PAGSARGSPTRPNPP-p;u	PASSAKTSPAKQQAP-p;u|FLMECRNSPVTKTPP-p;u|TPRSRERSPSPLRGN-p;u|LRGNVVPSPLPTRRT-p;u|RSRERSPSPLRGNVV-p;u|LSVSRPQTGLSFLGP-p;u|SQSHLRNSPEDKRAG-p;u|TPGSRSRTPSLPTPP-p;u|VPVERRPSPGPRKRQ-p;u|PAGSARGSPTRPNPP-p;u	LSVSRPQTGLSFLGP-p;u|VPVERRPSPGPRKRQ-p;u|SQSHLRNSPEDKRAG-p;u|FLMECRNSPVTKTPP-p;u|RSRERSPSPLRGNVV-p;u|LRGNVVPSPLPTRRT-p;u|TPRSRERSPSPLRGN-p;u|PASSAKTSPAKQQAP-p;u|PAGSARGSPTRPNPP-p;u	TPRSRERSPSPLRGN-p;u|LRGNVVPSPLPTRRT-p;u|LSVSRPQTGLSFLGP-p;u|RSRERSPSPLRGNVV-p;u|PASSAKTSPAKQQAP-p;u|VPVERRPSPGPRKRQ-p;u|SQSHLRNSPEDKRAG-p;u|TPGSRSRTPSLPTPP-p;u|FLMECRNSPVTKTPP-p;u|PAGSARGSPTRPNPP-p;u
KINASE-PSP_CK2A1/CSNK2A1	n=477|DDX58_S854|PAK1_S223|DDIT3_S31|MME_S6|PTEN_S380|RPS6KA5_S760|PPP1R2_S87|CAV2_S36|SPTBN1_S2110|FAF1_S291|MYH10_S1956|CDC27_S154|OCLN_T404|TARDBP_S379|L1CAM_S1181|XRCC1_T488|CBX1_T51|MAPRE2_S236|ESR1_S282|ECE1_S20|XRCC1_S421|VTN_T76|RNPS1_S53|CTNNA1_S641|NCOR2_S2511|YY1_S118|WAS_S483|NOL3_T149|DNAJB2_S247|STAT1_S727|CERS5_S356|ECE1_S18|EIF5_T207|SLITRK1_S695|HMGN1_S99|PACS1_S278|PLD1_S611|MRE…	477	21.2	21.8	22	21.6	22	21.8	21.6	19.9	21.8	21.8	20.3	20.8	21.6	21.6	21	21.6	21.8	22.2	22	22.6	21.6	21	20.8	21.6	21.8	21.6	21.8	21.2	21.4	21.6	21	21.6	21.2	21.6	22	LYKKLRLSTDTVEHS-p;u|LELSDDDTESKTSDV-p;u|MSPGVAGSPRIPPSQ-p;u|QLHLEGASLELSDDD-p;u|GRYKSTTSVSEEDVS-p;u|_MPKRKVSSAEGAAK-p;u|KGVDFESSEDDDDDP-p;u|SKGVDFESSEDDDDD-p;u|NRRKRKPSTSDDSDS-p;u|PEPSTKVSEEAESQQ-p;u|EGASLELSDDDTESK-p;u|LSPRHRMSPGVAGSP-p;u|KPQKSVVSDLEADDV-p;u|KSSSRQLSESFKSKE-p;u|VEDDIDLSDVELDDL-p;u|DYTTGGESCDELEED-p;u|NGATEQRTSSKESSP-p;u|EVIEVDESDVEEDIF-p;u|DVATSPISPTENNTT-p;u|SPVLAEDSEGEG___-p;u…	DDSYSHHSGLEYADP-p;u|DPEKFADSDQDRDPH-p;u|RKGAGDGSDEEVDGK-p;u|NRRKRKPSTSDDSDS-p;u|GQPTSMLSPRHRMSP-p;u|_MPKRKVSSAEGAAK-p;u|AALIQDQSEEEEEEE-p;u|KKLSVPTSDEEDEVP-p;u|DTRKKDASDDLDDLN-p;u|DDIDLFGSDNEEEDK-p;u|TDNLLPMSPEEFDEV-p;u|CQTAEADSESDHEVP-p;u|TAEADSESDHEVPEP-p;u|HYETDYTTGGESCDE-p;u|LVSFHDDSDEDLLHI-p;u|PKSPGPHSEEEDEAE-p;u|MPKRKVSSAEGAAKE-p;u|GDVEGSQSQDEGEGS-p;u|AWQEECPSDSEEDEG-p;u|QEECPSDSEEDEGRG-p;u…	NRRKRKPSTSDDSDS-p;u|QEEEILGSDDDEQED-p;u|MSPGVAGSPRIPPSQ-p;u|AWQEECPSDSEEDEG-p;u|QEECPSDSEEDEGRG-p;u|MPKRKVSSAEGAAKE-p;u|RRGLLYDSDEEDEER-p;u|LSPRHRMSPGVAGSP-p;u|______MSGDEMIFD-p;u|GNDPLTSSPGRSSRR-p;u|KAGEQQLSEPEDMEM-p;u|SPLKAALSEEELEKK-p;u|CQTAEADSESDHEVP-p;u|TAEADSESDHEVPEP-p;u|SQRGRSGSGNFGGGR-p;u|RTDALTSSPGRDLPP-p;u|RRTDALTSSPGRDLP-p;u|LKEAEEESSGGEEED-p;u|KEAEEESSGGEEEDE-p;u|IACEEEFSDSEEEGE-p;u…	QLHLEGASLELSDDD-p;u|LYKKLRLSTDTVEHS-p;u|EGASLELSDDDTESK-p;u|TDNLLPMSPEEFDEV-p;u|SQRGRSGSGNFGGGR-p;u|KSSSRQLSESFKSKE-p;u|_MPKRKVSSAEGAAK-p;u|KPQKSVVSDLEADDV-p;u|NRRKRKPSTSDDSDS-p;u|QEEEILGSDDDEQED-p;u|SPLKAALSEEELEKK-p;u|MSPGVAGSPRIPPSQ-p;u|DDLNNYDSDDQEKQS-p;u|PEPSTKVSEEAESQQ-p;u|KGVDFESSEDDDDDP-p;u|LSPRHRMSPGVAGSP-p;u|DYTTGGESCDELEED-p;u|SGSPSDNSGAEEMEV-p;u|HYETDYTTGGESCDE-p;u|SPVLAEDSEGEG___-p;u…	LYKKLRLSTDTVEHS-p;u|__MGKSESQMDITDI-p;u|LVSFHDDSDEDLLHI-p;u|_MPKRKVSSAEGAAK-p;u|NRRKRKPSTSDDSDS-p;u|SPLKAALSEEELEKK-p;u|KSSSRQLSESFKSKE-p;u|AWQEECPSDSEEDEG-p;u|QEECPSDSEEDEGRG-p;u|MPKRKVSSAEGAAKE-p;u|PEPSTKVSEEAESQQ-p;u|KGVDFESSEDDDDDP-p;u|DYTTGGESCDELEED-p;u|HYETDYTTGGESCDE-p;u|YHLPDAESDEDEDFK-p;u|NGATEQRTSSKESSP-p;u|TPEELDDSDFETEDF-p;u|DVATSPISPTENNTT-p;u|GKKTKFASDDEHDEH-p;u|VIKDEALSDGDDLRD-p;u…	_MPKRKVSSAEGAAK-p;u|KGVDFESSEDDDDDP-p;u|LVSFHDDSDEDLLHI-p;u|PEPSTKVSEEAESQQ-p;u|SKGVDFESSEDDDDD-p;u|EVIEVDESDVEEDIF-p;u|VEDDIDLSDVELDDL-p;u|SPLKAALSEEELEKK-p;u|TKAQRENSPAAFPDR-p;u|HYETDYTTGGESCDE-p;u|DVATSPISPTENNTT-p;u|DTRKKDASDDLDDLN-p;u|RKGAGDGSDEEVDGK-p;u|DYTTGGESCDELEED-p;u|MPKRKVSSAEGAAKE-p;u|LYKKLRLSTDTVEHS-p;u|LHGDDQDSEDEVLTI-p;u|KKLSVPTSDEEDEVP-p;u|YHLPDAESDEDEDFK-p;u|QASMVINSDTDDEEE-p;u…	ELRTAKDSDDDDDVA-p;u|LYKKLRLSTDTVEHS-p;u|SGSPSDNSGAEEMEV-p;u|NRRKRKPSTSDDSDS-p;u|SQRGRSGSGNFGGGR-p;u|KSSSRQLSESFKSKE-p;u|YHLPDAESDEDEDFK-p;u|_MPKRKVSSAEGAAK-p;u|MPKRKVSSAEGAAKE-p;u|KGVDFESSEDDDDDP-p;u|IACEEEFSDSEEEGE-p;u|CEEEFSDSEEEGEGG-p;u|LSPRHRMSPGVAGSP-p;u|LVSFHDDSDEDLLHI-p;u|DVATSPISPTENNTT-p;u|TIAESEDSQESVDSV-p;u|SKGVDFESSEDDDDD-p;u|PKSPGPHSEEEDEAE-p;u|EVVGGDDSDGLRAED-p;u|______MSDNDDIEV-p;u…	_MPKRKVSSAEGAAK-p;u|KGVDFESSEDDDDDP-p;u|SKGVDFESSEDDDDD-p;u|__MGKSESQMDITDI-p;u|SPLKAALSEEELEKK-p;u|LYKKLRLSTDTVEHS-p;u|KSSSRQLSESFKSKE-p;u|MSPGVAGSPRIPPSQ-p;u|MPKRKVSSAEGAAKE-p;u|LSPRHRMSPGVAGSP-p;u|______MSGDEMIFD-p;u|RKGAGDGSDEEVDGK-p;u|GDVEGSQSQDEGEGS-p;u|GETKTEESPASDEAG-p;u|LKKLQEESDLELAKE-p;u|DVATSPISPTENNTT-p;u|YHLPDAESDEDEDFK-p;u|LVSFHDDSDEDLLHI-p;u|KHEEEEWTDDDLVES-p;u|KTEESPASDEAGEKE-p;u…	DDLNNYDSDDQEKQS-p;u|LYKKLRLSTDTVEHS-p;u|VEDDIDLSDVELDDL-p;u|VIKDEALSDGDDLRD-p;u|NRRKRKPSTSDDSDS-p;u|SGSPSDNSGAEEMEV-p;u|KGVDFESSEDDDDDP-p;u|SPLKAALSEEELEKK-p;u|EDAVHEDSGDEDGED-p;u|______MSGDEMIFD-p;u|TIAESEDSQESVDSV-p;u|_MPKRKVSSAEGAAK-p;u|PKSPGPHSEEEDEAE-p;u|SKGVDFESSEDDDDD-p;u|NSEASNASETESDHR-p;u|QISTIAESEDSQESV-p;u|NGATEQRTSSKESSP-p;u|QEEEILGSDDDEQED-p;u|DYTTGGESCDELEED-p;u|HYETDYTTGGESCDE-p;u…	KGVDFESSEDDDDDP-p;u|LKEAEEESSGGEEED-p;u|KEAEEESSGGEEEDE-p;u|SKGVDFESSEDDDDD-p;u|DVATSPISPTENNTT-p;u|YRIQEQESSGEEDSD-p;u|______MSGDEMIFD-p;u|_MPKRKVSSAEGAAK-p;u|MPKRKVSSAEGAAKE-p;u|SPVLAEDSEGEG___-p;u|KSSSRQLSESFKSKE-p;u|RIQEQESSGEEDSDL-p;u|SQRGRSGSGNFGGGR-p;u|RKGAGDGSDEEVDGK-p;u|QASMVINSDTDDEEE-p;u|SMVINSDTDDEEEVS-p;u|______MSDNDDIEV-p;u|PEPSTKVSEEAESQQ-p;u|EVIEVDESDVEEDIF-p;u|CEEEFSDSEEEGEGG-p;u…	_MPKRKVSSAEGAAK-p;u|LYKKLRLSTDTVEHS-p;u|PEPSTKVSEEAESQQ-p;u|EVIEVDESDVEEDIF-p;u|DPEKFADSDQDRDPH-p;u|DTRKKDASDDLDDLN-p;u|KGVDFESSEDDDDDP-p;u|TKAQRENSPAAFPDR-p;u|DVATSPISPTENNTT-p;u|WKDWEDDSDEDMSNF-p;u|KSSSRQLSESFKSKE-p;u|AALIQDQSEEEEEEE-p;u|SPVLAEDSEGEG___-p;u|KKLSVPTSDEEDEVP-p;u|SKGVDFESSEDDDDD-p;u|YHLPDAESDEDEDFK-p;u|SQRGRSGSGNFGGGR-p;u|DYTTGGESCDELEED-p;u|KEREKEISDDEAEEE-p;u|TDNLLPMSPEEFDEV-p;u…	LVSFHDDSDEDLLHI-p;u|YHLPDAESDEDEDFK-p;u|_MPKRKVSSAEGAAK-p;u|LYKKLRLSTDTVEHS-p;u|SPLKAALSEEELEKK-p;u|GRYKSTTSVSEEDVS-p;u|RKGAGDGSDEEVDGK-p;u|EVIEVDESDVEEDIF-p;u|SQRGRSGSGNFGGGR-p;u|QLHLEGASLELSDDD-p;u|GEPGLSHSGSEQPEQ-p;u|EGASLELSDDDTESK-p;u|ESQAGSDTDVEEGKA-p;u|AALIQDQSEEEEEEE-p;u|GKKTKFASDDEHDEH-p;u|KPQKSVVSDLEADDV-p;u|TPEELDDSDFETEDF-p;u|SLPPRASSPPQILPQ-p;u|KSSSRQLSESFKSKE-p;u|LQESQAGSDTDVEEG-p;u…
KINASE-PSP_HIPK2	n=42|ZBTB4_T797|RUNX1_S249|KLF3_S78|HMGA1_T78|KLF3_S250|NOTCH1_T2511|CTBP1_S422|CTBP2_S428|HMGA1_T67|PML_S36|MECP2_S216|MECP2_S80|TP53_S46|PPM1D_S85|SIRT1_S682|RUNX1_T273|RUNX1_S276|PML_S8|KLF3_S224|KLF3_S111|HMGA1_T53|KLF3_S71|HIPK2_T880|CDKN1B_S10|HIPK2_S882|CBX4_T497|HIPK2_Y361|ZBTB4_T795|KLF3_S108|CREB1_S271|KLF3_S101|KLF3_S92|ZBTB4_T983|PML_S38|HMGA1_T42|HMGA1_S36|SIRT1_S27|SIAH2_S28|HIPK2_S…	40	50	42.5	47.5	50	45	42.5	45	47.5	47.5	47.5	47.5	45	50	45	47.5	50	47.5	47.5	45	47.5	45	47.5	45	45	42.5	45	47.5	50	47.5	45	47.5	45	50	45	45	SSSSPPGTPSPADAK-p;u|NVRVSNGSPSLERMD-p;u|ADREAASSPAGEPLR-p;u|IKKYSPPSPGVQPFG-p;u|SPPIKKYSPPSPGVQ-p;u|PSSHRRASPGLSMPS-p;u|AAPPAPPTPPPPTLP-p;u|KRPLPVESPDTQRKR-p;u|DTRQIQPSPPWSYDQ-p;u|SKAVCSTYLQSRYYR-p;u|GLSMPSSSPPIKKYS-p;u|SPPSAGNSPSSLKFP-p;u|PGVVMASSPALPTQP-p;u|LTVNKRSSPPSAGNS-p;u|MEPAPARSPRPQQDP-p;u|EGRQPSPSPSPTERA-p;u|PSEGRQPSPSPSPTE-p;u|PRKQPPVSPGTALVG-p;u|AVPEASASPKQRRSI-p;u|KEPSEVPTPKRPRGR-p;u	PSEGRQPSPSPSPTE-p;u|MEPAPARSPRPQQDP-p;u|EGRQPSPSPSPTERA-p;u|SKAVCSTYLQSRYYR-p;u|KRPLPVESPDTQRKR-p;u|ADREAASSPAGEPLR-p;u|PSSHRRASPGLSMPS-p;u|PGVVMASSPALPTQP-p;u|GLSMPSSSPPIKKYS-p;u|LTVNKRSSPPSAGNS-p;u|AVPEASASPKQRRSI-p;u|SPPIKKYSPPSPGVQ-p;u|IKKYSPPSPGVQPFG-p;u|SPPSAGNSPSSLKFP-p;u|PRKQPPVSPGTALVG-p;u|NVRVSNGSPSLERMD-p;u|KEPSEVPTPKRPRGR-p;u	GLSMPSSSPPIKKYS-p;u|PSSHRRASPGLSMPS-p;u|KRPLPVESPDTQRKR-p;u|IKKYSPPSPGVQPFG-p;u|ADREAASSPAGEPLR-p;u|SPPIKKYSPPSPGVQ-p;u|LTVNKRSSPPSAGNS-p;u|SPPSAGNSPSSLKFP-p;u|DTRQIQPSPPWSYDQ-p;u|SKAVCSTYLQSRYYR-p;u|PGVVMASSPALPTQP-p;u|EGRQPSPSPSPTERA-p;u|AVPEASASPKQRRSI-p;u|NVRVSNGSPSLERMD-p;u|MEPAPARSPRPQQDP-p;u|PSEGRQPSPSPSPTE-p;u|PRKQPPVSPGTALVG-p;u|KEPSEVPTPKRPRGR-p;u|SSSSPPGTPSPADAK-p;u	MEPAPARSPRPQQDP-p;u|GLSMPSSSPPIKKYS-p;u|PSSHRRASPGLSMPS-p;u|KRPLPVESPDTQRKR-p;u|SPPSAGNSPSSLKFP-p;u|IKKYSPPSPGVQPFG-p;u|PSEGRQPSPSPSPTE-p;u|SPPIKKYSPPSPGVQ-p;u|LTVNKRSSPPSAGNS-p;u|EGRQPSPSPSPTERA-p;u|SSSSPPGTPSPADAK-p;u|SKAVCSTYLQSRYYR-p;u|PGVVMASSPALPTQP-p;u|ADREAASSPAGEPLR-p;u|DTRQIQPSPPWSYDQ-p;u|AAPPAPPTPPPPTLP-p;u|NVRVSNGSPSLERMD-p;u|AVPEASASPKQRRSI-p;u|PRKQPPVSPGTALVG-p;u|KEPSEVPTPKRPRGR-p;u	SSSSPPGTPSPADAK-p;u|LTVNKRSSPPSAGNS-p;u|KRPLPVESPDTQRKR-p;u|PSSHRRASPGLSMPS-p;u|SPPSAGNSPSSLKFP-p;u|MEPAPARSPRPQQDP-p;u|IKKYSPPSPGVQPFG-p;u|GLSMPSSSPPIKKYS-p;u|SPPIKKYSPPSPGVQ-p;u|EGRQPSPSPSPTERA-p;u|SKAVCSTYLQSRYYR-p;u|PSEGRQPSPSPSPTE-p;u|PGVVMASSPALPTQP-p;u|NVRVSNGSPSLERMD-p;u|ADREAASSPAGEPLR-p;u|AVPEASASPKQRRSI-p;u|PRKQPPVSPGTALVG-p;u|KEPSEVPTPKRPRGR-p;u	NVRVSNGSPSLERMD-p;u|PSSHRRASPGLSMPS-p;u|LTVNKRSSPPSAGNS-p;u|EGRQPSPSPSPTERA-p;u|KRPLPVESPDTQRKR-p;u|GLSMPSSSPPIKKYS-p;u|IKKYSPPSPGVQPFG-p;u|SPPSAGNSPSSLKFP-p;u|PSEGRQPSPSPSPTE-p;u|MEPAPARSPRPQQDP-p;u|SPPIKKYSPPSPGVQ-p;u|PGVVMASSPALPTQP-p;u|SKAVCSTYLQSRYYR-p;u|PRKQPPVSPGTALVG-p;u|ADREAASSPAGEPLR-p;u|AVPEASASPKQRRSI-p;u|KEPSEVPTPKRPRGR-p;u	SPPSAGNSPSSLKFP-p;u|IKKYSPPSPGVQPFG-p;u|SSSSPPGTPSPADAK-p;u|SKAVCSTYLQSRYYR-p;u|KRPLPVESPDTQRKR-p;u|SPPIKKYSPPSPGVQ-p;u|PSSHRRASPGLSMPS-p;u|LTVNKRSSPPSAGNS-p;u|NVRVSNGSPSLERMD-p;u|EGRQPSPSPSPTERA-p;u|ADREAASSPAGEPLR-p;u|GLSMPSSSPPIKKYS-p;u|AVPEASASPKQRRSI-p;u|PGVVMASSPALPTQP-p;u|MEPAPARSPRPQQDP-p;u|PSEGRQPSPSPSPTE-p;u|PRKQPPVSPGTALVG-p;u|KEPSEVPTPKRPRGR-p;u	SSSSPPGTPSPADAK-p;u|PSSHRRASPGLSMPS-p;u|GLSMPSSSPPIKKYS-p;u|IKKYSPPSPGVQPFG-p;u|KRPLPVESPDTQRKR-p;u|SPPIKKYSPPSPGVQ-p;u|LTVNKRSSPPSAGNS-p;u|MEPAPARSPRPQQDP-p;u|EGRQPSPSPSPTERA-p;u|PSEGRQPSPSPSPTE-p;u|PGVVMASSPALPTQP-p;u|DTRQIQPSPPWSYDQ-p;u|NVRVSNGSPSLERMD-p;u|AVPEASASPKQRRSI-p;u|AAPPAPPTPPPPTLP-p;u|ADREAASSPAGEPLR-p;u|SKAVCSTYLQSRYYR-p;u|PRKQPPVSPGTALVG-p;u|KEPSEVPTPKRPRGR-p;u	AAPPAPPTPPPPTLP-p;u|ADREAASSPAGEPLR-p;u|SKAVCSTYLQSRYYR-p;u|MEPAPARSPRPQQDP-p;u|PSSHRRASPGLSMPS-p;u|AVPEASASPKQRRSI-p;u|IKKYSPPSPGVQPFG-p;u|SPPIKKYSPPSPGVQ-p;u|LTVNKRSSPPSAGNS-p;u|KRPLPVESPDTQRKR-p;u|GLSMPSSSPPIKKYS-p;u|PGVVMASSPALPTQP-p;u|SPPSAGNSPSSLKFP-p;u|EGRQPSPSPSPTERA-p;u|PSEGRQPSPSPSPTE-p;u|PRKQPPVSPGTALVG-p;u|NVRVSNGSPSLERMD-p;u|SSSSPPGTPSPADAK-p;u|KEPSEVPTPKRPRGR-p;u	SSSSPPGTPSPADAK-p;u|IKKYSPPSPGVQPFG-p;u|PSSHRRASPGLSMPS-p;u|KRPLPVESPDTQRKR-p;u|GLSMPSSSPPIKKYS-p;u|MEPAPARSPRPQQDP-p;u|LTVNKRSSPPSAGNS-p;u|DTRQIQPSPPWSYDQ-p;u|SPPIKKYSPPSPGVQ-p;u|EGRQPSPSPSPTERA-p;u|PSEGRQPSPSPSPTE-p;u|SPPSAGNSPSSLKFP-p;u|NVRVSNGSPSLERMD-p;u|PGVVMASSPALPTQP-p;u|SKAVCSTYLQSRYYR-p;u|AVPEASASPKQRRSI-p;u|ADREAASSPAGEPLR-p;u|PRKQPPVSPGTALVG-p;u|KEPSEVPTPKRPRGR-p;u	PSSHRRASPGLSMPS-p;u|GLSMPSSSPPIKKYS-p;u|KRPLPVESPDTQRKR-p;u|IKKYSPPSPGVQPFG-p;u|MEPAPARSPRPQQDP-p;u|SSSSPPGTPSPADAK-p;u|LTVNKRSSPPSAGNS-p;u|SPPIKKYSPPSPGVQ-p;u|SPPSAGNSPSSLKFP-p;u|PSEGRQPSPSPSPTE-p;u|EGRQPSPSPSPTERA-p;u|SKAVCSTYLQSRYYR-p;u|PGVVMASSPALPTQP-p;u|AAPPAPPTPPPPTLP-p;u|ADREAASSPAGEPLR-p;u|NVRVSNGSPSLERMD-p;u|AVPEASASPKQRRSI-p;u|PRKQPPVSPGTALVG-p;u|KEPSEVPTPKRPRGR-p;u	KRPLPVESPDTQRKR-p;u|PSSHRRASPGLSMPS-p;u|LTVNKRSSPPSAGNS-p;u|GLSMPSSSPPIKKYS-p;u|MEPAPARSPRPQQDP-p;u|SPPIKKYSPPSPGVQ-p;u|IKKYSPPSPGVQPFG-p;u|EGRQPSPSPSPTERA-p;u|PSEGRQPSPSPSPTE-p;u|SKAVCSTYLQSRYYR-p;u|SPPSAGNSPSSLKFP-p;u|AAPPAPPTPPPPTLP-p;u|PGVVMASSPALPTQP-p;u|PRKQPPVSPGTALVG-p;u|AVPEASASPKQRRSI-p;u|ADREAASSPAGEPLR-p;u|KEPSEVPTPKRPRGR-p;u|NVRVSNGSPSLERMD-p;u
KINASE-PSP_GSK3A	n=35|MAPT_T231|LRP6_S1544|BCL3_S402|GSK3A_Y279|USF1_S186|IL17RA_T780|CTNNB1_S37|NDRG1_S342|MAPT_S396|BCL3_S406|NDRG1_S362|MAPT_S404|MAP3K11_S789|MITF_S298|MAPT_S262|CCNE1_T395|RICTOR_T1695|CTNNB1_S33|MYC_T58|CTPS1_S571|USF1_T153|NIFK_S230|CTNNB1_T41|NDRG1_S352|PKD2_S76|BCL2L1_S62|ANKRD28_S1007|NIFK_T234|UNG_S64|STMN3_S60|UNG_T60|MAPT_S235|AKT1_T312|MAP3K11_S793|DPYSL2_S518	34	41.2	47.1	44.1	38.2	44.1	47.1	44.1	35.3	44.1	47.1	44.1	44.1	38.2	44.1	44.1	38.2	44.1	44.1	44.1	44.1	44.1	44.1	44.1	44.1	47.1	44.1	47.1	41.2	41.2	44.1	44.1	44.1	41.2	44.1	44.1	RGEPNVSYICSRYYR-p;u|PRPSPLPSPQPAPRR-p;u|KTVTPASSAKTSPAK-p;u|VSAGPRPSPLPSPQP-p;u|TPEKTVDSQGPTPVC-p;u|EPGTPPSSPLSAEQL-p;u|PLPSGLLTPPQSGKK-p;u|TVDSQGPTPVCTPTF-p;u|RDTYSDRSGSSSPDS-p;u|AGQEEPGTPPSSPLS-p;u|KKFELLPTPPLSPSR-p;u|GAEIVYKSPVVSGDT-p;u|NVKSKIGSTENLKHQ-p;u|PVVSGDTSPRHLSNV-p;u	RGEPNVSYICSRYYR-p;u|TPEKTVDSQGPTPVC-p;u|RDTYSDRSGSSSPDS-p;u|PRPSPLPSPQPAPRR-p;u|PLPSGLLTPPQSGKK-p;u|VSAGPRPSPLPSPQP-p;u|TVDSQGPTPVCTPTF-p;u|EPGTPPSSPLSAEQL-p;u|KTVTPASSAKTSPAK-p;u|AGQEEPGTPPSSPLS-p;u|KKFELLPTPPLSPSR-p;u|GAEIVYKSPVVSGDT-p;u|KKVAVVRTPPKSPSS-p;u|PVVSGDTSPRHLSNV-p;u|VVRTPPKSPSSAKSR-p;u|NVKSKIGSTENLKHQ-p;u	PLPSGLLTPPQSGKK-p;u|RGEPNVSYICSRYYR-p;u|KKFELLPTPPLSPSR-p;u|TVDSQGPTPVCTPTF-p;u|TPEKTVDSQGPTPVC-p;u|PRPSPLPSPQPAPRR-p;u|VSAGPRPSPLPSPQP-p;u|EPGTPPSSPLSAEQL-p;u|AGQEEPGTPPSSPLS-p;u|RDTYSDRSGSSSPDS-p;u|KTVTPASSAKTSPAK-p;u|GAEIVYKSPVVSGDT-p;u|PVVSGDTSPRHLSNV-p;u|KKVAVVRTPPKSPSS-p;u|NVKSKIGSTENLKHQ-p;u	PVVSGDTSPRHLSNV-p;u|GAEIVYKSPVVSGDT-p;u|RGEPNVSYICSRYYR-p;u|EPGTPPSSPLSAEQL-p;u|KTVTPASSAKTSPAK-p;u|AGQEEPGTPPSSPLS-p;u|KKFELLPTPPLSPSR-p;u|NVKSKIGSTENLKHQ-p;u|TPEKTVDSQGPTPVC-p;u|RDTYSDRSGSSSPDS-p;u|TVDSQGPTPVCTPTF-p;u|PRPSPLPSPQPAPRR-p;u|VSAGPRPSPLPSPQP-p;u	RGEPNVSYICSRYYR-p;u|PRPSPLPSPQPAPRR-p;u|VSAGPRPSPLPSPQP-p;u|TVDSQGPTPVCTPTF-p;u|TPEKTVDSQGPTPVC-p;u|KTVTPASSAKTSPAK-p;u|RDTYSDRSGSSSPDS-p;u|KKFELLPTPPLSPSR-p;u|EPGTPPSSPLSAEQL-p;u|AGQEEPGTPPSSPLS-p;u|KKVAVVRTPPKSPSS-p;u|GAEIVYKSPVVSGDT-p;u|VVRTPPKSPSSAKSR-p;u|NVKSKIGSTENLKHQ-p;u|PVVSGDTSPRHLSNV-p;u	RGEPNVSYICSRYYR-p;u|TPEKTVDSQGPTPVC-p;u|PRPSPLPSPQPAPRR-p;u|VSAGPRPSPLPSPQP-p;u|TVDSQGPTPVCTPTF-p;u|EPGTPPSSPLSAEQL-p;u|RDTYSDRSGSSSPDS-p;u|PLPSGLLTPPQSGKK-p;u|KKFELLPTPPLSPSR-p;u|KTVTPASSAKTSPAK-p;u|GAEIVYKSPVVSGDT-p;u|NVKSKIGSTENLKHQ-p;u|AGQEEPGTPPSSPLS-p;u|KKVAVVRTPPKSPSS-p;u|PVVSGDTSPRHLSNV-p;u|VVRTPPKSPSSAKSR-p;u	VVRTPPKSPSSAKSR-p;u|KKVAVVRTPPKSPSS-p;u|PVVSGDTSPRHLSNV-p;u|NVKSKIGSTENLKHQ-p;u|KTVTPASSAKTSPAK-p;u|RGEPNVSYICSRYYR-p;u|PRPSPLPSPQPAPRR-p;u|TPEKTVDSQGPTPVC-p;u|VSAGPRPSPLPSPQP-p;u|EPGTPPSSPLSAEQL-p;u|RDTYSDRSGSSSPDS-p;u|TVDSQGPTPVCTPTF-p;u|PLPSGLLTPPQSGKK-p;u|AGQEEPGTPPSSPLS-p;u|KKFELLPTPPLSPSR-p;u	RGEPNVSYICSRYYR-p;u|PRPSPLPSPQPAPRR-p;u|VSAGPRPSPLPSPQP-p;u|TPEKTVDSQGPTPVC-p;u|TVDSQGPTPVCTPTF-p;u|KKFELLPTPPLSPSR-p;u|KTVTPASSAKTSPAK-p;u|GAEIVYKSPVVSGDT-p;u|EPGTPPSSPLSAEQL-p;u|PVVSGDTSPRHLSNV-p;u|AGQEEPGTPPSSPLS-p;u|NVKSKIGSTENLKHQ-p;u	PRPSPLPSPQPAPRR-p;u|KTVTPASSAKTSPAK-p;u|VSAGPRPSPLPSPQP-p;u|RDTYSDRSGSSSPDS-p;u|TPEKTVDSQGPTPVC-p;u|RGEPNVSYICSRYYR-p;u|KKFELLPTPPLSPSR-p;u|TVDSQGPTPVCTPTF-p;u|AGQEEPGTPPSSPLS-p;u|EPGTPPSSPLSAEQL-p;u|GAEIVYKSPVVSGDT-p;u|KKVAVVRTPPKSPSS-p;u|VVRTPPKSPSSAKSR-p;u|PVVSGDTSPRHLSNV-p;u|NVKSKIGSTENLKHQ-p;u	KTVTPASSAKTSPAK-p;u|VSAGPRPSPLPSPQP-p;u|RGEPNVSYICSRYYR-p;u|PRPSPLPSPQPAPRR-p;u|GAEIVYKSPVVSGDT-p;u|TPEKTVDSQGPTPVC-p;u|TVDSQGPTPVCTPTF-p;u|PLPSGLLTPPQSGKK-p;u|EPGTPPSSPLSAEQL-p;u|RDTYSDRSGSSSPDS-p;u|AGQEEPGTPPSSPLS-p;u|KKFELLPTPPLSPSR-p;u|VVRTPPKSPSSAKSR-p;u|PVVSGDTSPRHLSNV-p;u|KKVAVVRTPPKSPSS-p;u|NVKSKIGSTENLKHQ-p;u	RDTYSDRSGSSSPDS-p;u|PLPSGLLTPPQSGKK-p;u|RGEPNVSYICSRYYR-p;u|TPEKTVDSQGPTPVC-p;u|KKFELLPTPPLSPSR-p;u|TVDSQGPTPVCTPTF-p;u|PRPSPLPSPQPAPRR-p;u|VSAGPRPSPLPSPQP-p;u|KTVTPASSAKTSPAK-p;u|EPGTPPSSPLSAEQL-p;u|AGQEEPGTPPSSPLS-p;u|NVKSKIGSTENLKHQ-p;u|VVRTPPKSPSSAKSR-p;u|KKVAVVRTPPKSPSS-p;u|PVVSGDTSPRHLSNV-p;u	RGEPNVSYICSRYYR-p;u|VSAGPRPSPLPSPQP-p;u|PRPSPLPSPQPAPRR-p;u|RDTYSDRSGSSSPDS-p;u|TPEKTVDSQGPTPVC-p;u|TVDSQGPTPVCTPTF-p;u|AGQEEPGTPPSSPLS-p;u|EPGTPPSSPLSAEQL-p;u|KTVTPASSAKTSPAK-p;u|KKFELLPTPPLSPSR-p;u|GAEIVYKSPVVSGDT-p;u|NVKSKIGSTENLKHQ-p;u|VVRTPPKSPSSAKSR-p;u|KKVAVVRTPPKSPSS-p;u|PVVSGDTSPRHLSNV-p;u
KINASE-PSP_ERK5/MAPK7	n=24|MAPK7_S731|MAPK7_S496|FOS_S32|MAPK7_S774|MAPK7_S421|MEF2A_T312|FOS_T232|MAPK7_T28|DLG1_S158|MEF2A_T319|MAP2K5_S142|MAP2K5_S149|MEF2C_S387|MAPK7_S772|MAP2K5_S129|MEF2A_S355|PML_T409|SGK1_S78|MAP2K5_S137|ETS1_T38|MAPK7_S770|MAPK7_S433|MAPK7_T733|PML_S403	24	20.8	16.7	20.8	20.8	16.7	16.7	16.7	20.8	16.7	20.8	16.7	16.7	20.8	16.7	16.7	20.8	16.7	20.8	16.7	20.8	16.7	16.7	16.7	16.7	16.7	16.7	20.8	20.8	20.8	16.7	16.7	16.7	20.8	16.7	16.7	ASPEAASTPRDPIDV-p;u|AAVSKKASPEAASTP-p;u|LPPVFSGTPKGSGAG-p;u|DPLPPVFSGTPKGSG-p;u|CADVPLLTPSSKEMM-p;u	CADVPLLTPSSKEMM-p;u|LPPVFSGTPKGSGAG-p;u|AAVSKKASPEAASTP-p;u|ASPEAASTPRDPIDV-p;u	ASPEAASTPRDPIDV-p;u|DPLPPVFSGTPKGSG-p;u|AAVSKKASPEAASTP-p;u|LPPVFSGTPKGSGAG-p;u|CADVPLLTPSSKEMM-p;u	AAVSKKASPEAASTP-p;u|ASPEAASTPRDPIDV-p;u|LPPVFSGTPKGSGAG-p;u|DPLPPVFSGTPKGSG-p;u|CADVPLLTPSSKEMM-p;u	CADVPLLTPSSKEMM-p;u|LPPVFSGTPKGSGAG-p;u|AAVSKKASPEAASTP-p;u|ASPEAASTPRDPIDV-p;u	CADVPLLTPSSKEMM-p;u|LPPVFSGTPKGSGAG-p;u|AAVSKKASPEAASTP-p;u|ASPEAASTPRDPIDV-p;u	CADVPLLTPSSKEMM-p;u|LPPVFSGTPKGSGAG-p;u|AAVSKKASPEAASTP-p;u|ASPEAASTPRDPIDV-p;u	DPLPPVFSGTPKGSG-p;u|ASPEAASTPRDPIDV-p;u|AAVSKKASPEAASTP-p;u|LPPVFSGTPKGSGAG-p;u|CADVPLLTPSSKEMM-p;u	CADVPLLTPSSKEMM-p;u|LPPVFSGTPKGSGAG-p;u|AAVSKKASPEAASTP-p;u|ASPEAASTPRDPIDV-p;u	ASPEAASTPRDPIDV-p;u|AAVSKKASPEAASTP-p;u|DPLPPVFSGTPKGSG-p;u|LPPVFSGTPKGSGAG-p;u|CADVPLLTPSSKEMM-p;u	CADVPLLTPSSKEMM-p;u|LPPVFSGTPKGSGAG-p;u|AAVSKKASPEAASTP-p;u|ASPEAASTPRDPIDV-p;u	CADVPLLTPSSKEMM-p;u|LPPVFSGTPKGSGAG-p;u|AAVSKKASPEAASTP-p;u|ASPEAASTPRDPIDV-p;u
KINASE-PSP_P38G/MAPK12	n=13|HSF1_S307|CTNNB1_S605|DLG1_S443|DLG1_S158|MAPT_S396|MAPT_S404|DLG1_T209|PTPN3_S459|HTRA2_S142|HSF1_S303|HSF1_S326|MAPK12_S3|CCND3_T283	13	38.5	38.5	38.5	38.5	38.5	38.5	30.8	38.5	38.5	38.5	30.8	38.5	38.5	30.8	30.8	38.5	38.5	38.5	38.5	38.5	30.8	30.8	38.5	30.8	38.5	30.8	38.5	38.5	38.5	30.8	30.8	30.8	38.5	38.5	38.5	SSVDTLLSPTALIDS-p;u|EPPSPPQSPRVEEAS-p;u|RVKEEPPSPPQSPRV-p;u|GAEIVYKSPVVSGDT-p;u|PVVSGDTSPRHLSNV-p;u	RVKEEPPSPPQSPRV-p;u|EPPSPPQSPRVEEAS-p;u|SSVDTLLSPTALIDS-p;u|GAEIVYKSPVVSGDT-p;u|PVVSGDTSPRHLSNV-p;u	SSVDTLLSPTALIDS-p;u|EPPSPPQSPRVEEAS-p;u|RVKEEPPSPPQSPRV-p;u|GAEIVYKSPVVSGDT-p;u|PVVSGDTSPRHLSNV-p;u	PVVSGDTSPRHLSNV-p;u|GAEIVYKSPVVSGDT-p;u|SSVDTLLSPTALIDS-p;u|EPPSPPQSPRVEEAS-p;u|RVKEEPPSPPQSPRV-p;u	SSVDTLLSPTALIDS-p;u|EPPSPPQSPRVEEAS-p;u|RVKEEPPSPPQSPRV-p;u|GAEIVYKSPVVSGDT-p;u|PVVSGDTSPRHLSNV-p;u	SSVDTLLSPTALIDS-p;u|EPPSPPQSPRVEEAS-p;u|RVKEEPPSPPQSPRV-p;u|GAEIVYKSPVVSGDT-p;u|PVVSGDTSPRHLSNV-p;u	PVVSGDTSPRHLSNV-p;u|EPPSPPQSPRVEEAS-p;u|RVKEEPPSPPQSPRV-p;u|SSVDTLLSPTALIDS-p;u	SSVDTLLSPTALIDS-p;u|EPPSPPQSPRVEEAS-p;u|RVKEEPPSPPQSPRV-p;u|GAEIVYKSPVVSGDT-p;u|PVVSGDTSPRHLSNV-p;u	RVKEEPPSPPQSPRV-p;u|EPPSPPQSPRVEEAS-p;u|SSVDTLLSPTALIDS-p;u|GAEIVYKSPVVSGDT-p;u|PVVSGDTSPRHLSNV-p;u	RVKEEPPSPPQSPRV-p;u|GAEIVYKSPVVSGDT-p;u|EPPSPPQSPRVEEAS-p;u|SSVDTLLSPTALIDS-p;u|PVVSGDTSPRHLSNV-p;u	PVVSGDTSPRHLSNV-p;u|EPPSPPQSPRVEEAS-p;u|RVKEEPPSPPQSPRV-p;u|SSVDTLLSPTALIDS-p;u	RVKEEPPSPPQSPRV-p;u|EPPSPPQSPRVEEAS-p;u|SSVDTLLSPTALIDS-p;u|GAEIVYKSPVVSGDT-p;u|PVVSGDTSPRHLSNV-p;u
KINASE-PSP_ATR	n=88|MCM3_S535|NBN_S343|PRKDC_T2609|RBBP8_T859|ATRIP_S68|CDKN2A_S140|CHEK1_S296|UIMC1_S205|CUX1_S1357|TP53_S37|E2F1_S31|MDM2_S407|DCLRE1C_S516|CHTF18_S74|XPA_S196|SP1_S101|BRCA1_S1280|GINS2_S182|BRCA1_S1457|XPA_S173|PRKDC_T2647|CHEK1_S317|DBF4_S502|PRKDC_S2612|CDKN2A_S8|FARSA_S301|CGGBP1_S164|DCK_S74|FANCD2_S717|NPM1_S125|RPA2_S33|DBF4_T449|FANCD2_T691|CDKN2A_S7|CDKN2A_S152|SMARCAL1_S652|SMC1A_S9…	88	22.7	23.9	22.7	23.9	23.9	23.9	23.9	21.6	22.7	25	25	25	23.9	22.7	22.7	23.9	22.7	22.7	23.9	23.9	23.9	22.7	25	22.7	23.9	23.9	25	22.7	21.6	23.9	22.7	22.7	22.7	21.6	23.9	_MAARRITQETFDAV-p;u|TTPGPSLSQGVSVDE-p;u|MFVETQASQGTLQTR-p;u|PGIHLERSQASTTVD-p;u|SLAFEEGSQSTTISS-p;u|KSPPREGSQGELTPA-p;u|EFRPRSKSQSSSNCS-p;u|LQNRNYPSQEELIKV-p;u|SEKAVLTSQKSSEYP-p;u|SQRLTRYSQGDDDGS-p;u|LCFPENETPPEGKNM-p;u|ISQEEGSSQGEDSVS-p;u|GFSKHIQSNLDFSPV-p;u|EFEELTMSQKNGGNV-p;u|AVEEDAESEDEEEED-p;u|TNDSLTLSQSKSNED-p;u|AIEPAPPSQGAEAKG-p;u|DVEELTASQREAAER-p;u|VHPPLPISQSPENES-p;u|RSESPSLTQERANLS-p;u	SLAFEEGSQSTTISS-p;u|SQRLTRYSQGDDDGS-p;u|TTPGPSLSQGVSVDE-p;u|RSESPSLTQERANLS-p;u|MFVETQASQGTLQTR-p;u|SEKAVLTSQKSSEYP-p;u|EFRPRSKSQSSSNCS-p;u|VPESSKISQENEIGK-p;u|ISQEEGSSQGEDSVS-p;u|AVEEDAESEDEEEED-p;u|EFEELTMSQKNGGNV-p;u|_MAARRITQETFDAV-p;u|DVEELTASQREAAER-p;u|LCFPENETPPEGKNM-p;u|SSTVAGGSQSPKLFS-p;u|LQNRNYPSQEELIKV-p;u|AIEPAPPSQGAEAKG-p;u|TNDSLTLSQSKSNED-p;u|KSPPREGSQGELTPA-p;u|PGIHLERSQASTTVD-p;u…	AIEPAPPSQGAEAKG-p;u|SEKAVLTSQKSSEYP-p;u|EFEELTMSQKNGGNV-p;u|LCFPENETPPEGKNM-p;u|AVEEDAESEDEEEED-p;u|DVEELTASQREAAER-p;u|GFSKHIQSNLDFSPV-p;u|TNDSLTLSQSKSNED-p;u|VHPPLPISQSPENES-p;u|LQNRNYPSQEELIKV-p;u|RSESPSLTQERANLS-p;u|PGIHLERSQASTTVD-p;u|SLAFEEGSQSTTISS-p;u|ISQEEGSSQGEDSVS-p;u|MFVETQASQGTLQTR-p;u|TTPGPSLSQGVSVDE-p;u|KSPPREGSQGELTPA-p;u|SQRLTRYSQGDDDGS-p;u|_MAARRITQETFDAV-p;u|EFRPRSKSQSSSNCS-p;u	SEKAVLTSQKSSEYP-p;u|LQNRNYPSQEELIKV-p;u|EFEELTMSQKNGGNV-p;u|AIEPAPPSQGAEAKG-p;u|AVEEDAESEDEEEED-p;u|TNDSLTLSQSKSNED-p;u|PGIHLERSQASTTVD-p;u|MFVETQASQGTLQTR-p;u|SSTVAGGSQSPKLFS-p;u|SQRLTRYSQGDDDGS-p;u|TTPGPSLSQGVSVDE-p;u|RSESPSLTQERANLS-p;u|VPESSKISQENEIGK-p;u|KSPPREGSQGELTPA-p;u|ISQEEGSSQGEDSVS-p;u|GFSKHIQSNLDFSPV-p;u|LCFPENETPPEGKNM-p;u|EFRPRSKSQSSSNCS-p;u|DVEELTASQREAAER-p;u|VHPPLPISQSPENES-p;u…	_MAARRITQETFDAV-p;u|AVEEDAESEDEEEED-p;u|SQRLTRYSQGDDDGS-p;u|EFEELTMSQKNGGNV-p;u|MFVETQASQGTLQTR-p;u|SEKAVLTSQKSSEYP-p;u|SSTVAGGSQSPKLFS-p;u|TTPGPSLSQGVSVDE-p;u|VPESSKISQENEIGK-p;u|LCFPENETPPEGKNM-p;u|LQNRNYPSQEELIKV-p;u|TNDSLTLSQSKSNED-p;u|SLAFEEGSQSTTISS-p;u|KSPPREGSQGELTPA-p;u|DVEELTASQREAAER-p;u|ISQEEGSSQGEDSVS-p;u|AIEPAPPSQGAEAKG-p;u|VHPPLPISQSPENES-p;u|PGIHLERSQASTTVD-p;u|GFSKHIQSNLDFSPV-p;u…	SLAFEEGSQSTTISS-p;u|MFVETQASQGTLQTR-p;u|AVEEDAESEDEEEED-p;u|_MAARRITQETFDAV-p;u|AIEPAPPSQGAEAKG-p;u|TTPGPSLSQGVSVDE-p;u|LQNRNYPSQEELIKV-p;u|LCFPENETPPEGKNM-p;u|EFEELTMSQKNGGNV-p;u|SSTVAGGSQSPKLFS-p;u|SQRLTRYSQGDDDGS-p;u|ISQEEGSSQGEDSVS-p;u|SEKAVLTSQKSSEYP-p;u|VPESSKISQENEIGK-p;u|KSPPREGSQGELTPA-p;u|VHPPLPISQSPENES-p;u|DVEELTASQREAAER-p;u|EFRPRSKSQSSSNCS-p;u|TNDSLTLSQSKSNED-p;u|PGIHLERSQASTTVD-p;u…	AIEPAPPSQGAEAKG-p;u|SQRLTRYSQGDDDGS-p;u|TTPGPSLSQGVSVDE-p;u|SLAFEEGSQSTTISS-p;u|PGIHLERSQASTTVD-p;u|KSPPREGSQGELTPA-p;u|RSESPSLTQERANLS-p;u|EFEELTMSQKNGGNV-p;u|MFVETQASQGTLQTR-p;u|ISQEEGSSQGEDSVS-p;u|SEKAVLTSQKSSEYP-p;u|AVEEDAESEDEEEED-p;u|VHPPLPISQSPENES-p;u|VPESSKISQENEIGK-p;u|LCFPENETPPEGKNM-p;u|EFRPRSKSQSSSNCS-p;u|DVEELTASQREAAER-p;u|TNDSLTLSQSKSNED-p;u|LQNRNYPSQEELIKV-p;u|_MAARRITQETFDAV-p;u…	TTPGPSLSQGVSVDE-p;u|SQRLTRYSQGDDDGS-p;u|ISQEEGSSQGEDSVS-p;u|AVEEDAESEDEEEED-p;u|MFVETQASQGTLQTR-p;u|SLAFEEGSQSTTISS-p;u|LCFPENETPPEGKNM-p;u|TNDSLTLSQSKSNED-p;u|AIEPAPPSQGAEAKG-p;u|KSPPREGSQGELTPA-p;u|SEKAVLTSQKSSEYP-p;u|PGIHLERSQASTTVD-p;u|LQNRNYPSQEELIKV-p;u|EFEELTMSQKNGGNV-p;u|VHPPLPISQSPENES-p;u|DVEELTASQREAAER-p;u|GFSKHIQSNLDFSPV-p;u|EFRPRSKSQSSSNCS-p;u|RSESPSLTQERANLS-p;u	SQRLTRYSQGDDDGS-p;u|MFVETQASQGTLQTR-p;u|EFEELTMSQKNGGNV-p;u|TNDSLTLSQSKSNED-p;u|LCFPENETPPEGKNM-p;u|EFRPRSKSQSSSNCS-p;u|AVEEDAESEDEEEED-p;u|KSPPREGSQGELTPA-p;u|SSTVAGGSQSPKLFS-p;u|AIEPAPPSQGAEAKG-p;u|ISQEEGSSQGEDSVS-p;u|SLAFEEGSQSTTISS-p;u|LQNRNYPSQEELIKV-p;u|VHPPLPISQSPENES-p;u|TTPGPSLSQGVSVDE-p;u|SEKAVLTSQKSSEYP-p;u|DVEELTASQREAAER-p;u|VPESSKISQENEIGK-p;u|RSESPSLTQERANLS-p;u|GFSKHIQSNLDFSPV-p;u	TTPGPSLSQGVSVDE-p;u|PGIHLERSQASTTVD-p;u|MFVETQASQGTLQTR-p;u|SLAFEEGSQSTTISS-p;u|LQNRNYPSQEELIKV-p;u|AVEEDAESEDEEEED-p;u|VPESSKISQENEIGK-p;u|KSPPREGSQGELTPA-p;u|SEKAVLTSQKSSEYP-p;u|AIEPAPPSQGAEAKG-p;u|EFEELTMSQKNGGNV-p;u|GFSKHIQSNLDFSPV-p;u|TNDSLTLSQSKSNED-p;u|_MAARRITQETFDAV-p;u|SQRLTRYSQGDDDGS-p;u|RSESPSLTQERANLS-p;u|ISQEEGSSQGEDSVS-p;u|DVEELTASQREAAER-p;u|LCFPENETPPEGKNM-p;u|VHPPLPISQSPENES-p;u…	EFEELTMSQKNGGNV-p;u|AVEEDAESEDEEEED-p;u|SLAFEEGSQSTTISS-p;u|SQRLTRYSQGDDDGS-p;u|SSTVAGGSQSPKLFS-p;u|MFVETQASQGTLQTR-p;u|_MAARRITQETFDAV-p;u|TTPGPSLSQGVSVDE-p;u|DVEELTASQREAAER-p;u|VPESSKISQENEIGK-p;u|TNDSLTLSQSKSNED-p;u|ISQEEGSSQGEDSVS-p;u|PGIHLERSQASTTVD-p;u|EFRPRSKSQSSSNCS-p;u|LQNRNYPSQEELIKV-p;u|LCFPENETPPEGKNM-p;u|KSPPREGSQGELTPA-p;u|SEKAVLTSQKSSEYP-p;u|AIEPAPPSQGAEAKG-p;u|VHPPLPISQSPENES-p;u…	AVEEDAESEDEEEED-p;u|AIEPAPPSQGAEAKG-p;u|EFRPRSKSQSSSNCS-p;u|GFSKHIQSNLDFSPV-p;u|SQRLTRYSQGDDDGS-p;u|DVEELTASQREAAER-p;u|_MAARRITQETFDAV-p;u|SSTVAGGSQSPKLFS-p;u|ISQEEGSSQGEDSVS-p;u|MFVETQASQGTLQTR-p;u|TTPGPSLSQGVSVDE-p;u|EFEELTMSQKNGGNV-p;u|TNDSLTLSQSKSNED-p;u|KSPPREGSQGELTPA-p;u|VHPPLPISQSPENES-p;u|VPESSKISQENEIGK-p;u|PGIHLERSQASTTVD-p;u|SEKAVLTSQKSSEYP-p;u|LCFPENETPPEGKNM-p;u|LQNRNYPSQEELIKV-p;u…
KINASE-PSP_TAK1/MAP3K7	n=33|POLD2_T33|HDAC7_S155|HDAC4_S246|TUBA1B_T334|PTPN3_S359|MAP2K6_S207|EIF4B_S230|HNRNPA2B1_T176|MAP2K6_T211|TUBB_T166|KSR1_S406|TAB1_S457|FLNA_T1286|RBMX_T216|MAP3K7_T184|TAB1_S452|MAP3K7_S192|TAB1_S456|MAP3K7_T187|TAB1_S453|GAPVD1_T1013|PRKAA2_T172|GAPVD1_S1012|E2F1_S337|HSP90B1_S674|HSP90B1_T669|ATAT1_S237|HDAC5_S259|HSP90B1_T675|RAB1A_T75|MAP3K7_T178|EEF1A1_T261|LDHA_T3	33	24.2	24.2	24.2	24.2	21.2	24.2	24.2	24.2	24.2	24.2	24.2	24.2	24.2	24.2	24.2	24.2	24.2	24.2	21.2	24.2	24.2	24.2	24.2	24.2	24.2	24.2	24.2	24.2	24.2	24.2	24.2	24.2	24.2	21.2	21.2	KYRDRYDSDRYRDGY-p;u|TRLRRTESVPSDINN-p;u|FPLRKTVSEPNLKLR-p;u|DVNAAIATIKTKRSI-p;u|AGQERFRTITSSYYR-p;u|PRDDGYSTKDSYSSR-p;u|FPLRKTASEPNLKVR-p;u|PAMRRSLSVEHLETK-p;u	PAMRRSLSVEHLETK-p;u|AGQERFRTITSSYYR-p;u|KYRDRYDSDRYRDGY-p;u|FPLRKTVSEPNLKLR-p;u|DVNAAIATIKTKRSI-p;u|PRDDGYSTKDSYSSR-p;u|TRLRRTESVPSDINN-p;u|FPLRKTASEPNLKVR-p;u	FPLRKTASEPNLKVR-p;u|PAMRRSLSVEHLETK-p;u|DVNAAIATIKTKRSI-p;u|TRLRRTESVPSDINN-p;u|KYRDRYDSDRYRDGY-p;u|PRDDGYSTKDSYSSR-p;u|AGQERFRTITSSYYR-p;u|FPLRKTVSEPNLKLR-p;u	KYRDRYDSDRYRDGY-p;u|DVNAAIATIKTKRSI-p;u|TRLRRTESVPSDINN-p;u|FPLRKTASEPNLKVR-p;u|FPLRKTVSEPNLKLR-p;u|PRDDGYSTKDSYSSR-p;u|PAMRRSLSVEHLETK-p;u|AGQERFRTITSSYYR-p;u	PAMRRSLSVEHLETK-p;u|KYRDRYDSDRYRDGY-p;u|FPLRKTASEPNLKVR-p;u|DVNAAIATIKTKRSI-p;u|AGQERFRTITSSYYR-p;u|PRDDGYSTKDSYSSR-p;u|FPLRKTVSEPNLKLR-p;u	DVNAAIATIKTKRSI-p;u|KYRDRYDSDRYRDGY-p;u|PAMRRSLSVEHLETK-p;u|PRDDGYSTKDSYSSR-p;u|FPLRKTASEPNLKVR-p;u|AGQERFRTITSSYYR-p;u|TRLRRTESVPSDINN-p;u|FPLRKTVSEPNLKLR-p;u	DVNAAIATIKTKRSI-p;u|KYRDRYDSDRYRDGY-p;u|TRLRRTESVPSDINN-p;u|FPLRKTASEPNLKVR-p;u|PRDDGYSTKDSYSSR-p;u|FPLRKTVSEPNLKLR-p;u|AGQERFRTITSSYYR-p;u|PAMRRSLSVEHLETK-p;u	DVNAAIATIKTKRSI-p;u|KYRDRYDSDRYRDGY-p;u|PRDDGYSTKDSYSSR-p;u|PAMRRSLSVEHLETK-p;u|TRLRRTESVPSDINN-p;u|FPLRKTASEPNLKVR-p;u|AGQERFRTITSSYYR-p;u|FPLRKTVSEPNLKLR-p;u	FPLRKTASEPNLKVR-p;u|DVNAAIATIKTKRSI-p;u|PAMRRSLSVEHLETK-p;u|KYRDRYDSDRYRDGY-p;u|FPLRKTVSEPNLKLR-p;u|TRLRRTESVPSDINN-p;u|AGQERFRTITSSYYR-p;u|PRDDGYSTKDSYSSR-p;u	DVNAAIATIKTKRSI-p;u|FPLRKTASEPNLKVR-p;u|KYRDRYDSDRYRDGY-p;u|TRLRRTESVPSDINN-p;u|PAMRRSLSVEHLETK-p;u|AGQERFRTITSSYYR-p;u|PRDDGYSTKDSYSSR-p;u|FPLRKTVSEPNLKLR-p;u	PAMRRSLSVEHLETK-p;u|KYRDRYDSDRYRDGY-p;u|DVNAAIATIKTKRSI-p;u|PRDDGYSTKDSYSSR-p;u|TRLRRTESVPSDINN-p;u|AGQERFRTITSSYYR-p;u|FPLRKTASEPNLKVR-p;u|FPLRKTVSEPNLKLR-p;u	FPLRKTVSEPNLKLR-p;u|PAMRRSLSVEHLETK-p;u|KYRDRYDSDRYRDGY-p;u|PRDDGYSTKDSYSSR-p;u|FPLRKTASEPNLKVR-p;u|AGQERFRTITSSYYR-p;u|TRLRRTESVPSDINN-p;u|DVNAAIATIKTKRSI-p;u
KINASE-PSP_INSR	n=45|IRS1_Y989|INSR_Y1173|BLVRA_Y228|INSR_S1302|PIK3R1_Y607|GAB1_Y242|ARHGAP5_Y306|DOK1_Y398|INSR_Y1177|BLVRA_Y291|PTEN_Y174|PIK3R3_Y341|INSR_S1348|GAB1_Y447|GAB1_Y472|INSR_Y1343|IRS1_Y896|INSR_Y992|INSR_Y1349|INSR_Y1178|PTPN6_Y536|DOK1_Y362|PTEN_Y27|PHB_Y114|PIK3R1_Y368|CCDC88C_Y2025|GAB1_Y659|GAB1_Y373|INSR_Y999|NFKBIA_Y42|IRS1_Y1179|GAB1_Y285|INSR_S1314|GAB1_Y589|INSR_S1336|PPP2CA_Y307|INSR_Y1…	38	23.7	23.7	23.7	23.7	21.1	23.7	23.7	23.7	23.7	23.7	23.7	23.7	23.7	23.7	23.7	23.7	23.7	23.7	21.1	23.7	23.7	23.7	23.7	23.7	23.7	23.7	23.7	23.7	15.8	23.7	23.7	23.7	23.7	18.4	21.1	DIYETDYYRKGGKGL-p;u|FGMTRDIYETDYYRK-p;u|RDIYETDYYRKGGKG-p;u|QKGQESEYGNITYPP-p;u|VADERVDYVVVDQQK-p;u|KGDKQVEYLDLDLDS-p;u|VPSSRGDYMTMQMSC-p;u|LRKTRDQYLMWLTQK-p;u|ASDTDSSYCIPTAGM-p;u	ARVKEEGYELPYNPA-p;u|ASDTDSSYCIPTAGM-p;u|KGDKQVEYLDLDLDS-p;u|QKGQESEYGNITYPP-p;u|VADERVDYVVVDQQK-p;u|LRKTRDQYLMWLTQK-p;u|RDIYETDYYRKGGKG-p;u|FGMTRDIYETDYYRK-p;u|DIYETDYYRKGGKGL-p;u	DIYETDYYRKGGKGL-p;u|FGMTRDIYETDYYRK-p;u|RDIYETDYYRKGGKG-p;u|QKGQESEYGNITYPP-p;u|ASDTDSSYCIPTAGM-p;u|ARVKEEGYELPYNPA-p;u|VADERVDYVVVDQQK-p;u|KGDKQVEYLDLDLDS-p;u|LRKTRDQYLMWLTQK-p;u	VADERVDYVVVDQQK-p;u|LRKTRDQYLMWLTQK-p;u|KGDKQVEYLDLDLDS-p;u|ASDTDSSYCIPTAGM-p;u|QKGQESEYGNITYPP-p;u|RDIYETDYYRKGGKG-p;u|DIYETDYYRKGGKGL-p;u|FGMTRDIYETDYYRK-p;u|VPSSRGDYMTMQMSC-p;u	VADERVDYVVVDQQK-p;u|KGDKQVEYLDLDLDS-p;u|QKGQESEYGNITYPP-p;u|ASDTDSSYCIPTAGM-p;u|DIYETDYYRKGGKGL-p;u|RDIYETDYYRKGGKG-p;u|FGMTRDIYETDYYRK-p;u|LRKTRDQYLMWLTQK-p;u	ARVKEEGYELPYNPA-p;u|ASDTDSSYCIPTAGM-p;u|KGDKQVEYLDLDLDS-p;u|VADERVDYVVVDQQK-p;u|QKGQESEYGNITYPP-p;u|LRKTRDQYLMWLTQK-p;u|RDIYETDYYRKGGKG-p;u|FGMTRDIYETDYYRK-p;u|DIYETDYYRKGGKGL-p;u	LRKTRDQYLMWLTQK-p;u|KGDKQVEYLDLDLDS-p;u|ASDTDSSYCIPTAGM-p;u|VADERVDYVVVDQQK-p;u|QKGQESEYGNITYPP-p;u|ARVKEEGYELPYNPA-p;u|FGMTRDIYETDYYRK-p;u|DIYETDYYRKGGKGL-p;u|RDIYETDYYRKGGKG-p;u	QKGQESEYGNITYPP-p;u|DIYETDYYRKGGKGL-p;u|FGMTRDIYETDYYRK-p;u|ASDTDSSYCIPTAGM-p;u|RDIYETDYYRKGGKG-p;u|KGDKQVEYLDLDLDS-p;u|VADERVDYVVVDQQK-p;u|LRKTRDQYLMWLTQK-p;u|VPSSRGDYMTMQMSC-p;u	ASDTDSSYCIPTAGM-p;u|KGDKQVEYLDLDLDS-p;u|VADERVDYVVVDQQK-p;u|RDIYETDYYRKGGKG-p;u|VPSSRGDYMTMQMSC-p;u|FGMTRDIYETDYYRK-p;u|DIYETDYYRKGGKGL-p;u|LRKTRDQYLMWLTQK-p;u|QKGQESEYGNITYPP-p;u	ARVKEEGYELPYNPA-p;u|QKGQESEYGNITYPP-p;u|LRKTRDQYLMWLTQK-p;u|KGDKQVEYLDLDLDS-p;u|VADERVDYVVVDQQK-p;u|ASDTDSSYCIPTAGM-p;u|FGMTRDIYETDYYRK-p;u|RDIYETDYYRKGGKG-p;u|DIYETDYYRKGGKGL-p;u	DIYETDYYRKGGKGL-p;u|RDIYETDYYRKGGKG-p;u|FGMTRDIYETDYYRK-p;u|VPSSRGDYMTMQMSC-p;u|VADERVDYVVVDQQK-p;u|KGDKQVEYLDLDLDS-p;u|QKGQESEYGNITYPP-p;u|ASDTDSSYCIPTAGM-p;u|LRKTRDQYLMWLTQK-p;u	ASDTDSSYCIPTAGM-p;u|KGDKQVEYLDLDLDS-p;u|VADERVDYVVVDQQK-p;u|VPSSRGDYMTMQMSC-p;u|QKGQESEYGNITYPP-p;u|DIYETDYYRKGGKGL-p;u|FGMTRDIYETDYYRK-p;u|RDIYETDYYRKGGKG-p;u|LRKTRDQYLMWLTQK-p;u
KINASE-PSP_CK2A2/CSNK2A2	n=19|XRCC1_T488|CTNNB1_T112|SRPK1_S555|SMC3_S1067|CSNK2B_S3|XRCC1_S485|CCNH_T315|SRPK1_S51|XRCC1_T523|CTNNB1_S29|XRCC1_S518|XRCC1_T519|CDC37_S13|CTNNB1_T102|NKX3-1_T89|TYMS_S124|HSF1_T142|NKX3-1_T93|CSNK2B_S2	19	26.3	26.3	26.3	26.3	26.3	26.3	26.3	26.3	26.3	26.3	26.3	26.3	26.3	26.3	26.3	26.3	26.3	26.3	26.3	26.3	26.3	26.3	26.3	26.3	26.3	26.3	26.3	26.3	26.3	26.3	26.3	26.3	26.3	26.3	26.3	KHEEEEWTDDDLVES-p;u|GDVEGSQSQDEGEGS-p;u|GAEDSGDTEDELRRV-p;u|QDNGAEDSGDTEDEL-p;u|QEEEILGSDDDEQED-p;u	GDVEGSQSQDEGEGS-p;u|GAEDSGDTEDELRRV-p;u|QDNGAEDSGDTEDEL-p;u|KHEEEEWTDDDLVES-p;u|QEEEILGSDDDEQED-p;u	QEEEILGSDDDEQED-p;u|GAEDSGDTEDELRRV-p;u|QDNGAEDSGDTEDEL-p;u|KHEEEEWTDDDLVES-p;u|GDVEGSQSQDEGEGS-p;u	QEEEILGSDDDEQED-p;u|KHEEEEWTDDDLVES-p;u|QDNGAEDSGDTEDEL-p;u|GAEDSGDTEDELRRV-p;u|GDVEGSQSQDEGEGS-p;u	KHEEEEWTDDDLVES-p;u|QEEEILGSDDDEQED-p;u|QDNGAEDSGDTEDEL-p;u|GAEDSGDTEDELRRV-p;u|GDVEGSQSQDEGEGS-p;u	GDVEGSQSQDEGEGS-p;u|KHEEEEWTDDDLVES-p;u|QEEEILGSDDDEQED-p;u|QDNGAEDSGDTEDEL-p;u|GAEDSGDTEDELRRV-p;u	GDVEGSQSQDEGEGS-p;u|KHEEEEWTDDDLVES-p;u|QEEEILGSDDDEQED-p;u|QDNGAEDSGDTEDEL-p;u|GAEDSGDTEDELRRV-p;u	GDVEGSQSQDEGEGS-p;u|KHEEEEWTDDDLVES-p;u|QEEEILGSDDDEQED-p;u|QDNGAEDSGDTEDEL-p;u|GAEDSGDTEDELRRV-p;u	QEEEILGSDDDEQED-p;u|QDNGAEDSGDTEDEL-p;u|GAEDSGDTEDELRRV-p;u|KHEEEEWTDDDLVES-p;u|GDVEGSQSQDEGEGS-p;u	KHEEEEWTDDDLVES-p;u|GDVEGSQSQDEGEGS-p;u|QEEEILGSDDDEQED-p;u|QDNGAEDSGDTEDEL-p;u|GAEDSGDTEDELRRV-p;u	KHEEEEWTDDDLVES-p;u|QEEEILGSDDDEQED-p;u|GDVEGSQSQDEGEGS-p;u|QDNGAEDSGDTEDEL-p;u|GAEDSGDTEDELRRV-p;u	KHEEEEWTDDDLVES-p;u|GDVEGSQSQDEGEGS-p;u|QEEEILGSDDDEQED-p;u|QDNGAEDSGDTEDEL-p;u|GAEDSGDTEDELRRV-p;u
KINASE-PSP_TBK1	n=42|PELI1_T80|SQSTM1_S403|OPTN_S177|RPS6KB1_S447|OPTN_S473|SMCR8_T796|IRF3_T404|IRF3_S386|E2F1_S332|PELI1_T288|IRF7_S477|IRF3_S396|IRF7_S471|SIKE1_S185|AKT1_S473|STAT6_S407|TBK1_S172|IRF7_S472|SMCR8_S402|SIKE1_S198|RPS6KB1_T444|IRF3_S398|IRF5_S293|PELI1_S293|SIKE1_S188|SIKE1_S133|RELA_S536|IRF7_S479|PELI1_S76|IRF3_S402|OPTN_S513|IRF3_S385|PEBP1_S109|IRF3_S175|ESR1_S305|TMEM173_S358|IRF3_S173|SIK…	42	16.7	14.3	14.3	16.7	11.9	14.3	14.3	16.7	14.3	14.3	14.3	14.3	16.7	14.3	14.3	16.7	14.3	14.3	11.9	14.3	14.3	14.3	14.3	14.3	14.3	14.3	14.3	16.7	14.3	14.3	14.3	14.3	16.7	11.9	11.9	PQPLRSPSLDNPTPF-p;u|SSGSSEDSFVEIRMA-p;u|RFIGSPRTPVSPVKF-p;u|GSPRTPVSPVKFSPG-p;u|PCPQPLRSPSLDNPT-p;u|KDGATMKTFCGTPEY-p;u|RPHFPQFSYSASGTA-p;u	PQPLRSPSLDNPTPF-p;u|PCPQPLRSPSLDNPT-p;u|SSGSSEDSFVEIRMA-p;u|RPHFPQFSYSASGTA-p;u|RFIGSPRTPVSPVKF-p;u|GSPRTPVSPVKFSPG-p;u	RFIGSPRTPVSPVKF-p;u|SSGSSEDSFVEIRMA-p;u|PQPLRSPSLDNPTPF-p;u|GSPRTPVSPVKFSPG-p;u|PCPQPLRSPSLDNPT-p;u|RPHFPQFSYSASGTA-p;u	PQPLRSPSLDNPTPF-p;u|RPHFPQFSYSASGTA-p;u|KDGATMKTFCGTPEY-p;u|SSGSSEDSFVEIRMA-p;u|RFIGSPRTPVSPVKF-p;u|PCPQPLRSPSLDNPT-p;u|GSPRTPVSPVKFSPG-p;u	PCPQPLRSPSLDNPT-p;u|PQPLRSPSLDNPTPF-p;u|SSGSSEDSFVEIRMA-p;u|RFIGSPRTPVSPVKF-p;u|GSPRTPVSPVKFSPG-p;u	RFIGSPRTPVSPVKF-p;u|RPHFPQFSYSASGTA-p;u|PQPLRSPSLDNPTPF-p;u|SSGSSEDSFVEIRMA-p;u|PCPQPLRSPSLDNPT-p;u|GSPRTPVSPVKFSPG-p;u	SSGSSEDSFVEIRMA-p;u|RPHFPQFSYSASGTA-p;u|PQPLRSPSLDNPTPF-p;u|PCPQPLRSPSLDNPT-p;u|RFIGSPRTPVSPVKF-p;u|GSPRTPVSPVKFSPG-p;u	PQPLRSPSLDNPTPF-p;u|SSGSSEDSFVEIRMA-p;u|KDGATMKTFCGTPEY-p;u|RPHFPQFSYSASGTA-p;u|PCPQPLRSPSLDNPT-p;u|GSPRTPVSPVKFSPG-p;u|RFIGSPRTPVSPVKF-p;u	RFIGSPRTPVSPVKF-p;u|GSPRTPVSPVKFSPG-p;u|SSGSSEDSFVEIRMA-p;u|KDGATMKTFCGTPEY-p;u|PQPLRSPSLDNPTPF-p;u|PCPQPLRSPSLDNPT-p;u	PQPLRSPSLDNPTPF-p;u|SSGSSEDSFVEIRMA-p;u|PCPQPLRSPSLDNPT-p;u|RPHFPQFSYSASGTA-p;u|GSPRTPVSPVKFSPG-p;u|RFIGSPRTPVSPVKF-p;u	PCPQPLRSPSLDNPT-p;u|KDGATMKTFCGTPEY-p;u|SSGSSEDSFVEIRMA-p;u|PQPLRSPSLDNPTPF-p;u|RFIGSPRTPVSPVKF-p;u|GSPRTPVSPVKFSPG-p;u	PQPLRSPSLDNPTPF-p;u|PCPQPLRSPSLDNPT-p;u|SSGSSEDSFVEIRMA-p;u|KDGATMKTFCGTPEY-p;u|RFIGSPRTPVSPVKF-p;u|GSPRTPVSPVKFSPG-p;u
KINASE-PSP_GSK3B	n=230|PRKAA1_T490|TOP2A_S1361|SREBF1_S434|MAPT_T231|RPTOR_S859|EIF4EBP1_S65|STK38_S6|BCAM_S596|NFKB2_S711|FOXL2_S33|OGT_S3|PSEN1_S353|MAPT_S202|CLASP2_S507|BORA_S278|SNAI1_S104|RXRA_S49|MAPT_S199|JUN_S243|SUFU_S342|APBB1_T579|ESR1_S102|TNKS_T982|RASSF1_S179|PIAS1_S17|MUC1_S1227|SREBF1_S430|NEFH_S503|DNM1L_S40|STK38_T7|ESR1_S118|MAPT_S400|GATA6_S37|TNKS_S978|JUNB_T255|CDC25A_S76|DROSHA_S302|DSP_S2…	230	24.3	23.9	25.2	22.6	22.2	23.9	24.3	22.6	22.6	25.2	23.5	22.6	22.6	23.9	23.5	22.6	22.6	24.8	22.2	24.3	24.3	23.5	22.6	23.9	23.9	24.3	25.2	24.3	23	24.3	23.5	23.9	24.3	21.7	22.2	QPIHDSKSPGASNLK-p;u|FLMECRNSPVTKTPP-p;u|DEITEAKSGTATPQR-p;u|RGEPNVSYICSRYYR-p;u|RPASVPPSPSLSRHS-p;u|REASRESSRDTSPVR-p;u|GGTLFSTTPGGTRII-p;u|QGCSREASRESSRDT-p;u|DPLLSSVSPGASKTS-p;u|NPFSNGGSPAAEAVS-p;u|KTVTPASSAKTSPAK-p;u|SVTPKTVTPASSAKT-p;u|GISSMSSSPSRETVG-p;u|RNSPVTKTPPRDLPT-p;u|TAPAETATPAPVEKS-p;u|AILNPPPSPATERSH-p;u|PVCEVSVTPKTVTPA-p;u|DEGHSNSSPRHSEAA-p;u|PPGEPGLSHSGSEQP-p;u|PRGMGPGTPAGYGRG-p;u…	QPIHDSKSPGASNLK-p;u|EPEGPPPSPGKGGGG-p;u|RGEPNVSYICSRYYR-p;u|PRGMGPGTPAGYGRG-p;u|EPRSGTNSPPPPFSD-p;u|RVKEEPPSPPQSPRV-p;u|STPKSKQSPISTPTS-p;u|EAKSGTATPQRSGSV-p;u|RPASVPPSPSLSRHS-p;u|QTVPEARSRDATPPV-p;u|EARSRDATPPVSPIN-p;u|NPFSNGGSPAAEAVS-p;u|TPEKTVDSQGPTPVC-p;u|RNSPVTKTPPRDLPT-p;u|PPGDYSTTPGGTLFS-p;u|KLDTFCGSPPYAAPE-p;u|GISSMSSSPSRETVG-p;u|TAPAETATPAPVEKS-p;u|PGETPPLSPIDMESQ-p;u|DEITEAKSGTATPQR-p;u…	PPSSTDRSPYEKVSA-p;u|DEITEAKSGTATPQR-p;u|EAKSGTATPQRSGSV-p;u|QGCSREASRESSRDT-p;u|REASRESSRDTSPVR-p;u|PRLRSVSSYGNIRAV-p;u|QTVPEARSRDATPPV-p;u|KSTFREESPLRIKMI-p;u|EARSRDATPPVSPIN-p;u|PLPSGLLTPPQSGKK-p;u|RGEPNVSYICSRYYR-p;u|KKFELLPTPPLSPSR-p;u|SETVSEASPGSTASQ-p;u|QGCSREASPSRLSVA-p;u|SEEDRSKSAPTSPCD-p;u|DEGHSNSSPRHSEAA-p;u|NPFSNGGSPAAEAVS-p;u|TVDSQGPTPVCTPTF-p;u|TKNGLPGSRPGSPER-p;u|TPEKTVDSQGPTPVC-p;u…	GDRSGYSSPGSPGTP-p;u|DEITEAKSGTATPQR-p;u|PVVSGDTSPRHLSNV-p;u|FLMECRNSPVTKTPP-p;u|GAEIVYKSPVVSGDT-p;u|SGYSSPGSPGTPGSR-p;u|TPGSRSRTPSLPTPP-p;u|DEGHSNSSPRHSEAA-p;u|RGEPNVSYICSRYYR-p;u|EPGTPPSSPLSAEQL-p;u|KTPPAPKTPPSSGEP-p;u|KTVTPASSAKTSPAK-p;u|EARSRDATPPVSPIN-p;u|PVCEVSVTPKTVTPA-p;u|RPASVPPSPSLSRHS-p;u|QTVPEARSRDATPPV-p;u|GGTLFSTTPGGTRII-p;u|AGQEEPGTPPSSPLS-p;u|SVTPKTVTPASSAKT-p;u|KKFELLPTPPLSPSR-p;u…	RGEPNVSYICSRYYR-p;u|EARSRDATPPVSPIN-p;u|SETVSEASPGSTASQ-p;u|DPLLSSVSPGASKTS-p;u|QTVPEARSRDATPPV-p;u|DEITEAKSGTATPQR-p;u|REASRESSRDTSPVR-p;u|EPRSGTNSPPPPFSD-p;u|TVDSQGPTPVCTPTF-p;u|QGCSREASRESSRDT-p;u|GGTLFSTTPGGTRII-p;u|AILNPPPSPATERSH-p;u|TKNGLPGSRPGSPER-p;u|TPEKTVDSQGPTPVC-p;u|GISSMSSSPSRETVG-p;u|PVCEVSVTPKTVTPA-p;u|SVTPKTVTPASSAKT-p;u|RVKEEPPSPPQSPRV-p;u|KTVTPASSAKTSPAK-p;u|KLDTFCGSPPYAAPE-p;u…	DEITEAKSGTATPQR-p;u|RGEPNVSYICSRYYR-p;u|EARSRDATPPVSPIN-p;u|QTVPEARSRDATPPV-p;u|DEGHSNSSPRHSEAA-p;u|NPFSNGGSPAAEAVS-p;u|PRLRSVSSYGNIRAV-p;u|REASRESSRDTSPVR-p;u|QGCSREASRESSRDT-p;u|TPEKTVDSQGPTPVC-p;u|SETVSEASPGSTASQ-p;u|EAKSGTATPQRSGSV-p;u|GISSMSSSPSRETVG-p;u|TKNGLPGSRPGSPER-p;u|PPGDYSTTPGGTLFS-p;u|EPRSGTNSPPPPFSD-p;u|RVKEEPPSPPQSPRV-p;u|LTQSAPASPTNKGVH-p;u|STPKSKQSPISTPTS-p;u|DTSSLTQSAPASPTN-p;u…	STPKSKQSPISTPTS-p;u|TPGSRSRTPSLPTPP-p;u|VVRTPPKSPSSAKSR-p;u|KKVAVVRTPPKSPSS-p;u|PVVSGDTSPRHLSNV-p;u|GDRSGYSSPGSPGTP-p;u|KTPPAPKTPPSSGEP-p;u|TAPAETATPAPVEKS-p;u|SGYSSPGSPGTPGSR-p;u|DEGHSNSSPRHSEAA-p;u|NVKSKIGSTENLKHQ-p;u|KTVTPASSAKTSPAK-p;u|PRLRSVSSYGNIRAV-p;u|SVTPKTVTPASSAKT-p;u|NPFSNGGSPAAEAVS-p;u|TKNGLPGSRPGSPER-p;u|PRGMGPGTPAGYGRG-p;u|DEITEAKSGTATPQR-p;u|EAKSGTATPQRSGSV-p;u|RGEPNVSYICSRYYR-p;u…	PRLRSVSSYGNIRAV-p;u|RPASVPPSPSLSRHS-p;u|EARSRDATPPVSPIN-p;u|FLMECRNSPVTKTPP-p;u|DEITEAKSGTATPQR-p;u|QTVPEARSRDATPPV-p;u|RGEPNVSYICSRYYR-p;u|SEEDRSKSAPTSPCD-p;u|QPIHDSKSPGASNLK-p;u|EPRSGTNSPPPPFSD-p;u|REASRESSRDTSPVR-p;u|GISSMSSSPSRETVG-p;u|PPSSTDRSPYEKVSA-p;u|QGCSREASRESSRDT-p;u|RVKEEPPSPPQSPRV-p;u|DTSSLTQSAPASPTN-p;u|AILNPPPSPATERSH-p;u|LTQSAPASPTNKGVH-p;u|RNSPVTKTPPRDLPT-p;u|SETVSEASPGSTASQ-p;u…	EARSRDATPPVSPIN-p;u|PRLRSVSSYGNIRAV-p;u|QTVPEARSRDATPPV-p;u|DEITEAKSGTATPQR-p;u|DPLLSSVSPGASKTS-p;u|KTVTPASSAKTSPAK-p;u|RVKEEPPSPPQSPRV-p;u|QGCSREASRESSRDT-p;u|REASRESSRDTSPVR-p;u|GISSMSSSPSRETVG-p;u|LTQSAPASPTNKGVH-p;u|DEGHSNSSPRHSEAA-p;u|DTSSLTQSAPASPTN-p;u|TKNGLPGSRPGSPER-p;u|RPASVPPSPSLSRHS-p;u|TPEKTVDSQGPTPVC-p;u|GGTLFSTTPGGTRII-p;u|SETVSEASPGSTASQ-p;u|EPRSGTNSPPPPFSD-p;u|SVTPKTVTPASSAKT-p;u…	FLMECRNSPVTKTPP-p;u|PPSSTDRSPYEKVSA-p;u|PRLRSVSSYGNIRAV-p;u|KSTFREESPLRIKMI-p;u|SVTPKTVTPASSAKT-p;u|EAKSGTATPQRSGSV-p;u|GISSMSSSPSRETVG-p;u|EARSRDATPPVSPIN-p;u|QTVPEARSRDATPPV-p;u|RVKEEPPSPPQSPRV-p;u|TAPAETATPAPVEKS-p;u|KTVTPASSAKTSPAK-p;u|SEEDRSKSAPTSPCD-p;u|DTSSLTQSAPASPTN-p;u|QGCSREASRESSRDT-p;u|NPFSNGGSPAAEAVS-p;u|EPRSGTNSPPPPFSD-p;u|RGEPNVSYICSRYYR-p;u|LTQSAPASPTNKGVH-p;u|STPKSKQSPISTPTS-p;u…	QPIHDSKSPGASNLK-p;u|PRLRSVSSYGNIRAV-p;u|DEITEAKSGTATPQR-p;u|QGCSREASRESSRDT-p;u|REASRESSRDTSPVR-p;u|PPSSTDRSPYEKVSA-p;u|EARSRDATPPVSPIN-p;u|KLDTFCGSPPYAAPE-p;u|NPFSNGGSPAAEAVS-p;u|QTVPEARSRDATPPV-p;u|PLPSGLLTPPQSGKK-p;u|GISSMSSSPSRETVG-p;u|RGEPNVSYICSRYYR-p;u|SETVSEASPGSTASQ-p;u|VPEMPGETPPLSPID-p;u|RPASVPPSPSLSRHS-p;u|EPRSGTNSPPPPFSD-p;u|PPGDYSTTPGGTLFS-p;u|LTQSAPASPTNKGVH-p;u|RNSPVTKTPPRDLPT-p;u…	RGEPNVSYICSRYYR-p;u|PPGEPGLSHSGSEQP-p;u|NPFSNGGSPAAEAVS-p;u|DEITEAKSGTATPQR-p;u|EPRSGTNSPPPPFSD-p;u|GRLPNNSSRPSTPTI-p;u|QTVPEARSRDATPPV-p;u|TPEKTVDSQGPTPVC-p;u|TAPAETATPAPVEKS-p;u|NNSSRPSTPTINVLE-p;u|AILNPPPSPATERSH-p;u|SETVSEASPGSTASQ-p;u|PRLRSVSSYGNIRAV-p;u|RPASVPPSPSLSRHS-p;u|GGTLFSTTPGGTRII-p;u|EARSRDATPPVSPIN-p;u|TKNGLPGSRPGSPER-p;u|LTQSAPASPTNKGVH-p;u|DTSSLTQSAPASPTN-p;u|GISSMSSSPSRETVG-p;u…
KINASE-PSP_ATM	n=230|MCM3_S535|FANCI_S972|NBN_S343|PRKDC_T2609|NKX3-1_T166|TP53BP1_S29|SP1_S56|UBR5_S191|KHSRP_S670|RANBP9_S603|TOPBP1_T1062|NFAT5_S1197|XRCC6_S27|DCLRE1C_S503|RRM2B_S72|TAOK3_S359|USP28_S495|CROCC_S922|_S161|FANCD2_S222|FBXW7_S26|RFWD3_S63|ZNF148_S202|UIMC1_S205|PNKP_S126|RASSF1_S135|E2F1_S31|NKX3-1_T134|CHEK2_S33|SLX4_S1631|FAM175A_S406|NFAT5_S1247|DCLRE1C_S516|POLL_T204|PTEN_T398|XPA_S196|CRE…	229	11.4	13.5	11.8	12.7	13.1	13.5	13.1	9.6	12.7	10.9	12.7	12.7	12.7	12.2	11.8	12.7	12.7	10.5	13.1	13.5	13.1	11.8	12.7	12.2	13.5	13.1	10.9	11.4	10	13.1	11.8	12.2	11.4	12.7	13.1	SGLHRTYSQDCSFKN-p;u|EQKFRMLSQDAPTVK-p;u|TTPGPSLSQGVSVDE-p;u|QECKRNLSDIDQSFN-p;u|EETRTPESQPDTPPG-p;u|QVNYNDGSQEDRDWQ-p;u|DERVKEPSQDTVATE-p;u|MILIQDGSQNTNVDK-p;u|MFVETQASQGTLQTR-p;u|GTGEEPGSQGLNGEA-p;u|TIAESEDSQESVDSV-p;u|KLFDVCGSQDFESDL-p;u|SLAFEEGSQSTTISS-p;u|KSPPREGSQGELTPA-p;u|ESERGSGSQSSVPSV-p;u|QEENLEASGDYKYSG-p;u|KQKFFAGSQEPMATF-p;u|LSDTDSHSQDLGSPE-p;u|LQNRNYPSQEELIKV-p;u|SEKAVLTSQKSSEYP-p;u…	QAATSESSQSEASVR-p;u|SLAFEEGSQSTTISS-p;u|QVNYNDGSQEDRDWQ-p;u|STSTESSSQDVESTF-p;u|QECKRNLSDIDQSFN-p;u|TTPGPSLSQGVSVDE-p;u|KQKFFAGSQEPMATF-p;u|SGLHRTYSQDCSFKN-p;u|ESERGSGSQSSVPSV-p;u|MFVETQASQGTLQTR-p;u|SEKAVLTSQKSSEYP-p;u|VAGQIRATQQQHDFT-p;u|EETRTPESQPDTPPG-p;u|VPESSKISQENEIGK-p;u|ISQEEGSSQGEDSVS-p;u|LSDTDSHSQDLGSPE-p;u|VGVLCTDSQGLNLGC-p;u|TIAESEDSQESVDSV-p;u|KLFDVCGSQDFESDL-p;u|DEPPMEASQSHLRNS-p;u…	QSPGGFGSPAPSQAE-p;u|SEKAVLTSQKSSEYP-p;u|MILIQDGSQNTNVDK-p;u|EFEELTMSQKNGGNV-p;u|VAGQIRATQQQHDFT-p;u|ASGDYKYSGRDSLIF-p;u|VGVLCTDSQGLNLGC-p;u|QEENLEASGDYKYSG-p;u|DEPPMEASQSHLRNS-p;u|LQNRNYPSQEELIKV-p;u|LSDTDSHSQDLGSPE-p;u|TGGGGQESQPSPLAL-p;u|SLAFEEGSQSTTISS-p;u|GTGEEPGSQGLNGEA-p;u|ISQEEGSSQGEDSVS-p;u|MFVETQASQGTLQTR-p;u|TTPGPSLSQGVSVDE-p;u|KSPPREGSQGELTPA-p;u|EETRTPESQPDTPPG-p;u|TIAESEDSQESVDSV-p;u…	SEKAVLTSQKSSEYP-p;u|LQNRNYPSQEELIKV-p;u|SGLHRTYSQDCSFKN-p;u|EFEELTMSQKNGGNV-p;u|MILIQDGSQNTNVDK-p;u|QAATSESSQSEASVR-p;u|VAGQIRATQQQHDFT-p;u|TLSEEASSQATLPNQ-p;u|KQKFFAGSQEPMATF-p;u|MFVETQASQGTLQTR-p;u|LSDTDSHSQDLGSPE-p;u|SSTVAGGSQSPKLFS-p;u|TIAESEDSQESVDSV-p;u|TTPGPSLSQGVSVDE-p;u|VPESSKISQENEIGK-p;u|EQKFRMLSQDAPTVK-p;u|VGVLCTDSQGLNLGC-p;u|KSPPREGSQGELTPA-p;u|QECKRNLSDIDQSFN-p;u|GTGEEPGSQGLNGEA-p;u…	EETRTPESQPDTPPG-p;u|ESERGSGSQSSVPSV-p;u|MILIQDGSQNTNVDK-p;u|QVNYNDGSQEDRDWQ-p;u|SGLHRTYSQDCSFKN-p;u|EFEELTMSQKNGGNV-p;u|KQKFFAGSQEPMATF-p;u|TIAESEDSQESVDSV-p;u|MFVETQASQGTLQTR-p;u|SEKAVLTSQKSSEYP-p;u|SSTVAGGSQSPKLFS-p;u|GTGEEPGSQGLNGEA-p;u|QSPGGFGSPAPSQAE-p;u|KLFDVCGSQDFESDL-p;u|TTPGPSLSQGVSVDE-p;u|DEPPMEASQSHLRNS-p;u|VAGQIRATQQQHDFT-p;u|TLSEEASSQATLPNQ-p;u|VPESSKISQENEIGK-p;u|EQKFRMLSQDAPTVK-p;u…	SLAFEEGSQSTTISS-p;u|MFVETQASQGTLQTR-p;u|SGLHRTYSQDCSFKN-p;u|KQKFFAGSQEPMATF-p;u|QSPGGFGSPAPSQAE-p;u|MILIQDGSQNTNVDK-p;u|QVNYNDGSQEDRDWQ-p;u|QECKRNLSDIDQSFN-p;u|QAATSESSQSEASVR-p;u|ASGDYKYSGRDSLIF-p;u|TTPGPSLSQGVSVDE-p;u|LQNRNYPSQEELIKV-p;u|ESERGSGSQSSVPSV-p;u|EQKFRMLSQDAPTVK-p;u|STSTESSSQDVESTF-p;u|DEPPMEASQSHLRNS-p;u|TIAESEDSQESVDSV-p;u|VAGQIRATQQQHDFT-p;u|KLFDVCGSQDFESDL-p;u|EETRTPESQPDTPPG-p;u…	MILIQDGSQNTNVDK-p;u|SGLHRTYSQDCSFKN-p;u|KQKFFAGSQEPMATF-p;u|TTPGPSLSQGVSVDE-p;u|SLAFEEGSQSTTISS-p;u|GTGEEPGSQGLNGEA-p;u|QAATSESSQSEASVR-p;u|VAGQIRATQQQHDFT-p;u|QVNYNDGSQEDRDWQ-p;u|KSPPREGSQGELTPA-p;u|ASGDYKYSGRDSLIF-p;u|EFEELTMSQKNGGNV-p;u|MFVETQASQGTLQTR-p;u|QECKRNLSDIDQSFN-p;u|ISQEEGSSQGEDSVS-p;u|DEPPMEASQSHLRNS-p;u|TIAESEDSQESVDSV-p;u|ESERGSGSQSSVPSV-p;u|SEKAVLTSQKSSEYP-p;u|VPESSKISQENEIGK-p;u…	MILIQDGSQNTNVDK-p;u|SGLHRTYSQDCSFKN-p;u|QECKRNLSDIDQSFN-p;u|QAATSESSQSEASVR-p;u|TTPGPSLSQGVSVDE-p;u|ESERGSGSQSSVPSV-p;u|QVNYNDGSQEDRDWQ-p;u|KLFDVCGSQDFESDL-p;u|ISQEEGSSQGEDSVS-p;u|MFVETQASQGTLQTR-p;u|EQKFRMLSQDAPTVK-p;u|SLAFEEGSQSTTISS-p;u|KSPPREGSQGELTPA-p;u|DEPPMEASQSHLRNS-p;u|VGVLCTDSQGLNLGC-p;u|SEKAVLTSQKSSEYP-p;u|EETRTPESQPDTPPG-p;u|QEENLEASGDYKYSG-p;u|LQNRNYPSQEELIKV-p;u|TIAESEDSQESVDSV-p;u…	QSPGGFGSPAPSQAE-p;u|SGLHRTYSQDCSFKN-p;u|VAGQIRATQQQHDFT-p;u|TIAESEDSQESVDSV-p;u|KQKFFAGSQEPMATF-p;u|MFVETQASQGTLQTR-p;u|EFEELTMSQKNGGNV-p;u|KSPPREGSQGELTPA-p;u|LSDTDSHSQDLGSPE-p;u|MILIQDGSQNTNVDK-p;u|SSTVAGGSQSPKLFS-p;u|TGGGGQESQPSPLAL-p;u|EETRTPESQPDTPPG-p;u|ISQEEGSSQGEDSVS-p;u|TLSEEASSQATLPNQ-p;u|QECKRNLSDIDQSFN-p;u|SLAFEEGSQSTTISS-p;u|GTGEEPGSQGLNGEA-p;u|ESERGSGSQSSVPSV-p;u|LQNRNYPSQEELIKV-p;u…	ASGDYKYSGRDSLIF-p;u|TTPGPSLSQGVSVDE-p;u|MILIQDGSQNTNVDK-p;u|EQKFRMLSQDAPTVK-p;u|QAATSESSQSEASVR-p;u|MFVETQASQGTLQTR-p;u|SLAFEEGSQSTTISS-p;u|LQNRNYPSQEELIKV-p;u|QECKRNLSDIDQSFN-p;u|KLFDVCGSQDFESDL-p;u|VPESSKISQENEIGK-p;u|KSPPREGSQGELTPA-p;u|ESERGSGSQSSVPSV-p;u|SEKAVLTSQKSSEYP-p;u|EFEELTMSQKNGGNV-p;u|DEPPMEASQSHLRNS-p;u|QVNYNDGSQEDRDWQ-p;u|ISQEEGSSQGEDSVS-p;u|VGVLCTDSQGLNLGC-p;u|EETRTPESQPDTPPG-p;u…	QSPGGFGSPAPSQAE-p;u|EETRTPESQPDTPPG-p;u|EFEELTMSQKNGGNV-p;u|SLAFEEGSQSTTISS-p;u|QVNYNDGSQEDRDWQ-p;u|VAGQIRATQQQHDFT-p;u|MILIQDGSQNTNVDK-p;u|DEPPMEASQSHLRNS-p;u|SSTVAGGSQSPKLFS-p;u|MFVETQASQGTLQTR-p;u|LSDTDSHSQDLGSPE-p;u|GTGEEPGSQGLNGEA-p;u|TTPGPSLSQGVSVDE-p;u|TIAESEDSQESVDSV-p;u|ESERGSGSQSSVPSV-p;u|KLFDVCGSQDFESDL-p;u|TGGGGQESQPSPLAL-p;u|QECKRNLSDIDQSFN-p;u|VGVLCTDSQGLNLGC-p;u|VPESSKISQENEIGK-p;u…	EQKFRMLSQDAPTVK-p;u|SGLHRTYSQDCSFKN-p;u|VAGQIRATQQQHDFT-p;u|LSDTDSHSQDLGSPE-p;u|QSPGGFGSPAPSQAE-p;u|KQKFFAGSQEPMATF-p;u|TGGGGQESQPSPLAL-p;u|ESERGSGSQSSVPSV-p;u|SSTVAGGSQSPKLFS-p;u|KLFDVCGSQDFESDL-p;u|ISQEEGSSQGEDSVS-p;u|QECKRNLSDIDQSFN-p;u|MFVETQASQGTLQTR-p;u|TTPGPSLSQGVSVDE-p;u|EFEELTMSQKNGGNV-p;u|DEPPMEASQSHLRNS-p;u|VGVLCTDSQGLNLGC-p;u|MILIQDGSQNTNVDK-p;u|KSPPREGSQGELTPA-p;u|QVNYNDGSQEDRDWQ-p;u…
KINASE-PSP_DYRK1A	n=35|MAPT_S202|MAPT_S199|AMPH_T310|MAPT_T217|RCAN1_T247|POLR2A_S1616|GLI1_S408|DYRK1A_S529|MAPT_S396|MAPT_S404|NFATC1_S261|AMPH_S293|SF3B1_T273|NFATC1_S409|MAPT_T212|CCNL2_S338|LIN52_S28|POLR2A_S1619|SPRY2_T75|CCNL2_S369|NFATC1_S403|TP53_S15|CCND1_T286|AMPH_S295|FOXO1_S329|MAPT_T205|SF3B1_T434|CDKL5_S308|MAPT_S422|CCNL2_S330|SNCA_S87|DNM1_S857|RCAN1_S167|NFATC1_S278|AMPH_T312	35	40	34.3	37.1	40	34.3	34.3	34.3	40	34.3	37.1	31.4	34.3	40	34.3	31.4	40	34.3	40	34.3	37.1	34.3	31.4	34.3	34.3	34.3	34.3	37.1	40	40	34.3	31.4	34.3	40	34.3	34.3	STISGRLSPIMTEQD-p;u|PAPKLVESPKEGKGS-p;u|PARKLTATPTPLGGM-p;u|AKKAKADSPVNGLPK-p;u|FLISPPASPPVGWKQ-p;u|LDGTSGFSPAPKLVE-p;u|FEKLDRASPDLWPEQ-p;u|RLLDRSPSRSAKRKP-p;u|TPGSRSRTPSLPTPP-p;u|GAEIVYKSPVVSGDT-p;u|ARSSRPASPCNKRKY-p;u|SGYSSPGSPGTPGSR-p;u|PVVSGDTSPRHLSNV-p;u|GDRSGYSSPGSPGTP-p;u	FLISPPASPPVGWKQ-p;u|FEKLDRASPDLWPEQ-p;u|PARKLTATPTPLGGM-p;u|LDGTSGFSPAPKLVE-p;u|GDRSGYSSPGSPGTP-p;u|STISGRLSPIMTEQD-p;u|TPGSRSRTPSLPTPP-p;u|AKKAKADSPVNGLPK-p;u|SGYSSPGSPGTPGSR-p;u|ARSSRPASPCNKRKY-p;u|GAEIVYKSPVVSGDT-p;u|PVVSGDTSPRHLSNV-p;u	PARKLTATPTPLGGM-p;u|LDGTSGFSPAPKLVE-p;u|PAPKLVESPKEGKGS-p;u|AKKAKADSPVNGLPK-p;u|FEKLDRASPDLWPEQ-p;u|TPGSRSRTPSLPTPP-p;u|FLISPPASPPVGWKQ-p;u|STISGRLSPIMTEQD-p;u|GAEIVYKSPVVSGDT-p;u|ARSSRPASPCNKRKY-p;u|GDRSGYSSPGSPGTP-p;u|SGYSSPGSPGTPGSR-p;u|PVVSGDTSPRHLSNV-p;u	GDRSGYSSPGSPGTP-p;u|PVVSGDTSPRHLSNV-p;u|GAEIVYKSPVVSGDT-p;u|SGYSSPGSPGTPGSR-p;u|TPGSRSRTPSLPTPP-p;u|PAPKLVESPKEGKGS-p;u|PARKLTATPTPLGGM-p;u|ARSSRPASPCNKRKY-p;u|FLISPPASPPVGWKQ-p;u|FEKLDRASPDLWPEQ-p;u|LDGTSGFSPAPKLVE-p;u|AKKAKADSPVNGLPK-p;u|STISGRLSPIMTEQD-p;u|RLLDRSPSRSAKRKP-p;u	STISGRLSPIMTEQD-p;u|FLISPPASPPVGWKQ-p;u|FEKLDRASPDLWPEQ-p;u|LDGTSGFSPAPKLVE-p;u|PARKLTATPTPLGGM-p;u|AKKAKADSPVNGLPK-p;u|TPGSRSRTPSLPTPP-p;u|SGYSSPGSPGTPGSR-p;u|GAEIVYKSPVVSGDT-p;u|ARSSRPASPCNKRKY-p;u|RLLDRSPSRSAKRKP-p;u|PVVSGDTSPRHLSNV-p;u	FEKLDRASPDLWPEQ-p;u|PARKLTATPTPLGGM-p;u|FLISPPASPPVGWKQ-p;u|AKKAKADSPVNGLPK-p;u|LDGTSGFSPAPKLVE-p;u|STISGRLSPIMTEQD-p;u|TPGSRSRTPSLPTPP-p;u|GAEIVYKSPVVSGDT-p;u|GDRSGYSSPGSPGTP-p;u|SGYSSPGSPGTPGSR-p;u|PVVSGDTSPRHLSNV-p;u|ARSSRPASPCNKRKY-p;u	TPGSRSRTPSLPTPP-p;u|PVVSGDTSPRHLSNV-p;u|GDRSGYSSPGSPGTP-p;u|SGYSSPGSPGTPGSR-p;u|FLISPPASPPVGWKQ-p;u|PAPKLVESPKEGKGS-p;u|LDGTSGFSPAPKLVE-p;u|FEKLDRASPDLWPEQ-p;u|PARKLTATPTPLGGM-p;u|AKKAKADSPVNGLPK-p;u|STISGRLSPIMTEQD-p;u|ARSSRPASPCNKRKY-p;u	PAPKLVESPKEGKGS-p;u|FLISPPASPPVGWKQ-p;u|STISGRLSPIMTEQD-p;u|LDGTSGFSPAPKLVE-p;u|PARKLTATPTPLGGM-p;u|FEKLDRASPDLWPEQ-p;u|TPGSRSRTPSLPTPP-p;u|AKKAKADSPVNGLPK-p;u|GAEIVYKSPVVSGDT-p;u|ARSSRPASPCNKRKY-p;u|SGYSSPGSPGTPGSR-p;u|PVVSGDTSPRHLSNV-p;u|RLLDRSPSRSAKRKP-p;u|GDRSGYSSPGSPGTP-p;u	STISGRLSPIMTEQD-p;u|PARKLTATPTPLGGM-p;u|FLISPPASPPVGWKQ-p;u|AKKAKADSPVNGLPK-p;u|LDGTSGFSPAPKLVE-p;u|FEKLDRASPDLWPEQ-p;u|TPGSRSRTPSLPTPP-p;u|GAEIVYKSPVVSGDT-p;u|ARSSRPASPCNKRKY-p;u|SGYSSPGSPGTPGSR-p;u|PVVSGDTSPRHLSNV-p;u|RLLDRSPSRSAKRKP-p;u	PAPKLVESPKEGKGS-p;u|FEKLDRASPDLWPEQ-p;u|FLISPPASPPVGWKQ-p;u|GAEIVYKSPVVSGDT-p;u|PARKLTATPTPLGGM-p;u|LDGTSGFSPAPKLVE-p;u|AKKAKADSPVNGLPK-p;u|STISGRLSPIMTEQD-p;u|TPGSRSRTPSLPTPP-p;u|ARSSRPASPCNKRKY-p;u|SGYSSPGSPGTPGSR-p;u|PVVSGDTSPRHLSNV-p;u|GDRSGYSSPGSPGTP-p;u	AKKAKADSPVNGLPK-p;u|LDGTSGFSPAPKLVE-p;u|PAPKLVESPKEGKGS-p;u|STISGRLSPIMTEQD-p;u|FLISPPASPPVGWKQ-p;u|ARSSRPASPCNKRKY-p;u|PARKLTATPTPLGGM-p;u|FEKLDRASPDLWPEQ-p;u|SGYSSPGSPGTPGSR-p;u|PVVSGDTSPRHLSNV-p;u|RLLDRSPSRSAKRKP-p;u	STISGRLSPIMTEQD-p;u|LDGTSGFSPAPKLVE-p;u|FEKLDRASPDLWPEQ-p;u|FLISPPASPPVGWKQ-p;u|PARKLTATPTPLGGM-p;u|AKKAKADSPVNGLPK-p;u|TPGSRSRTPSLPTPP-p;u|RLLDRSPSRSAKRKP-p;u|GAEIVYKSPVVSGDT-p;u|SGYSSPGSPGTPGSR-p;u|ARSSRPASPCNKRKY-p;u|PVVSGDTSPRHLSNV-p;u
KINASE-PSP_ASK1/MAP3K5	n=23|DAXX_S176|MAP2K3_S218|MAPK8_T183|MAP2K6_S207|MAP3K5_T838|STRAP_T175|MAPK14_T180|STRAP_S179|ZNF622_T318|DAXX_S184|MAPRE1_T206|MAPK8_Y185|MAPRE1_T154|MAP3K5_T842|ZNF622_S314|MAPRE1_S40|PDPK1_S398|MAP3K5_T813|CDKN1A_S98|MAP2K4_T261|PDPK1_S394|MAPK14_Y182|MAP3K5_S966	23	17.4	21.7	21.7	21.7	21.7	21.7	21.7	17.4	21.7	21.7	17.4	21.7	21.7	21.7	21.7	21.7	21.7	21.7	21.7	21.7	21.7	21.7	21.7	21.7	21.7	21.7	21.7	17.4	21.7	21.7	21.7	21.7	17.4	21.7	21.7	AGTSFMMTPYVVTRY-p;u|RHTDDEMTGYVATRW-p;u|TSFMMTPYVVTRYYR-p;u|TDDEMTGYVATRWYR-p;u	TSFMMTPYVVTRYYR-p;u|AGTSFMMTPYVVTRY-p;u|RHTDDEMTGYVATRW-p;u|TDDEMTGYVATRWYR-p;u|ISGYLVDSVAKTMDA-p;u	TDDEMTGYVATRWYR-p;u|RHTDDEMTGYVATRW-p;u|ISGYLVDSVAKTMDA-p;u|AGTSFMMTPYVVTRY-p;u|TSFMMTPYVVTRYYR-p;u	TDDEMTGYVATRWYR-p;u|RHTDDEMTGYVATRW-p;u|AGTSFMMTPYVVTRY-p;u|ISGYLVDSVAKTMDA-p;u|TSFMMTPYVVTRYYR-p;u	TDDEMTGYVATRWYR-p;u|RHTDDEMTGYVATRW-p;u|AGTSFMMTPYVVTRY-p;u|ISGYLVDSVAKTMDA-p;u|TSFMMTPYVVTRYYR-p;u	TDDEMTGYVATRWYR-p;u|RHTDDEMTGYVATRW-p;u|TSFMMTPYVVTRYYR-p;u|AGTSFMMTPYVVTRY-p;u|ISGYLVDSVAKTMDA-p;u	RHTDDEMTGYVATRW-p;u|AGTSFMMTPYVVTRY-p;u|TDDEMTGYVATRWYR-p;u|TSFMMTPYVVTRYYR-p;u|ISGYLVDSVAKTMDA-p;u	AGTSFMMTPYVVTRY-p;u|RHTDDEMTGYVATRW-p;u|TSFMMTPYVVTRYYR-p;u|TDDEMTGYVATRWYR-p;u	ISGYLVDSVAKTMDA-p;u|TDDEMTGYVATRWYR-p;u|RHTDDEMTGYVATRW-p;u|TSFMMTPYVVTRYYR-p;u|AGTSFMMTPYVVTRY-p;u	RHTDDEMTGYVATRW-p;u|TDDEMTGYVATRWYR-p;u|ISGYLVDSVAKTMDA-p;u|AGTSFMMTPYVVTRY-p;u|TSFMMTPYVVTRYYR-p;u	AGTSFMMTPYVVTRY-p;u|RHTDDEMTGYVATRW-p;u|TSFMMTPYVVTRYYR-p;u|TDDEMTGYVATRWYR-p;u	RHTDDEMTGYVATRW-p;u|TDDEMTGYVATRWYR-p;u|AGTSFMMTPYVVTRY-p;u|TSFMMTPYVVTRYYR-p;u|ISGYLVDSVAKTMDA-p;u
KINASE-PSP_NDR1/STK38	n=9|YAP1_S61|YAP1_S164|STK38_T444|RAB3IP_S288|KIF23_S814|KIF23_S716|YAP1_S127|STK38_S281|YAP1_S109	9	66.7	66.7	55.6	66.7	55.6	66.7	66.7	66.7	66.7	66.7	66.7	66.7	66.7	66.7	66.7	66.7	66.7	66.7	55.6	55.6	66.7	66.7	66.7	66.7	66.7	66.7	66.7	66.7	66.7	66.7	66.7	66.7	66.7	55.6	55.6	AQHLRQSSFEIPDDV-p;u|IVHVRGDSETDLEAL-p;u|KSHSRQASTDAGTAG-p;u|QLHRRSNSCSSISVA-p;u|NRRQLAFSTVGTPDY-p;u|PQHVRAHSSPASLQL-p;u	AQHLRQSSFEIPDDV-p;u|NRRQLAFSTVGTPDY-p;u|KSHSRQASTDAGTAG-p;u|IVHVRGDSETDLEAL-p;u|PQHVRAHSSPASLQL-p;u|QLHRRSNSCSSISVA-p;u	KSHSRQASTDAGTAG-p;u|PQHVRAHSSPASLQL-p;u|QLHRRSNSCSSISVA-p;u|NRRQLAFSTVGTPDY-p;u|IVHVRGDSETDLEAL-p;u	QLHRRSNSCSSISVA-p;u|AQHLRQSSFEIPDDV-p;u|KSHSRQASTDAGTAG-p;u|NRRQLAFSTVGTPDY-p;u|PQHVRAHSSPASLQL-p;u|IVHVRGDSETDLEAL-p;u	AQHLRQSSFEIPDDV-p;u|IVHVRGDSETDLEAL-p;u|KSHSRQASTDAGTAG-p;u|NRRQLAFSTVGTPDY-p;u|QLHRRSNSCSSISVA-p;u	KSHSRQASTDAGTAG-p;u|AQHLRQSSFEIPDDV-p;u|QLHRRSNSCSSISVA-p;u|IVHVRGDSETDLEAL-p;u|NRRQLAFSTVGTPDY-p;u|PQHVRAHSSPASLQL-p;u	PQHVRAHSSPASLQL-p;u|QLHRRSNSCSSISVA-p;u|KSHSRQASTDAGTAG-p;u|IVHVRGDSETDLEAL-p;u|AQHLRQSSFEIPDDV-p;u|NRRQLAFSTVGTPDY-p;u	QLHRRSNSCSSISVA-p;u|NRRQLAFSTVGTPDY-p;u|KSHSRQASTDAGTAG-p;u|PQHVRAHSSPASLQL-p;u|AQHLRQSSFEIPDDV-p;u|IVHVRGDSETDLEAL-p;u	IVHVRGDSETDLEAL-p;u|QLHRRSNSCSSISVA-p;u|KSHSRQASTDAGTAG-p;u|AQHLRQSSFEIPDDV-p;u|PQHVRAHSSPASLQL-p;u|NRRQLAFSTVGTPDY-p;u	PQHVRAHSSPASLQL-p;u|KSHSRQASTDAGTAG-p;u|QLHRRSNSCSSISVA-p;u|IVHVRGDSETDLEAL-p;u|AQHLRQSSFEIPDDV-p;u|NRRQLAFSTVGTPDY-p;u	QLHRRSNSCSSISVA-p;u|NRRQLAFSTVGTPDY-p;u|KSHSRQASTDAGTAG-p;u|PQHVRAHSSPASLQL-p;u|AQHLRQSSFEIPDDV-p;u|IVHVRGDSETDLEAL-p;u	AQHLRQSSFEIPDDV-p;u|IVHVRGDSETDLEAL-p;u|NRRQLAFSTVGTPDY-p;u|QLHRRSNSCSSISVA-p;u|PQHVRAHSSPASLQL-p;u|KSHSRQASTDAGTAG-p;u
KINASE-PSP_Chk1/CHEK1	n=184|CTR9_S1081|LAMC1_T258|DDX19A_S92|HNRNPA2B1_T159|RPL19_T56|YBX1_T80|TICRR_T1898|BAZ1A_S1320|BLM_S539|E2F3_S124|CHEK1_S296|TRIP12_S1078|TLK1_S743|CLK3_S157|EPRS_S910|SETMAR_S508|PRR5_S240|E2F6_S52|TP53_S37|TP73_S47|GTF3C1_S667|RBM26_T839|YBX3_T112|INF2_S574|TICRR_S1045|SRC_Y530|CDC25A_S76|MKI67_T1764|TFDP1_S23|ERRFI1_S302|FANCD2_S331|RALY_T160|TP53BP1_S1678|ZNF638_S375|SCAF11_S1127|SRRM2_S228…	178	32	30.3	29.8	30.3	29.2	30.3	28.1	29.2	29.8	29.8	30.9	30.9	30.3	28.7	30.3	30.3	29.8	30.3	29.2	31.5	28.1	30.3	30.9	28.7	30.3	28.1	29.8	32	28.1	28.1	30.3	28.7	32	27.5	29.2	SSSSRSRSFTLDDES-p;u|WSENKKLSLDTDARF-p;u|RMRGRLGSVDSFERS-p;u|RLLRRSRSGDVLAKN-p;u|GIMRRGESLDNLDSP-p;u|QPVSAPPSPRDISME-p;u|PISQRRPSQNAISFF-p;u|RGSSRLLSFSPEEFP-p;u|KLQLRVPSVESLFRS-p;u|RVIEDNEYTAREGAK-p;u|SGVKRSRSGEGEVSG-p;u|KTIERRYSDLTTLVA-p;u|RSLRKADTEEEFLAF-p;u|PGYTRKLSAEELERK-p;u|GLLRRKVSIIETKEK-p;u|KKKFRTPSFLKKSKK-p;u|HGMDRVGSEIERMGL-p;u|TVFQRSYSVVASEYD-p;u|LQLKRRRTEEGPTLS-p;u|MHLGRLPSRPPLPGS-p;u…	PGYTRKLSAEELERK-p;u|RVIEDNEYTAREGAK-p;u|RGITRSISNEGLTLN-p;u|GLLRRKVSIIETKEK-p;u|KTIERRYSDLTTLVA-p;u|GIMRRGESLDNLDSP-p;u|SQLSFRRSPTKSSLD-p;u|SSSSRSRSFTLDDES-p;u|EPTKRMLSFQGLAEL-p;u|RSRSRHSSISPSTLT-p;u|GPVKKTRSIGSAVDQ-p;u|LQLKRRRTEEGPTLS-p;u|LYDNRRRSAQWLDQE-p;u|PISQRRPSQNAISFF-p;u|WSENKKLSLDTDARF-p;u|ADAKRIPSIVSSPLN-p;u|QGLPVPGSPGGQKWV-p;u|REGTRVASIETGLAA-p;u|TVFQRSYSVVASEYD-p;u|MYLSPVRSPKKKGST-p;u…	RVIEDNEYTAREGAK-p;u|MYLSPVRSPKKKGST-p;u|RLLRRSRSGDVLAKN-p;u|KLQLRVPSVESLFRS-p;u|QGLPVPGSPGGQKWV-p;u|PQTPRPRSRSPSSPE-p;u|SQLSFRRSPTKSSLD-p;u|TPRPRSRSPSSPELN-p;u|HGMDRVGSEIERMGL-p;u|KTIERRYSDLTTLVA-p;u|EEEDEALSPAKGQKP-p;u|PGYTRKLSAEELERK-p;u|SGLYRSPSMPENLNR-p;u|VFIDQNLSPGKGVVS-p;u|KRKAQAVSEEEEEEE-p;u|REGTRVASIETGLAA-p;u|SLVIRSPSLLQSGAK-p;u|QPVSAPPSPRDISME-p;u|RGSSRLLSFSPEEFP-p;u|RMRGRLGSVDSFERS-p;u…	RMRGRLGSVDSFERS-p;u|KKKFRTPSFLKKSKK-p;u|SSSSRSRSFTLDDES-p;u|PGYTRKLSAEELERK-p;u|RGSSRLLSFSPEEFP-p;u|RMKGISRSLESVLSL-p;u|ASSKRMLSPANSLDI-p;u|QPVSAPPSPRDISME-p;u|MYLSPVRSPKKKGST-p;u|MHLGRLPSRPPLPGS-p;u|SGLYRSPSMPENLNR-p;u|RVIEDNEYTAREGAK-p;u|PDCRRTISAPVVRPK-p;u|TPRPRSRSPSSPELN-p;u|SGVKRSRSGEGEVSG-p;u|PQTPRPRSRSPSSPE-p;u|RSRSRHSSISPSTLT-p;u|EKLDQPVSAPPSPRD-p;u|REGTRVASIETGLAA-p;u|RFTYRSDSFENPVLQ-p;u…	GIMRRGESLDNLDSP-p;u|PGYTRKLSAEELERK-p;u|SGVKRSRSGEGEVSG-p;u|MYLSPVRSPKKKGST-p;u|RSRSRHSSISPSTLT-p;u|RVIEDNEYTAREGAK-p;u|REGTRVASIETGLAA-p;u|RSLRKADTEEEFLAF-p;u|SLVIRSPSLLQSGAK-p;u|PISQRRPSQNAISFF-p;u|SQLSFRRSPTKSSLD-p;u|RLLRRSRSGDVLAKN-p;u|QPVSAPPSPRDISME-p;u|WSENKKLSLDTDARF-p;u|GLLRRKVSIIETKEK-p;u|RMRGRLGSVDSFERS-p;u|HHCKRYRSPEPDPYL-p;u|PQTPRPRSRSPSSPE-p;u|TPRPRSRSPSSPELN-p;u|KLQLRVPSVESLFRS-p;u…	MYLSPVRSPKKKGST-p;u|GIMRRGESLDNLDSP-p;u|RMRGRLGSVDSFERS-p;u|RLLRRSRSGDVLAKN-p;u|RVIEDNEYTAREGAK-p;u|EGDNGMDSDMEEEAD-p;u|WSENKKLSLDTDARF-p;u|PGYTRKLSAEELERK-p;u|SQLSFRRSPTKSSLD-p;u|HGMDRVGSEIERMGL-p;u|SGVKRSRSGEGEVSG-p;u|QPVSAPPSPRDISME-p;u|ADAKRIPSIVSSPLN-p;u|DSLSAQLSQLQKQLA-p;u|TVFQRSYSVVASEYD-p;u|RSRSRHSSISPSTLT-p;u|LYDNRRRSAQWLDQE-p;u|LQLKRRRTEEGPTLS-p;u|PISQRRPSQNAISFF-p;u|REGTRVASIETGLAA-p;u…	HGMDRVGSEIERMGL-p;u|GLLRRKVSIIETKEK-p;u|GLLHRAFSVFLFNTE-p;u|MYLSPVRSPKKKGST-p;u|LSDYRRLSESQLSFR-p;u|PISQRRPSQNAISFF-p;u|TVFQRSYSVVASEYD-p;u|REGTRVASIETGLAA-p;u|AVGDEMGTVRVASTM-p;u|RGITRSISNEGLTLN-p;u|KRKAQAVSEEEEEEE-p;u|VNKVRRVSFADPIYQ-p;u|NVKSKIGSTENLKHQ-p;u|GPVKKTRSIGSAVDQ-p;u|SQLSFRRSPTKSSLD-p;u|ITSEEERSPAKRGRK-p;u|TPRPRSRSPSSPELN-p;u|KLQLRVPSVESLFRS-p;u|PQTPRPRSRSPSSPE-p;u|SGVKRSRSGEGEVSG-p;u…	HGMDRVGSEIERMGL-p;u|RVIEDNEYTAREGAK-p;u|KRGFGFVTFDDHDPV-p;u|GIMRRGESLDNLDSP-p;u|RLLRRSRSGDVLAKN-p;u|PGYTRKLSAEELERK-p;u|REGTRVASIETGLAA-p;u|SGVKRSRSGEGEVSG-p;u|TVFQRSYSVVASEYD-p;u|PISQRRPSQNAISFF-p;u|RFTYRSDSFENPVLQ-p;u|GLLRRKVSIIETKEK-p;u|LSDYRRLSESQLSFR-p;u|RMRGRLGSVDSFERS-p;u|RGSSRLLSFSPEEFP-p;u|MYLSPVRSPKKKGST-p;u|LQLKRRRTEEGPTLS-p;u|VNKVRRVSFADPIYQ-p;u|ADAKRIPSIVSSPLN-p;u|KTIERRYSDLTTLVA-p;u…	PGYTRKLSAEELERK-p;u|QGLPVPGSPGGQKWV-p;u|PQTPRPRSRSPSSPE-p;u|TPRPRSRSPSSPELN-p;u|KLQLRVPSVESLFRS-p;u|GIMRRGESLDNLDSP-p;u|SGVKRSRSGEGEVSG-p;u|EGDNGMDSDMEEEAD-p;u|RLLRRSRSGDVLAKN-p;u|KRKAQAVSEEEEEEE-p;u|VFIDQNLSPGKGVVS-p;u|RMKGISRSLESVLSL-p;u|RSRSRHSSISPSTLT-p;u|GPVKKTRSIGSAVDQ-p;u|PDCRRTISAPVVRPK-p;u|RGITRSISNEGLTLN-p;u|LYDNRRRSAQWLDQE-p;u|DSLSAQLSQLQKQLA-p;u|SLVIRSPSLLQSGAK-p;u|REGTRVASIETGLAA-p;u…	MYLSPVRSPKKKGST-p;u|HGMDRVGSEIERMGL-p;u|RLLRRSRSGDVLAKN-p;u|RVIEDNEYTAREGAK-p;u|PGYTRKLSAEELERK-p;u|GIMRRGESLDNLDSP-p;u|GLLHRAFSVFLFNTE-p;u|TVFQRSYSVVASEYD-p;u|AVGDEMGTVRVASTM-p;u|KRGFGFVTFDDHDPV-p;u|GLLRRKVSIIETKEK-p;u|SQLSFRRSPTKSSLD-p;u|LQLKRRRTEEGPTLS-p;u|VNKVRRVSFADPIYQ-p;u|WSENKKLSLDTDARF-p;u|REGTRVASIETGLAA-p;u|GFSKHIQSNLDFSPV-p;u|SGVKRSRSGEGEVSG-p;u|LSDYRRLSESQLSFR-p;u|QPVSAPPSPRDISME-p;u…	SGVKRSRSGEGEVSG-p;u|HHCKRYRSPEPDPYL-p;u|TARREDPSFERYPKN-p;u|PDCRRTISAPVVRPK-p;u|HGMDRVGSEIERMGL-p;u|PGYTRKLSAEELERK-p;u|KTIERRYSDLTTLVA-p;u|MYLSPVRSPKKKGST-p;u|PQTPRPRSRSPSSPE-p;u|SQLSFRRSPTKSSLD-p;u|TPRPRSRSPSSPELN-p;u|SLVIRSPSLLQSGAK-p;u|WSENKKLSLDTDARF-p;u|QPVSAPPSPRDISME-p;u|RSRSRHSSISPSTLT-p;u|RLLRRSRSGDVLAKN-p;u|LYDNRRRSAQWLDQE-p;u|MHLGRLPSRPPLPGS-p;u|RFTYRSDSFENPVLQ-p;u|REGTRVASIETGLAA-p;u…	KKKFRTPSFLKKSKK-p;u|GIMRRGESLDNLDSP-p;u|RMRGRLGSVDSFERS-p;u|SQLSFRRSPTKSSLD-p;u|SSSSRSRSFTLDDES-p;u|EKLDQPVSAPPSPRD-p;u|SGLYRSPSMPENLNR-p;u|PGYTRKLSAEELERK-p;u|RGSSRLLSFSPEEFP-p;u|GFSKHIQSNLDFSPV-p;u|LSDYRRLSESQLSFR-p;u|MYLSPVRSPKKKGST-p;u|LQLKRRRTEEGPTLS-p;u|QPVSAPPSPRDISME-p;u|WSENKKLSLDTDARF-p;u|MHLGRLPSRPPLPGS-p;u|RSRSRHSSISPSTLT-p;u|TVFQRSYSVVASEYD-p;u|EEEDEALSPAKGQKP-p;u|GPVKKTRSIGSAVDQ-p;u…
KINASE-PSP_LATS1	n=14|INCENP_S894|CDC26_T7|LATS1_S674|LATS1_S909|YAP1_S61|RAF1_S259|KIF23_S814|YAP1_S109|KIF23_S716|YAP1_S127|LATS1_S1049|YAP1_S127|YAP1_S164|YAP1_S381	13	46.2	46.2	38.5	46.2	38.5	46.2	46.2	46.2	46.2	46.2	46.2	46.2	46.2	46.2	46.2	46.2	46.2	46.2	38.5	38.5	46.2	46.2	46.2	46.2	46.2	46.2	46.2	46.2	46.2	46.2	46.2	46.2	46.2	38.5	38.5	AQHLRQSSFEIPDDV-p;u|IVHVRGDSETDLEAL-p;u|KSHSRQASTDAGTAG-p;u|QLHRRSNSCSSISVA-p;u|PQHVRAHSSPASLQL-p;u|SQRQRSTSTPNVHMV-p;u	AQHLRQSSFEIPDDV-p;u|KSHSRQASTDAGTAG-p;u|IVHVRGDSETDLEAL-p;u|PQHVRAHSSPASLQL-p;u|QLHRRSNSCSSISVA-p;u|SQRQRSTSTPNVHMV-p;u	KSHSRQASTDAGTAG-p;u|SQRQRSTSTPNVHMV-p;u|PQHVRAHSSPASLQL-p;u|QLHRRSNSCSSISVA-p;u|IVHVRGDSETDLEAL-p;u	QLHRRSNSCSSISVA-p;u|AQHLRQSSFEIPDDV-p;u|KSHSRQASTDAGTAG-p;u|SQRQRSTSTPNVHMV-p;u|PQHVRAHSSPASLQL-p;u|IVHVRGDSETDLEAL-p;u	AQHLRQSSFEIPDDV-p;u|IVHVRGDSETDLEAL-p;u|KSHSRQASTDAGTAG-p;u|SQRQRSTSTPNVHMV-p;u|QLHRRSNSCSSISVA-p;u	KSHSRQASTDAGTAG-p;u|AQHLRQSSFEIPDDV-p;u|QLHRRSNSCSSISVA-p;u|IVHVRGDSETDLEAL-p;u|PQHVRAHSSPASLQL-p;u|SQRQRSTSTPNVHMV-p;u	SQRQRSTSTPNVHMV-p;u|PQHVRAHSSPASLQL-p;u|QLHRRSNSCSSISVA-p;u|KSHSRQASTDAGTAG-p;u|IVHVRGDSETDLEAL-p;u|AQHLRQSSFEIPDDV-p;u	QLHRRSNSCSSISVA-p;u|KSHSRQASTDAGTAG-p;u|PQHVRAHSSPASLQL-p;u|AQHLRQSSFEIPDDV-p;u|IVHVRGDSETDLEAL-p;u|SQRQRSTSTPNVHMV-p;u	IVHVRGDSETDLEAL-p;u|QLHRRSNSCSSISVA-p;u|KSHSRQASTDAGTAG-p;u|AQHLRQSSFEIPDDV-p;u|SQRQRSTSTPNVHMV-p;u|PQHVRAHSSPASLQL-p;u	PQHVRAHSSPASLQL-p;u|KSHSRQASTDAGTAG-p;u|QLHRRSNSCSSISVA-p;u|SQRQRSTSTPNVHMV-p;u|IVHVRGDSETDLEAL-p;u|AQHLRQSSFEIPDDV-p;u	QLHRRSNSCSSISVA-p;u|SQRQRSTSTPNVHMV-p;u|KSHSRQASTDAGTAG-p;u|PQHVRAHSSPASLQL-p;u|AQHLRQSSFEIPDDV-p;u|IVHVRGDSETDLEAL-p;u	AQHLRQSSFEIPDDV-p;u|IVHVRGDSETDLEAL-p;u|QLHRRSNSCSSISVA-p;u|PQHVRAHSSPASLQL-p;u|KSHSRQASTDAGTAG-p;u|SQRQRSTSTPNVHMV-p;u
KINASE-PSP_ULK1	n=27|CDC37_S339|RPTOR_S855|RPTOR_S859|ATG9A_S761|FBP1_S88|SMCR8_S400|TMEM173_S366|SEC23A_S207|ATG13_S355|FBP1_S63|SMCR8_T666|PFKM_S74|ATG9A_S14|PFKM_S762|ENO1_S115|RPTOR_S792|HK1_S364|SEC16A_S846|ENO1_S282|SMCR8_S562|SEC23A_T405|ATG4B_S316|SDCBP_S6|HK1_S124|DENND3_S472|SMCR8_S492|DENND3_S490	27	25.9	18.5	22.2	22.2	14.8	18.5	22.2	22.2	18.5	18.5	22.2	14.8	22.2	22.2	25.9	22.2	18.5	18.5	14.8	18.5	22.2	25.9	14.8	22.2	18.5	22.2	18.5	25.9	18.5	22.2	25.9	22.2	25.9	14.8	14.8	QSIPRSASYPCAAPR-p;u|THRRMVVSMPNLQDI-p;u|SKSDSQASLTVPLSP-p;u|EYQRLEASYSDSPPG-p;u|DTSSLTQSAPASPTN-p;u|PSQDRPPSSSLEECP-p;u|__MSLYPSLEDLKVD-p;u	QSIPRSASYPCAAPR-p;u|DTSSLTQSAPASPTN-p;u|EYQRLEASYSDSPPG-p;u|PSQDRPPSSSLEECP-p;u|__MSLYPSLEDLKVD-p;u	THRRMVVSMPNLQDI-p;u|DTSSLTQSAPASPTN-p;u|PSQDRPPSSSLEECP-p;u|QSIPRSASYPCAAPR-p;u|EYQRLEASYSDSPPG-p;u|__MSLYPSLEDLKVD-p;u	QSIPRSASYPCAAPR-p;u|SKSDSQASLTVPLSP-p;u|PSQDRPPSSSLEECP-p;u|DTSSLTQSAPASPTN-p;u|EYQRLEASYSDSPPG-p;u|__MSLYPSLEDLKVD-p;u	__MSLYPSLEDLKVD-p;u|PSQDRPPSSSLEECP-p;u|EYQRLEASYSDSPPG-p;u|DTSSLTQSAPASPTN-p;u	EYQRLEASYSDSPPG-p;u|QSIPRSASYPCAAPR-p;u|PSQDRPPSSSLEECP-p;u|DTSSLTQSAPASPTN-p;u|__MSLYPSLEDLKVD-p;u	QSIPRSASYPCAAPR-p;u|EYQRLEASYSDSPPG-p;u|DTSSLTQSAPASPTN-p;u|THRRMVVSMPNLQDI-p;u|PSQDRPPSSSLEECP-p;u|__MSLYPSLEDLKVD-p;u	QSIPRSASYPCAAPR-p;u|SKSDSQASLTVPLSP-p;u|EYQRLEASYSDSPPG-p;u|DTSSLTQSAPASPTN-p;u|__MSLYPSLEDLKVD-p;u|PSQDRPPSSSLEECP-p;u	DTSSLTQSAPASPTN-p;u|SKSDSQASLTVPLSP-p;u|EYQRLEASYSDSPPG-p;u|PSQDRPPSSSLEECP-p;u|__MSLYPSLEDLKVD-p;u	QSIPRSASYPCAAPR-p;u|DTSSLTQSAPASPTN-p;u|EYQRLEASYSDSPPG-p;u|__MSLYPSLEDLKVD-p;u|PSQDRPPSSSLEECP-p;u	QSIPRSASYPCAAPR-p;u|SKSDSQASLTVPLSP-p;u|THRRMVVSMPNLQDI-p;u|DTSSLTQSAPASPTN-p;u|PSQDRPPSSSLEECP-p;u|__MSLYPSLEDLKVD-p;u	__MSLYPSLEDLKVD-p;u|PSQDRPPSSSLEECP-p;u|SKSDSQASLTVPLSP-p;u|DTSSLTQSAPASPTN-p;u
KINASE-PSP_MARK2	n=24|HDAC7_S155|HDAC4_S246|PARD3_S873|MARK2_S400|ARHGEF2_S959|MAPT_S356|KIF13B_S1410|ARHGEF2_S186|RAB11FIP2_S227|FEZ1_S58|MAPT_S262|RNF41_S254|MAPT_S324|DLG4_S561|BAIAP2_S366|ARHGEF2_S885|PINK1_T313|UTRN_S1258|ARHGEF2_S172|HDAC5_S259|ARHGEF2_S143|PARD3_S144|_S234|KIF13B_S1381	24	41.7	45.8	41.7	45.8	45.8	45.8	41.7	41.7	45.8	41.7	41.7	45.8	45.8	41.7	41.7	45.8	45.8	41.7	45.8	45.8	41.7	41.7	45.8	41.7	45.8	41.7	41.7	41.7	41.7	41.7	41.7	41.7	41.7	45.8	45.8	SNKGRWESQQDVSQT-p;u|FPLRKTVSEPNLKLR-p;u|SRLSPPHSPRDFTRM-p;u|PLHVRRSSDPALIGL-p;u|KLSRRSISSPNVNRL-p;u|PVDPRRRSLPAGDAL-p;u|QKTPLSQSMSVLPTS-p;u|FPLRKTASEPNLKVR-p;u|KTLPRSSSMAAGLER-p;u|NVKSKIGSTENLKHQ-p;u	QKTPLSQSMSVLPTS-p;u|KTLPRSSSMAAGLER-p;u|SNKGRWESQQDVSQT-p;u|FPLRKTVSEPNLKLR-p;u|GSRRGRSSLSLAKSV-p;u|SRLSPPHSPRDFTRM-p;u|PVDPRRRSLPAGDAL-p;u|PLHVRRSSDPALIGL-p;u|FPLRKTASEPNLKVR-p;u|KLSRRSISSPNVNRL-p;u|NVKSKIGSTENLKHQ-p;u	FPLRKTASEPNLKVR-p;u|SNKGRWESQQDVSQT-p;u|KLSRRSISSPNVNRL-p;u|PLHVRRSSDPALIGL-p;u|SRLSPPHSPRDFTRM-p;u|PVDPRRRSLPAGDAL-p;u|QKTPLSQSMSVLPTS-p;u|FPLRKTVSEPNLKLR-p;u|KTLPRSSSMAAGLER-p;u|NVKSKIGSTENLKHQ-p;u	SRLSPPHSPRDFTRM-p;u|KLSRRSISSPNVNRL-p;u|NVKSKIGSTENLKHQ-p;u|SNKGRWESQQDVSQT-p;u|FPLRKTASEPNLKVR-p;u|FPLRKTVSEPNLKLR-p;u|PVDPRRRSLPAGDAL-p;u|GSRRGRSSLSLAKSV-p;u|PLHVRRSSDPALIGL-p;u|QKTPLSQSMSVLPTS-p;u|KTLPRSSSMAAGLER-p;u	QKTPLSQSMSVLPTS-p;u|SNKGRWESQQDVSQT-p;u|KLSRRSISSPNVNRL-p;u|FPLRKTASEPNLKVR-p;u|SRLSPPHSPRDFTRM-p;u|GSRRGRSSLSLAKSV-p;u|PLHVRRSSDPALIGL-p;u|PVDPRRRSLPAGDAL-p;u|FPLRKTVSEPNLKLR-p;u|KTLPRSSSMAAGLER-p;u|NVKSKIGSTENLKHQ-p;u	KLSRRSISSPNVNRL-p;u|SNKGRWESQQDVSQT-p;u|SRLSPPHSPRDFTRM-p;u|GSRRGRSSLSLAKSV-p;u|PLHVRRSSDPALIGL-p;u|PVDPRRRSLPAGDAL-p;u|FPLRKTASEPNLKVR-p;u|QKTPLSQSMSVLPTS-p;u|NVKSKIGSTENLKHQ-p;u|FPLRKTVSEPNLKLR-p;u|KTLPRSSSMAAGLER-p;u	PVDPRRRSLPAGDAL-p;u|SRLSPPHSPRDFTRM-p;u|NVKSKIGSTENLKHQ-p;u|PLHVRRSSDPALIGL-p;u|FPLRKTASEPNLKVR-p;u|SNKGRWESQQDVSQT-p;u|QKTPLSQSMSVLPTS-p;u|KTLPRSSSMAAGLER-p;u|FPLRKTVSEPNLKLR-p;u|KLSRRSISSPNVNRL-p;u	KLSRRSISSPNVNRL-p;u|QKTPLSQSMSVLPTS-p;u|PVDPRRRSLPAGDAL-p;u|SNKGRWESQQDVSQT-p;u|SRLSPPHSPRDFTRM-p;u|PLHVRRSSDPALIGL-p;u|FPLRKTASEPNLKVR-p;u|FPLRKTVSEPNLKLR-p;u|KTLPRSSSMAAGLER-p;u|NVKSKIGSTENLKHQ-p;u	FPLRKTASEPNLKVR-p;u|PLHVRRSSDPALIGL-p;u|SRLSPPHSPRDFTRM-p;u|FPLRKTVSEPNLKLR-p;u|KTLPRSSSMAAGLER-p;u|SNKGRWESQQDVSQT-p;u|QKTPLSQSMSVLPTS-p;u|KLSRRSISSPNVNRL-p;u|PVDPRRRSLPAGDAL-p;u|GSRRGRSSLSLAKSV-p;u|NVKSKIGSTENLKHQ-p;u	KLSRRSISSPNVNRL-p;u|FPLRKTASEPNLKVR-p;u|KTLPRSSSMAAGLER-p;u|SNKGRWESQQDVSQT-p;u|QKTPLSQSMSVLPTS-p;u|PVDPRRRSLPAGDAL-p;u|SRLSPPHSPRDFTRM-p;u|PLHVRRSSDPALIGL-p;u|FPLRKTVSEPNLKLR-p;u|NVKSKIGSTENLKHQ-p;u	QKTPLSQSMSVLPTS-p;u|KLSRRSISSPNVNRL-p;u|SNKGRWESQQDVSQT-p;u|PLHVRRSSDPALIGL-p;u|PVDPRRRSLPAGDAL-p;u|SRLSPPHSPRDFTRM-p;u|FPLRKTASEPNLKVR-p;u|FPLRKTVSEPNLKLR-p;u|KTLPRSSSMAAGLER-p;u|NVKSKIGSTENLKHQ-p;u	GSRRGRSSLSLAKSV-p;u|KTLPRSSSMAAGLER-p;u|FPLRKTVSEPNLKLR-p;u|PVDPRRRSLPAGDAL-p;u|KLSRRSISSPNVNRL-p;u|SRLSPPHSPRDFTRM-p;u|SNKGRWESQQDVSQT-p;u|FPLRKTASEPNLKVR-p;u|PLHVRRSSDPALIGL-p;u|QKTPLSQSMSVLPTS-p;u|NVKSKIGSTENLKHQ-p;u
KINASE-PSP_Akt2/AKT2	n=28|ATP7A_S1424|MAP3K5_S83|HTRA2_S212|EZR_T567|CBY1_S20|XIAP_S87|GATA6_S290|FLNC_S2233|ESR1_S167|RACGAP1_T249|HIST1H3A_S10|WIPF1_T398|EDC3_S161|ATP7A_S1466|KHSRP_S193|PIP5K1C_S555|CHUK_T23|CTNNB1_S552|ANKRD2_S99|HIST1H3A_S28|C2CD5_S197|SH3RF1_S304|ATP7A_S1463|PDK1_T346|PPIF_S31|HIST1H3A_T45|GAPDH_T237|WIPF1_S154	28	32.1	28.6	35.7	32.1	25	28.6	32.1	32.1	28.6	32.1	28.6	28.6	32.1	32.1	28.6	32.1	28.6	32.1	25	32.1	32.1	28.6	28.6	32.1	28.6	32.1	32.1	32.1	28.6	32.1	28.6	32.1	32.1	21.4	25	LGRERLGSFGSITRQ-p;u|GLPERSVSLTGAPES-p;u|QDTQRRTSMGGTQQQ-p;u|IVNYSRASINSLLSD-p;u|SFRRRHNSWSSSSRH-p;u|YSRASINSLLSDKRS-p;u|TPPRKSASLSNLHSL-p;u|RVRVRLLSGDTYEAV-p;u|ATKAARKSAPATGGV-p;u	LGRERLGSFGSITRQ-p;u|SFRRRHNSWSSSSRH-p;u|GLPERSVSLTGAPES-p;u|IVNYSRASINSLLSD-p;u|WTRSRRKTGTLQPWN-p;u|YSRASINSLLSDKRS-p;u|QDTQRRTSMGGTQQQ-p;u|ATKAARKSAPATGGV-p;u	RVRVRLLSGDTYEAV-p;u|GLPERSVSLTGAPES-p;u|QDTQRRTSMGGTQQQ-p;u|TPPRKSASLSNLHSL-p;u|SFRRRHNSWSSSSRH-p;u|WTRSRRKTGTLQPWN-p;u|IVNYSRASINSLLSD-p;u|YSRASINSLLSDKRS-p;u|ATKAARKSAPATGGV-p;u|LGRERLGSFGSITRQ-p;u	ATKAARKSAPATGGV-p;u|QDTQRRTSMGGTQQQ-p;u|TPPRKSASLSNLHSL-p;u|GLPERSVSLTGAPES-p;u|IVNYSRASINSLLSD-p;u|SFRRRHNSWSSSSRH-p;u|YSRASINSLLSDKRS-p;u|RVRVRLLSGDTYEAV-p;u|LGRERLGSFGSITRQ-p;u	QDTQRRTSMGGTQQQ-p;u|RVRVRLLSGDTYEAV-p;u|SFRRRHNSWSSSSRH-p;u|IVNYSRASINSLLSD-p;u|ATKAARKSAPATGGV-p;u|YSRASINSLLSDKRS-p;u|LGRERLGSFGSITRQ-p;u	QDTQRRTSMGGTQQQ-p;u|GLPERSVSLTGAPES-p;u|IVNYSRASINSLLSD-p;u|YSRASINSLLSDKRS-p;u|WTRSRRKTGTLQPWN-p;u|SFRRRHNSWSSSSRH-p;u|LGRERLGSFGSITRQ-p;u|ATKAARKSAPATGGV-p;u	YSRASINSLLSDKRS-p;u|ATKAARKSAPATGGV-p;u|GLPERSVSLTGAPES-p;u|IVNYSRASINSLLSD-p;u|SFRRRHNSWSSSSRH-p;u|TPPRKSASLSNLHSL-p;u|WTRSRRKTGTLQPWN-p;u|QDTQRRTSMGGTQQQ-p;u|LGRERLGSFGSITRQ-p;u	YSRASINSLLSDKRS-p;u|QDTQRRTSMGGTQQQ-p;u|GLPERSVSLTGAPES-p;u|IVNYSRASINSLLSD-p;u|SFRRRHNSWSSSSRH-p;u|RVRVRLLSGDTYEAV-p;u|LGRERLGSFGSITRQ-p;u|TPPRKSASLSNLHSL-p;u|ATKAARKSAPATGGV-p;u	RVRVRLLSGDTYEAV-p;u|YSRASINSLLSDKRS-p;u|IVNYSRASINSLLSD-p;u|GLPERSVSLTGAPES-p;u|TPPRKSASLSNLHSL-p;u|LGRERLGSFGSITRQ-p;u|QDTQRRTSMGGTQQQ-p;u|ATKAARKSAPATGGV-p;u	YSRASINSLLSDKRS-p;u|GLPERSVSLTGAPES-p;u|QDTQRRTSMGGTQQQ-p;u|WTRSRRKTGTLQPWN-p;u|IVNYSRASINSLLSD-p;u|SFRRRHNSWSSSSRH-p;u|RVRVRLLSGDTYEAV-p;u|ATKAARKSAPATGGV-p;u|LGRERLGSFGSITRQ-p;u	IVNYSRASINSLLSD-p;u|YSRASINSLLSDKRS-p;u|GLPERSVSLTGAPES-p;u|SFRRRHNSWSSSSRH-p;u|TPPRKSASLSNLHSL-p;u|ATKAARKSAPATGGV-p;u|LGRERLGSFGSITRQ-p;u|QDTQRRTSMGGTQQQ-p;u	SFRRRHNSWSSSSRH-p;u|GLPERSVSLTGAPES-p;u|ATKAARKSAPATGGV-p;u|IVNYSRASINSLLSD-p;u|YSRASINSLLSDKRS-p;u|QDTQRRTSMGGTQQQ-p;u|TPPRKSASLSNLHSL-p;u|LGRERLGSFGSITRQ-p;u
KINASE-PSP_MKK4/MAP2K4	n=16|MAPK10_Y223|MAPK8_T183|MAPK8_T183|MAPK14_T180|MAPK8_Y185|MAPK9_Y185|MAPK8_Y185|RXRA_Y249|MAPK8_S284|MAPK10_Y223|MAPK8_Y185|MAP2K4_S257|MAPK8_T228|MAP2K4_T261|MAPK8_S377|MAPK14_Y182	11	45.5	45.5	45.5	45.5	45.5	45.5	45.5	45.5	45.5	45.5	45.5	45.5	45.5	45.5	45.5	45.5	45.5	45.5	45.5	45.5	45.5	45.5	45.5	45.5	45.5	45.5	45.5	45.5	45.5	45.5	45.5	45.5	45.5	45.5	45.5	TDDEMTGYVATRWYR-p;u|RHTDDEMTGYVATRW-p;u|TNFMMTPYVVTRYYR-p;u|TSFMMTPYVVTRYYR-p;u|AGTSFMMTPYVVTRY-p;u	TNFMMTPYVVTRYYR-p;u|TSFMMTPYVVTRYYR-p;u|AGTSFMMTPYVVTRY-p;u|RHTDDEMTGYVATRW-p;u|TDDEMTGYVATRWYR-p;u	TDDEMTGYVATRWYR-p;u|RHTDDEMTGYVATRW-p;u|TNFMMTPYVVTRYYR-p;u|AGTSFMMTPYVVTRY-p;u|TSFMMTPYVVTRYYR-p;u	TDDEMTGYVATRWYR-p;u|RHTDDEMTGYVATRW-p;u|AGTSFMMTPYVVTRY-p;u|TSFMMTPYVVTRYYR-p;u|TNFMMTPYVVTRYYR-p;u	TDDEMTGYVATRWYR-p;u|RHTDDEMTGYVATRW-p;u|TNFMMTPYVVTRYYR-p;u|AGTSFMMTPYVVTRY-p;u|TSFMMTPYVVTRYYR-p;u	TNFMMTPYVVTRYYR-p;u|TDDEMTGYVATRWYR-p;u|RHTDDEMTGYVATRW-p;u|TSFMMTPYVVTRYYR-p;u|AGTSFMMTPYVVTRY-p;u	RHTDDEMTGYVATRW-p;u|AGTSFMMTPYVVTRY-p;u|TDDEMTGYVATRWYR-p;u|TSFMMTPYVVTRYYR-p;u|TNFMMTPYVVTRYYR-p;u	RHTDDEMTGYVATRW-p;u|TDDEMTGYVATRWYR-p;u|AGTSFMMTPYVVTRY-p;u|TNFMMTPYVVTRYYR-p;u|TSFMMTPYVVTRYYR-p;u	TNFMMTPYVVTRYYR-p;u|TDDEMTGYVATRWYR-p;u|RHTDDEMTGYVATRW-p;u|TSFMMTPYVVTRYYR-p;u|AGTSFMMTPYVVTRY-p;u	RHTDDEMTGYVATRW-p;u|TDDEMTGYVATRWYR-p;u|TNFMMTPYVVTRYYR-p;u|AGTSFMMTPYVVTRY-p;u|TSFMMTPYVVTRYYR-p;u	TSFMMTPYVVTRYYR-p;u|AGTSFMMTPYVVTRY-p;u|RHTDDEMTGYVATRW-p;u|TNFMMTPYVVTRYYR-p;u|TDDEMTGYVATRWYR-p;u	RHTDDEMTGYVATRW-p;u|TDDEMTGYVATRWYR-p;u|AGTSFMMTPYVVTRY-p;u|TSFMMTPYVVTRYYR-p;u|TNFMMTPYVVTRYYR-p;u
KINASE-PSP_PRKD1	n=60|HDAC7_S486|TCAP_S157|COL4A3BP_S132|HDAC7_S155|CTNNB1_T120|SSH1_S978|BAD_S75|HDAC5_S498|DLC1_S1244|CREB1_S98|DNM1L_S637|CTNNB1_T112|CREB1_S133|TLR5_S805|MARK2_S400|RABEP1_S407|REM1_S18|SPHK2_S421|MAP3K5_T838|BAD_S118|SPHK2_S419|PAK4_S99|AKT1_S473|PPP1R14A_T38|MYBPC3_S304|HDAC7_S358|CACNA1C_S1981|CTTN_S348|JUN_S63|PI4KB_S294|PIP4K2A_T376|PTRH2_S5|RTKN_S435|CTTN_S298|ARFIP1_S132|PTRH2_S87|TFAP2…	59	39	37.3	37.3	37.3	33.9	37.3	35.6	35.6	37.3	35.6	32.2	35.6	37.3	37.3	35.6	37.3	37.3	35.6	33.9	35.6	35.6	35.6	35.6	37.3	37.3	35.6	35.6	39	33.9	35.6	35.6	37.3	39	33.9	33.9	LELVRKWSLNTYKCT-p;u|QLLRRESSVGYRVPA-p;u|MSVTRSNSLRRDSPP-p;u|TALQRSLSELESLKL-p;u|QALAKQGSLYHEMAI-p;u|GEKSFRRSVVGTPAY-p;u|EIRSRHSSYPAGTED-p;u|RPLSRTQSSPLPQSP-p;u|PFRGRSRSAPPNLWA-p;u|RPLLRSMSAAFCSLL-p;u|FPLRKTVSEPNLKLR-p;u|RPLSRAQSSPAAPAS-p;u|SNLKRTASNPKVENE-p;u|GRELRRMSDEFVDSF-p;u|WPLSRTRSEPLPPSA-p;u|KDGATMKTFCGTPEY-p;u|DGLRRAQSTDSLGTS-p;u|TTLPRMKSSSSVTTS-p;u|RPHFPQFSYSASGTA-p;u|_____MASGVAVSDG-p;u…	MSVTRSNSLRRDSPP-p;u|GRELRRMSDEFVDSF-p;u|PFRGRSRSAPPNLWA-p;u|GEKSFRRSVVGTPAY-p;u|_____MASGVAVSDG-p;u|TALQRSLSELESLKL-p;u|RPHFPQFSYSASGTA-p;u|QALAKQGSLYHEMAI-p;u|EIRSRHSSYPAGTED-p;u|KNSDLLTSPDVGLLK-p;u|RALSRQLSSGVSEIR-p;u|RPLSRAQSSPAAPAS-p;u|FPLRKTVSEPNLKLR-p;u|WPLSRTRSEPLPPSA-p;u|SNLKRTASNPKVENE-p;u|RPLLRSMSAAFCSLL-p;u|DGLRRAQSTDSLGTS-p;u|QLLRRESSVGYRVPA-p;u|TTLPRMKSSSSVTTS-p;u|LELVRKWSLNTYKCT-p;u…	MSVTRSNSLRRDSPP-p;u|QLLRRESSVGYRVPA-p;u|FPLRKTASEPNLKVR-p;u|GRELRRMSDEFVDSF-p;u|TTLPRMKSSSSVTTS-p;u|EIRSRHSSYPAGTED-p;u|RPLLRSMSAAFCSLL-p;u|WPLSRTRSEPLPPSA-p;u|RPLSRTQSSPLPQSP-p;u|PFRGRSRSAPPNLWA-p;u|TALQRSLSELESLKL-p;u|_____MASGVAVSDG-p;u|QALAKQGSLYHEMAI-p;u|GEKSFRRSVVGTPAY-p;u|RPLSRAQSSPAAPAS-p;u|DGLRRAQSTDSLGTS-p;u|RPHFPQFSYSASGTA-p;u|LELVRKWSLNTYKCT-p;u|SNLKRTASNPKVENE-p;u|KNSDLLTSPDVGLLK-p;u…	TALQRSLSELESLKL-p;u|MSVTRSNSLRRDSPP-p;u|GRELRRMSDEFVDSF-p;u|PFRGRSRSAPPNLWA-p;u|EIRSRHSSYPAGTED-p;u|KNSDLLTSPDVGLLK-p;u|RPLLRSMSAAFCSLL-p;u|QLLRRESSVGYRVPA-p;u|SNLKRTASNPKVENE-p;u|RPHFPQFSYSASGTA-p;u|RPLSRAQSSPAAPAS-p;u|KDGATMKTFCGTPEY-p;u|WPLSRTRSEPLPPSA-p;u|FPLRKTASEPNLKVR-p;u|GEKSFRRSVVGTPAY-p;u|TTLPRMKSSSSVTTS-p;u|DGLRRAQSTDSLGTS-p;u|FPLRKTVSEPNLKLR-p;u|LELVRKWSLNTYKCT-p;u|_____MASGVAVSDG-p;u…	FPLRKTASEPNLKVR-p;u|TALQRSLSELESLKL-p;u|EIRSRHSSYPAGTED-p;u|QALAKQGSLYHEMAI-p;u|RPLLRSMSAAFCSLL-p;u|PFRGRSRSAPPNLWA-p;u|WPLSRTRSEPLPPSA-p;u|GRELRRMSDEFVDSF-p;u|TTLPRMKSSSSVTTS-p;u|MSVTRSNSLRRDSPP-p;u|GEKSFRRSVVGTPAY-p;u|SNLKRTASNPKVENE-p;u|_____MASGVAVSDG-p;u|DGLRRAQSTDSLGTS-p;u|RPLSRTQSSPLPQSP-p;u|RPLSRAQSSPAAPAS-p;u|KNSDLLTSPDVGLLK-p;u|QLLRRESSVGYRVPA-p;u|FPLRKTVSEPNLKLR-p;u|RALSRQLSSGVSEIR-p;u	GRELRRMSDEFVDSF-p;u|TALQRSLSELESLKL-p;u|RPLLRSMSAAFCSLL-p;u|QALAKQGSLYHEMAI-p;u|EIRSRHSSYPAGTED-p;u|GEKSFRRSVVGTPAY-p;u|MSVTRSNSLRRDSPP-p;u|PFRGRSRSAPPNLWA-p;u|QLLRRESSVGYRVPA-p;u|KNSDLLTSPDVGLLK-p;u|LELVRKWSLNTYKCT-p;u|RPHFPQFSYSASGTA-p;u|TTLPRMKSSSSVTTS-p;u|FPLRKTASEPNLKVR-p;u|RPLSRTQSSPLPQSP-p;u|_____MASGVAVSDG-p;u|DGLRRAQSTDSLGTS-p;u|WPLSRTRSEPLPPSA-p;u|SNLKRTASNPKVENE-p;u|RPLSRAQSSPAAPAS-p;u…	RALSRQLSSGVSEIR-p;u|GRELRRMSDEFVDSF-p;u|PFRGRSRSAPPNLWA-p;u|TTLPRMKSSSSVTTS-p;u|RPLSRTQSSPLPQSP-p;u|RPHFPQFSYSASGTA-p;u|FPLRKTASEPNLKVR-p;u|EIRSRHSSYPAGTED-p;u|RPLLRSMSAAFCSLL-p;u|WPLSRTRSEPLPPSA-p;u|DGLRRAQSTDSLGTS-p;u|SNLKRTASNPKVENE-p;u|GEKSFRRSVVGTPAY-p;u|MSVTRSNSLRRDSPP-p;u|QALAKQGSLYHEMAI-p;u|TALQRSLSELESLKL-p;u|KNSDLLTSPDVGLLK-p;u|FPLRKTVSEPNLKLR-p;u|_____MASGVAVSDG-p;u|LELVRKWSLNTYKCT-p;u…	TTLPRMKSSSSVTTS-p;u|GRELRRMSDEFVDSF-p;u|TALQRSLSELESLKL-p;u|RALSRQLSSGVSEIR-p;u|PFRGRSRSAPPNLWA-p;u|SNLKRTASNPKVENE-p;u|EIRSRHSSYPAGTED-p;u|RPLLRSMSAAFCSLL-p;u|MSVTRSNSLRRDSPP-p;u|WPLSRTRSEPLPPSA-p;u|GEKSFRRSVVGTPAY-p;u|FPLRKTASEPNLKVR-p;u|KNSDLLTSPDVGLLK-p;u|KDGATMKTFCGTPEY-p;u|DGLRRAQSTDSLGTS-p;u|_____MASGVAVSDG-p;u|RPHFPQFSYSASGTA-p;u|LELVRKWSLNTYKCT-p;u|RPLSRAQSSPAAPAS-p;u|RPLSRTQSSPLPQSP-p;u…	TALQRSLSELESLKL-p;u|FPLRKTASEPNLKVR-p;u|RALSRQLSSGVSEIR-p;u|MSVTRSNSLRRDSPP-p;u|EIRSRHSSYPAGTED-p;u|RPLLRSMSAAFCSLL-p;u|DGLRRAQSTDSLGTS-p;u|PFRGRSRSAPPNLWA-p;u|RPLSRAQSSPAAPAS-p;u|WPLSRTRSEPLPPSA-p;u|SNLKRTASNPKVENE-p;u|FPLRKTVSEPNLKLR-p;u|KDGATMKTFCGTPEY-p;u|RPLSRTQSSPLPQSP-p;u|GRELRRMSDEFVDSF-p;u|KNSDLLTSPDVGLLK-p;u|GEKSFRRSVVGTPAY-p;u|TTLPRMKSSSSVTTS-p;u|QALAKQGSLYHEMAI-p;u|QLLRRESSVGYRVPA-p;u…	MSVTRSNSLRRDSPP-p;u|FPLRKTASEPNLKVR-p;u|RALSRQLSSGVSEIR-p;u|SNLKRTASNPKVENE-p;u|TTLPRMKSSSSVTTS-p;u|PFRGRSRSAPPNLWA-p;u|TALQRSLSELESLKL-p;u|RPLLRSMSAAFCSLL-p;u|EIRSRHSSYPAGTED-p;u|KNSDLLTSPDVGLLK-p;u|GRELRRMSDEFVDSF-p;u|QALAKQGSLYHEMAI-p;u|GEKSFRRSVVGTPAY-p;u|DGLRRAQSTDSLGTS-p;u|RPHFPQFSYSASGTA-p;u|WPLSRTRSEPLPPSA-p;u|_____MASGVAVSDG-p;u|FPLRKTVSEPNLKLR-p;u|RPLSRAQSSPAAPAS-p;u|RPLSRTQSSPLPQSP-p;u…	RALSRQLSSGVSEIR-p;u|GRELRRMSDEFVDSF-p;u|KNSDLLTSPDVGLLK-p;u|LELVRKWSLNTYKCT-p;u|PFRGRSRSAPPNLWA-p;u|TALQRSLSELESLKL-p;u|TTLPRMKSSSSVTTS-p;u|KDGATMKTFCGTPEY-p;u|EIRSRHSSYPAGTED-p;u|RPLLRSMSAAFCSLL-p;u|QALAKQGSLYHEMAI-p;u|DGLRRAQSTDSLGTS-p;u|GEKSFRRSVVGTPAY-p;u|_____MASGVAVSDG-p;u|SNLKRTASNPKVENE-p;u|MSVTRSNSLRRDSPP-p;u|FPLRKTASEPNLKVR-p;u|FPLRKTVSEPNLKLR-p;u|QLLRRESSVGYRVPA-p;u	LELVRKWSLNTYKCT-p;u|QLLRRESSVGYRVPA-p;u|GEKSFRRSVVGTPAY-p;u|RPLSRAQSSPAAPAS-p;u|MSVTRSNSLRRDSPP-p;u|FPLRKTVSEPNLKLR-p;u|_____MASGVAVSDG-p;u|QALAKQGSLYHEMAI-p;u|PFRGRSRSAPPNLWA-p;u|RPLLRSMSAAFCSLL-p;u|TTLPRMKSSSSVTTS-p;u|TALQRSLSELESLKL-p;u|KDGATMKTFCGTPEY-p;u|EIRSRHSSYPAGTED-p;u|KNSDLLTSPDVGLLK-p;u|FPLRKTASEPNLKVR-p;u|WPLSRTRSEPLPPSA-p;u|DGLRRAQSTDSLGTS-p;u|SNLKRTASNPKVENE-p;u|GRELRRMSDEFVDSF-p;u…
KINASE-PSP_EGFR	n=77|VAV2_Y142|GPRC5A_Y320|GSTP1_Y8|SHC1_Y194|GSTP1_Y4|CCDC50_Y304|EGFR_Y1016|SHC1_Y272|VAV2_Y172|CTNNB1_Y142|PLCG1_Y771|PTK2_Y5|PCNA_Y211|GAB1_Y406|BECN1_Y233|PLD2_Y296|GPRC5A_Y350|USP8_Y717|SCD_Y41|EGFR_Y869|SCD_Y14|ANXA1_Y21|VAV2_Y159|BECN1_Y352|EPB41_Y418|GAB1_Y447|GAB1_Y472|SHC1_Y195|SCD_Y55|FAM129B_Y593|HDAC6_Y570|LRRK1_Y971|ATM_Y370|PDP1_Y381|PLCG1_Y783|TLR3_Y858|ABCA1_S2054|RGS16_Y168|PTK…	77	19.5	19.5	18.2	16.9	22.1	19.5	19.5	15.6	19.5	18.2	20.8	20.8	16.9	23.4	23.4	16.9	19.5	19.5	22.1	14.3	19.5	23.4	20.8	23.4	19.5	19.5	18.2	19.5	15.6	19.5	23.4	23.4	19.5	19.5	22.1	DASSQDCYDIPRAFP-p;u|MPPYTVVYFPVRGRC-p;u|VADERVDYVVVDQQK-p;u|KGDKQVEYLDLDLDS-p;u|IGTAEPDYGALYEGR-p;u|GSVQNPVYHNQPLNP-p;u|ASDTDSSYCIPTAGM-p;u|ELFDDPSYVNVQNLD-p;u|EEPPDHQYYNDFPGK-p;u|EPPDHQYYNDFPGKE-p;u|RNEGVATYAAAVLFR-p;u|STAENAEYLRVAPQS-p;u|KITLDNAYMEKCDEN-p;u|QLTFALRYLNFFTKA-p;u|RLDGENIYIRHSNLM-p;u	STAENAEYLRVAPQS-p;u|GSVQNPVYHNQPLNP-p;u|TFLPVPEYINQSVPK-p;u|DASSQDCYDIPRAFP-p;u|ISLDNPDYQQDFFPK-p;u|ASDTDSSYCIPTAGM-p;u|ELFDDPSYVNVQNLD-p;u|KGDKQVEYLDLDLDS-p;u|VADERVDYVVVDQQK-p;u|EEPPDHQYYNDFPGK-p;u|EPPDHQYYNDFPGKE-p;u|MPPYTVVYFPVRGRC-p;u|KITLDNAYMEKCDEN-p;u|RLDGENIYIRHSNLM-p;u|RNEGVATYAAAVLFR-p;u	RLDGENIYIRHSNLM-p;u|DASSQDCYDIPRAFP-p;u|ASDTDSSYCIPTAGM-p;u|EEPPDHQYYNDFPGK-p;u|EPPDHQYYNDFPGKE-p;u|ELFDDPSYVNVQNLD-p;u|RNEGVATYAAAVLFR-p;u|VADERVDYVVVDQQK-p;u|STAENAEYLRVAPQS-p;u|GSVQNPVYHNQPLNP-p;u|KGDKQVEYLDLDLDS-p;u|MPPYTVVYFPVRGRC-p;u|QLTFALRYLNFFTKA-p;u|KITLDNAYMEKCDEN-p;u	VADERVDYVVVDQQK-p;u|EEPPDHQYYNDFPGK-p;u|EPPDHQYYNDFPGKE-p;u|ELFDDPSYVNVQNLD-p;u|GSVQNPVYHNQPLNP-p;u|KGDKQVEYLDLDLDS-p;u|DASSQDCYDIPRAFP-p;u|ASDTDSSYCIPTAGM-p;u|KITLDNAYMEKCDEN-p;u|STAENAEYLRVAPQS-p;u|IGTAEPDYGALYEGR-p;u|TFLPVPEYINQSVPK-p;u|RLDGENIYIRHSNLM-p;u	DASSQDCYDIPRAFP-p;u|VADERVDYVVVDQQK-p;u|KGDKQVEYLDLDLDS-p;u|GSVQNPVYHNQPLNP-p;u|ELFDDPSYVNVQNLD-p;u|ISLDNPDYQQDFFPK-p;u|STAENAEYLRVAPQS-p;u|EEPPDHQYYNDFPGK-p;u|EPPDHQYYNDFPGKE-p;u|ASDTDSSYCIPTAGM-p;u|TFLPVPEYINQSVPK-p;u|IGTAEPDYGALYEGR-p;u|KITLDNAYMEKCDEN-p;u|MPPYTVVYFPVRGRC-p;u|DVVDADEYLIPQQGF-p;u|RNEGVATYAAAVLFR-p;u|RLDGENIYIRHSNLM-p;u	DASSQDCYDIPRAFP-p;u|ASDTDSSYCIPTAGM-p;u|ELFDDPSYVNVQNLD-p;u|EEPPDHQYYNDFPGK-p;u|EPPDHQYYNDFPGKE-p;u|KGDKQVEYLDLDLDS-p;u|VADERVDYVVVDQQK-p;u|ISLDNPDYQQDFFPK-p;u|TFLPVPEYINQSVPK-p;u|STAENAEYLRVAPQS-p;u|RLDGENIYIRHSNLM-p;u|MPPYTVVYFPVRGRC-p;u|GSVQNPVYHNQPLNP-p;u|RNEGVATYAAAVLFR-p;u|KITLDNAYMEKCDEN-p;u	KITLDNAYMEKCDEN-p;u|MPPYTVVYFPVRGRC-p;u|QLTFALRYLNFFTKA-p;u|KGDKQVEYLDLDLDS-p;u|ISLDNPDYQQDFFPK-p;u|ASDTDSSYCIPTAGM-p;u|VADERVDYVVVDQQK-p;u|EEPPDHQYYNDFPGK-p;u|EPPDHQYYNDFPGKE-p;u|RNEGVATYAAAVLFR-p;u|STAENAEYLRVAPQS-p;u|ELFDDPSYVNVQNLD-p;u|GSVQNPVYHNQPLNP-p;u|RLDGENIYIRHSNLM-p;u|DASSQDCYDIPRAFP-p;u	DASSQDCYDIPRAFP-p;u|EEPPDHQYYNDFPGK-p;u|EPPDHQYYNDFPGKE-p;u|ELFDDPSYVNVQNLD-p;u|GSVQNPVYHNQPLNP-p;u|ASDTDSSYCIPTAGM-p;u|KGDKQVEYLDLDLDS-p;u|VADERVDYVVVDQQK-p;u|KITLDNAYMEKCDEN-p;u|STAENAEYLRVAPQS-p;u|RLDGENIYIRHSNLM-p;u|IGTAEPDYGALYEGR-p;u	ISLDNPDYQQDFFPK-p;u|GSVQNPVYHNQPLNP-p;u|KITLDNAYMEKCDEN-p;u|STAENAEYLRVAPQS-p;u|DVVDADEYLIPQQGF-p;u|TFLPVPEYINQSVPK-p;u|EEPPDHQYYNDFPGK-p;u|EPPDHQYYNDFPGKE-p;u|ASDTDSSYCIPTAGM-p;u|ELFDDPSYVNVQNLD-p;u|KGDKQVEYLDLDLDS-p;u|VADERVDYVVVDQQK-p;u|RLDGENIYIRHSNLM-p;u|DASSQDCYDIPRAFP-p;u|IGTAEPDYGALYEGR-p;u	MPPYTVVYFPVRGRC-p;u|KITLDNAYMEKCDEN-p;u|EEPPDHQYYNDFPGK-p;u|EPPDHQYYNDFPGKE-p;u|ELFDDPSYVNVQNLD-p;u|ISLDNPDYQQDFFPK-p;u|KGDKQVEYLDLDLDS-p;u|VADERVDYVVVDQQK-p;u|ASDTDSSYCIPTAGM-p;u|GSVQNPVYHNQPLNP-p;u|STAENAEYLRVAPQS-p;u|RNEGVATYAAAVLFR-p;u|DASSQDCYDIPRAFP-p;u|RLDGENIYIRHSNLM-p;u	ELFDDPSYVNVQNLD-p;u|EEPPDHQYYNDFPGK-p;u|EPPDHQYYNDFPGKE-p;u|STAENAEYLRVAPQS-p;u|VADERVDYVVVDQQK-p;u|KGDKQVEYLDLDLDS-p;u|ASDTDSSYCIPTAGM-p;u|GSVQNPVYHNQPLNP-p;u|DASSQDCYDIPRAFP-p;u|MPPYTVVYFPVRGRC-p;u|ISLDNPDYQQDFFPK-p;u|KITLDNAYMEKCDEN-p;u|QLTFALRYLNFFTKA-p;u|IGTAEPDYGALYEGR-p;u|RNEGVATYAAAVLFR-p;u|RLDGENIYIRHSNLM-p;u	DASSQDCYDIPRAFP-p;u|ASDTDSSYCIPTAGM-p;u|RLDGENIYIRHSNLM-p;u|ELFDDPSYVNVQNLD-p;u|KGDKQVEYLDLDLDS-p;u|VADERVDYVVVDQQK-p;u|ISLDNPDYQQDFFPK-p;u|STAENAEYLRVAPQS-p;u|EEPPDHQYYNDFPGK-p;u|EPPDHQYYNDFPGKE-p;u|GSVQNPVYHNQPLNP-p;u|MPPYTVVYFPVRGRC-p;u|KITLDNAYMEKCDEN-p;u|TFLPVPEYINQSVPK-p;u|IGTAEPDYGALYEGR-p;u|RNEGVATYAAAVLFR-p;u
KINASE-PSP_PDK1/PDPK1	n=31|SGK2_T253|PDPK1_S393|PKN1_S773|EPAS1_T324|PDHA1_S293|PDPK1_S241|AKT2_T309|ITGB3_T779|PRKCZ_T410|RPS6KB1_T252|PDHA1_S300|RPS6KB1_T412|AKT1_S473|PIP5K1C_S448|PDPK1_S410|MAP2K1_S222|PDHA1_S232|PDPK1_T513|SGK3_T320|AKT3_T305|PDPK1_S25|SGK1_T256|MAP2K2_S226|RPS6KB1_T229|PAK1_T423|PDPK1_S396|MAP3K5_S966|PKN1_T774|AKT1_T308|PKN2_T816|PRKCE_T566	28	35.7	25	32.1	35.7	21.4	25	32.1	35.7	28.6	32.1	32.1	28.6	35.7	32.1	32.1	35.7	28.6	32.1	21.4	32.1	32.1	32.1	28.6	32.1	25	32.1	32.1	35.7	32.1	32.1	32.1	32.1	35.7	21.4	21.4	GPGDTTSTFCGTPNY-p;u|SKQARANSFVGTAQY-p;u|NRYGMGTSVERAAAS-p;u|GYGDRTSTFCGTPEF-p;u|LIDSMANSFVGTRSY-p;u|VVLCSCPSPSMVRTQ-p;u|SMSDPGVSYRTREEI-p;u|TYRYHGHSMSDPGVS-p;u|KDGATMKTFCGTPEY-p;u|RPHFPQFSYSASGTA-p;u	VVLCSCPSPSMVRTQ-p;u|RPHFPQFSYSASGTA-p;u|GYGDRTSTFCGTPEF-p;u|LIDSMANSFVGTRSY-p;u|SKQARANSFVGTAQY-p;u|SMSDPGVSYRTREEI-p;u|NRYGMGTSVERAAAS-p;u	NRYGMGTSVERAAAS-p;u|VVLCSCPSPSMVRTQ-p;u|GPGDTTSTFCGTPNY-p;u|SKQARANSFVGTAQY-p;u|GYGDRTSTFCGTPEF-p;u|LIDSMANSFVGTRSY-p;u|SMSDPGVSYRTREEI-p;u|RPHFPQFSYSASGTA-p;u|TYRYHGHSMSDPGVS-p;u	NRYGMGTSVERAAAS-p;u|SMSDPGVSYRTREEI-p;u|TYRYHGHSMSDPGVS-p;u|SKQARANSFVGTAQY-p;u|VVLCSCPSPSMVRTQ-p;u|GPGDTTSTFCGTPNY-p;u|LIDSMANSFVGTRSY-p;u|RPHFPQFSYSASGTA-p;u|KDGATMKTFCGTPEY-p;u|GYGDRTSTFCGTPEF-p;u	NRYGMGTSVERAAAS-p;u|SMSDPGVSYRTREEI-p;u|LIDSMANSFVGTRSY-p;u|VVLCSCPSPSMVRTQ-p;u|SKQARANSFVGTAQY-p;u|GYGDRTSTFCGTPEF-p;u	NRYGMGTSVERAAAS-p;u|SMSDPGVSYRTREEI-p;u|VVLCSCPSPSMVRTQ-p;u|SKQARANSFVGTAQY-p;u|LIDSMANSFVGTRSY-p;u|RPHFPQFSYSASGTA-p;u|GYGDRTSTFCGTPEF-p;u	SMSDPGVSYRTREEI-p;u|RPHFPQFSYSASGTA-p;u|SKQARANSFVGTAQY-p;u|VVLCSCPSPSMVRTQ-p;u|GYGDRTSTFCGTPEF-p;u|TYRYHGHSMSDPGVS-p;u|NRYGMGTSVERAAAS-p;u|GPGDTTSTFCGTPNY-p;u|LIDSMANSFVGTRSY-p;u	NRYGMGTSVERAAAS-p;u|SMSDPGVSYRTREEI-p;u|TYRYHGHSMSDPGVS-p;u|SKQARANSFVGTAQY-p;u|VVLCSCPSPSMVRTQ-p;u|GPGDTTSTFCGTPNY-p;u|GYGDRTSTFCGTPEF-p;u|LIDSMANSFVGTRSY-p;u|KDGATMKTFCGTPEY-p;u|RPHFPQFSYSASGTA-p;u	VVLCSCPSPSMVRTQ-p;u|SKQARANSFVGTAQY-p;u|GPGDTTSTFCGTPNY-p;u|GYGDRTSTFCGTPEF-p;u|KDGATMKTFCGTPEY-p;u|SMSDPGVSYRTREEI-p;u|LIDSMANSFVGTRSY-p;u|NRYGMGTSVERAAAS-p;u	SMSDPGVSYRTREEI-p;u|NRYGMGTSVERAAAS-p;u|SKQARANSFVGTAQY-p;u|GPGDTTSTFCGTPNY-p;u|TYRYHGHSMSDPGVS-p;u|VVLCSCPSPSMVRTQ-p;u|GYGDRTSTFCGTPEF-p;u|LIDSMANSFVGTRSY-p;u|RPHFPQFSYSASGTA-p;u	NRYGMGTSVERAAAS-p;u|SMSDPGVSYRTREEI-p;u|SKQARANSFVGTAQY-p;u|KDGATMKTFCGTPEY-p;u|GPGDTTSTFCGTPNY-p;u|VVLCSCPSPSMVRTQ-p;u|TYRYHGHSMSDPGVS-p;u|GYGDRTSTFCGTPEF-p;u|LIDSMANSFVGTRSY-p;u	LIDSMANSFVGTRSY-p;u|SKQARANSFVGTAQY-p;u|SMSDPGVSYRTREEI-p;u|GPGDTTSTFCGTPNY-p;u|VVLCSCPSPSMVRTQ-p;u|GYGDRTSTFCGTPEF-p;u|KDGATMKTFCGTPEY-p;u|NRYGMGTSVERAAAS-p;u
KINASE-PSP_PAK1	n=66|PGM1_T467|FXR1_S420|PAK1_S199|ARPC1B_T21|GNAZ_S16|RAF1_S339|ILK_S246|BAD_S75|ARHGEF2_S886|MAP3K1_S67|TBCB_S128|KIF2C_S192|PGAM1_S23|ELF3_S207|CRK_S41|CTNNB1_S675|MORC2_S739|BAD_S118|PXN_S258|GIT1_S508|TBCB_S65|PXN_S272|PLK1_S49|HIST1H3A_S10|ITGB3BP_S28|BAD_S74|MYL9_S20|FLNA_S2152|SNAI2_S251|SNAI1_S246|FLNA_S2292|ARHGDIA_S174|FLNA_S2370|PCBP1_T60|CTTN_S405|BRAF_S446|DYNLL1_S88|PGAM1_S118|SPEN…	66	34.8	36.4	36.4	34.8	34.8	36.4	36.4	34.8	34.8	36.4	34.8	34.8	34.8	36.4	34.8	34.8	34.8	36.4	34.8	36.4	36.4	34.8	34.8	36.4	36.4	36.4	36.4	34.8	33.3	36.4	34.8	36.4	34.8	34.8	34.8	SNSQKYMSFTDKSAE-p;u|KTQTPPVSPAPQPTE-p;u|TQQQTRISASSATRE-p;u|ATPSRKRSVAVSDEE-p;u|TEERLPSSPVYEDAA-p;u|KTLGRRDSSDDWEIP-p;u|TRRRRAPSVANVGSH-p;u|EIRSRHSSYPAGTED-p;u|QVKIWRRSYDVPPPP-p;u|KRPQRATSNVFAMFD-p;u|KELEKRASGQAFELI-p;u|VFLVRDSSTSPGDYV-p;u|PFRGRSRSAPPNLWA-p;u|VNSVRRKSCLVKEVE-p;u|KGLPRPKSAGTATQM-p;u|QDYKKRLSVELTSSL-p;u|LMKNKRDSTEITSIL-p;u|PVDPRRRSLPAGDAL-p;u|GRELRRMSDEFVDSF-p;u|SVPEFPLSPPKKKDL-p;u…	TEERLPSSPVYEDAA-p;u|TRRRRAPSVANVGSH-p;u|GRELRRMSDEFVDSF-p;u|KGLPRPKSAGTATQM-p;u|PFRGRSRSAPPNLWA-p;u|KRPQRATSNVFAMFD-p;u|KELEKRASGQAFELI-p;u|TQQQTRISASSATRE-p;u|KTQTPPVSPAPQPTE-p;u|SVPEFPLSPPKKKDL-p;u|EIRSRHSSYPAGTED-p;u|QDYKKRLSVELTSSL-p;u|ATPSRKRSVAVSDEE-p;u|QVKIWRRSYDVPPPP-p;u|KTLGRRDSSDDWEIP-p;u|LMKNKRDSTEITSIL-p;u|PVDPRRRSLPAGDAL-p;u|VNSVRRKSCLVKEVE-p;u|VFLVRDSSTSPGDYV-p;u|SERKDELSDWSLAGE-p;u…	SNSQKYMSFTDKSAE-p;u|KGLPRPKSAGTATQM-p;u|QVKIWRRSYDVPPPP-p;u|GRELRRMSDEFVDSF-p;u|ATPSRKRSVAVSDEE-p;u|QDYKKRLSVELTSSL-p;u|EIRSRHSSYPAGTED-p;u|VFLVRDSSTSPGDYV-p;u|KELEKRASGQAFELI-p;u|KTLGRRDSSDDWEIP-p;u|SVPEFPLSPPKKKDL-p;u|PFRGRSRSAPPNLWA-p;u|VNSVRRKSCLVKEVE-p;u|LMKNKRDSTEITSIL-p;u|KTQTPPVSPAPQPTE-p;u|PVDPRRRSLPAGDAL-p;u|LESFKKQSFVLKEGV-p;u|TEERLPSSPVYEDAA-p;u|KRPQRATSNVFAMFD-p;u|TQQQTRISASSATRE-p;u…	KGLPRPKSAGTATQM-p;u|GRELRRMSDEFVDSF-p;u|PFRGRSRSAPPNLWA-p;u|SNSQKYMSFTDKSAE-p;u|ATPSRKRSVAVSDEE-p;u|EIRSRHSSYPAGTED-p;u|VNSVRRKSCLVKEVE-p;u|KTLGRRDSSDDWEIP-p;u|QDYKKRLSVELTSSL-p;u|VFLVRDSSTSPGDYV-p;u|KELEKRASGQAFELI-p;u|SVPEFPLSPPKKKDL-p;u|KTQTPPVSPAPQPTE-p;u|TEERLPSSPVYEDAA-p;u|QVKIWRRSYDVPPPP-p;u|LMKNKRDSTEITSIL-p;u|TRRRRAPSVANVGSH-p;u|PVDPRRRSLPAGDAL-p;u|TQQQTRISASSATRE-p;u|DTDMKRLSMEIEKEK-p;u…	QDYKKRLSVELTSSL-p;u|TEERLPSSPVYEDAA-p;u|KTQTPPVSPAPQPTE-p;u|ATPSRKRSVAVSDEE-p;u|VFLVRDSSTSPGDYV-p;u|VNSVRRKSCLVKEVE-p;u|KTLGRRDSSDDWEIP-p;u|EIRSRHSSYPAGTED-p;u|SNSQKYMSFTDKSAE-p;u|PFRGRSRSAPPNLWA-p;u|GRELRRMSDEFVDSF-p;u|TRRRRAPSVANVGSH-p;u|KRPQRATSNVFAMFD-p;u|PVDPRRRSLPAGDAL-p;u|TQQQTRISASSATRE-p;u|KGLPRPKSAGTATQM-p;u|QVKIWRRSYDVPPPP-p;u|SERKDELSDWSLAGE-p;u|DTDMKRLSMEIEKEK-p;u|LMKNKRDSTEITSIL-p;u…	ATPSRKRSVAVSDEE-p;u|QDYKKRLSVELTSSL-p;u|KTQTPPVSPAPQPTE-p;u|SNSQKYMSFTDKSAE-p;u|TEERLPSSPVYEDAA-p;u|LESFKKQSFVLKEGV-p;u|GRELRRMSDEFVDSF-p;u|EIRSRHSSYPAGTED-p;u|KTLGRRDSSDDWEIP-p;u|PFRGRSRSAPPNLWA-p;u|TQQQTRISASSATRE-p;u|QVKIWRRSYDVPPPP-p;u|PVDPRRRSLPAGDAL-p;u|VFLVRDSSTSPGDYV-p;u|SERKDELSDWSLAGE-p;u|KGLPRPKSAGTATQM-p;u|TRRRRAPSVANVGSH-p;u|LMKNKRDSTEITSIL-p;u|VNSVRRKSCLVKEVE-p;u|SVPEFPLSPPKKKDL-p;u…	SRSLYASSPGGVYAT-p;u|PVDPRRRSLPAGDAL-p;u|VNSVRRKSCLVKEVE-p;u|KGLPRPKSAGTATQM-p;u|GRELRRMSDEFVDSF-p;u|ATPSRKRSVAVSDEE-p;u|PFRGRSRSAPPNLWA-p;u|SVPEFPLSPPKKKDL-p;u|TRRRRAPSVANVGSH-p;u|KTLGRRDSSDDWEIP-p;u|LESFKKQSFVLKEGV-p;u|EIRSRHSSYPAGTED-p;u|KTQTPPVSPAPQPTE-p;u|TEERLPSSPVYEDAA-p;u|VFLVRDSSTSPGDYV-p;u|KELEKRASGQAFELI-p;u|LMKNKRDSTEITSIL-p;u|KRPQRATSNVFAMFD-p;u|QVKIWRRSYDVPPPP-p;u|SERKDELSDWSLAGE-p;u…	KGLPRPKSAGTATQM-p;u|GRELRRMSDEFVDSF-p;u|PVDPRRRSLPAGDAL-p;u|PFRGRSRSAPPNLWA-p;u|ATPSRKRSVAVSDEE-p;u|QDYKKRLSVELTSSL-p;u|EIRSRHSSYPAGTED-p;u|TEERLPSSPVYEDAA-p;u|VNSVRRKSCLVKEVE-p;u|KTQTPPVSPAPQPTE-p;u|KTLGRRDSSDDWEIP-p;u|KRPQRATSNVFAMFD-p;u|TRRRRAPSVANVGSH-p;u|VFLVRDSSTSPGDYV-p;u|SERKDELSDWSLAGE-p;u|QVKIWRRSYDVPPPP-p;u|SNSQKYMSFTDKSAE-p;u|SVPEFPLSPPKKKDL-p;u|LMKNKRDSTEITSIL-p;u|DTDMKRLSMEIEKEK-p;u…	LMKNKRDSTEITSIL-p;u|EIRSRHSSYPAGTED-p;u|KTQTPPVSPAPQPTE-p;u|ATPSRKRSVAVSDEE-p;u|KGLPRPKSAGTATQM-p;u|VFLVRDSSTSPGDYV-p;u|TRRRRAPSVANVGSH-p;u|KTLGRRDSSDDWEIP-p;u|PFRGRSRSAPPNLWA-p;u|TEERLPSSPVYEDAA-p;u|QVKIWRRSYDVPPPP-p;u|SVPEFPLSPPKKKDL-p;u|VNSVRRKSCLVKEVE-p;u|GRELRRMSDEFVDSF-p;u|SERKDELSDWSLAGE-p;u|PVDPRRRSLPAGDAL-p;u|KELEKRASGQAFELI-p;u|DTDMKRLSMEIEKEK-p;u|SNSQKYMSFTDKSAE-p;u|QDYKKRLSVELTSSL-p;u…	TEERLPSSPVYEDAA-p;u|LESFKKQSFVLKEGV-p;u|ATPSRKRSVAVSDEE-p;u|KGLPRPKSAGTATQM-p;u|KTQTPPVSPAPQPTE-p;u|QDYKKRLSVELTSSL-p;u|SNSQKYMSFTDKSAE-p;u|PFRGRSRSAPPNLWA-p;u|PVDPRRRSLPAGDAL-p;u|EIRSRHSSYPAGTED-p;u|GRELRRMSDEFVDSF-p;u|KTLGRRDSSDDWEIP-p;u|VFLVRDSSTSPGDYV-p;u|QVKIWRRSYDVPPPP-p;u|KRPQRATSNVFAMFD-p;u|VNSVRRKSCLVKEVE-p;u|TRRRRAPSVANVGSH-p;u|SVPEFPLSPPKKKDL-p;u|SERKDELSDWSLAGE-p;u|LMKNKRDSTEITSIL-p;u…	KGLPRPKSAGTATQM-p;u|GRELRRMSDEFVDSF-p;u|SNSQKYMSFTDKSAE-p;u|TEERLPSSPVYEDAA-p;u|ATPSRKRSVAVSDEE-p;u|KTQTPPVSPAPQPTE-p;u|PFRGRSRSAPPNLWA-p;u|TQQQTRISASSATRE-p;u|TRRRRAPSVANVGSH-p;u|KTLGRRDSSDDWEIP-p;u|VFLVRDSSTSPGDYV-p;u|QVKIWRRSYDVPPPP-p;u|EIRSRHSSYPAGTED-p;u|KRPQRATSNVFAMFD-p;u|VNSVRRKSCLVKEVE-p;u|PVDPRRRSLPAGDAL-p;u|LMKNKRDSTEITSIL-p;u|SERKDELSDWSLAGE-p;u|SVPEFPLSPPKKKDL-p;u|DTDMKRLSMEIEKEK-p;u…	SNSQKYMSFTDKSAE-p;u|TQQQTRISASSATRE-p;u|KRPQRATSNVFAMFD-p;u|TEERLPSSPVYEDAA-p;u|PVDPRRRSLPAGDAL-p;u|QDYKKRLSVELTSSL-p;u|QVKIWRRSYDVPPPP-p;u|TRRRRAPSVANVGSH-p;u|ATPSRKRSVAVSDEE-p;u|DTDMKRLSMEIEKEK-p;u|KTQTPPVSPAPQPTE-p;u|KELEKRASGQAFELI-p;u|PFRGRSRSAPPNLWA-p;u|VNSVRRKSCLVKEVE-p;u|EIRSRHSSYPAGTED-p;u|KTLGRRDSSDDWEIP-p;u|SVPEFPLSPPKKKDL-p;u|SERKDELSDWSLAGE-p;u|VFLVRDSSTSPGDYV-p;u|KGLPRPKSAGTATQM-p;u…
KINASE-PSP_PLK3	n=30|ATF2_T69|YWHAE_T208|ATF2_T71|CHEK2_S73|TOP2A_T1343|PTEN_T366|CALU_S44|CHEK2_S62|HSP90AB1_S718|CALU_T196|NPM1_S4|CDC25C_S198|JUN_S73|TP53_S20|CCNB1_S133|CALU_T254|JUN_S63|CASP8_T273|VRK1_S342|CDC25A_T80|CALU_T60|PTEN_S370|OCLN_S471|CDC25C_S191|SNCB_S118|HIF1A_S576|BCL2L1_S49|SNCA_S129|HIF1A_S657|CALU_T177	30	20	20	20	20	16.7	20	20	20	20	20	20	20	20	20	20	20	20	20	16.7	20	20	20	20	20	20	20	20	20	13.3	20	20	20	20	16.7	16.7	SVIVADQTPTPTRFL-p;u|IVADQTPTPTRFLKN-p;u|DAIAELDTLSEESYK-p;u|____MEDSMDMDMSP-p;u|LEGDEDASRMEEVD_-p;u|KNSDLLTSPDVGLLK-p;u	KNSDLLTSPDVGLLK-p;u|SVIVADQTPTPTRFL-p;u|IVADQTPTPTRFLKN-p;u|____MEDSMDMDMSP-p;u|LEGDEDASRMEEVD_-p;u|DAIAELDTLSEESYK-p;u	LEGDEDASRMEEVD_-p;u|____MEDSMDMDMSP-p;u|IVADQTPTPTRFLKN-p;u|DAIAELDTLSEESYK-p;u|SVIVADQTPTPTRFL-p;u|KNSDLLTSPDVGLLK-p;u	KNSDLLTSPDVGLLK-p;u|DAIAELDTLSEESYK-p;u|LEGDEDASRMEEVD_-p;u|SVIVADQTPTPTRFL-p;u|IVADQTPTPTRFLKN-p;u|____MEDSMDMDMSP-p;u	____MEDSMDMDMSP-p;u|SVIVADQTPTPTRFL-p;u|IVADQTPTPTRFLKN-p;u|LEGDEDASRMEEVD_-p;u|KNSDLLTSPDVGLLK-p;u	DAIAELDTLSEESYK-p;u|SVIVADQTPTPTRFL-p;u|IVADQTPTPTRFLKN-p;u|KNSDLLTSPDVGLLK-p;u|____MEDSMDMDMSP-p;u|LEGDEDASRMEEVD_-p;u	SVIVADQTPTPTRFL-p;u|IVADQTPTPTRFLKN-p;u|LEGDEDASRMEEVD_-p;u|____MEDSMDMDMSP-p;u|KNSDLLTSPDVGLLK-p;u|DAIAELDTLSEESYK-p;u	DAIAELDTLSEESYK-p;u|SVIVADQTPTPTRFL-p;u|IVADQTPTPTRFLKN-p;u|LEGDEDASRMEEVD_-p;u|KNSDLLTSPDVGLLK-p;u|____MEDSMDMDMSP-p;u	DAIAELDTLSEESYK-p;u|LEGDEDASRMEEVD_-p;u|SVIVADQTPTPTRFL-p;u|IVADQTPTPTRFLKN-p;u|____MEDSMDMDMSP-p;u|KNSDLLTSPDVGLLK-p;u	DAIAELDTLSEESYK-p;u|SVIVADQTPTPTRFL-p;u|IVADQTPTPTRFLKN-p;u|KNSDLLTSPDVGLLK-p;u|LEGDEDASRMEEVD_-p;u|____MEDSMDMDMSP-p;u	KNSDLLTSPDVGLLK-p;u|DAIAELDTLSEESYK-p;u|LEGDEDASRMEEVD_-p;u|IVADQTPTPTRFLKN-p;u|SVIVADQTPTPTRFL-p;u|____MEDSMDMDMSP-p;u	____MEDSMDMDMSP-p;u|DAIAELDTLSEESYK-p;u|SVIVADQTPTPTRFL-p;u|IVADQTPTPTRFLKN-p;u|LEGDEDASRMEEVD_-p;u|KNSDLLTSPDVGLLK-p;u
KINASE-PSP_MAPKAPK2	n=65|CDC25B_S169|HNRNPA0_S84|HSPB1_S78|LIMK1_S323|WNK4_S575|CREB1_S133|RCSD1_S179|MKL1_S333|YWHAZ_S58|AGO2_S387|BAG2_S20|MDM2_S157|MDM2_S166|EEF2K_S377|TH_S44|KRT18_S53|NELFE_S51|MAPKAPK2_T338|ZFP36L1_S92|RTN4_S107|PLK1_S326|CEP131_S47|RCSD1_S244|AKT1_S473|ARPC5_S77|TP53_S20|TRIM29_S550|CDC25B_S323|ZFP36L1_S203|TH_S19|PLK1_S383|PARN_S557|DDX5_S198|TH_S19|TH_S67|CEP131_S78|DAZL_S65|RIPK1_S320|ZFP3…	59	42.4	37.3	39	40.7	35.6	37.3	39	39	39	39	39	37.3	40.7	39	39	40.7	39	40.7	35.6	37.3	39	39	37.3	39	37.3	39	39	42.4	37.3	39	39	39	42.4	35.6	35.6	GPFRRSDSFPERRAP-p;u|GGVKRSLSEQPVMDT-p;u|NPLMRRNSVTPLASP-p;u|AVKDRAGSIVLKVLI-p;u|QPFQRSISADDDLQE-p;u|KPIVRSVSVVTGSEQ-p;u|SGVKRSRSGEGEVSG-p;u|TALYKSLSVPAASTA-p;u|ISVSRSTSFRGGMGS-p;u|VAPERQPSWDPSPVS-p;u|NIKRKVTSVSTLKSE-p;u|SGLYRSPSMPENLNR-p;u|QRLFRSPSMPCSVIR-p;u|NHYYRNNSFTAPSTV-p;u|AVVKRMQSLQLDCVA-p;u|VQNKRRRSVTPPEEQ-p;u|NNLRRSNSTTQVSQP-p;u|RGLKRSLSEMEIGMV-p;u|SKLMRSASFNTDPYV-p;u|GGFPRRHSVTLPSSK-p;u…	VAPERQPSWDPSPVS-p;u|QPFQRSISADDDLQE-p;u|FSLLRGPSWDPFRDW-p;u|GPFRRSDSFPERRAP-p;u|AVKDRAGSIVLKVLI-p;u|KPIVRSVSVVTGSEQ-p;u|GGVKRSLSEQPVMDT-p;u|AVVKRMQSLQLDCVA-p;u|RPHFPQFSYSASGTA-p;u|ISVSRSTSFRGGMGS-p;u|GGFPRRHSVTLPSSK-p;u|SKLMRSASFNTDPYV-p;u|RALSRQLSSGVSEIR-p;u|RFRDRSFSEGGERLL-p;u|NPLMRRNSVTPLASP-p;u|VQNKRRRSVTPPEEQ-p;u|TALYKSLSVPAASTA-p;u|NHYYRNNSFTAPSTV-p;u|SGVKRSRSGEGEVSG-p;u|QRLFRSPSMPCSVIR-p;u…	SGLYRSPSMPENLNR-p;u|NIKRKVTSVSTLKSE-p;u|GPFRRSDSFPERRAP-p;u|NNLRRSNSTTQVSQP-p;u|AVVKRMQSLQLDCVA-p;u|QPFQRSISADDDLQE-p;u|KPIVRSVSVVTGSEQ-p;u|GGVKRSLSEQPVMDT-p;u|AVKDRAGSIVLKVLI-p;u|TALYKSLSVPAASTA-p;u|GRFCRSSSMADRSSR-p;u|VQNKRRRSVTPPEEQ-p;u|NHYYRNNSFTAPSTV-p;u|SKLMRSASFNTDPYV-p;u|ISVSRSTSFRGGMGS-p;u|RPHFPQFSYSASGTA-p;u|NPLMRRNSVTPLASP-p;u|GGFPRRHSVTLPSSK-p;u|SGVKRSRSGEGEVSG-p;u|RFRDRSFSEGGERLL-p;u…	KPIVRSVSVVTGSEQ-p;u|GPFRRSDSFPERRAP-p;u|NNLRRSNSTTQVSQP-p;u|QPFQRSISADDDLQE-p;u|NHYYRNNSFTAPSTV-p;u|GGVKRSLSEQPVMDT-p;u|NPLMRRNSVTPLASP-p;u|AVVKRMQSLQLDCVA-p;u|SGLYRSPSMPENLNR-p;u|ISVSRSTSFRGGMGS-p;u|VAPERQPSWDPSPVS-p;u|AVKDRAGSIVLKVLI-p;u|SGVKRSRSGEGEVSG-p;u|QRLFRSPSMPCSVIR-p;u|SKLMRSASFNTDPYV-p;u|RPHFPQFSYSASGTA-p;u|RGLKRSLSEMEIGMV-p;u|VQNKRRRSVTPPEEQ-p;u|RFRDRSFSEGGERLL-p;u|GGFPRRHSVTLPSSK-p;u…	QPFQRSISADDDLQE-p;u|GGVKRSLSEQPVMDT-p;u|GPFRRSDSFPERRAP-p;u|SGVKRSRSGEGEVSG-p;u|AVKDRAGSIVLKVLI-p;u|VAPERQPSWDPSPVS-p;u|NPLMRRNSVTPLASP-p;u|NHYYRNNSFTAPSTV-p;u|AVVKRMQSLQLDCVA-p;u|ISVSRSTSFRGGMGS-p;u|TALYKSLSVPAASTA-p;u|SGLYRSPSMPENLNR-p;u|VQNKRRRSVTPPEEQ-p;u|GGFPRRHSVTLPSSK-p;u|NNLRRSNSTTQVSQP-p;u|KPIVRSVSVVTGSEQ-p;u|RFRDRSFSEGGERLL-p;u|QRLFRSPSMPCSVIR-p;u|FSLLRGPSWDPFRDW-p;u|RALSRQLSSGVSEIR-p;u…	GPFRRSDSFPERRAP-p;u|ISVSRSTSFRGGMGS-p;u|QPFQRSISADDDLQE-p;u|NPLMRRNSVTPLASP-p;u|AVKDRAGSIVLKVLI-p;u|KPIVRSVSVVTGSEQ-p;u|SGVKRSRSGEGEVSG-p;u|AVVKRMQSLQLDCVA-p;u|VAPERQPSWDPSPVS-p;u|NHYYRNNSFTAPSTV-p;u|NNLRRSNSTTQVSQP-p;u|GGVKRSLSEQPVMDT-p;u|TALYKSLSVPAASTA-p;u|RPHFPQFSYSASGTA-p;u|SKLMRSASFNTDPYV-p;u|VQNKRRRSVTPPEEQ-p;u|SGLYRSPSMPENLNR-p;u|QRLFRSPSMPCSVIR-p;u|GGFPRRHSVTLPSSK-p;u|FSLLRGPSWDPFRDW-p;u…	RALSRQLSSGVSEIR-p;u|FSLLRGPSWDPFRDW-p;u|RFRDRSFSEGGERLL-p;u|GGFPRRHSVTLPSSK-p;u|TALYKSLSVPAASTA-p;u|GPFRRSDSFPERRAP-p;u|NPLMRRNSVTPLASP-p;u|NHYYRNNSFTAPSTV-p;u|KPIVRSVSVVTGSEQ-p;u|VAPERQPSWDPSPVS-p;u|QPFQRSISADDDLQE-p;u|VQNKRRRSVTPPEEQ-p;u|SGVKRSRSGEGEVSG-p;u|AVVKRMQSLQLDCVA-p;u|RPHFPQFSYSASGTA-p;u|ISVSRSTSFRGGMGS-p;u|SKLMRSASFNTDPYV-p;u|AVKDRAGSIVLKVLI-p;u|GGVKRSLSEQPVMDT-p;u|QRLFRSPSMPCSVIR-p;u…	ISVSRSTSFRGGMGS-p;u|GPFRRSDSFPERRAP-p;u|NHYYRNNSFTAPSTV-p;u|SGVKRSRSGEGEVSG-p;u|GGVKRSLSEQPVMDT-p;u|FSLLRGPSWDPFRDW-p;u|NPLMRRNSVTPLASP-p;u|RALSRQLSSGVSEIR-p;u|QPFQRSISADDDLQE-p;u|KPIVRSVSVVTGSEQ-p;u|NIKRKVTSVSTLKSE-p;u|GGFPRRHSVTLPSSK-p;u|TALYKSLSVPAASTA-p;u|NNLRRSNSTTQVSQP-p;u|RFRDRSFSEGGERLL-p;u|QRLFRSPSMPCSVIR-p;u|VQNKRRRSVTPPEEQ-p;u|RGLKRSLSEMEIGMV-p;u|VAPERQPSWDPSPVS-p;u|AVVKRMQSLQLDCVA-p;u…	ISVSRSTSFRGGMGS-p;u|FSLLRGPSWDPFRDW-p;u|NNLRRSNSTTQVSQP-p;u|GGFPRRHSVTLPSSK-p;u|SGVKRSRSGEGEVSG-p;u|RALSRQLSSGVSEIR-p;u|QPFQRSISADDDLQE-p;u|NPLMRRNSVTPLASP-p;u|GRFCRSSSMADRSSR-p;u|RFRDRSFSEGGERLL-p;u|TALYKSLSVPAASTA-p;u|KPIVRSVSVVTGSEQ-p;u|NHYYRNNSFTAPSTV-p;u|GPFRRSDSFPERRAP-p;u|GGVKRSLSEQPVMDT-p;u|AVVKRMQSLQLDCVA-p;u|RGLKRSLSEMEIGMV-p;u|VAPERQPSWDPSPVS-p;u|AVKDRAGSIVLKVLI-p;u|VQNKRRRSVTPPEEQ-p;u…	ISVSRSTSFRGGMGS-p;u|GPFRRSDSFPERRAP-p;u|QPFQRSISADDDLQE-p;u|NHYYRNNSFTAPSTV-p;u|GGVKRSLSEQPVMDT-p;u|RFRDRSFSEGGERLL-p;u|KPIVRSVSVVTGSEQ-p;u|RALSRQLSSGVSEIR-p;u|FSLLRGPSWDPFRDW-p;u|TALYKSLSVPAASTA-p;u|GGFPRRHSVTLPSSK-p;u|NIKRKVTSVSTLKSE-p;u|NPLMRRNSVTPLASP-p;u|SGVKRSRSGEGEVSG-p;u|AVVKRMQSLQLDCVA-p;u|AVKDRAGSIVLKVLI-p;u|VAPERQPSWDPSPVS-p;u|VQNKRRRSVTPPEEQ-p;u|SGLYRSPSMPENLNR-p;u|SKLMRSASFNTDPYV-p;u…	FSLLRGPSWDPFRDW-p;u|RALSRQLSSGVSEIR-p;u|SGVKRSRSGEGEVSG-p;u|GGVKRSLSEQPVMDT-p;u|QPFQRSISADDDLQE-p;u|NPLMRRNSVTPLASP-p;u|ISVSRSTSFRGGMGS-p;u|GPFRRSDSFPERRAP-p;u|VAPERQPSWDPSPVS-p;u|NHYYRNNSFTAPSTV-p;u|KPIVRSVSVVTGSEQ-p;u|TALYKSLSVPAASTA-p;u|AVVKRMQSLQLDCVA-p;u|AVKDRAGSIVLKVLI-p;u|SKLMRSASFNTDPYV-p;u|VQNKRRRSVTPPEEQ-p;u|RGLKRSLSEMEIGMV-p;u|GGFPRRHSVTLPSSK-p;u|NNLRRSNSTTQVSQP-p;u|SGLYRSPSMPENLNR-p;u…	KPIVRSVSVVTGSEQ-p;u|VAPERQPSWDPSPVS-p;u|GPFRRSDSFPERRAP-p;u|SGLYRSPSMPENLNR-p;u|AVKDRAGSIVLKVLI-p;u|GGVKRSLSEQPVMDT-p;u|QPFQRSISADDDLQE-p;u|ISVSRSTSFRGGMGS-p;u|QRLFRSPSMPCSVIR-p;u|AVVKRMQSLQLDCVA-p;u|SGVKRSRSGEGEVSG-p;u|TALYKSLSVPAASTA-p;u|NHYYRNNSFTAPSTV-p;u|SKLMRSASFNTDPYV-p;u|GGFPRRHSVTLPSSK-p;u|NPLMRRNSVTPLASP-p;u|NNLRRSNSTTQVSQP-p;u|VQNKRRRSVTPPEEQ-p;u|RGLKRSLSEMEIGMV-p;u|FSLLRGPSWDPFRDW-p;u…
KINASE-PSP_CAMK1A/CAMK1	n=12|HDAC5_S498|CDKN1B_T157|CDKN1B_T198|GCM1_S47|EIF4G3_S1156|MYL9_S20|LIPE_S855|CAMK2A_S332|HDAC5_S259|RPS19_S59|HDAC9_S220|HDAC9_S451	11	45.5	45.5	45.5	45.5	45.5	45.5	45.5	45.5	45.5	45.5	36.4	36.4	45.5	45.5	45.5	45.5	45.5	45.5	45.5	45.5	45.5	45.5	36.4	45.5	45.5	45.5	45.5	45.5	45.5	45.5	45.5	45.5	45.5	45.5	45.5	RPLSRTQSSPLPQSP-p;u|KRPQRATSNVFAMFD-p;u|EPMRRSVSEAALAQP-p;u|NTFMRGGSSKDLLDN-p;u|FPLRKTASEPNLKVR-p;u	KRPQRATSNVFAMFD-p;u|NTFMRGGSSKDLLDN-p;u|FPLRKTASEPNLKVR-p;u|RPLSRTQSSPLPQSP-p;u|EPMRRSVSEAALAQP-p;u	FPLRKTASEPNLKVR-p;u|RPLSRTQSSPLPQSP-p;u|NTFMRGGSSKDLLDN-p;u|KRPQRATSNVFAMFD-p;u|EPMRRSVSEAALAQP-p;u	EPMRRSVSEAALAQP-p;u|FPLRKTASEPNLKVR-p;u|RPLSRTQSSPLPQSP-p;u|KRPQRATSNVFAMFD-p;u|NTFMRGGSSKDLLDN-p;u	FPLRKTASEPNLKVR-p;u|KRPQRATSNVFAMFD-p;u|EPMRRSVSEAALAQP-p;u|RPLSRTQSSPLPQSP-p;u|NTFMRGGSSKDLLDN-p;u	FPLRKTASEPNLKVR-p;u|RPLSRTQSSPLPQSP-p;u|EPMRRSVSEAALAQP-p;u|NTFMRGGSSKDLLDN-p;u|KRPQRATSNVFAMFD-p;u	RPLSRTQSSPLPQSP-p;u|FPLRKTASEPNLKVR-p;u|NTFMRGGSSKDLLDN-p;u|KRPQRATSNVFAMFD-p;u|EPMRRSVSEAALAQP-p;u	KRPQRATSNVFAMFD-p;u|EPMRRSVSEAALAQP-p;u|FPLRKTASEPNLKVR-p;u|NTFMRGGSSKDLLDN-p;u|RPLSRTQSSPLPQSP-p;u	FPLRKTASEPNLKVR-p;u|EPMRRSVSEAALAQP-p;u|RPLSRTQSSPLPQSP-p;u|KRPQRATSNVFAMFD-p;u|NTFMRGGSSKDLLDN-p;u	FPLRKTASEPNLKVR-p;u|NTFMRGGSSKDLLDN-p;u|EPMRRSVSEAALAQP-p;u|KRPQRATSNVFAMFD-p;u|RPLSRTQSSPLPQSP-p;u	NTFMRGGSSKDLLDN-p;u|FPLRKTASEPNLKVR-p;u|EPMRRSVSEAALAQP-p;u|KRPQRATSNVFAMFD-p;u	NTFMRGGSSKDLLDN-p;u|FPLRKTASEPNLKVR-p;u|EPMRRSVSEAALAQP-p;u|KRPQRATSNVFAMFD-p;u
KINASE-PSP_MELK	n=25|MELK_Y367|CDC25B_S169|EIF4B_S406|MELK_T539|MELK_T387|MELK_T494|MELK_S505|MELK_S407|MELK_S431|MELK_T398|MELK_T167|MELK_S171|CDC25B_S323|MELK_S405|MELK_S336|MELK_S343|MELK_S391|MELK_T409|EIF4B_S422|MELK_Y163|MELK_S356|MELK_S253|MELK_Y438|MELK_S529|MELK_T56	25	32	32	28	32	32	32	28	32	32	32	28	32	32	28	28	32	32	32	32	28	28	28	32	28	32	28	32	32	32	28	28	28	32	32	32	RPRERHPSWRSEETQ-p;u|PVRLRLSSFSCGQAS-p;u|RERSRTGSESSQTGT-p;u|QRLFRSPSMPCSVIR-p;u|SPERRCRSVELDLNQ-p;u|KGAKVFGSLERGLDK-p;u|GVESKSLTPALCRTP-p;u|DIKSNNWSLEDVTAS-p;u	PVRLRLSSFSCGQAS-p;u|GVESKSLTPALCRTP-p;u|QRLFRSPSMPCSVIR-p;u|SPERRCRSVELDLNQ-p;u|DIKSNNWSLEDVTAS-p;u|KGAKVFGSLERGLDK-p;u|RPRERHPSWRSEETQ-p;u|RERSRTGSESSQTGT-p;u	KGAKVFGSLERGLDK-p;u|SPERRCRSVELDLNQ-p;u|RERSRTGSESSQTGT-p;u|PVRLRLSSFSCGQAS-p;u|DIKSNNWSLEDVTAS-p;u|RPRERHPSWRSEETQ-p;u|GVESKSLTPALCRTP-p;u	RPRERHPSWRSEETQ-p;u|GVESKSLTPALCRTP-p;u|KGAKVFGSLERGLDK-p;u|SPERRCRSVELDLNQ-p;u|RERSRTGSESSQTGT-p;u|PVRLRLSSFSCGQAS-p;u|DIKSNNWSLEDVTAS-p;u|QRLFRSPSMPCSVIR-p;u	RPRERHPSWRSEETQ-p;u|RERSRTGSESSQTGT-p;u|PVRLRLSSFSCGQAS-p;u|GVESKSLTPALCRTP-p;u|SPERRCRSVELDLNQ-p;u|DIKSNNWSLEDVTAS-p;u|KGAKVFGSLERGLDK-p;u|QRLFRSPSMPCSVIR-p;u	RERSRTGSESSQTGT-p;u|RPRERHPSWRSEETQ-p;u|PVRLRLSSFSCGQAS-p;u|DIKSNNWSLEDVTAS-p;u|SPERRCRSVELDLNQ-p;u|KGAKVFGSLERGLDK-p;u|GVESKSLTPALCRTP-p;u|QRLFRSPSMPCSVIR-p;u	RPRERHPSWRSEETQ-p;u|PVRLRLSSFSCGQAS-p;u|RERSRTGSESSQTGT-p;u|SPERRCRSVELDLNQ-p;u|KGAKVFGSLERGLDK-p;u|DIKSNNWSLEDVTAS-p;u|QRLFRSPSMPCSVIR-p;u	RPRERHPSWRSEETQ-p;u|PVRLRLSSFSCGQAS-p;u|QRLFRSPSMPCSVIR-p;u|RERSRTGSESSQTGT-p;u|KGAKVFGSLERGLDK-p;u|SPERRCRSVELDLNQ-p;u|GVESKSLTPALCRTP-p;u|DIKSNNWSLEDVTAS-p;u	RPRERHPSWRSEETQ-p;u|PVRLRLSSFSCGQAS-p;u|SPERRCRSVELDLNQ-p;u|RERSRTGSESSQTGT-p;u|DIKSNNWSLEDVTAS-p;u|KGAKVFGSLERGLDK-p;u|GVESKSLTPALCRTP-p;u|QRLFRSPSMPCSVIR-p;u	RERSRTGSESSQTGT-p;u|RPRERHPSWRSEETQ-p;u|GVESKSLTPALCRTP-p;u|PVRLRLSSFSCGQAS-p;u|KGAKVFGSLERGLDK-p;u|SPERRCRSVELDLNQ-p;u|DIKSNNWSLEDVTAS-p;u|QRLFRSPSMPCSVIR-p;u	RPRERHPSWRSEETQ-p;u|RERSRTGSESSQTGT-p;u|PVRLRLSSFSCGQAS-p;u|DIKSNNWSLEDVTAS-p;u|SPERRCRSVELDLNQ-p;u|KGAKVFGSLERGLDK-p;u|QRLFRSPSMPCSVIR-p;u	RPRERHPSWRSEETQ-p;u|QRLFRSPSMPCSVIR-p;u|SPERRCRSVELDLNQ-p;u|PVRLRLSSFSCGQAS-p;u|GVESKSLTPALCRTP-p;u|DIKSNNWSLEDVTAS-p;u|KGAKVFGSLERGLDK-p;u|RERSRTGSESSQTGT-p;u
KINASE-PSP_IKKB/IKBKB	n=54|CYLD_S432|DOK1_S446|CYLD_S441|RELA_S131|RELA_S45|TP63_S51|NFKB1_S923|RELA_S261|DOK1_S439|NFKBIA_S36|IRF3_T404|FOS_S308|RELB_S472|TP63_S43|TSC1_S487|TNFRSF1A_S381|CDKN2A_S8|IRF3_S396|IKBKG_S31|CYLD_S439|RAPGEF2_S1254|MTURN_S58|CYLD_S436|CYLD_S444|IRF3_S398|IKBKG_S43|CYLD_S422|IKBKG_S68|BBC3_S10|RELA_S536|IRS1_S312|RELA_S468|DOK1_S450|PFKFB3_S269|BCL3_S454|TSC1_S511|RPS3_S209|IRF3_S402|IKBKG_S…	54	7.4	9.3	7.4	9.3	9.3	9.3	7.4	3.7	9.3	5.6	7.4	9.3	9.3	9.3	9.3	9.3	9.3	7.4	9.3	9.3	7.4	9.3	9.3	9.3	9.3	7.4	5.6	7.4	7.4	7.4	9.3	9.3	7.4	9.3	9.3	DGATNNLSRSNSDES-p;u|KPLPDHVSIVEPKDE-p;u|DSIRLQISNPDLKDR-p;u|TESITATSPASMVGG-p;u	DSIRLQISNPDLKDR-p;u|TESITATSPASMVGG-p;u|DGATNNLSRSNSDES-p;u|PPAPAYLSSPLALPS-p;u|KPLPDHVSIVEPKDE-p;u	DGATNNLSRSNSDES-p;u|KPLPDHVSIVEPKDE-p;u|DSIRLQISNPDLKDR-p;u|TESITATSPASMVGG-p;u	KPLPDHVSIVEPKDE-p;u|DSIRLQISNPDLKDR-p;u|DGATNNLSRSNSDES-p;u|PPAPAYLSSPLALPS-p;u|TESITATSPASMVGG-p;u	DSIRLQISNPDLKDR-p;u|DGATNNLSRSNSDES-p;u|PPAPAYLSSPLALPS-p;u|KPLPDHVSIVEPKDE-p;u|TESITATSPASMVGG-p;u	DGATNNLSRSNSDES-p;u|PPAPAYLSSPLALPS-p;u|DSIRLQISNPDLKDR-p;u|TESITATSPASMVGG-p;u|KPLPDHVSIVEPKDE-p;u	DGATNNLSRSNSDES-p;u|KPLPDHVSIVEPKDE-p;u|DSIRLQISNPDLKDR-p;u|TESITATSPASMVGG-p;u	KPLPDHVSIVEPKDE-p;u|DSIRLQISNPDLKDR-p;u	TESITATSPASMVGG-p;u|DSIRLQISNPDLKDR-p;u|DGATNNLSRSNSDES-p;u|PPAPAYLSSPLALPS-p;u|KPLPDHVSIVEPKDE-p;u	KPLPDHVSIVEPKDE-p;u|DSIRLQISNPDLKDR-p;u|TESITATSPASMVGG-p;u	DGATNNLSRSNSDES-p;u|KPLPDHVSIVEPKDE-p;u|DSIRLQISNPDLKDR-p;u|TESITATSPASMVGG-p;u	KPLPDHVSIVEPKDE-p;u|TESITATSPASMVGG-p;u|DGATNNLSRSNSDES-p;u|PPAPAYLSSPLALPS-p;u|DSIRLQISNPDLKDR-p;u
KINASE-PSP_AMPKA1/PRKAA1	n=107|PRKAB1_S108|MAPT_T231|ATG9A_S761|NET1_S100|FH_S75|PRKAA1_S494|SNX17_S437|HDAC5_S498|GAPDH_S122|GFPT1_S243|NOS3_S1177|VASP_T278|ACACA_S80|PRKAA1_T388|PPP1R3C_S293|JAK1_S518|YAP1_S61|RACK1_T50|PRKAB1_S174|EPM2A_S25|PRKAB1_T158|RRN3_S635|KLC2_S545|YAP1_S94|KPNA2_S105|MAPT_S214|EEF2K_S398|PFKFB2_S466|CFTR_S737|MAPT_S356|NOS3_S633|FOXO3_S626|CDKN1B_T198|GLI1_S408|DDIT3_S30|PRPS2_S180|PPP1R12C_S4…	105	30.5	29.5	28.6	31.4	31.4	29.5	27.6	30.5	32.4	29.5	29.5	30.5	31.4	30.5	31.4	31.4	32.4	31.4	31.4	30.5	27.6	31.4	30.5	30.5	29.5	27.6	29.5	30.5	30.5	27.6	31.4	30.5	30.5	29.5	31.4	ATPQRSGSVSNYRSC-p;u|EPLERRLSLVPDSEQ-p;u|PVRMRRNSFTPLSSS-p;u|KLRRRTFSLTEVRGQ-p;u|RFEALNLSFKNMCKL-p;u|VKLSSKLSAVSLRGI-p;u|QSIPRSASYPCAAPR-p;u|CNLSRVDSTTCLFPV-p;u|LHIRSSMSGLHLVKQ-p;u|IVHVRGDSETDLEAL-p;u|PKIHRSASEPSLNRA-p;u|NPLMRRNSVTPLASP-p;u|DTLPRTPSYSISSTL-p;u|DEITEAKSGTATPQR-p;u|GLMQRSSSFPYTTKG-p;u|QARAKTQTPPVSPAP-p;u|SKLPLTRSHNNFVAI-p;u|GKIHRSATDADVVNS-p;u|RPLARVTSLANLISP-p;u|RPLSRTQSSPLPQSP-p;u…	PVRMRRNSFTPLSSS-p;u|EPLERRLSLVPDSEQ-p;u|LHIRSSMSGLHLVKQ-p;u|VKLSSKLSAVSLRGI-p;u|GLMQRSSSFPYTTKG-p;u|KLRRRTFSLTEVRGQ-p;u|FDFPKTPSSQNLLAL-p;u|QARAKTQTPPVSPAP-p;u|QSIPRSASYPCAAPR-p;u|IVHVRGDSETDLEAL-p;u|ATPQRSGSVSNYRSC-p;u|NPLMRRNSVTPLASP-p;u|DEITEAKSGTATPQR-p;u|RFEALNLSFKNMCKL-p;u|SKLPLTRSHNNFVAI-p;u|GKIHRSATDADVVNS-p;u|DTLPRTPSYSISSTL-p;u|PRLRSVSSYGNIRAV-p;u|AGLQRSASSSWLEGT-p;u|CNLSRVDSTTCLFPV-p;u…	LHIRSSMSGLHLVKQ-p;u|DEITEAKSGTATPQR-p;u|ATPQRSGSVSNYRSC-p;u|CNLSRVDSTTCLFPV-p;u|PRLRSVSSYGNIRAV-p;u|DTLPRTPSYSISSTL-p;u|PVRMRRNSFTPLSSS-p;u|EPLERRLSLVPDSEQ-p;u|KLRRRTFSLTEVRGQ-p;u|FPLRKTASEPNLKVR-p;u|GSLRRSGSFGKLRDA-p;u|VKLSSKLSAVSLRGI-p;u|RFEALNLSFKNMCKL-p;u|PRMKRASSLNFLNKS-p;u|QARAKTQTPPVSPAP-p;u|AFRRRANTLSHFPIE-p;u|PKIHRSASEPSLNRA-p;u|RPLSRTQSSPLPQSP-p;u|QSIPRSASYPCAAPR-p;u|SKLPLTRSHNNFVAI-p;u…	ATPQRSGSVSNYRSC-p;u|PVRMRRNSFTPLSSS-p;u|KLRRRTFSLTEVRGQ-p;u|RPMRKSFSQPGLRSL-p;u|DEITEAKSGTATPQR-p;u|SKLPLTRSHNNFVAI-p;u|AFRRRANTLSHFPIE-p;u|NPLMRRNSVTPLASP-p;u|CNLSRVDSTTCLFPV-p;u|DTLPRTPSYSISSTL-p;u|GLMQRSSSFPYTTKG-p;u|GAEIVYKSPVVSGDT-p;u|LHIRSSMSGLHLVKQ-p;u|PRMKRASSLNFLNKS-p;u|AGLQRSASSSWLEGT-p;u|EPLERRLSLVPDSEQ-p;u|QSIPRSASYPCAAPR-p;u|GSLRRSGSFGKLRDA-p;u|WRRKRKESSNTDSAG-p;u|PKIHRSASEPSLNRA-p;u…	IVHVRGDSETDLEAL-p;u|ATPQRSGSVSNYRSC-p;u|EPLERRLSLVPDSEQ-p;u|RFEALNLSFKNMCKL-p;u|DEITEAKSGTATPQR-p;u|FDFPKTPSSQNLLAL-p;u|GLMQRSSSFPYTTKG-p;u|NPLMRRNSVTPLASP-p;u|PVRMRRNSFTPLSSS-p;u|QARAKTQTPPVSPAP-p;u|CNLSRVDSTTCLFPV-p;u|FPLRKTASEPNLKVR-p;u|KLRRRTFSLTEVRGQ-p;u|RPLARVTSLANLISP-p;u|AFRRRANTLSHFPIE-p;u|SKLPLTRSHNNFVAI-p;u|AGLQRSASSSWLEGT-p;u|GSLRRSGSFGKLRDA-p;u|DTLPRTPSYSISSTL-p;u|EPQSRPRSCTWPLQR-p;u…	EPLERRLSLVPDSEQ-p;u|GLMQRSSSFPYTTKG-p;u|NPLMRRNSVTPLASP-p;u|PVRMRRNSFTPLSSS-p;u|ATPQRSGSVSNYRSC-p;u|DEITEAKSGTATPQR-p;u|QARAKTQTPPVSPAP-p;u|CNLSRVDSTTCLFPV-p;u|SKLPLTRSHNNFVAI-p;u|VKLSSKLSAVSLRGI-p;u|PRLRSVSSYGNIRAV-p;u|RFEALNLSFKNMCKL-p;u|PKIHRSASEPSLNRA-p;u|QSIPRSASYPCAAPR-p;u|DTLPRTPSYSISSTL-p;u|KLRRRTFSLTEVRGQ-p;u|ENMEKRRSRESLNVD-p;u|IVHVRGDSETDLEAL-p;u|GKIHRSATDADVVNS-p;u|FPLRKTASEPNLKVR-p;u…	QSIPRSASYPCAAPR-p;u|GKIHRSATDADVVNS-p;u|ATPQRSGSVSNYRSC-p;u|VKLSSKLSAVSLRGI-p;u|DTLPRTPSYSISSTL-p;u|KKVAVVRTPPKSPSS-p;u|NPLMRRNSVTPLASP-p;u|KLRRRTFSLTEVRGQ-p;u|CNLSRVDSTTCLFPV-p;u|LHIRSSMSGLHLVKQ-p;u|PKIHRSASEPSLNRA-p;u|NVKSKIGSTENLKHQ-p;u|SKLPLTRSHNNFVAI-p;u|GLMQRSSSFPYTTKG-p;u|PRLRSVSSYGNIRAV-p;u|RPLSRTQSSPLPQSP-p;u|AGLQRSASSSWLEGT-p;u|RFEALNLSFKNMCKL-p;u|FPLRKTASEPNLKVR-p;u|EPLERRLSLVPDSEQ-p;u…	EPLERRLSLVPDSEQ-p;u|DTLPRTPSYSISSTL-p;u|GKIHRSATDADVVNS-p;u|QSIPRSASYPCAAPR-p;u|ATPQRSGSVSNYRSC-p;u|VKLSSKLSAVSLRGI-p;u|PVRMRRNSFTPLSSS-p;u|LHIRSSMSGLHLVKQ-p;u|GLMQRSSSFPYTTKG-p;u|SKLPLTRSHNNFVAI-p;u|CNLSRVDSTTCLFPV-p;u|AGLQRSASSSWLEGT-p;u|NPLMRRNSVTPLASP-p;u|PRLRSVSSYGNIRAV-p;u|KLRRRTFSLTEVRGQ-p;u|DEITEAKSGTATPQR-p;u|WRRKRKESSNTDSAG-p;u|RPLARVTSLANLISP-p;u|IVHVRGDSETDLEAL-p;u|QARAKTQTPPVSPAP-p;u…	IVHVRGDSETDLEAL-p;u|RPMRKSFSQPGLRSL-p;u|PVRMRRNSFTPLSSS-p;u|PRLRSVSSYGNIRAV-p;u|FPLRKTASEPNLKVR-p;u|ENMEKRRSRESLNVD-p;u|KLRRRTFSLTEVRGQ-p;u|QARAKTQTPPVSPAP-p;u|PRMKRASSLNFLNKS-p;u|SKLPLTRSHNNFVAI-p;u|DEITEAKSGTATPQR-p;u|ATPQRSGSVSNYRSC-p;u|GSLRRSGSFGKLRDA-p;u|PKIHRSASEPSLNRA-p;u|NPLMRRNSVTPLASP-p;u|CNLSRVDSTTCLFPV-p;u|EPLERRLSLVPDSEQ-p;u|DTLPRTPSYSISSTL-p;u|WRRKRKESSNTDSAG-p;u|GKIHRSATDADVVNS-p;u…	PVRMRRNSFTPLSSS-p;u|GKIHRSATDADVVNS-p;u|VKLSSKLSAVSLRGI-p;u|FPLRKTASEPNLKVR-p;u|CNLSRVDSTTCLFPV-p;u|ATPQRSGSVSNYRSC-p;u|LHIRSSMSGLHLVKQ-p;u|SKLPLTRSHNNFVAI-p;u|PRLRSVSSYGNIRAV-p;u|GLMQRSSSFPYTTKG-p;u|QSIPRSASYPCAAPR-p;u|QARAKTQTPPVSPAP-p;u|DTLPRTPSYSISSTL-p;u|AGLQRSASSSWLEGT-p;u|AFRRRANTLSHFPIE-p;u|EPLERRLSLVPDSEQ-p;u|NPLMRRNSVTPLASP-p;u|DEITEAKSGTATPQR-p;u|KLRRRTFSLTEVRGQ-p;u|GAEIVYKSPVVSGDT-p;u…	VKLSSKLSAVSLRGI-p;u|ATPQRSGSVSNYRSC-p;u|QSIPRSASYPCAAPR-p;u|SKLPLTRSHNNFVAI-p;u|EPLERRLSLVPDSEQ-p;u|PRLRSVSSYGNIRAV-p;u|CNLSRVDSTTCLFPV-p;u|PVRMRRNSFTPLSSS-p;u|DEITEAKSGTATPQR-p;u|DTLPRTPSYSISSTL-p;u|NPLMRRNSVTPLASP-p;u|GKIHRSATDADVVNS-p;u|QARAKTQTPPVSPAP-p;u|LHIRSSMSGLHLVKQ-p;u|GLMQRSSSFPYTTKG-p;u|AGLQRSASSSWLEGT-p;u|WRRKRKESSNTDSAG-p;u|RPLARVTSLANLISP-p;u|PKIHRSASEPSLNRA-p;u|GSLRRSGSFGKLRDA-p;u…	LHIRSSMSGLHLVKQ-p;u|CNLSRVDSTTCLFPV-p;u|EPMRRSVSEAALAQP-p;u|ATPQRSGSVSNYRSC-p;u|QARAKTQTPPVSPAP-p;u|PVRMRRNSFTPLSSS-p;u|FDFPKTPSSQNLLAL-p;u|IVHVRGDSETDLEAL-p;u|DEITEAKSGTATPQR-p;u|SKLPLTRSHNNFVAI-p;u|GLMQRSSSFPYTTKG-p;u|AGLQRSASSSWLEGT-p;u|VKLSSKLSAVSLRGI-p;u|WRRKRKESSNTDSAG-p;u|EPLERRLSLVPDSEQ-p;u|PRLRSVSSYGNIRAV-p;u|FPLRKTASEPNLKVR-p;u|KLRRRTFSLTEVRGQ-p;u|RPLARVTSLANLISP-p;u|GKIHRSATDADVVNS-p;u…
KINASE-PSP_P70S6KB/RPS6KB2	n=8|TARBP2_S283|HSPB1_S78|GSK3B_S9|KRT18_S53|EEF2K_S366|HNRNPA1_S6|RICTOR_T1135|HSPB1_S82	8	62.5	62.5	50	62.5	62.5	62.5	50	62.5	62.5	50	62.5	62.5	62.5	50	62.5	62.5	62.5	50	62.5	62.5	50	62.5	62.5	50	62.5	50	50	62.5	50	50	62.5	50	62.5	62.5	62.5	SGRPRTTSFAESCKP-p;u|ISVSRSTSFRGGMGS-p;u|SPQVRTLSGSRPPLL-p;u|__MSKSESPKEPEQL-p;u|RALSRQLSSGVSEIR-p;u	ISVSRSTSFRGGMGS-p;u|SGRPRTTSFAESCKP-p;u|RALSRQLSSGVSEIR-p;u|__MSKSESPKEPEQL-p;u|SPQVRTLSGSRPPLL-p;u	RALSRQLSSGVSEIR-p;u|SGRPRTTSFAESCKP-p;u|ISVSRSTSFRGGMGS-p;u|__MSKSESPKEPEQL-p;u	SGRPRTTSFAESCKP-p;u|ISVSRSTSFRGGMGS-p;u|__MSKSESPKEPEQL-p;u|SPQVRTLSGSRPPLL-p;u|RALSRQLSSGVSEIR-p;u	SGRPRTTSFAESCKP-p;u|__MSKSESPKEPEQL-p;u|ISVSRSTSFRGGMGS-p;u|SPQVRTLSGSRPPLL-p;u|RALSRQLSSGVSEIR-p;u	ISVSRSTSFRGGMGS-p;u|__MSKSESPKEPEQL-p;u|SGRPRTTSFAESCKP-p;u|SPQVRTLSGSRPPLL-p;u|RALSRQLSSGVSEIR-p;u	RALSRQLSSGVSEIR-p;u|SGRPRTTSFAESCKP-p;u|ISVSRSTSFRGGMGS-p;u|__MSKSESPKEPEQL-p;u	ISVSRSTSFRGGMGS-p;u|RALSRQLSSGVSEIR-p;u|__MSKSESPKEPEQL-p;u|SGRPRTTSFAESCKP-p;u|SPQVRTLSGSRPPLL-p;u	ISVSRSTSFRGGMGS-p;u|RALSRQLSSGVSEIR-p;u|SPQVRTLSGSRPPLL-p;u|__MSKSESPKEPEQL-p;u|SGRPRTTSFAESCKP-p;u	RALSRQLSSGVSEIR-p;u|SGRPRTTSFAESCKP-p;u|ISVSRSTSFRGGMGS-p;u|__MSKSESPKEPEQL-p;u	RALSRQLSSGVSEIR-p;u|ISVSRSTSFRGGMGS-p;u|__MSKSESPKEPEQL-p;u|SGRPRTTSFAESCKP-p;u|SPQVRTLSGSRPPLL-p;u	SGRPRTTSFAESCKP-p;u|SPQVRTLSGSRPPLL-p;u|ISVSRSTSFRGGMGS-p;u|__MSKSESPKEPEQL-p;u|RALSRQLSSGVSEIR-p;u
KINASE-PSP_ERK2/MAPK1	n=367|SLC9A1_T779|TOP2A_S1361|PITPNM1_T794|BRAF_T401|SREBF1_T81|ERBB2_T701|MAPT_T231|EIF4EBP1_S65|SLC9A1_S726|CEBPA_S21|NOX5_S498|ERF_T526|NUP153_S516|NUP153_T388|MAPT_S202|DUSP5_S376|SNAI1_S104|IRS1_S636|APBB1_T709|PXN_S83|NUP153_S257|PKM_S37|RPS6KA1_T573|PXN_S130|EP300_S2315|MAPT_S199|CDKN1A_S130|TH_S58|SPHK1_S225|ATF2_T71|RPS6KB1_S447|BAD_S75|NDEL1_T245|PDE4B_S659|GORASP2_T222|RXRA_S260|NUP153…	362	33.7	32.3	33.7	33.4	32.3	32.3	33.1	32.3	32.9	33.1	32.3	32.3	33.4	33.4	32.6	33.4	32.9	34.3	32.3	33.1	33.1	32.6	32.3	33.4	32.3	33.1	33.1	33.7	33.1	33.1	32.6	33.4	33.7	31.5	32.3	KVAAETQSPSLFGST-p;u|AENGLLMTPCYTANF-p;u|QSVDKVTSPTKV___-p;u|EEEDGTGSPQLNNR_-p;u|SSSSPPGTPSPADAK-p;u|VKVNGDASPAAAESG-p;u|KTQTPPVSPAPQPTE-p;u|SGDYMPMSPKSVSAP-p;u|DGPQLPTSPRLTAAA-p;u|YACASPKTPIQAGGY-p;u|GEAGGPLTPRRVSSD-p;u|NVRVSNGSPSLERMD-p;u|GQLVGLNSPNSILKA-p;u|PELCGPGSPPVLTPG-p;u|GLFNELASPFENEFK-p;u|TEERLPSSPVYEDAA-p;u|FLMECRNSPVTKTPP-p;u|VPAHKLDSPTMSRAR-p;u|TNKVQMTSPSSTGSP-p;u|IDQGDLMTPQFTPYY-p;u…	SSSLGRVSPPPPSDT-p;u|LVEKLPDSPALAKKA-p;u|RQPSPSPSPTERAPA-p;u|PSEGRQPSPSPSPTE-p;u|RELVEPLTPSGEAPN-p;u|EGRQPSPSPSPTERA-p;u|PHLDGPPSPRSPVIG-p;u|TEERLPSSPVYEDAA-p;u|DGPPSPRSPVIGSEV-p;u|LPGQMAGTPITPLKD-p;u|TEMDPTYSPAALPQS-p;u|QEQECPPSPEPTRKE-p;u|KPFPAPQTPGRLQPA-p;u|APRSAPPSPPFPPPP-p;u|DSLDSRLSPPAGLFT-p;u|QMAGTPITPLKDGFT-p;u|CADVPLLTPSSKEMM-p;u|SGDYMPMSPKSVSAP-p;u|TNKVQMTSPSSTGSP-p;u|SGEQAEGSPGGPGDS-p;u…	PTQALPASPALKNKR-p;u|EEQDRPRSPTGPSNS-p;u|QSPKRPRSPGSNSKV-p;u|ARLGSQHSPGRTASL-p;u|PELCGPGSPPVLTPG-p;u|IDQGDLMTPQFTPYY-p;u|YFAKALESPERPFLA-p;u|DSLDSRLSPPAGLFT-p;u|RRDYDDMSPRRGPPP-p;u|RFIGSPRTPVSPVKF-p;u|PPTQKPPSPPMSGRG-p;u|TSPSSTGSPMFKFSS-p;u|TNKVQMTSPSSTGSP-p;u|PASPAPLSPLEVELD-p;u|PIPIMPASPQKGHAV-p;u|GSVPLSSSPPATHFP-p;u|LLPTPPLSPSRRSGL-p;u|KKFELLPTPPLSPSR-p;u|QEQECPPSPEPTRKE-p;u|PSDLSPESPMLSSPP-p;u…	AENGLLMTPCYTANF-p;u|KVAAETQSPSLFGST-p;u|TNKVQMTSPSSTGSP-p;u|TEMDPTYSPAALPQS-p;u|VPAHKLDSPTMSRAR-p;u|GDRSGYSSPGSPGTP-p;u|YFAKALESPERPFLA-p;u|IDQGDLMTPQFTPYY-p;u|DGPQLPTSPRLTAAA-p;u|TELVEPLTPSGAMPN-p;u|PHLDGPPSPRSPVIG-p;u|PELCGPGSPPVLTPG-p;u|GLFNELASPFENEFK-p;u|FTPAPSDSPSSQRIQ-p;u|LPGQMAGTPITPLKD-p;u|KPFPAPQTPGRLQPA-p;u|TSPSSTGSPMFKFSS-p;u|PVVSGDTSPRHLSNV-p;u|GQLVGLNSPNSILKA-p;u|FLMECRNSPVTKTPP-p;u…	EEEDGTGSPQLNNR_-p;u|AENGLLMTPCYTANF-p;u|TEMDPTYSPAALPQS-p;u|ARLGSQHSPGRTASL-p;u|RELVEPLTPSGEAPN-p;u|KPFPAPQTPGRLQPA-p;u|SSSSPPGTPSPADAK-p;u|VPNDYMTSPARLGSQ-p;u|DGPQLPTSPRLTAAA-p;u|YFAKALESPERPFLA-p;u|KVAAETQSPSLFGST-p;u|TNKVQMTSPSSTGSP-p;u|KNENTEGSPQEDGVE-p;u|ANRTPPKSPGDPSKD-p;u|TEERLPSSPVYEDAA-p;u|PPTQKPPSPPMSGRG-p;u|IDQGDLMTPQFTPYY-p;u|GEAGGPLTPRRVSSD-p;u|TELVEPLTPSGAMPN-p;u|KTQTPPVSPAPQPTE-p;u…	TNKVQMTSPSSTGSP-p;u|AIKVEPASPPYYSEK-p;u|EENVSDGSPNAGSVE-p;u|NVRVSNGSPSLERMD-p;u|KVAAETQSPSLFGST-p;u|PELCGPGSPPVLTPG-p;u|RRDYDDMSPRRGPPP-p;u|AENGLLMTPCYTANF-p;u|TELVEPLTPSGAMPN-p;u|EGRQPSPSPSPTERA-p;u|TEMDPTYSPAALPQS-p;u|QLSKWPGSPTSRSSD-p;u|PHLDGPPSPRSPVIG-p;u|KTQTPPVSPAPQPTE-p;u|IVSSPLNSPLDRSGI-p;u|VKVNGDASPAAAESG-p;u|TEERLPSSPVYEDAA-p;u|RQPSPSPSPTERAPA-p;u|KPFPAPQTPGRLQPA-p;u|VPAHKLDSPTMSRAR-p;u…	TPGSRSRTPSLPTPP-p;u|VKVNGDASPAAAESG-p;u|ANRTPPKSPGDPSKD-p;u|PGVELLLTPREPALP-p;u|VVRTPPKSPSSAKSR-p;u|PSDLSPESPMLSSPP-p;u|GVTKAISSPTVSRLT-p;u|QSTKVPQTPLHTSRV-p;u|KKVAVVRTPPKSPSS-p;u|KPFPAPQTPGRLQPA-p;u|ESAPAESSPSKIMSK-p;u|IDQGDLMTPQFTPYY-p;u|PVVSGDTSPRHLSNV-p;u|ARLGSQHSPGRTASL-p;u|GEAGGPLTPRRVSSD-p;u|AENGLLMTPCYTANF-p;u|GDRSGYSSPGSPGTP-p;u|KTPPAPKTPPSSGEP-p;u|EEEDGTGSPQLNNR_-p;u|SGYSSPGSPGTPGSR-p;u…	YFAKALESPERPFLA-p;u|SSSSPPGTPSPADAK-p;u|VPAHKLDSPTMSRAR-p;u|TNKVQMTSPSSTGSP-p;u|FTPAPSDSPSSQRIQ-p;u|FLMECRNSPVTKTPP-p;u|IDQGDLMTPQFTPYY-p;u|KPFPAPQTPGRLQPA-p;u|PHLDGPPSPRSPVIG-p;u|AENGLLMTPCYTANF-p;u|AIKVEPASPPYYSEK-p;u|KVAAETQSPSLFGST-p;u|PASPAPLSPLEVELD-p;u|GEAGGPLTPRRVSSD-p;u|EIRSRHSSYPAGTED-p;u|PATVEPASPTPAHSL-p;u|TGSTPPVSPTPSERS-p;u|PGVELLLTPREPALP-p;u|TEERLPSSPVYEDAA-p;u|TIKQEPVSPKKKENA-p;u…	QSPKRPRSPGSNSKV-p;u|SGDYMPMSPKSVSAP-p;u|DGPQLPTSPRLTAAA-p;u|TNKVQMTSPSSTGSP-p;u|VPAHKLDSPTMSRAR-p;u|MCRLDIDSPPITARN-p;u|RELVEPLTPSGEAPN-p;u|ANRTPPKSPGDPSKD-p;u|TSPSSTGSPMFKFSS-p;u|FTPAPSDSPSSQRIQ-p;u|KVAAETQSPSLFGST-p;u|GVTKAISSPTVSRLT-p;u|IDQGDLMTPQFTPYY-p;u|PHLDGPPSPRSPVIG-p;u|TEMDPTYSPAALPQS-p;u|EIRSRHSSYPAGTED-p;u|KTQTPPVSPAPQPTE-p;u|KNENTEGSPQEDGVE-p;u|PASPAPLSPLEVELD-p;u|PIPIMPASPQKGHAV-p;u…	QSPKRPRSPGSNSKV-p;u|FLMECRNSPVTKTPP-p;u|SSSSPPGTPSPADAK-p;u|TEERLPSSPVYEDAA-p;u|VPAHKLDSPTMSRAR-p;u|PGVELLLTPREPALP-p;u|LPGQMAGTPITPLKD-p;u|TNKVQMTSPSSTGSP-p;u|TELVEPLTPSGAMPN-p;u|MCRLDIDSPPITARN-p;u|RQPSPSPSPTERAPA-p;u|PHLDGPPSPRSPVIG-p;u|FTPAPSDSPSSQRIQ-p;u|DTRQIQPSPPWSYDQ-p;u|EGRQPSPSPSPTERA-p;u|IDQGDLMTPQFTPYY-p;u|KTQTPPVSPAPQPTE-p;u|PSEGRQPSPSPSPTE-p;u|PATVEPASPTPAHSL-p;u|EAALPPVSPLKAALS-p;u…	DSLDSRLSPPAGLFT-p;u|ANRTPPKSPGDPSKD-p;u|PELCGPGSPPVLTPG-p;u|TEERLPSSPVYEDAA-p;u|VKVNGDASPAAAESG-p;u|SSSSPPGTPSPADAK-p;u|PPTQKPPSPPMSGRG-p;u|KTQTPPVSPAPQPTE-p;u|GVTKAISSPTVSRLT-p;u|QEQECPPSPEPTRKE-p;u|PHLDGPPSPRSPVIG-p;u|IDQGDLMTPQFTPYY-p;u|DGPQLPTSPRLTAAA-p;u|LPGQMAGTPITPLKD-p;u|TELVEPLTPSGAMPN-p;u|IGLNQPSTPTHAAGV-p;u|SFPNKQKSAEPSPTV-p;u|RQPSPSPSPTERAPA-p;u|PGVELLLTPREPALP-p;u|RELVEPLTPSGEAPN-p;u…	ANRTPPKSPGDPSKD-p;u|GVTKAISSPTVSRLT-p;u|AENGLLMTPCYTANF-p;u|AIKVEPASPPYYSEK-p;u|TEERLPSSPVYEDAA-p;u|TNKVQMTSPSSTGSP-p;u|PGVELLLTPREPALP-p;u|QEQECPPSPEPTRKE-p;u|GEAGGPLTPRRVSSD-p;u|LVEKLPDSPALAKKA-p;u|KPFPAPQTPGRLQPA-p;u|SGDYMPMSPKSVSAP-p;u|YQSTIPQSPSPAPDD-p;u|YLKRPPESPPIVEEW-p;u|VKVNGDASPAAAESG-p;u|ARLGSQHSPGRTASL-p;u|TEMDPTYSPAALPQS-p;u|RRDYDDMSPRRGPPP-p;u|IDQGDLMTPQFTPYY-p;u|DDRQIVDTPPHVAAG-p;u…
KINASE-PSP_KIS/UHMK1	n=5|SF1_S80|PIMREG_S131|CDKN1B_S10|STMN1_S38|SF1_S82	5	100	100	100	100	100	100	100	100	100	100	100	100	100	100	100	100	100	100	100	100	100	100	100	100	100	100	100	100	100	100	100	100	100	100	100	NVRVSNGSPSLERMD-p;u|PPNPEDRSPSPEPIY-p;u|SVPEFPLSPPKKKDL-p;u|NPEDRSPSPEPIYNS-p;u|GAQKGSGSPTHSLSQ-p;u	SVPEFPLSPPKKKDL-p;u|PPNPEDRSPSPEPIY-p;u|NPEDRSPSPEPIYNS-p;u|GAQKGSGSPTHSLSQ-p;u|NVRVSNGSPSLERMD-p;u	GAQKGSGSPTHSLSQ-p;u|NPEDRSPSPEPIYNS-p;u|SVPEFPLSPPKKKDL-p;u|PPNPEDRSPSPEPIY-p;u|NVRVSNGSPSLERMD-p;u	GAQKGSGSPTHSLSQ-p;u|SVPEFPLSPPKKKDL-p;u|NVRVSNGSPSLERMD-p;u|PPNPEDRSPSPEPIY-p;u|NPEDRSPSPEPIYNS-p;u	NPEDRSPSPEPIYNS-p;u|NVRVSNGSPSLERMD-p;u|PPNPEDRSPSPEPIY-p;u|GAQKGSGSPTHSLSQ-p;u|SVPEFPLSPPKKKDL-p;u	NVRVSNGSPSLERMD-p;u|NPEDRSPSPEPIYNS-p;u|PPNPEDRSPSPEPIY-p;u|SVPEFPLSPPKKKDL-p;u|GAQKGSGSPTHSLSQ-p;u	GAQKGSGSPTHSLSQ-p;u|SVPEFPLSPPKKKDL-p;u|NVRVSNGSPSLERMD-p;u|PPNPEDRSPSPEPIY-p;u|NPEDRSPSPEPIYNS-p;u	NPEDRSPSPEPIYNS-p;u|PPNPEDRSPSPEPIY-p;u|NVRVSNGSPSLERMD-p;u|SVPEFPLSPPKKKDL-p;u|GAQKGSGSPTHSLSQ-p;u	GAQKGSGSPTHSLSQ-p;u|SVPEFPLSPPKKKDL-p;u|PPNPEDRSPSPEPIY-p;u|NPEDRSPSPEPIYNS-p;u|NVRVSNGSPSLERMD-p;u	NPEDRSPSPEPIYNS-p;u|NVRVSNGSPSLERMD-p;u|PPNPEDRSPSPEPIY-p;u|GAQKGSGSPTHSLSQ-p;u|SVPEFPLSPPKKKDL-p;u	PPNPEDRSPSPEPIY-p;u|NPEDRSPSPEPIYNS-p;u|NVRVSNGSPSLERMD-p;u|SVPEFPLSPPKKKDL-p;u|GAQKGSGSPTHSLSQ-p;u	PPNPEDRSPSPEPIY-p;u|NPEDRSPSPEPIYNS-p;u|SVPEFPLSPPKKKDL-p;u|GAQKGSGSPTHSLSQ-p;u|NVRVSNGSPSLERMD-p;u
KINASE-PSP_CAMK2A	n=83|HDAC5_S259|AKAP5_S92|HRH1_T142|SMAD2_S240|ETS2_S310|ITPKA_T311|NCOR2_S2426|KCNJ11_T180|CAMK2A_T306|FBXO43_T234|RRAD_S273|ITGB1_T788|TH_S35|TH_S44|RCHY1_T154|ETS2_S313|TCAP_S157|STMN1_S16|SLN_T5|CAMK2A_T286|CHAT_T456|CAMK2A_T305|ETS1_S285|TH_S19|SPR_S213|SLC1A3_T26|NCOR2_S2453|OPRM1_S268|KIF3A_S687|SMAD2_S260|TH_S19|CDKN1B_S10|SRF_S103|DAGLA_S782|CARD11_S116|AKAP5_T87|RYR2_S2814|HDAC5_S498|SL…	80	18.8	18.8	17.5	18.8	18.8	18.8	17.5	17.5	18.8	17.5	17.5	18.8	18.8	17.5	18.8	18.8	18.8	17.5	18.8	17.5	17.5	18.8	18.8	17.5	18.8	17.5	17.5	18.8	17.5	17.5	18.8	17.5	18.8	17.5	18.8	PSLEPQKSLGDEGLN-p;u|CNLSRVDSTTCLFPV-p;u|NVRVSNGSPSLERMD-p;u|KTGRRKRSAKPETVI-p;u|VWEDRPSSAGSTPFP-p;u|QDTQRRTSMGGTQQQ-p;u|RPLSRTQSSPLPQSP-p;u|KELEKRASGQAFELI-p;u|RGLKRSLSEMEIGMV-p;u|GVRLLQDSVDFSLAD-p;u|LDVQRVPSFESFEDD-p;u|FPLRKTASEPNLKVR-p;u|LNGEASKSQEMVHLV-p;u|NSLQRVPSYDSFDSE-p;u|NVKSKIGSTENLKHQ-p;u	QRVPSYDSFDSEDYP-p;u|NSLQRVPSYDSFDSE-p;u|PSLEPQKSLGDEGLN-p;u|KELEKRASGQAFELI-p;u|LDVQRVPSFESFEDD-p;u|KTGRRKRSAKPETVI-p;u|QRVPSFESFEDDCSQ-p;u|VWEDRPSSAGSTPFP-p;u|NVRVSNGSPSLERMD-p;u|QDTQRRTSMGGTQQQ-p;u|LNGEASKSQEMVHLV-p;u|CNLSRVDSTTCLFPV-p;u|FPLRKTASEPNLKVR-p;u|RPLSRTQSSPLPQSP-p;u|NVKSKIGSTENLKHQ-p;u	LDVQRVPSFESFEDD-p;u|CNLSRVDSTTCLFPV-p;u|FPLRKTASEPNLKVR-p;u|KELEKRASGQAFELI-p;u|QDTQRRTSMGGTQQQ-p;u|PSLEPQKSLGDEGLN-p;u|RPLSRTQSSPLPQSP-p;u|KTGRRKRSAKPETVI-p;u|NVRVSNGSPSLERMD-p;u|GVRLLQDSVDFSLAD-p;u|VWEDRPSSAGSTPFP-p;u|LNGEASKSQEMVHLV-p;u|NSLQRVPSYDSFDSE-p;u|NVKSKIGSTENLKHQ-p;u	PSLEPQKSLGDEGLN-p;u|LNGEASKSQEMVHLV-p;u|CNLSRVDSTTCLFPV-p;u|KTGRRKRSAKPETVI-p;u|QDTQRRTSMGGTQQQ-p;u|LDVQRVPSFESFEDD-p;u|KELEKRASGQAFELI-p;u|NVKSKIGSTENLKHQ-p;u|VWEDRPSSAGSTPFP-p;u|RGLKRSLSEMEIGMV-p;u|FPLRKTASEPNLKVR-p;u|NVRVSNGSPSLERMD-p;u|RPLSRTQSSPLPQSP-p;u|QRVPSYDSFDSEDYP-p;u|NSLQRVPSYDSFDSE-p;u	QDTQRRTSMGGTQQQ-p;u|QRVPSFESFEDDCSQ-p;u|LDVQRVPSFESFEDD-p;u|PSLEPQKSLGDEGLN-p;u|CNLSRVDSTTCLFPV-p;u|FPLRKTASEPNLKVR-p;u|KTGRRKRSAKPETVI-p;u|VWEDRPSSAGSTPFP-p;u|NVRVSNGSPSLERMD-p;u|QRVPSYDSFDSEDYP-p;u|LNGEASKSQEMVHLV-p;u|RPLSRTQSSPLPQSP-p;u|NSLQRVPSYDSFDSE-p;u|KELEKRASGQAFELI-p;u|NVKSKIGSTENLKHQ-p;u	PSLEPQKSLGDEGLN-p;u|NVRVSNGSPSLERMD-p;u|QDTQRRTSMGGTQQQ-p;u|LDVQRVPSFESFEDD-p;u|QRVPSFESFEDDCSQ-p;u|CNLSRVDSTTCLFPV-p;u|LNGEASKSQEMVHLV-p;u|VWEDRPSSAGSTPFP-p;u|KTGRRKRSAKPETVI-p;u|FPLRKTASEPNLKVR-p;u|RPLSRTQSSPLPQSP-p;u|QRVPSYDSFDSEDYP-p;u|NVKSKIGSTENLKHQ-p;u|NSLQRVPSYDSFDSE-p;u|KELEKRASGQAFELI-p;u	CNLSRVDSTTCLFPV-p;u|GVRLLQDSVDFSLAD-p;u|KTGRRKRSAKPETVI-p;u|NVKSKIGSTENLKHQ-p;u|RPLSRTQSSPLPQSP-p;u|FPLRKTASEPNLKVR-p;u|NVRVSNGSPSLERMD-p;u|VWEDRPSSAGSTPFP-p;u|KELEKRASGQAFELI-p;u|PSLEPQKSLGDEGLN-p;u|LDVQRVPSFESFEDD-p;u|QDTQRRTSMGGTQQQ-p;u|QRVPSFESFEDDCSQ-p;u|LNGEASKSQEMVHLV-p;u	LNGEASKSQEMVHLV-p;u|QDTQRRTSMGGTQQQ-p;u|CNLSRVDSTTCLFPV-p;u|KTGRRKRSAKPETVI-p;u|LDVQRVPSFESFEDD-p;u|RGLKRSLSEMEIGMV-p;u|PSLEPQKSLGDEGLN-p;u|NVRVSNGSPSLERMD-p;u|FPLRKTASEPNLKVR-p;u|VWEDRPSSAGSTPFP-p;u|RPLSRTQSSPLPQSP-p;u|NVKSKIGSTENLKHQ-p;u|NSLQRVPSYDSFDSE-p;u|KELEKRASGQAFELI-p;u	FPLRKTASEPNLKVR-p;u|LDVQRVPSFESFEDD-p;u|CNLSRVDSTTCLFPV-p;u|KTGRRKRSAKPETVI-p;u|RGLKRSLSEMEIGMV-p;u|RPLSRTQSSPLPQSP-p;u|LNGEASKSQEMVHLV-p;u|NVRVSNGSPSLERMD-p;u|QRVPSYDSFDSEDYP-p;u|VWEDRPSSAGSTPFP-p;u|KELEKRASGQAFELI-p;u|QDTQRRTSMGGTQQQ-p;u|NSLQRVPSYDSFDSE-p;u|PSLEPQKSLGDEGLN-p;u|NVKSKIGSTENLKHQ-p;u	FPLRKTASEPNLKVR-p;u|CNLSRVDSTTCLFPV-p;u|QDTQRRTSMGGTQQQ-p;u|NVRVSNGSPSLERMD-p;u|VWEDRPSSAGSTPFP-p;u|LDVQRVPSFESFEDD-p;u|KTGRRKRSAKPETVI-p;u|QRVPSFESFEDDCSQ-p;u|PSLEPQKSLGDEGLN-p;u|NSLQRVPSYDSFDSE-p;u|RPLSRTQSSPLPQSP-p;u|LNGEASKSQEMVHLV-p;u|NVKSKIGSTENLKHQ-p;u|KELEKRASGQAFELI-p;u	CNLSRVDSTTCLFPV-p;u|PSLEPQKSLGDEGLN-p;u|LNGEASKSQEMVHLV-p;u|LDVQRVPSFESFEDD-p;u|QRVPSFESFEDDCSQ-p;u|GVRLLQDSVDFSLAD-p;u|KTGRRKRSAKPETVI-p;u|RGLKRSLSEMEIGMV-p;u|NVRVSNGSPSLERMD-p;u|VWEDRPSSAGSTPFP-p;u|FPLRKTASEPNLKVR-p;u|KELEKRASGQAFELI-p;u|QDTQRRTSMGGTQQQ-p;u|NVKSKIGSTENLKHQ-p;u	PSLEPQKSLGDEGLN-p;u|VWEDRPSSAGSTPFP-p;u|CNLSRVDSTTCLFPV-p;u|LNGEASKSQEMVHLV-p;u|QRVPSFESFEDDCSQ-p;u|LDVQRVPSFESFEDD-p;u|KELEKRASGQAFELI-p;u|KTGRRKRSAKPETVI-p;u|FPLRKTASEPNLKVR-p;u|QDTQRRTSMGGTQQQ-p;u|NVRVSNGSPSLERMD-p;u|RGLKRSLSEMEIGMV-p;u|QRVPSYDSFDSEDYP-p;u|NSLQRVPSYDSFDSE-p;u|NVKSKIGSTENLKHQ-p;u
KINASE-PSP_PLK1	n=218|DCTN1_S179|CCNT1_S564|NINL_S88|PTEN_S380|CDC25B_T127|PINX1_S226|CDC25B_T265|ANAPC1_T520|IRS1_S24|MAP9_S289|PCNT_T1221|CDC25C_S75|PRC1_T616|CENPQ_S255|PCNT_S1241|KIF2C_S715|KMT2E_S861|MAD1L1_T680|SUZ12_S541|RIOK2_S335|KIF2A_T554|MRE11_S688|CDC27_T209|BORA_S497|OPTN_S177|ANAPC1_S373|CLSPN_S30|PIN1_S65|ESPL1_S1399|FBXO5_S149|ANAPC7_S51|RAP1GAP_S525|CENPQ_T123|PCNT_T1209|PPP6R2_T10|ANAPC1_S547|…	216	18.5	16.7	18.1	17.6	16.7	16.7	17.6	17.1	17.1	17.6	16.7	16.7	17.6	18.1	16.7	17.6	17.1	19	16.7	17.6	17.6	16.7	16.7	18.1	16.7	17.6	17.6	18.5	17.1	17.6	16.7	18.1	18.5	16.7	16.7	SFSGRDSSFTEVPRS-p;u|SKGVDFESSEDDDDD-p;u|DRKVKAKSIVFHRKK-p;u|NTMPRPSTPLDGVST-p;u|QPGVDSLSPVASLPK-p;u|EVIEVDESDVEEDIF-p;u|VSGQLIDSMANSFVG-p;u|SQSSQDSSPVRNLQS-p;u|VQRFNISSHNQSPKR-p;u|NISSHNQSPKRHSIS-p;u|GTEGLVDSFSQGLER-p;u|EGKISTITPQIQAFN-p;u|ENVGKVGSPLDYSLV-p;u|SSGSSEDSFVEIRMA-p;u|LTKAADISLDNLVEG-p;u|VKQFDASTPKNDISP-p;u|LIDSMANSFVGTRSY-p;u|LTKTASESISNLSEA-p;u|PLSKLLGSLDEVVLL-p;u|AMEPGNGSLDLGGDS-p;u…	EVDRRVESEESGDEE-p;u|SSGSSEDSFVEIRMA-p;u|RRVESEESGDEEGKK-p;u|PLSKLLGSLDEVVLL-p;u|SFSGRDSSFTEVPRS-p;u|____MEDSMDMDMSP-p;u|SKGVDFESSEDDDDD-p;u|PTAALNESLVECPKC-p;u|NTMPRPSTPLDGVST-p;u|GTEGLVDSFSQGLER-p;u|AMEPGNGSLDLGGDS-p;u|GSILSDISFDKTDES-p;u|LEITKLDSSIISEGK-p;u|ENVGKVGSPLDYSLV-p;u|VQNKRRRSVTPPEEQ-p;u|QLRNQGETPTTEVPA-p;u|LTKTASESISNLSEA-p;u|SMSEFLESEDGEVEQ-p;u|EVIEVDESDVEEDIF-p;u|TQPNINDSLEITKLD-p;u…	PLSKLLGSLDEVVLL-p;u|SQSSQDSSPVRNLQS-p;u|PTAALNESLVECPKC-p;u|LLPTPPLSPSRRSGL-p;u|EVDRRVESEESGDEE-p;u|QLRNQGETPTTEVPA-p;u|RRVESEESGDEEGKK-p;u|NTMPRPSTPLDGVST-p;u|VSGQLIDSMANSFVG-p;u|FDFEGSLSPVIAPKK-p;u|SSGSSEDSFVEIRMA-p;u|KEEVLSESEAENQQA-p;u|____MEDSMDMDMSP-p;u|AMEPGNGSLDLGGDS-p;u|PEQIKEDSLSEESAD-p;u|SFSGRDSSFTEVPRS-p;u|GSILSDISFDKTDES-p;u|VLDTMNDSLSKILLD-p;u|VQRFNISSHNQSPKR-p;u|NISSHNQSPKRHSIS-p;u…	VKQFDASTPKNDISP-p;u|NTMPRPSTPLDGVST-p;u|DDLNNYDSDDQEKQS-p;u|PLSKLLGSLDEVVLL-p;u|EGKISTITPQIQAFN-p;u|VSGQLIDSMANSFVG-p;u|LLPTPPLSPSRRSGL-p;u|QLRNQGETPTTEVPA-p;u|RRVESEESGDEEGKK-p;u|EVDRRVESEESGDEE-p;u|PEQIKEDSLSEESAD-p;u|SQSSQDSSPVRNLQS-p;u|LIDSMANSFVGTRSY-p;u|ENVGKVGSPLDYSLV-p;u|KEEVLSESEAENQQA-p;u|AMEPGNGSLDLGGDS-p;u|SKGVDFESSEDDDDD-p;u|FDFEGSLSPVIAPKK-p;u|VQNKRRRSVTPPEEQ-p;u|SMSEFLESEDGEVEQ-p;u…	VSGQLIDSMANSFVG-p;u|EVIEVDESDVEEDIF-p;u|SKGVDFESSEDDDDD-p;u|PLSKLLGSLDEVVLL-p;u|DDLNNYDSDDQEKQS-p;u|LIDSMANSFVGTRSY-p;u|RRVESEESGDEEGKK-p;u|EVDRRVESEESGDEE-p;u|____MEDSMDMDMSP-p;u|GSILSDISFDKTDES-p;u|AMEPGNGSLDLGGDS-p;u|GTEGLVDSFSQGLER-p;u|QLRNQGETPTTEVPA-p;u|ENVGKVGSPLDYSLV-p;u|RSIRRRDSCLNSKTK-p;u|LTKTASESISNLSEA-p;u|EGKISTITPQIQAFN-p;u|VKQFDASTPKNDISP-p;u|SSGSSEDSFVEIRMA-p;u|VQRFNISSHNQSPKR-p;u…	QPGVDSLSPVASLPK-p;u|RRVESEESGDEEGKK-p;u|EVDRRVESEESGDEE-p;u|SKGVDFESSEDDDDD-p;u|EVIEVDESDVEEDIF-p;u|FDFEGSLSPVIAPKK-p;u|NTMPRPSTPLDGVST-p;u|ENVGKVGSPLDYSLV-p;u|VSGQLIDSMANSFVG-p;u|QLRNQGETPTTEVPA-p;u|AMEPGNGSLDLGGDS-p;u|KEEVLSESEAENQQA-p;u|SMSEFLESEDGEVEQ-p;u|GTEGLVDSFSQGLER-p;u|LIDSMANSFVGTRSY-p;u|DDLNNYDSDDQEKQS-p;u|EGKISTITPQIQAFN-p;u|SDKKEKKSFSLEEKS-p;u|SFSGRDSSFTEVPRS-p;u|TQPNINDSLEITKLD-p;u…	SRSLYASSPGGVYAT-p;u|SSGSSEDSFVEIRMA-p;u|GVRLLQDSVDFSLAD-p;u|VQNKRRRSVTPPEEQ-p;u|LTKAADISLDNLVEG-p;u|SKGVDFESSEDDDDD-p;u|QPGVDSLSPVASLPK-p;u|GTEGLVDSFSQGLER-p;u|SDKKEKKSFSLEEKS-p;u|VLDTMNDSLSKILLD-p;u|NTMPRPSTPLDGVST-p;u|AMEPGNGSLDLGGDS-p;u|LTKTASESISNLSEA-p;u|VSGQLIDSMANSFVG-p;u|TQPNINDSLEITKLD-p;u|QLRNQGETPTTEVPA-p;u|NISSHNQSPKRHSIS-p;u|PTAALNESLVECPKC-p;u|LEITKLDSSIISEGK-p;u|PLSKLLGSLDEVVLL-p;u…	DRKVKAKSIVFHRKK-p;u|SKGVDFESSEDDDDD-p;u|EVDRRVESEESGDEE-p;u|RRVESEESGDEEGKK-p;u|QPGVDSLSPVASLPK-p;u|NTMPRPSTPLDGVST-p;u|SFSGRDSSFTEVPRS-p;u|AMEPGNGSLDLGGDS-p;u|GTEGLVDSFSQGLER-p;u|QLRNQGETPTTEVPA-p;u|LTKTASESISNLSEA-p;u|EVIEVDESDVEEDIF-p;u|KEEVLSESEAENQQA-p;u|DDLNNYDSDDQEKQS-p;u|VQNKRRRSVTPPEEQ-p;u|SSGSSEDSFVEIRMA-p;u|FDFEGSLSPVIAPKK-p;u|VSGQLIDSMANSFVG-p;u|SMSEFLESEDGEVEQ-p;u|LIDSMANSFVGTRSY-p;u…	DDLNNYDSDDQEKQS-p;u|SKGVDFESSEDDDDD-p;u|GSILSDISFDKTDES-p;u|PLSKLLGSLDEVVLL-p;u|AVDQGNESIVAKTTV-p;u|LTKTASESISNLSEA-p;u|SMSEFLESEDGEVEQ-p;u|AMEPGNGSLDLGGDS-p;u|SQSSQDSSPVRNLQS-p;u|RSIRRRDSCLNSKTK-p;u|GTEGLVDSFSQGLER-p;u|FDFEGSLSPVIAPKK-p;u|EGKISTITPQIQAFN-p;u|KEEVLSESEAENQQA-p;u|LLPTPPLSPSRRSGL-p;u|ENVGKVGSPLDYSLV-p;u|VLDTMNDSLSKILLD-p;u|EVDRRVESEESGDEE-p;u|RRVESEESGDEEGKK-p;u|QLRNQGETPTTEVPA-p;u…	SKGVDFESSEDDDDD-p;u|EVDRRVESEESGDEE-p;u|DRKVKAKSIVFHRKK-p;u|GTEGLVDSFSQGLER-p;u|QPGVDSLSPVASLPK-p;u|RRVESEESGDEEGKK-p;u|NTMPRPSTPLDGVST-p;u|EVIEVDESDVEEDIF-p;u|QLRNQGETPTTEVPA-p;u|VSGQLIDSMANSFVG-p;u|SFSGRDSSFTEVPRS-p;u|FDFEGSLSPVIAPKK-p;u|AMEPGNGSLDLGGDS-p;u|SSGSSEDSFVEIRMA-p;u|SMSEFLESEDGEVEQ-p;u|LIDSMANSFVGTRSY-p;u|LTKTASESISNLSEA-p;u|PLSKLLGSLDEVVLL-p;u|VQNKRRRSVTPPEEQ-p;u|DDLNNYDSDDQEKQS-p;u…	EVIEVDESDVEEDIF-p;u|RRVESEESGDEEGKK-p;u|EITKLDSSIISEGKI-p;u|SKGVDFESSEDDDDD-p;u|QLRNQGETPTTEVPA-p;u|EVDRRVESEESGDEE-p;u|LTKTASESISNLSEA-p;u|AMEPGNGSLDLGGDS-p;u|SSGSSEDSFVEIRMA-p;u|NTMPRPSTPLDGVST-p;u|GTEGLVDSFSQGLER-p;u|____MEDSMDMDMSP-p;u|FDFEGSLSPVIAPKK-p;u|QPGVDSLSPVASLPK-p;u|SMSEFLESEDGEVEQ-p;u|GVRLLQDSVDFSLAD-p;u|VQNKRRRSVTPPEEQ-p;u|LEITKLDSSIISEGK-p;u|LLPTPPLSPSRRSGL-p;u|LIDSMANSFVGTRSY-p;u…	LIDSMANSFVGTRSY-p;u|GSILSDISFDKTDES-p;u|EVIEVDESDVEEDIF-p;u|PEQIKEDSLSEESAD-p;u|____MEDSMDMDMSP-p;u|VSGQLIDSMANSFVG-p;u|SSGSSEDSFVEIRMA-p;u|EVDRRVESEESGDEE-p;u|AVDQGNESIVAKTTV-p;u|ENVGKVGSPLDYSLV-p;u|LTKAADISLDNLVEG-p;u|NTMPRPSTPLDGVST-p;u|PLSKLLGSLDEVVLL-p;u|RRVESEESGDEEGKK-p;u|GTEGLVDSFSQGLER-p;u|QPGVDSLSPVASLPK-p;u|DDLNNYDSDDQEKQS-p;u|SKGVDFESSEDDDDD-p;u|SMSEFLESEDGEVEQ-p;u|LTKTASESISNLSEA-p;u…
KINASE-PSP_TTK	n=58|USP16_S415|HSP90AA1_T115|CDCA8_T94|TTK_S362|TTK_S742|BLM_S1296|USP16_T554|ABL1_T735|TTK_T288|TTK_T33|HSPA9_T62|BUB1B_S1043|MAD1L1_S598|BLM_S144|TTK_T805|BUB1B_S435|CDCA8_T169|TTK_T12|MAD1L1_S22|TTK_S80|ARHGEF17_T1007|MAD1L1_S610|CDCA8_T88|TTK_S824|TTK_T564|TTK_T849|HSPA9_S65|BUB1B_S543|TTK_S37|MAD1L1_S62|TTK_T806|CHEK2_T68|ARHGEF17_T944|CDCA8_S238|TTK_T675|TTK_S363|TTK_T795|MAD1L1_T716|MAD1L…	58	10.3	12.1	10.3	12.1	10.3	12.1	10.3	10.3	12.1	10.3	10.3	12.1	12.1	10.3	10.3	12.1	12.1	10.3	10.3	12.1	10.3	10.3	12.1	10.3	12.1	10.3	10.3	10.3	8.6	10.3	10.3	10.3	10.3	10.3	10.3	GQLVGLNSPNSILKA-p;u|DLEVLTSSPTRNLNG-p;u|VFSVSKQSPPISTSK-p;u|TLSIKKLSPIIEDSR-p;u|LSEKKNKSPPADPPR-p;u|VEDEDQDSEEEKDND-p;u	VFSVSKQSPPISTSK-p;u|DLEVLTSSPTRNLNG-p;u|VEDEDQDSEEEKDND-p;u|GQLVGLNSPNSILKA-p;u|TLSIKKLSPIIEDSR-p;u|REAELLTSAEKRAEM-p;u|LSEKKNKSPPADPPR-p;u	GQLVGLNSPNSILKA-p;u|DLEVLTSSPTRNLNG-p;u|VEDEDQDSEEEKDND-p;u|VFSVSKQSPPISTSK-p;u|LSEKKNKSPPADPPR-p;u|TLSIKKLSPIIEDSR-p;u	GQLVGLNSPNSILKA-p;u|DLEVLTSSPTRNLNG-p;u|VEDEDQDSEEEKDND-p;u|VFSVSKQSPPISTSK-p;u|REAELLTSAEKRAEM-p;u|TLSIKKLSPIIEDSR-p;u|LSEKKNKSPPADPPR-p;u	VEDEDQDSEEEKDND-p;u|TLSIKKLSPIIEDSR-p;u|REAELLTSAEKRAEM-p;u|VFSVSKQSPPISTSK-p;u|DLEVLTSSPTRNLNG-p;u|LSEKKNKSPPADPPR-p;u	VEDEDQDSEEEKDND-p;u|DLEVLTSSPTRNLNG-p;u|VFSVSKQSPPISTSK-p;u|TLSIKKLSPIIEDSR-p;u|GQLVGLNSPNSILKA-p;u|LSEKKNKSPPADPPR-p;u|REAELLTSAEKRAEM-p;u	LSEKKNKSPPADPPR-p;u|TLSIKKLSPIIEDSR-p;u|DLEVLTSSPTRNLNG-p;u|GQLVGLNSPNSILKA-p;u|VFSVSKQSPPISTSK-p;u|VEDEDQDSEEEKDND-p;u	VEDEDQDSEEEKDND-p;u|DLEVLTSSPTRNLNG-p;u|VFSVSKQSPPISTSK-p;u|GQLVGLNSPNSILKA-p;u|TLSIKKLSPIIEDSR-p;u|LSEKKNKSPPADPPR-p;u	TLSIKKLSPIIEDSR-p;u|LSEKKNKSPPADPPR-p;u|REAELLTSAEKRAEM-p;u|DLEVLTSSPTRNLNG-p;u|VEDEDQDSEEEKDND-p;u|GQLVGLNSPNSILKA-p;u|VFSVSKQSPPISTSK-p;u	DLEVLTSSPTRNLNG-p;u|TLSIKKLSPIIEDSR-p;u|LSEKKNKSPPADPPR-p;u|VEDEDQDSEEEKDND-p;u|GQLVGLNSPNSILKA-p;u|VFSVSKQSPPISTSK-p;u	DLEVLTSSPTRNLNG-p;u|VEDEDQDSEEEKDND-p;u|LSEKKNKSPPADPPR-p;u|VFSVSKQSPPISTSK-p;u|GQLVGLNSPNSILKA-p;u|TLSIKKLSPIIEDSR-p;u	DLEVLTSSPTRNLNG-p;u|VEDEDQDSEEEKDND-p;u|GQLVGLNSPNSILKA-p;u|REAELLTSAEKRAEM-p;u|VFSVSKQSPPISTSK-p;u|TLSIKKLSPIIEDSR-p;u|LSEKKNKSPPADPPR-p;u
KINASE-PSP_AMPKA2/PRKAA2	n=27|PLD1_S505|HDAC5_S498|ACACA_S80|PARP1_S177|EEF2K_S398|DUSP1_S334|CDC27_S379|FOXO3_S626|GLI1_S408|PPP1R12C_S452|PINK1_S228|PINK1_S495|HAS2_T110|FOXO3_S555|FOXO3_T179|FOXO3_S588|PINK1_S284|BAIAP2_S366|FOXO3_S413|PAK2_S20|IKBKB_S177|FOXO3_S399|HDAC5_S259|GLI1_S102|IKBKB_S181|TFAP2A_S219|GLI1_T1074	27	22.2	25.9	18.5	25.9	25.9	25.9	22.2	22.2	25.9	22.2	18.5	22.2	25.9	22.2	22.2	25.9	25.9	22.2	25.9	25.9	22.2	22.2	22.2	22.2	25.9	22.2	22.2	22.2	18.5	22.2	22.2	22.2	22.2	22.2	25.9	LHIRSSMSGLHLVKQ-p;u|GLMQRSSSFPYTTKG-p;u|RPLSRTQSSPLPQSP-p;u|AGLQRSASSSWLEGT-p;u|FPLRKTASEPNLKVR-p;u|KTLPRSSSMAAGLER-p;u	LHIRSSMSGLHLVKQ-p;u|GLMQRSSSFPYTTKG-p;u|APPVRMSSTIFSTGG-p;u|KTLPRSSSMAAGLER-p;u|AGLQRSASSSWLEGT-p;u|FPLRKTASEPNLKVR-p;u|RPLSRTQSSPLPQSP-p;u	LHIRSSMSGLHLVKQ-p;u|FPLRKTASEPNLKVR-p;u|RPLSRTQSSPLPQSP-p;u|AGLQRSASSSWLEGT-p;u|KTLPRSSSMAAGLER-p;u	GLMQRSSSFPYTTKG-p;u|LHIRSSMSGLHLVKQ-p;u|AGLQRSASSSWLEGT-p;u|APPVRMSSTIFSTGG-p;u|FPLRKTASEPNLKVR-p;u|RPLSRTQSSPLPQSP-p;u|KTLPRSSSMAAGLER-p;u	GLMQRSSSFPYTTKG-p;u|FPLRKTASEPNLKVR-p;u|AGLQRSASSSWLEGT-p;u|LHIRSSMSGLHLVKQ-p;u|APPVRMSSTIFSTGG-p;u|RPLSRTQSSPLPQSP-p;u|KTLPRSSSMAAGLER-p;u	GLMQRSSSFPYTTKG-p;u|FPLRKTASEPNLKVR-p;u|RPLSRTQSSPLPQSP-p;u|LHIRSSMSGLHLVKQ-p;u|APPVRMSSTIFSTGG-p;u|AGLQRSASSSWLEGT-p;u|KTLPRSSSMAAGLER-p;u	LHIRSSMSGLHLVKQ-p;u|GLMQRSSSFPYTTKG-p;u|RPLSRTQSSPLPQSP-p;u|AGLQRSASSSWLEGT-p;u|FPLRKTASEPNLKVR-p;u|KTLPRSSSMAAGLER-p;u	LHIRSSMSGLHLVKQ-p;u|GLMQRSSSFPYTTKG-p;u|AGLQRSASSSWLEGT-p;u|FPLRKTASEPNLKVR-p;u|RPLSRTQSSPLPQSP-p;u|KTLPRSSSMAAGLER-p;u	FPLRKTASEPNLKVR-p;u|KTLPRSSSMAAGLER-p;u|RPLSRTQSSPLPQSP-p;u|GLMQRSSSFPYTTKG-p;u|LHIRSSMSGLHLVKQ-p;u|APPVRMSSTIFSTGG-p;u|AGLQRSASSSWLEGT-p;u	FPLRKTASEPNLKVR-p;u|KTLPRSSSMAAGLER-p;u|LHIRSSMSGLHLVKQ-p;u|GLMQRSSSFPYTTKG-p;u|AGLQRSASSSWLEGT-p;u|RPLSRTQSSPLPQSP-p;u	LHIRSSMSGLHLVKQ-p;u|GLMQRSSSFPYTTKG-p;u|AGLQRSASSSWLEGT-p;u|FPLRKTASEPNLKVR-p;u|KTLPRSSSMAAGLER-p;u	LHIRSSMSGLHLVKQ-p;u|KTLPRSSSMAAGLER-p;u|APPVRMSSTIFSTGG-p;u|GLMQRSSSFPYTTKG-p;u|AGLQRSASSSWLEGT-p;u|FPLRKTASEPNLKVR-p;u
KINASE-PSP_ERK1/MAPK3	n=284|WASF2_S351|TOP2A_S1361|MCL1_T92|BRAF_T401|ERBB2_T701|MAPT_T231|EIF4EBP1_S65|CEBPA_S21|DUSP6_S174|RRN3_S633|TH_S35|NUP153_S516|NUP153_T388|MAPT_S202|RAF1_S289|DUSP5_S376|RAF1_S301|ATF2_T69|PXN_S83|NUP153_S257|STAT1_S727|PXN_S130|MAZ_T72|MKNK1_T385|MAPT_S199|HSPB8_S24|CALD1_S759|NCF1_S348|BLVRA_S230|CDKN1A_S130|TH_S58|SPHK1_S225|ATF2_T71|BAD_S75|GORASP2_T222|RXRA_S260|NUP153_S338|ADAM17_T735|…	281	37.4	35.9	37.7	37.4	36.7	35.9	36.3	36.7	36.7	37	35.6	36.3	37.4	36.3	35.6	37.4	36.7	38.1	36.7	37	36.3	35.6	36.3	36.3	35.9	36.3	37	37.4	36.3	36.3	35.6	36.3	37.4	35.6	36.7	KVAAETQSPSLFGST-p;u|QSVDKVTSPTKV___-p;u|EEEDGTGSPQLNNR_-p;u|SSSSPPGTPSPADAK-p;u|VKVNGDASPAAAESG-p;u|KTQTPPVSPAPQPTE-p;u|YACASPKTPIQAGGY-p;u|FQSTSVKSPKTVSPP-p;u|QAFELILSPRSKESV-p;u|GQLVGLNSPNSILKA-p;u|TEERLPSSPVYEDAA-p;u|FLMECRNSPVTKTPP-p;u|TNKVQMTSPSSTGSP-p;u|KGLVSPQSPQKSDCQ-p;u|EDEILNRSPRNRKPR-p;u|KSDCQPNSPTESCSS-p;u|GTPGTPRSPPLGLIS-p;u|RELVEPLTPSGEAPN-p;u|GVPAEGRTPPPFPGE-p;u|EIRSRHSSYPAGTED-p;u…	RQPSPSPSPTERAPA-p;u|PSEGRQPSPSPSPTE-p;u|RELVEPLTPSGEAPN-p;u|EGRQPSPSPSPTERA-p;u|PHLDGPPSPRSPVIG-p;u|TEERLPSSPVYEDAA-p;u|DGPPSPRSPVIGSEV-p;u|LPGQMAGTPITPLKD-p;u|TEMDPTYSPAALPQS-p;u|QEQECPPSPEPTRKE-p;u|KPFPAPQTPGRLQPA-p;u|APRSAPPSPPFPPPP-p;u|YSDDVLRSPSGSQRP-p;u|DNMIRRLSPAERAQG-p;u|EDEILNRSPRNRKPR-p;u|DSLDSRLSPPAGLFT-p;u|GTPGTPRSPPLGLIS-p;u|TDNLLPMSPEEFDEV-p;u|QMAGTPITPLKDGFT-p;u|TNKVQMTSPSSTGSP-p;u…	KIKQEVESPTDKSGN-p;u|RSSTPLHSPSPIRVH-p;u|GSPARSSTPLHSPSP-p;u|QEQELPPSPPSAPRK-p;u|MSSILPFTPPVVKRL-p;u|QSPKRPRSPGSNSKV-p;u|ARLGSQHSPGRTASL-p;u|GVPAEGRTPPPFPGE-p;u|NEDDNPPSPIGGDMM-p;u|DSLDSRLSPPAGLFT-p;u|DNMIRRLSPAERAQG-p;u|RRDYDDMSPRRGPPP-p;u|KELQRQASPNIVIAL-p;u|PPTQKPPSPPMSGRG-p;u|TSPSSTGSPMFKFSS-p;u|TNKVQMTSPSSTGSP-p;u|PASPAPLSPLEVELD-p;u|PIPIMPASPQKGHAV-p;u|GSVPLSSSPPATHFP-p;u|QEQECPPSPEPTRKE-p;u…	KIKQEVESPTDKSGN-p;u|KVAAETQSPSLFGST-p;u|TNKVQMTSPSSTGSP-p;u|QAFELILSPRSKESV-p;u|TEMDPTYSPAALPQS-p;u|TDNLLPMSPEEFDEV-p;u|GDRSGYSSPGSPGTP-p;u|DNMIRRLSPAERAQG-p;u|TELVEPLTPSGAMPN-p;u|PHLDGPPSPRSPVIG-p;u|FQSTSVKSPKTVSPP-p;u|PVHPKPLSPDSRASS-p;u|LPGQMAGTPITPLKD-p;u|KPFPAPQTPGRLQPA-p;u|EDEILNRSPRNRKPR-p;u|TSPSSTGSPMFKFSS-p;u|PVVSGDTSPRHLSNV-p;u|GQLVGLNSPNSILKA-p;u|FLMECRNSPVTKTPP-p;u|GAEIVYKSPVVSGDT-p;u…	EEEDGTGSPQLNNR_-p;u|YSDDVLRSPSGSQRP-p;u|TEMDPTYSPAALPQS-p;u|GTPGTPRSPPLGLIS-p;u|PSTSRRFSPPSSSLQ-p;u|KIKQEVESPTDKSGN-p;u|ARLGSQHSPGRTASL-p;u|RELVEPLTPSGEAPN-p;u|KPFPAPQTPGRLQPA-p;u|SSSSPPGTPSPADAK-p;u|VPNDYMTSPARLGSQ-p;u|KVAAETQSPSLFGST-p;u|TNKVQMTSPSSTGSP-p;u|KNENTEGSPQEDGVE-p;u|TEERLPSSPVYEDAA-p;u|PPTQKPPSPPMSGRG-p;u|TELVEPLTPSGAMPN-p;u|KTQTPPVSPAPQPTE-p;u|SSSNRPFTPPTSTGG-p;u|EDEILNRSPRNRKPR-p;u…	TNKVQMTSPSSTGSP-p;u|KIKQEVESPTDKSGN-p;u|EDEILNRSPRNRKPR-p;u|KVAAETQSPSLFGST-p;u|RRDYDDMSPRRGPPP-p;u|DNMIRRLSPAERAQG-p;u|TELVEPLTPSGAMPN-p;u|EGRQPSPSPSPTERA-p;u|TEMDPTYSPAALPQS-p;u|QLSKWPGSPTSRSSD-p;u|YSDDVLRSPSGSQRP-p;u|PHLDGPPSPRSPVIG-p;u|KTQTPPVSPAPQPTE-p;u|IVSSPLNSPLDRSGI-p;u|VKVNGDASPAAAESG-p;u|TEERLPSSPVYEDAA-p;u|RQPSPSPSPTERAPA-p;u|ASSLSESSPPKAMKK-p;u|KPFPAPQTPGRLQPA-p;u|KELQRQASPNIVIAL-p;u…	TPGSRSRTPSLPTPP-p;u|VKVNGDASPAAAESG-p;u|PGVELLLTPREPALP-p;u|VVRTPPKSPSSAKSR-p;u|KKVAVVRTPPKSPSS-p;u|KPFPAPQTPGRLQPA-p;u|PVVSGDTSPRHLSNV-p;u|ARLGSQHSPGRTASL-p;u|GDRSGYSSPGSPGTP-p;u|SVPEFPLSPPKKKDL-p;u|KTPPAPKTPPSSGEP-p;u|QAFELILSPRSKESV-p;u|MSSILPFTPPVVKRL-p;u|SRLSPPHSPRDFTRM-p;u|EEEDGTGSPQLNNR_-p;u|SGYSSPGSPGTPGSR-p;u|PASPAPLSPLEVELD-p;u|QSPKRPRSPGSNSKV-p;u|RELVEPLTPSGEAPN-p;u|TSPSSTGSPMFKFSS-p;u…	SSSSPPGTPSPADAK-p;u|TNKVQMTSPSSTGSP-p;u|QEQELPPSPPSAPRK-p;u|MSSILPFTPPVVKRL-p;u|FLMECRNSPVTKTPP-p;u|EDEILNRSPRNRKPR-p;u|KPFPAPQTPGRLQPA-p;u|PHLDGPPSPRSPVIG-p;u|KVAAETQSPSLFGST-p;u|PASPAPLSPLEVELD-p;u|FQSTSVKSPKTVSPP-p;u|EIRSRHSSYPAGTED-p;u|PATVEPASPTPAHSL-p;u|TGSTPPVSPTPSERS-p;u|PGVELLLTPREPALP-p;u|KELQRQASPNIVIAL-p;u|TEERLPSSPVYEDAA-p;u|TIKQEPVSPKKKENA-p;u|IVSSPLNSPLDRSGI-p;u|KTQTPPVSPAPQPTE-p;u…	QSPKRPRSPGSNSKV-p;u|TNKVQMTSPSSTGSP-p;u|PSTSRRFSPPSSSLQ-p;u|RELVEPLTPSGEAPN-p;u|YSDDVLRSPSGSQRP-p;u|TSPSSTGSPMFKFSS-p;u|MSSILPFTPPVVKRL-p;u|KVAAETQSPSLFGST-p;u|PHLDGPPSPRSPVIG-p;u|TEMDPTYSPAALPQS-p;u|EIRSRHSSYPAGTED-p;u|KIKQEVESPTDKSGN-p;u|KTQTPPVSPAPQPTE-p;u|KNENTEGSPQEDGVE-p;u|PASPAPLSPLEVELD-p;u|GTPGTPRSPPLGLIS-p;u|PIPIMPASPQKGHAV-p;u|SSSGVPYSPAIPNKR-p;u|EDEILNRSPRNRKPR-p;u|QMAEVLPSPRGQRVI-p;u…	MSSILPFTPPVVKRL-p;u|QSPKRPRSPGSNSKV-p;u|EDEILNRSPRNRKPR-p;u|FQSTSVKSPKTVSPP-p;u|FLMECRNSPVTKTPP-p;u|SSSSPPGTPSPADAK-p;u|KIKQEVESPTDKSGN-p;u|TEERLPSSPVYEDAA-p;u|YSDDVLRSPSGSQRP-p;u|PGVELLLTPREPALP-p;u|LPGQMAGTPITPLKD-p;u|TNKVQMTSPSSTGSP-p;u|TELVEPLTPSGAMPN-p;u|RQPSPSPSPTERAPA-p;u|PHLDGPPSPRSPVIG-p;u|DTRQIQPSPPWSYDQ-p;u|EGRQPSPSPSPTERA-p;u|KTQTPPVSPAPQPTE-p;u|PSEGRQPSPSPSPTE-p;u|PATVEPASPTPAHSL-p;u…	DSLDSRLSPPAGLFT-p;u|YSDDVLRSPSGSQRP-p;u|TEERLPSSPVYEDAA-p;u|VKVNGDASPAAAESG-p;u|DNMIRRLSPAERAQG-p;u|SSSSPPGTPSPADAK-p;u|PPTQKPPSPPMSGRG-p;u|KTQTPPVSPAPQPTE-p;u|QEQECPPSPEPTRKE-p;u|PHLDGPPSPRSPVIG-p;u|NEDDNPPSPIGGDMM-p;u|LPGQMAGTPITPLKD-p;u|PVHPKPLSPDSRASS-p;u|TELVEPLTPSGAMPN-p;u|SFPNKQKSAEPSPTV-p;u|RQPSPSPSPTERAPA-p;u|PGVELLLTPREPALP-p;u|KSDGACDSPSSDKEN-p;u|RELVEPLTPSGEAPN-p;u|RRDYDDMSPRRGPPP-p;u…	TEERLPSSPVYEDAA-p;u|TNKVQMTSPSSTGSP-p;u|PGVELLLTPREPALP-p;u|QEQECPPSPEPTRKE-p;u|ASSLSESSPPKAMKK-p;u|KPFPAPQTPGRLQPA-p;u|GTPGTPRSPPLGLIS-p;u|KIKQEVESPTDKSGN-p;u|YQSTIPQSPSPAPDD-p;u|PVHPKPLSPDSRASS-p;u|VKVNGDASPAAAESG-p;u|ARLGSQHSPGRTASL-p;u|TEMDPTYSPAALPQS-p;u|RRDYDDMSPRRGPPP-p;u|YSDDVLRSPSGSQRP-p;u|PHLDGPPSPRSPVIG-p;u|PATVEPASPTPAHSL-p;u|QLSKWPGSPTSRSSD-p;u|KTQTPPVSPAPQPTE-p;u|NEDDNPPSPIGGDMM-p;u…
KINASE-PSP_CDK5	n=117|MCL1_T92|PXN_S85|MAPT_T231|HTT_S1199|NR3C1_S203|MAPT_S202|PIK3C3_T668|BACE1_T252|MAPT_S199|EPRS_S886|AMPH_S285|CDK5R1_S8|CCDC88A_S1675|DRD2_S321|PPFIA1_T701|LMTK2_S1450|XDH_T222|FOXO1_S249|PPP1CA_T320|STMN3_S68|STMN3_S73|PMAIP1_S13|DBN1_S142|_S446|MAPT_T217|FZR1_S40|SRC_S75|MAPT_S214|HTT_S432|RPA2_S29|PLD2_S134|DPYSL2_S27|PTK2_S910|AR_S310|TPPP_S160|PPARG_S273|CDK5R1_T138|TRPC6_S14|NDE1_T19…	116	40.5	42.2	42.2	38.8	38.8	42.2	42.2	36.2	39.7	43.1	39.7	39.7	38.8	44	40.5	38.8	39.7	44.8	38.8	41.4	42.2	40.5	39.7	44	42.2	42.2	43.1	40.5	41.4	42.2	40.5	44	40.5	38.8	38.8	PEGSPSKSPSKKKKK-p;u|NSSDTVTSPQRAGPL-p;u|NPGGRPITPPRNSAK-p;u|HQQPQSSSPVYGSSA-p;u|NTIDLPMSPRTLDSL-p;u|TMLEDSVSPKKSTVL-p;u|VNQGEMSSPQRVTST-p;u|PIPIMPASPQKGHAV-p;u|KIPTDTSTPPRQHLP-p;u|LSQSSDSSPTRNSEP-p;u|LTNPPSLSPIRRKGK-p;u|PVYEVPATPKYATPA-p;u|DLEFSSGSPGKETNE-p;u|LQTSKYFSPPPPARS-p;u|AGGGSSCSPVLSRKQ-p;u|PASSPVSSPSKHGDR-p;u|RKLQGRPSPGPPAPE-p;u|HVQRVLRTPGRQSPG-p;u|NGLARLSSPVLHRLR-p;u|EQASVPLSPKKGSEA-p;u…	SRHAIMRSPQMVSAI-p;u|NTIDLPMSPRTLDSL-p;u|KIPTDTSTPPRQHLP-p;u|NPGGRPITPPRNSAK-p;u|PEKELPVSPGHRKTP-p;u|VNQGEMSSPQRVTST-p;u|LSQSSDSSPTRNSEP-p;u|PASSPVSSPSKHGDR-p;u|LTNPPSLSPIRRKGK-p;u|NSSDTVTSPQRAGPL-p;u|PVYEVPATPKYATPA-p;u|QSPGGFGSPAPSQAE-p;u|LQTSKYFSPPPPARS-p;u|SIKSEPVSPSRERSP-p;u|PESPMLSSPPKKKDT-p;u|AGGGSSCSPVLSRKQ-p;u|PEGSPSKSPSKKKKK-p;u|EQASVPLSPKKGSEA-p;u|PGGNIYISPLKSPYK-p;u|PASSAKTSPAKQQAP-p;u…	QSPGGFGSPAPSQAE-p;u|HVQRVLRTPGRQSPG-p;u|KVAERRSSPLLRRKD-p;u|PEGSPSKSPSKKKKK-p;u|SRHAIMRSPQMVSAI-p;u|AKPEPSPSPRITRKS-p;u|LSQSSDSSPTRNSEP-p;u|PIPIMPASPQKGHAV-p;u|LLPTPPLSPSRRSGL-p;u|LQTSKYFSPPPPARS-p;u|PSDLSPESPMLSSPP-p;u|EQASVPLSPKKGSEA-p;u|AGGGSSCSPVLSRKQ-p;u|PEKELPVSPGHRKTP-p;u|PAKAANRTPPKSPGD-p;u|GVTKAISSPTVSRLT-p;u|PASSPVSSPSKHGDR-p;u|NPGGRPITPPRNSAK-p;u|PESPMLSSPPKKKDT-p;u|TMLEDSVSPKKSTVL-p;u…	GDRSGYSSPGSPGTP-p;u|PEGSPSKSPSKKKKK-p;u|HVQRVLRTPGRQSPG-p;u|PVVSGDTSPRHLSNV-p;u|GAEIVYKSPVVSGDT-p;u|SGYSSPGSPGTPGSR-p;u|NTIDLPMSPRTLDSL-p;u|KIPTDTSTPPRQHLP-p;u|AGGGSSCSPVLSRKQ-p;u|TMLEDSVSPKKSTVL-p;u|TPGSRSRTPSLPTPP-p;u|LSQSSDSSPTRNSEP-p;u|KTPPAPKTPPSSGEP-p;u|RKLQGRPSPGPPAPE-p;u|LLPTPPLSPSRRSGL-p;u|PAKAANRTPPKSPGD-p;u|ANRTPPKSPGDPSKD-p;u|LLSQLYHSPARRFGG-p;u|PSDLSPESPMLSSPP-p;u|NVKSKIGSTENLKHQ-p;u…	SRHAIMRSPQMVSAI-p;u|HVQRVLRTPGRQSPG-p;u|SIKSEPVSPSRERSP-p;u|ANRTPPKSPGDPSKD-p;u|PAKAANRTPPKSPGD-p;u|KVAERRSSPLLRRKD-p;u|KIPTDTSTPPRQHLP-p;u|RKLQGRPSPGPPAPE-p;u|GVTKAISSPTVSRLT-p;u|LQTSKYFSPPPPARS-p;u|HQQPQSSSPVYGSSA-p;u|PEGSPSKSPSKKKKK-p;u|PASSPVSSPSKHGDR-p;u|QSPGGFGSPAPSQAE-p;u|NTIDLPMSPRTLDSL-p;u|NPGGRPITPPRNSAK-p;u|LSQSSDSSPTRNSEP-p;u|AGGGSSCSPVLSRKQ-p;u|NSSDTVTSPQRAGPL-p;u|LLSQLYHSPARRFGG-p;u…	PASSPVSSPSKHGDR-p;u|SRHAIMRSPQMVSAI-p;u|QSPGGFGSPAPSQAE-p;u|IYISPLKSPYKISEG-p;u|LQTSKYFSPPPPARS-p;u|NPGGRPITPPRNSAK-p;u|SIRPALNSPVERPSS-p;u|PEGSPSKSPSKKKKK-p;u|NTIDLPMSPRTLDSL-p;u|PSDLSPESPMLSSPP-p;u|LSQSSDSSPTRNSEP-p;u|PEKELPVSPGHRKTP-p;u|AGGGSSCSPVLSRKQ-p;u|PGGNIYISPLKSPYK-p;u|PESPMLSSPPKKKDT-p;u|NSSDTVTSPQRAGPL-p;u|LTNPPSLSPIRRKGK-p;u|KIPTDTSTPPRQHLP-p;u|KVAERRSSPLLRRKD-p;u|PIPIMPASPQKGHAV-p;u…	SRSLYASSPGGVYAT-p;u|PVYEVPATPKYATPA-p;u|TPGSRSRTPSLPTPP-p;u|PAKAANRTPPKSPGD-p;u|PESPMLSSPPKKKDT-p;u|ANRTPPKSPGDPSKD-p;u|VVRTPPKSPSSAKSR-p;u|PSDLSPESPMLSSPP-p;u|GVTKAISSPTVSRLT-p;u|KKVAVVRTPPKSPSS-p;u|SIKSEPISPPRDRMT-p;u|PVVSGDTSPRHLSNV-p;u|GDRSGYSSPGSPGTP-p;u|KTPPAPKTPPSSGEP-p;u|LQTSKYFSPPPPARS-p;u|SGYSSPGSPGTPGSR-p;u|NVKSKIGSTENLKHQ-p;u|PEKELPVSPGHRKTP-p;u|TMLEDSVSPKKSTVL-p;u|EQASVPLSPKKGSEA-p;u…	NPGGRPITPPRNSAK-p;u|RKLQGRPSPGPPAPE-p;u|LQTSKYFSPPPPARS-p;u|SIKSEPVSPSRERSP-p;u|LSQSSDSSPTRNSEP-p;u|HQQPQSSSPVYGSSA-p;u|PGGNIYISPLKSPYK-p;u|NSSDTVTSPQRAGPL-p;u|HVQRVLRTPGRQSPG-p;u|PSDLSPESPMLSSPP-p;u|SPYKFPSSPLRIPGG-p;u|AGGGSSCSPVLSRKQ-p;u|PEGSPSKSPSKKKKK-p;u|NTIDLPMSPRTLDSL-p;u|IYISPLKSPYKISEG-p;u|PIPIMPASPQKGHAV-p;u|KLQPQEISPPPTANL-p;u|PEKELPVSPGHRKTP-p;u|LTNPPSLSPIRRKGK-p;u|LLSQLYHSPARRFGG-p;u…	QSPGGFGSPAPSQAE-p;u|KVAERRSSPLLRRKD-p;u|SIKSEPISPPRDRMT-p;u|ANRTPPKSPGDPSKD-p;u|GVTKAISSPTVSRLT-p;u|PAKAANRTPPKSPGD-p;u|PIPIMPASPQKGHAV-p;u|NPGGRPITPPRNSAK-p;u|SIKSEPVSPSRERSP-p;u|PASSAKTSPAKQQAP-p;u|HVQRVLRTPGRQSPG-p;u|AGGGSSCSPVLSRKQ-p;u|EQASVPLSPKKGSEA-p;u|LTNPPSLSPIRRKGK-p;u|SRHAIMRSPQMVSAI-p;u|PASSPVSSPSKHGDR-p;u|RKLQGRPSPGPPAPE-p;u|NGLARLSSPVLHRLR-p;u|LLPTPPLSPSRRSGL-p;u|NSSDTVTSPQRAGPL-p;u…	PASSAKTSPAKQQAP-p;u|KVAERRSSPLLRRKD-p;u|PGGNIYISPLKSPYK-p;u|LQTSKYFSPPPPARS-p;u|SPYKFPSSPLRIPGG-p;u|PESPMLSSPPKKKDT-p;u|SIRPALNSPVERPSS-p;u|IYISPLKSPYKISEG-p;u|KLQPQEISPPPTANL-p;u|NPGGRPITPPRNSAK-p;u|NTIDLPMSPRTLDSL-p;u|PEGSPSKSPSKKKKK-p;u|LSQSSDSSPTRNSEP-p;u|PEKELPVSPGHRKTP-p;u|PSDLSPESPMLSSPP-p;u|GAEIVYKSPVVSGDT-p;u|KIPTDTSTPPRQHLP-p;u|NSSDTVTSPQRAGPL-p;u|AGGGSSCSPVLSRKQ-p;u|SIKSEPISPPRDRMT-p;u…	PAKAANRTPPKSPGD-p;u|QSPGGFGSPAPSQAE-p;u|ANRTPPKSPGDPSKD-p;u|LQTSKYFSPPPPARS-p;u|GVTKAISSPTVSRLT-p;u|HVQRVLRTPGRQSPG-p;u|HQQPQSSSPVYGSSA-p;u|DLEFSSGSPGKETNE-p;u|LSQSSDSSPTRNSEP-p;u|KIPTDTSTPPRQHLP-p;u|AGGGSSCSPVLSRKQ-p;u|RKLQGRPSPGPPAPE-p;u|NTIDLPMSPRTLDSL-p;u|PEKELPVSPGHRKTP-p;u|PIPIMPASPQKGHAV-p;u|NPGGRPITPPRNSAK-p;u|PVYEVPATPKYATPA-p;u|TMLEDSVSPKKSTVL-p;u|SIKSEPVSPSRERSP-p;u|LLPTPPLSPSRRSGL-p;u…	ANRTPPKSPGDPSKD-p;u|PAKAANRTPPKSPGD-p;u|GVTKAISSPTVSRLT-p;u|HVQRVLRTPGRQSPG-p;u|SRHAIMRSPQMVSAI-p;u|HQQPQSSSPVYGSSA-p;u|PEGSPSKSPSKKKKK-p;u|LQTSKYFSPPPPARS-p;u|QSPGGFGSPAPSQAE-p;u|NSSDTVTSPQRAGPL-p;u|NPGGRPITPPRNSAK-p;u|LSQSSDSSPTRNSEP-p;u|KLQPQEISPPPTANL-p;u|LTNPPSLSPIRRKGK-p;u|AGGGSSCSPVLSRKQ-p;u|KIPTDTSTPPRQHLP-p;u|IYISPLKSPYKISEG-p;u|PGGNIYISPLKSPYK-p;u|NTIDLPMSPRTLDSL-p;u|KVAERRSSPLLRRKD-p;u…
KINASE-PSP_IGF1R	n=23|IRS1_Y989|IGF1R_Y980|PDPK1_Y376|PTH1R_Y494|IRS1_Y632|ANXA2_Y24|PCNA_Y133|PCNA_Y250|IRS1_Y941|IGF1R_Y1165|IRS1_Y662|IRS1_Y896|IRS1_Y732|IGF1R_Y1161|IGF1R_Y1280|IRS1_Y1179|IGF1R_Y1166|PCNA_Y60|SIRPA_Y496|IGF1R_Y1281|SIRPA_Y470|PDPK1_Y373|IGF1R_S982	23	26.1	17.4	21.7	26.1	21.7	17.4	21.7	26.1	26.1	17.4	26.1	26.1	26.1	21.7	26.1	26.1	26.1	21.7	21.7	17.4	21.7	26.1	26.1	21.7	17.4	21.7	17.4	26.1	17.4	21.7	26.1	21.7	26.1	17.4	21.7	DIYETDYYRKGGKGL-p;u|FGMTRDIYETDYYRK-p;u|RDIYETDYYRKGGKG-p;u|GRKGSGDYMPMSPKS-p;u|VPSSRGDYMTMQMSC-p;u|HSTPPSAYGSVKAYT-p;u	HSTPPSAYGSVKAYT-p;u|FGMTRDIYETDYYRK-p;u|RDIYETDYYRKGGKG-p;u|DIYETDYYRKGGKGL-p;u	DIYETDYYRKGGKGL-p;u|FGMTRDIYETDYYRK-p;u|RDIYETDYYRKGGKG-p;u|HSTPPSAYGSVKAYT-p;u|GRKGSGDYMPMSPKS-p;u	HSTPPSAYGSVKAYT-p;u|RDIYETDYYRKGGKG-p;u|DIYETDYYRKGGKGL-p;u|FGMTRDIYETDYYRK-p;u|GRKGSGDYMPMSPKS-p;u|VPSSRGDYMTMQMSC-p;u	HSTPPSAYGSVKAYT-p;u|DIYETDYYRKGGKGL-p;u|RDIYETDYYRKGGKG-p;u|FGMTRDIYETDYYRK-p;u|GRKGSGDYMPMSPKS-p;u	HSTPPSAYGSVKAYT-p;u|FGMTRDIYETDYYRK-p;u|RDIYETDYYRKGGKG-p;u|DIYETDYYRKGGKGL-p;u	HSTPPSAYGSVKAYT-p;u|FGMTRDIYETDYYRK-p;u|GRKGSGDYMPMSPKS-p;u|DIYETDYYRKGGKGL-p;u|RDIYETDYYRKGGKG-p;u	HSTPPSAYGSVKAYT-p;u|DIYETDYYRKGGKGL-p;u|FGMTRDIYETDYYRK-p;u|RDIYETDYYRKGGKG-p;u|GRKGSGDYMPMSPKS-p;u|VPSSRGDYMTMQMSC-p;u	GRKGSGDYMPMSPKS-p;u|RDIYETDYYRKGGKG-p;u|HSTPPSAYGSVKAYT-p;u|VPSSRGDYMTMQMSC-p;u|FGMTRDIYETDYYRK-p;u|DIYETDYYRKGGKGL-p;u	HSTPPSAYGSVKAYT-p;u|FGMTRDIYETDYYRK-p;u|RDIYETDYYRKGGKG-p;u|DIYETDYYRKGGKGL-p;u	GRKGSGDYMPMSPKS-p;u|DIYETDYYRKGGKGL-p;u|RDIYETDYYRKGGKG-p;u|FGMTRDIYETDYYRK-p;u|VPSSRGDYMTMQMSC-p;u|HSTPPSAYGSVKAYT-p;u	GRKGSGDYMPMSPKS-p;u|VPSSRGDYMTMQMSC-p;u|HSTPPSAYGSVKAYT-p;u|DIYETDYYRKGGKGL-p;u|FGMTRDIYETDYYRK-p;u|RDIYETDYYRKGGKG-p;u
KINASE-PSP_mTOR/MTOR	n=82|RPTOR_S859|EIF4EBP1_S65|SOD1_T40|ANKRD17_S2047|EEF2K_S72|SRRM2_S1329|MTOR_S2454|MTOR_S2481|ELL_S309|EEF2K_S74|ULK1_S758|BRD9_S588|DEPTOR_T295|RPS6KB1_S394|ESR1_S106|FAM21A_S700|ESR1_S104|TFEB_S122|DEPTOR_S293|SRRM1_T574|DAP_S51|BAG3_T285|RPRD1B_S166|EIF4EBP1_T70|SRRM2_S1326|PATL1_S179|RPS6KB1_T412|GRB10_S428|UVRAG_S571|SGK1_S422|APBA3_S7|AKT1_S473|SRRM1_T572|ZNRF2_S145|TFEB_S211|MTOR_S2478|R…	81	53.1	50.6	51.9	53.1	50.6	50.6	51.9	50.6	53.1	51.9	53.1	51.9	53.1	53.1	54.3	53.1	53.1	53.1	50.6	51.9	51.9	54.3	51.9	53.1	50.6	51.9	51.9	53.1	53.1	51.9	54.3	53.1	53.1	50.6	50.6	SSVDTLLSPTALIDS-p;u|FLMECRNSPVTKTPP-p;u|STSFMSVSPSKEIKI-p;u|STPVRSVSENSLVAM-p;u|PIHKFGFSTLALVEK-p;u|GGTLFSTTPGGTRII-p;u|SGGSLFGSPPTSVPP-p;u|DPYEFLQSPEPAASA-p;u|NSPLRENSFGSPLEF-p;u|FRLRRAASALLLRSP-p;u|DPESNPTSPMAGRRH-p;u|SPEHKELSNSPLREN-p;u|KITSLSSSLDTSLDF-p;u|RNSPVTKTPPRDLPT-p;u|PVVFTVGSPPSGSTP-p;u|LPTTVPESPNYRNTR-p;u|SPGYEPRSPGYESES-p;u|LGDPAASSPPGERGR-p;u|ALPRRSTSPIIGSPP-p;u|STSPIIGSPPVRAVP-p;u…	GRLNCSTSPEIFRKC-p;u|KITSLSSSLDTSLDF-p;u|STSPIIGSPPVRAVP-p;u|DQEWESPSPPKPTVF-p;u|FDFPKTPSSQNLLAL-p;u|RPHFPQFSYSASGTA-p;u|LGDPAASSPPGERGR-p;u|SGGSLFGSPPTSVPP-p;u|PRRRRTPTPPPRRRT-p;u|RNSPVTKTPPRDLPT-p;u|TVPESIHSFIGDGLV-p;u|PPPRRRRTPTPPPRR-p;u|TGTTVPESIHSFIGD-p;u|PPGDYSTTPGGTLFS-p;u|PPQTSGLSPSRLSKS-p;u|SSVDTLLSPTALIDS-p;u|ALPRRSTSPIIGSPP-p;u|PVVFTVGSPPSGSTP-p;u|PHVLEALSPPQTSGL-p;u|FLMECRNSPVTKTPP-p;u…	FRLRRAASALLLRSP-p;u|RSSTPLHSPSPIRVH-p;u|STSFMSVSPSKEIKI-p;u|GSPARSSTPLHSPSP-p;u|DNIPEMPSPKKMHQG-p;u|PIHKFGFSTLALVEK-p;u|LGDPAASSPPGERGR-p;u|LRENSFGSPLEFRNS-p;u|DPYEFLQSPEPAASA-p;u|SPEHKELSNSPLREN-p;u|PPPRRRRTPTPPPRR-p;u|PRRRRTPTPPPRRRT-p;u|SGGSLFGSPPTSVPP-p;u|SSVDTLLSPTALIDS-p;u|DSYSAGQSVEILDGV-p;u|LLPTPPLSPSRRSGL-p;u|DPESNPTSPMAGRRH-p;u|NSPLRENSFGSPLEF-p;u|PPQTSGLSPSRLSKS-p;u|DTSSLTQSAPASPTN-p;u…	FRLRRAASALLLRSP-p;u|STSFMSVSPSKEIKI-p;u|FLMECRNSPVTKTPP-p;u|SSVDTLLSPTALIDS-p;u|LGDPAASSPPGERGR-p;u|STPVRSVSENSLVAM-p;u|PTQQYAKSLPVSVPV-p;u|LLPTPPLSPSRRSGL-p;u|PPPRRRRTPTPPPRR-p;u|GGTLFSTTPGGTRII-p;u|EPSTIARSLPTTVPE-p;u|DPYEFLQSPEPAASA-p;u|PRRRRTPTPPPRRRT-p;u|RPHFPQFSYSASGTA-p;u|RNSPVTKTPPRDLPT-p;u|DQEWESPSPPKPTVF-p;u|PIHKFGFSTLALVEK-p;u|ALPRRSTSPIIGSPP-p;u|RSSTPLHSPSPIRVH-p;u|LRENSFGSPLEFRNS-p;u…	FRLRRAASALLLRSP-p;u|TVPESIHSFIGDGLV-p;u|TGTTVPESIHSFIGD-p;u|FDFPKTPSSQNLLAL-p;u|DSYSAGQSVEILDGV-p;u|KITSLSSSLDTSLDF-p;u|GRLNCSTSPEIFRKC-p;u|LGDPAASSPPGERGR-p;u|DPYEFLQSPEPAASA-p;u|PVVFTVGSPPSGSTP-p;u|GGTLFSTTPGGTRII-p;u|SSVDTLLSPTALIDS-p;u|ALPRRSTSPIIGSPP-p;u|LPTTVPESPNYRNTR-p;u|PPQTSGLSPSRLSKS-p;u|SGGSLFGSPPTSVPP-p;u|PRRRRTPTPPPRRRT-p;u|LRENSFGSPLEFRNS-p;u|PHVLEALSPPQTSGL-p;u|PPPRRRRTPTPPPRR-p;u…	FRLRRAASALLLRSP-p;u|SSVDTLLSPTALIDS-p;u|SPEHKELSNSPLREN-p;u|PRRRRTPTPPPRRRT-p;u|KITSLSSSLDTSLDF-p;u|PPPRRRRTPTPPPRR-p;u|LPTTVPESPNYRNTR-p;u|DSYSAGQSVEILDGV-p;u|EPSTIARSLPTTVPE-p;u|DQEWESPSPPKPTVF-p;u|LGDPAASSPPGERGR-p;u|STSFMSVSPSKEIKI-p;u|PPGDYSTTPGGTLFS-p;u|PVVFTVGSPPSGSTP-p;u|TVPESIHSFIGDGLV-p;u|TGTTVPESIHSFIGD-p;u|LTQSAPASPTNKGVH-p;u|DTSSLTQSAPASPTN-p;u|PPQTSGLSPSRLSKS-p;u|PHVLEALSPPQTSGL-p;u…	STSFMSVSPSKEIKI-p;u|PRRRRTPTPPPRRRT-p;u|DPESNPTSPMAGRRH-p;u|LGDPAASSPPGERGR-p;u|GRLNCSTSPEIFRKC-p;u|PPPRRRRTPTPPPRR-p;u|RPHFPQFSYSASGTA-p;u|STPVRSVSENSLVAM-p;u|NSPLRENSFGSPLEF-p;u|DTSSLTQSAPASPTN-p;u|SPGYEPRSPGYESES-p;u|SPEHKELSNSPLREN-p;u|PHVLEALSPPQTSGL-p;u|PPQTSGLSPSRLSKS-p;u|RNSPVTKTPPRDLPT-p;u|PVVFTVGSPPSGSTP-p;u|LRENSFGSPLEFRNS-p;u|LTQSAPASPTNKGVH-p;u|GGTLFSTTPGGTRII-p;u|DPYEFLQSPEPAASA-p;u…	FRLRRAASALLLRSP-p;u|STSFMSVSPSKEIKI-p;u|FLMECRNSPVTKTPP-p;u|LGDPAASSPPGERGR-p;u|PIHKFGFSTLALVEK-p;u|EPSTIARSLPTTVPE-p;u|SSVDTLLSPTALIDS-p;u|PRRRRTPTPPPRRRT-p;u|SSSQRAASLDSVATS-p;u|PPPRRRRTPTPPPRR-p;u|DTSSLTQSAPASPTN-p;u|LTQSAPASPTNKGVH-p;u|RNSPVTKTPPRDLPT-p;u|SGGSLFGSPPTSVPP-p;u|NSPLRENSFGSPLEF-p;u|PPGDYSTTPGGTLFS-p;u|GGTLFSTTPGGTRII-p;u|DSYSAGQSVEILDGV-p;u|PVVFTVGSPPSGSTP-p;u|DPYEFLQSPEPAASA-p;u…	STSFMSVSPSKEIKI-p;u|SSSQRAASLDSVATS-p;u|LGDPAASSPPGERGR-p;u|SPGYEPRSPGYESES-p;u|NSPLRENSFGSPLEF-p;u|PRRRRTPTPPPRRRT-p;u|PPPRRRRTPTPPPRR-p;u|TAQMITITPPDQDDS-p;u|LTQSAPASPTNKGVH-p;u|STPVRSVSENSLVAM-p;u|PKPPPAASPGVRAGH-p;u|SPEHKELSNSPLREN-p;u|DTSSLTQSAPASPTN-p;u|LRENSFGSPLEFRNS-p;u|RSSTPLHSPSPIRVH-p;u|GSPARSSTPLHSPSP-p;u|DPYEFLQSPEPAASA-p;u|DNIPEMPSPKKMHQG-p;u|GGTLFSTTPGGTRII-p;u|ERYSSSGSPANSFHF-p;u…	FLMECRNSPVTKTPP-p;u|STSFMSVSPSKEIKI-p;u|TVPESIHSFIGDGLV-p;u|TGTTVPESIHSFIGD-p;u|LGDPAASSPPGERGR-p;u|LPTTVPESPNYRNTR-p;u|KITSLSSSLDTSLDF-p;u|EPSTIARSLPTTVPE-p;u|DTSSLTQSAPASPTN-p;u|DQEWESPSPPKPTVF-p;u|PIHKFGFSTLALVEK-p;u|LTQSAPASPTNKGVH-p;u|PRRRRTPTPPPRRRT-p;u|DPYEFLQSPEPAASA-p;u|GGTLFSTTPGGTRII-p;u|DSYSAGQSVEILDGV-p;u|PVVFTVGSPPSGSTP-p;u|RNSPVTKTPPRDLPT-p;u|SGGSLFGSPPTSVPP-p;u|PPPRRRRTPTPPPRR-p;u…	TVPESIHSFIGDGLV-p;u|TGTTVPESIHSFIGD-p;u|STPVRSVSENSLVAM-p;u|DSYSAGQSVEILDGV-p;u|SGGSLFGSPPTSVPP-p;u|PRRRRTPTPPPRRRT-p;u|LGDPAASSPPGERGR-p;u|PPPRRRRTPTPPPRR-p;u|DQEWESPSPPKPTVF-p;u|SPEHKELSNSPLREN-p;u|EDGGWEWSDDEFDEE-p;u|DPYEFLQSPEPAASA-p;u|KITSLSSSLDTSLDF-p;u|LRENSFGSPLEFRNS-p;u|NSPLRENSFGSPLEF-p;u|SSVDTLLSPTALIDS-p;u|ALPRRSTSPIIGSPP-p;u|STSFMSVSPSKEIKI-p;u|PPGDYSTTPGGTLFS-p;u|PVVFTVGSPPSGSTP-p;u…	PTQQYAKSLPVSVPV-p;u|FRLRRAASALLLRSP-p;u|DQEWESPSPPKPTVF-p;u|STPVRSVSENSLVAM-p;u|DPYEFLQSPEPAASA-p;u|FDFPKTPSSQNLLAL-p;u|LPTTVPESPNYRNTR-p;u|DSYSAGQSVEILDGV-p;u|TVPESIHSFIGDGLV-p;u|LGDPAASSPPGERGR-p;u|STSFMSVSPSKEIKI-p;u|SGGSLFGSPPTSVPP-p;u|SSSQRAASLDSVATS-p;u|EPSTIARSLPTTVPE-p;u|KITSLSSSLDTSLDF-p;u|TGTTVPESIHSFIGD-p;u|GGTLFSTTPGGTRII-p;u|LTQSAPASPTNKGVH-p;u|DTSSLTQSAPASPTN-p;u|SPSRLSKSQGGEEEG-p;u…
KINASE-PSP_Chk2/CHEK2	n=65|TP53_S366|E2F3_S124|SIAH2_S68|TP53_S37|CHEK2_S33|CHEK2_S435|CHEK2_S260|TTK_T288|AATF_S510|SIAH2_T26|FOXM1_S361|SIAH2_T119|XRCC1_S184|CDC25A_S124|CHEK2_S140|BAIAP2L1_S331|CHEK2_S516|LATS2_S446|PSME3_S247|TP53_T18|ELAVL1_T118|CDC25A_S178|PML_S117|TP53_S20|LATS2_S408|CDK11B_S752|LATS2_S172|AATF_S143|CHEK2_S35|E2F1_S364|MAPT_S262|BLM_T182|HIST1H1C_T92|HIST1H1C_S36|BRCA1_S988|VHL_S111|HIST1H1C_S5…	65	24.6	21.5	21.5	24.6	21.5	21.5	21.5	24.6	23.1	20	24.6	24.6	24.6	20	23.1	24.6	23.1	21.5	21.5	21.5	21.5	23.1	24.6	20	21.5	21.5	20	24.6	18.5	21.5	23.1	20	24.6	18.5	21.5	KRKFAIGSAREADPA-p;u|SKILGETSLMRTLCG-p;u|SGVKRSRSGEGEVSG-p;u|YWFGRDKSCEYCFDE-p;u|GGTPRKASGPPVSEL-p;u|ATLARRDSLQKPGLE-p;u|VAASKERSGVSLAAL-p;u|PQVLAQPSTSRKRPR-p;u|SGLYRSPSMPENLNR-p;u|MYLSPVRSPKKKGST-p;u|GETSLMRTLCGTPTY-p;u|LMRTLCGTPTYLAPE-p;u|PSLQRSVSVATGLNM-p;u|QRVKRGTSPRPPEGG-p;u|PDCRRTISAPVVRPK-p;u|NVKSKIGSTENLKHQ-p;u	ATLARRDSLQKPGLE-p;u|KRKFAIGSAREADPA-p;u|GGTPRKASGPPVSEL-p;u|GETSLMRTLCGTPTY-p;u|SKILGETSLMRTLCG-p;u|PSLQRSVSVATGLNM-p;u|LMRTLCGTPTYLAPE-p;u|QRVKRGTSPRPPEGG-p;u|MYLSPVRSPKKKGST-p;u|PQVLAQPSTSRKRPR-p;u|SGVKRSRSGEGEVSG-p;u|SGLYRSPSMPENLNR-p;u|PDCRRTISAPVVRPK-p;u|NVKSKIGSTENLKHQ-p;u	MYLSPVRSPKKKGST-p;u|SGLYRSPSMPENLNR-p;u|QRVKRGTSPRPPEGG-p;u|GGTPRKASGPPVSEL-p;u|PQVLAQPSTSRKRPR-p;u|LMRTLCGTPTYLAPE-p;u|PSLQRSVSVATGLNM-p;u|GETSLMRTLCGTPTY-p;u|SKILGETSLMRTLCG-p;u|PDCRRTISAPVVRPK-p;u|SGVKRSRSGEGEVSG-p;u|ATLARRDSLQKPGLE-p;u|KRKFAIGSAREADPA-p;u|NVKSKIGSTENLKHQ-p;u	MYLSPVRSPKKKGST-p;u|SGLYRSPSMPENLNR-p;u|PDCRRTISAPVVRPK-p;u|GGTPRKASGPPVSEL-p;u|SGVKRSRSGEGEVSG-p;u|VAASKERSGVSLAAL-p;u|NVKSKIGSTENLKHQ-p;u|QRVKRGTSPRPPEGG-p;u|PSLQRSVSVATGLNM-p;u|GETSLMRTLCGTPTY-p;u|LMRTLCGTPTYLAPE-p;u|PQVLAQPSTSRKRPR-p;u|YWFGRDKSCEYCFDE-p;u|SKILGETSLMRTLCG-p;u|ATLARRDSLQKPGLE-p;u|KRKFAIGSAREADPA-p;u	SGVKRSRSGEGEVSG-p;u|MYLSPVRSPKKKGST-p;u|GGTPRKASGPPVSEL-p;u|ATLARRDSLQKPGLE-p;u|PDCRRTISAPVVRPK-p;u|LMRTLCGTPTYLAPE-p;u|PSLQRSVSVATGLNM-p;u|SKILGETSLMRTLCG-p;u|SGLYRSPSMPENLNR-p;u|PQVLAQPSTSRKRPR-p;u|GETSLMRTLCGTPTY-p;u|QRVKRGTSPRPPEGG-p;u|KRKFAIGSAREADPA-p;u|NVKSKIGSTENLKHQ-p;u	MYLSPVRSPKKKGST-p;u|SGVKRSRSGEGEVSG-p;u|KRKFAIGSAREADPA-p;u|GGTPRKASGPPVSEL-p;u|LMRTLCGTPTYLAPE-p;u|SKILGETSLMRTLCG-p;u|PQVLAQPSTSRKRPR-p;u|QRVKRGTSPRPPEGG-p;u|GETSLMRTLCGTPTY-p;u|PSLQRSVSVATGLNM-p;u|ATLARRDSLQKPGLE-p;u|SGLYRSPSMPENLNR-p;u|PDCRRTISAPVVRPK-p;u|NVKSKIGSTENLKHQ-p;u	GGTPRKASGPPVSEL-p;u|MYLSPVRSPKKKGST-p;u|KRKFAIGSAREADPA-p;u|SKILGETSLMRTLCG-p;u|NVKSKIGSTENLKHQ-p;u|SGVKRSRSGEGEVSG-p;u|PQVLAQPSTSRKRPR-p;u|PDCRRTISAPVVRPK-p;u|GETSLMRTLCGTPTY-p;u|QRVKRGTSPRPPEGG-p;u|LMRTLCGTPTYLAPE-p;u|PSLQRSVSVATGLNM-p;u|SGLYRSPSMPENLNR-p;u|ATLARRDSLQKPGLE-p;u	GGTPRKASGPPVSEL-p;u|SKILGETSLMRTLCG-p;u|SGVKRSRSGEGEVSG-p;u|YWFGRDKSCEYCFDE-p;u|PSLQRSVSVATGLNM-p;u|KRKFAIGSAREADPA-p;u|MYLSPVRSPKKKGST-p;u|VAASKERSGVSLAAL-p;u|GETSLMRTLCGTPTY-p;u|QRVKRGTSPRPPEGG-p;u|LMRTLCGTPTYLAPE-p;u|PQVLAQPSTSRKRPR-p;u|ATLARRDSLQKPGLE-p;u|SGLYRSPSMPENLNR-p;u|PDCRRTISAPVVRPK-p;u|NVKSKIGSTENLKHQ-p;u	VAASKERSGVSLAAL-p;u|GGTPRKASGPPVSEL-p;u|SGVKRSRSGEGEVSG-p;u|PDCRRTISAPVVRPK-p;u|GETSLMRTLCGTPTY-p;u|LMRTLCGTPTYLAPE-p;u|PQVLAQPSTSRKRPR-p;u|YWFGRDKSCEYCFDE-p;u|QRVKRGTSPRPPEGG-p;u|SKILGETSLMRTLCG-p;u|PSLQRSVSVATGLNM-p;u|KRKFAIGSAREADPA-p;u|ATLARRDSLQKPGLE-p;u|SGLYRSPSMPENLNR-p;u|NVKSKIGSTENLKHQ-p;u	MYLSPVRSPKKKGST-p;u|PSLQRSVSVATGLNM-p;u|GGTPRKASGPPVSEL-p;u|KRKFAIGSAREADPA-p;u|SGVKRSRSGEGEVSG-p;u|PQVLAQPSTSRKRPR-p;u|LMRTLCGTPTYLAPE-p;u|PDCRRTISAPVVRPK-p;u|QRVKRGTSPRPPEGG-p;u|SGLYRSPSMPENLNR-p;u|GETSLMRTLCGTPTY-p;u|ATLARRDSLQKPGLE-p;u|NVKSKIGSTENLKHQ-p;u	SGVKRSRSGEGEVSG-p;u|KRKFAIGSAREADPA-p;u|SKILGETSLMRTLCG-p;u|PQVLAQPSTSRKRPR-p;u|PSLQRSVSVATGLNM-p;u|YWFGRDKSCEYCFDE-p;u|PDCRRTISAPVVRPK-p;u|QRVKRGTSPRPPEGG-p;u|MYLSPVRSPKKKGST-p;u|GETSLMRTLCGTPTY-p;u|GGTPRKASGPPVSEL-p;u|LMRTLCGTPTYLAPE-p;u|VAASKERSGVSLAAL-p;u|SGLYRSPSMPENLNR-p;u|ATLARRDSLQKPGLE-p;u|NVKSKIGSTENLKHQ-p;u	SKILGETSLMRTLCG-p;u|SGLYRSPSMPENLNR-p;u|PQVLAQPSTSRKRPR-p;u|PSLQRSVSVATGLNM-p;u|ATLARRDSLQKPGLE-p;u|MYLSPVRSPKKKGST-p;u|GETSLMRTLCGTPTY-p;u|YWFGRDKSCEYCFDE-p;u|LMRTLCGTPTYLAPE-p;u|GGTPRKASGPPVSEL-p;u|SGVKRSRSGEGEVSG-p;u|KRKFAIGSAREADPA-p;u|QRVKRGTSPRPPEGG-p;u|VAASKERSGVSLAAL-p;u|PDCRRTISAPVVRPK-p;u|NVKSKIGSTENLKHQ-p;u
KINASE-PSP_JNK3/MAPK10	n=10|MYC_S71|APP_T668|CDKN1A_S130|ATN1_S739|BID_T59|MYC_S62|MYC_T58|NFATC1_S172|CDKN1A_S98|APLP2_T736	10	50	50	50	50	50	50	50	50	50	50	50	50	50	50	50	50	50	50	50	50	50	50	50	50	50	50	50	50	50	50	50	50	50	50	50	SRRSGLCSPSYVAVT-p;u|EEYETPESPVPPARS-p;u|LLPTPPLSPSRRSGL-p;u|KKFELLPTPPLSPSR-p;u|SGEQAEGSPGGPGDS-p;u	SGEQAEGSPGGPGDS-p;u|EEYETPESPVPPARS-p;u|SRRSGLCSPSYVAVT-p;u|LLPTPPLSPSRRSGL-p;u|KKFELLPTPPLSPSR-p;u	LLPTPPLSPSRRSGL-p;u|KKFELLPTPPLSPSR-p;u|SRRSGLCSPSYVAVT-p;u|EEYETPESPVPPARS-p;u|SGEQAEGSPGGPGDS-p;u	SRRSGLCSPSYVAVT-p;u|SGEQAEGSPGGPGDS-p;u|LLPTPPLSPSRRSGL-p;u|KKFELLPTPPLSPSR-p;u|EEYETPESPVPPARS-p;u	SRRSGLCSPSYVAVT-p;u|EEYETPESPVPPARS-p;u|LLPTPPLSPSRRSGL-p;u|KKFELLPTPPLSPSR-p;u|SGEQAEGSPGGPGDS-p;u	SRRSGLCSPSYVAVT-p;u|EEYETPESPVPPARS-p;u|LLPTPPLSPSRRSGL-p;u|KKFELLPTPPLSPSR-p;u|SGEQAEGSPGGPGDS-p;u	EEYETPESPVPPARS-p;u|SRRSGLCSPSYVAVT-p;u|LLPTPPLSPSRRSGL-p;u|KKFELLPTPPLSPSR-p;u|SGEQAEGSPGGPGDS-p;u	SRRSGLCSPSYVAVT-p;u|LLPTPPLSPSRRSGL-p;u|KKFELLPTPPLSPSR-p;u|EEYETPESPVPPARS-p;u|SGEQAEGSPGGPGDS-p;u	SRRSGLCSPSYVAVT-p;u|LLPTPPLSPSRRSGL-p;u|KKFELLPTPPLSPSR-p;u|SGEQAEGSPGGPGDS-p;u|EEYETPESPVPPARS-p;u	SRRSGLCSPSYVAVT-p;u|EEYETPESPVPPARS-p;u|LLPTPPLSPSRRSGL-p;u|SGEQAEGSPGGPGDS-p;u|KKFELLPTPPLSPSR-p;u	KKFELLPTPPLSPSR-p;u|LLPTPPLSPSRRSGL-p;u|SGEQAEGSPGGPGDS-p;u|SRRSGLCSPSYVAVT-p;u|EEYETPESPVPPARS-p;u	SRRSGLCSPSYVAVT-p;u|EEYETPESPVPPARS-p;u|LLPTPPLSPSRRSGL-p;u|KKFELLPTPPLSPSR-p;u|SGEQAEGSPGGPGDS-p;u
KINASE-PSP_JNK1/MAPK8	n=123|SIRT1_S47|SREBF1_T81|MAPT_T231|JUNB_T102|EIF4ENIF1_S513|EEF1A2_S358|CDT1_T29|MAPT_S202|ATF2_T69|MYC_S71|APP_T668|FOXO3_S574|RARA_S461|BCL2L11_T56|CDKN1A_S130|ATF2_T71|ATN1_S739|NR4A1_S95|RXRA_S260|SP1_T278|EEF1A2_S205|PXN_S178|SFN_S186|MAPK8IP1_T205|BCL2L1_T47|EIF4ENIF1_S301|LAT_T155|STAT6_S707|CTBP1_S422|RUNX2_S118|NFATC4_S217|JUND_S100|ARHGAP8_S455|BCL2_S70|NCOA3_S867|TWIST1_S68|NFATC4_S2…	121	25.6	27.3	27.3	27.3	26.4	27.3	26.4	24.8	27.3	27.3	25.6	26.4	27.3	26.4	25.6	27.3	27.3	27.3	26.4	28.9	26.4	25.6	26.4	26.4	27.3	26.4	27.3	25.6	24.8	26.4	25.6	26.4	25.6	26.4	26.4	PEGATPTSPVGHFAK-p;u|SEMKYLGSPITTVPK-p;u|VKVNGDASPAAAESG-p;u|ILDLISESPIKGRAQ-p;u|ADREAASSPAGEPLR-p;u|GLFNELASPFENEFK-p;u|NTIDLPMSPRTLDSL-p;u|DGPGLERSPGEPGGA-p;u|GLEQAILSPGQNSGN-p;u|TKPTLPPSPLMAARR-p;u|SGSLLTRSPTPAPFS-p;u|SVIVADQTPTPTRFL-p;u|SPVSVGSSPPVKNIS-p;u|IVADQTPTPTRFLKN-p;u|ASITSMLSPSFTPTS-p;u|PTYTIPLSPVLSPTL-p;u|PSADRDSSPTTNSKL-p;u|LTQSAPASPTNKGVH-p;u|PCPQPLRSPSLDNPT-p;u|TESITATSPASMVGG-p;u…	NRAVSLDSPVSVGSS-p;u|PCPQPLRSPSLDNPT-p;u|NTIDLPMSPRTLDSL-p;u|PSADRDSSPTTNSKL-p;u|TESITATSPASMVGG-p;u|SGEQAEGSPGGPGDS-p;u|VKVNGDASPAAAESG-p;u|LGLLKLASPELERLI-p;u|KNSDLLTSPDVGLLK-p;u|ADREAASSPAGEPLR-p;u|SVIVADQTPTPTRFL-p;u|IVADQTPTPTRFLKN-p;u|SGSLLTRSPTPAPFS-p;u|TKPTLPPSPLMAARR-p;u|EEYETPESPVPPARS-p;u|YLRPRIPSPIGFTPG-p;u|SEMKYLGSPITTVPK-p;u|DGPGLERSPGEPGGA-p;u|GVITTTPTPPGQYFY-p;u|IGGSAGASPPSTLTP-p;u…	TKPTLPPSPLMAARR-p;u|DGPGLERSPGEPGGA-p;u|YLRPRIPSPIGFTPG-p;u|PSADRDSSPTTNSKL-p;u|ADREAASSPAGEPLR-p;u|LLPTPPLSPSRRSGL-p;u|GLEQAILSPGQNSGN-p;u|PTYTIPLSPVLSPTL-p;u|SRRSGLCSPSYVAVT-p;u|IVADQTPTPTRFLKN-p;u|SGSLLTRSPTPAPFS-p;u|LTQSAPASPTNKGVH-p;u|ASITSMLSPSFTPTS-p;u|AIKVEPASPPYYSEK-p;u|ILDLISESPIKGRAQ-p;u|SVIVADQTPTPTRFL-p;u|TESITATSPASMVGG-p;u|EEYETPESPVPPARS-p;u|PEGATPTSPVGHFAK-p;u|SPVSVGSSPPVKNIS-p;u…	TKPTLPPSPLMAARR-p;u|GLFNELASPFENEFK-p;u|GAEIVYKSPVVSGDT-p;u|NRAVSLDSPVSVGSS-p;u|ILDLISESPIKGRAQ-p;u|SEMKYLGSPITTVPK-p;u|YLRPRIPSPIGFTPG-p;u|SGYSSPGSPGTPGSR-p;u|NTIDLPMSPRTLDSL-p;u|SRRSGLCSPSYVAVT-p;u|KNSDLLTSPDVGLLK-p;u|SGSLLTRSPTPAPFS-p;u|SGEQAEGSPGGPGDS-p;u|GLEQAILSPGQNSGN-p;u|KTPPAPKTPPSSGEP-p;u|LLPTPPLSPSRRSGL-p;u|PSADRDSSPTTNSKL-p;u|SVIVADQTPTPTRFL-p;u|ADREAASSPAGEPLR-p;u|IVADQTPTPTRFLKN-p;u…	NRAVSLDSPVSVGSS-p;u|ILDLISESPIKGRAQ-p;u|SGSLLTRSPTPAPFS-p;u|TKPTLPPSPLMAARR-p;u|SEMKYLGSPITTVPK-p;u|AIKVEPASPPYYSEK-p;u|PCPQPLRSPSLDNPT-p;u|GLFNELASPFENEFK-p;u|GVITTTPTPPGQYFY-p;u|SRRSGLCSPSYVAVT-p;u|SVIVADQTPTPTRFL-p;u|IVADQTPTPTRFLKN-p;u|VKVNGDASPAAAESG-p;u|NTIDLPMSPRTLDSL-p;u|PTYTIPLSPVLSPTL-p;u|DGPGLERSPGEPGGA-p;u|LTQSAPASPTNKGVH-p;u|ADREAASSPAGEPLR-p;u|EEYETPESPVPPARS-p;u|SPVSVGSSPPVKNIS-p;u…	AIKVEPASPPYYSEK-p;u|NRAVSLDSPVSVGSS-p;u|ILDLISESPIKGRAQ-p;u|VKVNGDASPAAAESG-p;u|NTIDLPMSPRTLDSL-p;u|SVIVADQTPTPTRFL-p;u|IVADQTPTPTRFLKN-p;u|SRRSGLCSPSYVAVT-p;u|GVITTTPTPPGQYFY-p;u|TKPTLPPSPLMAARR-p;u|PTYTIPLSPVLSPTL-p;u|LTQSAPASPTNKGVH-p;u|KNSDLLTSPDVGLLK-p;u|YLRPRIPSPIGFTPG-p;u|SGSLLTRSPTPAPFS-p;u|EEYETPESPVPPARS-p;u|ASITSMLSPSFTPTS-p;u|ADREAASSPAGEPLR-p;u|GLEQAILSPGQNSGN-p;u|TESITATSPASMVGG-p;u…	VKVNGDASPAAAESG-p;u|KKVAVVRTPPKSPSS-p;u|ILDLISESPIKGRAQ-p;u|KTPPAPKTPPSSGEP-p;u|SGYSSPGSPGTPGSR-p;u|SVIVADQTPTPTRFL-p;u|IVADQTPTPTRFLKN-p;u|TESITATSPASMVGG-p;u|DGPGLERSPGEPGGA-p;u|PTYTIPLSPVLSPTL-p;u|ADREAASSPAGEPLR-p;u|PEGATPTSPVGHFAK-p;u|SPVSVGSSPPVKNIS-p;u|EEYETPESPVPPARS-p;u|GLFNELASPFENEFK-p;u|NTIDLPMSPRTLDSL-p;u|LTQSAPASPTNKGVH-p;u|SRRSGLCSPSYVAVT-p;u|ASITSMLSPSFTPTS-p;u|GLEQAILSPGQNSGN-p;u…	ILDLISESPIKGRAQ-p;u|AIKVEPASPPYYSEK-p;u|TKPTLPPSPLMAARR-p;u|PEGATPTSPVGHFAK-p;u|GLFNELASPFENEFK-p;u|SVIVADQTPTPTRFL-p;u|YLRPRIPSPIGFTPG-p;u|LTQSAPASPTNKGVH-p;u|NTIDLPMSPRTLDSL-p;u|SRRSGLCSPSYVAVT-p;u|SPVSVGSSPPVKNIS-p;u|IVADQTPTPTRFLKN-p;u|PTYTIPLSPVLSPTL-p;u|SGSLLTRSPTPAPFS-p;u|GLEQAILSPGQNSGN-p;u|KNSDLLTSPDVGLLK-p;u|VKVNGDASPAAAESG-p;u|ASITSMLSPSFTPTS-p;u|LLPTPPLSPSRRSGL-p;u|SEMKYLGSPITTVPK-p;u…	TESITATSPASMVGG-p;u|TKPTLPPSPLMAARR-p;u|PSADRDSSPTTNSKL-p;u|YLRPRIPSPIGFTPG-p;u|DGPGLERSPGEPGGA-p;u|ADREAASSPAGEPLR-p;u|GVITTTPTPPGQYFY-p;u|LTQSAPASPTNKGVH-p;u|NRAVSLDSPVSVGSS-p;u|SRRSGLCSPSYVAVT-p;u|ASITSMLSPSFTPTS-p;u|GLEQAILSPGQNSGN-p;u|LLPTPPLSPSRRSGL-p;u|SGSLLTRSPTPAPFS-p;u|PTYTIPLSPVLSPTL-p;u|SGEQAEGSPGGPGDS-p;u|SVIVADQTPTPTRFL-p;u|IVADQTPTPTRFLKN-p;u|NTIDLPMSPRTLDSL-p;u|ILDLISESPIKGRAQ-p;u…	TKPTLPPSPLMAARR-p;u|YLRPRIPSPIGFTPG-p;u|SVIVADQTPTPTRFL-p;u|PSADRDSSPTTNSKL-p;u|PEGATPTSPVGHFAK-p;u|GLFNELASPFENEFK-p;u|AIKVEPASPPYYSEK-p;u|NTIDLPMSPRTLDSL-p;u|ILDLISESPIKGRAQ-p;u|LTQSAPASPTNKGVH-p;u|IVADQTPTPTRFLKN-p;u|GLEQAILSPGQNSGN-p;u|GAEIVYKSPVVSGDT-p;u|PTYTIPLSPVLSPTL-p;u|KNSDLLTSPDVGLLK-p;u|ASITSMLSPSFTPTS-p;u|LGLLKLASPELERLI-p;u|PCPQPLRSPSLDNPT-p;u|SGSLLTRSPTPAPFS-p;u|SEMKYLGSPITTVPK-p;u…	TKPTLPPSPLMAARR-p;u|KNSDLLTSPDVGLLK-p;u|VKVNGDASPAAAESG-p;u|LGLLKLASPELERLI-p;u|PCPQPLRSPSLDNPT-p;u|ILDLISESPIKGRAQ-p;u|IVADQTPTPTRFLKN-p;u|SVIVADQTPTPTRFL-p;u|PTYTIPLSPVLSPTL-p;u|GLFNELASPFENEFK-p;u|NTIDLPMSPRTLDSL-p;u|LTQSAPASPTNKGVH-p;u|SPVSVGSSPPVKNIS-p;u|TESITATSPASMVGG-p;u|LLPTPPLSPSRRSGL-p;u|PEGATPTSPVGHFAK-p;u|SEMKYLGSPITTVPK-p;u|YLRPRIPSPIGFTPG-p;u|SGEQAEGSPGGPGDS-p;u|ADREAASSPAGEPLR-p;u…	PCPQPLRSPSLDNPT-p;u|AIKVEPASPPYYSEK-p;u|SGSLLTRSPTPAPFS-p;u|VKVNGDASPAAAESG-p;u|NRAVSLDSPVSVGSS-p;u|ASITSMLSPSFTPTS-p;u|SEMKYLGSPITTVPK-p;u|TESITATSPASMVGG-p;u|SVIVADQTPTPTRFL-p;u|IVADQTPTPTRFLKN-p;u|SRRSGLCSPSYVAVT-p;u|ILDLISESPIKGRAQ-p;u|GVITTTPTPPGQYFY-p;u|LTQSAPASPTNKGVH-p;u|KNSDLLTSPDVGLLK-p;u|PTYTIPLSPVLSPTL-p;u|YLRPRIPSPIGFTPG-p;u|NTIDLPMSPRTLDSL-p;u|ADREAASSPAGEPLR-p;u|SPVSVGSSPPVKNIS-p;u…
KINASE-PSP_SGK1	n=34|APBB1_S610|NDRG1_T346|NEDD4L_S342|NDRG1_T356|NDRG2_T348|NDRG2_T330|CREB1_S133|NEDD4L_T367|NDRG2_S332|MAPT_S214|NCSTN_S437|NDRG2_S346|CDKN1B_T157|CDKN1B_T198|CARHSP1_S52|WNK1_T60|MKNK1_S353|SLC2A4_S274|NDRG1_S330|FOXO3_S315|NEDD4L_S448|MAPK1_S29|WNK4_S1201|PIKFYVE_S318|RICTOR_T1135|MAP2K4_S80|WNK4_S1190|IKBKB_S181|NDRG1_T366|NDRG1_T328|HTT_S419|FBXW7_S227|NFKBIA_S32|WNK4_S1217	33	27.3	27.3	27.3	27.3	27.3	27.3	27.3	24.2	27.3	27.3	27.3	27.3	27.3	27.3	27.3	27.3	27.3	27.3	27.3	27.3	27.3	27.3	27.3	27.3	27.3	27.3	27.3	27.3	24.2	27.3	27.3	27.3	27.3	27.3	27.3	TRLMRSRTASGSSVT-p;u|LMRSRTASGSSVTSL-p;u|PGIMRRNSLSGSSTG-p;u|TRRTRTFSATVRASQ-p;u|IRRPRSLSSPTVTLS-p;u|SSRLRSCSVTDAVAE-p;u|TRLSRSRTASLTSAA-p;u|LSRSRTASLTSAASV-p;u|GGRSRSGSIVELIAG-p;u	IRRPRSLSSPTVTLS-p;u|TRLSRSRTASLTSAA-p;u|LSRSRTASLTSAASV-p;u|PGIMRRNSLSGSSTG-p;u|TRLMRSRTASGSSVT-p;u|LMRSRTASGSSVTSL-p;u|SSRLRSCSVTDAVAE-p;u|GGRSRSGSIVELIAG-p;u|TRRTRTFSATVRASQ-p;u	PGIMRRNSLSGSSTG-p;u|TRLSRSRTASLTSAA-p;u|LSRSRTASLTSAASV-p;u|LMRSRTASGSSVTSL-p;u|GGRSRSGSIVELIAG-p;u|TRLMRSRTASGSSVT-p;u|TRRTRTFSATVRASQ-p;u|SSRLRSCSVTDAVAE-p;u|IRRPRSLSSPTVTLS-p;u	LMRSRTASGSSVTSL-p;u|PGIMRRNSLSGSSTG-p;u|TRLMRSRTASGSSVT-p;u|SSRLRSCSVTDAVAE-p;u|LSRSRTASLTSAASV-p;u|IRRPRSLSSPTVTLS-p;u|TRRTRTFSATVRASQ-p;u|TRLSRSRTASLTSAA-p;u|GGRSRSGSIVELIAG-p;u	PGIMRRNSLSGSSTG-p;u|TRLMRSRTASGSSVT-p;u|LMRSRTASGSSVTSL-p;u|SSRLRSCSVTDAVAE-p;u|TRRTRTFSATVRASQ-p;u|GGRSRSGSIVELIAG-p;u|IRRPRSLSSPTVTLS-p;u|LSRSRTASLTSAASV-p;u|TRLSRSRTASLTSAA-p;u	PGIMRRNSLSGSSTG-p;u|SSRLRSCSVTDAVAE-p;u|LMRSRTASGSSVTSL-p;u|IRRPRSLSSPTVTLS-p;u|TRLMRSRTASGSSVT-p;u|LSRSRTASLTSAASV-p;u|TRLSRSRTASLTSAA-p;u|GGRSRSGSIVELIAG-p;u|TRRTRTFSATVRASQ-p;u	PGIMRRNSLSGSSTG-p;u|TRRTRTFSATVRASQ-p;u|LSRSRTASLTSAASV-p;u|TRLMRSRTASGSSVT-p;u|IRRPRSLSSPTVTLS-p;u|LMRSRTASGSSVTSL-p;u|GGRSRSGSIVELIAG-p;u|TRLSRSRTASLTSAA-p;u|SSRLRSCSVTDAVAE-p;u	PGIMRRNSLSGSSTG-p;u|LMRSRTASGSSVTSL-p;u|TRLMRSRTASGSSVT-p;u|LSRSRTASLTSAASV-p;u|SSRLRSCSVTDAVAE-p;u|GGRSRSGSIVELIAG-p;u|TRLSRSRTASLTSAA-p;u|TRRTRTFSATVRASQ-p;u	LSRSRTASLTSAASV-p;u|TRLMRSRTASGSSVT-p;u|TRRTRTFSATVRASQ-p;u|LMRSRTASGSSVTSL-p;u|TRLSRSRTASLTSAA-p;u|GGRSRSGSIVELIAG-p;u|IRRPRSLSSPTVTLS-p;u|PGIMRRNSLSGSSTG-p;u|SSRLRSCSVTDAVAE-p;u	TRLSRSRTASLTSAA-p;u|LSRSRTASLTSAASV-p;u|TRLMRSRTASGSSVT-p;u|LMRSRTASGSSVTSL-p;u|TRRTRTFSATVRASQ-p;u|GGRSRSGSIVELIAG-p;u|PGIMRRNSLSGSSTG-p;u|IRRPRSLSSPTVTLS-p;u|SSRLRSCSVTDAVAE-p;u	TRLMRSRTASGSSVT-p;u|LMRSRTASGSSVTSL-p;u|IRRPRSLSSPTVTLS-p;u|GGRSRSGSIVELIAG-p;u|PGIMRRNSLSGSSTG-p;u|SSRLRSCSVTDAVAE-p;u|LSRSRTASLTSAASV-p;u|TRRTRTFSATVRASQ-p;u|TRLSRSRTASLTSAA-p;u	PGIMRRNSLSGSSTG-p;u|TRRTRTFSATVRASQ-p;u|TRLSRSRTASLTSAA-p;u|SSRLRSCSVTDAVAE-p;u|LSRSRTASLTSAASV-p;u|TRLMRSRTASGSSVT-p;u|IRRPRSLSSPTVTLS-p;u|GGRSRSGSIVELIAG-p;u|LMRSRTASGSSVTSL-p;u
KINASE-PSP_PKCA/PRKCA	n=388|HRH1_T478|NOS3_T495|TACSTD2_S303|JPH2_S165|MARCKS_S159|TOP1_S21|NOX5_S498|TAGLN2_S185|BEST1_S358|HEXIM1_S158|NCF4_S315|ANXA1_S28|ITGB4_S1360|TRPV1_S801|CYP3A4_T92|PTPN1_S378|MYL9_T10|PLCG1_S1248|MAPT_S352|ADAP1_T276|SLC6A4_T603|ITGB2_S745|GNAZ_S16|DTNB_T179|APPL1_S430|ERBB2_T686|CLDN4_S194|MMP2_T378|C5AR1_S314|LRP1_S4520|ARHGDIA_S34|BLVRA_S230|TNNI3_S199|ABCB1_S661|SLC9A3R1_S340|NR1H4_S135|…	383	13.1	11.5	12.5	12	11.2	11.5	12.8	12	12.3	12.3	12.3	11.5	12	13.3	13.1	12	12.3	13.1	11.2	12.3	12.8	12.8	11.5	13.3	11.2	12.8	12.5	13.1	11.5	12.8	13.1	13.3	13.1	10.4	11.2	FKKSFKLSGFSFKKN-p;u|ATPQRSGSVSNYRSC-p;u|KRFSFKKSFKLSGFS-p;u|HGRAREGSFESRYQQ-p;u|EPLERRLSLVPDSEQ-p;u|CTMKKGPSGYGFNLH-p;u|PKPKPRPSITKATWE-p;u|SFKLSGFSFKKNKKE-p;u|KVIYSQPSARSEGEF-p;u|FGYQRRASDDGKLTD-p;u|SGRPRTTSFAESCKP-p;u|GSRHSLASTDEKREL-p;u|VPRSYPKSNSSKEYV-p;u|NPLMRRNSVTPLASP-p;u|PRTDKPYSAKYSAAR-p;u|GEKSFRRSVVGTPAY-p;u|SGRARTSSFAEPGGG-p;u|QGLAERISVL_____-p;u|GGHGSRHSLASTDEK-p;u|KKKFRTPSFLKKSKK-p;u…	HEILCKLSLEGDHST-p;u|DKMKKSKSVKEDSNL-p;u|KKLERNLSFEIKKVP-p;u|EPLERRLSLVPDSEQ-p;u|KVNASASSLKKKQIW-p;u|SLLMERLSVDYGKKS-p;u|KRFSFKKSFKLSGFS-p;u|SFKLSGFSFKKNKKE-p;u|TLTRDYNSLTRSEHS-p;u|FKKSFKLSGFSFKKN-p;u|KVIYSQPSARSEGEF-p;u|KPFPAPQTPGRLQPA-p;u|YSDDVLRSPSGSQRP-p;u|GEKSFRRSVVGTPAY-p;u|PRTDKPYSAKYSAAR-p;u|GRRSPTSSPTPQRRA-p;u|QGLAERISVL_____-p;u|DMKVRKSSTPEEVKK-p;u|RPHFPQFSYSASGTA-p;u|SGRPRTTSFAESCKP-p;u…	SKSHRRTSLPCIPRE-p;u|SSNDSRSSLIRKRST-p;u|ATPQRSGSVSNYRSC-p;u|VKSRWSGSQQVEQPT-p;u|RQKRSQGSSQFRSQG-p;u|EPLERRLSLVPDSEQ-p;u|TLTRDYNSLTRSEHS-p;u|MGTNRGASQAGMTGY-p;u|VPRSYPKSNSSKEYV-p;u|NDMKVRKSSTPEEVK-p;u|FGYQRRASDDGKLTD-p;u|MTTEQRRSLQAFQDY-p;u|QPSTIATSMRDSLID-p;u|RTPATKRSFSKEVEE-p;u|QGLAERISVL_____-p;u|SGRARTSSFAEPGGG-p;u|SGRPRTTSFAESCKP-p;u|KVIYSQPSARSEGEF-p;u|YSDDVLRSPSGSQRP-p;u|GENPIYKSAVTTVVN-p;u…	ATPQRSGSVSNYRSC-p;u|PKPKPRPSITKATWE-p;u|FGYQRRASDDGKLTD-p;u|SLLMERLSVDYGKKS-p;u|KKKFRTPSFLKKSKK-p;u|SGRPRTTSFAESCKP-p;u|SGRARTSSFAEPGGG-p;u|SSNDSRSSLIRKRST-p;u|RTPATKRSFSKEVEE-p;u|YKPPAQKSIQEIQEL-p;u|HGRAREGSFESRYQQ-p;u|KVIYSQPSARSEGEF-p;u|NPLMRRNSVTPLASP-p;u|KPFPAPQTPGRLQPA-p;u|RQKRSQGSSQFRSQG-p;u|YSDDVLRSPSGSQRP-p;u|EPLERRLSLVPDSEQ-p;u|MGTNRGASQAGMTGY-p;u|QGLAERISVL_____-p;u|VLRSPSGSQRPSVSD-p;u…	TLTRDYNSLTRSEHS-p;u|YSDDVLRSPSGSQRP-p;u|NDMKVRKSSTPEEVK-p;u|ATPQRSGSVSNYRSC-p;u|KKLERNLSFEIKKVP-p;u|KPFPAPQTPGRLQPA-p;u|DMKVRKSSTPEEVKK-p;u|EPLERRLSLVPDSEQ-p;u|SLLMERLSVDYGKKS-p;u|DKMKKSKSVKEDSNL-p;u|SGRARTSSFAEPGGG-p;u|NPLMRRNSVTPLASP-p;u|SGRPRTTSFAESCKP-p;u|RQKRSQGSSQFRSQG-p;u|MTTEQRRSLQAFQDY-p;u|GDKILQVSFKTNKSH-p;u|LDRKRHNSISEAKMR-p;u|PKPKPRPSITKATWE-p;u|RTPATKRSFSKEVEE-p;u|RLSTRPRSLSLQPQL-p;u…	TLTRDYNSLTRSEHS-p;u|EPLERRLSLVPDSEQ-p;u|NPLMRRNSVTPLASP-p;u|PRTDKPYSAKYSAAR-p;u|ATPQRSGSVSNYRSC-p;u|RTPATKRSFSKEVEE-p;u|___MSTRSVSSSSYR-p;u|DMKVRKSSTPEEVKK-p;u|YSDDVLRSPSGSQRP-p;u|MTTEQRRSLQAFQDY-p;u|QGLAERISVL_____-p;u|KPFPAPQTPGRLQPA-p;u|QKQRSAGSFKRNSIK-p;u|KVIYSQPSARSEGEF-p;u|SGRPRTTSFAESCKP-p;u|RQKRSQGSSQFRSQG-p;u|SSNDSRSSLIRKRST-p;u|GGHGSRHSLASTDEK-p;u|GDKILQVSFKTNKSH-p;u|QPSTIATSMRDSLID-p;u…	_MSTRSVSSSSYRRM-p;u|KRFSFKKSFKLSGFS-p;u|HGRAREGSFESRYQQ-p;u|GRRSPTSSPTPQRRA-p;u|FKKSFKLSGFSFKKN-p;u|PKPKPRPSITKATWE-p;u|ATPQRSGSVSNYRSC-p;u|SLLMERLSVDYGKKS-p;u|SFKLSGFSFKKNKKE-p;u|___MSTRSVSSSSYR-p;u|TRSVSSSSYRRMFGG-p;u|GSRHSLASTDEKREL-p;u|LDRKRHNSISEAKMR-p;u|KPFPAPQTPGRLQPA-p;u|NPLMRRNSVTPLASP-p;u|GDKILQVSFKTNKSH-p;u|DMKVRKSSTPEEVKK-p;u|GGHGSRHSLASTDEK-p;u|KKLERNLSFEIKKVP-p;u|PRTDKPYSAKYSAAR-p;u…	EPLERRLSLVPDSEQ-p;u|ATPQRSGSVSNYRSC-p;u|HGRAREGSFESRYQQ-p;u|SLLMERLSVDYGKKS-p;u|KKLERNLSFEIKKVP-p;u|DMKVRKSSTPEEVKK-p;u|FGYQRRASDDGKLTD-p;u|LDRKRHNSISEAKMR-p;u|PKPKPRPSITKATWE-p;u|SRAAGRLSIHSLEAQ-p;u|NDMKVRKSSTPEEVK-p;u|NPLMRRNSVTPLASP-p;u|RQKRSQGSSQFRSQG-p;u|KVIYSQPSARSEGEF-p;u|KPFPAPQTPGRLQPA-p;u|HEILCKLSLEGDHST-p;u|SGRARTSSFAEPGGG-p;u|GGHGSRHSLASTDEK-p;u|CTMKKGPSGYGFNLH-p;u|SGRPRTTSFAESCKP-p;u…	RTPATKRSFSKEVEE-p;u|KVNASASSLKKKQIW-p;u|YSDDVLRSPSGSQRP-p;u|VLRSPSGSQRPSVSD-p;u|TLTRDYNSLTRSEHS-p;u|ATPQRSGSVSNYRSC-p;u|MTTEQRRSLQAFQDY-p;u|QKQRSAGSFKRNSIK-p;u|NPLMRRNSVTPLASP-p;u|CTMKKGPSGYGFNLH-p;u|RQKRSQGSSQFRSQG-p;u|AELEKKLSSERPSSD-p;u|SSNDSRSSLIRKRST-p;u|LKRNRYLSFHFKSGS-p;u|EPLERRLSLVPDSEQ-p;u|GSRHSLASTDEKREL-p;u|KKLERNLSFEIKKVP-p;u|DMKVRKSSTPEEVKK-p;u|QGLAERISVL_____-p;u|SLLMERLSVDYGKKS-p;u…	RTPATKRSFSKEVEE-p;u|TLTRDYNSLTRSEHS-p;u|ATPQRSGSVSNYRSC-p;u|DKMKKSKSVKEDSNL-p;u|QKQRSAGSFKRNSIK-p;u|YSDDVLRSPSGSQRP-p;u|RQKRSQGSSQFRSQG-p;u|GDKILQVSFKTNKSH-p;u|SRAAGRLSIHSLEAQ-p;u|KVNASASSLKKKQIW-p;u|FGYQRRASDDGKLTD-p;u|SGRARTSSFAEPGGG-p;u|GRRSPTSSPTPQRRA-p;u|MGTNRGASQAGMTGY-p;u|QPSTIATSMRDSLID-p;u|EPLERRLSLVPDSEQ-p;u|NDMKVRKSSTPEEVK-p;u|SLLMERLSVDYGKKS-p;u|SGRPRTTSFAESCKP-p;u|NPLMRRNSVTPLASP-p;u…	ATPQRSGSVSNYRSC-p;u|KKLERNLSFEIKKVP-p;u|TLTRDYNSLTRSEHS-p;u|YSDDVLRSPSGSQRP-p;u|SFKLSGFSFKKNKKE-p;u|EPLERRLSLVPDSEQ-p;u|FKKSFKLSGFSFKKN-p;u|VLRSPSGSQRPSVSD-p;u|NPLMRRNSVTPLASP-p;u|VPRSYPKSNSSKEYV-p;u|RQKRSQGSSQFRSQG-p;u|QGLAERISVL_____-p;u|NDMKVRKSSTPEEVK-p;u|KDGATMKTFCGTPEY-p;u|KRFSFKKSFKLSGFS-p;u|GENPIYKSAVTTVVN-p;u|KPFPAPQTPGRLQPA-p;u|SGRPRTTSFAESCKP-p;u|SSNDSRSSLIRKRST-p;u|DMKVRKSSTPEEVKK-p;u…	SFKLSGFSFKKNKKE-p;u|KVIYSQPSARSEGEF-p;u|KRFSFKKSFKLSGFS-p;u|FKKSFKLSGFSFKKN-p;u|DKMKKSKSVKEDSNL-p;u|KKKFRTPSFLKKSKK-p;u|QGLAERISVL_____-p;u|GAILTDTSVKRNDLS-p;u|PKPKPRPSITKATWE-p;u|QKQRSAGSFKRNSIK-p;u|GRRSPTSSPTPQRRA-p;u|TLTRDYNSLTRSEHS-p;u|SRAAGRLSIHSLEAQ-p;u|KKLERNLSFEIKKVP-p;u|GEKSFRRSVVGTPAY-p;u|SGRPRTTSFAESCKP-p;u|ATPQRSGSVSNYRSC-p;u|KPFPAPQTPGRLQPA-p;u|YKPPAQKSIQEIQEL-p;u|SGRARTSSFAEPGGG-p;u…
KINASE-PSP_PKCI/PRKCI	n=29|MARK2_T596|AMOT_T536|GLI1_T304|AMOT_T750|MAPT_S352|BAD_S75|MAPT_S258|EZR_T567|EZH2_T487|SP1_S59|EZH2_S690|CTTN_S261|RPS6KB2_S473|SMARCD3_S247|MARK3_T564|BAD_S118|CDK7_T170|GLI1_S243|MAPT_S324|FBXW7_S10|FBXW7_S18|AMOT_S538|PARD3_S827|MAPT_S293|BAD_S99|EZH2_T345|ELF3_S68|PARD6A_S345|ECT2_T359	29	31	31	31	31	31	31	31	31	31	31	31	31	31	31	31	31	31	31	31	31	31	31	31	31	31	31	31	31	31	31	31	31	31	31	31	REGFGRQSMSEKRTK-p;u|EIRSRHSSYPAGTED-p;u|PFRGRSRSAPPNLWA-p;u|EKLQLHESQKDYKTG-p;u|GGQESQPSPLALLAA-p;u|GRELRRMSDEFVDSF-p;u|GSPNRAYTHQVVTRW-p;u|APAEDVDTPPRKKKR-p;u|YLYEKANTPELKKSV-p;u	GRELRRMSDEFVDSF-p;u|PFRGRSRSAPPNLWA-p;u|EIRSRHSSYPAGTED-p;u|EKLQLHESQKDYKTG-p;u|GSPNRAYTHQVVTRW-p;u|GGQESQPSPLALLAA-p;u|REGFGRQSMSEKRTK-p;u|APAEDVDTPPRKKKR-p;u|YLYEKANTPELKKSV-p;u	REGFGRQSMSEKRTK-p;u|GRELRRMSDEFVDSF-p;u|GGQESQPSPLALLAA-p;u|EIRSRHSSYPAGTED-p;u|YLYEKANTPELKKSV-p;u|APAEDVDTPPRKKKR-p;u|PFRGRSRSAPPNLWA-p;u|GSPNRAYTHQVVTRW-p;u|EKLQLHESQKDYKTG-p;u	GRELRRMSDEFVDSF-p;u|PFRGRSRSAPPNLWA-p;u|EIRSRHSSYPAGTED-p;u|REGFGRQSMSEKRTK-p;u|GGQESQPSPLALLAA-p;u|APAEDVDTPPRKKKR-p;u|GSPNRAYTHQVVTRW-p;u|YLYEKANTPELKKSV-p;u|EKLQLHESQKDYKTG-p;u	YLYEKANTPELKKSV-p;u|EIRSRHSSYPAGTED-p;u|REGFGRQSMSEKRTK-p;u|PFRGRSRSAPPNLWA-p;u|GRELRRMSDEFVDSF-p;u|GGQESQPSPLALLAA-p;u|GSPNRAYTHQVVTRW-p;u|APAEDVDTPPRKKKR-p;u|EKLQLHESQKDYKTG-p;u	EKLQLHESQKDYKTG-p;u|REGFGRQSMSEKRTK-p;u|YLYEKANTPELKKSV-p;u|GGQESQPSPLALLAA-p;u|GRELRRMSDEFVDSF-p;u|EIRSRHSSYPAGTED-p;u|PFRGRSRSAPPNLWA-p;u|GSPNRAYTHQVVTRW-p;u|APAEDVDTPPRKKKR-p;u	GRELRRMSDEFVDSF-p;u|REGFGRQSMSEKRTK-p;u|PFRGRSRSAPPNLWA-p;u|YLYEKANTPELKKSV-p;u|EIRSRHSSYPAGTED-p;u|EKLQLHESQKDYKTG-p;u|GSPNRAYTHQVVTRW-p;u|GGQESQPSPLALLAA-p;u|APAEDVDTPPRKKKR-p;u	GRELRRMSDEFVDSF-p;u|PFRGRSRSAPPNLWA-p;u|REGFGRQSMSEKRTK-p;u|EIRSRHSSYPAGTED-p;u|GSPNRAYTHQVVTRW-p;u|GGQESQPSPLALLAA-p;u|YLYEKANTPELKKSV-p;u|APAEDVDTPPRKKKR-p;u|EKLQLHESQKDYKTG-p;u	REGFGRQSMSEKRTK-p;u|EIRSRHSSYPAGTED-p;u|PFRGRSRSAPPNLWA-p;u|GGQESQPSPLALLAA-p;u|YLYEKANTPELKKSV-p;u|GRELRRMSDEFVDSF-p;u|APAEDVDTPPRKKKR-p;u|GSPNRAYTHQVVTRW-p;u|EKLQLHESQKDYKTG-p;u	REGFGRQSMSEKRTK-p;u|EKLQLHESQKDYKTG-p;u|PFRGRSRSAPPNLWA-p;u|EIRSRHSSYPAGTED-p;u|GRELRRMSDEFVDSF-p;u|GGQESQPSPLALLAA-p;u|YLYEKANTPELKKSV-p;u|APAEDVDTPPRKKKR-p;u|GSPNRAYTHQVVTRW-p;u	GRELRRMSDEFVDSF-p;u|PFRGRSRSAPPNLWA-p;u|EKLQLHESQKDYKTG-p;u|EIRSRHSSYPAGTED-p;u|GGQESQPSPLALLAA-p;u|APAEDVDTPPRKKKR-p;u|REGFGRQSMSEKRTK-p;u|GSPNRAYTHQVVTRW-p;u|YLYEKANTPELKKSV-p;u	EKLQLHESQKDYKTG-p;u|GSPNRAYTHQVVTRW-p;u|PFRGRSRSAPPNLWA-p;u|YLYEKANTPELKKSV-p;u|APAEDVDTPPRKKKR-p;u|EIRSRHSSYPAGTED-p;u|GGQESQPSPLALLAA-p;u|REGFGRQSMSEKRTK-p;u|GRELRRMSDEFVDSF-p;u
KINASE-PSP_PKACA/PRKACA	n=480|GLI1_T374|CUX1_S1270|HIF1A_T700|VASP_S239|RAP1B_S179|CDK16_S119|NOS3_T495|MAP2_S1679|RAF1_S621|PPP2R5D_S573|NOS3_S615|SEC14L2_S289|CIITA_S1050|FAM160B2_S325|HSPA1B_S418|MAPKAPK5_S115|LRRK2_S910|NEDD4L_S342|NCOA3_S857|PPP2R5D_S75|RB1_S780|CUL5_S730|LRP6_T1548|UBE3A_T485|GLI3_S980|PTPN11_S189|CACNA1C_S1535|_S455|PLCG1_S1248|ASIC1_S525|GLI3_S1006|RELA_S45|CASP9_S99|KDELR1_S209|NOXA1_S461|MYBPC…	466	21.5	18.9	20.8	20.8	19.1	18.9	19.7	20.2	19.5	20.2	20.6	19.5	20.8	20.4	20.8	20.8	19.5	21	19.1	20.6	19.7	20.8	19.5	20.4	18.9	19.7	20.2	21.5	20	19.7	20.8	20.4	21.5	18.2	19.1	INSIRKFSIVQKTPL-p;u|HGRAREGSFESRYQQ-p;u|EPLERRLSLVPDSEQ-p;u|PVRMRRNSFTPLSSS-p;u|SLSARKLSLQERPAG-p;u|___MARGSVSDEEMM-p;u|LMRSRTASGSSVTSL-p;u|FGYQRRASDDGKLTD-p;u|FGEKRKNSILNPINS-p;u|SGRPRTTSFAESCKP-p;u|DGGERRPSSTSVPLG-p;u|IRRPRSLSSPTVTLS-p;u|KENPRNFSDNQLQEG-p;u|SRRLRRVSLSEIGFG-p;u|DGRQRRPSTIAEQTV-p;u|NPLMRRNSVTPLASP-p;u|NHPPRKISTEDINKR-p;u|CKIFRRPSLPCISRE-p;u|MEPERRDSQDGSSYR-p;u|SGRARTSSFAEPGGG-p;u…	PVRMRRNSFTPLSSS-p;u|GHGVRRASDPVRTGS-p;u|MEPERRDSQDGSSYR-p;u|KKLERNLSFEIKKVP-p;u|EPLERRLSLVPDSEQ-p;u|RDCSRRSSPVYVGRV-p;u|GSESSRASGLVGRKA-p;u|AVEDRKPSGLNGEAS-p;u|IRRPRSLSSPTVTLS-p;u|RVKGRTWTLCGTPEY-p;u|TRRRRAPSVANVGSH-p;u|SLSARKLSLQERPAG-p;u|PPYNRAVSLDSPVSV-p;u|GRELRRMSDEFVDSF-p;u|PFRGRSRSAPPNLWA-p;u|LSPFRRHSWGPGKNA-p;u|SQRLTRYSQGDDDGS-p;u|GKANRQVSITGFFQR-p;u|GAEIITQSPGRSSVA-p;u|NHPPRKISTEDINKR-p;u…	KKRLRKPSREDDLLA-p;u|AKRKRKNSTGSGHSA-p;u|AVGTRRGSPLLIGVR-p;u|SKSHRRTSLPCIPRE-p;u|KENPRNFSDNQLQEG-p;u|KVAERRSSPLLRRKD-p;u|SNSSPRHSEAATAQR-p;u|NHPPRKISTEDINKR-p;u|PVRMRRNSFTPLSSS-p;u|PKINRSASEPSLHRA-p;u|EPLERRLSLVPDSEQ-p;u|ASPGRPSSVDTLLSP-p;u|SQRQRSTSTPNVHMV-p;u|INSIRKFSIVQKTPL-p;u|CKIFRRPSLPCISRE-p;u|GRELRRMSDEFVDSF-p;u|QDYKKRLSVELTSSL-p;u|FGYQRRASDDGKLTD-p;u|SPKRRRLSSSLNPSK-p;u|QEENRRDSWSYINSK-p;u…	SRRLRRVSLSEIGFG-p;u|LMRSRTASGSSVTSL-p;u|KKRLRKPSREDDLLA-p;u|PVRMRRNSFTPLSSS-p;u|FGYQRRASDDGKLTD-p;u|AKRKRKNSTGSGHSA-p;u|AVGTRRGSPLLIGVR-p;u|VEFQRAQSLLSTDRE-p;u|SGRPRTTSFAESCKP-p;u|SGRARTSSFAEPGGG-p;u|GRELRRMSDEFVDSF-p;u|PFRGRSRSAPPNLWA-p;u|GKANRQVSITGFFQR-p;u|HGRAREGSFESRYQQ-p;u|MEPERRDSQDGSSYR-p;u|NPLMRRNSVTPLASP-p;u|GAGGRRLSSFVTKGY-p;u|SSRLRSCSVTDAVAE-p;u|AVEDRKPSGLNGEAS-p;u|NHPPRKISTEDINKR-p;u…	LPGARRGSAGLAKKC-p;u|NHPPRKISTEDINKR-p;u|MIRRRRPTPAMLFRL-p;u|DGGERRPSSTSVPLG-p;u|GSESSRASGLVGRKA-p;u|KKLERNLSFEIKKVP-p;u|QDTQRRTSMGGTQQQ-p;u|PPYNRAVSLDSPVSV-p;u|GAGGRRLSSFVTKGY-p;u|SLSARKLSLQERPAG-p;u|EPLERRLSLVPDSEQ-p;u|RVKGRTWTLCGTPEY-p;u|QDYKKRLSVELTSSL-p;u|RREERSMSAPGNLLV-p;u|SRRLRRVSLSEIGFG-p;u|ATKAARKSAPSTGGV-p;u|LTEERDGSLNQSSGY-p;u|MEPERRDSQDGSSYR-p;u|NGATEQRTSSKESSP-p;u|GAEIITQSPGRSSVA-p;u…	EPLERRLSLVPDSEQ-p;u|LPGARRGSAGLAKKC-p;u|NPLMRRNSVTPLASP-p;u|PVRMRRNSFTPLSSS-p;u|AVGTRRGSPLLIGVR-p;u|PPYNRAVSLDSPVSV-p;u|QDTQRRTSMGGTQQQ-p;u|SSRLRSCSVTDAVAE-p;u|LMRSRTASGSSVTSL-p;u|QDYKKRLSVELTSSL-p;u|SPKRRRLSSSLNPSK-p;u|DGGERRPSSTSVPLG-p;u|KKRLRKPSREDDLLA-p;u|KENPRNFSDNQLQEG-p;u|MIRRRRPTPAMLFRL-p;u|IRRPRSLSSPTVTLS-p;u|CKIFRRPSLPCISRE-p;u|ASPGRPSSVDTLLSP-p;u|RAGSRRGSFDATGSG-p;u|RVKGRTWTLCGTPEY-p;u…	GSSTRKDSIPQVLLP-p;u|SAVRLRSSVPGVRLL-p;u|DGGERRPSSTSVPLG-p;u|PFGSRRSSAIGIENI-p;u|GHGVRRASDPVRTGS-p;u|RALSRQLSSGVSEIR-p;u|TTSTRTYSLGSALRP-p;u|SSGARRPSLDSMENQ-p;u|HGRAREGSFESRYQQ-p;u|AVGTRRGSPLLIGVR-p;u|KENPRNFSDNQLQEG-p;u|GAGGRRLSSFVTKGY-p;u|CKIFRRPSLPCISRE-p;u|SLSARKLSLQERPAG-p;u|EGPTRRLSLPGQLGA-p;u|NHPPRKISTEDINKR-p;u|GAKLRKVSKQEEASG-p;u|GGFPRRHSVTLPSSK-p;u|NRFTRRASVCAEAYN-p;u|DGRQRRPSTIAEQTV-p;u…	AVEDRKPSGLNGEAS-p;u|INSIRKFSIVQKTPL-p;u|LPGARRGSAGLAKKC-p;u|KENPRNFSDNQLQEG-p;u|GAKLRKVSKQEEASG-p;u|EPLERRLSLVPDSEQ-p;u|AVGTRRGSPLLIGVR-p;u|GAGGRRLSSFVTKGY-p;u|MIRRRRPTPAMLFRL-p;u|SLSARKLSLQERPAG-p;u|NHPPRKISTEDINKR-p;u|GKANRQVSITGFFQR-p;u|PVRMRRNSFTPLSSS-p;u|QDTQRRTSMGGTQQQ-p;u|HGRAREGSFESRYQQ-p;u|AKRKRKNSTGSGHSA-p;u|KKLERNLSFEIKKVP-p;u|SPKRRRLSSSLNPSK-p;u|KKRLRKPSREDDLLA-p;u|FGEKRKNSILNPINS-p;u…	GSESSRASGLVGRKA-p;u|NRFTRRASVCAEAYN-p;u|SQRLTRYSQGDDDGS-p;u|KVAERRSSPLLRRKD-p;u|KKRLRKPSREDDLLA-p;u|PVRMRRNSFTPLSSS-p;u|GGFPRRHSVTLPSSK-p;u|RALSRQLSSGVSEIR-p;u|SLSARKLSLQERPAG-p;u|YQQKPYPSPKTIEDL-p;u|SNSSPRHSEAATAQR-p;u|DGGERRPSSTSVPLG-p;u|PFGSRRSSAIGIENI-p;u|EIRSRHSSYPAGTED-p;u|RAGSRRGSFDATGSG-p;u|NGATEQRTSSKESSP-p;u|VEFQRAQSLLSTDRE-p;u|HSSRRRGSISSGVSY-p;u|AKRKRKNSTGSGHSA-p;u|RAPSRKDSLESDSST-p;u…	KENPRNFSDNQLQEG-p;u|PVRMRRNSFTPLSSS-p;u|KKRLRKPSREDDLLA-p;u|KVAERRSSPLLRRKD-p;u|AVGTRRGSPLLIGVR-p;u|LPGARRGSAGLAKKC-p;u|LMRSRTASGSSVTSL-p;u|RALSRQLSSGVSEIR-p;u|FGYQRRASDDGKLTD-p;u|RAGSRRGSFDATGSG-p;u|SGRARTSSFAEPGGG-p;u|MIRRRRPTPAMLFRL-p;u|EPLERRLSLVPDSEQ-p;u|CKIFRRPSLPCISRE-p;u|DTQIKRNTFVGTPFW-p;u|QDYKKRLSVELTSSL-p;u|QDTQRRTSMGGTQQQ-p;u|GGFPRRHSVTLPSSK-p;u|GAKLRKVSKQEEASG-p;u|SGRPRTTSFAESCKP-p;u…	KKRLRKPSREDDLLA-p;u|RALSRQLSSGVSEIR-p;u|KENPRNFSDNQLQEG-p;u|DRAAKRLSLESEGAG-p;u|KKLERNLSFEIKKVP-p;u|INSIRKFSIVQKTPL-p;u|EPLERRLSLVPDSEQ-p;u|MIRRRRPTPAMLFRL-p;u|LPGARRGSAGLAKKC-p;u|GRELRRMSDEFVDSF-p;u|PVRMRRNSFTPLSSS-p;u|PPRIHRASDPGLPAE-p;u|NPLMRRNSVTPLASP-p;u|GAGGRRLSSFVTKGY-p;u|LMRSRTASGSSVTSL-p;u|NHPPRKISTEDINKR-p;u|AVGTRRGSPLLIGVR-p;u|AVEDRKPSGLNGEAS-p;u|SGKFRRGSGSACSLL-p;u|DGGERRPSSTSVPLG-p;u…	DRAAKRLSLESEGAG-p;u|CKIFRRPSLPCISRE-p;u|LSPFRRHSWGPGKNA-p;u|KKLERNLSFEIKKVP-p;u|PFGSRRSSAIGIENI-p;u|DASQRRRSLEPAENV-p;u|IAEPMRRSVSEAALA-p;u|SGRPRTTSFAESCKP-p;u|QDYKKRLSVELTSSL-p;u|LPGARRGSAGLAKKC-p;u|SNSSPRHSEAATAQR-p;u|AVGTRRGSPLLIGVR-p;u|PVRMRRNSFTPLSSS-p;u|DQRQRSLSTSGESLY-p;u|SGRARTSSFAEPGGG-p;u|GKANRQVSITGFFQR-p;u|SLSARKLSLQERPAG-p;u|MEPERRDSQDGSSYR-p;u|PPYNRAVSLDSPVSV-p;u|DTQIKRNTFVGTPFW-p;u…
KINASE-PSP_JNK2/MAPK9	n=49|DCX_T331|MAPT_T231|MAPT_S202|ATF2_T69|MYC_S71|APP_T668|PSEN1_T320|CDKN1A_S130|ATF2_T71|RXRA_S260|JDP2_T148|TOB1_S154|BCL2L1_T47|NFATC4_S217|TOB1_S152|MAPT_T217|NFATC4_S213|PDX1_S66|NFATC3_S165|BCL2L1_T115|JUN_S73|ATF2_S90|BAZ1B_S158|CDC25C_S168|SLC6A4_T616|TP53_S20|MAPT_T181|BID_T59|MAPKAPK5_T182|MARCKS_S46|JUN_S63|MYC_S62|CDK4_T172|PDX1_S61|MAPT_T212|PSEN1_S319|DCX_T321|NFATC3_S163|MAPK8IP1…	49	32.7	32.7	34.7	30.6	34.7	32.7	34.7	30.6	32.7	34.7	32.7	32.7	30.6	34.7	34.7	30.6	32.7	34.7	34.7	34.7	34.7	34.7	32.7	34.7	32.7	34.7	34.7	32.7	30.6	34.7	34.7	34.7	32.7	32.7	34.7	SEMKYLGSPITTVPK-p;u|VKVNGDASPAAAESG-p;u|GLFNELASPFENEFK-p;u|IDQGDLMTPQFTPYY-p;u|VRTDSVKTPESEGNP-p;u|SVIVADQTPTPTRFL-p;u|IVADQTPTPTRFLKN-p;u|SPISTPTSPGSLRKH-p;u|SRRSGLCSPSYVAVT-p;u|TPGSRSRTPSLPTPP-p;u|KSDGACDSPSSDKEN-p;u|KNSDLLTSPDVGLLK-p;u|LLPTPPLSPSRRSGL-p;u|KTPPAPKTPPSSGEP-p;u|SGEQAEGSPGGPGDS-p;u|SGYSSPGSPGTPGSR-p;u	VRTDSVKTPESEGNP-p;u|SGEQAEGSPGGPGDS-p;u|VKVNGDASPAAAESG-p;u|SPISTPTSPGSLRKH-p;u|KNSDLLTSPDVGLLK-p;u|SVIVADQTPTPTRFL-p;u|IVADQTPTPTRFLKN-p;u|SEMKYLGSPITTVPK-p;u|IDQGDLMTPQFTPYY-p;u|SRRSGLCSPSYVAVT-p;u|TPGSRSRTPSLPTPP-p;u|KTPPAPKTPPSSGEP-p;u|LLPTPPLSPSRRSGL-p;u|SGYSSPGSPGTPGSR-p;u|KSDGACDSPSSDKEN-p;u|KKVAVVRTPPKSPSS-p;u	IDQGDLMTPQFTPYY-p;u|LLPTPPLSPSRRSGL-p;u|SRRSGLCSPSYVAVT-p;u|IVADQTPTPTRFLKN-p;u|SPISTPTSPGSLRKH-p;u|VRTDSVKTPESEGNP-p;u|SVIVADQTPTPTRFL-p;u|TPGSRSRTPSLPTPP-p;u|KSDGACDSPSSDKEN-p;u|GLFNELASPFENEFK-p;u|SEMKYLGSPITTVPK-p;u|SGEQAEGSPGGPGDS-p;u|VKVNGDASPAAAESG-p;u|KTPPAPKTPPSSGEP-p;u|KNSDLLTSPDVGLLK-p;u|SGYSSPGSPGTPGSR-p;u|KKVAVVRTPPKSPSS-p;u	IDQGDLMTPQFTPYY-p;u|GLFNELASPFENEFK-p;u|VRTDSVKTPESEGNP-p;u|SEMKYLGSPITTVPK-p;u|SGYSSPGSPGTPGSR-p;u|SRRSGLCSPSYVAVT-p;u|KNSDLLTSPDVGLLK-p;u|SGEQAEGSPGGPGDS-p;u|TPGSRSRTPSLPTPP-p;u|KTPPAPKTPPSSGEP-p;u|LLPTPPLSPSRRSGL-p;u|SVIVADQTPTPTRFL-p;u|IVADQTPTPTRFLKN-p;u|KSDGACDSPSSDKEN-p;u|VKVNGDASPAAAESG-p;u	IDQGDLMTPQFTPYY-p;u|SEMKYLGSPITTVPK-p;u|GLFNELASPFENEFK-p;u|VRTDSVKTPESEGNP-p;u|SRRSGLCSPSYVAVT-p;u|SVIVADQTPTPTRFL-p;u|IVADQTPTPTRFLKN-p;u|SPISTPTSPGSLRKH-p;u|VKVNGDASPAAAESG-p;u|KSDGACDSPSSDKEN-p;u|LLPTPPLSPSRRSGL-p;u|KNSDLLTSPDVGLLK-p;u|TPGSRSRTPSLPTPP-p;u|KTPPAPKTPPSSGEP-p;u|SGEQAEGSPGGPGDS-p;u|SGYSSPGSPGTPGSR-p;u|KKVAVVRTPPKSPSS-p;u	VKVNGDASPAAAESG-p;u|IDQGDLMTPQFTPYY-p;u|VRTDSVKTPESEGNP-p;u|SVIVADQTPTPTRFL-p;u|IVADQTPTPTRFLKN-p;u|SRRSGLCSPSYVAVT-p;u|SPISTPTSPGSLRKH-p;u|KNSDLLTSPDVGLLK-p;u|KSDGACDSPSSDKEN-p;u|TPGSRSRTPSLPTPP-p;u|SEMKYLGSPITTVPK-p;u|LLPTPPLSPSRRSGL-p;u|SGYSSPGSPGTPGSR-p;u|KTPPAPKTPPSSGEP-p;u|SGEQAEGSPGGPGDS-p;u|KKVAVVRTPPKSPSS-p;u	SPISTPTSPGSLRKH-p;u|TPGSRSRTPSLPTPP-p;u|VKVNGDASPAAAESG-p;u|KKVAVVRTPPKSPSS-p;u|IDQGDLMTPQFTPYY-p;u|KTPPAPKTPPSSGEP-p;u|SGYSSPGSPGTPGSR-p;u|SVIVADQTPTPTRFL-p;u|IVADQTPTPTRFLKN-p;u|VRTDSVKTPESEGNP-p;u|KSDGACDSPSSDKEN-p;u|GLFNELASPFENEFK-p;u|SRRSGLCSPSYVAVT-p;u|KNSDLLTSPDVGLLK-p;u|LLPTPPLSPSRRSGL-p;u|SEMKYLGSPITTVPK-p;u|SGEQAEGSPGGPGDS-p;u	IDQGDLMTPQFTPYY-p;u|GLFNELASPFENEFK-p;u|SVIVADQTPTPTRFL-p;u|SRRSGLCSPSYVAVT-p;u|IVADQTPTPTRFLKN-p;u|KNSDLLTSPDVGLLK-p;u|VKVNGDASPAAAESG-p;u|VRTDSVKTPESEGNP-p;u|KSDGACDSPSSDKEN-p;u|TPGSRSRTPSLPTPP-p;u|LLPTPPLSPSRRSGL-p;u|SEMKYLGSPITTVPK-p;u|KTPPAPKTPPSSGEP-p;u|SGYSSPGSPGTPGSR-p;u|SGEQAEGSPGGPGDS-p;u	IDQGDLMTPQFTPYY-p;u|SRRSGLCSPSYVAVT-p;u|LLPTPPLSPSRRSGL-p;u|KSDGACDSPSSDKEN-p;u|SGEQAEGSPGGPGDS-p;u|SVIVADQTPTPTRFL-p;u|IVADQTPTPTRFLKN-p;u|VKVNGDASPAAAESG-p;u|KNSDLLTSPDVGLLK-p;u|SEMKYLGSPITTVPK-p;u|VRTDSVKTPESEGNP-p;u|GLFNELASPFENEFK-p;u|TPGSRSRTPSLPTPP-p;u|KTPPAPKTPPSSGEP-p;u|KKVAVVRTPPKSPSS-p;u|SGYSSPGSPGTPGSR-p;u	VRTDSVKTPESEGNP-p;u|IDQGDLMTPQFTPYY-p;u|SVIVADQTPTPTRFL-p;u|GLFNELASPFENEFK-p;u|IVADQTPTPTRFLKN-p;u|SPISTPTSPGSLRKH-p;u|KNSDLLTSPDVGLLK-p;u|SEMKYLGSPITTVPK-p;u|SRRSGLCSPSYVAVT-p;u|VKVNGDASPAAAESG-p;u|TPGSRSRTPSLPTPP-p;u|KSDGACDSPSSDKEN-p;u|LLPTPPLSPSRRSGL-p;u|SGEQAEGSPGGPGDS-p;u|KTPPAPKTPPSSGEP-p;u|SGYSSPGSPGTPGSR-p;u|KKVAVVRTPPKSPSS-p;u	KNSDLLTSPDVGLLK-p;u|VKVNGDASPAAAESG-p;u|VRTDSVKTPESEGNP-p;u|IDQGDLMTPQFTPYY-p;u|KSDGACDSPSSDKEN-p;u|SPISTPTSPGSLRKH-p;u|IVADQTPTPTRFLKN-p;u|SVIVADQTPTPTRFL-p;u|GLFNELASPFENEFK-p;u|LLPTPPLSPSRRSGL-p;u|SEMKYLGSPITTVPK-p;u|SGEQAEGSPGGPGDS-p;u|SRRSGLCSPSYVAVT-p;u|KTPPAPKTPPSSGEP-p;u|SGYSSPGSPGTPGSR-p;u|KKVAVVRTPPKSPSS-p;u	VKVNGDASPAAAESG-p;u|IDQGDLMTPQFTPYY-p;u|SEMKYLGSPITTVPK-p;u|SVIVADQTPTPTRFL-p;u|IVADQTPTPTRFLKN-p;u|SRRSGLCSPSYVAVT-p;u|KNSDLLTSPDVGLLK-p;u|KSDGACDSPSSDKEN-p;u|SPISTPTSPGSLRKH-p;u|VRTDSVKTPESEGNP-p;u|LLPTPPLSPSRRSGL-p;u|TPGSRSRTPSLPTPP-p;u|KTPPAPKTPPSSGEP-p;u|SGYSSPGSPGTPGSR-p;u|SGEQAEGSPGGPGDS-p;u|KKVAVVRTPPKSPSS-p;u
KINASE-PSP_CDK3	n=12|LIN9_T96|NFATC4_S259|ESR1_S118|ESR1_S106|ESR1_S104|JUN_S73|ATF1_S63|JUN_S63|TFCP2_S309|CABLES1_S313|RB1_S807|RB1_S811	12	41.7	41.7	41.7	41.7	41.7	41.7	41.7	33.3	41.7	33.3	41.7	41.7	41.7	41.7	41.7	41.7	41.7	41.7	41.7	41.7	41.7	41.7	41.7	41.7	41.7	41.7	33.3	41.7	41.7	41.7	41.7	41.7	41.7	41.7	41.7	RCRTLSGSPRPKNFK-p;u|KFTATMSTPDKKASQ-p;u|IYISPLKSPYKISEG-p;u|PGGNIYISPLKSPYK-p;u|KNSDLLTSPDVGLLK-p;u	KNSDLLTSPDVGLLK-p;u|RCRTLSGSPRPKNFK-p;u|KFTATMSTPDKKASQ-p;u|PGGNIYISPLKSPYK-p;u|IYISPLKSPYKISEG-p;u	KFTATMSTPDKKASQ-p;u|PGGNIYISPLKSPYK-p;u|IYISPLKSPYKISEG-p;u|RCRTLSGSPRPKNFK-p;u|KNSDLLTSPDVGLLK-p;u	KNSDLLTSPDVGLLK-p;u|KFTATMSTPDKKASQ-p;u|IYISPLKSPYKISEG-p;u|PGGNIYISPLKSPYK-p;u|RCRTLSGSPRPKNFK-p;u	KFTATMSTPDKKASQ-p;u|IYISPLKSPYKISEG-p;u|PGGNIYISPLKSPYK-p;u|RCRTLSGSPRPKNFK-p;u|KNSDLLTSPDVGLLK-p;u	IYISPLKSPYKISEG-p;u|PGGNIYISPLKSPYK-p;u|KNSDLLTSPDVGLLK-p;u|RCRTLSGSPRPKNFK-p;u|KFTATMSTPDKKASQ-p;u	KFTATMSTPDKKASQ-p;u|PGGNIYISPLKSPYK-p;u|IYISPLKSPYKISEG-p;u|RCRTLSGSPRPKNFK-p;u|KNSDLLTSPDVGLLK-p;u	KNSDLLTSPDVGLLK-p;u|KFTATMSTPDKKASQ-p;u|PGGNIYISPLKSPYK-p;u|IYISPLKSPYKISEG-p;u	RCRTLSGSPRPKNFK-p;u|KFTATMSTPDKKASQ-p;u|KNSDLLTSPDVGLLK-p;u|IYISPLKSPYKISEG-p;u|PGGNIYISPLKSPYK-p;u	KNSDLLTSPDVGLLK-p;u|KFTATMSTPDKKASQ-p;u|PGGNIYISPLKSPYK-p;u|IYISPLKSPYKISEG-p;u	KNSDLLTSPDVGLLK-p;u|RCRTLSGSPRPKNFK-p;u|IYISPLKSPYKISEG-p;u|PGGNIYISPLKSPYK-p;u|KFTATMSTPDKKASQ-p;u	RCRTLSGSPRPKNFK-p;u|KFTATMSTPDKKASQ-p;u|KNSDLLTSPDVGLLK-p;u|IYISPLKSPYKISEG-p;u|PGGNIYISPLKSPYK-p;u
KINASE-PSP_PRKD2	n=14|VASP_S239|SSH1_S978|HDAC5_S498|PKD2_S801|MARK2_S400|PI4KB_S294|SET_S171|PRKD2_S876|ITGB4_T1736|RIN1_S292|SSH1_S937|VASP_S157|CIB1_S78|VASP_S322	14	42.9	42.9	42.9	42.9	35.7	42.9	42.9	35.7	35.7	35.7	28.6	28.6	42.9	42.9	35.7	42.9	35.7	35.7	35.7	42.9	42.9	35.7	28.6	42.9	42.9	42.9	35.7	42.9	28.6	42.9	35.7	42.9	42.9	35.7	35.7	QLLRRESSVGYRVPA-p;u|QGLAERISVL_____-p;u|GAKLRKVSKQEEASG-p;u|RPLSRTQSSPLPQSP-p;u|SNLKRTASNPKVENE-p;u|TTLPRMKSSSSVTTS-p;u	QGLAERISVL_____-p;u|GAKLRKVSKQEEASG-p;u|SNLKRTASNPKVENE-p;u|QLLRRESSVGYRVPA-p;u|TTLPRMKSSSSVTTS-p;u|RPLSRTQSSPLPQSP-p;u	QLLRRESSVGYRVPA-p;u|TTLPRMKSSSSVTTS-p;u|QGLAERISVL_____-p;u|RPLSRTQSSPLPQSP-p;u|GAKLRKVSKQEEASG-p;u|SNLKRTASNPKVENE-p;u	QLLRRESSVGYRVPA-p;u|GAKLRKVSKQEEASG-p;u|SNLKRTASNPKVENE-p;u|QGLAERISVL_____-p;u|TTLPRMKSSSSVTTS-p;u|RPLSRTQSSPLPQSP-p;u	TTLPRMKSSSSVTTS-p;u|QGLAERISVL_____-p;u|SNLKRTASNPKVENE-p;u|RPLSRTQSSPLPQSP-p;u|QLLRRESSVGYRVPA-p;u	QGLAERISVL_____-p;u|QLLRRESSVGYRVPA-p;u|TTLPRMKSSSSVTTS-p;u|RPLSRTQSSPLPQSP-p;u|GAKLRKVSKQEEASG-p;u|SNLKRTASNPKVENE-p;u	GAKLRKVSKQEEASG-p;u|TTLPRMKSSSSVTTS-p;u|RPLSRTQSSPLPQSP-p;u|QGLAERISVL_____-p;u|SNLKRTASNPKVENE-p;u|QLLRRESSVGYRVPA-p;u	GAKLRKVSKQEEASG-p;u|TTLPRMKSSSSVTTS-p;u|SNLKRTASNPKVENE-p;u|QGLAERISVL_____-p;u|RPLSRTQSSPLPQSP-p;u	SNLKRTASNPKVENE-p;u|QGLAERISVL_____-p;u|RPLSRTQSSPLPQSP-p;u|TTLPRMKSSSSVTTS-p;u|QLLRRESSVGYRVPA-p;u	SNLKRTASNPKVENE-p;u|TTLPRMKSSSSVTTS-p;u|GAKLRKVSKQEEASG-p;u|QGLAERISVL_____-p;u|RPLSRTQSSPLPQSP-p;u	TTLPRMKSSSSVTTS-p;u|QLLRRESSVGYRVPA-p;u|QGLAERISVL_____-p;u|SNLKRTASNPKVENE-p;u	TTLPRMKSSSSVTTS-p;u|QLLRRESSVGYRVPA-p;u|QGLAERISVL_____-p;u|SNLKRTASNPKVENE-p;u
KINASE-PSP_CDK7	n=41|CDK11B_T595|MCM2_S5|CDK2_Y168|ESR1_S118|CDK6_T177|TP53_S371|MCM2_S41|CDK9_S175|POLR2A_S1616|MCM2_S13|RARA_S77|XRN2_T439|TP53_S376|E2F1_T433|CDK2_T160|POLR2A_S1621|CDK4_T172|TP53_S378|SMAD1_S206|CDK1_T161|MCM2_S4|TP53_S392|PCGF6_S30|TP53_S33|POLR2A_S1619|MCM2_S108|RARG_S79|CDK12_T893|MCM2_S40|MCM2_T59|MCM2_S53|MCM2_S139|E2F1_S403|RARG_S77|MCM2_S27|CDK2_S46|CDK2_T165|POLR2A_S1878|MCM2_S7|AR_S5…	41	24.4	24.4	24.4	24.4	24.4	24.4	24.4	24.4	24.4	24.4	24.4	24.4	24.4	22	22	24.4	24.4	24.4	24.4	24.4	24.4	22	24.4	22	24.4	24.4	24.4	24.4	24.4	24.4	22	22	24.4	24.4	24.4	GIPIRVYTHEVVTLW-p;u|GSPLKAYTPVVVTLW-p;u|GVPVRTYTHEVVTLW-p;u|SEESRPYTNKVITLW-p;u|SPKYSPTSPTYSPTT-p;u|DVEELTASQREAAER-p;u|RRGLLYDSDEEDEER-p;u|RTDALTSSPGRDLPP-p;u|RRTDALTSSPGRDLP-p;u|GNDPLTSSPGRSSRR-p;u	RRGLLYDSDEEDEER-p;u|GSPLKAYTPVVVTLW-p;u|DVEELTASQREAAER-p;u|GNDPLTSSPGRSSRR-p;u|GIPIRVYTHEVVTLW-p;u|GVPVRTYTHEVVTLW-p;u|RRTDALTSSPGRDLP-p;u|SEESRPYTNKVITLW-p;u|SPKYSPTSPTYSPTT-p;u|RTDALTSSPGRDLPP-p;u	GSPLKAYTPVVVTLW-p;u|RRGLLYDSDEEDEER-p;u|GNDPLTSSPGRSSRR-p;u|RTDALTSSPGRDLPP-p;u|RRTDALTSSPGRDLP-p;u|DVEELTASQREAAER-p;u|SPKYSPTSPTYSPTT-p;u|GIPIRVYTHEVVTLW-p;u|SEESRPYTNKVITLW-p;u|GVPVRTYTHEVVTLW-p;u	GVPVRTYTHEVVTLW-p;u|GIPIRVYTHEVVTLW-p;u|GSPLKAYTPVVVTLW-p;u|SPKYSPTSPTYSPTT-p;u|SEESRPYTNKVITLW-p;u|DVEELTASQREAAER-p;u|RRTDALTSSPGRDLP-p;u|RRGLLYDSDEEDEER-p;u|GNDPLTSSPGRSSRR-p;u|RTDALTSSPGRDLPP-p;u	GIPIRVYTHEVVTLW-p;u|SEESRPYTNKVITLW-p;u|DVEELTASQREAAER-p;u|RRGLLYDSDEEDEER-p;u|GVPVRTYTHEVVTLW-p;u|SPKYSPTSPTYSPTT-p;u|GNDPLTSSPGRSSRR-p;u|RRTDALTSSPGRDLP-p;u|RTDALTSSPGRDLPP-p;u|GSPLKAYTPVVVTLW-p;u	GSPLKAYTPVVVTLW-p;u|SEESRPYTNKVITLW-p;u|SPKYSPTSPTYSPTT-p;u|DVEELTASQREAAER-p;u|GIPIRVYTHEVVTLW-p;u|GNDPLTSSPGRSSRR-p;u|RRGLLYDSDEEDEER-p;u|GVPVRTYTHEVVTLW-p;u|RRTDALTSSPGRDLP-p;u|RTDALTSSPGRDLPP-p;u	GIPIRVYTHEVVTLW-p;u|SEESRPYTNKVITLW-p;u|GSPLKAYTPVVVTLW-p;u|DVEELTASQREAAER-p;u|GVPVRTYTHEVVTLW-p;u|GNDPLTSSPGRSSRR-p;u|RRGLLYDSDEEDEER-p;u|SPKYSPTSPTYSPTT-p;u|RRTDALTSSPGRDLP-p;u|RTDALTSSPGRDLPP-p;u	SEESRPYTNKVITLW-p;u|GSPLKAYTPVVVTLW-p;u|SPKYSPTSPTYSPTT-p;u|GIPIRVYTHEVVTLW-p;u|DVEELTASQREAAER-p;u|GVPVRTYTHEVVTLW-p;u|RRTDALTSSPGRDLP-p;u|RRGLLYDSDEEDEER-p;u|GNDPLTSSPGRSSRR-p;u|RTDALTSSPGRDLPP-p;u	GSPLKAYTPVVVTLW-p;u|SPKYSPTSPTYSPTT-p;u|RRGLLYDSDEEDEER-p;u|DVEELTASQREAAER-p;u|GIPIRVYTHEVVTLW-p;u|GNDPLTSSPGRSSRR-p;u|GVPVRTYTHEVVTLW-p;u|RRTDALTSSPGRDLP-p;u|RTDALTSSPGRDLPP-p;u|SEESRPYTNKVITLW-p;u	GSPLKAYTPVVVTLW-p;u|DVEELTASQREAAER-p;u|GIPIRVYTHEVVTLW-p;u|RRGLLYDSDEEDEER-p;u|SPKYSPTSPTYSPTT-p;u|SEESRPYTNKVITLW-p;u|GNDPLTSSPGRSSRR-p;u|RRTDALTSSPGRDLP-p;u|RTDALTSSPGRDLPP-p;u|GVPVRTYTHEVVTLW-p;u	GSPLKAYTPVVVTLW-p;u|RRTDALTSSPGRDLP-p;u|DVEELTASQREAAER-p;u|RRGLLYDSDEEDEER-p;u|RTDALTSSPGRDLPP-p;u|SPKYSPTSPTYSPTT-p;u|GIPIRVYTHEVVTLW-p;u|SEESRPYTNKVITLW-p;u|GNDPLTSSPGRSSRR-p;u|GVPVRTYTHEVVTLW-p;u	SEESRPYTNKVITLW-p;u|GSPLKAYTPVVVTLW-p;u|GIPIRVYTHEVVTLW-p;u|DVEELTASQREAAER-p;u|GVPVRTYTHEVVTLW-p;u|SPKYSPTSPTYSPTT-p;u|RRTDALTSSPGRDLP-p;u|RRGLLYDSDEEDEER-p;u|RTDALTSSPGRDLPP-p;u|GNDPLTSSPGRSSRR-p;u
KINASE-PSP_P38D/MAPK13	n=14|EEF2K_S396|EEF2K_S359|MAPT_T217|HSF1_S307|MAPT_S396|MAPT_S404|HSF1_S303|STMN1_S25|MAPT_T212|HSF1_S326|STMN1_S38|SQSTM1_T269|SQSTM1_S272|CCND3_T283	14	71.4	71.4	71.4	71.4	71.4	71.4	64.3	71.4	71.4	71.4	57.1	71.4	71.4	64.3	64.3	71.4	71.4	71.4	71.4	71.4	64.3	64.3	71.4	64.3	71.4	64.3	71.4	71.4	71.4	64.3	64.3	64.3	71.4	71.4	71.4	QAFELILSPRSKESV-p;u|SSVDTLLSPTALIDS-p;u|EPPSPPQSPRVEEAS-p;u|GGKRSRLTPVSPESS-p;u|RSRLTPVSPESSSTE-p;u|SVPEFPLSPPKKKDL-p;u|RVKEEPPSPPQSPRV-p;u|TPGSRSRTPSLPTPP-p;u|GAEIVYKSPVVSGDT-p;u|PVVSGDTSPRHLSNV-p;u	RVKEEPPSPPQSPRV-p;u|EPPSPPQSPRVEEAS-p;u|SVPEFPLSPPKKKDL-p;u|GGKRSRLTPVSPESS-p;u|QAFELILSPRSKESV-p;u|RSRLTPVSPESSSTE-p;u|SSVDTLLSPTALIDS-p;u|TPGSRSRTPSLPTPP-p;u|GAEIVYKSPVVSGDT-p;u|PVVSGDTSPRHLSNV-p;u	GGKRSRLTPVSPESS-p;u|RSRLTPVSPESSSTE-p;u|SSVDTLLSPTALIDS-p;u|SVPEFPLSPPKKKDL-p;u|EPPSPPQSPRVEEAS-p;u|RVKEEPPSPPQSPRV-p;u|TPGSRSRTPSLPTPP-p;u|QAFELILSPRSKESV-p;u|GAEIVYKSPVVSGDT-p;u|PVVSGDTSPRHLSNV-p;u	QAFELILSPRSKESV-p;u|GGKRSRLTPVSPESS-p;u|RSRLTPVSPESSSTE-p;u|PVVSGDTSPRHLSNV-p;u|GAEIVYKSPVVSGDT-p;u|SSVDTLLSPTALIDS-p;u|TPGSRSRTPSLPTPP-p;u|SVPEFPLSPPKKKDL-p;u|EPPSPPQSPRVEEAS-p;u|RVKEEPPSPPQSPRV-p;u	SSVDTLLSPTALIDS-p;u|EPPSPPQSPRVEEAS-p;u|GGKRSRLTPVSPESS-p;u|RVKEEPPSPPQSPRV-p;u|RSRLTPVSPESSSTE-p;u|QAFELILSPRSKESV-p;u|TPGSRSRTPSLPTPP-p;u|GAEIVYKSPVVSGDT-p;u|SVPEFPLSPPKKKDL-p;u|PVVSGDTSPRHLSNV-p;u	SSVDTLLSPTALIDS-p;u|EPPSPPQSPRVEEAS-p;u|RSRLTPVSPESSSTE-p;u|GGKRSRLTPVSPESS-p;u|RVKEEPPSPPQSPRV-p;u|TPGSRSRTPSLPTPP-p;u|GAEIVYKSPVVSGDT-p;u|SVPEFPLSPPKKKDL-p;u|QAFELILSPRSKESV-p;u|PVVSGDTSPRHLSNV-p;u	TPGSRSRTPSLPTPP-p;u|PVVSGDTSPRHLSNV-p;u|SVPEFPLSPPKKKDL-p;u|QAFELILSPRSKESV-p;u|RVKEEPPSPPQSPRV-p;u|EPPSPPQSPRVEEAS-p;u|RSRLTPVSPESSSTE-p;u|GGKRSRLTPVSPESS-p;u|SSVDTLLSPTALIDS-p;u	RSRLTPVSPESSSTE-p;u|GGKRSRLTPVSPESS-p;u|SSVDTLLSPTALIDS-p;u|EPPSPPQSPRVEEAS-p;u|RVKEEPPSPPQSPRV-p;u|TPGSRSRTPSLPTPP-p;u|GAEIVYKSPVVSGDT-p;u|SVPEFPLSPPKKKDL-p;u|PVVSGDTSPRHLSNV-p;u|QAFELILSPRSKESV-p;u	RVKEEPPSPPQSPRV-p;u|EPPSPPQSPRVEEAS-p;u|SVPEFPLSPPKKKDL-p;u|GGKRSRLTPVSPESS-p;u|QAFELILSPRSKESV-p;u|RSRLTPVSPESSSTE-p;u|SSVDTLLSPTALIDS-p;u|TPGSRSRTPSLPTPP-p;u|GAEIVYKSPVVSGDT-p;u|PVVSGDTSPRHLSNV-p;u	RVKEEPPSPPQSPRV-p;u|GAEIVYKSPVVSGDT-p;u|RSRLTPVSPESSSTE-p;u|EPPSPPQSPRVEEAS-p;u|SSVDTLLSPTALIDS-p;u|GGKRSRLTPVSPESS-p;u|TPGSRSRTPSLPTPP-p;u|SVPEFPLSPPKKKDL-p;u|QAFELILSPRSKESV-p;u|PVVSGDTSPRHLSNV-p;u	RSRLTPVSPESSSTE-p;u|GGKRSRLTPVSPESS-p;u|SSVDTLLSPTALIDS-p;u|EPPSPPQSPRVEEAS-p;u|RVKEEPPSPPQSPRV-p;u|SVPEFPLSPPKKKDL-p;u|QAFELILSPRSKESV-p;u|PVVSGDTSPRHLSNV-p;u	GGKRSRLTPVSPESS-p;u|RVKEEPPSPPQSPRV-p;u|RSRLTPVSPESSSTE-p;u|EPPSPPQSPRVEEAS-p;u|SVPEFPLSPPKKKDL-p;u|QAFELILSPRSKESV-p;u|SSVDTLLSPTALIDS-p;u|TPGSRSRTPSLPTPP-p;u|GAEIVYKSPVVSGDT-p;u|PVVSGDTSPRHLSNV-p;u
KINASE-PSP_PKCE/PRKCE	n=62|OCLN_T404|KCNK3_T383|FGFR1_S779|UGT1A7_S432|MAPT_S352|ADAP1_T276|TICAM2_S16|NANOG_T78|KEAP1_S602|BAD_S75|ADAM17_T735|MAPT_S258|GNAI2_S144|CREB1_S133|NANOG_T200|KIR3DL1_S415|NANOG_S135|RPS6KB2_S473|KRT18_S53|GNAI2_S44|PRKCE_S316|PRKCE_S729|NANOG_S79|GNAI2_S302|BAD_S118|PPP1R14A_T38|GLS_S314|IQGAP1_S1443|ALDH2_T202|PRKD1_S738|SLC6A2_S259|MIIP_S303|KEAP1_S599|RAB11A_S177|RAB5A_T7|NANOG_T280|ITG…	60	20	21.7	21.7	20	21.7	21.7	21.7	18.3	20	20	21.7	21.7	20	21.7	20	20	20	21.7	21.7	21.7	21.7	20	21.7	21.7	21.7	21.7	20	20	18.3	21.7	20	21.7	20	20	21.7	GEKSFRRSVVGTPAY-p;u|ISVSRSTSFRGGMGS-p;u|DHYETDYTTGGESCD-p;u|QGLAERISVL_____-p;u|EIRSRHSSYPAGTED-p;u|NTIDLPMSPRTLDSL-p;u|PQVRVGGSSVDLHRF-p;u|KPFPAPQTPGRLQPA-p;u|HYETDYTTGGESCDE-p;u|YHIHRRKSFDASDTL-p;u|PFRGRSRSAPPNLWA-p;u|GRELRRMSDEFVDSF-p;u	DKMKKSKSVKEDSNL-p;u|GRELRRMSDEFVDSF-p;u|KPFPAPQTPGRLQPA-p;u|PFRGRSRSAPPNLWA-p;u|GEKSFRRSVVGTPAY-p;u|NTIDLPMSPRTLDSL-p;u|QGLAERISVL_____-p;u|HYETDYTTGGESCDE-p;u|ISVSRSTSFRGGMGS-p;u|EIRSRHSSYPAGTED-p;u|DHYETDYTTGGESCD-p;u|PQVRVGGSSVDLHRF-p;u|YHIHRRKSFDASDTL-p;u	GRELRRMSDEFVDSF-p;u|EIRSRHSSYPAGTED-p;u|QGLAERISVL_____-p;u|HYETDYTTGGESCDE-p;u|YHIHRRKSFDASDTL-p;u|PFRGRSRSAPPNLWA-p;u|DHYETDYTTGGESCD-p;u|KPFPAPQTPGRLQPA-p;u|NTIDLPMSPRTLDSL-p;u|DKMKKSKSVKEDSNL-p;u|PQVRVGGSSVDLHRF-p;u|GEKSFRRSVVGTPAY-p;u|ISVSRSTSFRGGMGS-p;u	GRELRRMSDEFVDSF-p;u|PFRGRSRSAPPNLWA-p;u|KPFPAPQTPGRLQPA-p;u|EIRSRHSSYPAGTED-p;u|NTIDLPMSPRTLDSL-p;u|PQVRVGGSSVDLHRF-p;u|ISVSRSTSFRGGMGS-p;u|DHYETDYTTGGESCD-p;u|YHIHRRKSFDASDTL-p;u|HYETDYTTGGESCDE-p;u|QGLAERISVL_____-p;u|GEKSFRRSVVGTPAY-p;u	PQVRVGGSSVDLHRF-p;u|KPFPAPQTPGRLQPA-p;u|HYETDYTTGGESCDE-p;u|DKMKKSKSVKEDSNL-p;u|DHYETDYTTGGESCD-p;u|EIRSRHSSYPAGTED-p;u|NTIDLPMSPRTLDSL-p;u|ISVSRSTSFRGGMGS-p;u|PFRGRSRSAPPNLWA-p;u|GRELRRMSDEFVDSF-p;u|YHIHRRKSFDASDTL-p;u|QGLAERISVL_____-p;u|GEKSFRRSVVGTPAY-p;u	ISVSRSTSFRGGMGS-p;u|HYETDYTTGGESCDE-p;u|DHYETDYTTGGESCD-p;u|PQVRVGGSSVDLHRF-p;u|QGLAERISVL_____-p;u|KPFPAPQTPGRLQPA-p;u|NTIDLPMSPRTLDSL-p;u|GRELRRMSDEFVDSF-p;u|EIRSRHSSYPAGTED-p;u|GEKSFRRSVVGTPAY-p;u|PFRGRSRSAPPNLWA-p;u|YHIHRRKSFDASDTL-p;u|DKMKKSKSVKEDSNL-p;u	GRELRRMSDEFVDSF-p;u|KPFPAPQTPGRLQPA-p;u|PFRGRSRSAPPNLWA-p;u|EIRSRHSSYPAGTED-p;u|QGLAERISVL_____-p;u|ISVSRSTSFRGGMGS-p;u|DKMKKSKSVKEDSNL-p;u|YHIHRRKSFDASDTL-p;u|HYETDYTTGGESCDE-p;u|NTIDLPMSPRTLDSL-p;u|DHYETDYTTGGESCD-p;u|GEKSFRRSVVGTPAY-p;u|PQVRVGGSSVDLHRF-p;u	ISVSRSTSFRGGMGS-p;u|GRELRRMSDEFVDSF-p;u|PFRGRSRSAPPNLWA-p;u|KPFPAPQTPGRLQPA-p;u|PQVRVGGSSVDLHRF-p;u|EIRSRHSSYPAGTED-p;u|QGLAERISVL_____-p;u|NTIDLPMSPRTLDSL-p;u|HYETDYTTGGESCDE-p;u|GEKSFRRSVVGTPAY-p;u|DHYETDYTTGGESCD-p;u	ISVSRSTSFRGGMGS-p;u|EIRSRHSSYPAGTED-p;u|DHYETDYTTGGESCD-p;u|HYETDYTTGGESCDE-p;u|PFRGRSRSAPPNLWA-p;u|YHIHRRKSFDASDTL-p;u|QGLAERISVL_____-p;u|NTIDLPMSPRTLDSL-p;u|GRELRRMSDEFVDSF-p;u|GEKSFRRSVVGTPAY-p;u|KPFPAPQTPGRLQPA-p;u|PQVRVGGSSVDLHRF-p;u	ISVSRSTSFRGGMGS-p;u|DKMKKSKSVKEDSNL-p;u|PQVRVGGSSVDLHRF-p;u|PFRGRSRSAPPNLWA-p;u|KPFPAPQTPGRLQPA-p;u|NTIDLPMSPRTLDSL-p;u|HYETDYTTGGESCDE-p;u|DHYETDYTTGGESCD-p;u|EIRSRHSSYPAGTED-p;u|GRELRRMSDEFVDSF-p;u|GEKSFRRSVVGTPAY-p;u|QGLAERISVL_____-p;u	GRELRRMSDEFVDSF-p;u|ISVSRSTSFRGGMGS-p;u|QGLAERISVL_____-p;u|PFRGRSRSAPPNLWA-p;u|DHYETDYTTGGESCD-p;u|KPFPAPQTPGRLQPA-p;u|HYETDYTTGGESCDE-p;u|EIRSRHSSYPAGTED-p;u|NTIDLPMSPRTLDSL-p;u|DKMKKSKSVKEDSNL-p;u|YHIHRRKSFDASDTL-p;u|GEKSFRRSVVGTPAY-p;u|PQVRVGGSSVDLHRF-p;u	DKMKKSKSVKEDSNL-p;u|QGLAERISVL_____-p;u|PQVRVGGSSVDLHRF-p;u|GEKSFRRSVVGTPAY-p;u|KPFPAPQTPGRLQPA-p;u|ISVSRSTSFRGGMGS-p;u|PFRGRSRSAPPNLWA-p;u|HYETDYTTGGESCDE-p;u|EIRSRHSSYPAGTED-p;u|YHIHRRKSFDASDTL-p;u|NTIDLPMSPRTLDSL-p;u|DHYETDYTTGGESCD-p;u|GRELRRMSDEFVDSF-p;u
KINASE-PSP_DNAPK/PRKDC	n=119|PRKDC_T2609|POU2F1_S92|POU2F1_S147|FUS_T19|FUS_S54|XRCC6_S27|DCLRE1C_S503|IRF3_T135|POU2F1_T226|XRCC4_S327|WRN_S319|XRCC4_S304|FUS_S142|TP53_S37|DCLRE1C_S516|POLL_T204|XPA_S196|FUS_S42|POU2F1_S78|IGFBP3_S183|NHEJ1_T266|WRN_S440|HIST1H1C_T146|HSP90AA1_T7|XRCC5_S580|CDKN1B_S140|H2AFX_T136|XPA_S173|POU2F1_T100|NFKB1_S20|PRKDC_T2647|HNRNPU_S59|DCLRE1C_S548|RPA2_S29|PRKDC_S2612|TP53_S9|POLR2A_S1…	117	9.4	12.8	12	9.4	11.1	12.8	12.8	7.7	11.1	12.8	11.1	11.1	9.4	12.8	11.1	9.4	11.1	12.8	11.1	12.8	12.8	11.1	11.1	12.8	12.8	12.8	12.8	9.4	12	12.8	11.1	12.8	9.4	11.1	11.1	GKKATQASQEY____-p;u|LRETNLDSLPLVDTH-p;u|MFVETQASQGTLQTR-p;u|QEENLEASGDYKYSG-p;u|GETSLMRTLCGTPTY-p;u|LMRTLCGTPTYLAPE-p;u|AMEPGNGSLDLGGDS-p;u|VAGQIRATQQQHDFT-p;u|RPHFPQFSYSASGTA-p;u|KKAAGGATPKKSAKK-p;u|SRSLYASSPGGVYAT-p;u	GKKATQASQEY____-p;u|MFVETQASQGTLQTR-p;u|KKAAGGATPKKSAKK-p;u|VAGQIRATQQQHDFT-p;u|RPHFPQFSYSASGTA-p;u|GQVINETSQHHDDLE-p;u|GETSLMRTLCGTPTY-p;u|LMRTLCGTPTYLAPE-p;u|AMEPGNGSLDLGGDS-p;u|QSPGGFGSPAPSQAE-p;u|SSTVAGGSQSPKLFS-p;u|ASGDYKYSGRDSLIF-p;u|DTSYVIESDEDLEME-p;u|LRETNLDSLPLVDTH-p;u|SRSLYASSPGGVYAT-p;u	QSPGGFGSPAPSQAE-p;u|KKAAGGATPKKSAKK-p;u|VAGQIRATQQQHDFT-p;u|ASGDYKYSGRDSLIF-p;u|AMEPGNGSLDLGGDS-p;u|QEENLEASGDYKYSG-p;u|GQVINETSQHHDDLE-p;u|MFVETQASQGTLQTR-p;u|LMRTLCGTPTYLAPE-p;u|GETSLMRTLCGTPTY-p;u|LRETNLDSLPLVDTH-p;u|GKKATQASQEY____-p;u|RPHFPQFSYSASGTA-p;u|SRSLYASSPGGVYAT-p;u	GKKATQASQEY____-p;u|VAGQIRATQQQHDFT-p;u|MFVETQASQGTLQTR-p;u|SSTVAGGSQSPKLFS-p;u|RPHFPQFSYSASGTA-p;u|AMEPGNGSLDLGGDS-p;u|KKAAGGATPKKSAKK-p;u|QEENLEASGDYKYSG-p;u|GETSLMRTLCGTPTY-p;u|LMRTLCGTPTYLAPE-p;u|SRSLYASSPGGVYAT-p;u	GKKATQASQEY____-p;u|MFVETQASQGTLQTR-p;u|AMEPGNGSLDLGGDS-p;u|SSTVAGGSQSPKLFS-p;u|QSPGGFGSPAPSQAE-p;u|VAGQIRATQQQHDFT-p;u|LMRTLCGTPTYLAPE-p;u|GQVINETSQHHDDLE-p;u|DTSYVIESDEDLEME-p;u|LRETNLDSLPLVDTH-p;u|KKAAGGATPKKSAKK-p;u|GETSLMRTLCGTPTY-p;u|SRSLYASSPGGVYAT-p;u	GKKATQASQEY____-p;u|MFVETQASQGTLQTR-p;u|QSPGGFGSPAPSQAE-p;u|ASGDYKYSGRDSLIF-p;u|VAGQIRATQQQHDFT-p;u|AMEPGNGSLDLGGDS-p;u|LMRTLCGTPTYLAPE-p;u|GQVINETSQHHDDLE-p;u|SSTVAGGSQSPKLFS-p;u|GETSLMRTLCGTPTY-p;u|RPHFPQFSYSASGTA-p;u|LRETNLDSLPLVDTH-p;u|DTSYVIESDEDLEME-p;u|KKAAGGATPKKSAKK-p;u|SRSLYASSPGGVYAT-p;u	SRSLYASSPGGVYAT-p;u|LRETNLDSLPLVDTH-p;u|GQVINETSQHHDDLE-p;u|GKKATQASQEY____-p;u|VAGQIRATQQQHDFT-p;u|ASGDYKYSGRDSLIF-p;u|RPHFPQFSYSASGTA-p;u|MFVETQASQGTLQTR-p;u|KKAAGGATPKKSAKK-p;u|AMEPGNGSLDLGGDS-p;u|GETSLMRTLCGTPTY-p;u|LMRTLCGTPTYLAPE-p;u|QSPGGFGSPAPSQAE-p;u|SSTVAGGSQSPKLFS-p;u|DTSYVIESDEDLEME-p;u	GKKATQASQEY____-p;u|MFVETQASQGTLQTR-p;u|AMEPGNGSLDLGGDS-p;u|GETSLMRTLCGTPTY-p;u|QEENLEASGDYKYSG-p;u|LMRTLCGTPTYLAPE-p;u|RPHFPQFSYSASGTA-p;u|KKAAGGATPKKSAKK-p;u|SRSLYASSPGGVYAT-p;u	QSPGGFGSPAPSQAE-p;u|GKKATQASQEY____-p;u|VAGQIRATQQQHDFT-p;u|MFVETQASQGTLQTR-p;u|GETSLMRTLCGTPTY-p;u|KKAAGGATPKKSAKK-p;u|DTSYVIESDEDLEME-p;u|LMRTLCGTPTYLAPE-p;u|AMEPGNGSLDLGGDS-p;u|GQVINETSQHHDDLE-p;u|SSTVAGGSQSPKLFS-p;u|LRETNLDSLPLVDTH-p;u|SRSLYASSPGGVYAT-p;u	ASGDYKYSGRDSLIF-p;u|MFVETQASQGTLQTR-p;u|GKKATQASQEY____-p;u|GQVINETSQHHDDLE-p;u|AMEPGNGSLDLGGDS-p;u|DTSYVIESDEDLEME-p;u|LMRTLCGTPTYLAPE-p;u|QSPGGFGSPAPSQAE-p;u|RPHFPQFSYSASGTA-p;u|LRETNLDSLPLVDTH-p;u|SSTVAGGSQSPKLFS-p;u|GETSLMRTLCGTPTY-p;u|QEENLEASGDYKYSG-p;u|KKAAGGATPKKSAKK-p;u|SRSLYASSPGGVYAT-p;u	QSPGGFGSPAPSQAE-p;u|DTSYVIESDEDLEME-p;u|GKKATQASQEY____-p;u|AMEPGNGSLDLGGDS-p;u|VAGQIRATQQQHDFT-p;u|SSTVAGGSQSPKLFS-p;u|GETSLMRTLCGTPTY-p;u|MFVETQASQGTLQTR-p;u|GQVINETSQHHDDLE-p;u|LMRTLCGTPTYLAPE-p;u|LRETNLDSLPLVDTH-p;u|KKAAGGATPKKSAKK-p;u|SRSLYASSPGGVYAT-p;u	KKAAGGATPKKSAKK-p;u|GETSLMRTLCGTPTY-p;u|VAGQIRATQQQHDFT-p;u|QSPGGFGSPAPSQAE-p;u|LMRTLCGTPTYLAPE-p;u|SSTVAGGSQSPKLFS-p;u|MFVETQASQGTLQTR-p;u|GKKATQASQEY____-p;u|AMEPGNGSLDLGGDS-p;u|GQVINETSQHHDDLE-p;u|DTSYVIESDEDLEME-p;u|LRETNLDSLPLVDTH-p;u|SRSLYASSPGGVYAT-p;u
KINASE-PSP_ARAF	n=6|BAD_S75|SLC9A3R2_S303|BAD_S118|MAP2K1_S222|MAP2K1_S218|BAD_S99	6	100	83.3	83.3	100	83.3	83.3	83.3	100	100	83.3	100	100	100	83.3	100	100	100	83.3	83.3	83.3	83.3	100	100	83.3	83.3	83.3	83.3	100	83.3	83.3	100	83.3	100	83.3	83.3	EIRSRHSSYPAGTED-p;u|VSGQLIDSMANSFVG-p;u|PFRGRSRSAPPNLWA-p;u|LIDSMANSFVGTRSY-p;u|GRELRRMSDEFVDSF-p;u|QESGLHLSPTAAEAK-p;u	GRELRRMSDEFVDSF-p;u|PFRGRSRSAPPNLWA-p;u|EIRSRHSSYPAGTED-p;u|VSGQLIDSMANSFVG-p;u|LIDSMANSFVGTRSY-p;u	GRELRRMSDEFVDSF-p;u|EIRSRHSSYPAGTED-p;u|VSGQLIDSMANSFVG-p;u|PFRGRSRSAPPNLWA-p;u|LIDSMANSFVGTRSY-p;u	GRELRRMSDEFVDSF-p;u|PFRGRSRSAPPNLWA-p;u|EIRSRHSSYPAGTED-p;u|VSGQLIDSMANSFVG-p;u|LIDSMANSFVGTRSY-p;u|QESGLHLSPTAAEAK-p;u	VSGQLIDSMANSFVG-p;u|LIDSMANSFVGTRSY-p;u|EIRSRHSSYPAGTED-p;u|PFRGRSRSAPPNLWA-p;u|GRELRRMSDEFVDSF-p;u	GRELRRMSDEFVDSF-p;u|VSGQLIDSMANSFVG-p;u|EIRSRHSSYPAGTED-p;u|LIDSMANSFVGTRSY-p;u|PFRGRSRSAPPNLWA-p;u	GRELRRMSDEFVDSF-p;u|PFRGRSRSAPPNLWA-p;u|EIRSRHSSYPAGTED-p;u|VSGQLIDSMANSFVG-p;u|LIDSMANSFVGTRSY-p;u	GRELRRMSDEFVDSF-p;u|PFRGRSRSAPPNLWA-p;u|EIRSRHSSYPAGTED-p;u|VSGQLIDSMANSFVG-p;u|LIDSMANSFVGTRSY-p;u|QESGLHLSPTAAEAK-p;u	EIRSRHSSYPAGTED-p;u|PFRGRSRSAPPNLWA-p;u|QESGLHLSPTAAEAK-p;u|GRELRRMSDEFVDSF-p;u|VSGQLIDSMANSFVG-p;u|LIDSMANSFVGTRSY-p;u	PFRGRSRSAPPNLWA-p;u|VSGQLIDSMANSFVG-p;u|EIRSRHSSYPAGTED-p;u|GRELRRMSDEFVDSF-p;u|LIDSMANSFVGTRSY-p;u	GRELRRMSDEFVDSF-p;u|PFRGRSRSAPPNLWA-p;u|EIRSRHSSYPAGTED-p;u|LIDSMANSFVGTRSY-p;u|VSGQLIDSMANSFVG-p;u|QESGLHLSPTAAEAK-p;u	LIDSMANSFVGTRSY-p;u|QESGLHLSPTAAEAK-p;u|VSGQLIDSMANSFVG-p;u|PFRGRSRSAPPNLWA-p;u|EIRSRHSSYPAGTED-p;u|GRELRRMSDEFVDSF-p;u
KINASE-PSP_EEF2K	n=9|EEF2_T57|EEF2K_S396|EEF2K_S441|EEF2K_S500|EEF2K_T348|EEF2K_S366|EEF2K_T353|EEF2K_S445|EEF2K_S474	9	55.6	55.6	44.4	55.6	55.6	55.6	44.4	55.6	55.6	44.4	55.6	55.6	55.6	44.4	55.6	55.6	55.6	44.4	55.6	55.6	44.4	55.6	55.6	44.4	55.6	44.4	44.4	55.6	44.4	44.4	55.6	44.4	55.6	44.4	55.6	SGDSGYPSEKRGELD-p;u|SPQVRTLSGSRPPLL-p;u|RLHLPRASAVALEVQ-p;u|RAGETRFTDTRKDEQ-p;u|KYESDEDSLGSSGRV-p;u	SGDSGYPSEKRGELD-p;u|RAGETRFTDTRKDEQ-p;u|KYESDEDSLGSSGRV-p;u|RLHLPRASAVALEVQ-p;u|SPQVRTLSGSRPPLL-p;u	RLHLPRASAVALEVQ-p;u|SGDSGYPSEKRGELD-p;u|KYESDEDSLGSSGRV-p;u|RAGETRFTDTRKDEQ-p;u	RLHLPRASAVALEVQ-p;u|RAGETRFTDTRKDEQ-p;u|SGDSGYPSEKRGELD-p;u|KYESDEDSLGSSGRV-p;u|SPQVRTLSGSRPPLL-p;u	SGDSGYPSEKRGELD-p;u|RAGETRFTDTRKDEQ-p;u|KYESDEDSLGSSGRV-p;u|RLHLPRASAVALEVQ-p;u|SPQVRTLSGSRPPLL-p;u	SGDSGYPSEKRGELD-p;u|RAGETRFTDTRKDEQ-p;u|KYESDEDSLGSSGRV-p;u|RLHLPRASAVALEVQ-p;u|SPQVRTLSGSRPPLL-p;u	RLHLPRASAVALEVQ-p;u|SGDSGYPSEKRGELD-p;u|KYESDEDSLGSSGRV-p;u|RAGETRFTDTRKDEQ-p;u	RAGETRFTDTRKDEQ-p;u|SGDSGYPSEKRGELD-p;u|KYESDEDSLGSSGRV-p;u|RLHLPRASAVALEVQ-p;u|SPQVRTLSGSRPPLL-p;u	RAGETRFTDTRKDEQ-p;u|SGDSGYPSEKRGELD-p;u|KYESDEDSLGSSGRV-p;u|RLHLPRASAVALEVQ-p;u|SPQVRTLSGSRPPLL-p;u	RLHLPRASAVALEVQ-p;u|SGDSGYPSEKRGELD-p;u|KYESDEDSLGSSGRV-p;u|RAGETRFTDTRKDEQ-p;u	RAGETRFTDTRKDEQ-p;u|SPQVRTLSGSRPPLL-p;u|RLHLPRASAVALEVQ-p;u|SGDSGYPSEKRGELD-p;u|KYESDEDSLGSSGRV-p;u	SPQVRTLSGSRPPLL-p;u|RLHLPRASAVALEVQ-p;u|RAGETRFTDTRKDEQ-p;u|KYESDEDSLGSSGRV-p;u|SGDSGYPSEKRGELD-p;u
KINASE-PSP_PKCT/PRKCQ	n=30|RDX_T564|BAD_S75|EZR_T567|PRKCQ_T219|IRS1_S1101|PTPN7_S246|CCDC88A_S1690|RASGRP1_T184|CARD11_S559|NR2F6_S83|HIST1H3A_S10|KRAS_S181|FOSL1_S265|MSN_T558|WIPF1_S488|RAPGEF2_S960|CBLB_S282|HABP4_T375|STK39_S323|PTPN7_S44|ICAM3_S518|FOSL1_T230|FOSL1_T223|HABP4_T354|BAD_S99|PPP1R12A_T853|ARHGEF6_S225|ARHGEF6_S488|STK39_S309|RASGRP3_T133	30	16.7	26.7	16.7	20	26.7	26.7	23.3	16.7	26.7	23.3	23.3	26.7	20	23.3	23.3	20	26.7	23.3	26.7	20	23.3	23.3	26.7	23.3	26.7	23.3	23.3	16.7	23.3	23.3	23.3	23.3	16.7	26.7	26.7	EIRSRHSSYPAGTED-p;u|PFRGRSRSAPPNLWA-p;u|LSASPRMSGFIYQGK-p;u|PSSDPLGSPTLLAL_-p;u|RLQERRGSNVALMLD-p;u	PFRGRSRSAPPNLWA-p;u|PREKRRSTGVSFWTQ-p;u|EIRSRHSSYPAGTED-p;u|LSASPRMSGFIYQGK-p;u|KKRVRRSSFLNAKKL-p;u|PSSDPLGSPTLLAL_-p;u|KSSERPLSPKAVKGF-p;u|RLQERRGSNVALMLD-p;u	EIRSRHSSYPAGTED-p;u|PFRGRSRSAPPNLWA-p;u|PSSDPLGSPTLLAL_-p;u|LSASPRMSGFIYQGK-p;u|RLQERRGSNVALMLD-p;u	PFRGRSRSAPPNLWA-p;u|EIRSRHSSYPAGTED-p;u|PREKRRSTGVSFWTQ-p;u|LSASPRMSGFIYQGK-p;u|PSSDPLGSPTLLAL_-p;u|RLQERRGSNVALMLD-p;u	KKRVRRSSFLNAKKL-p;u|PREKRRSTGVSFWTQ-p;u|PSSDPLGSPTLLAL_-p;u|EIRSRHSSYPAGTED-p;u|PFRGRSRSAPPNLWA-p;u|LSASPRMSGFIYQGK-p;u|KSSERPLSPKAVKGF-p;u|RLQERRGSNVALMLD-p;u	LSASPRMSGFIYQGK-p;u|EIRSRHSSYPAGTED-p;u|PFRGRSRSAPPNLWA-p;u|PREKRRSTGVSFWTQ-p;u|KKRVRRSSFLNAKKL-p;u|PSSDPLGSPTLLAL_-p;u|RLQERRGSNVALMLD-p;u|KSSERPLSPKAVKGF-p;u	KSSERPLSPKAVKGF-p;u|PFRGRSRSAPPNLWA-p;u|EIRSRHSSYPAGTED-p;u|KKRVRRSSFLNAKKL-p;u|LSASPRMSGFIYQGK-p;u|PSSDPLGSPTLLAL_-p;u|RLQERRGSNVALMLD-p;u	PFRGRSRSAPPNLWA-p;u|EIRSRHSSYPAGTED-p;u|LSASPRMSGFIYQGK-p;u|PSSDPLGSPTLLAL_-p;u|RLQERRGSNVALMLD-p;u	EIRSRHSSYPAGTED-p;u|LSASPRMSGFIYQGK-p;u|KKRVRRSSFLNAKKL-p;u|PSSDPLGSPTLLAL_-p;u|PFRGRSRSAPPNLWA-p;u|PREKRRSTGVSFWTQ-p;u|RLQERRGSNVALMLD-p;u|KSSERPLSPKAVKGF-p;u	PFRGRSRSAPPNLWA-p;u|LSASPRMSGFIYQGK-p;u|EIRSRHSSYPAGTED-p;u|KKRVRRSSFLNAKKL-p;u|PSSDPLGSPTLLAL_-p;u|KSSERPLSPKAVKGF-p;u|RLQERRGSNVALMLD-p;u	PFRGRSRSAPPNLWA-p;u|EIRSRHSSYPAGTED-p;u|PSSDPLGSPTLLAL_-p;u|KKRVRRSSFLNAKKL-p;u|LSASPRMSGFIYQGK-p;u|KSSERPLSPKAVKGF-p;u|RLQERRGSNVALMLD-p;u	PFRGRSRSAPPNLWA-p;u|PREKRRSTGVSFWTQ-p;u|EIRSRHSSYPAGTED-p;u|LSASPRMSGFIYQGK-p;u|PSSDPLGSPTLLAL_-p;u|KKRVRRSSFLNAKKL-p;u|RLQERRGSNVALMLD-p;u|KSSERPLSPKAVKGF-p;u
KINASE-PSP_p70S6K/RPS6KB1	n=46|BACH2_S521|IRS1_S636|TARBP2_S283|MTOR_T2446|FMR1_S500|NDRG2_S350|IRS1_S1101|RPS6_S244|GSK3B_S9|PDCD4_S67|NDRG2_S332|TP63_S560|MTOR_S2448|MAPT_S214|TRIB2_S83|DEPTOR_S287|RPS6_S240|RPS6KB1_T412|EEF2K_S366|ESR1_S167|LTC4S_S36|MXD1_S145|RPS6_S236|IRS1_S307|URI1_S372|MRE11_T597|MAPT_S262|CAD_S1859|NCBP1_S22|DEPTOR_S286|CCT2_S260|IRS1_S527|NCBP1_S7|IRS1_S270|MAPT_T212|PIP5K1C_S555|GLI1_S84|RICTOR_…	46	50	45.7	50	47.8	45.7	45.7	45.7	47.8	45.7	47.8	45.7	45.7	47.8	45.7	47.8	47.8	45.7	50	45.7	50	45.7	47.8	45.7	45.7	45.7	45.7	47.8	50	45.7	45.7	47.8	45.7	50	41.3	45.7	GSRVRVDSTAKVAEI-p;u|SGDYMPMSPKSVSAP-p;u|SGRPRTTSFAESCKP-p;u|KRRLRKNSSRDSGRG-p;u|SPQVRTLSGSRPPLL-p;u|AKRKRKNSTGSGHSA-p;u|PHKRRKTSDANETED-p;u|RLSSLRASTSKSESS-p;u|IAKRRRLSSLRASTS-p;u|AKRRRLSSLRASTSK-p;u|QPHKRRKTSDANETE-p;u|LRASTSKSESSQK__-p;u|RERSRTGSESSQTGT-p;u|TRRSRTESITATSPA-p;u|PRRVNSASSSNPPAE-p;u|ELPRRVNSASSSNPP-p;u|LSRSRTASLTSAASV-p;u|EFRPRSKSQSSSNCS-p;u|PPRIHRASDPGLPAE-p;u|RSRTRTDSYSAGQSV-p;u…	LSRSRTASLTSAASV-p;u|TRRSRTESITATSPA-p;u|SGDYMPMSPKSVSAP-p;u|EFRPRSKSQSSSNCS-p;u|SGRPRTTSFAESCKP-p;u|GSRVRVDSTAKVAEI-p;u|ELPRRVNSASSSNPP-p;u|RSRTRTDSYSAGQSV-p;u|CGSSGYFSSSPTLSS-p;u|PHKRRKTSDANETED-p;u|PPRIHRASDPGLPAE-p;u|PRRVNSASSSNPPAE-p;u|TPGSRSRTPSLPTPP-p;u|IAKRRRLSSLRASTS-p;u|AKRRRLSSLRASTSK-p;u|SPQVRTLSGSRPPLL-p;u|RLSSLRASTSKSESS-p;u|QPHKRRKTSDANETE-p;u|RERSRTGSESSQTGT-p;u|LRASTSKSESSQK__-p;u…	AKRKRKNSTGSGHSA-p;u|LSRSRTASLTSAASV-p;u|CGSSGYFSSSPTLSS-p;u|RERSRTGSESSQTGT-p;u|PRRVNSASSSNPPAE-p;u|KRRLRKNSSRDSGRG-p;u|TRRSRTESITATSPA-p;u|PHKRRKTSDANETED-p;u|GSRVRVDSTAKVAEI-p;u|RSRTRTDSYSAGQSV-p;u|SGRPRTTSFAESCKP-p;u|PPRIHRASDPGLPAE-p;u|QPHKRRKTSDANETE-p;u|TPGSRSRTPSLPTPP-p;u|ELPRRVNSASSSNPP-p;u|EFRPRSKSQSSSNCS-p;u|SGDYMPMSPKSVSAP-p;u|_MSRRRHSDENDGGQ-p;u|IAKRRRLSSLRASTS-p;u|RLSSLRASTSKSESS-p;u…	AKRKRKNSTGSGHSA-p;u|GSRVRVDSTAKVAEI-p;u|SGRPRTTSFAESCKP-p;u|LSRSRTASLTSAASV-p;u|RERSRTGSESSQTGT-p;u|TPGSRSRTPSLPTPP-p;u|IAKRRRLSSLRASTS-p;u|PHKRRKTSDANETED-p;u|QPHKRRKTSDANETE-p;u|PRRVNSASSSNPPAE-p;u|PPRIHRASDPGLPAE-p;u|NVKSKIGSTENLKHQ-p;u|ELPRRVNSASSSNPP-p;u|TRRSRTESITATSPA-p;u|AKRRRLSSLRASTSK-p;u|RLSSLRASTSKSESS-p;u|EFRPRSKSQSSSNCS-p;u|RSRTRTDSYSAGQSV-p;u|SPQVRTLSGSRPPLL-p;u|SGDYMPMSPKSVSAP-p;u…	PHKRRKTSDANETED-p;u|QPHKRRKTSDANETE-p;u|GSRVRVDSTAKVAEI-p;u|SGRPRTTSFAESCKP-p;u|RSRTRTDSYSAGQSV-p;u|NSEASNASETESDHR-p;u|RERSRTGSESSQTGT-p;u|LSRSRTASLTSAASV-p;u|ELPRRVNSASSSNPP-p;u|PRRVNSASSSNPPAE-p;u|TRRSRTESITATSPA-p;u|SPQVRTLSGSRPPLL-p;u|PPRIHRASDPGLPAE-p;u|EFRPRSKSQSSSNCS-p;u|SGDYMPMSPKSVSAP-p;u|TPGSRSRTPSLPTPP-p;u|RLSSLRASTSKSESS-p;u|LRASTSKSESSQK__-p;u|AKRRRLSSLRASTSK-p;u|IAKRRRLSSLRASTS-p;u…	RERSRTGSESSQTGT-p;u|SGRPRTTSFAESCKP-p;u|PHKRRKTSDANETED-p;u|LSRSRTASLTSAASV-p;u|QPHKRRKTSDANETE-p;u|ELPRRVNSASSSNPP-p;u|TRRSRTESITATSPA-p;u|GSRVRVDSTAKVAEI-p;u|RSRTRTDSYSAGQSV-p;u|CGSSGYFSSSPTLSS-p;u|PRRVNSASSSNPPAE-p;u|EFRPRSKSQSSSNCS-p;u|SGDYMPMSPKSVSAP-p;u|TPGSRSRTPSLPTPP-p;u|PPRIHRASDPGLPAE-p;u|NVKSKIGSTENLKHQ-p;u|RLSSLRASTSKSESS-p;u|IAKRRRLSSLRASTS-p;u|SPQVRTLSGSRPPLL-p;u|AKRRRLSSLRASTSK-p;u…	TPGSRSRTPSLPTPP-p;u|CGSSGYFSSSPTLSS-p;u|GSRVRVDSTAKVAEI-p;u|NVKSKIGSTENLKHQ-p;u|PHKRRKTSDANETED-p;u|LSRSRTASLTSAASV-p;u|QPHKRRKTSDANETE-p;u|RERSRTGSESSQTGT-p;u|SGDYMPMSPKSVSAP-p;u|KRRLRKNSSRDSGRG-p;u|PPRIHRASDPGLPAE-p;u|IAKRRRLSSLRASTS-p;u|TRRSRTESITATSPA-p;u|LRASTSKSESSQK__-p;u|AKRRRLSSLRASTSK-p;u|EFRPRSKSQSSSNCS-p;u|ELPRRVNSASSSNPP-p;u|RLSSLRASTSKSESS-p;u|SGRPRTTSFAESCKP-p;u|PRRVNSASSSNPPAE-p;u…	AKRKRKNSTGSGHSA-p;u|GSRVRVDSTAKVAEI-p;u|ELPRRVNSASSSNPP-p;u|QPHKRRKTSDANETE-p;u|PHKRRKTSDANETED-p;u|PRRVNSASSSNPPAE-p;u|LSRSRTASLTSAASV-p;u|SGRPRTTSFAESCKP-p;u|SPQVRTLSGSRPPLL-p;u|RERSRTGSESSQTGT-p;u|_MSRRRHSDENDGGQ-p;u|SGDYMPMSPKSVSAP-p;u|RSRTRTDSYSAGQSV-p;u|TPGSRSRTPSLPTPP-p;u|IAKRRRLSSLRASTS-p;u|PPRIHRASDPGLPAE-p;u|TRRSRTESITATSPA-p;u|EFRPRSKSQSSSNCS-p;u|RLSSLRASTSKSESS-p;u|LRASTSKSESSQK__-p;u…	SGDYMPMSPKSVSAP-p;u|TRRSRTESITATSPA-p;u|LSRSRTASLTSAASV-p;u|NSEASNASETESDHR-p;u|AKRKRKNSTGSGHSA-p;u|EFRPRSKSQSSSNCS-p;u|PPRIHRASDPGLPAE-p;u|PRRVNSASSSNPPAE-p;u|PHKRRKTSDANETED-p;u|QPHKRRKTSDANETE-p;u|GSRVRVDSTAKVAEI-p;u|RERSRTGSESSQTGT-p;u|SPQVRTLSGSRPPLL-p;u|RLSSLRASTSKSESS-p;u|RSRTRTDSYSAGQSV-p;u|LRASTSKSESSQK__-p;u|SGRPRTTSFAESCKP-p;u|IAKRRRLSSLRASTS-p;u|TPGSRSRTPSLPTPP-p;u|AKRRRLSSLRASTSK-p;u…	CGSSGYFSSSPTLSS-p;u|LSRSRTASLTSAASV-p;u|ELPRRVNSASSSNPP-p;u|QPHKRRKTSDANETE-p;u|_MSRRRHSDENDGGQ-p;u|PHKRRKTSDANETED-p;u|RERSRTGSESSQTGT-p;u|SGRPRTTSFAESCKP-p;u|GSRVRVDSTAKVAEI-p;u|PRRVNSASSSNPPAE-p;u|TRRSRTESITATSPA-p;u|IAKRRRLSSLRASTS-p;u|RSRTRTDSYSAGQSV-p;u|LRASTSKSESSQK__-p;u|TPGSRSRTPSLPTPP-p;u|PPRIHRASDPGLPAE-p;u|SGDYMPMSPKSVSAP-p;u|AKRKRKNSTGSGHSA-p;u|RLSSLRASTSKSESS-p;u|AKRRRLSSLRASTSK-p;u…	RERSRTGSESSQTGT-p;u|PPRIHRASDPGLPAE-p;u|GSRVRVDSTAKVAEI-p;u|KRRLRKNSSRDSGRG-p;u|RSRTRTDSYSAGQSV-p;u|ELPRRVNSASSSNPP-p;u|PRRVNSASSSNPPAE-p;u|SGDYMPMSPKSVSAP-p;u|SGRPRTTSFAESCKP-p;u|SPQVRTLSGSRPPLL-p;u|PHKRRKTSDANETED-p;u|QPHKRRKTSDANETE-p;u|EFRPRSKSQSSSNCS-p;u|LSRSRTASLTSAASV-p;u|AKRKRKNSTGSGHSA-p;u|TRRSRTESITATSPA-p;u|IAKRRRLSSLRASTS-p;u|RLSSLRASTSKSESS-p;u|AKRRRLSSLRASTSK-p;u|LRASTSKSESSQK__-p;u…	SGRPRTTSFAESCKP-p;u|PHKRRKTSDANETED-p;u|QPHKRRKTSDANETE-p;u|GSRVRVDSTAKVAEI-p;u|SGDYMPMSPKSVSAP-p;u|SPQVRTLSGSRPPLL-p;u|EFRPRSKSQSSSNCS-p;u|LSRSRTASLTSAASV-p;u|AKRKRKNSTGSGHSA-p;u|TRRSRTESITATSPA-p;u|RSRTRTDSYSAGQSV-p;u|PRRVNSASSSNPPAE-p;u|ELPRRVNSASSSNPP-p;u|PPRIHRASDPGLPAE-p;u|RERSRTGSESSQTGT-p;u|TPGSRSRTPSLPTPP-p;u|IAKRRRLSSLRASTS-p;u|NVKSKIGSTENLKHQ-p;u|RLSSLRASTSKSESS-p;u|AKRRRLSSLRASTSK-p;u…
KINASE-PSP_CDK9	n=41|SUPT5H_T814|SMAD1_S195|SMAD1_S187|CDK9_T186|RCHY1_T217|SMAD3_S208|RCHY1_S211|SUPT5H_T784|HIST1H1A_S183|SUPT5H_T806|POLR2A_S1616|BORA_S325|XRN2_T439|CDK9_T362|SUPT5H_T775|PPARG_S112|SUPT5H_T799|CDK9_S353|SUPT5H_T768|POLR2A_S1621|SUPT5H_T791|SMAD1_S206|POLR2A_T1618|NCOA2_S493|RB1_S795|TP53_S392|TP53_S33|POLR2A_S1619|SUPT5H_S666|CDK9_T363|RB1_S807|CDK9_S347|NCOA2_S499|NCOA2_S487|SMAD1_S214|SMAD…	41	34.1	41.5	39	36.6	34.1	41.5	36.6	34.1	34.1	39	34.1	36.6	36.6	39	34.1	36.6	34.1	41.5	34.1	41.5	36.6	34.1	36.6	39	41.5	36.6	39	34.1	34.1	36.6	34.1	39	34.1	31.7	34.1	MSPGVAGSPRIPPSQ-p;u|LSPRHRMSPGVAGSP-p;u|SPYIDGCSPIKNWSP-p;u|TPHYGSQTPLHDGSR-p;u|VGGFAPMSPRISSPM-p;u|NSQPNRYTNRVVTLW-p;u|AIKVEPASPPYYSEK-p;u|PLHDGSRTPAQSGAW-p;u|APPRRKGSQITQQST-p;u|IYISPLKSPYKISEG-p;u|TPMYGSQTPLQDGSR-p;u|PGGNIYISPLKSPYK-p;u|SPYKFPSSPLRIPGG-p;u|LPNNTSSSPQPKKKP-p;u	GQPTSMLSPRHRMSP-p;u|GSQITQQSTNQSRNP-p;u|TPMYGSQTPLQDGSR-p;u|VGGFAPMSPRISSPM-p;u|SPYIDGCSPIKNWSP-p;u|LPNNTSSSPQPKKKP-p;u|PLHDGSRTPAQSGAW-p;u|PGGNIYISPLKSPYK-p;u|MYGSGSRTPMYGSQT-p;u|TPHYGSQTPLHDGSR-p;u|MSPGVAGSPRIPPSQ-p;u|SPYKFPSSPLRIPGG-p;u|APPRRKGSQITQQST-p;u|AIKVEPASPPYYSEK-p;u|LSPRHRMSPGVAGSP-p;u|IYISPLKSPYKISEG-p;u|NSQPNRYTNRVVTLW-p;u	TPHYGSQTPLHDGSR-p;u|SPYIDGCSPIKNWSP-p;u|MSPGVAGSPRIPPSQ-p;u|LSPRHRMSPGVAGSP-p;u|APPRRKGSQITQQST-p;u|NSQPNRYTNRVVTLW-p;u|VGGFAPMSPRISSPM-p;u|AIKVEPASPPYYSEK-p;u|GSQITQQSTNQSRNP-p;u|TPMYGSQTPLQDGSR-p;u|PLHDGSRTPAQSGAW-p;u|GQPTSMLSPRHRMSP-p;u|PGGNIYISPLKSPYK-p;u|IYISPLKSPYKISEG-p;u|SPYKFPSSPLRIPGG-p;u|LPNNTSSSPQPKKKP-p;u	MSPGVAGSPRIPPSQ-p;u|LSPRHRMSPGVAGSP-p;u|TPHYGSQTPLHDGSR-p;u|TPMYGSQTPLQDGSR-p;u|SPYIDGCSPIKNWSP-p;u|APPRRKGSQITQQST-p;u|NSQPNRYTNRVVTLW-p;u|MYGSGSRTPMYGSQT-p;u|VGGFAPMSPRISSPM-p;u|AIKVEPASPPYYSEK-p;u|PLHDGSRTPAQSGAW-p;u|IYISPLKSPYKISEG-p;u|PGGNIYISPLKSPYK-p;u|SPYKFPSSPLRIPGG-p;u|LPNNTSSSPQPKKKP-p;u	AIKVEPASPPYYSEK-p;u|MYGSGSRTPMYGSQT-p;u|LSPRHRMSPGVAGSP-p;u|MSPGVAGSPRIPPSQ-p;u|APPRRKGSQITQQST-p;u|SPYIDGCSPIKNWSP-p;u|VGGFAPMSPRISSPM-p;u|PLHDGSRTPAQSGAW-p;u|IYISPLKSPYKISEG-p;u|PGGNIYISPLKSPYK-p;u|TPHYGSQTPLHDGSR-p;u|LPNNTSSSPQPKKKP-p;u|NSQPNRYTNRVVTLW-p;u|SPYKFPSSPLRIPGG-p;u	AIKVEPASPPYYSEK-p;u|LPNNTSSSPQPKKKP-p;u|IYISPLKSPYKISEG-p;u|MSPGVAGSPRIPPSQ-p;u|SPYIDGCSPIKNWSP-p;u|LSPRHRMSPGVAGSP-p;u|GSQITQQSTNQSRNP-p;u|PGGNIYISPLKSPYK-p;u|TPMYGSQTPLQDGSR-p;u|VGGFAPMSPRISSPM-p;u|PLHDGSRTPAQSGAW-p;u|GQPTSMLSPRHRMSP-p;u|SPYKFPSSPLRIPGG-p;u|MYGSGSRTPMYGSQT-p;u|APPRRKGSQITQQST-p;u|NSQPNRYTNRVVTLW-p;u|TPHYGSQTPLHDGSR-p;u	TPMYGSQTPLQDGSR-p;u|LSPRHRMSPGVAGSP-p;u|APPRRKGSQITQQST-p;u|GSQITQQSTNQSRNP-p;u|GQPTSMLSPRHRMSP-p;u|TPHYGSQTPLHDGSR-p;u|VGGFAPMSPRISSPM-p;u|SPYIDGCSPIKNWSP-p;u|PGGNIYISPLKSPYK-p;u|MSPGVAGSPRIPPSQ-p;u|NSQPNRYTNRVVTLW-p;u|IYISPLKSPYKISEG-p;u|SPYKFPSSPLRIPGG-p;u|AIKVEPASPPYYSEK-p;u|LPNNTSSSPQPKKKP-p;u	MSPGVAGSPRIPPSQ-p;u|LSPRHRMSPGVAGSP-p;u|AIKVEPASPPYYSEK-p;u|APPRRKGSQITQQST-p;u|SPYIDGCSPIKNWSP-p;u|PGGNIYISPLKSPYK-p;u|NSQPNRYTNRVVTLW-p;u|SPYKFPSSPLRIPGG-p;u|TPHYGSQTPLHDGSR-p;u|PLHDGSRTPAQSGAW-p;u|IYISPLKSPYKISEG-p;u|VGGFAPMSPRISSPM-p;u|TPMYGSQTPLQDGSR-p;u|LPNNTSSSPQPKKKP-p;u	APPRRKGSQITQQST-p;u|PLHDGSRTPAQSGAW-p;u|VGGFAPMSPRISSPM-p;u|MYGSGSRTPMYGSQT-p;u|NSQPNRYTNRVVTLW-p;u|TPMYGSQTPLQDGSR-p;u|SPYIDGCSPIKNWSP-p;u|LSPRHRMSPGVAGSP-p;u|AIKVEPASPPYYSEK-p;u|IYISPLKSPYKISEG-p;u|MSPGVAGSPRIPPSQ-p;u|PGGNIYISPLKSPYK-p;u|LPNNTSSSPQPKKKP-p;u|SPYKFPSSPLRIPGG-p;u	PGGNIYISPLKSPYK-p;u|SPYKFPSSPLRIPGG-p;u|IYISPLKSPYKISEG-p;u|TPMYGSQTPLQDGSR-p;u|SPYIDGCSPIKNWSP-p;u|GSQITQQSTNQSRNP-p;u|APPRRKGSQITQQST-p;u|AIKVEPASPPYYSEK-p;u|VGGFAPMSPRISSPM-p;u|NSQPNRYTNRVVTLW-p;u|GQPTSMLSPRHRMSP-p;u|TPHYGSQTPLHDGSR-p;u|LPNNTSSSPQPKKKP-p;u|LSPRHRMSPGVAGSP-p;u|PLHDGSRTPAQSGAW-p;u|MSPGVAGSPRIPPSQ-p;u	APPRRKGSQITQQST-p;u|TPMYGSQTPLQDGSR-p;u|PLHDGSRTPAQSGAW-p;u|NSQPNRYTNRVVTLW-p;u|VGGFAPMSPRISSPM-p;u|TPHYGSQTPLHDGSR-p;u|AIKVEPASPPYYSEK-p;u|IYISPLKSPYKISEG-p;u|LSPRHRMSPGVAGSP-p;u|SPYIDGCSPIKNWSP-p;u|PGGNIYISPLKSPYK-p;u|SPYKFPSSPLRIPGG-p;u|MSPGVAGSPRIPPSQ-p;u|LPNNTSSSPQPKKKP-p;u	LPNNTSSSPQPKKKP-p;u|AIKVEPASPPYYSEK-p;u|MYGSGSRTPMYGSQT-p;u|LSPRHRMSPGVAGSP-p;u|APPRRKGSQITQQST-p;u|PLHDGSRTPAQSGAW-p;u|VGGFAPMSPRISSPM-p;u|TPMYGSQTPLQDGSR-p;u|TPHYGSQTPLHDGSR-p;u|MSPGVAGSPRIPPSQ-p;u|IYISPLKSPYKISEG-p;u|PGGNIYISPLKSPYK-p;u|SPYKFPSSPLRIPGG-p;u|SPYIDGCSPIKNWSP-p;u|NSQPNRYTNRVVTLW-p;u
KINASE-PSP_RAF1	n=12|RAF1_S621|KLF10_T93|BAD_S75|BAD_S118|MAP2K1_S222|EEF1A2_S21|MAP2K1_S218|RAF1_S259|MYC_T8|RAF1_S338|BAD_S99|PPP1R12A_T696	12	58.3	58.3	58.3	58.3	58.3	58.3	58.3	58.3	58.3	58.3	58.3	58.3	58.3	58.3	58.3	58.3	58.3	58.3	58.3	58.3	58.3	58.3	58.3	58.3	58.3	58.3	58.3	58.3	58.3	58.3	58.3	58.3	58.3	58.3	58.3	EIRSRHSSYPAGTED-p;u|VSGQLIDSMANSFVG-p;u|PFRGRSRSAPPNLWA-p;u|LIDSMANSFVGTRSY-p;u|PKINRSASEPSLHRA-p;u|SQRQRSTSTPNVHMV-p;u|GRELRRMSDEFVDSF-p;u	GRELRRMSDEFVDSF-p;u|PFRGRSRSAPPNLWA-p;u|EIRSRHSSYPAGTED-p;u|VSGQLIDSMANSFVG-p;u|LIDSMANSFVGTRSY-p;u|SQRQRSTSTPNVHMV-p;u|PKINRSASEPSLHRA-p;u	PKINRSASEPSLHRA-p;u|SQRQRSTSTPNVHMV-p;u|GRELRRMSDEFVDSF-p;u|EIRSRHSSYPAGTED-p;u|VSGQLIDSMANSFVG-p;u|PFRGRSRSAPPNLWA-p;u|LIDSMANSFVGTRSY-p;u	GRELRRMSDEFVDSF-p;u|PFRGRSRSAPPNLWA-p;u|EIRSRHSSYPAGTED-p;u|PKINRSASEPSLHRA-p;u|VSGQLIDSMANSFVG-p;u|LIDSMANSFVGTRSY-p;u|SQRQRSTSTPNVHMV-p;u	VSGQLIDSMANSFVG-p;u|PKINRSASEPSLHRA-p;u|LIDSMANSFVGTRSY-p;u|EIRSRHSSYPAGTED-p;u|SQRQRSTSTPNVHMV-p;u|PFRGRSRSAPPNLWA-p;u|GRELRRMSDEFVDSF-p;u	GRELRRMSDEFVDSF-p;u|VSGQLIDSMANSFVG-p;u|EIRSRHSSYPAGTED-p;u|LIDSMANSFVGTRSY-p;u|PFRGRSRSAPPNLWA-p;u|SQRQRSTSTPNVHMV-p;u|PKINRSASEPSLHRA-p;u	GRELRRMSDEFVDSF-p;u|PFRGRSRSAPPNLWA-p;u|PKINRSASEPSLHRA-p;u|EIRSRHSSYPAGTED-p;u|SQRQRSTSTPNVHMV-p;u|VSGQLIDSMANSFVG-p;u|LIDSMANSFVGTRSY-p;u	GRELRRMSDEFVDSF-p;u|PFRGRSRSAPPNLWA-p;u|EIRSRHSSYPAGTED-p;u|PKINRSASEPSLHRA-p;u|SQRQRSTSTPNVHMV-p;u|VSGQLIDSMANSFVG-p;u|LIDSMANSFVGTRSY-p;u	EIRSRHSSYPAGTED-p;u|PFRGRSRSAPPNLWA-p;u|SQRQRSTSTPNVHMV-p;u|GRELRRMSDEFVDSF-p;u|VSGQLIDSMANSFVG-p;u|PKINRSASEPSLHRA-p;u|LIDSMANSFVGTRSY-p;u	PFRGRSRSAPPNLWA-p;u|PKINRSASEPSLHRA-p;u|VSGQLIDSMANSFVG-p;u|EIRSRHSSYPAGTED-p;u|GRELRRMSDEFVDSF-p;u|LIDSMANSFVGTRSY-p;u|SQRQRSTSTPNVHMV-p;u	GRELRRMSDEFVDSF-p;u|PFRGRSRSAPPNLWA-p;u|PKINRSASEPSLHRA-p;u|EIRSRHSSYPAGTED-p;u|SQRQRSTSTPNVHMV-p;u|LIDSMANSFVGTRSY-p;u|VSGQLIDSMANSFVG-p;u	LIDSMANSFVGTRSY-p;u|VSGQLIDSMANSFVG-p;u|PFRGRSRSAPPNLWA-p;u|PKINRSASEPSLHRA-p;u|EIRSRHSSYPAGTED-p;u|SQRQRSTSTPNVHMV-p;u|GRELRRMSDEFVDSF-p;u
KINASE-PSP_BRAF	n=16|SLC9A1_T653|BAD_S75|EEF1A1_T88|EEF1A1_S21|BRAF_S614|BAD_S118|MAP2K1_S222|EEF1A2_S21|MAP2K1_S218|TTK_S281|BRAF_T373|MAP2K2_S226|TTK_S436|BAD_S99|MAP2K2_S222|BAD_S134	13	61.5	61.5	61.5	61.5	61.5	61.5	61.5	61.5	61.5	61.5	61.5	61.5	61.5	61.5	61.5	61.5	61.5	61.5	61.5	61.5	61.5	61.5	61.5	61.5	61.5	61.5	61.5	61.5	61.5	61.5	61.5	61.5	61.5	61.5	61.5	VPVNLLNSPDCDVKT-p;u|EIRSRHSSYPAGTED-p;u|VSGQLIDSMANSFVG-p;u|PFRGRSRSAPPNLWA-p;u|KGLPRPKSAGTATQM-p;u|LIDSMANSFVGTRSY-p;u|VFSVSKQSPPISTSK-p;u|GRELRRMSDEFVDSF-p;u	GRELRRMSDEFVDSF-p;u|KGLPRPKSAGTATQM-p;u|PFRGRSRSAPPNLWA-p;u|VPVNLLNSPDCDVKT-p;u|VFSVSKQSPPISTSK-p;u|EIRSRHSSYPAGTED-p;u|VSGQLIDSMANSFVG-p;u|LIDSMANSFVGTRSY-p;u	KGLPRPKSAGTATQM-p;u|GRELRRMSDEFVDSF-p;u|EIRSRHSSYPAGTED-p;u|VSGQLIDSMANSFVG-p;u|PFRGRSRSAPPNLWA-p;u|VPVNLLNSPDCDVKT-p;u|LIDSMANSFVGTRSY-p;u|VFSVSKQSPPISTSK-p;u	KGLPRPKSAGTATQM-p;u|GRELRRMSDEFVDSF-p;u|PFRGRSRSAPPNLWA-p;u|VPVNLLNSPDCDVKT-p;u|EIRSRHSSYPAGTED-p;u|VSGQLIDSMANSFVG-p;u|LIDSMANSFVGTRSY-p;u|VFSVSKQSPPISTSK-p;u	VSGQLIDSMANSFVG-p;u|VPVNLLNSPDCDVKT-p;u|LIDSMANSFVGTRSY-p;u|EIRSRHSSYPAGTED-p;u|VFSVSKQSPPISTSK-p;u|PFRGRSRSAPPNLWA-p;u|GRELRRMSDEFVDSF-p;u|KGLPRPKSAGTATQM-p;u	GRELRRMSDEFVDSF-p;u|VPVNLLNSPDCDVKT-p;u|VSGQLIDSMANSFVG-p;u|EIRSRHSSYPAGTED-p;u|LIDSMANSFVGTRSY-p;u|PFRGRSRSAPPNLWA-p;u|VFSVSKQSPPISTSK-p;u|KGLPRPKSAGTATQM-p;u	KGLPRPKSAGTATQM-p;u|GRELRRMSDEFVDSF-p;u|PFRGRSRSAPPNLWA-p;u|EIRSRHSSYPAGTED-p;u|VSGQLIDSMANSFVG-p;u|VFSVSKQSPPISTSK-p;u|VPVNLLNSPDCDVKT-p;u|LIDSMANSFVGTRSY-p;u	KGLPRPKSAGTATQM-p;u|GRELRRMSDEFVDSF-p;u|PFRGRSRSAPPNLWA-p;u|EIRSRHSSYPAGTED-p;u|VPVNLLNSPDCDVKT-p;u|VSGQLIDSMANSFVG-p;u|LIDSMANSFVGTRSY-p;u|VFSVSKQSPPISTSK-p;u	EIRSRHSSYPAGTED-p;u|KGLPRPKSAGTATQM-p;u|PFRGRSRSAPPNLWA-p;u|GRELRRMSDEFVDSF-p;u|VSGQLIDSMANSFVG-p;u|VPVNLLNSPDCDVKT-p;u|VFSVSKQSPPISTSK-p;u|LIDSMANSFVGTRSY-p;u	KGLPRPKSAGTATQM-p;u|PFRGRSRSAPPNLWA-p;u|VSGQLIDSMANSFVG-p;u|EIRSRHSSYPAGTED-p;u|GRELRRMSDEFVDSF-p;u|LIDSMANSFVGTRSY-p;u|VPVNLLNSPDCDVKT-p;u|VFSVSKQSPPISTSK-p;u	KGLPRPKSAGTATQM-p;u|GRELRRMSDEFVDSF-p;u|PFRGRSRSAPPNLWA-p;u|EIRSRHSSYPAGTED-p;u|LIDSMANSFVGTRSY-p;u|VPVNLLNSPDCDVKT-p;u|VFSVSKQSPPISTSK-p;u|VSGQLIDSMANSFVG-p;u	LIDSMANSFVGTRSY-p;u|VSGQLIDSMANSFVG-p;u|PFRGRSRSAPPNLWA-p;u|VPVNLLNSPDCDVKT-p;u|EIRSRHSSYPAGTED-p;u|VFSVSKQSPPISTSK-p;u|KGLPRPKSAGTATQM-p;u|GRELRRMSDEFVDSF-p;u
KINASE-PSP_CDC7	n=39|NCL_T121|MFAP1_S116|MCM2_S5|CDC7_S318|CLSPN_S1129|TOP2A_S1525|DBF4_S312|CDC7_S216|MCM2_S41|CLSPN_S67|CLSPN_S260|CDC7_S239|NCL_T76|DBF4_T281|CLSPN_S110|CLSPN_S1147|CDC7_S285|CDC7_S277|CDC7_S297|MCM2_S4|CDC7_S296|CLSPN_S704|MCM2_S108|NPM1_S137|PSIP1_S206|MCM2_S40|DBF4_T273|RAD18_S434|MCM2_S53|MCM2_S139|CLSPN_S265|MCM2_S27|NPM1_T199|MCM2_S220|CLSPN_S721|TOP2A_S1213|CLSPN_S744|MCM2_S31|MCM2_S7	39	33.3	28.2	33.3	30.8	30.8	28.2	30.8	30.8	30.8	30.8	30.8	28.2	30.8	30.8	30.8	30.8	30.8	33.3	30.8	30.8	30.8	30.8	28.2	30.8	28.2	30.8	30.8	33.3	33.3	30.8	30.8	30.8	33.3	30.8	30.8	QMAEVLPSPRGQRVI-p;u|LTSSPGRSSRRTDAL-p;u|SVPKSLSSDSTLLLF-p;u|VKKSIRDTPAKNAQK-p;u|EPEVVGESDSEVEGD-p;u|MVKQPCPSESDIITE-p;u|PGKALVATPGKKGAA-p;u|DVEELTASQREAAER-p;u|RRGLLYDSDEEDEER-p;u|RTDALTSSPGRDLPP-p;u|RRTDALTSSPGRDLP-p;u|GNDPLTSSPGRSSRR-p;u|TKKVAVATPAKKAAV-p;u	RRGLLYDSDEEDEER-p;u|EPEVVGESDSEVEGD-p;u|MVKQPCPSESDIITE-p;u|QMAEVLPSPRGQRVI-p;u|DVEELTASQREAAER-p;u|GNDPLTSSPGRSSRR-p;u|RRTDALTSSPGRDLP-p;u|RTDALTSSPGRDLPP-p;u|TKKVAVATPAKKAAV-p;u|PGKALVATPGKKGAA-p;u|VKKSIRDTPAKNAQK-p;u	RRGLLYDSDEEDEER-p;u|GNDPLTSSPGRSSRR-p;u|LTSSPGRSSRRTDAL-p;u|RTDALTSSPGRDLPP-p;u|RRTDALTSSPGRDLP-p;u|SVPKSLSSDSTLLLF-p;u|PGKALVATPGKKGAA-p;u|QMAEVLPSPRGQRVI-p;u|DVEELTASQREAAER-p;u|TKKVAVATPAKKAAV-p;u|MVKQPCPSESDIITE-p;u|EPEVVGESDSEVEGD-p;u|VKKSIRDTPAKNAQK-p;u	EPEVVGESDSEVEGD-p;u|LTSSPGRSSRRTDAL-p;u|MVKQPCPSESDIITE-p;u|QMAEVLPSPRGQRVI-p;u|TKKVAVATPAKKAAV-p;u|DVEELTASQREAAER-p;u|RRTDALTSSPGRDLP-p;u|PGKALVATPGKKGAA-p;u|RRGLLYDSDEEDEER-p;u|GNDPLTSSPGRSSRR-p;u|RTDALTSSPGRDLPP-p;u|VKKSIRDTPAKNAQK-p;u	QMAEVLPSPRGQRVI-p;u|EPEVVGESDSEVEGD-p;u|SVPKSLSSDSTLLLF-p;u|TKKVAVATPAKKAAV-p;u|DVEELTASQREAAER-p;u|MVKQPCPSESDIITE-p;u|RRGLLYDSDEEDEER-p;u|PGKALVATPGKKGAA-p;u|GNDPLTSSPGRSSRR-p;u|RRTDALTSSPGRDLP-p;u|RTDALTSSPGRDLPP-p;u|VKKSIRDTPAKNAQK-p;u	EPEVVGESDSEVEGD-p;u|MVKQPCPSESDIITE-p;u|DVEELTASQREAAER-p;u|QMAEVLPSPRGQRVI-p;u|GNDPLTSSPGRSSRR-p;u|RRGLLYDSDEEDEER-p;u|RRTDALTSSPGRDLP-p;u|RTDALTSSPGRDLPP-p;u|PGKALVATPGKKGAA-p;u|VKKSIRDTPAKNAQK-p;u|TKKVAVATPAKKAAV-p;u	TKKVAVATPAKKAAV-p;u|MVKQPCPSESDIITE-p;u|PGKALVATPGKKGAA-p;u|DVEELTASQREAAER-p;u|SVPKSLSSDSTLLLF-p;u|VKKSIRDTPAKNAQK-p;u|QMAEVLPSPRGQRVI-p;u|GNDPLTSSPGRSSRR-p;u|RRGLLYDSDEEDEER-p;u|EPEVVGESDSEVEGD-p;u|RRTDALTSSPGRDLP-p;u|RTDALTSSPGRDLPP-p;u	MVKQPCPSESDIITE-p;u|EPEVVGESDSEVEGD-p;u|LTSSPGRSSRRTDAL-p;u|DVEELTASQREAAER-p;u|QMAEVLPSPRGQRVI-p;u|PGKALVATPGKKGAA-p;u|RRTDALTSSPGRDLP-p;u|VKKSIRDTPAKNAQK-p;u|TKKVAVATPAKKAAV-p;u|RRGLLYDSDEEDEER-p;u|GNDPLTSSPGRSSRR-p;u|RTDALTSSPGRDLPP-p;u	SVPKSLSSDSTLLLF-p;u|QMAEVLPSPRGQRVI-p;u|MVKQPCPSESDIITE-p;u|EPEVVGESDSEVEGD-p;u|RRGLLYDSDEEDEER-p;u|DVEELTASQREAAER-p;u|GNDPLTSSPGRSSRR-p;u|RRTDALTSSPGRDLP-p;u|RTDALTSSPGRDLPP-p;u|PGKALVATPGKKGAA-p;u|TKKVAVATPAKKAAV-p;u|VKKSIRDTPAKNAQK-p;u	EPEVVGESDSEVEGD-p;u|LTSSPGRSSRRTDAL-p;u|MVKQPCPSESDIITE-p;u|DVEELTASQREAAER-p;u|RRGLLYDSDEEDEER-p;u|GNDPLTSSPGRSSRR-p;u|RRTDALTSSPGRDLP-p;u|RTDALTSSPGRDLPP-p;u|QMAEVLPSPRGQRVI-p;u|VKKSIRDTPAKNAQK-p;u|PGKALVATPGKKGAA-p;u|TKKVAVATPAKKAAV-p;u	RRTDALTSSPGRDLP-p;u|DVEELTASQREAAER-p;u|RRGLLYDSDEEDEER-p;u|RTDALTSSPGRDLPP-p;u|EPEVVGESDSEVEGD-p;u|GNDPLTSSPGRSSRR-p;u|MVKQPCPSESDIITE-p;u|SVPKSLSSDSTLLLF-p;u|QMAEVLPSPRGQRVI-p;u|TKKVAVATPAKKAAV-p;u|PGKALVATPGKKGAA-p;u|VKKSIRDTPAKNAQK-p;u	EPEVVGESDSEVEGD-p;u|MVKQPCPSESDIITE-p;u|DVEELTASQREAAER-p;u|TKKVAVATPAKKAAV-p;u|QMAEVLPSPRGQRVI-p;u|RRTDALTSSPGRDLP-p;u|PGKALVATPGKKGAA-p;u|RRGLLYDSDEEDEER-p;u|RTDALTSSPGRDLPP-p;u|GNDPLTSSPGRSSRR-p;u|VKKSIRDTPAKNAQK-p;u
KINASE-PSP_PKG1/PRKG1	n=39|VASP_S239|RAP1B_S179|GATA4_S262|RHOA_S188|PRKAR1A_S101|SRF_T159|VASP_T278|TBXA2R_T332|CBS_S227|TRPC6_T70|HRH1_S398|RGS18_S216|TBXA2R_S330|FHOD1_S1131|GTF2I_S784|ORAI1_S34|LASP1_S146|PPP1R14A_T38|TRPC3_T11|RAP1GAP2_S7|TRPC6_S322|TTN_S4185|LIPE_S853|RGS2_S46|GTF2I_S743|SLC6A4_T276|TRPC3_S251|PRKG1_S65|PTS_S19|GTF2I_S412|CBS_S525|ARHGEF6_S684|RGS2_S64|VASP_S157|CCDC80_S434|HRH1_S396|CCDC80_S409…	37	18.9	18.9	21.6	16.2	16.2	18.9	21.6	16.2	16.2	18.9	16.2	13.5	16.2	21.6	18.9	16.2	16.2	21.6	16.2	18.9	21.6	18.9	13.5	21.6	18.9	21.6	18.9	18.9	18.9	21.6	18.9	21.6	18.9	16.2	16.2	GIPFRRPSTYGIPRL-p;u|AQVSRRISFSASHRL-p;u|GVPFRRPSTFGIPRL-p;u|MEPERRDSQDGSSYR-p;u|GAKLRKVSKQEEASG-p;u|IAEPMRRSVSEAALA-p;u|GSSTRKDSIPQVLLP-p;u	MEPERRDSQDGSSYR-p;u|GVPFRRPSTFGIPRL-p;u|GIPFRRPSTYGIPRL-p;u|GSSTRKDSIPQVLLP-p;u|RRRRGAISAEVYTEE-p;u|AQVSRRISFSASHRL-p;u|GAKLRKVSKQEEASG-p;u	RRRRGAISAEVYTEE-p;u|GIPFRRPSTYGIPRL-p;u|GVPFRRPSTFGIPRL-p;u|GAKLRKVSKQEEASG-p;u|AQVSRRISFSASHRL-p;u|MEPERRDSQDGSSYR-p;u|GSSTRKDSIPQVLLP-p;u|IAEPMRRSVSEAALA-p;u	MEPERRDSQDGSSYR-p;u|IAEPMRRSVSEAALA-p;u|GAKLRKVSKQEEASG-p;u|AQVSRRISFSASHRL-p;u|GIPFRRPSTYGIPRL-p;u|GVPFRRPSTFGIPRL-p;u	AQVSRRISFSASHRL-p;u|MEPERRDSQDGSSYR-p;u|GVPFRRPSTFGIPRL-p;u|GIPFRRPSTYGIPRL-p;u|RRRRGAISAEVYTEE-p;u|IAEPMRRSVSEAALA-p;u	GVPFRRPSTFGIPRL-p;u|GIPFRRPSTYGIPRL-p;u|RRRRGAISAEVYTEE-p;u|MEPERRDSQDGSSYR-p;u|GSSTRKDSIPQVLLP-p;u|GAKLRKVSKQEEASG-p;u|AQVSRRISFSASHRL-p;u	GSSTRKDSIPQVLLP-p;u|GAKLRKVSKQEEASG-p;u|GVPFRRPSTFGIPRL-p;u|GIPFRRPSTYGIPRL-p;u|MEPERRDSQDGSSYR-p;u|AQVSRRISFSASHRL-p;u|RRRRGAISAEVYTEE-p;u|IAEPMRRSVSEAALA-p;u	GAKLRKVSKQEEASG-p;u|GIPFRRPSTYGIPRL-p;u|GVPFRRPSTFGIPRL-p;u|MEPERRDSQDGSSYR-p;u|IAEPMRRSVSEAALA-p;u|AQVSRRISFSASHRL-p;u	GVPFRRPSTFGIPRL-p;u|GIPFRRPSTYGIPRL-p;u|RRRRGAISAEVYTEE-p;u|IAEPMRRSVSEAALA-p;u|AQVSRRISFSASHRL-p;u|MEPERRDSQDGSSYR-p;u	GIPFRRPSTYGIPRL-p;u|GAKLRKVSKQEEASG-p;u|GVPFRRPSTFGIPRL-p;u|RRRRGAISAEVYTEE-p;u|AQVSRRISFSASHRL-p;u|GSSTRKDSIPQVLLP-p;u|MEPERRDSQDGSSYR-p;u	GIPFRRPSTYGIPRL-p;u|GVPFRRPSTFGIPRL-p;u|MEPERRDSQDGSSYR-p;u|AQVSRRISFSASHRL-p;u|IAEPMRRSVSEAALA-p;u|GSSTRKDSIPQVLLP-p;u	IAEPMRRSVSEAALA-p;u|GVPFRRPSTFGIPRL-p;u|GIPFRRPSTYGIPRL-p;u|MEPERRDSQDGSSYR-p;u|AQVSRRISFSASHRL-p;u
KINASE-PSP_Cot/MAP3K8	n=20|RDX_T564|MAP2K3_S218|EZR_T567|ABL1_T735|CREB1_S133|EIF4G1_S1147|MAP2K6_S207|EIF4EBP1_T70|PLK1_T210|MAP2K1_S222|RPS6KA1_S380|MSN_T558|CDK1_T161|MAP2K1_S218|MAP2K2_S226|HIST1H2BB_S32|PLK1_S137|CHEK1_S345|MAP2K2_S222|NPM1_T199	18	38.9	44.4	44.4	44.4	44.4	44.4	44.4	38.9	44.4	44.4	38.9	44.4	44.4	44.4	44.4	44.4	44.4	44.4	44.4	44.4	44.4	44.4	44.4	44.4	44.4	44.4	44.4	38.9	44.4	44.4	44.4	44.4	38.9	44.4	44.4	HQLFRGFSFVATGLM-p;u|GIPIRVYTHEVVTLW-p;u|VSGQLIDSMANSFVG-p;u|YDGERKKTLCGTPNY-p;u|RNSPVTKTPPRDLPT-p;u|LIDSMANSFVGTRSY-p;u|VKKSIRDTPAKNAQK-p;u	ISGYLVDSVAKTMDA-p;u|RNSPVTKTPPRDLPT-p;u|GIPIRVYTHEVVTLW-p;u|VSGQLIDSMANSFVG-p;u|LIDSMANSFVGTRSY-p;u|YDGERKKTLCGTPNY-p;u|HQLFRGFSFVATGLM-p;u|VKKSIRDTPAKNAQK-p;u	VSGQLIDSMANSFVG-p;u|ISGYLVDSVAKTMDA-p;u|LIDSMANSFVGTRSY-p;u|GIPIRVYTHEVVTLW-p;u|RNSPVTKTPPRDLPT-p;u|YDGERKKTLCGTPNY-p;u|VKKSIRDTPAKNAQK-p;u|HQLFRGFSFVATGLM-p;u	HQLFRGFSFVATGLM-p;u|ISGYLVDSVAKTMDA-p;u|VSGQLIDSMANSFVG-p;u|GIPIRVYTHEVVTLW-p;u|LIDSMANSFVGTRSY-p;u|RNSPVTKTPPRDLPT-p;u|YDGERKKTLCGTPNY-p;u|VKKSIRDTPAKNAQK-p;u	HQLFRGFSFVATGLM-p;u|ISGYLVDSVAKTMDA-p;u|VSGQLIDSMANSFVG-p;u|GIPIRVYTHEVVTLW-p;u|LIDSMANSFVGTRSY-p;u|YDGERKKTLCGTPNY-p;u|RNSPVTKTPPRDLPT-p;u|VKKSIRDTPAKNAQK-p;u	ISGYLVDSVAKTMDA-p;u|HQLFRGFSFVATGLM-p;u|VSGQLIDSMANSFVG-p;u|LIDSMANSFVGTRSY-p;u|RNSPVTKTPPRDLPT-p;u|GIPIRVYTHEVVTLW-p;u|VKKSIRDTPAKNAQK-p;u|YDGERKKTLCGTPNY-p;u	YDGERKKTLCGTPNY-p;u|GIPIRVYTHEVVTLW-p;u|HQLFRGFSFVATGLM-p;u|ISGYLVDSVAKTMDA-p;u|VSGQLIDSMANSFVG-p;u|VKKSIRDTPAKNAQK-p;u|RNSPVTKTPPRDLPT-p;u|LIDSMANSFVGTRSY-p;u	HQLFRGFSFVATGLM-p;u|RNSPVTKTPPRDLPT-p;u|VSGQLIDSMANSFVG-p;u|GIPIRVYTHEVVTLW-p;u|LIDSMANSFVGTRSY-p;u|YDGERKKTLCGTPNY-p;u|VKKSIRDTPAKNAQK-p;u	ISGYLVDSVAKTMDA-p;u|HQLFRGFSFVATGLM-p;u|GIPIRVYTHEVVTLW-p;u|RNSPVTKTPPRDLPT-p;u|VSGQLIDSMANSFVG-p;u|LIDSMANSFVGTRSY-p;u|YDGERKKTLCGTPNY-p;u|VKKSIRDTPAKNAQK-p;u	ISGYLVDSVAKTMDA-p;u|HQLFRGFSFVATGLM-p;u|VSGQLIDSMANSFVG-p;u|GIPIRVYTHEVVTLW-p;u|RNSPVTKTPPRDLPT-p;u|LIDSMANSFVGTRSY-p;u|YDGERKKTLCGTPNY-p;u|VKKSIRDTPAKNAQK-p;u	RNSPVTKTPPRDLPT-p;u|LIDSMANSFVGTRSY-p;u|GIPIRVYTHEVVTLW-p;u|VSGQLIDSMANSFVG-p;u|HQLFRGFSFVATGLM-p;u|YDGERKKTLCGTPNY-p;u|VKKSIRDTPAKNAQK-p;u	HQLFRGFSFVATGLM-p;u|LIDSMANSFVGTRSY-p;u|VSGQLIDSMANSFVG-p;u|ISGYLVDSVAKTMDA-p;u|GIPIRVYTHEVVTLW-p;u|YDGERKKTLCGTPNY-p;u|VKKSIRDTPAKNAQK-p;u|RNSPVTKTPPRDLPT-p;u
KINASE-PSP_CDK6	n=32|RB1_S780|RBL2_T401|FOXM1_T510|CDKN1A_S130|FOXM1_S489|RUNX1_S276|FOXM1_T611|FOXM1_S508|EGLN2_S130|RUNX1_T300|PKM_S37|FOXM1_S522|RB1_T826|RB1_T821|RBL2_S672|CDKN1B_S10|RB1_S795|CELF1_S302|FOXM1_T600|RB1_S807|RB1_S788|FOXM1_T627|FOXM1_T620|RUNX1_S293|RB1_S811|RBL2_S1035|NPM1_T199|FOXM1_S451|RB1_S612|FOXM1_S704|RUNX1_S303|CDKN1B_T187	32	53.1	50	53.1	56.2	56.2	50	50	50	53.1	53.1	50	53.1	56.2	53.1	53.1	56.2	53.1	59.4	56.2	53.1	50	53.1	53.1	53.1	50	50	53.1	53.1	59.4	50	53.1	53.1	53.1	53.1	56.2	NVRVSNGSPSLERMD-p;u|KSYSGLRSPTRCVSE-p;u|MYLSPVRSPKKKGST-p;u|DTRQIQPSPPWSYDQ-p;u|VKKSIRDTPAKNAQK-p;u|ETLPISSTPSKSVLP-p;u|NAGSVEQTPKKPGLR-p;u|MCRLDIDSPPITARN-p;u|IYISPLKSPYKISEG-p;u|STRPPTLSPIPHIPR-p;u|PGGNIYISPLKSPYK-p;u|PIPHIPRSPYKFPSS-p;u|SKALRISTPLTGVRY-p;u|SPYKFPSSPLRIPGG-p;u|KISEGLPTPTKMTPR-p;u|LPTPTKMTPRSRILV-p;u|SGEQAEGSPGGPGDS-p;u	TLYDRYSSPPASTTR-p;u|SGEQAEGSPGGPGDS-p;u|MCRLDIDSPPITARN-p;u|MYLSPVRSPKKKGST-p;u|ETLPISSTPSKSVLP-p;u|PGGNIYISPLKSPYK-p;u|STRPPTLSPIPHIPR-p;u|NVRVSNGSPSLERMD-p;u|PIPHIPRSPYKFPSS-p;u|KISEGLPTPTKMTPR-p;u|SPYKFPSSPLRIPGG-p;u|KSYSGLRSPTRCVSE-p;u|LPTPTKMTPRSRILV-p;u|IYISPLKSPYKISEG-p;u|SKALRISTPLTGVRY-p;u|VKKSIRDTPAKNAQK-p;u	MYLSPVRSPKKKGST-p;u|KSYSGLRSPTRCVSE-p;u|SKALRISTPLTGVRY-p;u|TLYDRYSSPPASTTR-p;u|DTRQIQPSPPWSYDQ-p;u|STRPPTLSPIPHIPR-p;u|ETLPISSTPSKSVLP-p;u|KISEGLPTPTKMTPR-p;u|PGGNIYISPLKSPYK-p;u|IYISPLKSPYKISEG-p;u|PIPHIPRSPYKFPSS-p;u|SPYKFPSSPLRIPGG-p;u|NVRVSNGSPSLERMD-p;u|LPTPTKMTPRSRILV-p;u|VKKSIRDTPAKNAQK-p;u|SGEQAEGSPGGPGDS-p;u|MCRLDIDSPPITARN-p;u	MYLSPVRSPKKKGST-p;u|SGEQAEGSPGGPGDS-p;u|DTRQIQPSPPWSYDQ-p;u|TLYDRYSSPPASTTR-p;u|NVRVSNGSPSLERMD-p;u|IYISPLKSPYKISEG-p;u|NAGSVEQTPKKPGLR-p;u|PGGNIYISPLKSPYK-p;u|MCRLDIDSPPITARN-p;u|PIPHIPRSPYKFPSS-p;u|ETLPISSTPSKSVLP-p;u|SPYKFPSSPLRIPGG-p;u|KSYSGLRSPTRCVSE-p;u|KISEGLPTPTKMTPR-p;u|STRPPTLSPIPHIPR-p;u|SKALRISTPLTGVRY-p;u|LPTPTKMTPRSRILV-p;u|VKKSIRDTPAKNAQK-p;u	MYLSPVRSPKKKGST-p;u|MCRLDIDSPPITARN-p;u|NMDAPPLSPYPFVRT-p;u|TLYDRYSSPPASTTR-p;u|SKALRISTPLTGVRY-p;u|STRPPTLSPIPHIPR-p;u|NVRVSNGSPSLERMD-p;u|NAGSVEQTPKKPGLR-p;u|IYISPLKSPYKISEG-p;u|PIPHIPRSPYKFPSS-p;u|ETLPISSTPSKSVLP-p;u|PGGNIYISPLKSPYK-p;u|KSYSGLRSPTRCVSE-p;u|KISEGLPTPTKMTPR-p;u|LPTPTKMTPRSRILV-p;u|SPYKFPSSPLRIPGG-p;u|VKKSIRDTPAKNAQK-p;u|SGEQAEGSPGGPGDS-p;u	MYLSPVRSPKKKGST-p;u|NVRVSNGSPSLERMD-p;u|IYISPLKSPYKISEG-p;u|STRPPTLSPIPHIPR-p;u|PIPHIPRSPYKFPSS-p;u|PGGNIYISPLKSPYK-p;u|KISEGLPTPTKMTPR-p;u|LPTPTKMTPRSRILV-p;u|MCRLDIDSPPITARN-p;u|SPYKFPSSPLRIPGG-p;u|KSYSGLRSPTRCVSE-p;u|TLYDRYSSPPASTTR-p;u|ETLPISSTPSKSVLP-p;u|SKALRISTPLTGVRY-p;u|VKKSIRDTPAKNAQK-p;u|SGEQAEGSPGGPGDS-p;u	MYLSPVRSPKKKGST-p;u|ETLPISSTPSKSVLP-p;u|MCRLDIDSPPITARN-p;u|KSYSGLRSPTRCVSE-p;u|TLYDRYSSPPASTTR-p;u|NVRVSNGSPSLERMD-p;u|SKALRISTPLTGVRY-p;u|PIPHIPRSPYKFPSS-p;u|VKKSIRDTPAKNAQK-p;u|PGGNIYISPLKSPYK-p;u|KISEGLPTPTKMTPR-p;u|IYISPLKSPYKISEG-p;u|STRPPTLSPIPHIPR-p;u|SPYKFPSSPLRIPGG-p;u|LPTPTKMTPRSRILV-p;u|SGEQAEGSPGGPGDS-p;u	MYLSPVRSPKKKGST-p;u|PIPHIPRSPYKFPSS-p;u|MCRLDIDSPPITARN-p;u|PGGNIYISPLKSPYK-p;u|SPYKFPSSPLRIPGG-p;u|DTRQIQPSPPWSYDQ-p;u|IYISPLKSPYKISEG-p;u|NVRVSNGSPSLERMD-p;u|ETLPISSTPSKSVLP-p;u|KISEGLPTPTKMTPR-p;u|STRPPTLSPIPHIPR-p;u|LPTPTKMTPRSRILV-p;u|NAGSVEQTPKKPGLR-p;u|SKALRISTPLTGVRY-p;u|VKKSIRDTPAKNAQK-p;u|SGEQAEGSPGGPGDS-p;u	MCRLDIDSPPITARN-p;u|KSYSGLRSPTRCVSE-p;u|TLYDRYSSPPASTTR-p;u|NMDAPPLSPYPFVRT-p;u|SKALRISTPLTGVRY-p;u|ETLPISSTPSKSVLP-p;u|SGEQAEGSPGGPGDS-p;u|NAGSVEQTPKKPGLR-p;u|NVRVSNGSPSLERMD-p;u|STRPPTLSPIPHIPR-p;u|KISEGLPTPTKMTPR-p;u|LPTPTKMTPRSRILV-p;u|IYISPLKSPYKISEG-p;u|PIPHIPRSPYKFPSS-p;u|PGGNIYISPLKSPYK-p;u|VKKSIRDTPAKNAQK-p;u|SPYKFPSSPLRIPGG-p;u	PIPHIPRSPYKFPSS-p;u|MYLSPVRSPKKKGST-p;u|PGGNIYISPLKSPYK-p;u|SPYKFPSSPLRIPGG-p;u|MCRLDIDSPPITARN-p;u|DTRQIQPSPPWSYDQ-p;u|LPTPTKMTPRSRILV-p;u|IYISPLKSPYKISEG-p;u|KISEGLPTPTKMTPR-p;u|NVRVSNGSPSLERMD-p;u|TLYDRYSSPPASTTR-p;u|SKALRISTPLTGVRY-p;u|STRPPTLSPIPHIPR-p;u|ETLPISSTPSKSVLP-p;u|KSYSGLRSPTRCVSE-p;u|SGEQAEGSPGGPGDS-p;u|VKKSIRDTPAKNAQK-p;u	MYLSPVRSPKKKGST-p;u|MCRLDIDSPPITARN-p;u|ETLPISSTPSKSVLP-p;u|SGEQAEGSPGGPGDS-p;u|KSYSGLRSPTRCVSE-p;u|NVRVSNGSPSLERMD-p;u|IYISPLKSPYKISEG-p;u|NAGSVEQTPKKPGLR-p;u|STRPPTLSPIPHIPR-p;u|KISEGLPTPTKMTPR-p;u|PIPHIPRSPYKFPSS-p;u|PGGNIYISPLKSPYK-p;u|LPTPTKMTPRSRILV-p;u|VKKSIRDTPAKNAQK-p;u|SPYKFPSSPLRIPGG-p;u|SKALRISTPLTGVRY-p;u	SKALRISTPLTGVRY-p;u|TLYDRYSSPPASTTR-p;u|MYLSPVRSPKKKGST-p;u|PIPHIPRSPYKFPSS-p;u|IYISPLKSPYKISEG-p;u|PGGNIYISPLKSPYK-p;u|MCRLDIDSPPITARN-p;u|KISEGLPTPTKMTPR-p;u|LPTPTKMTPRSRILV-p;u|SPYKFPSSPLRIPGG-p;u|STRPPTLSPIPHIPR-p;u|ETLPISSTPSKSVLP-p;u|NVRVSNGSPSLERMD-p;u|NAGSVEQTPKKPGLR-p;u|VKKSIRDTPAKNAQK-p;u|KSYSGLRSPTRCVSE-p;u|SGEQAEGSPGGPGDS-p;u
KINASE-PSP_Pim1/PIM1	n=39|SKP2_S72|UHRF1_S311|MAP3K5_S83|BAD_S75|CDKN1A_S146|MARK3_T95|RUNX3_S149|POU5F1_S288|IRS1_S1101|MDM2_S166|RUNX3_T155|FOXO3_T32|IRS2_S1149|CDKN1B_T157|CDKN1B_T198|HBP1_S380|NKX3-1_S186|RUNX3_T151|MDM2_S186|HIST1H3A_S10|ABCG2_T362|MARK3_T90|SKP2_T417|RELA_S276|AR_T851|NKX3-1_S195|POU5F1_S289|CXCR4_S339|NKX3-1_S196|NKX3-1_T89|AR_S215|MARK3_S96|RUNX3_T153|CDKN1A_T145|FOXO3_S253|HBP1_S372|NKX3-1_S…	39	12.8	12.8	12.8	12.8	15.4	12.8	12.8	12.8	15.4	12.8	12.8	12.8	12.8	15.4	15.4	12.8	15.4	15.4	15.4	12.8	12.8	15.4	12.8	15.4	12.8	12.8	12.8	12.8	15.4	12.8	15.4	15.4	12.8	12.8	15.4	PPRKRLKSKGSDKDF-p;u|MARQRRASLSCGGPG-p;u|SNLGHPESPPRKRLK-p;u|APRRRAVSMDNSNKY-p;u|EIRSRHSSYPAGTED-p;u	APRRRAVSMDNSNKY-p;u|EIRSRHSSYPAGTED-p;u|MARQRRASLSCGGPG-p;u|PPRKRLKSKGSDKDF-p;u|SNLGHPESPPRKRLK-p;u	PPRKRLKSKGSDKDF-p;u|SNLGHPESPPRKRLK-p;u|APRRRAVSMDNSNKY-p;u|EIRSRHSSYPAGTED-p;u|MARQRRASLSCGGPG-p;u	PPRKRLKSKGSDKDF-p;u|EIRSRHSSYPAGTED-p;u|SNLGHPESPPRKRLK-p;u|APRRRAVSMDNSNKY-p;u|MARQRRASLSCGGPG-p;u	MARQRRASLSCGGPG-p;u|EIRSRHSSYPAGTED-p;u|APRRRAVSMDNSNKY-p;u|QSRPRSCTWPLQRPE-p;u|SNLGHPESPPRKRLK-p;u|PPRKRLKSKGSDKDF-p;u	APRRRAVSMDNSNKY-p;u|MARQRRASLSCGGPG-p;u|PPRKRLKSKGSDKDF-p;u|EIRSRHSSYPAGTED-p;u|SNLGHPESPPRKRLK-p;u	PPRKRLKSKGSDKDF-p;u|MARQRRASLSCGGPG-p;u|SNLGHPESPPRKRLK-p;u|EIRSRHSSYPAGTED-p;u|APRRRAVSMDNSNKY-p;u	MARQRRASLSCGGPG-p;u|APRRRAVSMDNSNKY-p;u|EIRSRHSSYPAGTED-p;u|PPRKRLKSKGSDKDF-p;u|SNLGHPESPPRKRLK-p;u	EIRSRHSSYPAGTED-p;u|MARQRRASLSCGGPG-p;u|SNLGHPESPPRKRLK-p;u|QSRPRSCTWPLQRPE-p;u|PPRKRLKSKGSDKDF-p;u|APRRRAVSMDNSNKY-p;u	PPRKRLKSKGSDKDF-p;u|MARQRRASLSCGGPG-p;u|APRRRAVSMDNSNKY-p;u|EIRSRHSSYPAGTED-p;u|SNLGHPESPPRKRLK-p;u	EIRSRHSSYPAGTED-p;u|MARQRRASLSCGGPG-p;u|PPRKRLKSKGSDKDF-p;u|SNLGHPESPPRKRLK-p;u|APRRRAVSMDNSNKY-p;u	PPRKRLKSKGSDKDF-p;u|APRRRAVSMDNSNKY-p;u|SNLGHPESPPRKRLK-p;u|MARQRRASLSCGGPG-p;u|EIRSRHSSYPAGTED-p;u
KINASE-PSP_ROCK1	n=61|SCRIB_S1508|MARCKS_S159|RDX_T564|RND3_S240|SLC9A1_T653|ARHGAP35_T1173|FHOD1_S1137|ARHGAP24_S391|FHOD1_T1141|EZR_T567|GFAP_S38|PTEN_S229|ARHGAP35_S1236|GFAP_T7|DES_T17|ARHGAP35_S1150|ARHGAP24_S415|ARHGAP19_S422|MYL12B_S20|FHOD1_S1131|DPYSL2_T555|PRMT5_T80|RND3_S11|MYL9_T19|DES_S60|ARHGAP24_T452|PFN1_S138|ARHGAP35_T1226|ADD1_T445|RND3_S218|HIST1H3A_S10|MYL9_S20|DES_T77|ARHGAP24_S437|RND3_S7|AD…	59	18.6	20.3	18.6	20.3	20.3	20.3	18.6	18.6	20.3	16.9	18.6	20.3	20.3	18.6	18.6	20.3	20.3	18.6	20.3	20.3	18.6	18.6	20.3	18.6	20.3	18.6	16.9	18.6	18.6	18.6	18.6	18.6	18.6	20.3	20.3	PKPKPRPSITKATWE-p;u|LERGRKVSIVSKPVL-p;u|RFASYRTSFSVGSDD-p;u|QKRARSRSFSGLIKR-p;u|KKRPQRATSNVFAMF-p;u|RLDRTGSSPTQGIVN-p;u|KRPQRATSNVFAMFD-p;u|EGPPKRVSLVGADDL-p;u|ATKAARKSAPATGGV-p;u|HKLDVSRSPPLMVKK-p;u|WRAARMKSLEQDALR-p;u	EGPPKRVSLVGADDL-p;u|KKRPQRATSNVFAMF-p;u|KRPQRATSNVFAMFD-p;u|PREKRRSTGVSFWTQ-p;u|HKLDVSRSPPLMVKK-p;u|RFASYRTSFSVGSDD-p;u|RLDRTGSSPTQGIVN-p;u|QKRARSRSFSGLIKR-p;u|PKPKPRPSITKATWE-p;u|LERGRKVSIVSKPVL-p;u|WRAARMKSLEQDALR-p;u|ATKAARKSAPATGGV-p;u	QKRARSRSFSGLIKR-p;u|RLDRTGSSPTQGIVN-p;u|RFASYRTSFSVGSDD-p;u|ATKAARKSAPATGGV-p;u|KRPQRATSNVFAMFD-p;u|KKRPQRATSNVFAMF-p;u|EGPPKRVSLVGADDL-p;u|LERGRKVSIVSKPVL-p;u|HKLDVSRSPPLMVKK-p;u|WRAARMKSLEQDALR-p;u|PKPKPRPSITKATWE-p;u	QKRARSRSFSGLIKR-p;u|PKPKPRPSITKATWE-p;u|LERGRKVSIVSKPVL-p;u|ATKAARKSAPATGGV-p;u|EGPPKRVSLVGADDL-p;u|PREKRRSTGVSFWTQ-p;u|RFASYRTSFSVGSDD-p;u|RLDRTGSSPTQGIVN-p;u|KKRPQRATSNVFAMF-p;u|KRPQRATSNVFAMFD-p;u|WRAARMKSLEQDALR-p;u|HKLDVSRSPPLMVKK-p;u	LERGRKVSIVSKPVL-p;u|RFASYRTSFSVGSDD-p;u|PKPKPRPSITKATWE-p;u|PREKRRSTGVSFWTQ-p;u|ATKAARKSAPATGGV-p;u|RLDRTGSSPTQGIVN-p;u|EGPPKRVSLVGADDL-p;u|KKRPQRATSNVFAMF-p;u|QKRARSRSFSGLIKR-p;u|KRPQRATSNVFAMFD-p;u|WRAARMKSLEQDALR-p;u|HKLDVSRSPPLMVKK-p;u	EGPPKRVSLVGADDL-p;u|RFASYRTSFSVGSDD-p;u|PREKRRSTGVSFWTQ-p;u|QKRARSRSFSGLIKR-p;u|WRAARMKSLEQDALR-p;u|RLDRTGSSPTQGIVN-p;u|LERGRKVSIVSKPVL-p;u|PKPKPRPSITKATWE-p;u|KKRPQRATSNVFAMF-p;u|KRPQRATSNVFAMFD-p;u|HKLDVSRSPPLMVKK-p;u|ATKAARKSAPATGGV-p;u	PKPKPRPSITKATWE-p;u|LERGRKVSIVSKPVL-p;u|QKRARSRSFSGLIKR-p;u|ATKAARKSAPATGGV-p;u|RLDRTGSSPTQGIVN-p;u|EGPPKRVSLVGADDL-p;u|RFASYRTSFSVGSDD-p;u|KKRPQRATSNVFAMF-p;u|KRPQRATSNVFAMFD-p;u|HKLDVSRSPPLMVKK-p;u|WRAARMKSLEQDALR-p;u	PKPKPRPSITKATWE-p;u|LERGRKVSIVSKPVL-p;u|EGPPKRVSLVGADDL-p;u|QKRARSRSFSGLIKR-p;u|WRAARMKSLEQDALR-p;u|KRPQRATSNVFAMFD-p;u|RFASYRTSFSVGSDD-p;u|KKRPQRATSNVFAMF-p;u|RLDRTGSSPTQGIVN-p;u|ATKAARKSAPATGGV-p;u|HKLDVSRSPPLMVKK-p;u	RLDRTGSSPTQGIVN-p;u|QKRARSRSFSGLIKR-p;u|PREKRRSTGVSFWTQ-p;u|RFASYRTSFSVGSDD-p;u|EGPPKRVSLVGADDL-p;u|LERGRKVSIVSKPVL-p;u|HKLDVSRSPPLMVKK-p;u|KKRPQRATSNVFAMF-p;u|PKPKPRPSITKATWE-p;u|ATKAARKSAPATGGV-p;u|KRPQRATSNVFAMFD-p;u|WRAARMKSLEQDALR-p;u	QKRARSRSFSGLIKR-p;u|LERGRKVSIVSKPVL-p;u|PKPKPRPSITKATWE-p;u|RLDRTGSSPTQGIVN-p;u|KRPQRATSNVFAMFD-p;u|KKRPQRATSNVFAMF-p;u|EGPPKRVSLVGADDL-p;u|ATKAARKSAPATGGV-p;u|WRAARMKSLEQDALR-p;u|HKLDVSRSPPLMVKK-p;u	RLDRTGSSPTQGIVN-p;u|KKRPQRATSNVFAMF-p;u|KRPQRATSNVFAMFD-p;u|RFASYRTSFSVGSDD-p;u|EGPPKRVSLVGADDL-p;u|ATKAARKSAPATGGV-p;u|WRAARMKSLEQDALR-p;u|QKRARSRSFSGLIKR-p;u|LERGRKVSIVSKPVL-p;u|HKLDVSRSPPLMVKK-p;u|PKPKPRPSITKATWE-p;u	PKPKPRPSITKATWE-p;u|LERGRKVSIVSKPVL-p;u|KRPQRATSNVFAMFD-p;u|WRAARMKSLEQDALR-p;u|KKRPQRATSNVFAMF-p;u|EGPPKRVSLVGADDL-p;u|RFASYRTSFSVGSDD-p;u|PREKRRSTGVSFWTQ-p;u|ATKAARKSAPATGGV-p;u|QKRARSRSFSGLIKR-p;u|RLDRTGSSPTQGIVN-p;u|HKLDVSRSPPLMVKK-p;u
KINASE-PSP_CDK4	n=56|PELP1_S477|RB1_S780|RBL2_T401|FOXM1_T510|FOXO1_S249|FOXM1_S489|SMAD3_S208|DNMT1_S127|MEF2D_S98|FOXM1_T611|BRCA1_S632|FOXM1_S508|EGLN2_S130|TCF3_S245|WDR77_S264|SMAD3_S204|FOXM1_S4|DNMT1_S954|RB1_T356|FOXM1_S522|RB1_T826|RB1_T373|TCF3_S139|SOD2_S106|MDM4_S314|RBL2_S672|RB1_S795|RUNX3_S356|CELF1_S302|FOXM1_T600|TP53_R249|RBL1_S964|RB1_T252|RBL1_S975|RBL1_T369|RB1_S608|GATA4_S105|RB1_S807|RB1_S…	56	37.5	41.1	37.5	41.1	44.6	41.1	39.3	35.7	42.9	39.3	35.7	41.1	41.1	42.9	42.9	41.1	42.9	44.6	44.6	39.3	39.3	42.9	41.1	42.9	41.1	39.3	39.3	37.5	44.6	39.3	42.9	42.9	37.5	42.9	44.6	__MSRVPSPPPPAEM-p;u|KSYSGLRSPTRCVSE-p;u|MYLSPVRSPKKKGST-p;u|ETLPISSTPSKSVLP-p;u|TSVRRRTSFYLPKDA-p;u|LVVSRNLSPPNCTEL-p;u|HIKQQPGSPRRISQQ-p;u|VGMADANSPPKPLSK-p;u|LNSPGPLSPSGMKGT-p;u|IYISPLKSPYKISEG-p;u|___MRKETPPPLVPP-p;u|VNVIPPHTPVRTVMN-p;u|STRPPTLSPIPHIPR-p;u|KRSFAPSTPLTGRRY-p;u|PGGNIYISPLKSPYK-p;u|PIPHIPRSPYKFPSS-p;u|SKALRISTPLTGVRY-p;u|TFNIKLSSPVKRPRK-p;u|SPYKFPSSPLRIPGG-p;u|LPTPTKMTPRSRILV-p;u…	TLYDRYSSPPASTTR-p;u|HIKQQPGSPRRISQQ-p;u|MYLSPVRSPKKKGST-p;u|ETLPISSTPSKSVLP-p;u|KRSFAPSTPLTGRRY-p;u|LVVSRNLSPPNCTEL-p;u|RRDMQPLSPISVHER-p;u|__MSRVPSPPPPAEM-p;u|TSVRRRTSFYLPKDA-p;u|PGGNIYISPLKSPYK-p;u|STRPPTLSPIPHIPR-p;u|PIPHIPRSPYKFPSS-p;u|SPYKFPSSPLRIPGG-p;u|VNVIPPHTPVRTVMN-p;u|KSYSGLRSPTRCVSE-p;u|LPTPTKMTPRSRILV-p;u|IYISPLKSPYKISEG-p;u|SKALRISTPLTGVRY-p;u|LNSPGPLSPSGMKGT-p;u|VGMADANSPPKPLSK-p;u…	MYLSPVRSPKKKGST-p;u|LVVSRNLSPPNCTEL-p;u|VGMADANSPPKPLSK-p;u|TFNIKLSSPVKRPRK-p;u|KSYSGLRSPTRCVSE-p;u|SKALRISTPLTGVRY-p;u|TLYDRYSSPPASTTR-p;u|LNSPGPLSPSGMKGT-p;u|HIKQQPGSPRRISQQ-p;u|___MRKETPPPLVPP-p;u|DSFETQRTPRKSNLD-p;u|STRPPTLSPIPHIPR-p;u|ETLPISSTPSKSVLP-p;u|VNVIPPHTPVRTVMN-p;u|KRSFAPSTPLTGRRY-p;u|PGGNIYISPLKSPYK-p;u|IYISPLKSPYKISEG-p;u|PIPHIPRSPYKFPSS-p;u|SPYKFPSSPLRIPGG-p;u|LPTPTKMTPRSRILV-p;u…	LNSPGPLSPSGMKGT-p;u|MYLSPVRSPKKKGST-p;u|___MRKETPPPLVPP-p;u|RRDMQPLSPISVHER-p;u|HIKQQPGSPRRISQQ-p;u|VGMADANSPPKPLSK-p;u|LVVSRNLSPPNCTEL-p;u|TLYDRYSSPPASTTR-p;u|TFNIKLSSPVKRPRK-p;u|IYISPLKSPYKISEG-p;u|__MSRVPSPPPPAEM-p;u|VNVIPPHTPVRTVMN-p;u|PGGNIYISPLKSPYK-p;u|PIPHIPRSPYKFPSS-p;u|ETLPISSTPSKSVLP-p;u|SPYKFPSSPLRIPGG-p;u|KSYSGLRSPTRCVSE-p;u|KRSFAPSTPLTGRRY-p;u|STRPPTLSPIPHIPR-p;u|SKALRISTPLTGVRY-p;u…	MYLSPVRSPKKKGST-p;u|LNSPGPLSPSGMKGT-p;u|NMDAPPLSPYPFVRT-p;u|TLYDRYSSPPASTTR-p;u|RRDMQPLSPISVHER-p;u|SKALRISTPLTGVRY-p;u|SEEEPKRSPAQQESN-p;u|__MSRVPSPPPPAEM-p;u|STRPPTLSPIPHIPR-p;u|IYISPLKSPYKISEG-p;u|LVVSRNLSPPNCTEL-p;u|PIPHIPRSPYKFPSS-p;u|___MRKETPPPLVPP-p;u|HIKQQPGSPRRISQQ-p;u|VNVIPPHTPVRTVMN-p;u|ETLPISSTPSKSVLP-p;u|PGGNIYISPLKSPYK-p;u|KRSFAPSTPLTGRRY-p;u|KSYSGLRSPTRCVSE-p;u|LPTPTKMTPRSRILV-p;u…	MYLSPVRSPKKKGST-p;u|IYISPLKSPYKISEG-p;u|RRDMQPLSPISVHER-p;u|LNSPGPLSPSGMKGT-p;u|STRPPTLSPIPHIPR-p;u|LVVSRNLSPPNCTEL-p;u|__MSRVPSPPPPAEM-p;u|PIPHIPRSPYKFPSS-p;u|PGGNIYISPLKSPYK-p;u|VNVIPPHTPVRTVMN-p;u|___MRKETPPPLVPP-p;u|LPTPTKMTPRSRILV-p;u|DSFETQRTPRKSNLD-p;u|SPYKFPSSPLRIPGG-p;u|HIKQQPGSPRRISQQ-p;u|KSYSGLRSPTRCVSE-p;u|TLYDRYSSPPASTTR-p;u|VGMADANSPPKPLSK-p;u|ETLPISSTPSKSVLP-p;u|SKALRISTPLTGVRY-p;u…	MYLSPVRSPKKKGST-p;u|ETLPISSTPSKSVLP-p;u|___MRKETPPPLVPP-p;u|KSYSGLRSPTRCVSE-p;u|TLYDRYSSPPASTTR-p;u|VNVIPPHTPVRTVMN-p;u|SKALRISTPLTGVRY-p;u|PIPHIPRSPYKFPSS-p;u|LVVSRNLSPPNCTEL-p;u|TSVRRRTSFYLPKDA-p;u|PGGNIYISPLKSPYK-p;u|IYISPLKSPYKISEG-p;u|TFNIKLSSPVKRPRK-p;u|DSFETQRTPRKSNLD-p;u|LNSPGPLSPSGMKGT-p;u|KRSFAPSTPLTGRRY-p;u|__MSRVPSPPPPAEM-p;u|STRPPTLSPIPHIPR-p;u|VGMADANSPPKPLSK-p;u|SPYKFPSSPLRIPGG-p;u…	MYLSPVRSPKKKGST-p;u|PIPHIPRSPYKFPSS-p;u|___MRKETPPPLVPP-p;u|PGGNIYISPLKSPYK-p;u|HIKQQPGSPRRISQQ-p;u|SPYKFPSSPLRIPGG-p;u|LVVSRNLSPPNCTEL-p;u|__MSRVPSPPPPAEM-p;u|IYISPLKSPYKISEG-p;u|VNVIPPHTPVRTVMN-p;u|ETLPISSTPSKSVLP-p;u|KRSFAPSTPLTGRRY-p;u|STRPPTLSPIPHIPR-p;u|LPTPTKMTPRSRILV-p;u|SKALRISTPLTGVRY-p;u|LNSPGPLSPSGMKGT-p;u|TSVRRRTSFYLPKDA-p;u|TFNIKLSSPVKRPRK-p;u|VGMADANSPPKPLSK-p;u|DSFETQRTPRKSNLD-p;u	KSYSGLRSPTRCVSE-p;u|SEEEPKRSPAQQESN-p;u|TLYDRYSSPPASTTR-p;u|NMDAPPLSPYPFVRT-p;u|SKALRISTPLTGVRY-p;u|ETLPISSTPSKSVLP-p;u|__MSRVPSPPPPAEM-p;u|TFNIKLSSPVKRPRK-p;u|RRDMQPLSPISVHER-p;u|LVVSRNLSPPNCTEL-p;u|___MRKETPPPLVPP-p;u|LNSPGPLSPSGMKGT-p;u|VGMADANSPPKPLSK-p;u|HIKQQPGSPRRISQQ-p;u|VNVIPPHTPVRTVMN-p;u|STRPPTLSPIPHIPR-p;u|KRSFAPSTPLTGRRY-p;u|LPTPTKMTPRSRILV-p;u|TSVRRRTSFYLPKDA-p;u|IYISPLKSPYKISEG-p;u…	PIPHIPRSPYKFPSS-p;u|MYLSPVRSPKKKGST-p;u|PGGNIYISPLKSPYK-p;u|SPYKFPSSPLRIPGG-p;u|DSFETQRTPRKSNLD-p;u|LPTPTKMTPRSRILV-p;u|IYISPLKSPYKISEG-p;u|VNVIPPHTPVRTVMN-p;u|TLYDRYSSPPASTTR-p;u|LVVSRNLSPPNCTEL-p;u|SKALRISTPLTGVRY-p;u|STRPPTLSPIPHIPR-p;u|___MRKETPPPLVPP-p;u|__MSRVPSPPPPAEM-p;u|KRSFAPSTPLTGRRY-p;u|ETLPISSTPSKSVLP-p;u|KSYSGLRSPTRCVSE-p;u|LNSPGPLSPSGMKGT-p;u|HIKQQPGSPRRISQQ-p;u|TFNIKLSSPVKRPRK-p;u…	MYLSPVRSPKKKGST-p;u|___MRKETPPPLVPP-p;u|ETLPISSTPSKSVLP-p;u|__MSRVPSPPPPAEM-p;u|LVVSRNLSPPNCTEL-p;u|KSYSGLRSPTRCVSE-p;u|VNVIPPHTPVRTVMN-p;u|LNSPGPLSPSGMKGT-p;u|IYISPLKSPYKISEG-p;u|STRPPTLSPIPHIPR-p;u|VGMADANSPPKPLSK-p;u|TSVRRRTSFYLPKDA-p;u|TFNIKLSSPVKRPRK-p;u|PIPHIPRSPYKFPSS-p;u|KRSFAPSTPLTGRRY-p;u|PGGNIYISPLKSPYK-p;u|LPTPTKMTPRSRILV-p;u|SPYKFPSSPLRIPGG-p;u|SKALRISTPLTGVRY-p;u|DSFETQRTPRKSNLD-p;u	SKALRISTPLTGVRY-p;u|TLYDRYSSPPASTTR-p;u|MYLSPVRSPKKKGST-p;u|VNVIPPHTPVRTVMN-p;u|RRDMQPLSPISVHER-p;u|LNSPGPLSPSGMKGT-p;u|PIPHIPRSPYKFPSS-p;u|___MRKETPPPLVPP-p;u|IYISPLKSPYKISEG-p;u|PGGNIYISPLKSPYK-p;u|__MSRVPSPPPPAEM-p;u|TSVRRRTSFYLPKDA-p;u|LPTPTKMTPRSRILV-p;u|SPYKFPSSPLRIPGG-p;u|STRPPTLSPIPHIPR-p;u|KRSFAPSTPLTGRRY-p;u|ETLPISSTPSKSVLP-p;u|LVVSRNLSPPNCTEL-p;u|HIKQQPGSPRRISQQ-p;u|KSYSGLRSPTRCVSE-p;u…
KINASE-PSP_PKCD/PRKCD	n=113|HDAC5_S259|PTPRA_S204|HNRNPK_S302|SHOC2_T71|BLVRA_S237|MUC1_T1224|ADD1_S726|NCF1_S370|ENOX2_S504|TNNI3_T143|FOSL1_T217|BEST1_S358|RPS6KB2_S473|NCF1_S303|CARD9_T231|ITGB2_T758|PRKCD_T218|LCP1_S5|TRPV4_S162|SQSTM1_S349|KRT8_S74|GAPDH_T246|NRG1_S286|NCF1_S328|DAP3_S31|STAT1_S727|PRKCD_S503|RPS6_S235|ITGB2_S745|PRKCD_S299|SLC29A1_S281|DAP3_S280|CTTN_S405|DAB2_S24|PTPN22_S35|PRKD1_S742|PRKCD_S30…	113	21.2	21.2	20.4	21.2	20.4	21.2	21.2	21.2	21.2	21.2	22.1	22.1	21.2	20.4	21.2	21.2	21.2	20.4	20.4	19.5	21.2	21.2	22.1	20.4	21.2	21.2	21.2	21.2	19.5	21.2	21.2	20.4	21.2	19.5	20.4	RASRRSDSASSEPVG-p;u|TQRASRRSDSASSEP-p;u|___MARGSVSDEEMM-p;u|KTQTPPVSPAPQPTE-p;u|SGRPRTTSFAESCKP-p;u|LNEKARLSYSDKNLI-p;u|GEKSFRRSVVGTPAY-p;u|SGRARTSSFAEPGGG-p;u|EEWTRHGSFVNKPTR-p;u|KKKFRTPSFLKKSKK-p;u|TRNDVAPTLMSVPRY-p;u|IAKRRRLSSLRASTS-p;u|QAGSHSNSFRLSNGR-p;u|AKRRRLSSLRASTSK-p;u|NTIDLPMSPRTLDSL-p;u|KPFPAPQTPGRLQPA-p;u|MVGGKPGSFRVRASS-p;u|PIPIMPASPQKGHAV-p;u|TRRSRTESITATSPA-p;u|TDNLLPMSPEEFDEV-p;u…	TQRASRRSDSASSEP-p;u|KPFPAPQTPGRLQPA-p;u|EEWTRHGSFVNKPTR-p;u|TRNDVAPTLMSVPRY-p;u|MVGGKPGSFRVRASS-p;u|GEKSFRRSVVGTPAY-p;u|NTIDLPMSPRTLDSL-p;u|TDNLLPMSPEEFDEV-p;u|RASRRSDSASSEPVG-p;u|TRRSRTESITATSPA-p;u|KTQTPPVSPAPQPTE-p;u|SGRPRTTSFAESCKP-p;u|KKKFRTPSFLKKSKK-p;u|KDEILPTTPISEQKG-p;u|GDKILQVSFKTNKSH-p;u|LNEKARLSYSDKNLI-p;u|SGRARTSSFAEPGGG-p;u|PIPIMPASPQKGHAV-p;u|LKRNRYLSFHFKSGS-p;u|QAGSHSNSFRLSNGR-p;u…	FPLRKTASEPNLKVR-p;u|PIPIMPASPQKGHAV-p;u|MVGGKPGSFRVRASS-p;u|TRRSRTESITATSPA-p;u|SGRARTSSFAEPGGG-p;u|SGRPRTTSFAESCKP-p;u|EEWTRHGSFVNKPTR-p;u|TDNLLPMSPEEFDEV-p;u|KPFPAPQTPGRLQPA-p;u|QAGSHSNSFRLSNGR-p;u|KTQTPPVSPAPQPTE-p;u|TQRASRRSDSASSEP-p;u|NTIDLPMSPRTLDSL-p;u|KDEILPTTPISEQKG-p;u|GEKSFRRSVVGTPAY-p;u|RASRRSDSASSEPVG-p;u|TRNDVAPTLMSVPRY-p;u|LNEKARLSYSDKNLI-p;u|KKKFRTPSFLKKSKK-p;u|IAKRRRLSSLRASTS-p;u…	KKKFRTPSFLKKSKK-p;u|SGRPRTTSFAESCKP-p;u|EEWTRHGSFVNKPTR-p;u|TDNLLPMSPEEFDEV-p;u|SGRARTSSFAEPGGG-p;u|KPFPAPQTPGRLQPA-p;u|QAGSHSNSFRLSNGR-p;u|NTIDLPMSPRTLDSL-p;u|IAKRRRLSSLRASTS-p;u|TRNDVAPTLMSVPRY-p;u|RASRRSDSASSEPVG-p;u|PIPIMPASPQKGHAV-p;u|KTQTPPVSPAPQPTE-p;u|TRRSRTESITATSPA-p;u|FPLRKTASEPNLKVR-p;u|GEKSFRRSVVGTPAY-p;u|KDEILPTTPISEQKG-p;u|MVGGKPGSFRVRASS-p;u|AKRRRLSSLRASTSK-p;u|RYVPPSSTDRSPYEK-p;u…	TQRASRRSDSASSEP-p;u|RASRRSDSASSEPVG-p;u|EEWTRHGSFVNKPTR-p;u|LNEKARLSYSDKNLI-p;u|KPFPAPQTPGRLQPA-p;u|SGRARTSSFAEPGGG-p;u|KTQTPPVSPAPQPTE-p;u|SGRPRTTSFAESCKP-p;u|FPLRKTASEPNLKVR-p;u|GDKILQVSFKTNKSH-p;u|KDEILPTTPISEQKG-p;u|NTIDLPMSPRTLDSL-p;u|TDNLLPMSPEEFDEV-p;u|___MARGSVSDEEMM-p;u|PIPIMPASPQKGHAV-p;u|MVGGKPGSFRVRASS-p;u|TRRSRTESITATSPA-p;u|GEKSFRRSVVGTPAY-p;u|QAGSHSNSFRLSNGR-p;u|KKKFRTPSFLKKSKK-p;u…	TQRASRRSDSASSEP-p;u|RASRRSDSASSEPVG-p;u|EEWTRHGSFVNKPTR-p;u|KTQTPPVSPAPQPTE-p;u|KPFPAPQTPGRLQPA-p;u|SGRPRTTSFAESCKP-p;u|NTIDLPMSPRTLDSL-p;u|GDKILQVSFKTNKSH-p;u|GEKSFRRSVVGTPAY-p;u|TDNLLPMSPEEFDEV-p;u|TRNDVAPTLMSVPRY-p;u|TRRSRTESITATSPA-p;u|QAGSHSNSFRLSNGR-p;u|KDEILPTTPISEQKG-p;u|KKKFRTPSFLKKSKK-p;u|LNEKARLSYSDKNLI-p;u|PIPIMPASPQKGHAV-p;u|FPLRKTASEPNLKVR-p;u|SGRARTSSFAEPGGG-p;u|MVGGKPGSFRVRASS-p;u…	KPFPAPQTPGRLQPA-p;u|GDKILQVSFKTNKSH-p;u|RASRRSDSASSEPVG-p;u|TQRASRRSDSASSEP-p;u|LNEKARLSYSDKNLI-p;u|TRNDVAPTLMSVPRY-p;u|FPLRKTASEPNLKVR-p;u|LKRNRYLSFHFKSGS-p;u|KDEILPTTPISEQKG-p;u|IAKRRRLSSLRASTS-p;u|PIPIMPASPQKGHAV-p;u|TRRSRTESITATSPA-p;u|KTQTPPVSPAPQPTE-p;u|EEWTRHGSFVNKPTR-p;u|AKRRRLSSLRASTSK-p;u|SGRPRTTSFAESCKP-p;u|NTIDLPMSPRTLDSL-p;u|SGRARTSSFAEPGGG-p;u|GEKSFRRSVVGTPAY-p;u|TDNLLPMSPEEFDEV-p;u…	EEWTRHGSFVNKPTR-p;u|TQRASRRSDSASSEP-p;u|RASRRSDSASSEPVG-p;u|QAGSHSNSFRLSNGR-p;u|LNEKARLSYSDKNLI-p;u|KPFPAPQTPGRLQPA-p;u|SGRARTSSFAEPGGG-p;u|KDEILPTTPISEQKG-p;u|SGRPRTTSFAESCKP-p;u|KTQTPPVSPAPQPTE-p;u|TRNDVAPTLMSVPRY-p;u|MVGGKPGSFRVRASS-p;u|RYVPPSSTDRSPYEK-p;u|NTIDLPMSPRTLDSL-p;u|PIPIMPASPQKGHAV-p;u|KKKFRTPSFLKKSKK-p;u|GEKSFRRSVVGTPAY-p;u|FPLRKTASEPNLKVR-p;u|TDNLLPMSPEEFDEV-p;u|IAKRRRLSSLRASTS-p;u…	TRRSRTESITATSPA-p;u|MVGGKPGSFRVRASS-p;u|QAGSHSNSFRLSNGR-p;u|FPLRKTASEPNLKVR-p;u|KDEILPTTPISEQKG-p;u|KTQTPPVSPAPQPTE-p;u|PIPIMPASPQKGHAV-p;u|LKRNRYLSFHFKSGS-p;u|RYVPPSSTDRSPYEK-p;u|TQRASRRSDSASSEP-p;u|TRNDVAPTLMSVPRY-p;u|NTIDLPMSPRTLDSL-p;u|TDNLLPMSPEEFDEV-p;u|SGRARTSSFAEPGGG-p;u|RASRRSDSASSEPVG-p;u|EEWTRHGSFVNKPTR-p;u|GEKSFRRSVVGTPAY-p;u|LNEKARLSYSDKNLI-p;u|SGRPRTTSFAESCKP-p;u|___MARGSVSDEEMM-p;u…	TQRASRRSDSASSEP-p;u|EEWTRHGSFVNKPTR-p;u|FPLRKTASEPNLKVR-p;u|RASRRSDSASSEPVG-p;u|GDKILQVSFKTNKSH-p;u|SGRARTSSFAEPGGG-p;u|KTQTPPVSPAPQPTE-p;u|QAGSHSNSFRLSNGR-p;u|SGRPRTTSFAESCKP-p;u|KDEILPTTPISEQKG-p;u|KPFPAPQTPGRLQPA-p;u|TRNDVAPTLMSVPRY-p;u|TDNLLPMSPEEFDEV-p;u|NTIDLPMSPRTLDSL-p;u|LNEKARLSYSDKNLI-p;u|TRRSRTESITATSPA-p;u|IAKRRRLSSLRASTS-p;u|PIPIMPASPQKGHAV-p;u|GEKSFRRSVVGTPAY-p;u|MVGGKPGSFRVRASS-p;u…	EEWTRHGSFVNKPTR-p;u|KTQTPPVSPAPQPTE-p;u|TDNLLPMSPEEFDEV-p;u|KDEILPTTPISEQKG-p;u|KPFPAPQTPGRLQPA-p;u|SGRPRTTSFAESCKP-p;u|NTIDLPMSPRTLDSL-p;u|PIPIMPASPQKGHAV-p;u|RYVPPSSTDRSPYEK-p;u|TQRASRRSDSASSEP-p;u|RASRRSDSASSEPVG-p;u|GEKSFRRSVVGTPAY-p;u|KKKFRTPSFLKKSKK-p;u|MVGGKPGSFRVRASS-p;u|GDKILQVSFKTNKSH-p;u|SGRARTSSFAEPGGG-p;u|LNEKARLSYSDKNLI-p;u|TRNDVAPTLMSVPRY-p;u|FPLRKTASEPNLKVR-p;u|TRRSRTESITATSPA-p;u…	EEWTRHGSFVNKPTR-p;u|KKKFRTPSFLKKSKK-p;u|TQRASRRSDSASSEP-p;u|GEKSFRRSVVGTPAY-p;u|SGRPRTTSFAESCKP-p;u|RASRRSDSASSEPVG-p;u|MVGGKPGSFRVRASS-p;u|KPFPAPQTPGRLQPA-p;u|TRNDVAPTLMSVPRY-p;u|LNEKARLSYSDKNLI-p;u|SGRARTSSFAEPGGG-p;u|KTQTPPVSPAPQPTE-p;u|TRRSRTESITATSPA-p;u|FPLRKTASEPNLKVR-p;u|TDNLLPMSPEEFDEV-p;u|NTIDLPMSPRTLDSL-p;u|QAGSHSNSFRLSNGR-p;u|GDKILQVSFKTNKSH-p;u|KDEILPTTPISEQKG-p;u|RYVPPSSTDRSPYEK-p;u…
KINASE-PSP_RSK2/RPS6KA3	n=49|NFATC4_S285|NFATC4_S289|MAP3K5_S83|BAD_S75|WWC1_S947|CASP8_T263|CREB1_S133|GSK3B_S9|RANBP3_S126|NFATC4_S281|TH_S44|EIF2AK2_T451|ESR1_S167|RPS6_S236|YBX1_S102|TINF2_S295|HIST1H3A_S10|RRN3_S649|TINF2_S330|TH_S67|MAP3K5_T1326|LCP1_S5|TBX21_S503|TBX21_S507|MAP3K5_T1109|DAPK1_S289|TH_S71|PPP1R3A_S46|ATF4_S245|FOXN2_S369|FOXN2_S365|STAT3_S727|HIST1H2BB_S32|FGFR1_S789|STMN1_S16|EPHA2_S897|RPS6_S235…	46	37	37	37	37	34.8	37	37	37	37	39.1	34.8	37	37	34.8	34.8	37	37	37	34.8	37	37	34.8	37	34.8	37	37	39.1	37	34.8	37	34.8	34.8	37	32.6	34.8	___MARGSVSDEEMM-p;u|NPRKYLRSVGDGETV-p;u|SGRPRTTSFAESCKP-p;u|SGRARTSSFAEPGGG-p;u|QALSRKASAVNMEKF-p;u|IAKRRRLSSLRASTS-p;u|FPFRNLGSPTQVISK-p;u|AKRRRLSSLRASTSK-p;u|EIRSRHSSYPAGTED-p;u|NTIDLPMSPRTLDSL-p;u|CRLNRSDSDSSTLSK-p;u|KELEKRASGQAFELI-p;u|PFRGRSRSAPPNLWA-p;u|VKRERTSSLTQFPPS-p;u|RVSIRLPSTSGSEGV-p;u|ASTGKSKSPCQTLGG-p;u|PGKRRTQSLSALPKE-p;u	QALSRKASAVNMEKF-p;u|CRLNRSDSDSSTLSK-p;u|PFRGRSRSAPPNLWA-p;u|KELEKRASGQAFELI-p;u|NTIDLPMSPRTLDSL-p;u|SGRPRTTSFAESCKP-p;u|EIRSRHSSYPAGTED-p;u|VKRERTSSLTQFPPS-p;u|PALSRRGSLGEEGSE-p;u|ASTGKSKSPCQTLGG-p;u|SGRARTSSFAEPGGG-p;u|RVSIRLPSTSGSEGV-p;u|NPRKYLRSVGDGETV-p;u|IAKRRRLSSLRASTS-p;u|AKRRRLSSLRASTSK-p;u|PGKRRTQSLSALPKE-p;u|___MARGSVSDEEMM-p;u	FPFRNLGSPTQVISK-p;u|VKRERTSSLTQFPPS-p;u|EIRSRHSSYPAGTED-p;u|KELEKRASGQAFELI-p;u|SGRARTSSFAEPGGG-p;u|ASTGKSKSPCQTLGG-p;u|SGRPRTTSFAESCKP-p;u|PFRGRSRSAPPNLWA-p;u|PALSRRGSLGEEGSE-p;u|NTIDLPMSPRTLDSL-p;u|CRLNRSDSDSSTLSK-p;u|NPRKYLRSVGDGETV-p;u|RVSIRLPSTSGSEGV-p;u|IAKRRRLSSLRASTS-p;u|PGKRRTQSLSALPKE-p;u|AKRRRLSSLRASTSK-p;u|___MARGSVSDEEMM-p;u	SGRPRTTSFAESCKP-p;u|SGRARTSSFAEPGGG-p;u|PFRGRSRSAPPNLWA-p;u|EIRSRHSSYPAGTED-p;u|NTIDLPMSPRTLDSL-p;u|FPFRNLGSPTQVISK-p;u|VKRERTSSLTQFPPS-p;u|CRLNRSDSDSSTLSK-p;u|IAKRRRLSSLRASTS-p;u|KELEKRASGQAFELI-p;u|ASTGKSKSPCQTLGG-p;u|RVSIRLPSTSGSEGV-p;u|AKRRRLSSLRASTSK-p;u|NPRKYLRSVGDGETV-p;u|QALSRKASAVNMEKF-p;u|___MARGSVSDEEMM-p;u|PGKRRTQSLSALPKE-p;u	CRLNRSDSDSSTLSK-p;u|SGRARTSSFAEPGGG-p;u|SGRPRTTSFAESCKP-p;u|EIRSRHSSYPAGTED-p;u|NTIDLPMSPRTLDSL-p;u|VKRERTSSLTQFPPS-p;u|RVSIRLPSTSGSEGV-p;u|___MARGSVSDEEMM-p;u|NPRKYLRSVGDGETV-p;u|PFRGRSRSAPPNLWA-p;u|ASTGKSKSPCQTLGG-p;u|PGKRRTQSLSALPKE-p;u|QALSRKASAVNMEKF-p;u|KELEKRASGQAFELI-p;u|AKRRRLSSLRASTSK-p;u|IAKRRRLSSLRASTS-p;u	NPRKYLRSVGDGETV-p;u|CRLNRSDSDSSTLSK-p;u|SGRPRTTSFAESCKP-p;u|NTIDLPMSPRTLDSL-p;u|VKRERTSSLTQFPPS-p;u|EIRSRHSSYPAGTED-p;u|PFRGRSRSAPPNLWA-p;u|PALSRRGSLGEEGSE-p;u|SGRARTSSFAEPGGG-p;u|RVSIRLPSTSGSEGV-p;u|ASTGKSKSPCQTLGG-p;u|PGKRRTQSLSALPKE-p;u|QALSRKASAVNMEKF-p;u|IAKRRRLSSLRASTS-p;u|AKRRRLSSLRASTSK-p;u|KELEKRASGQAFELI-p;u|___MARGSVSDEEMM-p;u	PALSRRGSLGEEGSE-p;u|PFRGRSRSAPPNLWA-p;u|PGKRRTQSLSALPKE-p;u|NPRKYLRSVGDGETV-p;u|EIRSRHSSYPAGTED-p;u|IAKRRRLSSLRASTS-p;u|QALSRKASAVNMEKF-p;u|VKRERTSSLTQFPPS-p;u|AKRRRLSSLRASTSK-p;u|SGRPRTTSFAESCKP-p;u|NTIDLPMSPRTLDSL-p;u|SGRARTSSFAEPGGG-p;u|FPFRNLGSPTQVISK-p;u|KELEKRASGQAFELI-p;u|RVSIRLPSTSGSEGV-p;u|CRLNRSDSDSSTLSK-p;u|___MARGSVSDEEMM-p;u	PFRGRSRSAPPNLWA-p;u|CRLNRSDSDSSTLSK-p;u|SGRARTSSFAEPGGG-p;u|EIRSRHSSYPAGTED-p;u|SGRPRTTSFAESCKP-p;u|FPFRNLGSPTQVISK-p;u|VKRERTSSLTQFPPS-p;u|RVSIRLPSTSGSEGV-p;u|NTIDLPMSPRTLDSL-p;u|NPRKYLRSVGDGETV-p;u|IAKRRRLSSLRASTS-p;u|PGKRRTQSLSALPKE-p;u|ASTGKSKSPCQTLGG-p;u|QALSRKASAVNMEKF-p;u|AKRRRLSSLRASTSK-p;u|___MARGSVSDEEMM-p;u|KELEKRASGQAFELI-p;u	EIRSRHSSYPAGTED-p;u|ASTGKSKSPCQTLGG-p;u|VKRERTSSLTQFPPS-p;u|NPRKYLRSVGDGETV-p;u|PFRGRSRSAPPNLWA-p;u|RVSIRLPSTSGSEGV-p;u|PGKRRTQSLSALPKE-p;u|FPFRNLGSPTQVISK-p;u|NTIDLPMSPRTLDSL-p;u|CRLNRSDSDSSTLSK-p;u|SGRARTSSFAEPGGG-p;u|KELEKRASGQAFELI-p;u|SGRPRTTSFAESCKP-p;u|___MARGSVSDEEMM-p;u|IAKRRRLSSLRASTS-p;u|AKRRRLSSLRASTSK-p;u|QALSRKASAVNMEKF-p;u	SGRARTSSFAEPGGG-p;u|NPRKYLRSVGDGETV-p;u|SGRPRTTSFAESCKP-p;u|PGKRRTQSLSALPKE-p;u|PFRGRSRSAPPNLWA-p;u|CRLNRSDSDSSTLSK-p;u|NTIDLPMSPRTLDSL-p;u|VKRERTSSLTQFPPS-p;u|FPFRNLGSPTQVISK-p;u|EIRSRHSSYPAGTED-p;u|IAKRRRLSSLRASTS-p;u|PALSRRGSLGEEGSE-p;u|ASTGKSKSPCQTLGG-p;u|QALSRKASAVNMEKF-p;u|RVSIRLPSTSGSEGV-p;u|AKRRRLSSLRASTSK-p;u|___MARGSVSDEEMM-p;u|KELEKRASGQAFELI-p;u	PFRGRSRSAPPNLWA-p;u|FPFRNLGSPTQVISK-p;u|SGRPRTTSFAESCKP-p;u|EIRSRHSSYPAGTED-p;u|NTIDLPMSPRTLDSL-p;u|RVSIRLPSTSGSEGV-p;u|VKRERTSSLTQFPPS-p;u|SGRARTSSFAEPGGG-p;u|PGKRRTQSLSALPKE-p;u|NPRKYLRSVGDGETV-p;u|QALSRKASAVNMEKF-p;u|CRLNRSDSDSSTLSK-p;u|IAKRRRLSSLRASTS-p;u|KELEKRASGQAFELI-p;u|AKRRRLSSLRASTSK-p;u|___MARGSVSDEEMM-p;u	CRLNRSDSDSSTLSK-p;u|SGRPRTTSFAESCKP-p;u|SGRARTSSFAEPGGG-p;u|KELEKRASGQAFELI-p;u|PFRGRSRSAPPNLWA-p;u|PGKRRTQSLSALPKE-p;u|EIRSRHSSYPAGTED-p;u|VKRERTSSLTQFPPS-p;u|RVSIRLPSTSGSEGV-p;u|NTIDLPMSPRTLDSL-p;u|NPRKYLRSVGDGETV-p;u|FPFRNLGSPTQVISK-p;u|ASTGKSKSPCQTLGG-p;u|QALSRKASAVNMEKF-p;u|___MARGSVSDEEMM-p;u|IAKRRRLSSLRASTS-p;u|AKRRRLSSLRASTSK-p;u
KINASE-PSP_P38B/MAPK11	n=26|SOD2_T79|MAPK11_T241|EEF2K_S396|HSF1_S307|RPTOR_S771|E2F1_T433|EGFR_S1039|RPTOR_S863|MAPKAPK5_T182|MAPK11_S261|CDC25B_S249|HSF1_S303|HNF4A_S167|SOD2_S106|EGFR_T1041|ATF7_T51|GYS1_S727|HSF1_S326|GYS1_T721|PRKCE_S350|GYS1_S653|GYS1_S645|E2F1_S403|EWSR1_T79|CCND3_T283|NR3C1_S226	26	42.3	42.3	42.3	42.3	46.2	42.3	42.3	42.3	46.2	42.3	42.3	42.3	42.3	50	46.2	42.3	46.2	50	46.2	42.3	42.3	46.2	42.3	50	42.3	42.3	42.3	42.3	46.2	42.3	46.2	50	42.3	46.2	46.2	VLSRQITSPVSGING-p;u|SSVDTLLSPTALIDS-p;u|IDQGDLMTPQFTPYY-p;u|TPLLSSLSATSNNST-p;u|RPASVPPSPSLSRHS-p;u|KMEVEELSPLALGRF-p;u|SVIIADQTPTPTRFL-p;u|EPPSPPQSPRVEEAS-p;u|LTQSAPASPTNKGVH-p;u|STPSEPLSPTSSLGE-p;u|RVKEEPPSPPQSPRV-p;u	TPLLSSLSATSNNST-p;u|LLSSLSATSNNSTVA-p;u|RVKEEPPSPPQSPRV-p;u|RPASVPPSPSLSRHS-p;u|EPPSPPQSPRVEEAS-p;u|STPSEPLSPTSSLGE-p;u|SSVDTLLSPTALIDS-p;u|SVIIADQTPTPTRFL-p;u|IDQGDLMTPQFTPYY-p;u|LTQSAPASPTNKGVH-p;u|VLSRQITSPVSGING-p;u	VLSRQITSPVSGING-p;u|IDQGDLMTPQFTPYY-p;u|SSVDTLLSPTALIDS-p;u|LTQSAPASPTNKGVH-p;u|STPSEPLSPTSSLGE-p;u|EPPSPPQSPRVEEAS-p;u|RVKEEPPSPPQSPRV-p;u|TPLLSSLSATSNNST-p;u|LLSSLSATSNNSTVA-p;u|SVIIADQTPTPTRFL-p;u|RPASVPPSPSLSRHS-p;u	IDQGDLMTPQFTPYY-p;u|SVIIADQTPTPTRFL-p;u|SSVDTLLSPTALIDS-p;u|VLSRQITSPVSGING-p;u|RPASVPPSPSLSRHS-p;u|TPLLSSLSATSNNST-p;u|LTQSAPASPTNKGVH-p;u|EPPSPPQSPRVEEAS-p;u|STPSEPLSPTSSLGE-p;u|RVKEEPPSPPQSPRV-p;u|KMEVEELSPLALGRF-p;u	TPLLSSLSATSNNST-p;u|VLSRQITSPVSGING-p;u|IDQGDLMTPQFTPYY-p;u|SSVDTLLSPTALIDS-p;u|EPPSPPQSPRVEEAS-p;u|KMEVEELSPLALGRF-p;u|SVIIADQTPTPTRFL-p;u|RVKEEPPSPPQSPRV-p;u|ATSSSLSTPSEPLSP-p;u|LTQSAPASPTNKGVH-p;u|RPASVPPSPSLSRHS-p;u|STPSEPLSPTSSLGE-p;u	VLSRQITSPVSGING-p;u|SSVDTLLSPTALIDS-p;u|TPLLSSLSATSNNST-p;u|IDQGDLMTPQFTPYY-p;u|EPPSPPQSPRVEEAS-p;u|SVIIADQTPTPTRFL-p;u|RVKEEPPSPPQSPRV-p;u|LTQSAPASPTNKGVH-p;u|STPSEPLSPTSSLGE-p;u|RPASVPPSPSLSRHS-p;u|LLSSLSATSNNSTVA-p;u	IDQGDLMTPQFTPYY-p;u|SVIIADQTPTPTRFL-p;u|TPLLSSLSATSNNST-p;u|VLSRQITSPVSGING-p;u|RVKEEPPSPPQSPRV-p;u|RPASVPPSPSLSRHS-p;u|EPPSPPQSPRVEEAS-p;u|LTQSAPASPTNKGVH-p;u|STPSEPLSPTSSLGE-p;u|LLSSLSATSNNSTVA-p;u|SSVDTLLSPTALIDS-p;u	RPASVPPSPSLSRHS-p;u|IDQGDLMTPQFTPYY-p;u|VLSRQITSPVSGING-p;u|TPLLSSLSATSNNST-p;u|SVIIADQTPTPTRFL-p;u|SSVDTLLSPTALIDS-p;u|EPPSPPQSPRVEEAS-p;u|RVKEEPPSPPQSPRV-p;u|LTQSAPASPTNKGVH-p;u|KMEVEELSPLALGRF-p;u|STPSEPLSPTSSLGE-p;u	TPLLSSLSATSNNST-p;u|IDQGDLMTPQFTPYY-p;u|RVKEEPPSPPQSPRV-p;u|LTQSAPASPTNKGVH-p;u|EPPSPPQSPRVEEAS-p;u|RPASVPPSPSLSRHS-p;u|SVIIADQTPTPTRFL-p;u|ATSSSLSTPSEPLSP-p;u|STPSEPLSPTSSLGE-p;u|KMEVEELSPLALGRF-p;u|VLSRQITSPVSGING-p;u|SSVDTLLSPTALIDS-p;u	IDQGDLMTPQFTPYY-p;u|VLSRQITSPVSGING-p;u|RVKEEPPSPPQSPRV-p;u|SVIIADQTPTPTRFL-p;u|TPLLSSLSATSNNST-p;u|LTQSAPASPTNKGVH-p;u|EPPSPPQSPRVEEAS-p;u|STPSEPLSPTSSLGE-p;u|RPASVPPSPSLSRHS-p;u|SSVDTLLSPTALIDS-p;u|LLSSLSATSNNSTVA-p;u	IDQGDLMTPQFTPYY-p;u|VLSRQITSPVSGING-p;u|RPASVPPSPSLSRHS-p;u|SSVDTLLSPTALIDS-p;u|STPSEPLSPTSSLGE-p;u|TPLLSSLSATSNNST-p;u|LTQSAPASPTNKGVH-p;u|SVIIADQTPTPTRFL-p;u|EPPSPPQSPRVEEAS-p;u|KMEVEELSPLALGRF-p;u|RVKEEPPSPPQSPRV-p;u	IDQGDLMTPQFTPYY-p;u|KMEVEELSPLALGRF-p;u|RPASVPPSPSLSRHS-p;u|TPLLSSLSATSNNST-p;u|VLSRQITSPVSGING-p;u|LTQSAPASPTNKGVH-p;u|RVKEEPPSPPQSPRV-p;u|STPSEPLSPTSSLGE-p;u|SVIIADQTPTPTRFL-p;u|EPPSPPQSPRVEEAS-p;u|SSVDTLLSPTALIDS-p;u
KINASE-PSP_ChaK1/TRPM7	n=53|TRPM7_S1193|TRPM7_S1477|TRPM7_S1860|TRPM7_T1471|TRPM7_S1569|TRPM7_T1583|TRPM7_T1830|MYH9_S1808|TRPM7_T1482|TRPM7_S1258|TRPM7_S1287|TRPM7_T1537|TRPM7_S1615|TRPM7_S1446|MYH9_S1803|TRPM7_S1456|TRPM7_S1255|TRPM7_S1404|TRPM7_S1387|TRPM7_T1405|ANXA1_S5|TRPM7_T1455|TRPM7_S1779|TRPM7_T1163|TRPM7_S1390|TRPM7_T1435|TRPM7_T1265|TRPM7_T1542|TRPM7_S1476|TRPM7_S1463|TRPM7_S1598|TRPM7_S1567|EEF2K_S78|TRPM7…	53	15.1	18.9	18.9	13.2	17	18.9	18.9	11.3	18.9	18.9	17	18.9	13.2	18.9	18.9	13.2	18.9	18.9	17	17	18.9	18.9	18.9	18.9	18.9	18.9	18.9	15.1	17	18.9	18.9	18.9	15.1	17	17	LNLQPGNSTKESEST-p;u|KISRRPSTEDTHEVD-p;u|EDTHEVDSKAALIPD-p;u|DWLQDRPSNREMPSE-p;u|NTLKRVSSLAGFTDC-p;u|NLMRLSQSIPFTPVP-p;u|PPTKFFVSTPSQPSC-p;u|PTKFFVSTPSQPSCK-p;u	PTKFFVSTPSQPSCK-p;u|PPTKFFVSTPSQPSC-p;u|KESESTNSVRLML__-p;u|TLTAQKASEASKVHN-p;u|LNLQPGNSTKESEST-p;u|KISRRPSTEDTHEVD-p;u|NLMRLSQSIPFTPVP-p;u|RTSIPVHSKQAEKIS-p;u|EDTHEVDSKAALIPD-p;u|NTLKRVSSLAGFTDC-p;u	NTLKRVSSLAGFTDC-p;u|KISRRPSTEDTHEVD-p;u|DWLQDRPSNREMPSE-p;u|LNLQPGNSTKESEST-p;u|RTSIPVHSKQAEKIS-p;u|KESESTNSVRLML__-p;u|PPTKFFVSTPSQPSC-p;u|EDTHEVDSKAALIPD-p;u|NLMRLSQSIPFTPVP-p;u|PTKFFVSTPSQPSCK-p;u	EDTHEVDSKAALIPD-p;u|KISRRPSTEDTHEVD-p;u|PTKFFVSTPSQPSCK-p;u|PPTKFFVSTPSQPSC-p;u|KESESTNSVRLML__-p;u|NLMRLSQSIPFTPVP-p;u|NTLKRVSSLAGFTDC-p;u	LNLQPGNSTKESEST-p;u|KISRRPSTEDTHEVD-p;u|KESESTNSVRLML__-p;u|TLTAQKASEASKVHN-p;u|EDTHEVDSKAALIPD-p;u|PPTKFFVSTPSQPSC-p;u|NLMRLSQSIPFTPVP-p;u|NTLKRVSSLAGFTDC-p;u|RTSIPVHSKQAEKIS-p;u	TLTAQKASEASKVHN-p;u|LNLQPGNSTKESEST-p;u|KISRRPSTEDTHEVD-p;u|NTLKRVSSLAGFTDC-p;u|NLMRLSQSIPFTPVP-p;u|EDTHEVDSKAALIPD-p;u|KESESTNSVRLML__-p;u|RTSIPVHSKQAEKIS-p;u|PPTKFFVSTPSQPSC-p;u|PTKFFVSTPSQPSCK-p;u	EDTHEVDSKAALIPD-p;u|TLTAQKASEASKVHN-p;u|KESESTNSVRLML__-p;u|PTKFFVSTPSQPSCK-p;u|PPTKFFVSTPSQPSC-p;u|RTSIPVHSKQAEKIS-p;u|DWLQDRPSNREMPSE-p;u|LNLQPGNSTKESEST-p;u|NTLKRVSSLAGFTDC-p;u|NLMRLSQSIPFTPVP-p;u	PTKFFVSTPSQPSCK-p;u|EDTHEVDSKAALIPD-p;u|NTLKRVSSLAGFTDC-p;u|NLMRLSQSIPFTPVP-p;u|PPTKFFVSTPSQPSC-p;u|KISRRPSTEDTHEVD-p;u	TLTAQKASEASKVHN-p;u|EDTHEVDSKAALIPD-p;u|LNLQPGNSTKESEST-p;u|KESESTNSVRLML__-p;u|KISRRPSTEDTHEVD-p;u|PTKFFVSTPSQPSCK-p;u|NLMRLSQSIPFTPVP-p;u|NTLKRVSSLAGFTDC-p;u|PPTKFFVSTPSQPSC-p;u|RTSIPVHSKQAEKIS-p;u	TLTAQKASEASKVHN-p;u|EDTHEVDSKAALIPD-p;u|PTKFFVSTPSQPSCK-p;u|KESESTNSVRLML__-p;u|PPTKFFVSTPSQPSC-p;u|RTSIPVHSKQAEKIS-p;u|NLMRLSQSIPFTPVP-p;u|NTLKRVSSLAGFTDC-p;u|KISRRPSTEDTHEVD-p;u|LNLQPGNSTKESEST-p;u	TLTAQKASEASKVHN-p;u|EDTHEVDSKAALIPD-p;u|LNLQPGNSTKESEST-p;u|NTLKRVSSLAGFTDC-p;u|PTKFFVSTPSQPSCK-p;u|NLMRLSQSIPFTPVP-p;u|PPTKFFVSTPSQPSC-p;u|RTSIPVHSKQAEKIS-p;u|DWLQDRPSNREMPSE-p;u	PTKFFVSTPSQPSCK-p;u|PPTKFFVSTPSQPSC-p;u|EDTHEVDSKAALIPD-p;u|KISRRPSTEDTHEVD-p;u|RTSIPVHSKQAEKIS-p;u|KESESTNSVRLML__-p;u|NLMRLSQSIPFTPVP-p;u|TLTAQKASEASKVHN-p;u|LNLQPGNSTKESEST-p;u|NTLKRVSSLAGFTDC-p;u
KINASE-PSP_PKCH/PRKCH	n=15|ITGB2_S745|PTPN11_S595|GSK3B_S9|PRKCH_S28|ITGB2_T758|PRKD1_S738|PTPN11_S580|PRKD2_S876|PRKCH_S32|GSTP1_S185|PRKD1_S742|GSTP1_S43|PRKD2_S706|PRKD2_S710|GSK3A_S21	13	38.5	38.5	38.5	38.5	38.5	38.5	38.5	38.5	38.5	38.5	38.5	38.5	38.5	38.5	38.5	38.5	38.5	38.5	38.5	38.5	38.5	38.5	38.5	38.5	38.5	38.5	38.5	38.5	30.8	38.5	38.5	38.5	38.5	38.5	38.5	SGRPRTTSFAESCKP-p;u|GEKSFRRSVVGTPAY-p;u|SGRARTSSFAEPGGG-p;u|QGLAERISVL_____-p;u|VETWQEGSLKASCLY-p;u	GEKSFRRSVVGTPAY-p;u|QGLAERISVL_____-p;u|SGRPRTTSFAESCKP-p;u|VETWQEGSLKASCLY-p;u|SGRARTSSFAEPGGG-p;u	QGLAERISVL_____-p;u|SGRARTSSFAEPGGG-p;u|SGRPRTTSFAESCKP-p;u|GEKSFRRSVVGTPAY-p;u|VETWQEGSLKASCLY-p;u	SGRPRTTSFAESCKP-p;u|SGRARTSSFAEPGGG-p;u|QGLAERISVL_____-p;u|GEKSFRRSVVGTPAY-p;u|VETWQEGSLKASCLY-p;u	SGRARTSSFAEPGGG-p;u|SGRPRTTSFAESCKP-p;u|VETWQEGSLKASCLY-p;u|QGLAERISVL_____-p;u|GEKSFRRSVVGTPAY-p;u	QGLAERISVL_____-p;u|VETWQEGSLKASCLY-p;u|SGRPRTTSFAESCKP-p;u|GEKSFRRSVVGTPAY-p;u|SGRARTSSFAEPGGG-p;u	QGLAERISVL_____-p;u|SGRPRTTSFAESCKP-p;u|SGRARTSSFAEPGGG-p;u|GEKSFRRSVVGTPAY-p;u|VETWQEGSLKASCLY-p;u	SGRARTSSFAEPGGG-p;u|SGRPRTTSFAESCKP-p;u|QGLAERISVL_____-p;u|GEKSFRRSVVGTPAY-p;u|VETWQEGSLKASCLY-p;u	VETWQEGSLKASCLY-p;u|QGLAERISVL_____-p;u|SGRARTSSFAEPGGG-p;u|GEKSFRRSVVGTPAY-p;u|SGRPRTTSFAESCKP-p;u	SGRARTSSFAEPGGG-p;u|SGRPRTTSFAESCKP-p;u|VETWQEGSLKASCLY-p;u|GEKSFRRSVVGTPAY-p;u|QGLAERISVL_____-p;u	QGLAERISVL_____-p;u|SGRPRTTSFAESCKP-p;u|GEKSFRRSVVGTPAY-p;u|SGRARTSSFAEPGGG-p;u|VETWQEGSLKASCLY-p;u	QGLAERISVL_____-p;u|GEKSFRRSVVGTPAY-p;u|SGRPRTTSFAESCKP-p;u|VETWQEGSLKASCLY-p;u|SGRARTSSFAEPGGG-p;u
KINASE-PSP_AurB/AURKB	n=180|RBMX_S326|INCENP_T494|NUMA1_T2055|CDCA5_S33|RACGAP1_S387|NDC80_T49|RBM3_S147|SHCBP1_S634|INCENP_S894|RB1_S780|PRKDC_S511|TP53BP1_S1342|HIST1H2BM_Y84|RUNX3_T14|HIST1H2BH_Y84|CDCA8_T278|DDX3X_S594|INCENP_S899|HIST1H2BD_Y84|KIF2C_S192|INCENP_S72|GFAP_S38|HIST1H2BO_Y84|GFAP_T7|AURKB_S7|HIST2H2BC_S79|DIAPH2_T66|DES_T17|DEK_T67|KRT8_T6|CDCA5_S126|TP53_T284|DIAPH2_S820|MYBBP1A_S1303|CDCA5_T111|ATX…	154	34.4	31.8	31.2	34.4	30.5	31.8	33.1	33.8	33.8	33.1	35.1	34.4	34.4	31.8	34.4	34.4	33.8	31.2	30.5	31.8	33.1	34.4	34.4	31.8	31.8	33.1	33.1	34.4	28.6	33.1	34.4	31.8	34.4	28.6	30.5	KWKDRRKSYTSDLQK-p;u|KFDTRRFSADAARFQ-p;u|DMSYRRISAVEPKTA-p;u|SSRSGRESVSTASDQ-p;u|QETLRRASMQPIQIA-p;u|YTTGRRESVNLGKSE-p;u|GPLRGKTSGTEPADF-p;u|ITVTRRVTAYTVDVT-p;u|PPKLRRRTFSLTEVR-p;u|KQADRRQSMAFSILN-p;u|RRKKRRISYVQDENR-p;u|LRRSQRKSGSELPSI-p;u|SRLQRRQSFAVLRGA-p;u|RSLGLSLSGGDQEDA-p;u|KKNSRRVSFADTIKV-p;u|RRERGRPSLYVQRDI-p;u|SRRPQRKSLYESFVS-p;u|PRRSPRISFFLEKEN-p;u|RSKSSRFSGGFGARD-p;u|YDGERKKTLCGTPNY-p;u…	PVRNRRLTVNEAVKE-p;u|KFDTRRFSADAARFQ-p;u|SRDKLRKSFTPDHVV-p;u|RSLGLSLSGGDQEDA-p;u|ITVTRRVTAYTVDVT-p;u|KRPQRATSNVFAMFD-p;u|KKNSRRVSFADTIKV-p;u|QETLRRASMQPIQIA-p;u|REDYKRLSLGAQKGR-p;u|YTTGRRESVNLGKSE-p;u|DMSYRRISAVEPKTA-p;u|QIKKKRLSELGITQA-p;u|KWKDRRKSYTSDLQK-p;u|RPPPARLSGVMVPAP-p;u|TSTPGRRSCFGFEGL-p;u|GPLRGKTSGTEPADF-p;u|KASNRRPSVYLPTRE-p;u|NGSRKRRSSTVAPAQ-p;u|GYGGSRDSYSSSRSD-p;u|STNRRRLSELLRYHT-p;u…	TSTPGRRSCFGFEGL-p;u|RPPPARLSGVMVPAP-p;u|SESNKRKSNFSNSAD-p;u|ARKKARLSLVIRSPS-p;u|NGSRKRRSSTVAPAQ-p;u|PVRNRRLTVNEAVKE-p;u|PPKLRRRTFSLTEVR-p;u|SGHGSRNSQLGIFSS-p;u|MAFSILNTPKKLGNS-p;u|YTTGRRESVNLGKSE-p;u|EAPTKRKSLVMHTPP-p;u|KASNRRPSVYLPTRE-p;u|VNSVRRKSCLVKEVE-p;u|SSRSGRESVSTASDQ-p;u|WTRSRRKTGTLQPWN-p;u|STRPPTLSPIPHIPR-p;u|ESEDHRASGEVRTGK-p;u|ATKAARKSAPSTGGV-p;u|TSSAVWNSPPLQGAR-p;u|SRRPQRKSLYESFVS-p;u…	SSRSGRESVSTASDQ-p;u|ATKAARKSAPATGGV-p;u|KKNSRRVSFADTIKV-p;u|PPKLRRRTFSLTEVR-p;u|VNSVRRKSCLVKEVE-p;u|RPPPARLSGVMVPAP-p;u|SRRPQRKSLYESFVS-p;u|LRRSQRKSGSELPSI-p;u|ESEDHRASGEVRTGK-p;u|KWKDRRKSYTSDLQK-p;u|KHSKSRDSFLKRVKE-p;u|RRKKRRISYVQDENR-p;u|NGSRKRRSSTVAPAQ-p;u|DMSYRRISAVEPKTA-p;u|YTTGRRESVNLGKSE-p;u|ATKAARKSAPSTGGV-p;u|MAFSILNTPKKLGNS-p;u|KQADRRQSMAFSILN-p;u|ARKKARLSLVIRSPS-p;u|TRSARRRTTQIINIT-p;u…	DMSYRRISAVEPKTA-p;u|KWKDRRKSYTSDLQK-p;u|KFDTRRFSADAARFQ-p;u|YTTGRRESVNLGKSE-p;u|LRRSQRKSGSELPSI-p;u|TSTPGRRSCFGFEGL-p;u|ARKKARLSLVIRSPS-p;u|KKNSRRVSFADTIKV-p;u|ATKAARKSAPSTGGV-p;u|QETLRRASMQPIQIA-p;u|EAPTKRKSLVMHTPP-p;u|PPKLRRRTFSLTEVR-p;u|VNSVRRKSCLVKEVE-p;u|RRKKRRISYVQDENR-p;u|KHSKSRDSFLKRVKE-p;u|SSRSGRESVSTASDQ-p;u|TSSAVWNSPPLQGAR-p;u|REDYKRLSLGAQKGR-p;u|PRRSPRISFFLEKEN-p;u|NGSRKRRSSTVAPAQ-p;u…	KWKDRRKSYTSDLQK-p;u|ESEDHRASGEVRTGK-p;u|DMSYRRISAVEPKTA-p;u|KFDTRRFSADAARFQ-p;u|KHSKSRDSFLKRVKE-p;u|PVRNRRLTVNEAVKE-p;u|KKNSRRVSFADTIKV-p;u|GPLRGKTSGTEPADF-p;u|QETLRRASMQPIQIA-p;u|STRPPTLSPIPHIPR-p;u|SRLQRRQSFAVLRGA-p;u|RSLGLSLSGGDQEDA-p;u|NGSRKRRSSTVAPAQ-p;u|WTRSRRKTGTLQPWN-p;u|ARKKARLSLVIRSPS-p;u|GYGGSRDSYSSSRSD-p;u|SRDKLRKSFTPDHVV-p;u|TSSAVWNSPPLQGAR-p;u|SSRSGRESVSTASDQ-p;u|STNRRRLSELLRYHT-p;u…	SAVRLRSSVPGVRLL-p;u|STNRRRLSELLRYHT-p;u|KKNSRRVSFADTIKV-p;u|VNSVRRKSCLVKEVE-p;u|KHSKSRDSFLKRVKE-p;u|YTTGRRESVNLGKSE-p;u|ESEDHRASGEVRTGK-p;u|PPKLRRRTFSLTEVR-p;u|PTSERKVSLFGKRTS-p;u|LSDYRRLSESQLSFR-p;u|ATKAARKSAPATGGV-p;u|KASNRRPSVYLPTRE-p;u|KQADRRQSMAFSILN-p;u|SSRSGRESVSTASDQ-p;u|TSTPGRRSCFGFEGL-p;u|EAPTKRKSLVMHTPP-p;u|QRRSARLSAKPAPPK-p;u|GYGGSRDSYSSSRSD-p;u|GPLRGKTSGTEPADF-p;u|MAFSILNTPKKLGNS-p;u…	DMSYRRISAVEPKTA-p;u|KWKDRRKSYTSDLQK-p;u|STNRRRLSELLRYHT-p;u|KHSKSRDSFLKRVKE-p;u|KFDTRRFSADAARFQ-p;u|ITVTRRVTAYTVDVT-p;u|ESEDHRASGEVRTGK-p;u|PVRNRRLTVNEAVKE-p;u|RRKKRRISYVQDENR-p;u|LSDYRRLSESQLSFR-p;u|YTTGRRESVNLGKSE-p;u|KKNSRRVSFADTIKV-p;u|RRERGRPSLYVQRDI-p;u|SRRPQRKSLYESFVS-p;u|EAPTKRKSLVMHTPP-p;u|KQADRRQSMAFSILN-p;u|RSLGLSLSGGDQEDA-p;u|SGHGSRNSQLGIFSS-p;u|VNKVRRVSFADPIYQ-p;u|SRLQRRQSFAVLRGA-p;u…	ESEDHRASGEVRTGK-p;u|ARKKARLSLVIRSPS-p;u|KASNRRPSVYLPTRE-p;u|KFDTRRFSADAARFQ-p;u|NGSRKRRSSTVAPAQ-p;u|QGGYDRYSGGNYRDN-p;u|MAFSILNTPKKLGNS-p;u|QETLRRASMQPIQIA-p;u|RRKKRRISYVQDENR-p;u|KHSKSRDSFLKRVKE-p;u|RRERGRPSLYVQRDI-p;u|TRSARRRTTQIINIT-p;u|KWKDRRKSYTSDLQK-p;u|YNISGNGSPLADSKE-p;u|RPPPARLSGVMVPAP-p;u|STNRRRLSELLRYHT-p;u|DMSYRRISAVEPKTA-p;u|LRRSQRKSGSELPSI-p;u|RSLGLSLSGGDQEDA-p;u|SGHGSRNSQLGIFSS-p;u…	ESEDHRASGEVRTGK-p;u|PVRNRRLTVNEAVKE-p;u|KHSKSRDSFLKRVKE-p;u|KFDTRRFSADAARFQ-p;u|GYGGSRDSYSSSRSD-p;u|KKNSRRVSFADTIKV-p;u|TSTPGRRSCFGFEGL-p;u|DMSYRRISAVEPKTA-p;u|RSLGLSLSGGDQEDA-p;u|VNKVRRVSFADPIYQ-p;u|KWKDRRKSYTSDLQK-p;u|NGSRKRRSSTVAPAQ-p;u|REDYKRLSLGAQKGR-p;u|STNRRRLSELLRYHT-p;u|KQADRRQSMAFSILN-p;u|LSDYRRLSESQLSFR-p;u|KASNRRPSVYLPTRE-p;u|GPLRGKTSGTEPADF-p;u|PPKLRRRTFSLTEVR-p;u|SRRPQRKSLYESFVS-p;u…	KFDTRRFSADAARFQ-p;u|ESEDHRASGEVRTGK-p;u|RSLGLSLSGGDQEDA-p;u|RRERGRPSLYVQRDI-p;u|QETLRRASMQPIQIA-p;u|ARKKARLSLVIRSPS-p;u|TRSARRRTTQIINIT-p;u|PVRNRRLTVNEAVKE-p;u|KHSKSRDSFLKRVKE-p;u|GYGGSRDSYSSSRSD-p;u|KQADRRQSMAFSILN-p;u|NGSRKRRSSTVAPAQ-p;u|RRKKRRISYVQDENR-p;u|LSDYRRLSESQLSFR-p;u|KRPQRATSNVFAMFD-p;u|KASNRRPSVYLPTRE-p;u|EAPTKRKSLVMHTPP-p;u|VNSVRRKSCLVKEVE-p;u|PKIEDVGSDEEDDSG-p;u|SRRPQRKSLYESFVS-p;u…	DMSYRRISAVEPKTA-p;u|KWKDRRKSYTSDLQK-p;u|SRLQRRQSFAVLRGA-p;u|KRPQRATSNVFAMFD-p;u|REDYKRLSLGAQKGR-p;u|LSDYRRLSESQLSFR-p;u|QGGYDRYSGGNYRDN-p;u|ATKAARKSAPSTGGV-p;u|RRERGRPSLYVQRDI-p;u|QETLRRASMQPIQIA-p;u|KKNSRRVSFADTIKV-p;u|ITVTRRVTAYTVDVT-p;u|LRRSQRKSGSELPSI-p;u|GPLRGKTSGTEPADF-p;u|TRSARRRTTQIINIT-p;u|PRRSPRISFFLEKEN-p;u|PVRNRRLTVNEAVKE-p;u|ATKAARKSAPATGGV-p;u|VNSVRRKSCLVKEVE-p;u|ARKKARLSLVIRSPS-p;u…
KINASE-PSP_CAMK4	n=8|HDAC5_S498|CREB1_S133|HNRNPL_S544|PHB2_S91|CAMK2A_S332|RELA_S536|HDAC5_S259|STMN1_S16	8	37.5	50	50	37.5	50	50	50	37.5	50	50	25	25	37.5	62.5	50	37.5	50	62.5	50	50	50	50	25	62.5	50	50	50	37.5	50	50	50	62.5	37.5	50	50	FPLRKTASEPNLKVR-p;u|RPLSRTQSSPLPQSP-p;u|KELEKRASGQAFELI-p;u	FPLRKTASEPNLKVR-p;u|RARPRKISSPTGSKD-p;u|RPLSRTQSSPLPQSP-p;u|KELEKRASGQAFELI-p;u	FPLRKTASEPNLKVR-p;u|RARPRKISSPTGSKD-p;u|RPLSRTQSSPLPQSP-p;u|KELEKRASGQAFELI-p;u	FPLRKTASEPNLKVR-p;u|RPLSRTQSSPLPQSP-p;u|KELEKRASGQAFELI-p;u	GKSERSSSGLLEWES-p;u|FPLRKTASEPNLKVR-p;u|RPLSRTQSSPLPQSP-p;u|KELEKRASGQAFELI-p;u	FPLRKTASEPNLKVR-p;u|RARPRKISSPTGSKD-p;u|RPLSRTQSSPLPQSP-p;u|KELEKRASGQAFELI-p;u	FPLRKTASEPNLKVR-p;u|RARPRKISSPTGSKD-p;u|RPLSRTQSSPLPQSP-p;u|KELEKRASGQAFELI-p;u	FPLRKTASEPNLKVR-p;u|RPLSRTQSSPLPQSP-p;u|KELEKRASGQAFELI-p;u	GKSERSSSGLLEWES-p;u|FPLRKTASEPNLKVR-p;u|RPLSRTQSSPLPQSP-p;u|KELEKRASGQAFELI-p;u	FPLRKTASEPNLKVR-p;u|RARPRKISSPTGSKD-p;u|RPLSRTQSSPLPQSP-p;u|KELEKRASGQAFELI-p;u	FPLRKTASEPNLKVR-p;u|KELEKRASGQAFELI-p;u	FPLRKTASEPNLKVR-p;u|KELEKRASGQAFELI-p;u
KINASE-PSP_AurA/AURKA	n=99|CRMP1_T101|WDR62_S49|FAF1_S291|WDR62_T50|AURKA_S67|AURKA_T287|ARPC1B_T21|NUMA1_S1887|MCRS1_S36|DCTN1_S19|RUNX3_T14|YAP1_S397|AURKA_Y148|AURKA_S266|FAF1_S289|AURKA_S278|BRCA1_S308|SKI_S383|CRMP1_T102|MYBBP1A_S1303|GSK3B_S9|PHLDA1_S95|CENPJ_S467|CETN2_S170|NUMA1_T1811|VHL_S72|LIMK2_T494|PARD3_S962|NEDD1_S405|AURKA_S226|PLK1_T210|ESR1_S167|DLGAP5_S627|AURKA_T16|FADD_S203|LATS2_S83|SKI_S326|TP73…	99	24.2	18.2	23.2	22.2	19.2	18.2	23.2	22.2	22.2	19.2	24.2	21.2	22.2	24.2	25.3	22.2	22.2	21.2	19.2	19.2	23.2	25.3	21.2	24.2	18.2	23.2	19.2	24.2	18.2	23.2	25.3	24.2	24.2	19.2	19.2	RRRTRLSTASEETVQ-p;u|LRRRTRLSTASEETV-p;u|SSRSGRESVSTASDQ-p;u|SGRPRTTSFAESCKP-p;u|QRRSLRLSAQKDLEQ-p;u|RQQRKRVSLEPHQGP-p;u|QETLRRASMQPIQIA-p;u|LSAFRPWSPAVSASE-p;u|PAQPQRRSLRLSAQK-p;u|KQADRRQSMAFSILN-p;u|RQRVRYDSSNQVKGK-p;u|ATLARRDSLQKPGLE-p;u|YDGERKKTLCGTPNY-p;u|SGHGSRNSQLGIFSS-p;u|PTSERKVSLFGKRTS-p;u|VQNKRRRSVTPPEEQ-p;u|TRSARRRTTQIINIT-p;u|ESALRKQSLYLKFDP-p;u|CLSSERMSLPLLAGG-p;u|ARKKARLSLVIRSPS-p;u…	ATLARRDSLQKPGLE-p;u|QETLRRASMQPIQIA-p;u|SGRPRTTSFAESCKP-p;u|RQQRKRVSLEPHQGP-p;u|VQNKRRRSVTPPEEQ-p;u|LRRRTRLSTASEETV-p;u|SGHGSRNSQLGIFSS-p;u|LPNNTSSSPQPKKKP-p;u|TSVRRRTSFYLPKDA-p;u|GTSVRRRTSFYLPKD-p;u|QRRSLRLSAQKDLEQ-p;u|YDGERKKTLCGTPNY-p;u|LKCSNRKSLSPSGLK-p;u|CLSSERMSLPLLAGG-p;u|PAQPQRRSLRLSAQK-p;u|ARKKARLSLVIRSPS-p;u|RQRVRYDSSNQVKGK-p;u|SSRSGRESVSTASDQ-p;u	ARKKARLSLVIRSPS-p;u|ESALRKQSLYLKFDP-p;u|SGHGSRNSQLGIFSS-p;u|SGRPRTTSFAESCKP-p;u|SSRSGRESVSTASDQ-p;u|RQQRKRVSLEPHQGP-p;u|KQADRRQSMAFSILN-p;u|CLSSERMSLPLLAGG-p;u|VQNKRRRSVTPPEEQ-p;u|RRRTRLSTASEETVQ-p;u|QRRSLRLSAQKDLEQ-p;u|QETLRRASMQPIQIA-p;u|LRRRTRLSTASEETV-p;u|PAQPQRRSLRLSAQK-p;u|RQRVRYDSSNQVKGK-p;u|YDGERKKTLCGTPNY-p;u|QEHARHISFGGNLIT-p;u|LPNNTSSSPQPKKKP-p;u|PTSERKVSLFGKRTS-p;u|LKCSNRKSLSPSGLK-p;u…	SGRPRTTSFAESCKP-p;u|SSRSGRESVSTASDQ-p;u|LRRRTRLSTASEETV-p;u|RRRTRLSTASEETVQ-p;u|LSAFRPWSPAVSASE-p;u|RQRVRYDSSNQVKGK-p;u|KQADRRQSMAFSILN-p;u|ARKKARLSLVIRSPS-p;u|TRSARRRTTQIINIT-p;u|SGHGSRNSQLGIFSS-p;u|QETLRRASMQPIQIA-p;u|RQQRKRVSLEPHQGP-p;u|VQNKRRRSVTPPEEQ-p;u|CLSSERMSLPLLAGG-p;u|QRRSLRLSAQKDLEQ-p;u|YDGERKKTLCGTPNY-p;u|PTSERKVSLFGKRTS-p;u|PAQPQRRSLRLSAQK-p;u|ATLARRDSLQKPGLE-p;u|TSVRRRTSFYLPKDA-p;u…	QRRSLRLSAQKDLEQ-p;u|TRSSARRSQAGVSSG-p;u|ARKKARLSLVIRSPS-p;u|PAQPQRRSLRLSAQK-p;u|RQQRKRVSLEPHQGP-p;u|QETLRRASMQPIQIA-p;u|SGRPRTTSFAESCKP-p;u|LRRRTRLSTASEETV-p;u|ATLARRDSLQKPGLE-p;u|SSRSGRESVSTASDQ-p;u|CLSSERMSLPLLAGG-p;u|RQRVRYDSSNQVKGK-p;u|RRRTRLSTASEETVQ-p;u|SGHGSRNSQLGIFSS-p;u|VQNKRRRSVTPPEEQ-p;u|YDGERKKTLCGTPNY-p;u|LPNNTSSSPQPKKKP-p;u|GTSVRRRTSFYLPKD-p;u|TSVRRRTSFYLPKDA-p;u	LPNNTSSSPQPKKKP-p;u|SGRPRTTSFAESCKP-p;u|QETLRRASMQPIQIA-p;u|QRRSLRLSAQKDLEQ-p;u|ARKKARLSLVIRSPS-p;u|SSRSGRESVSTASDQ-p;u|VQNKRRRSVTPPEEQ-p;u|LKCSNRKSLSPSGLK-p;u|PAQPQRRSLRLSAQK-p;u|ATLARRDSLQKPGLE-p;u|RQRVRYDSSNQVKGK-p;u|SGHGSRNSQLGIFSS-p;u|CLSSERMSLPLLAGG-p;u|RQQRKRVSLEPHQGP-p;u|LRRRTRLSTASEETV-p;u|YDGERKKTLCGTPNY-p;u|GTSVRRRTSFYLPKD-p;u|TSVRRRTSFYLPKDA-p;u	ESALRKQSLYLKFDP-p;u|PTSERKVSLFGKRTS-p;u|KQADRRQSMAFSILN-p;u|SSRSGRESVSTASDQ-p;u|RRRTRLSTASEETVQ-p;u|LRRRTRLSTASEETV-p;u|YDGERKKTLCGTPNY-p;u|QETLRRASMQPIQIA-p;u|VQNKRRRSVTPPEEQ-p;u|QEHARHISFGGNLIT-p;u|QRRSLRLSAQKDLEQ-p;u|SGHGSRNSQLGIFSS-p;u|RQRVRYDSSNQVKGK-p;u|ARKKARLSLVIRSPS-p;u|PAQPQRRSLRLSAQK-p;u|SGRPRTTSFAESCKP-p;u|GTSVRRRTSFYLPKD-p;u|RQQRKRVSLEPHQGP-p;u|TSVRRRTSFYLPKDA-p;u|CLSSERMSLPLLAGG-p;u…	KQADRRQSMAFSILN-p;u|SGHGSRNSQLGIFSS-p;u|PTSERKVSLFGKRTS-p;u|SGRPRTTSFAESCKP-p;u|QETLRRASMQPIQIA-p;u|SSRSGRESVSTASDQ-p;u|ARKKARLSLVIRSPS-p;u|RQQRKRVSLEPHQGP-p;u|TRSARRRTTQIINIT-p;u|VQNKRRRSVTPPEEQ-p;u|ATLARRDSLQKPGLE-p;u|LRRRTRLSTASEETV-p;u|QRRSLRLSAQKDLEQ-p;u|RQRVRYDSSNQVKGK-p;u|RRRTRLSTASEETVQ-p;u|LSAFRPWSPAVSASE-p;u|PAQPQRRSLRLSAQK-p;u|YDGERKKTLCGTPNY-p;u|GTSVRRRTSFYLPKD-p;u|TSVRRRTSFYLPKDA-p;u…	LSAFRPWSPAVSASE-p;u|RQRVRYDSSNQVKGK-p;u|ARKKARLSLVIRSPS-p;u|LRRRTRLSTASEETV-p;u|RRRTRLSTASEETVQ-p;u|QETLRRASMQPIQIA-p;u|RQQRKRVSLEPHQGP-p;u|TRSARRRTTQIINIT-p;u|SGHGSRNSQLGIFSS-p;u|TRSSARRSQAGVSSG-p;u|CLSSERMSLPLLAGG-p;u|QRRSLRLSAQKDLEQ-p;u|VQNKRRRSVTPPEEQ-p;u|SSRSGRESVSTASDQ-p;u|ATLARRDSLQKPGLE-p;u|PAQPQRRSLRLSAQK-p;u|GTSVRRRTSFYLPKD-p;u|SGRPRTTSFAESCKP-p;u|YDGERKKTLCGTPNY-p;u|TSVRRRTSFYLPKDA-p;u…	SGRPRTTSFAESCKP-p;u|RQRVRYDSSNQVKGK-p;u|KQADRRQSMAFSILN-p;u|QETLRRASMQPIQIA-p;u|VQNKRRRSVTPPEEQ-p;u|LPNNTSSSPQPKKKP-p;u|LKCSNRKSLSPSGLK-p;u|SGHGSRNSQLGIFSS-p;u|RQQRKRVSLEPHQGP-p;u|LRRRTRLSTASEETV-p;u|SSRSGRESVSTASDQ-p;u|ATLARRDSLQKPGLE-p;u|YDGERKKTLCGTPNY-p;u|ARKKARLSLVIRSPS-p;u|CLSSERMSLPLLAGG-p;u|QRRSLRLSAQKDLEQ-p;u|GTSVRRRTSFYLPKD-p;u|PAQPQRRSLRLSAQK-p;u|TSVRRRTSFYLPKDA-p;u	QETLRRASMQPIQIA-p;u|ARKKARLSLVIRSPS-p;u|TRSARRRTTQIINIT-p;u|KQADRRQSMAFSILN-p;u|RQRVRYDSSNQVKGK-p;u|SGRPRTTSFAESCKP-p;u|LRRRTRLSTASEETV-p;u|RRRTRLSTASEETVQ-p;u|VQNKRRRSVTPPEEQ-p;u|LSAFRPWSPAVSASE-p;u|RQQRKRVSLEPHQGP-p;u|ESALRKQSLYLKFDP-p;u|SGHGSRNSQLGIFSS-p;u|CLSSERMSLPLLAGG-p;u|QEHARHISFGGNLIT-p;u|SSRSGRESVSTASDQ-p;u|QRRSLRLSAQKDLEQ-p;u|YDGERKKTLCGTPNY-p;u|PAQPQRRSLRLSAQK-p;u|TSVRRRTSFYLPKDA-p;u…	LPNNTSSSPQPKKKP-p;u|SGRPRTTSFAESCKP-p;u|RRRTRLSTASEETVQ-p;u|ATLARRDSLQKPGLE-p;u|QETLRRASMQPIQIA-p;u|LRRRTRLSTASEETV-p;u|TRSARRRTTQIINIT-p;u|ARKKARLSLVIRSPS-p;u|RQQRKRVSLEPHQGP-p;u|PTSERKVSLFGKRTS-p;u|PAQPQRRSLRLSAQK-p;u|YDGERKKTLCGTPNY-p;u|TSVRRRTSFYLPKDA-p;u|GTSVRRRTSFYLPKD-p;u|RQRVRYDSSNQVKGK-p;u|CLSSERMSLPLLAGG-p;u|VQNKRRRSVTPPEEQ-p;u|QRRSLRLSAQKDLEQ-p;u|LSAFRPWSPAVSASE-p;u|SGHGSRNSQLGIFSS-p;u…
KINASE-PSP_P38A/MAPK14	n=175|PXN_S85|AIMP2_S156|MEF2A_S192|NR3C1_S203|SLC9A1_S726|MEF2A_S98|ATF2_T69|DROSHA_S255|STAT1_S727|FOXC2_S367|DDIT3_S79|SREBF1_S39|NCF1_S348|CDKN1A_S130|ATF2_T71|TAB1_S423|KARS_T52|JDP2_T148|PIP4K2B_S326|ADAM17_T735|SLC9A1_S723|HSPB1_S176|ESR1_S118|SHC1_S54|NOXA1_S239|ETV6_S257|FPR1_S342|MKL1_S333|PPARGC1A_T263|NCF1_S345|GSK3B_T390|_S436|MKNK1_T255|SHC1_T386|ESR1_S294|SLC9A1_S729|DROSHA_S221|NC…	170	22.4	22.9	22.9	24.1	23.5	22.9	23.5	21.8	23.5	22.9	22.4	22.9	24.1	24.1	22.9	24.1	23.5	23.5	23.5	24.1	23.5	22.9	22.9	24.1	22.9	23.5	22.9	22.4	21.8	23.5	22.9	24.1	22.4	23.5	23.5	VLSRQITSPVSGING-p;u|SNLGHPESPPRKRLK-p;u|SSVDTLLSPTALIDS-p;u|RSINKLDSPDPFKLN-p;u|IDQGDLMTPQFTPYY-p;u|TPLLSSLSATSNNST-p;u|RELVEPLTPSGEAPN-p;u|HQQPQSSSPVYGSSA-p;u|NTIDLPMSPRTLDSL-p;u|KPFPAPQTPGRLQPA-p;u|TKGSGLGSPTSSFNS-p;u|VRTDSVKTPESEGNP-p;u|SVIVADQTPTPTRFL-p;u|SPVSVGSSPPVKNIS-p;u|IVADQTPTPTRFLKN-p;u|TDNLLPMSPEEFDEV-p;u|DLEFSSGSPGKETNE-p;u|DPRGDFHSPIVLGRP-p;u|EPPSPPQSPRVEEAS-p;u|_MAEAPASPAPLSPL-p;u…	RELVEPLTPSGEAPN-p;u|TPLLSSLSATSNNST-p;u|LLSSLSATSNNSTVA-p;u|VRTDSVKTPESEGNP-p;u|NRAVSLDSPVSVGSS-p;u|TEMDPTYSPAALPQS-p;u|RSINKLDSPDPFKLN-p;u|KPFPAPQTPGRLQPA-p;u|NTIDLPMSPRTLDSL-p;u|TDNLLPMSPEEFDEV-p;u|RVKEEPPSPPQSPRV-p;u|RIQAAASTPTNATAA-p;u|SGEQAEGSPGGPGDS-p;u|TKGSGLGSPTSSFNS-p;u|EPPSPPQSPRVEEAS-p;u|QLSKWPGSPTSRSSD-p;u|SVIVADQTPTPTRFL-p;u|IVADQTPTPTRFLKN-p;u|SSVDTLLSPTALIDS-p;u|PGAGSLGSPASQRKD-p;u…	VLSRQITSPVSGING-p;u|IDQGDLMTPQFTPYY-p;u|ISYTPPESPVPSYAS-p;u|SNLGHPESPPRKRLK-p;u|PASPAPLSPLEVELD-p;u|RIQAAASTPTNATAA-p;u|SSVDTLLSPTALIDS-p;u|_MAEAPASPAPLSPL-p;u|KEHRGCDSPDPDTSY-p;u|PGAGSLGSPASQRKD-p;u|VEVVSPATPVPSETA-p;u|PDTSYVLTPHTEEKY-p;u|IVADQTPTPTRFLKN-p;u|RSINKLDSPDPFKLN-p;u|NNSSRPSTPTINVLE-p;u|VRTDSVKTPESEGNP-p;u|DPRGDFHSPIVLGRP-p;u|EPPSPPQSPRVEEAS-p;u|TDNLLPMSPEEFDEV-p;u|TKGSGLGSPTSSFNS-p;u…	RSINKLDSPDPFKLN-p;u|TEMDPTYSPAALPQS-p;u|TDNLLPMSPEEFDEV-p;u|IDQGDLMTPQFTPYY-p;u|VRTDSVKTPESEGNP-p;u|KPFPAPQTPGRLQPA-p;u|NRAVSLDSPVSVGSS-p;u|PDTSYVLTPHTEEKY-p;u|SSVDTLLSPTALIDS-p;u|SNLGHPESPPRKRLK-p;u|NTIDLPMSPRTLDSL-p;u|KKKRLVQSPNSYFMD-p;u|SGEQAEGSPGGPGDS-p;u|VEVVSPATPVPSETA-p;u|VLSRQITSPVSGING-p;u|ISYTPPESPVPSYAS-p;u|RELVEPLTPSGEAPN-p;u|SVIVADQTPTPTRFL-p;u|DPRGDFHSPIVLGRP-p;u|TPLLSSLSATSNNST-p;u…	RSINKLDSPDPFKLN-p;u|TEMDPTYSPAALPQS-p;u|NRAVSLDSPVSVGSS-p;u|TPLLSSLSATSNNST-p;u|RELVEPLTPSGEAPN-p;u|KPFPAPQTPGRLQPA-p;u|VLSRQITSPVSGING-p;u|IDQGDLMTPQFTPYY-p;u|RIQAAASTPTNATAA-p;u|PDTSYVLTPHTEEKY-p;u|HQQPQSSSPVYGSSA-p;u|VRTDSVKTPESEGNP-p;u|SVIVADQTPTPTRFL-p;u|IVADQTPTPTRFLKN-p;u|VEVVSPATPVPSETA-p;u|SSVDTLLSPTALIDS-p;u|EPPSPPQSPRVEEAS-p;u|NTIDLPMSPRTLDSL-p;u|ISYTPPESPVPSYAS-p;u|_MAEAPASPAPLSPL-p;u…	VLSRQITSPVSGING-p;u|NRAVSLDSPVSVGSS-p;u|RSINKLDSPDPFKLN-p;u|TEMDPTYSPAALPQS-p;u|QLSKWPGSPTSRSSD-p;u|SSVDTLLSPTALIDS-p;u|PDTSYVLTPHTEEKY-p;u|KPFPAPQTPGRLQPA-p;u|TPLLSSLSATSNNST-p;u|AVIPINGSPRTPRRG-p;u|IDQGDLMTPQFTPYY-p;u|EPICSVNTPREVTLH-p;u|TKGSGLGSPTSSFNS-p;u|NTIDLPMSPRTLDSL-p;u|VRTDSVKTPESEGNP-p;u|SVIVADQTPTPTRFL-p;u|IVADQTPTPTRFLKN-p;u|ISYTPPESPVPSYAS-p;u|EPPSPPQSPRVEEAS-p;u|TDNLLPMSPEEFDEV-p;u…	QSTKVPQTPLHTSRV-p;u|PDTSYVLTPHTEEKY-p;u|SIKSEPISPPRDRMT-p;u|KPFPAPQTPGRLQPA-p;u|IDQGDLMTPQFTPYY-p;u|PNTEDRESPSVKRMR-p;u|RSINKLDSPDPFKLN-p;u|MPKLATQSNEITIPV-p;u|PASPAPLSPLEVELD-p;u|DPRGDFHSPIVLGRP-p;u|SNLGHPESPPRKRLK-p;u|RELVEPLTPSGEAPN-p;u|SVIVADQTPTPTRFL-p;u|TPLLSSLSATSNNST-p;u|KEHRGCDSPDPDTSY-p;u|VEVVSPATPVPSETA-p;u|_MAEAPASPAPLSPL-p;u|VLSRQITSPVSGING-p;u|IVADQTPTPTRFLKN-p;u|RIQAAASTPTNATAA-p;u…	KKKRLVQSPNSYFMD-p;u|RSINKLDSPDPFKLN-p;u|IDQGDLMTPQFTPYY-p;u|VLSRQITSPVSGING-p;u|KPFPAPQTPGRLQPA-p;u|PASPAPLSPLEVELD-p;u|_MAEAPASPAPLSPL-p;u|MPKLATQSNEITIPV-p;u|TPLLSSLSATSNNST-p;u|SSVDTLLSPTALIDS-p;u|PGAGSLGSPASQRKD-p;u|EPPSPPQSPRVEEAS-p;u|RELVEPLTPSGEAPN-p;u|HQQPQSSSPVYGSSA-p;u|SVIVADQTPTPTRFL-p;u|RVKEEPPSPPQSPRV-p;u|PDTSYVLTPHTEEKY-p;u|DPRGDFHSPIVLGRP-p;u|NTIDLPMSPRTLDSL-p;u|SPVSVGSSPPVKNIS-p;u…	PDTSYVLTPHTEEKY-p;u|RSINKLDSPDPFKLN-p;u|RELVEPLTPSGEAPN-p;u|SIKSEPISPPRDRMT-p;u|TPLLSSLSATSNNST-p;u|MPKLATQSNEITIPV-p;u|IDQGDLMTPQFTPYY-p;u|KEHRGCDSPDPDTSY-p;u|PGAGSLGSPASQRKD-p;u|TEMDPTYSPAALPQS-p;u|PASPAPLSPLEVELD-p;u|PNTEDRESPSVKRMR-p;u|RVKEEPPSPPQSPRV-p;u|NRAVSLDSPVSVGSS-p;u|DPRGDFHSPIVLGRP-p;u|EPPSPPQSPRVEEAS-p;u|_MAEAPASPAPLSPL-p;u|VEVVSPATPVPSETA-p;u|RIQAAASTPTNATAA-p;u|KKKRLVQSPNSYFMD-p;u…	VRTDSVKTPESEGNP-p;u|MPKLATQSNEITIPV-p;u|RSINKLDSPDPFKLN-p;u|PDTSYVLTPHTEEKY-p;u|IDQGDLMTPQFTPYY-p;u|VLSRQITSPVSGING-p;u|VEVVSPATPVPSETA-p;u|RELVEPLTPSGEAPN-p;u|RVKEEPPSPPQSPRV-p;u|KPFPAPQTPGRLQPA-p;u|SVIVADQTPTPTRFL-p;u|KKKRLVQSPNSYFMD-p;u|TDNLLPMSPEEFDEV-p;u|RIQAAASTPTNATAA-p;u|NTIDLPMSPRTLDSL-p;u|TPLLSSLSATSNNST-p;u|PGAGSLGSPASQRKD-p;u|IVADQTPTPTRFLKN-p;u|ISYTPPESPVPSYAS-p;u|PASPAPLSPLEVELD-p;u…	RSINKLDSPDPFKLN-p;u|VRTDSVKTPESEGNP-p;u|IDQGDLMTPQFTPYY-p;u|HQQPQSSSPVYGSSA-p;u|DLEFSSGSPGKETNE-p;u|PDTSYVLTPHTEEKY-p;u|VLSRQITSPVSGING-p;u|KKKRLVQSPNSYFMD-p;u|KSDGACDSPSSDKEN-p;u|RELVEPLTPSGEAPN-p;u|TDNLLPMSPEEFDEV-p;u|KEHRGCDSPDPDTSY-p;u|IVADQTPTPTRFLKN-p;u|MPKLATQSNEITIPV-p;u|SVIVADQTPTPTRFL-p;u|_MAEAPASPAPLSPL-p;u|KPFPAPQTPGRLQPA-p;u|SSVDTLLSPTALIDS-p;u|PASPAPLSPLEVELD-p;u|ISYTPPESPVPSYAS-p;u…	KPFPAPQTPGRLQPA-p;u|RSINKLDSPDPFKLN-p;u|HQQPQSSSPVYGSSA-p;u|TEMDPTYSPAALPQS-p;u|IDQGDLMTPQFTPYY-p;u|SNLGHPESPPRKRLK-p;u|SYGTPPDSPGNLLSF-p;u|QLSKWPGSPTSRSSD-p;u|NRAVSLDSPVSVGSS-p;u|TKGSGLGSPTSSFNS-p;u|PDTSYVLTPHTEEKY-p;u|SVIVADQTPTPTRFL-p;u|IVADQTPTPTRFLKN-p;u|NNSSRPSTPTINVLE-p;u|KKKRLVQSPNSYFMD-p;u|KEHRGCDSPDPDTSY-p;u|TPLLSSLSATSNNST-p;u|PNTEDRESPSVKRMR-p;u|VLSRQITSPVSGING-p;u|RELVEPLTPSGEAPN-p;u…
KINASE-PSP_p90RSK/RPS6KA1	n=59|UBR5_S2483|MAPK7_S496|BAD_S75|SLC9A1_S703|WWC1_S947|NDRG2_S350|RPTOR_S719|VASP_T278|CREB1_S133|ARHGAP31_S1106|GSK3B_S9|NDRG2_S332|RANBP3_S126|CDC25B_T355|CDC25C_S247|DEPTOR_S287|UBR5_T637|TSC2_S1798|RPTOR_S721|EEF2K_S366|ESR1_S167|CARHSP1_S52|SLC9A3R1_T156|MXD1_S145|RPS6_S236|YBX1_S102|CHEK1_S280|MITF_S409|DEPTOR_S286|FLNA_S2152|CCT2_S260|PDCD4_S457|SOS1_S1134|LCP1_S5|APAF1_S357|SOS1_S1161|U…	59	49.2	49.2	45.8	47.5	47.5	49.2	47.5	47.5	49.2	47.5	49.2	49.2	47.5	45.8	49.2	47.5	49.2	45.8	47.5	45.8	47.5	49.2	49.2	45.8	49.2	47.5	47.5	49.2	40.7	47.5	49.2	45.8	49.2	45.8	47.5	AKRPRVTSGGVSESP-p;u|___MARGSVSDEEMM-p;u|MSRARIGSDPLAYEP-p;u|RGRKRFVSEGDGGRL-p;u|PPRRRPESAPAESSP-p;u|PHGPRSASVSSISLT-p;u|GSRVRVDSTAKVAEI-p;u|NPRKYLRSVGDGETV-p;u|SGRPRTTSFAESCKP-p;u|TRRTRTFSATVRASQ-p;u|RDSGRGDSVSDSGSD-p;u|TRRRRAPSVANVGSH-p;u|SPQVRTLSGSRPPLL-p;u|QALSRKASAVNMEKF-p;u|IAKRRRLSSLRASTS-p;u|AKRRRLSSLRASTSK-p;u|EIRSRHSSYPAGTED-p;u|PYKRRRSTPAPKEEE-p;u|RERSRTGSESSQTGT-p;u|CRLNRSDSDSSTLSK-p;u…	QALSRKASAVNMEKF-p;u|CRLNRSDSDSSTLSK-p;u|TRRRRAPSVANVGSH-p;u|LSRSRTASLTSAASV-p;u|SGRPRTTSFAESCKP-p;u|PPRRRPESAPAESSP-p;u|PHGPRSASVSSISLT-p;u|EIRSRHSSYPAGTED-p;u|AAAHRKGSSSNEPSS-p;u|PYKRRRSTPAPKEEE-p;u|VKRERTSSLTQFPPS-p;u|VQNKRRRSVTPPEEQ-p;u|GSRVRVDSTAKVAEI-p;u|RGRKRFVSEGDGGRL-p;u|CGSSGYFSSSPTLSS-p;u|PRLRSVSSYGNIRAV-p;u|RDSGRGDSVSDSGSD-p;u|RVSIRLPSTSGSEGV-p;u|MSRARIGSDPLAYEP-p;u|AKRPRVTSGGVSESP-p;u…	LSRSRTASLTSAASV-p;u|PRLRSVSSYGNIRAV-p;u|GQRKRLISSVEDFTE-p;u|PYKRRRSTPAPKEEE-p;u|CGSSGYFSSSPTLSS-p;u|VKRERTSSLTQFPPS-p;u|RERSRTGSESSQTGT-p;u|EIRSRHSSYPAGTED-p;u|TRRTRTFSATVRASQ-p;u|RDSGRGDSVSDSGSD-p;u|GSRVRVDSTAKVAEI-p;u|SGRPRTTSFAESCKP-p;u|AAAHRKGSSSNEPSS-p;u|PPRRRPESAPAESSP-p;u|RGRKRFVSEGDGGRL-p;u|VQNKRRRSVTPPEEQ-p;u|CRLNRSDSDSSTLSK-p;u|NPRKYLRSVGDGETV-p;u|PHGPRSASVSSISLT-p;u|AKRPRVTSGGVSESP-p;u…	RGRKRFVSEGDGGRL-p;u|MSRARIGSDPLAYEP-p;u|RDSGRGDSVSDSGSD-p;u|PHGPRSASVSSISLT-p;u|AKRPRVTSGGVSESP-p;u|GSRVRVDSTAKVAEI-p;u|SGRPRTTSFAESCKP-p;u|EIRSRHSSYPAGTED-p;u|LSRSRTASLTSAASV-p;u|PPRRRPESAPAESSP-p;u|RERSRTGSESSQTGT-p;u|TRRTRTFSATVRASQ-p;u|VKRERTSSLTQFPPS-p;u|CRLNRSDSDSSTLSK-p;u|IAKRRRLSSLRASTS-p;u|AAAHRKGSSSNEPSS-p;u|TPRLRSVSSYGNIRA-p;u|VQNKRRRSVTPPEEQ-p;u|GQRKRLISSVEDFTE-p;u|RVSIRLPSTSGSEGV-p;u…	RGRKRFVSEGDGGRL-p;u|RDSGRGDSVSDSGSD-p;u|CRLNRSDSDSSTLSK-p;u|MSRARIGSDPLAYEP-p;u|GSRVRVDSTAKVAEI-p;u|PHGPRSASVSSISLT-p;u|PPRRRPESAPAESSP-p;u|SGRPRTTSFAESCKP-p;u|AAAHRKGSSSNEPSS-p;u|GQRKRLISSVEDFTE-p;u|PYKRRRSTPAPKEEE-p;u|EIRSRHSSYPAGTED-p;u|TRRTRTFSATVRASQ-p;u|RERSRTGSESSQTGT-p;u|VKRERTSSLTQFPPS-p;u|LSRSRTASLTSAASV-p;u|RVSIRLPSTSGSEGV-p;u|___MARGSVSDEEMM-p;u|NPRKYLRSVGDGETV-p;u|AKRPRVTSGGVSESP-p;u…	PYKRRRSTPAPKEEE-p;u|NPRKYLRSVGDGETV-p;u|CRLNRSDSDSSTLSK-p;u|RGRKRFVSEGDGGRL-p;u|MSRARIGSDPLAYEP-p;u|RERSRTGSESSQTGT-p;u|RDSGRGDSVSDSGSD-p;u|PHGPRSASVSSISLT-p;u|SGRPRTTSFAESCKP-p;u|AAAHRKGSSSNEPSS-p;u|LSRSRTASLTSAASV-p;u|VKRERTSSLTQFPPS-p;u|PRLRSVSSYGNIRAV-p;u|GQRKRLISSVEDFTE-p;u|EIRSRHSSYPAGTED-p;u|GSRVRVDSTAKVAEI-p;u|AKRPRVTSGGVSESP-p;u|TRRTRTFSATVRASQ-p;u|CGSSGYFSSSPTLSS-p;u|VQNKRRRSVTPPEEQ-p;u…	RGRKRFVSEGDGGRL-p;u|TRRTRTFSATVRASQ-p;u|PPRRRPESAPAESSP-p;u|PHGPRSASVSSISLT-p;u|RDSGRGDSVSDSGSD-p;u|CGSSGYFSSSPTLSS-p;u|TRRRRAPSVANVGSH-p;u|GSRVRVDSTAKVAEI-p;u|VQNKRRRSVTPPEEQ-p;u|MSRARIGSDPLAYEP-p;u|LSRSRTASLTSAASV-p;u|PGKRRTQSLSALPKE-p;u|RERSRTGSESSQTGT-p;u|PRLRSVSSYGNIRAV-p;u|PYKRRRSTPAPKEEE-p;u|NPRKYLRSVGDGETV-p;u|EIRSRHSSYPAGTED-p;u|IAKRRRLSSLRASTS-p;u|AAAHRKGSSSNEPSS-p;u|QALSRKASAVNMEKF-p;u…	MSRARIGSDPLAYEP-p;u|RGRKRFVSEGDGGRL-p;u|GSRVRVDSTAKVAEI-p;u|RDSGRGDSVSDSGSD-p;u|PRLRSVSSYGNIRAV-p;u|PHGPRSASVSSISLT-p;u|AAAHRKGSSSNEPSS-p;u|TPRLRSVSSYGNIRA-p;u|CRLNRSDSDSSTLSK-p;u|LSRSRTASLTSAASV-p;u|EIRSRHSSYPAGTED-p;u|PPRRRPESAPAESSP-p;u|SGRPRTTSFAESCKP-p;u|GQRKRLISSVEDFTE-p;u|SPQVRTLSGSRPPLL-p;u|RERSRTGSESSQTGT-p;u|VKRERTSSLTQFPPS-p;u|VQNKRRRSVTPPEEQ-p;u|TRRRRAPSVANVGSH-p;u|RVSIRLPSTSGSEGV-p;u…	PRLRSVSSYGNIRAV-p;u|PYKRRRSTPAPKEEE-p;u|LSRSRTASLTSAASV-p;u|RGRKRFVSEGDGGRL-p;u|EIRSRHSSYPAGTED-p;u|GQRKRLISSVEDFTE-p;u|TPRLRSVSSYGNIRA-p;u|VKRERTSSLTQFPPS-p;u|TRRTRTFSATVRASQ-p;u|NPRKYLRSVGDGETV-p;u|RDSGRGDSVSDSGSD-p;u|TRRRRAPSVANVGSH-p;u|AAAHRKGSSSNEPSS-p;u|RVSIRLPSTSGSEGV-p;u|PGKRRTQSLSALPKE-p;u|GSRVRVDSTAKVAEI-p;u|RERSRTGSESSQTGT-p;u|SPQVRTLSGSRPPLL-p;u|AKRPRVTSGGVSESP-p;u|PHGPRSASVSSISLT-p;u…	RGRKRFVSEGDGGRL-p;u|MSRARIGSDPLAYEP-p;u|CGSSGYFSSSPTLSS-p;u|LSRSRTASLTSAASV-p;u|PRLRSVSSYGNIRAV-p;u|PYKRRRSTPAPKEEE-p;u|PPRRRPESAPAESSP-p;u|RERSRTGSESSQTGT-p;u|PHGPRSASVSSISLT-p;u|RDSGRGDSVSDSGSD-p;u|NPRKYLRSVGDGETV-p;u|SGRPRTTSFAESCKP-p;u|AAAHRKGSSSNEPSS-p;u|PGKRRTQSLSALPKE-p;u|CRLNRSDSDSSTLSK-p;u|TRRTRTFSATVRASQ-p;u|GSRVRVDSTAKVAEI-p;u|VKRERTSSLTQFPPS-p;u|GQRKRLISSVEDFTE-p;u|EIRSRHSSYPAGTED-p;u…	PRLRSVSSYGNIRAV-p;u|RERSRTGSESSQTGT-p;u|AAAHRKGSSSNEPSS-p;u|MSRARIGSDPLAYEP-p;u|TPRLRSVSSYGNIRA-p;u|GSRVRVDSTAKVAEI-p;u|TRRRRAPSVANVGSH-p;u|RDSGRGDSVSDSGSD-p;u|SGRPRTTSFAESCKP-p;u|EIRSRHSSYPAGTED-p;u|SPQVRTLSGSRPPLL-p;u|RGRKRFVSEGDGGRL-p;u|RVSIRLPSTSGSEGV-p;u|VKRERTSSLTQFPPS-p;u|VQNKRRRSVTPPEEQ-p;u|PYKRRRSTPAPKEEE-p;u|PPRRRPESAPAESSP-p;u|LSRSRTASLTSAASV-p;u|GQRKRLISSVEDFTE-p;u|PGKRRTQSLSALPKE-p;u…	CRLNRSDSDSSTLSK-p;u|SGRPRTTSFAESCKP-p;u|RGRKRFVSEGDGGRL-p;u|TRRTRTFSATVRASQ-p;u|GSRVRVDSTAKVAEI-p;u|SPQVRTLSGSRPPLL-p;u|TRRRRAPSVANVGSH-p;u|RDSGRGDSVSDSGSD-p;u|LSRSRTASLTSAASV-p;u|AAAHRKGSSSNEPSS-p;u|PYKRRRSTPAPKEEE-p;u|PHGPRSASVSSISLT-p;u|PGKRRTQSLSALPKE-p;u|AKRPRVTSGGVSESP-p;u|PRLRSVSSYGNIRAV-p;u|MSRARIGSDPLAYEP-p;u|EIRSRHSSYPAGTED-p;u|VKRERTSSLTQFPPS-p;u|RVSIRLPSTSGSEGV-p;u|TPRLRSVSSYGNIRA-p;u…
KINASE-PSP_Akt1/AKT1	n=249|SLC9A1_S648|BTK_T495|DIABLO_S67|BCL2L11_S87|NOS3_S615|ALYREF_S34|TFEB_S467|AKT1_T72|PLCG1_S1248|KDM5A_S287|TSC2_T1462|TARBP2_S283|PKM_S37|LMNA_S404|BRCA1_T509|MAP3K11_S674|CASP9_S196|TBC1D4_S318|CCDC88A_S1417|MTOR_T2446|PHB_T258|SLC9A1_S796|ZRANB1_S78|MAP3K5_S83|HTRA2_S212|NDRG2_T348|BCL10_S218|NF2_S315|TOPBP1_S1159|TWIST1_T121|SLC9A1_S703|EGFR_S229|CDKN1A_S146|BTK_S51|MITF_S516|IRAK1_T100|…	249	31.7	29.7	30.9	30.9	30.1	29.7	30.1	28.9	31.7	28.9	31.3	30.9	30.9	30.5	30.9	30.9	31.7	29.7	30.1	30.1	30.1	30.9	30.9	30.5	29.7	30.1	28.9	31.7	27.7	30.1	30.9	30.5	31.7	28.9	30.1	LGRERLGSFGSITRQ-p;u|FIFMRRSSLLSRSSS-p;u|ATPQRSGSVSNYRSC-p;u|HGRAREGSFESRYQQ-p;u|PVRMRRNSFTPLSSS-p;u|AKRPRVTSGGVSESP-p;u|GLRPRGYTISDSAPS-p;u|MSRARIGSDPLAYEP-p;u|RGRKRFVSEGDGGRL-p;u|KDIIRQPSEEEIIKL-p;u|RMRGRLGSVDSFERS-p;u|NVNGRLPSLGNKEPP-p;u|GSRVRVDSTAKVAEI-p;u|IRRPRNYSVGSRPLK-p;u|NPRKYLRSVGDGETV-p;u|SGRPRTTSFAESCKP-p;u|EPRPRTRSNPEGAED-p;u|KRRLRKNSSRDSGRG-p;u|TRRTRTFSATVRASQ-p;u|VPSGRKGSGDYMPMS-p;u…	KDIIRQPSEEEIIKL-p;u|LGRERLGSFGSITRQ-p;u|QEKSPGTSPLLSRKM-p;u|PVRMRRNSFTPLSSS-p;u|GTMKRNATSPQVQRP-p;u|ASPARRASAILPGVL-p;u|TRRRRAPSVANVGSH-p;u|VRRPRSRSRDSGDEN-p;u|SPRRRAASMDNNSKF-p;u|PFRGRSRSAPPNLWA-p;u|QRIQRCLSDPGPHPE-p;u|LSRSRTASLTSAASV-p;u|FIFMRRSSLLSRSSS-p;u|KRPLRAPSPEPAAPR-p;u|RSRGRASSHSSQTQG-p;u|APRRRAVSMDNSNKY-p;u|KLRIRTPSGEFLERR-p;u|NPGGRPITPPRNSAK-p;u|IRRPRNYSVGSRPLK-p;u|NVNGRLPSLGNKEPP-p;u…	EFRSRCSSVTGVQRR-p;u|EPRPRTRSNPEGAED-p;u|RVRVRLLSGDTYEAV-p;u|LPRPRLNTSDFQKLK-p;u|ATPQRSGSVSNYRSC-p;u|LSRSRTASLTSAASV-p;u|AYTPRSLSAPIFTTS-p;u|IRRPRNYSVGSRPLK-p;u|QKRARSRSFSGLIKR-p;u|PVRMRRNSFTPLSSS-p;u|RTPRRSKSDGEAKPE-p;u|GLPERSVSLTGAPES-p;u|RSRGRASSHSSQTQG-p;u|SQRGRSGSGNFGGGR-p;u|APRRRAVSMDNSNKY-p;u|VKRERTSSLTQFPPS-p;u|PKRERPTSPAPHRPP-p;u|GGRSRSGSIVELIAG-p;u|GLETRRLSLPSSKAK-p;u|GQRSRLASMLDSDTE-p;u…	RGRKRFVSEGDGGRL-p;u|MSRARIGSDPLAYEP-p;u|ATPQRSGSVSNYRSC-p;u|QKRARSRSFSGLIKR-p;u|RMRGRLGSVDSFERS-p;u|PVRMRRNSFTPLSSS-p;u|IRRPRNYSVGSRPLK-p;u|QRIQRCLSDPGPHPE-p;u|EFRSRCSSVTGVQRR-p;u|AKRPRVTSGGVSESP-p;u|KKMNRSVSLTIY___-p;u|GSRVRVDSTAKVAEI-p;u|SGRPRTTSFAESCKP-p;u|SGRARTSSFAEPGGG-p;u|RTPRRSKSDGEAKPE-p;u|SQRGRSGSGNFGGGR-p;u|PFRGRSRSAPPNLWA-p;u|LPRPRLNTSDFQKLK-p;u|AFRRRANTLSHFPIE-p;u|HGRAREGSFESRYQQ-p;u…	KDIIRQPSEEEIIKL-p;u|RGRKRFVSEGDGGRL-p;u|PKRERPTSPAPHRPP-p;u|ATPQRSGSVSNYRSC-p;u|QDTQRRTSMGGTQQQ-p;u|GLETRRLSLPSSKAK-p;u|PSTSRRFSPPSSSLQ-p;u|SPRRRAASMDNNSKF-p;u|KLRIRTPSGEFLERR-p;u|RVRVRLLSGDTYEAV-p;u|MSRARIGSDPLAYEP-p;u|QRIQRCLSDPGPHPE-p;u|QEKSPGTSPLLSRKM-p;u|GSRVRVDSTAKVAEI-p;u|KASSRRSSFSMEEGD-p;u|SGRARTSSFAEPGGG-p;u|SFRRRHNSWSSSSRH-p;u|NPLMRRNSVTPLASP-p;u|PVRMRRNSFTPLSSS-p;u|SGRPRTTSFAESCKP-p;u…	EPRPRTRSNPEGAED-p;u|NPLMRRNSVTPLASP-p;u|NVRVSNGSPSLERMD-p;u|APRRRAVSMDNSNKY-p;u|SPRRRAASMDNNSKF-p;u|PVRMRRNSFTPLSSS-p;u|ATPQRSGSVSNYRSC-p;u|RMRGRLGSVDSFERS-p;u|AYTPRSLSAPIFTTS-p;u|QDTQRRTSMGGTQQQ-p;u|NPRKYLRSVGDGETV-p;u|AETAAADSEPDTDPE-p;u|QRIQRCLSDPGPHPE-p;u|IRRPRNYSVGSRPLK-p;u|ANRPRKSSVNGSSAT-p;u|QSRIRIDSLSAQLSQ-p;u|RGRKRFVSEGDGGRL-p;u|KDIIRQPSEEEIIKL-p;u|RSRGRASSHSSQTQG-p;u|GLPERSVSLTGAPES-p;u…	RALSRQLSSGVSEIR-p;u|TTSTRTYSLGSALRP-p;u|HGRAREGSFESRYQQ-p;u|GLETRRLSLPSSKAK-p;u|RGRKRFVSEGDGGRL-p;u|RFRDRSFSEGGERLL-p;u|TRRTRTFSATVRASQ-p;u|ATPQRSGSVSNYRSC-p;u|INRERQKSLTLTPTR-p;u|QKRARSRSFSGLIKR-p;u|NVNGRLPSLGNKEPP-p;u|ARRNRKRSIKYDSLL-p;u|NPLMRRNSVTPLASP-p;u|AYTPRSLSAPIFTTS-p;u|ASPARRASAILPGVL-p;u|SQRGRSGSGNFGGGR-p;u|RTPRRSKSDGEAKPE-p;u|PFRGRSRSAPPNLWA-p;u|VPSGRKGSGDYMPMS-p;u|TRRRRAPSVANVGSH-p;u…	ATPQRSGSVSNYRSC-p;u|PVRMRRNSFTPLSSS-p;u|FIFMRRSSLLSRSSS-p;u|QDTQRRTSMGGTQQQ-p;u|HGRAREGSFESRYQQ-p;u|NPGGRPITPPRNSAK-p;u|MSRARIGSDPLAYEP-p;u|IRRPRNYSVGSRPLK-p;u|GLPERSVSLTGAPES-p;u|AYTPRSLSAPIFTTS-p;u|RGRKRFVSEGDGGRL-p;u|GSRVRVDSTAKVAEI-p;u|QRIQRCLSDPGPHPE-p;u|NPLMRRNSVTPLASP-p;u|RALSRQLSSGVSEIR-p;u|PFRGRSRSAPPNLWA-p;u|RMRGRLGSVDSFERS-p;u|RSRGRASSHSSQTQG-p;u|EPRPRTRSNPEGAED-p;u|NVNGRLPSLGNKEPP-p;u…	VPSGRKGSGDYMPMS-p;u|SPRRRAASMDNNSKF-p;u|QSRIRIDSLSAQLSQ-p;u|PSTSRRFSPPSSSLQ-p;u|AYTPRSLSAPIFTTS-p;u|RSRGRASSHSSQTQG-p;u|MCRLDIDSPPITARN-p;u|PVRMRRNSFTPLSSS-p;u|RVRVRLLSGDTYEAV-p;u|IRRPRNYSVGSRPLK-p;u|RTPRRSKSDGEAKPE-p;u|RALSRQLSSGVSEIR-p;u|QKRARSRSFSGLIKR-p;u|FIFMRRSSLLSRSSS-p;u|LSRSRTASLTSAASV-p;u|KLRIRTPSGEFLERR-p;u|RGRKRFVSEGDGGRL-p;u|ATPQRSGSVSNYRSC-p;u|ANRPRKSSVNGSSAT-p;u|NPGGRPITPPRNSAK-p;u…	IRRPRNYSVGSRPLK-p;u|PVRMRRNSFTPLSSS-p;u|KASSRRSSFSMEEGD-p;u|ATPQRSGSVSNYRSC-p;u|EPRPRTRSNPEGAED-p;u|RGRKRFVSEGDGGRL-p;u|QRIQRCLSDPGPHPE-p;u|MSRARIGSDPLAYEP-p;u|RSRGRASSHSSQTQG-p;u|LSRSRTASLTSAASV-p;u|RFRDRSFSEGGERLL-p;u|QSRIRIDSLSAQLSQ-p;u|QKRARSRSFSGLIKR-p;u|KDIIRQPSEEEIIKL-p;u|RALSRQLSSGVSEIR-p;u|MCRLDIDSPPITARN-p;u|KLRIRTPSGEFLERR-p;u|SGRARTSSFAEPGGG-p;u|AFRRRANTLSHFPIE-p;u|SQRGRSGSGNFGGGR-p;u…	RALSRQLSSGVSEIR-p;u|ATPQRSGSVSNYRSC-p;u|ASPARRASAILPGVL-p;u|EPRPRTRSNPEGAED-p;u|IRRPRNYSVGSRPLK-p;u|KRPLRAPSPEPAAPR-p;u|PVRMRRNSFTPLSSS-p;u|MSRARIGSDPLAYEP-p;u|GSRVRVDSTAKVAEI-p;u|NPLMRRNSVTPLASP-p;u|KLRIRTPSGEFLERR-p;u|GTMKRNATSPQVQRP-p;u|PKRERPTSPAPHRPP-p;u|KRRLRKNSSRDSGRG-p;u|RSRGRASSHSSQTQG-p;u|RSRTRTDSYSAGQSV-p;u|PDCRRTISAPVVRPK-p;u|PFRGRSRSAPPNLWA-p;u|QSRIRIDSLSAQLSQ-p;u|QRIQRCLSDPGPHPE-p;u…	RSRGRASSHSSQTQG-p;u|SPRRRAASMDNNSKF-p;u|SGRPRTTSFAESCKP-p;u|RMRGRLGSVDSFERS-p;u|LPRPRLNTSDFQKLK-p;u|KDIIRQPSEEEIIKL-p;u|APRRRAVSMDNSNKY-p;u|RGRKRFVSEGDGGRL-p;u|ATPQRSGSVSNYRSC-p;u|TRRTRTFSATVRASQ-p;u|GSRVRVDSTAKVAEI-p;u|SQRGRSGSGNFGGGR-p;u|PVRMRRNSFTPLSSS-p;u|QSRIRIDSLSAQLSQ-p;u|NVNGRLPSLGNKEPP-p;u|KKMNRSVSLTIY___-p;u|SGRARTSSFAEPGGG-p;u|SFRRRHNSWSSSSRH-p;u|TRRRRAPSVANVGSH-p;u|KRPLRAPSPEPAAPR-p;u…
KINASE-PSP_PKCB/PRKCB	n=54|NOX5_S498|ANXA1_S28|MAPT_S352|ITGB2_S745|GRN_S81|PRKCB_S660|SHC1_S213|MAPT_S258|KCNC4_S8|ATF2_S121|PTPN11_S595|GSK3B_S9|ANXA2_S26|ORAI1_S27|KCNC4_S9|OCLN_S490|RPS6KB2_S473|ITGB2_T758|ORAI1_S30|MSX2_T141|CFLAR_S193|PIK3CG_S582|C5AR1_S334|AKT1_S473|IBTK_S1200|KCNC4_S15|IRS1_S323|KCNC4_S21|PRKAA1_S496|PTPN11_S580|SHC1_S139|NOX5_T494|EPB41_S312|CFLAR_S193|STMN1_S25|TYR_S527|MAPT_S324|CHAT_S476|C…	53	17	15.1	15.1	17	13.2	15.1	15.1	17	15.1	15.1	15.1	15.1	17	15.1	15.1	17	15.1	15.1	13.2	15.1	15.1	15.1	15.1	15.1	15.1	15.1	15.1	17	15.1	15.1	15.1	15.1	17	13.2	13.2	ATPQRSGSVSNYRSC-p;u|SGRPRTTSFAESCKP-p;u|QAFELILSPRSKESV-p;u|SGRARTSSFAEPGGG-p;u|EEWTRHGSFVNKPTR-p;u|MVGGKPGSFRVRASS-p;u|SVPEFPLSPPKKKDL-p;u|KDGATMKTFCGTPEY-p;u|RPHFPQFSYSASGTA-p;u	EEWTRHGSFVNKPTR-p;u|MVGGKPGSFRVRASS-p;u|RPHFPQFSYSASGTA-p;u|SGRPRTTSFAESCKP-p;u|SVPEFPLSPPKKKDL-p;u|ATPQRSGSVSNYRSC-p;u|QAFELILSPRSKESV-p;u|SGRARTSSFAEPGGG-p;u	ATPQRSGSVSNYRSC-p;u|MVGGKPGSFRVRASS-p;u|SGRARTSSFAEPGGG-p;u|SGRPRTTSFAESCKP-p;u|SVPEFPLSPPKKKDL-p;u|EEWTRHGSFVNKPTR-p;u|RPHFPQFSYSASGTA-p;u|QAFELILSPRSKESV-p;u	ATPQRSGSVSNYRSC-p;u|QAFELILSPRSKESV-p;u|SGRPRTTSFAESCKP-p;u|EEWTRHGSFVNKPTR-p;u|SGRARTSSFAEPGGG-p;u|SVPEFPLSPPKKKDL-p;u|RPHFPQFSYSASGTA-p;u|KDGATMKTFCGTPEY-p;u|MVGGKPGSFRVRASS-p;u	EEWTRHGSFVNKPTR-p;u|ATPQRSGSVSNYRSC-p;u|SGRARTSSFAEPGGG-p;u|SGRPRTTSFAESCKP-p;u|MVGGKPGSFRVRASS-p;u|QAFELILSPRSKESV-p;u|SVPEFPLSPPKKKDL-p;u	ATPQRSGSVSNYRSC-p;u|EEWTRHGSFVNKPTR-p;u|SGRPRTTSFAESCKP-p;u|RPHFPQFSYSASGTA-p;u|SGRARTSSFAEPGGG-p;u|MVGGKPGSFRVRASS-p;u|SVPEFPLSPPKKKDL-p;u|QAFELILSPRSKESV-p;u	ATPQRSGSVSNYRSC-p;u|SVPEFPLSPPKKKDL-p;u|QAFELILSPRSKESV-p;u|RPHFPQFSYSASGTA-p;u|EEWTRHGSFVNKPTR-p;u|SGRPRTTSFAESCKP-p;u|SGRARTSSFAEPGGG-p;u|MVGGKPGSFRVRASS-p;u	EEWTRHGSFVNKPTR-p;u|ATPQRSGSVSNYRSC-p;u|SGRARTSSFAEPGGG-p;u|SGRPRTTSFAESCKP-p;u|MVGGKPGSFRVRASS-p;u|KDGATMKTFCGTPEY-p;u|RPHFPQFSYSASGTA-p;u|SVPEFPLSPPKKKDL-p;u|QAFELILSPRSKESV-p;u	MVGGKPGSFRVRASS-p;u|ATPQRSGSVSNYRSC-p;u|SVPEFPLSPPKKKDL-p;u|KDGATMKTFCGTPEY-p;u|QAFELILSPRSKESV-p;u|SGRARTSSFAEPGGG-p;u|EEWTRHGSFVNKPTR-p;u|SGRPRTTSFAESCKP-p;u	EEWTRHGSFVNKPTR-p;u|ATPQRSGSVSNYRSC-p;u|SGRARTSSFAEPGGG-p;u|SGRPRTTSFAESCKP-p;u|MVGGKPGSFRVRASS-p;u|RPHFPQFSYSASGTA-p;u|SVPEFPLSPPKKKDL-p;u|QAFELILSPRSKESV-p;u	ATPQRSGSVSNYRSC-p;u|EEWTRHGSFVNKPTR-p;u|KDGATMKTFCGTPEY-p;u|SGRPRTTSFAESCKP-p;u|MVGGKPGSFRVRASS-p;u|SGRARTSSFAEPGGG-p;u|SVPEFPLSPPKKKDL-p;u|QAFELILSPRSKESV-p;u	EEWTRHGSFVNKPTR-p;u|SGRPRTTSFAESCKP-p;u|ATPQRSGSVSNYRSC-p;u|MVGGKPGSFRVRASS-p;u|SGRARTSSFAEPGGG-p;u|KDGATMKTFCGTPEY-p;u|SVPEFPLSPPKKKDL-p;u|QAFELILSPRSKESV-p;u
KINASE-PSP_CDK1	n=494|MDM4_S96|TOP2A_S1361|RAD9A_S328|RANBP2_T2153|WEE1_S123|MCL1_T92|NUMA1_T2055|CDCA5_S33|MAPT_T231|BARD1_S251|FLNA_S1533|NCL_T121|VGLL4_S58|SIRT3_S159|PRDX1_T90|RAD9A_S277|NCKAP5L_S447|PTPN1_S386|SPAG5_S135|PDS5B_T1370|ARHGAP19_T404|MAPT_S202|ECT2_T373|CHEK1_S286|CLASP2_S507|NOLC1_T607|STIM1_S668|UHRF1_S639|EPB41_T60|ITPR1_T800|EPN1_S382|ZMYM3_T826|RANGAP1_T409|VGLL4_T159|SRRM2_T1413|CDC27_T20…	486	51.9	52.3	51.9	51.6	51.2	52.3	51.6	49.6	51.6	52.9	51.9	52.3	51.6	52.1	52.1	51.6	51.6	53.5	51.2	51.9	51.6	52.1	52.3	52.1	52.3	51.6	52.9	51.9	50.8	51.6	52.1	52.1	51.9	49.2	51.2	KVAAETQSPSLFGST-p;u|SRAAVVTSPPPTTAP-p;u|LAEAALESPRPALVR-p;u|GDEEVPRSPFKVKVL-p;u|SEMKYLGSPITTVPK-p;u|EPTAPALSPRSSFAS-p;u|KTQTPPVSPAPQPTE-p;u|QPLTVPVSPKFSTRF-p;u|ILDLISESPIKGRAQ-p;u|SKDAKVPSPPPGHKW-p;u|QAFELILSPRSKESV-p;u|VLPSISLSPGPQPPK-p;u|RDPGMVRSPQNQYPA-p;u|KDSKPSSTPRSKGQE-p;u|VCPDVPRTPVGKFLG-p;u|KCSGPGLSPGMVRAN-p;u|NTMPRPSTPLDGVST-p;u|ASRPAGLSPTLTPGE-p;u|KVSNLQVSPKSEDIS-p;u|VVKQEQLSPKKKENN-p;u…	PTPAVLLSPTKEPPP-p;u|TMKRNATSPQVQRPS-p;u|EPTAPALSPRSSFAS-p;u|RDPGMVRSPQNQYPA-p;u|IGEETDSSPGRKKFP-p;u|GGDEIPFSPYRVRAV-p;u|PSTSKAVSPPHLDGP-p;u|RSLGLSLSGGDQEDA-p;u|EEERLRLSPSPTSQR-p;u|EDEILNRSPRNRKPR-p;u|APQTQHVSPMRQVEP-p;u|ERLRLSPSPTSQRSR-p;u|EPSTVPGTPPPKKFR-p;u|SHSQDLGSPERHQPV-p;u|GTQNPVSSPGMSQEL-p;u|SVAGSPLSPGPVRAP-p;u|VLPSISLSPGPQPPK-p;u|LQKAGKLSPLKVQPK-p;u|AQAQAASTPRKARAS-p;u|KRIAKRRSPPADAIP-p;u…	IATEHIPSPAKKVPR-p;u|QSPGGFGSPAPSQAE-p;u|EKKQITTSPITVRKN-p;u|SHSQDLGSPERHQPV-p;u|RTGPPPISPSKRKFS-p;u|GGKRSRLTPVSPESS-p;u|SSSCGKDTPSKKRKL-p;u|KSRNEVVTPEKVCKN-p;u|EKLATKSSPVKVGEK-p;u|RSRLTPVSPESSSTE-p;u|VPYVVPLSPKLPKTK-p;u|SSATLLNSPDRARRL-p;u|PLEDTVLSPTKKRKR-p;u|VKHPGCTTPVTVKIP-p;u|EHGGLIRSPRHEKKK-p;u|PISDEDRTPRKRISK-p;u|SPLVGDISPKSSPHE-p;u|PLSKLLGSLDEVVLL-p;u|LSPAFDHSPNKIMTE-p;u|TRRDLNESPVKSFVS-p;u…	KVAAETQSPSLFGST-p;u|SITSPPLSPALPKYK-p;u|SRAAVVTSPPPTTAP-p;u|NIKSEPVSPPRDRTT-p;u|QAFELILSPRSKESV-p;u|VCPDVPRTPVGKFLG-p;u|VEVPAVQSPRRSPRI-p;u|SKDAKVPSPPPGHKW-p;u|GGKRSRLTPVSPESS-p;u|EPTAPALSPRSSFAS-p;u|DVIAPLITPQKKEWN-p;u|KSRNEVVTPEKVCKN-p;u|RSRLTPVSPESSSTE-p;u|IATEHIPSPAKKVPR-p;u|LQAKPTSSPAKGPPQ-p;u|PSTSKAVSPPHLDGP-p;u|DPQQLQLSPLKGLSL-p;u|EDEILNRSPRNRKPR-p;u|PVVSGDTSPRHLSNV-p;u|VKHPGCTTPVTVKIP-p;u…	SAKPSSTTPRLSRLA-p;u|TKSSKSSTPVPSKQS-p;u|ALLSATVTPQKAKLG-p;u|RESSRDTSPVRSFQP-p;u|EPTAPALSPRSSFAS-p;u|VEVPAVQSPRRSPRI-p;u|LRRSQRKSGSELPSI-p;u|TSTPGRRSCFGFEGL-p;u|SYENLLRTPTPPEVT-p;u|ENLLRTPTPPEVTKI-p;u|VPNDYMTSPARLGSQ-p;u|SITSPPLSPALPKYK-p;u|KVAAETQSPSLFGST-p;u|ILDLISESPIKGRAQ-p;u|GTQNPVSSPGMSQEL-p;u|SLQLGAVSPGTLTPT-p;u|QPLTVPVSPKFSTRF-p;u|KNENTEGSPQEDGVE-p;u|AGTAGALTPQHVRAH-p;u|PSTSKAVSPPHLDGP-p;u…	EKLATKSSPVKVGEK-p;u|ENLLRTPTPPEVTKI-p;u|EDEILNRSPRNRKPR-p;u|LPNNTSSSPQPKKKP-p;u|KVAAETQSPSLFGST-p;u|PSTSKAVSPPHLDGP-p;u|ILDLISESPIKGRAQ-p;u|KTLKNIISPPWDFRE-p;u|RESSRDTSPVRSFQP-p;u|KTQTPPVSPAPQPTE-p;u|QSPGGFGSPAPSQAE-p;u|GRVMLGETNPADSKP-p;u|IYISPLKSPYKISEG-p;u|FDFEGSLSPVIAPKK-p;u|NTMPRPSTPLDGVST-p;u|VLDAVPRTPSRERSS-p;u|TKSSKSSTPVPSKQS-p;u|SSNSDGISPKRRRLS-p;u|EPSTVPGTPPPKKFR-p;u|SRAAVVTSPPPTTAP-p;u…	SRSLYASSPGGVYAT-p;u|SLIVPGKSPTRKKSG-p;u|DKRLSTHSPFRTLNI-p;u|TPGSRSRTPSLPTPP-p;u|LLDIPLQTPHKLVDT-p;u|VVRTPPKSPSSAKSR-p;u|GGDEIPFSPYRVRAV-p;u|KKVAVVRTPPKSPSS-p;u|RVDLEPVSPRSCLTK-p;u|RRGLAPNTPGKARKL-p;u|LKATVTPSPVKGKGK-p;u|ENLLRTPTPPEVTKI-p;u|ILDLISESPIKGRAQ-p;u|GDEEVPRSPFKVKVL-p;u|ASASQKLSPLQKLSS-p;u|LFRFPATSPLKTLPR-p;u|GPETPAISPSKRARP-p;u|PVVSGDTSPRHLSNV-p;u|PSPEPPPSPLQVPTY-p;u|SPGGPQLSPQLPRNS-p;u…	NPGGRPITPPRNSAK-p;u|RESSRDTSPVRSFQP-p;u|SKDAKVPSPPPGHKW-p;u|EKLATKSSPVKVGEK-p;u|ILDLISESPIKGRAQ-p;u|NIKSEPVSPPRDRTT-p;u|RSLGLSLSGGDQEDA-p;u|RSRLTPVSPESSSTE-p;u|ASASQKLSPLQKLSS-p;u|EDEILNRSPRNRKPR-p;u|LQSASSHSPTPQRRP-p;u|KELQRQASPSIVIAL-p;u|KDEILPTTPISEQKG-p;u|NTMPRPSTPLDGVST-p;u|KVAAETQSPSLFGST-p;u|IGEETDSSPGRKKFP-p;u|GGKRSRLTPVSPESS-p;u|AVSPGTLTPTGVVSG-p;u|DLEVLTSSPTRNLNG-p;u|LNQINKASPRRLPRK-p;u…	EKLATKSSPVKVGEK-p;u|EEERLRLSPSPTSQR-p;u|ERLRLSPSPTSQRSR-p;u|ASASQKLSPLQKLSS-p;u|QSPGGFGSPAPSQAE-p;u|SLIVPGKSPTRKKSG-p;u|TLSIKKLSPIIEDSR-p;u|LQAKPTSSPAKGPPQ-p;u|PNPSTSASPKKSPPP-p;u|LSEKKNKSPPADPPR-p;u|SKDAKVPSPPPGHKW-p;u|EHGGLIRSPRHEKKK-p;u|KVAAETQSPSLFGST-p;u|QASSTPLSPTRITRL-p;u|VKHPGCTTPVTVKIP-p;u|RSGPRAPSPTKPLRR-p;u|PGPQPPKSPGPHSEE-p;u|RESSRDTSPVRSFQP-p;u|PSTSKAVSPPHLDGP-p;u|APAPAEKTPVKKKAR-p;u…	EKLATKSSPVKVGEK-p;u|EDEILNRSPRNRKPR-p;u|PGGNIYISPLKSPYK-p;u|VLDAVPRTPSRERSS-p;u|RESSRDTSPVRSFQP-p;u|SRAAVVTSPPPTTAP-p;u|PSTSKAVSPPHLDGP-p;u|LNQINKASPRRLPRK-p;u|ASASQKLSPLQKLSS-p;u|ETSIFTPSPCKIPPP-p;u|DTRQIQPSPPWSYDQ-p;u|ERLRLSPSPTSQRSR-p;u|TSTPGRRSCFGFEGL-p;u|SVAGSPLSPGPVRAP-p;u|LNNSNLFSPVNRDSE-p;u|RSLGLSLSGGDQEDA-p;u|KTQTPPVSPAPQPTE-p;u|RSGPRAPSPTKPLRR-p;u|EEERLRLSPSPTSQR-p;u|IYISPLKSPYKISEG-p;u…	QSPGGFGSPAPSQAE-p;u|RSRLTPVSPESSSTE-p;u|GGKRSRLTPVSPESS-p;u|KELQRQASPSIVIAL-p;u|PSTSKAVSPPHLDGP-p;u|VLPSISLSPGPQPPK-p;u|EPTAPALSPRSSFAS-p;u|KTQTPPVSPAPQPTE-p;u|RESSRDTSPVRSFQP-p;u|RSLGLSLSGGDQEDA-p;u|TMKRNATSPQVQRPS-p;u|EITKLDSSIISEGKI-p;u|APGVVMASSPALPTQ-p;u|KRIAKRRSPPADAIP-p;u|KTLKNIISPPWDFRE-p;u|QRVSDQNSPVLPKKS-p;u|QLRNQGETPTTEVPA-p;u|EKENGFSSPPQIKDE-p;u|AGTAGALTPQHVRAH-p;u|EHGGLIRSPRHEKKK-p;u…	LPNNTSSSPQPKKKP-p;u|SLIVPGKSPTRKKSG-p;u|ERLRLSPSPTSQRSR-p;u|EEERLRLSPSPTSQR-p;u|LAEAALESPRPALVR-p;u|SYENLLRTPTPPEVT-p;u|ENLLRTPTPPEVTKI-p;u|VCPDVPRTPVGKFLG-p;u|PNPSTSASPKKSPPP-p;u|VLPSISLSPGPQPPK-p;u|GGDEIPFSPYRVRAV-p;u|SGAQASSTPLSPTRI-p;u|SRAAVVTSPPPTTAP-p;u|LGPYEAVTPLTKAAD-p;u|TKSSKSSTPVPSKQS-p;u|QASSTPLSPTRITRL-p;u|PSTSKAVSPPHLDGP-p;u|SHSQDLGSPERHQPV-p;u|EAEAEASSPKGKFSL-p;u|GRVMLGETNPADSKP-p;u…
KINASE-PSP_CDK2	n=345|NR1I2_S114|SNAPIN_S133|RAD9A_S328|PELP1_S477|MCL1_T92|RBL2_S639|BARD1_S251|MED1_S1207|BTG1_S159|NCL_T121|EEF2_T435|RRN3_S44|CDT1_T29|MCM3_T722|ANKRD17_S2401|CHEK1_S286|MKL1_T573|AARS2_T673|RBL2_T1097|ZMYM3_T826|RALY_S135|ATF2_T116|RNF4_T26|ITGB3BP_S46|CDKN1A_S130|ING5_T152|ELF4_T643|DNM2_S764|PTPN12_S19|GATA3_T156|POLL_S177|TERF2_S365|RECQL4_S251|DIAPH3_T19|ELK4_S387|ESR1_S118|FOXO1_S249|IM…	340	55.3	53.5	54.4	54.4	52.6	53.8	54.7	52.9	55.3	53.8	55	53.2	54.4	55.9	56.5	54.4	55.3	56.2	52.6	54.4	54.7	56.5	53.5	55.9	53.8	54.7	53.8	55	52.9	54.7	56.5	55.9	55.3	51.8	52.6	EDDTVPLSPLKYMAQ-p;u|KTQTPPVSPAPQPTE-p;u|LDLSPLATPIIRSKI-p;u|ILDLISESPIKGRAQ-p;u|QPVSAPPSPRDISME-p;u|QAFELILSPRSKESV-p;u|FDYRGRLSPVPVPRA-p;u|VLPSISLSPGPQPPK-p;u|RDPGMVRSPQNQYPA-p;u|SNLGHPESPPRKRLK-p;u|LEKLTLNSPIFDKPL-p;u|WLDDLLASPPPSGGG-p;u|LAPPPLLSPLLPSIK-p;u|SSPTAAGTPNKETAG-p;u|NPGGRPITPPRNSAK-p;u|LQKAGKLSPLKVQPK-p;u|LNNSNLFSPVNRDSE-p;u|VPYVVPLSPKLPKTK-p;u|ITDPVVLSPKDRVRD-p;u|SPLVGDISPKSSPHE-p;u…	RDPGMVRSPQNQYPA-p;u|QRVQAMKSPDHNGED-p;u|PSTSKAVSPPHLDGP-p;u|LDLSPLATPIIRSKI-p;u|APRRRSPSPTPTPGP-p;u|SSPLSPLSPGIKSPT-p;u|GLGRSITSPTTLYDR-p;u|LLEDGSESPAKRICP-p;u|VLPSISLSPGPQPPK-p;u|CIAGSPLTPRRVTEV-p;u|LQKAGKLSPLKVQPK-p;u|SVHERYSSPTAGSAK-p;u|QMAGTPITPLKDGFT-p;u|NPGGRPITPPRNSAK-p;u|TPMYGSQTPLQDGSR-p;u|HKNETMLSPREKIFY-p;u|KKSVITYSPTTGTCQ-p;u|TPAAIPATPVAVSQP-p;u|SGEQAEGSPGGPGDS-p;u|DEICIAGSPLTPRRV-p;u…	QSPGGFGSPAPSQAE-p;u|RVKALPLSPRKRLGD-p;u|MYLSPVRSPKKKGST-p;u|PTQALPASPALKNKR-p;u|RKILGQSSPEKKIRI-p;u|VAFSEITSPSKRSQP-p;u|KSRNEVVTPEKVCKN-p;u|EKLATKSSPVKVGEK-p;u|VPYVVPLSPKLPKTK-p;u|LEKLTLNSPIFDKPL-p;u|EFSSGAKSPSKSGAQ-p;u|APSVSHVSPRKNPSV-p;u|AQNEATSTPHRIRRK-p;u|GIPLPAESPKKGPKK-p;u|SPLVGDISPKSSPHE-p;u|LSPAFDHSPNKIMTE-p;u|KTSDIFGSPVTATSR-p;u|RRTSEEDTPKKKKHK-p;u|ARSPARISPHIKDGE-p;u|KPQKLARSPARISPH-p;u…	SITSPPLSPALPKYK-p;u|QAFELILSPRSKESV-p;u|LEKLTLNSPIFDKPL-p;u|DVIAPLITPQKKEWN-p;u|KSRNEVVTPEKVCKN-p;u|GIPLPAESPKKGPKK-p;u|LDLSPLATPIIRSKI-p;u|EDDTVPLSPLKYMAQ-p;u|KMKNKPRSPVVELSK-p;u|PSAARGGSPLPGPAQ-p;u|LNSPGPLSPSGMKGT-p;u|QPVSAPPSPRDISME-p;u|PSTSKAVSPPHLDGP-p;u|SPTPAPFSPFNPTSL-p;u|DPQQLQLSPLKGLSL-p;u|AQNEATSTPHRIRRK-p;u|ILDLISESPIKGRAQ-p;u|EKLATKSSPVKVGEK-p;u|QMAGTPITPLKDGFT-p;u|VLPSISLSPGPQPPK-p;u…	KMKNKPRSPVVELSK-p;u|SPTPAPFSPFNPTSL-p;u|FDYRGRLSPVPVPRA-p;u|AQNEATSTPHRIRRK-p;u|SITSPPLSPALPKYK-p;u|MYLSPVRSPKKKGST-p;u|ILDLISESPIKGRAQ-p;u|PSTSKAVSPPHLDGP-p;u|VLDKANKTPLRPLDP-p;u|KTQTPPVSPAPQPTE-p;u|HKNETMLSPREKIFY-p;u|QRVQAMKSPDHNGED-p;u|TPAAIPATPVAVSQP-p;u|LLEDGSESPAKRICP-p;u|QYSQQQNSPQKHKNK-p;u|QPVSAPPSPRDISME-p;u|HGSGWAETPRTDRGG-p;u|SLLTRSPTPAPFSPF-p;u|SSPLSPLSPGIKSPT-p;u|APRRRSPSPTPTPGP-p;u…	MYLSPVRSPKKKGST-p;u|FDYRGRLSPVPVPRA-p;u|EKLATKSSPVKVGEK-p;u|LPNNTSSSPQPKKKP-p;u|PASSPVSSPSKHGDR-p;u|PSTSKAVSPPHLDGP-p;u|ILDLISESPIKGRAQ-p;u|HKNETMLSPREKIFY-p;u|KTQTPPVSPAPQPTE-p;u|QSPGGFGSPAPSQAE-p;u|IYISPLKSPYKISEG-p;u|LDTPGIISPGKQKRH-p;u|RRDMQPLSPISVHER-p;u|LNSPGPLSPSGMKGT-p;u|LNNSNLFSPVNRDSE-p;u|AVIPINGSPRTPRRG-p;u|NPGGRPITPPRNSAK-p;u|LDLSPLATPIIRSKI-p;u|PPPTRPVSPPQKAKE-p;u|TTLAGPLTPPVKHFQ-p;u…	PVYEVPATPKYATPA-p;u|LDLSPLATPIIRSKI-p;u|APRPVPGSPARDAPA-p;u|LKATVTPSPVKGKGK-p;u|ILDLISESPIKGRAQ-p;u|MYLSPVRSPKKKGST-p;u|RLPEASQSPLVLKQA-p;u|EEWDPEYTPKSKKYF-p;u|SAMLVPVTPEVKPKR-p;u|PETNIDKTPKKAQVS-p;u|SVPEFPLSPPKKKDL-p;u|QRVQAMKSPDHNGED-p;u|APRRRSPSPTPTPGP-p;u|LEKLTLNSPIFDKPL-p;u|QAFELILSPRSKESV-p;u|EKLATKSSPVKVGEK-p;u|ITDPVVLSPKDRVRD-p;u|LQKAGKLSPLKVQPK-p;u|EEWDPEYTPKSKKYY-p;u|KILIVTQTPHYMRRH-p;u…	NPGGRPITPPRNSAK-p;u|KIGPLGLSPKKVGDD-p;u|KKKRLVQSPNSYFMD-p;u|EKLATKSSPVKVGEK-p;u|ILDLISESPIKGRAQ-p;u|MYLSPVRSPKKKGST-p;u|ITDPVVLSPKDRVRD-p;u|PPPTRPVSPPQKAKE-p;u|QRVQAMKSPDHNGED-p;u|FDYRGRLSPVPVPRA-p;u|LQSASSHSPTPQRRP-p;u|EDDTVPLSPLKYMAQ-p;u|HKNETMLSPREKIFY-p;u|PNPSTSASPKKSPPP-p;u|TSCASLDSPGRIKRK-p;u|KTQTPPVSPAPQPTE-p;u|PSTSKAVSPPHLDGP-p;u|TPAAIPATPVAVSQP-p;u|RSHHAPMSPGSSGGG-p;u|SLESLYFTPIPARSQ-p;u…	EKLATKSSPVKVGEK-p;u|QSPGGFGSPAPSQAE-p;u|APRPVPGSPARDAPA-p;u|KKSIMVQSPEKAYSS-p;u|APRRRSPSPTPTPGP-p;u|AQNEATSTPHRIRRK-p;u|PNPSTSASPKKSPPP-p;u|FSDSTSKTPPQEELP-p;u|EFSSGAKSPSKSGAQ-p;u|TSCASLDSPGRIKRK-p;u|RLPEASQSPLVLKQA-p;u|LSEQNRASPLPSGLL-p;u|PSTSKAVSPPHLDGP-p;u|APAPAEKTPVKKKAR-p;u|SITSPPLSPALPKYK-p;u|HKNETMLSPREKIFY-p;u|KTQTPPVSPAPQPTE-p;u|LLEDGSESPAKRICP-p;u|DPQQLQLSPLKGLSL-p;u|PIPIMPASPQKGHAV-p;u…	EKLATKSSPVKVGEK-p;u|MYLSPVRSPKKKGST-p;u|PGGNIYISPLKSPYK-p;u|KMKNKPRSPVVELSK-p;u|PSTSKAVSPPHLDGP-p;u|FDYRGRLSPVPVPRA-p;u|GIPLPAESPKKGPKK-p;u|NAPTSHVTPSVKKRS-p;u|DTRQIQPSPPWSYDQ-p;u|AQNEATSTPHRIRRK-p;u|LNNSNLFSPVNRDSE-p;u|SLLTRSPTPAPFSPF-p;u|KTQTPPVSPAPQPTE-p;u|FSDSTSKTPPQEELP-p;u|DSFETQRTPRKSNLD-p;u|LPTPTKMTPRSRILV-p;u|IYISPLKSPYKISEG-p;u|TPMYGSQTPLQDGSR-p;u|PNPSTSASPKKSPPP-p;u|VNVIPPHTPVRTVMN-p;u…	QSPGGFGSPAPSQAE-p;u|KKSVITYSPTTGTCQ-p;u|AQNEATSTPHRIRRK-p;u|VEQELPSSPKQPICF-p;u|PSTSKAVSPPHLDGP-p;u|KKSIMVQSPEKAYSS-p;u|VLPSISLSPGPQPPK-p;u|KTQTPPVSPAPQPTE-p;u|ITDPVVLSPKDRVRD-p;u|LDTPGIISPGKQKRH-p;u|SSGVRAPSPAPSSVP-p;u|MYLSPVRSPKKKGST-p;u|RIDFIPVSPAPSPTR-p;u|KKKRLVQSPNSYFMD-p;u|PPPTRPVSPPQKAKE-p;u|TPMYGSQTPLQDGSR-p;u|TTLAGPLTPPVKHFQ-p;u|TSCASLDSPGRIKRK-p;u|FDYRGRLSPVPVPRA-p;u|ILDLISESPIKGRAQ-p;u…	LPNNTSSSPQPKKKP-p;u|SPTPAPFSPFNPTSL-p;u|WLDDLLASPPPSGGG-p;u|SLLTRSPTPAPFSPF-p;u|AGYVPIRTPARKLTA-p;u|PNPSTSASPKKSPPP-p;u|VLPSISLSPGPQPPK-p;u|KMKNKPRSPVVELSK-p;u|FDYRGRLSPVPVPRA-p;u|KILIVTQTPHYMRRH-p;u|LPTTVPESPNYRNTR-p;u|EDDTVPLSPLKYMAQ-p;u|PSTSKAVSPPHLDGP-p;u|MYLSPVRSPKKKGST-p;u|GLGRSITSPTTLYDR-p;u|SNLGHPESPPRKRLK-p;u|QPVSAPPSPRDISME-p;u|KTQTPPVSPAPQPTE-p;u|QSPGGFGSPAPSQAE-p;u|GSPNRAYTHQVVTRW-p;u…
[truncated: 134 more columns]

## Sheet: Table S5B
Table S5B: Results of the KEGG pathway analysis, related to Figure 5
geneSet	KEGG PATHWAY Database_Number	KEGG PATHWAY Database	description	size	overlap	expect	enrichmentRatio	pValue	-Log10( p-value )	FDR	overlapId	userId
hsa04520	4.3	4.3 Cellular community - eukaryotes	Adherens junction	72	20	2.26764	8.81975	2.95319e-14	13.5297	9.62741e-12	10458;1499;1500;2033;2534;4008;4087;4088;4233;4301;56288;5777;5818;5819;6714;7048;7082;7525;81;999	P06241;O60716;P55196;Q07157;P84022;Q8WWI1;Q9UQB8;P29350;P08581;P37173;Q09472;Q15223;Q8TEW0;Q92692;P35222;P12830;O43707;P07947;Q15796;P12931
hsa05203	6.1	6.1 Cancer: overview	Viral carcinogenesis	201	26	6.33049	4.10711	6.04308e-10	9.21874	9.85022e-08	121504;1654;2033;23513;2885;3105;3190;5315;554313;5829;6714;6850;7534;81;8294;8359;8360;8361;8362;8363;8364;8365;8366;8367;8368;8370	P14618;P43405;P49023;Q14160;P62805;P62805;P62805;P62805;P62805;P62805;P62805;P62805;P62805;P62805;P62805;P62805;P62805;P62805;Q09472;P62993;P63104;O43707;O00571;P61978;P04439;P12931
hsa05130	6.4	6.4 Infectious disease: bacterial	Pathogenic Escherichia coli infection	55	13	1.73222	7.5048	9.59258e-09	8.01806	1.04239e-06	100506658;10381;10383;1499;2017;203068;2534;3875;7430;7534;9076;9475;999	P06241;P15311;P07437;P05783;Q16625;Q14247;P35222;P12830;P63104;O95832;O75116;P68371;Q13509
hsa04530	4.3	4.3 Cellular community - eukaryotes	Tight junction	170	22	5.35415	4.10896	1.36596e-08	7.86456	1.11326e-06	100506658;10207;2017;23513;27134;3308;4301;4478;51208;51735;5584;56288;57530;5962;6714;7082;7430;81;9075;9076;9414;9475	P15311;P55196;Q07157;Q14160;Q16625;Q9UDY2;Q14247;P41743;P57739;Q8TEW0;P56856;O43707;Q8NI35;Q9P2M7;O95049;P34932;O95832;Q8TEU7;O75116;P26038;P12931;P35241
hsa04360	5.8	5.8 Development and regeneration	Axon guidance	175	21	5.51162	3.81013	1.12482e-07	6.94892	7.33385e-06	1072;1947;1948;1969;2041;2043;2049;22885;2534;3983;4233;54910;54961;56288;5781;5921;6091;6714;84448;8829;9475	P29317;P06241;P52799;Q9Y6N7;P98172;P08581;Q9C0C4;O94929;Q8TE77;P20936;Q8TEW0;P54753;P23528;Q6H8Q1;O14639;O14786;P21709;Q06124;P54764;O75116;P12931
hsa05100	6.4	6.4 Infectious disease: bacterial	Bacterial invasion of epithelial cells	74	13	2.33063	5.57789	4.06564e-07	6.39087	2.209e-05	10801;1499;2017;2549;391;4233;5829;63916;6464;6714;867;9564;999	P49023;Q9UHD8;P56945;Q14247;P08581;P22681;P35222;P29353;P12830;Q96JJ3;Q13480;P84095;P12931
hsa05322	6.6	6.6 Immune disease	Systemic lupus erythematosus	133	17	4.18883	4.05841	7.79817e-07	6.10801	3.2782e-05	121504;3014;554313;81;8294;8359;8360;8361;8362;8363;8364;8365;8366;8367;8368;8370;9555	P62805;P62805;P62805;P62805;P62805;P62805;P62805;P62805;P62805;P62805;P62805;P62805;P62805;P62805;O75367;P16104;O43707
hsa05034	6.8	6.8 Substance dependence	Alcoholism	180	20	5.6691	3.5279	8.04466e-07	6.09449	3.2782e-05	121504;2885;3014;5499;5500;554313;6464;8294;8359;8360;8361;8362;8363;8364;8365;8366;8367;8368;8370;9555	P62140;P62805;P62805;P62805;P62805;P62805;P62805;P62805;P62805;P62805;P62805;P62805;P62805;P62805;P62805;P62993;O75367;P29353;P16104;P62136
hsa04670	5.1	5.1 Immune system	Leukocyte transendothelial migration	112	15	3.52744	4.25238	1.95341e-06	5.70921	7.07568e-05	100506658;1499;1500;394;4301;4478;51208;5781;5829;7430;81;9075;9076;9475;9564	P15311;O60716;P49023;P55196;Q16625;P56945;Q13017;P57739;P56856;P35222;O43707;Q06124;O95832;O75116;P26038
hsa05205	6.1	6.1 Cancer: overview	Proteoglycans in cancer	198	20	6.23601	3.20718	3.62007e-06	5.44128	0.000118014	1499;2017;2065;2317;2549;2885;4087;4233;4478;5499;5500;5777;5781;5829;5962;6548;6714;7430;867;9475	P15311;P49023;P29350;P62140;Q14247;P08581;P62993;P22681;P35222;P21860;P19634;P62136;O75369;Q06124;Q13480;O75116;P26038;Q15796;P12931;P35241
hsa04510	4.3	4.3 Cellular community - eukaryotes	Focal adhesion	199	17	6.2675	2.7124	0.000166342	3.779	0.00492977	1499;2317;2534;2885;3655;3691;394;4233;5499;5500;5829;6464;6714;7094;81;9475;9564	P06241;P16144;P49023;P62140;P56945;Q13017;P08581;P62993;P35222;P29353;P23229;P62136;O43707;Q9Y490;O75369;O75116;P12931
hsa04390	3.2	3.2 Signal transduction	Hippo signaling pathway	154	14	4.85023	2.88646	0.000333407	3.47703	0.00905755	10207;10413;1499;23513;4087;4088;5499;5500;5584;56288;7048;7534;84962;999	Q14160;P84022;P62140;Q96IF1;P37173;P41743;Q8TEW0;P35222;P12830;P63104;P62136;Q8NI35;P46937;Q15796
hsa04810	4.5	4.5 Cell motility	Regulation of actin cytoskeleton	213	17	6.70843	2.53412	0.000374205	3.42689	0.00938392	10458;1072;1131;3655;3691;4478;54961;5499;5500;5829;5962;6548;6714;7430;81;9475;9564	P15311;P16144;P49023;Q9UQB8;P62140;P56945;Q8TE77;P20309;P23528;P23229;P19634;P62136;O43707;O75116;P26038;P12931;P35241
hsa05412	6.9	6.9 Cardiovascular disease	Arrhythmogenic right ventricular cardiomyopathy (ARVC)	72	8	2.26764	3.5279	0.00180403	2.74376	0.0420082	1499;1829;1832;27092;3655;3691;4000;5318	P16144;Q14126;P15924;P35222;P23229;Q99959;Q9UBN1;P02545
hsa04015	3.2	3.2 Signal transduction	Rap1 signaling pathway	206	15	6.48797	2.31197	0.00208009	2.68192	0.0452072	10636;1499;1500;1969;23094;26037;4233;4301;51735;5584;56288;6714;7094;9564;999	P29317;O60716;P55196;P56945;P08581;P41743;Q8TEW0;O43166;P35222;O60292;P12830;O43566;Q9Y490;Q8TEU7;P12931
hsa04144	4.1	4.1 Transport and catabolism	Endocytosis	244	16	7.68478	2.08204	0.0042755	2.36901	0.0871132	10015;10254;116984;27243;274;3105;4087;4088;55737;5584;56288;6714;7048;7251;80223;867	P84022;Q8WUM4;P37173;P41743;O00499;Q99816;Q8TEW0;O75886;P22681;O43633;Q8WZ64;Q96QK1;Q6WKZ4;P04439;Q15796;P12931
hsa04662	5.1	5.1 Immune system	B cell receptor signaling pathway	71	7	2.23614	3.13039	0.00672919	2.17204	0.129042	118788;27071;2885;3635;3636;5777;6850	P43405;Q6ZUJ8;P29350;O15357;P62993;Q92835;Q9UN19
hsa04666	5.1	5.1 Immune system	Fc gamma R-mediated phagocytosis	91	8	2.86604	2.7913	0.00769545	2.11377	0.139373	1072;274;3635;3636;4651;5580;6850;9846	P43405;O15357;Q05655;Q9UQC2;O00499;P23528;Q9HD67;Q92835
hsa05220	6.2	6.2 Cancer: specific types	Chronic myeloid leukemia	76	7	2.39362	2.92444	0.00969492	2.01346	0.166344	2885;4088;5781;6464;7048;867;9846	P84022;P37173;Q9UQC2;P62993;P22681;P29353;Q06124
hsa05168	6.3	6.3 Infectious disease: viral	Herpes simplex infection	185	12	5.82657	2.05953	0.0137097	1.86297	0.223468	1965;2033;3105;3150;3190;5499;5500;5781;5818;5819;6428;6431	P62140;Q09472;Q15223;Q92692;P05114;P05198;P62136;Q13247;Q06124;P61978;P84103;P04439
hsa04514	3.3	3.3 Signaling molecules and interaction	Cell adhesion molecules (CAMs)	144	10	4.53528	2.20494	0.0152609	1.81642	0.236908	100506658;3105;3655;51208;5818;5819;9019;9075;9076;999	Q16625;P57739;Q15223;Q92692;P56856;P23229;P12830;O95832;P04439;O95297
hsa05206	6.1	6.1 Cancer: overview	MicroRNAs in cancer	150	10	4.72425	2.11674	0.0197744	1.7039	0.293021	2033;2065;2885;3190;4233;5268;5962;6464;7430;9252	P15311;P08581;Q09472;P62993;P21860;P29353;P36952;O75582;P61978;P35241
hsa04130	2.3	2.3 Folding, sorting and degradation	SNARE interactions in vesicular transport	34	4	1.07083	3.73542	0.0211942	1.67378	0.300405	10490;6810;8417;9342	O15400;Q12846;O95721;Q9UEU0
hsa03040	2.1	2.1 Transcription	Spliceosome	133	9	4.18883	2.14857	0.0242065	1.61607	0.328805	11338;144983;22985;27316;3178;3190;494115;6428;6431	P38159;Q9UKV3;P26368;Q32P51;Q13247;P61978;P09651;P84103;Q96E39
hsa01521	6.1	6.12 Drug resistance: antineoplastic	EGFR tyrosine kinase inhibitor resistance	79	6	2.4881	2.41148	0.0377163	1.42347	0.473833	2065;2549;2885;4233;6464;6714	P08581;P62993;P21860;P29353;Q13480;P12931
hsa05225	6.2	6.2 Cancer: specific types	Hepatocellular carcinoma	167	10	5.25966	1.90126	0.0377904	1.42262	0.473833	1499;2549;2885;2950;4087;4088;4233;6464;6603;7048	P84022;P08581;P37173;P62993;P35222;P29353;P09211;Q13480;Q92925;Q15796
hsa04611	5.1	5.1 Immune system	Platelet activation	123	8	3.87388	2.06511	0.0399044	1.39898	0.481808	2534;5499;5500;5584;6714;6850;7094;9475	P06241;P43405;P62140;P41743;P62136;Q9Y490;O75116;P12931
hsa05226	6.2	6.2 Cancer: specific types	Gastric cancer	148	9	4.66126	1.93081	0.0436906	1.35961	0.508683	1499;2549;2885;4087;4088;4233;6464;7048;999	P84022;P08581;P37173;P62993;P35222;P29353;P12830;Q13480;Q15796

## Sheet: Table S5C
Table S5C: Correlation between drug sensitivity to FDA-approved inhibitors (CTD2 cell line pharmacological profiling data) and phosphorylation level of PARD3 Y378-p, related to Figure 5
								Mutational status	BRAF/ KRAS wt	BRAF mut	KRAS mut	KRAS mut	BRAF mut	BRAF mut	BRAF/ KRAS wt	KRAS mut	KRAS mut	KRAS mut	KRAS mut	BRAF mut	BRAF/ KRAS wt	BRAF/ KRAS wt	KRAS mut	KRAS mut	KRAS mut	KRAS mut
								Phosphorylation level of PARD3 Y378	-0.433182	-1.81826	-0.25118	0.998506	-1.07722	-0.454472	-1.11604	2.12096	-0.664418	0.514957	0.234214	-1.95711	0.257511	-1.69017	0.0148973	0.245751	1.53691	0.0296862
cpd_name	master_cpd_id	broad_cpd_id	inclusion_rationale	cpd_status	gene_symbol_of_protein_target	source_name	source_catalog_id	cpd_smiles	CCK-81	COLO-205	HCT-116	HCT-15	HT-115	HT-29	HT55	LoVo	LS-1034	LS-180	LS-513	MDST8	NCI-H508	NCI-H716	NCI-H747	RCM-1	SK-CO-1	SW1463	Number of VV (/18)	Spearman correlation coefficient (vs. p-level of PARD3_Y378-p)	-Log10(p-value)	P value summary	Number of XY Pairs
dasatinib	52882	BRD-K49328571	CTEP;kinome;std-of-care	FDA	EPHA2;KIT;LCK;SRC;YES1	Selleck	S1021	Cc1nc(Nc2ncc(s2)C(=O)Nc2c(C)cccc2Cl)cc(n1)N1CCN(CCO)CC1	9.4582	13.041	14.03	9.046	10.363	12.821	10.954	6.3046	13.128	10.598	12.185	12.68	12.091	10.751	7.4511	11.912	8.9047	NA	17	-0.536765	1.54821	*	17
gefitinib	52926	BRD-K64052750	chromatin;CTEP;kinome;std-of-care	FDA	AKT1;EGFR	Selleck	S1025	COc1cc2ncnc(Nc3ccc(F)c(Cl)c3)c2cc1OCCCN1CCOCC1	9.2745	13.042	13.441	11.763	7.8967	13.606	10.617	11.273	12.792	11.912	12.089	16.22	8.5517	14.116	9.5085	13.536	10.749	7.7266	18	-0.343653	0.788879	ns	18
ruxolitinib	639450	BRD-K53972329	kinome;std-of-care	FDA	JAK1;JAK2	Selleck	S1378	N#CC[C@H](C1CCCC1)n1cc(cn1)-c1ncnc2[nH]ccc12	14.549	14.921	14.884	14.67	14.878	14.897	14.911	14.25	14.822	14.384	14.464	14.812	14.837	13.497	18.349	14.924	14.221	NA	17	-0.32598	0.695941	ns	17
temsirolimus	660358	BRD-K08177763	CTEP;kinome;std-of-care	FDA	MTOR	Selleck	S1044	CO[C@@H]1C[C@H](C[C@@H](C)[C@@H]2CC(=O)[C@H](C)\C=C(C)\[C@@H](O)[C@@H](OC)C(=O)[C@H](C)C[C@H](C)\C=C\C=C\C=C(C)\[C@H](C[C@@H]3CC[C@@H](C)[C@@](O)(O3)C(=O)C(=O)N3CCCC[C@H]3C(=O)O2)OC)CC[C@H]1OC(=O)C(C)(CO)CO	14.148	14.983	13.968	NA	11.161	13.832	13.048	9.8262	NA	13.554	11.098	9.3266	12.792	NA	NA	NA	8.9504	NA	12	-0.321678	0.510745	ns	12
lapatinib	634309	BRD-K19687926	CTEP;kinome;std-of-care	FDA	EGFR;ERBB2	Selleck	S1028	CS(=O)(=O)CCNCc1ccc(o1)-c1ccc2ncnc(Nc3ccc(OCc4cccc(F)c4)c(Cl)c3)c2c1	7.9048	13.879	14.732	11.682	8.9094	13.859	10.745	10.211	13.65	12.664	12.585	14.919	10.207	13.252	11.084	13.74	13.815	NA	17	-0.284314	0.572189	ns	17
bosutinib	660346	BRD-K90746395	kinome	FDA	ABL1;SRC	Selleck	S1014	COc1cc(Nc2cc(nc3cc(OCCCN4CCN(C)CC4)c(OC)cc23)C#N)c(Cl)cc1Cl	10.91	12.058	12.718	10.78	10.004	13.279	10.453	9.3869	12.139	11.906	11.246	12.053	10.368	12.209	10.21	11.898	12.314	NA	17	-0.264706	0.517984	ns	17
sunitinib	374750	BRD-K42828737	CTEP;kinome	FDA	FLT1;FLT3;KDR;KIT;PDGFRA;PDGFRB	Selleck	S1042	CCN(CC)CCNC(=O)c1c(C)[nH]c(\C=C2/C(=O)Nc3ccc(F)cc23)c1C	11.83	12.639	13.222	10.45	NA	13.378	11.633	10.814	11.343	12.754	11.845	12.78	12.021	9.4019	12.005	12.556	11.437	NA	16	-0.247059	0.449772	ns	16
vandetanib	349002	BRD-K77625799	kinome;std-of-care	FDA	EGFR;KDR	Selleck	S1046	COc1cc2c(Nc3ccc(Br)cc3F)ncnc2cc1OCC1CCN(C)CC1	10.437	14.756	14.122	12.168	9.1463	14.8	11.467	10.101	13.03	11.754	12.89	14.081	11.821	10.877	11.146	12.873	12.961	NA	17	-0.196078	0.347464	ns	17
erlotinib	52928	BRD-K70401845	CTEP;kinome;std-of-care	FDA	EGFR;ERBB2	Selleck	S1023	COCCOc1cc2ncnc(Nc3cccc(c3)C#C)c2cc1OCCOC	10.184	13.443	13.801	12.877	9.5106	14.519	10.555	11.011	15.82	12.263	14.216	13.967	10.54	13.597	9.6382	13.195	13.675	NA	17	-0.178922	0.309184	ns	17
regorafenib	628613	BRD-K16730910	kinome	FDA	BRAF;KDR;KIT;RET	Selleck	S1178	CNC(=O)c1cc(Oc2ccc(NC(=O)Nc3ccc(Cl)c(c3)C(F)(F)F)c(F)c2)ccn1	15.815	14.677	15.981	11.634	14.607	15.496	14.08	13.166	12.462	14.863	15	14.8	14.724	NA	12.497	14.339	14.637	NA	16	-0.176471	0.29056	ns	16
nilotinib	374749	BRD-K81528515	kinome;std-of-care	FDA	ABL1;BCR;KIT	Selleck	S1033	Cc1cn(cn1)-c1cc(NC(=O)c2ccc(C)c(Nc3nccc(n3)-c3cccnc3)c2)cc(c1)C(F)(F)F	15.983	14.757	14.469	15.879	15	14.559	15.128	15.294	15.388	14.133	14.645	14.926	14.415	16.866	12.121	13.704	15.908	NA	17	-0.134804	0.218029	ns	17
sorafenib	349006	BRD-K23984367	CTEP;kinome;std-of-care	FDA	BRAF;FLT3;KDR;RAF1	Cayman	10009644	CNC(=O)c1cc(Oc2ccc(NC(=O)Nc3ccc(Cl)c(c3)C(F)(F)F)cc2)ccn1	18.102	13.477	12.848	11.965	13.611	13.348	12.606	15.683	13.223	12.759	12.615	15.477	13.313	10.066	12.244	13.514	12.779	NA	17	-0.10049	0.154096	ns	17
sirolimus	56703	BRD-K84937637	kinome	FDA	MTOR	Selleck	S1039	CO[C@@H]1C[C@H](C[C@@H](C)[C@@H]2CC(=O)[C@H](C)\C=C(C)\[C@@H](O)[C@@H](OC)C(=O)[C@H](C)C[C@H](C)\C=C\C=C\C=C(C)\[C@H](C[C@@H]3CC[C@@H](C)[C@@](O)(O3)C(=O)C(=O)N3CCCC[C@H]3C(=O)O2)OC)CC[C@H]1O	13.766	15	15	10.946	12.313	16.75	13.447	8.7807	10.039	14.086	13.427	9.1724	12.359	11.745	6.9328	14.903	12.922	NA	17	-0.0993256	0.153045	ns	17
crizotinib	628603	BRD-K78431006	kinome;std-of-care	FDA	ALK;MET	Selleck	S1068	C[C@@H](Oc1cc(cnc1N)-c1cnn(c1)C1CCNCC1)c1c(Cl)ccc(F)c1Cl	10.438	10.571	12.159	12.405	9.8948	12.091	11.056	10.039	11.601	11.131	10.487	12.224	11.384	10.785	11.439	12.265	9.1318	NA	17	-0.0759804	0.111877	ns	17
axitinib	348990	BRD-K29905972	kinome	FDA	FLT1;FLT3;KDR;KIT;PDGFRA;PDGFRB	Selleck	S1005	CNC(=O)c1ccccc1Sc1ccc2c(\C=C\c3ccccn3)n[nH]c2c1	13.854	11.398	16.061	13.834	12.946	14.721	13.606	13.351	13.817	14.206	12.659	14.815	11.73	6.4238	13.641	14.718	13.933	NA	17	0.137255	0.222863	ns	17
cabozantinib	660840	BRD-K51544265	CTEP;kinome	FDA	FLT3;KDR;MET;RET	Selleck	S1119	COc1cc2nccc(Oc3ccc(NC(=O)C4(CC4)C(=O)Nc4ccc(F)cc4)cc3)c2cc1OC	NA	12.52	14.555	12.744	13.972	13.808	12.882	10.431	13.087	13.999	12.575	12.426	13.849	9.3579	11.137	13.63	12.843	NA	16	0.141176	0.220764	ns	16
pazopanib	640265	BRD-K74514084	CTEP;kinome;std-of-care	FDA	FLT1;FLT3;KDR;KIT;PDGFRB	Selleck	S1035	CN(c1ccc2c(C)n(C)nc2c1)c1ccnc(Nc2ccc(C)c(c2)S(N)(=O)=O)n1	12.98	13.347	14.956	13.289	12.993	13.975	13.32	12.135	13.503	13.77	13.751	13.324	14.486	7.7754	15.666	14.597	14.032	10.362	18	0.234262	0.456553	ns	18
PLX-4032	649420	BRD-K56343971	kinome;pilot-set;std-of-care	FDA	BRAF	Selleck;Sequoia Research Products	S1267;S1267	CCCS(=O)(=O)Nc1ccc(F)c(C(=O)c2c[nH]c3ncc(cc23)-c2ccc(Cl)cc2)c1F	17.034	12.797	14.92	13.974	15	15	14.635	18.387	14.35	15	15.529	14.553	13.862	14.998	NA	14.585	16.254	NA	16	0.368733	0.794525	ns	16
